# Supplementary material for: Dehydration Alters Transcript Levels in the Mosquito Midgut, Likely Facilitating Rapid Rehydration following a Bloodmeal
Source: Insects. 2023 Mar 9;14(3):274. doi: 10.3390/insects14030274 (PMC10056721; doi:10.3390/insects14030274)
Supplement: Supplementary file 1 [file insects-14-00274-s001.zip]

Archive with 7 entries (7 files):
- Supplemental_Figures.pdf
- Supplementary_Table_S1.xlsx
- Supplementary_Table_S2.xlsx
- Supplementary_Table_S3.xlsx
- Supplementary_Table_S4.xlsx
- Supplementary_Table_S5.xlsx
- Supplementary_Table_S6.xlsx
