# Supplementary material for: Dehydration Alters Transcript Levels in the Mosquito Midgut, Likely Facilitating Rapid Rehydration following a Bloodmeal
Source: Insects. 2023 Mar 9;14(3):274. doi: 10.3390/insects14030274 (PMC10056721; doi:10.3390/insects14030274)
Supplement: Supplementary file 1 [file insects-14-00274-s001.zip › Supplementary_Table_S1.xlsx]

## Sheet: Y1N1
Gene	Expression	Nucleotide	Protein	Description
AAEL011254-RE	Up in Y1	XM_021857682.1	XP_021713374	aprataxin and PNK-like factor isoform X5 [Aedes aegypti]
AAEL001742-RC	Up in Y1	XM_021840589.1	XP_021696271	serine/threonine-protein phosphatase 6 regulatory subunit 3 [Aedes aegypti] >ref|XP_021696272.1| serine/threonine-protein phosphatase 6 regulatory subunit 3 [Aedes aegypti] >ref|XP_021696273.1| serine/threonine-protein phosphatase 6 regulatory subunit 3 [Aedes aegypti] >ref|XP_021696274.1| serine/threonine-protein phosphatase 6 regulatory subunit 3 [Aedes aegypti] >ref|XP_021696275.1| serine/thre…
AAEL006973-RA	Up in Y1	XM_001652386.2	XP_001652436	uncharacterized protein LOC5568606 [Aedes aegypti] >ref|XP_021702787.1| uncharacterized protein LOC5568606 [Aedes aegypti] >ref|XP_021702788.1| uncharacterized protein LOC5568606 [Aedes aegypti] >gb|EAT41367.1| AAEL006973-PA [Aedes aegypti]
AAEL010932-RC	Up in Y1	XM_021848642.1	XP_021704334	uncharacterized protein LOC110677665 isoform X2 [Aedes aegypti]
AAEL001690-RA	Up in Y1	XM_001659911.2	XP_001659961	chymotrypsin-2 [Aedes aegypti] >gb|EAT47186.1| AAEL001690-PA [Aedes aegypti]
AAEL019469-RA	Up in Y1	XM_021846069.1	XP_001663776	protein G12 [Aedes aegypti] >ref|XP_021701761.1| protein G12 [Aedes aegypti] >ref|XP_021701762.1| protein G12-like [Aedes aegypti] >ref|XP_021712126.1| protein G12-like [Aedes aegypti] >gb|AAL05408.1| microvilli membrane protein [Aedes aegypti] >gb|EAT34153.1| AAEL013577-PC [Aedes aegypti] >gb|EAT34155.1| AAEL013577-PB [Aedes aegypti] >gb|EAT37592.1| AAEL010431-PA [Aedes aegypti]
AAEL009764-RB	Up in Y1	XM_001660288.2	XP_001660338	xaa-Pro aminopeptidase ApepP isoform X1 [Aedes aegypti]
AAEL019470-RA	Up in Y1	XM_001660777.2	XP_001660827	protein G12 [Aedes aegypti] >gb|EAT37594.1| AAEL010429-PA [Aedes aegypti]
AAEL007765-RE	Up in Y1	XM_021844046.1	XP_021699738	serine protease inhibitor 42Dd isoform X1 [Aedes aegypti]
AAEL012595-RH	Up in Y1	XM_021839090.1	XP_021694782	uncharacterized protein LOC5576540 isoform X1 [Aedes aegypti] >ref|XP_021694783.1| uncharacterized protein LOC5576540 isoform X1 [Aedes aegypti] >ref|XP_021694784.1| uncharacterized protein LOC5576540 isoform X1 [Aedes aegypti] >ref|XP_021694785.1| uncharacterized protein LOC5576540 isoform X1 [Aedes aegypti] >ref|XP_021694786.1| uncharacterized protein LOC5576540 isoform X1 [Aedes aegypti] >ref|…
AAEL001696-RC	Up in Y1	XM_021841461.1	XP_021697153	retinal homeobox protein Rax isoform X2 [Aedes aegypti]
AAEL004688-RB	Up in Y1	XM_021846074.1	XP_021701766	beta-1,4-mannosyltransferase egh [Aedes aegypti] >ref|XP_021701771.1| beta-1,4-mannosyltransferase egh [Aedes aegypti] >ref|XP_021701779.1| beta-1,4-mannosyltransferase egh [Aedes aegypti] >ref|XP_021701784.1| beta-1,4-mannosyltransferase egh [Aedes aegypti] >ref|XP_021701794.1| beta-1,4-mannosyltransferase egh [Aedes aegypti] >ref|XP_021701804.1| beta-1,4-mannosyltransferase egh [Aedes aegypti]
AAEL006381-RA	Up in Y1	XM_001651908.2	XP_001651958	sphingomyelin phosphodiesterase [Aedes aegypti]
AAEL010435-RB	Up in Y1	XM_021846068.1	XP_021701760	protein G12 [Aedes aegypti]
AAEL006226-RB	Up in Y1	XM_021840813.1	XP_001657595	deoxynucleoside triphosphate triphosphohydrolase SAMHD1 [Aedes aegypti] >ref|XP_021696505.1| deoxynucleoside triphosphate triphosphohydrolase SAMHD1 [Aedes aegypti]
AAEL007114-RA	Up in Y1	XM_001652497.2	XP_001652547	protein pinocchio isoform X2 [Aedes aegypti] >gb|EAT41216.1| AAEL007114-PA [Aedes aegypti]
AAEL002636-RA	Up in Y1	XM_001661910.2	XP_001661960	protein ABHD13 [Aedes aegypti] >ref|XP_021700369.1| protein ABHD13 [Aedes aegypti] >ref|XP_021700370.1| protein ABHD13 [Aedes aegypti] >ref|XP_021700371.1| protein ABHD13 [Aedes aegypti] >gb|ABF18278.1| predicted alpha/beta hydrolase BEM46 [Aedes aegypti] >gb|EAT46146.1| AAEL002636-PA [Aedes aegypti]
AAEL007432-RA	Up in Y1	XM_001658309.2	XP_001658359	brachyurin [Aedes aegypti] >gb|ACV07660.1| serine protease I [Aedes aegypti]
AAEL001656-RA	Up in Y1	XM_001653714.2	XP_001653764	putative inorganic phosphate cotransporter isoform X2 [Aedes aegypti] >gb|EAT47235.1| AAEL001656-PA [Aedes aegypti]
AAEL015136-RA	Up in Y1	XM_001647755.2	XP_001647805	protein NPC2 homolog [Aedes aegypti]
AAEL013492-RA	Up in Y1	XM_001663638.3	XP_001663688	phenoloxidase 2 [Aedes aegypti] >ref|XP_021699380.1| phenoloxidase 2 [Aedes aegypti]
AAEL006628-RC	Up in Y1	XM_021848198.1	XP_021703890	chromatin complexes subunit BAP18 isoform X2 [Aedes aegypti]
AAEL013128-RI	Up in Y1	XM_021843292.1	EAT34657	AAEL013128-PA [Aedes aegypti]
AAEL013118-RB	Up in Y1	XM_001656325.2	XP_001656375	protein G12 [Aedes aegypti] >gb|EAT34666.1| AAEL013118-PB [Aedes aegypti]
AAEL019737-RD	Up in Y1	XM_021838820.1	XP_021694498	disks large 1 tumor suppressor protein isoform X1 [Aedes aegypti] >ref|XP_021694499.1| disks large 1 tumor suppressor protein isoform X1 [Aedes aegypti] >ref|XP_021694500.1| disks large 1 tumor suppressor protein isoform X1 [Aedes aegypti] >ref|XP_021694501.1| disks large 1 tumor suppressor protein isoform X1 [Aedes aegypti]
AAEL001887-RD	Up in Y1	XM_001654135.2	XP_001654185	glutamine synthetase 1, mitochondrial [Aedes aegypti] >ref|XP_001654186.1| glutamine synthetase 1, mitochondrial [Aedes aegypti] >gb|EAT46939.1| AAEL001887-PA [Aedes aegypti] >gb|EAT46940.1| AAEL001887-PB [Aedes aegypti]
AAEL002467-RA	Up in Y1	XM_001655315.2	AAL05409	peritrophin [Aedes aegypti]
AAEL009479-RB	Up in Y1	XM_021843405.1	XP_021699097	proton-coupled amino acid transporter-like protein CG1139 [Aedes aegypti]
AAEL013127-RB	Up in Y1	XM_001659734.2	XP_001656378	protein G12 isoform X1 [Aedes aegypti] >ref|XP_001659784.2| protein G12 isoform X1 [Aedes aegypti] >gb|EAT34669.1| AAEL013127-PB [Aedes aegypti]
AAEL019471-RA	Up in Y1	XM_021846069.1	XP_001663776	protein G12 [Aedes aegypti] >ref|XP_021701761.1| protein G12 [Aedes aegypti] >ref|XP_021701762.1| protein G12-like [Aedes aegypti] >ref|XP_021712126.1| protein G12-like [Aedes aegypti] >gb|AAL05408.1| microvilli membrane protein [Aedes aegypti] >gb|EAT34153.1| AAEL013577-PC [Aedes aegypti] >gb|EAT34155.1| AAEL013577-PB [Aedes aegypti] >gb|EAT37592.1| AAEL010431-PA [Aedes aegypti]
AAEL006264-RC	Up in Y1	XM_021844094.1	XP_021699786	solute carrier family 2, facilitated glucose transporter member 3 isoform X2 [Aedes aegypti]
AAEL001887-RC	Up in Y1	XM_001654136.2	XP_001654185	glutamine synthetase 1, mitochondrial [Aedes aegypti] >ref|XP_001654186.1| glutamine synthetase 1, mitochondrial [Aedes aegypti] >gb|EAT46939.1| AAEL001887-PA [Aedes aegypti] >gb|EAT46940.1| AAEL001887-PB [Aedes aegypti]
AAEL009165-RA	Up in Y1	XM_001656327.2	XP_021701763	protein G12 isoform X1 [Aedes aegypti] >gb|EAT38997.1| AAEL009165-PA [Aedes aegypti]
AAEL023729-RA	Up in Y1	XM_021852277.1	XP_021707969	trypsin 5G1-like [Aedes aegypti]
AAEL014274-RA	Up in Y1	XM_001648283.2	XP_001648333	uncharacterized protein LOC5564013 isoform X2 [Aedes aegypti] >gb|EAT33451.1| AAEL014274-PA [Aedes aegypti]
AAEL000566-RA	Up in Y1	XM_021852255.1	XP_021707947	uncharacterized protein LOC5564310 [Aedes aegypti]
AAEL006870-RG	Up in Y1	XM_021850671.1	XP_001652281	sorting nexin-17 [Aedes aegypti] >ref|XP_021706358.1| sorting nexin-17 [Aedes aegypti] >ref|XP_021706359.1| sorting nexin-17 [Aedes aegypti] >ref|XP_021706360.1| sorting nexin-17 [Aedes aegypti] >ref|XP_021706361.1| sorting nexin-17 [Aedes aegypti] >ref|XP_021706362.1| sorting nexin-17 [Aedes aegypti] >ref|XP_021706363.1| sorting nexin-17 [Aedes aegypti] >gb|EAT41496.1| AAEL006870-PA [Aedes aegyp…
AAEL026025-RA	Up in Y1	XM_001663726.2	XP_001663776	protein G12 [Aedes aegypti] >ref|XP_021701761.1| protein G12 [Aedes aegypti] >ref|XP_021701762.1| protein G12-like [Aedes aegypti] >ref|XP_021712126.1| protein G12-like [Aedes aegypti] >gb|AAL05408.1| microvilli membrane protein [Aedes aegypti] >gb|EAT34153.1| AAEL013577-PC [Aedes aegypti] >gb|EAT34155.1| AAEL013577-PB [Aedes aegypti] >gb|EAT37592.1| AAEL010431-PA [Aedes aegypti]
AAEL024506-RA	Up in Y1	XM_021856920.1	XP_021712612	WD repeat-containing protein 55 homolog [Aedes aegypti]
AAEL013715-RA	Up in Y1	XM_001663848.2	XP_001663898	trypsin 5G1-like [Aedes aegypti]
AAEL026215-RD	Up in Y1	XM_021856037.1	XP_011493320	heat shock 70 kDa protein cognate 3 [Aedes aegypti] >ref|XP_021707218.1| heat shock 70 kDa protein cognate 3 [Aedes aegypti] >ref|XP_021711729.1| heat shock 70 kDa protein cognate 3 [Aedes aegypti] >ref|XP_021711730.1| heat shock 70 kDa protein cognate 3 [Aedes aegypti] >ref|XP_021711731.1| heat shock 70 kDa protein cognate 3 [Aedes aegypti] >ref|XP_021711733.1| heat shock 70 kDa protein cognate …
AAEL010202-RA	Up in Y1	XM_001660626.2	XP_001660676	trypsin 5G1-like [Aedes aegypti] >gb|ACV07666.1| serine protease VII [Aedes aegypti] >gb|EAT34028.1| AAEL013713-PA [Aedes aegypti]
AAEL026981-RA	Up in Y1	XM_001663726.2	XP_001663776	protein G12 [Aedes aegypti] >ref|XP_021701761.1| protein G12 [Aedes aegypti] >ref|XP_021701762.1| protein G12-like [Aedes aegypti] >ref|XP_021712126.1| protein G12-like [Aedes aegypti] >gb|AAL05408.1| microvilli membrane protein [Aedes aegypti] >gb|EAT34153.1| AAEL013577-PC [Aedes aegypti] >gb|EAT34155.1| AAEL013577-PB [Aedes aegypti] >gb|EAT37592.1| AAEL010431-PA [Aedes aegypti]
AAEL009438-RA	Up in Y1	XM_001660004.2	XP_001660054	ATP-dependent DNA helicase DDX11 [Aedes aegypti] >gb|EAT38683.1| AAEL009438-PA [Aedes aegypti]
AAEL001104-RB	Up in Y1	XM_021855928.1	XP_021711620	drebrin-like protein isoform X1 [Aedes aegypti]
AAEL009660-RC	Up in Y1	XM_021850587.1	XP_021706279	serine/arginine repetitive matrix protein 2 isoform X3 [Aedes aegypti]
AAEL012072-RB	Up in Y1	XM_001662186.2	RXG60188	histone H3 [Armadillidium vulgare]
AAEL008364-RB	Up in Y1	XM_021849247.1	XP_021704939	serine protease inhibitor 88Ea isoform X1 [Aedes aegypti]
AAEL015073-RB	Up in Y1	XM_021846195.1	XP_021701887	T-box protein H15 [Aedes aegypti]
AAEL008370-RA	Up in Y1	XM_001653175.3	XP_001653225	protein peste [Aedes aegypti] >ref|XP_021709728.1| protein peste [Aedes aegypti] >ref|XP_021709729.1| protein peste [Aedes aegypti] >ref|XP_021709730.1| protein peste [Aedes aegypti] >ref|XP_021709732.1| protein peste [Aedes aegypti] >ref|XP_021709733.1| protein peste [Aedes aegypti] >ref|XP_021709734.1| protein peste [Aedes aegypti]
AAEL009166-RA	Up in Y1	XM_001656328.2	XP_001656378	protein G12 isoform X1 [Aedes aegypti] >ref|XP_001659784.2| protein G12 isoform X1 [Aedes aegypti] >gb|EAT34669.1| AAEL013127-PB [Aedes aegypti]
AAEL006133-RB	Up in Y1	XM_021850153.1	XP_021705845	programmed cell death protein 7 isoform X1 [Aedes aegypti]
AAEL024439-RA	Up in Y1	XR_002500673.1	XP_021701457	uncharacterized protein LOC110676737 [Aedes aegypti]
AAEL011158-RC	Up in Y1	XM_021855728.1	XP_001661452	apoptosis-inducing factor 3 isoform X1 [Aedes aegypti]
AAEL013712-RA	Up in Y1	XM_001663845.2	EAT34030	AAEL013706-PA [Aedes aegypti]
AAEL007601-RA	Up in Y1	XM_001658441.2	XP_001658491	trypsin 5G1-like [Aedes aegypti]
AAEL026602-RA	Up in Y1	XM_021848540.1	XP_021704232	L-ascorbate oxidase [Aedes aegypti]
AAEL011099-RB	Up in Y1	XM_021844408.1	XP_021700100	FAD synthase isoform X1 [Aedes aegypti]
AAEL014130-RA	Up in Y1	XM_001648034.2	XP_001648084	abl interactor 2 [Aedes aegypti] >ref|XP_021694457.1| abl interactor 2 [Aedes aegypti] >ref|XP_021694458.1| abl interactor 2 [Aedes aegypti] >gb|EAT33596.1| AAEL014130-PA [Aedes aegypti]
AAEL010196-RA	Up in Y1	XM_001660623.2	XP_001660673	trypsin 5G1-like [Aedes aegypti] >gb|ACV07665.1| serine protease VI [Aedes aegypti]
AAEL004451-RD	Up in Y1	XM_021849716.1	XP_021705408	organic cation transporter protein isoform X1 [Aedes aegypti] >ref|XP_021705409.1| organic cation transporter protein isoform X1 [Aedes aegypti] >ref|XP_021705410.1| organic cation transporter protein isoform X1 [Aedes aegypti]
AAEL026600-RA	Up in Y1	XM_021856436.1	XP_021712128	programmed cell death 6-interacting protein-like [Aedes aegypti]
AAEL009762-RB	Up in Y1	XM_021838794.1	XP_021694486	cytochrome P450 307a1 [Aedes aegypti]
AAEL007030-RD	Up in Y1	XM_021847368.1	XP_001658093	neutral ceramidase [Aedes aegypti] >ref|XP_021703048.1| neutral ceramidase [Aedes aegypti] >ref|XP_021703054.1| neutral ceramidase [Aedes aegypti] >ref|XP_021703060.1| neutral ceramidase [Aedes aegypti]
AAEL001674-RA	Up in Y1	XM_001659912.2	XP_001659962	serine protease SP24D [Aedes aegypti] >gb|EAT47187.1| AAEL001674-PA [Aedes aegypti]
AAEL002555-RB	Up in Y1	XM_021857728.1	XP_021713420	sodium-coupled monocarboxylate transporter 1 isoform X2 [Aedes aegypti] >ref|XP_021713421.1| sodium-coupled monocarboxylate transporter 1 isoform X2 [Aedes aegypti]
AAEL014754-RA	Up in Y1	XM_001649489.2	XP_001649539	cytochrome b5 [Aedes aegypti] >gb|EAT39603.1| AAEL008606-PA [Aedes aegypti]
AAEL008769-RA	Up in Y1	XM_001659442.2	XP_001659492	serine protease SP24D [Aedes aegypti]
AAEL019371-RA	Up in Y1	XM_001662628.3	XP_021710164	LOW QUALITY PROTEIN: putative ATP synthase subunit f, mitochondrial [Aedes aegypti]
AAEL002269-RA	Up in Y1	XM_001661117.2	XP_001661167	purine nucleoside phosphorylase isoform X2 [Aedes aegypti] >gb|EAT46566.1| AAEL002269-PA [Aedes aegypti]
AAEL003611-RA	Up in Y1	XM_001657031.2	XP_001657081	acyl-CoA Delta(11) desaturase [Aedes aegypti] >ref|XP_021711121.1| acyl-CoA Delta(11) desaturase [Aedes aegypti]
AAEL019424-RX	Up in Y1	XM_021838924.1	XP_021694616	protein lap4 isoform X5 [Aedes aegypti]
AAEL001693-RA	Up in Y1	XM_001659920.2	XP_001659970	serine protease SP24D [Aedes aegypti]
AAEL014410-RA	Up in Y1	XM_001648674.2	XP_001648724	uncharacterized protein LOC5564378 [Aedes aegypti] >ref|XP_021693779.1| uncharacterized protein LOC5564378 [Aedes aegypti] >ref|XP_021693780.1| uncharacterized protein LOC5564378 [Aedes aegypti]
AAEL026677-RA	Up in Y1	XM_021838530.1	XP_021694222	myosin heavy chain IB-like [Aedes aegypti]
AAEL020321-RA	Up in Y1	XR_002499225.1	not available	not available
AAEL028021-RB	Up in Y1	XM_021839113.1	XP_021694805	uncharacterized protein LOC5564091 isoform X2 [Aedes aegypti] >ref|XP_021694806.1| uncharacterized protein LOC5564091 isoform X2 [Aedes aegypti] >ref|XP_021694807.1| uncharacterized protein LOC5564091 isoform X2 [Aedes aegypti] >ref|XP_021694809.1| uncharacterized protein LOC5564091 isoform X2 [Aedes aegypti] >ref|XP_021694810.1| uncharacterized protein LOC5564091 isoform X2 [Aedes aegypti]
AAEL019537-RA	Up in Y1	XM_021843296.1	XP_021698987	guanine nucleotide-binding protein G(f) subunit alpha [Aedes aegypti] >ref|XP_021698988.1| guanine nucleotide-binding protein G(f) subunit alpha [Aedes aegypti]
AAEL006434-RB	Up in Y1	XM_021847866.1	XP_001657807	polyserase-2 isoform X1 [Aedes aegypti] >gb|EAT41962.1| AAEL006434-PA [Aedes aegypti]
AAEL007296-RB	Up in Y1	XM_021851258.1	XP_001652661	putative fatty acyl-CoA reductase CG8306 [Aedes aegypti] >ref|XP_021706950.1| putative fatty acyl-CoA reductase CG8306 [Aedes aegypti] >gb|EAT41033.1| AAEL007296-PA [Aedes aegypti]
AAEL003873-RC	Up in Y1	XM_021851074.1	XP_001664284	glycerol-3-phosphate dehydrogenase, mitochondrial isoform X1 [Aedes aegypti] >ref|XP_021706766.1| glycerol-3-phosphate dehydrogenase, mitochondrial isoform X1 [Aedes aegypti] >gb|EAT44797.1| AAEL003873-PB [Aedes aegypti]
AAEL021022-RA	Up in Y1	XM_021839124.1	XP_021694816	adenylate cyclase, terminal-differentiation specific [Aedes aegypti]
AAEL023706-RB	Up in Y1	XM_021854394.1	XP_021710086	ral guanine nucleotide dissociation stimulator-like 1 isoform X2 [Aedes aegypti]
AAEL008005-RC	Up in Y1	XM_021840550.1	XP_021696242	transcription factor hamlet isoform X1 [Aedes aegypti]
AAEL005003-RD	Up in Y1	XM_021849527.1	XP_001650167	CBL-interacting protein kinase 18 [Aedes aegypti] >ref|XP_021705217.1| CBL-interacting protein kinase 18 [Aedes aegypti] >ref|XP_021705218.1| CBL-interacting protein kinase 18 [Aedes aegypti] >ref|XP_021705219.1| CBL-interacting protein kinase 18 [Aedes aegypti] >ref|XP_021705220.1| CBL-interacting protein kinase 18 [Aedes aegypti] >ref|XP_021705221.1| CBL-interacting protein kinase 18 [Aedes aeg…
AAEL019461-RL	Up in Y1	XM_021847393.1	XP_021703085	protein timeless isoform X5 [Aedes aegypti]
AAEL005651-RB	Up in Y1	XM_021846860.1	XP_021702552	ethanolamine-phosphate cytidylyltransferase isoform X1 [Aedes aegypti]
AAEL006175-RB	Up in Y1	XM_021848838.1	XP_021704530	UPF0545 protein C22orf39 homolog isoform X2 [Aedes aegypti]
AAEL014363-RB	Up in Y1	XM_021853606.1	XP_021709298	uncharacterized protein LOC5564267 isoform X1 [Aedes aegypti]
AAEL018248-RN	Up in Y1	XM_021855158.1	XP_021710849	uncharacterized protein LOC5576761 isoform X4 [Aedes aegypti] >ref|XP_021710850.1| uncharacterized protein LOC5576761 isoform X4 [Aedes aegypti]
AAEL008056-RG	Up in Y1	XM_021844345.1	XP_021700037	uncharacterized protein LOC5569977 isoform X4 [Aedes aegypti]
AAEL014238-RD	Up in Y1	XM_001648214.2	XP_021702972	aromatic-L-amino-acid decarboxylase isoform X1 [Aedes aegypti]
AAEL023753-RC	Up in Y1	XM_021845965.1	XP_021701656	facilitated trehalose transporter Tret1-2 homolog [Aedes aegypti] >ref|XP_021701657.1| facilitated trehalose transporter Tret1-2 homolog [Aedes aegypti] >ref|XP_021701658.1| facilitated trehalose transporter Tret1-2 homolog [Aedes aegypti]
AAEL010109-RC	Up in Y1	XM_021840505.1	EAT37960	AAEL010109-PA [Aedes aegypti]
AAEL012395-RA	Up in Y1	XM_001662479.2	XP_001662529	multidrug resistance-associated protein 4 [Aedes aegypti] >ref|XP_021693721.1| multidrug resistance-associated protein 4 [Aedes aegypti] >gb|EAT35434.1| AAEL012395-PA [Aedes aegypti]
AAEL004025-RD	Up in Y1	XM_021854952.1	XP_021710644	glucose dehydrogenase [FAD, quinone] isoform X3 [Aedes aegypti] >ref|XP_021710645.1| glucose dehydrogenase [FAD, quinone] isoform X3 [Aedes aegypti]
AAEL019458-RA	Up in Y1	XM_021855708.1	XP_021711392	plasma membrane calcium-transporting ATPase 2 isoform X1 [Aedes aegypti] >ref|XP_021711393.1| plasma membrane calcium-transporting ATPase 2 isoform X1 [Aedes aegypti] >ref|XP_021711394.1| plasma membrane calcium-transporting ATPase 2 isoform X1 [Aedes aegypti] >ref|XP_021711395.1| plasma membrane calcium-transporting ATPase 2 isoform X1 [Aedes aegypti] >ref|XP_021711396.1| plasma membrane calcium…
AAEL020579-RA	Up in Y1	XM_001661140.2	XP_001661190	phenoloxidase 2 [Aedes aegypti]
AAEL005736-RB	Up in Y1	XM_001651333.2	XP_001651383	BUB3-interacting and GLEBS motif-containing protein ZNF207 isoform X2 [Aedes aegypti]
AAEL019820-RA	Up in Y1	XM_021850899.1	XP_021706591	beta-1-syntrophin [Aedes aegypti]
AAEL017462-RK	Up in Y1	XM_021839813.1	XP_021695504	hippocampus abundant transcript 1 protein isoform X6 [Aedes aegypti] >ref|XP_021695505.1| hippocampus abundant transcript 1 protein isoform X6 [Aedes aegypti]
AAEL004972-RI	Up in Y1	XM_021845196.1	XP_021700888	FK506-binding protein 5 isoform X4 [Aedes aegypti]
AAEL004277-RC	Up in Y1	XM_021845404.1	XP_021701096	metallophosphoesterase 1 isoform X3 [Aedes aegypti]
AAEL003318-RA	Up in Y1	XM_001663496.2	XP_001663546	peptide transporter family 1 [Aedes aegypti]
AAEL017334-RA	Up in Y1	XM_011494827.2	XP_011493129	flocculation protein FLO11 [Aedes aegypti]
AAEL000420-RB	Up in Y1	XM_001656411.2	XP_001656461	cathepsin O [Aedes aegypti] >gb|EAT48563.1| AAEL000420-PA [Aedes aegypti]
AAEL004341-RA	Up in Y1	XM_001648892.3	XP_001648942	esterase B1 [Aedes aegypti] >gb|EAT44289.1| AAEL004341-PA, partial [Aedes aegypti]
AAEL019862-RA	Up in Y1	XM_021841555.1	XP_021697247	uncharacterized protein LOC5577573 isoform X1 [Aedes aegypti]
AAEL007796-RA	Up in Y1	XM_001652871.3	XP_001652921	proclotting enzyme isoform X3 [Aedes aegypti] >gb|EAT40468.1| AAEL007796-PA [Aedes aegypti]
AAEL019845-RC	Up in Y1	XM_021850561.1	XP_021706252	uncharacterized protein LOC5577433 isoform X1 [Aedes aegypti] >ref|XP_021706253.1| uncharacterized protein LOC5577433 isoform X1 [Aedes aegypti]
AAEL008803-RB	Up in Y1	XM_021855982.1	XP_021711674	uncharacterized protein C1orf43 homolog isoform X1 [Aedes aegypti]
AAEL000488-RC	Up in Y1	XM_021851342.1	XP_021707032	interleukin-1 receptor accessory protein-like 1 [Aedes aegypti] >ref|XP_021707033.1| interleukin-1 receptor accessory protein-like 1 [Aedes aegypti] >ref|XP_021707034.1| interleukin-1 receptor accessory protein-like 1 [Aedes aegypti]
AAEL027330-RA	Up in Y1	XR_002500072.1	KXJ83512	hypothetical protein RP20_CCG005913 [Aedes albopictus]
AAEL002194-RA	Up in Y1	XM_001654880.2	XP_001654930	uricase [Aedes aegypti] >gb|ABV44610.1| urate oxidase [Aedes aegypti] >gb|EAT46590.1| AAEL002194-PA [Aedes aegypti] >gb|EAT46591.1| AAEL002194-PB [Aedes aegypti]
AAEL022695-RA	Up in Y1	XM_021844577.1	XP_021700269	uncharacterized protein LOC5576459 [Aedes aegypti]
AAEL002583-RA	Up in Y1	XM_001655680.2	XP_001655730	toll-like receptor 7 [Aedes aegypti] >gb|EAT46215.1| AAEL002583-PA [Aedes aegypti]
AAEL012575-RA	Up in Y1	XM_001662658.2	XP_001662708	putative defense protein 3 [Aedes aegypti]
AAEL019576-RG	Up in Y1	XM_021842371.1	XP_021698057	filamin-B isoform X1 [Aedes aegypti] >ref|XP_021698058.1| filamin-B isoform X1 [Aedes aegypti]
AAEL000967-RE	Up in Y1	XM_021852791.1	XP_021708478	transmembrane channel-like protein 7 [Aedes aegypti] >ref|XP_021708479.1| transmembrane channel-like protein 7 [Aedes aegypti] >ref|XP_021708480.1| transmembrane channel-like protein 7 [Aedes aegypti] >ref|XP_021708481.1| transmembrane channel-like protein 7 [Aedes aegypti] >ref|XP_021708483.1| transmembrane channel-like protein 7 [Aedes aegypti]
AAEL013229-RA	Up in Y1	XM_001663357.2	PBC29447	Tubulin alpha-1 chain [Apis cerana cerana]
AAEL001293-RD	Up in Y1	XM_021847998.1	XP_001653033	clavesin-1 [Aedes aegypti] >ref|XP_021703690.1| clavesin-1 [Aedes aegypti] >gb|AAK73352.1| CRALBP isoform 2 [Aedes aegypti] >gb|AAL85588.1| cellular retinaldehyde-binding protein [Aedes aegypti] >gb|AAL85591.1| cellular retinaldehyde-binding protein [Aedes aegypti] >gb|EAT47600.1| AAEL001293-PA [Aedes aegypti] >gb|EJY57370.1| AAEL001293-PB [Aedes aegypti]
AAEL015247-RC	Up in Y1	XM_021857248.1	XP_021712940	membrane alanyl aminopeptidase [Aedes aegypti] >ref|XP_021712941.1| membrane alanyl aminopeptidase [Aedes aegypti]
AAEL010893-RC	Up in Y1	XM_001654981.2	XP_001655031	carbonic anhydrase 2 [Aedes aegypti] >ref|XP_001655032.2| carbonic anhydrase 2 [Aedes aegypti]
AAEL019914-RE	Up in Y1	XM_021848205.1	XP_021703897	uncharacterized protein LOC5568178 isoform X2 [Aedes aegypti]
AAEL011624-RB	Up in Y1	XM_021847631.1	XP_021703323	serine protease snake isoform X1 [Aedes aegypti]
AAEL027385-RA	Up in Y1	XR_002502511.1	KXJ79417	hypothetical protein RP20_CCG000998 [Aedes albopictus]
AAEL004083-RA	Up in Y1	XM_001648388.2	XP_001648438	echinoderm microtubule-associated protein-like 2 isoform X2 [Aedes aegypti]
AAEL013812-RA	Up in Y1	XM_001663951.2	XP_001664001	location of vulva defective 1 [Aedes aegypti]
AAEL009850-RA	Up in Y1	XM_001660402.3	XP_001660452	uncharacterized protein LOC5572513 [Aedes aegypti] >gb|EAT38240.1| AAEL009850-PA [Aedes aegypti]
AAEL000902-RB	Up in Y1	XM_021855007.1	XP_001651636	organic cation transporter protein [Aedes aegypti] >ref|XP_021710699.1| organic cation transporter protein [Aedes aegypti] >gb|EAT48035.1| AAEL000902-PA [Aedes aegypti]
AAEL010596-RA	Up in Y1	XM_001654622.2	XP_001654672	polypeptide N-acetylgalactosaminyltransferase 16 [Aedes aegypti] >ref|XP_021693954.1| polypeptide N-acetylgalactosaminyltransferase 16 [Aedes aegypti]
AAEL010991-RA	Up in Y1	XM_001661225.2	XP_001661275	long-chain-fatty-acid--CoA ligase 4 isoform X2 [Aedes aegypti]
AAEL010782-RA	Up in Y1	XM_001654839.2	XP_001654889	zinc carboxypeptidase A 1 [Aedes aegypti] >gb|EAT37217.1| AAEL010782-PA [Aedes aegypti]
AAEL022720-RA	Up in Y1	XM_021842790.1	XP_021698482	uncharacterized transmembrane protein DDB_G0289901-like isoform X1 [Aedes aegypti]
AAEL015298-RE	Up in Y1	XM_021843235.1	XP_021698925	protein ABHD1 [Aedes aegypti] >ref|XP_021698926.1| protein ABHD1 [Aedes aegypti] >ref|XP_021698927.1| protein ABHD1 [Aedes aegypti] >ref|XP_021698928.1| protein ABHD1 [Aedes aegypti] >ref|XP_021698929.1| protein ABHD1 [Aedes aegypti] >gb|EAT32449.1| AAEL015298-PA [Aedes aegypti] >gb|EAT37296.1| AAEL010695-PA [Aedes aegypti]
AAEL008473-RA	Up in Y1	XM_001659222.2	XP_001659272	Golgi-associated plant pathogenesis-related protein 1 [Aedes aegypti] >gb|EAT39745.1| AAEL008473-PA [Aedes aegypti]
AAEL011980-RA	Up in Y1	XM_001655743.2	XP_001655793	uncharacterized protein LOC5575647 [Aedes aegypti] >gb|EAT33457.1| AAEL014268-PA [Aedes aegypti]
AAEL005289-RC	Up in Y1	XM_021848489.1	XP_001650687	ornithine aminotransferase, mitochondrial isoform X1 [Aedes aegypti] >ref|XP_021704181.1| ornithine aminotransferase, mitochondrial isoform X1 [Aedes aegypti] >gb|EAT43242.1| AAEL005289-PA [Aedes aegypti]
AAEL008742-RA	Up in Y1	XM_001653395.2	XP_001653445	transmembrane protein 53-A [Aedes aegypti] >ref|XP_021709453.1| transmembrane protein 53-A [Aedes aegypti] >gb|EAT39479.1| AAEL008742-PA [Aedes aegypti]
AAEL002978-RD	Up in Y1	XM_021837687.1	XP_001656227	putative aminopeptidase W07G4.4 [Aedes aegypti] >ref|XP_021693377.1| putative aminopeptidase W07G4.4 [Aedes aegypti] >ref|XP_021693378.1| putative aminopeptidase W07G4.4 [Aedes aegypti] >ref|XP_021693379.1| putative aminopeptidase W07G4.4 [Aedes aegypti]
AAEL024516-RA	Up in Y1	XM_021856098.1	XP_001661758	serine/threonine-protein kinase OSR1 [Aedes aegypti] >ref|XP_021711790.1| serine/threonine-protein kinase OSR1-like [Aedes aegypti] >gb|EAT36321.1| AAEL011578-PA [Aedes aegypti]
AAEL006642-RA	Up in Y1	XM_001652094.2	PBC29447	Tubulin alpha-1 chain [Apis cerana cerana]
AAEL012864-RA	Up in Y1	XM_001662970.2	XP_001663020	uncharacterized protein LOC5576923 [Aedes aegypti]
AAEL011242-RA	Up in Y1	XM_001661468.2	XP_001661518	UDP-glucose 6-dehydrogenase [Aedes aegypti] >gb|EAT36695.1| AAEL011242-PA [Aedes aegypti]
AAEL014821-RA	Up in Y1	XM_001649627.2	XP_001649677	flavin reductase (NADPH) [Aedes aegypti] >gb|EAT32941.1| AAEL014821-PA [Aedes aegypti]
AAEL006973-RB	Up in N1	XM_021847095.1	XP_001652436	uncharacterized protein LOC5568606 [Aedes aegypti] >ref|XP_021702787.1| uncharacterized protein LOC5568606 [Aedes aegypti] >ref|XP_021702788.1| uncharacterized protein LOC5568606 [Aedes aegypti] >gb|EAT41367.1| AAEL006973-PA [Aedes aegypti]
AAEL021471-RC	Up in N1	XM_021838605.1	XP_021694297	type I inositol 3,4-bisphosphate 4-phosphatase isoform X1 [Aedes aegypti] >ref|XP_021694305.1| type I inositol 3,4-bisphosphate 4-phosphatase isoform X1 [Aedes aegypti]
AAEL025469-RA	Up in N1	XM_021857027.1	XP_021712718	protein preli-like [Aedes aegypti] >ref|XP_021712719.1| protein preli-like [Aedes aegypti]
AAEL022462-RA	Up in N1	XM_021852651.1	XP_021708342	transcription factor E2f1 [Aedes aegypti] >ref|XP_021708343.1| transcription factor E2f1 [Aedes aegypti] >ref|XP_021708344.1| transcription factor E2f1 [Aedes aegypti] >ref|XP_021708345.1| transcription factor E2f1 [Aedes aegypti] >ref|XP_021708346.1| transcription factor E2f1 [Aedes aegypti]
AAEL003646-RD	Up in N1	XM_021853995.1	XP_021709687	probable basic-leucine zipper transcription factor J isoform X1 [Aedes aegypti]
AAEL017445-RD	Up in N1	XM_021848315.1	XP_021704007	protein nubbin isoform X2 [Aedes aegypti]
AAEL021076-RA	Up in N1	XR_002501765.1	not available	not available
AAEL025216-RD	Up in N1	XM_021847715.1	XP_021703407	signal-induced proliferation-associated 1-like protein 2 isoform X1 [Aedes aegypti] >ref|XP_021703408.1| signal-induced proliferation-associated 1-like protein 2 isoform X1 [Aedes aegypti] >ref|XP_021703409.1| signal-induced proliferation-associated 1-like protein 2 isoform X1 [Aedes aegypti] >ref|XP_021703411.1| signal-induced proliferation-associated 1-like protein 2 isoform X1 [Aedes aegypti]
AAEL007560-RC	Up in N1	XM_021844762.1	XP_021700454	glycoprotein-N-acetylgalactosamine 3-beta-galactosyltransferase 1 isoform X3 [Aedes aegypti]
AAEL008853-RE	Up in N1	XM_021844578.1	XP_021700270	choline/ethanolamine kinase isoform X5 [Aedes aegypti]
AAEL024912-RA	Up in N1	XM_021856820.1	XP_021712512	WD repeat-containing and planar cell polarity effector protein fritz-like [Aedes aegypti]
AAEL019732-RB	Up in N1	XR_002501941.1	XP_021707846	histone-lysine N-methyltransferase, H3 lysine-79 specific isoform X4 [Aedes aegypti] >ref|XP_021707847.1| histone-lysine N-methyltransferase, H3 lysine-79 specific isoform X4 [Aedes aegypti]
AAEL004875-RB	Up in N1	XM_021838111.1	XP_021693801	F-box only protein 11 [Aedes aegypti] >ref|XP_021693803.1| F-box only protein 11 [Aedes aegypti] >ref|XP_021693804.1| F-box only protein 11 [Aedes aegypti]
AAEL024913-RC	Up in N1	XM_021837371.1	EAT33931	AAEL013800-PA [Aedes aegypti]
AAEL005575-RA	Up in N1	XM_001651056.2	XP_001651106	transient-receptor-potential-like protein [Aedes aegypti]
AAEL019684-RA	Up in N1	XM_021838144.1	XP_021693836	uncharacterized protein LOC23687557 [Aedes aegypti]
AAEL018699-RL	Up in N1	XM_021840999.1	XP_021696691	uncharacterized protein LOC5576943 isoform X9 [Aedes aegypti]
AAEL022196-RA	Up in N1	XM_021841956.1	XP_021697648	glutamate receptor ionotropic, kainate 2 isoform X1 [Aedes aegypti]
AAEL021559-RA	Up in N1	XR_002500475.1	EAT38714	AAEL009425-PA [Aedes aegypti]
AAEL012536-RB	Up in N1	XM_021841353.1	EAT35281	AAEL012536-PA [Aedes aegypti]
AAEL005885-RA	Up in N1	XM_001651515.2	XP_001651565	arginyl-tRNA--protein transferase 1 isoform X1 [Aedes aegypti] >gb|EAT42618.1| AAEL005885-PA [Aedes aegypti]
AAEL006752-RA	Up in N1	XM_001652139.2	XP_001652189	UPF0489 protein C5orf22 homolog [Aedes aegypti] >gb|EAT41648.1| AAEL006752-PA [Aedes aegypti]
AAEL023003-RA	Up in N1	XR_002502526.1	XP_029718519	putative GPI-anchored protein pfl2 [Aedes albopictus] >ref|XP_029718520.1| putative GPI-anchored protein pfl2 [Aedes albopictus] >gb|KXJ76859.1| hypothetical protein RP20_CCG008818 [Aedes albopictus]
AAEL012940-RB	Up in N1	XM_001656257.2	XP_001656307	uncharacterized protein LOC5577021 isoform X1 [Aedes aegypti]
AAEL011898-RK	Up in N1	XM_021848028.1	XP_021703720	1-acyl-sn-glycerol-3-phosphate acyltransferase alpha [Aedes aegypti] >ref|XP_021703721.1| 1-acyl-sn-glycerol-3-phosphate acyltransferase alpha [Aedes aegypti] >ref|XP_021703722.1| 1-acyl-sn-glycerol-3-phosphate acyltransferase alpha [Aedes aegypti] >ref|XP_021703723.1| 1-acyl-sn-glycerol-3-phosphate acyltransferase alpha [Aedes aegypti] >ref|XP_021703724.1| 1-acyl-sn-glycerol-3-phosphate acyltran…
AAEL001433-RD	Up in N1	XM_021839259.1	XP_021694950	post-GPI attachment to proteins factor 2-like isoform X1 [Aedes aegypti] >ref|XP_021694951.1| post-GPI attachment to proteins factor 2-like isoform X1 [Aedes aegypti] >gb|EAT47821.1| AAEL001079-PA [Aedes aegypti]
AAEL011305-RC	Up in N1	XM_021840817.1	XP_021696507	G-protein coupled receptor GRL101 [Aedes aegypti] >ref|XP_021696509.1| G-protein coupled receptor GRL101 [Aedes aegypti]
AAEL009265-RC	Up in N1	XM_021845042.1	XP_021700734	uncharacterized protein LOC5571731 isoform X1 [Aedes aegypti] >ref|XP_021700735.1| uncharacterized protein LOC5571731 isoform X1 [Aedes aegypti]
AAEL002351-RB	Up in N1	XM_021843224.1	XP_021698916	probable ATP-dependent RNA helicase DDX17 isoform X2 [Aedes aegypti]
AAEL006309-RC	Up in N1	XM_021849388.1	XP_021705078	Golgi resident protein GCP60 [Aedes aegypti] >ref|XP_021705079.1| Golgi resident protein GCP60 [Aedes aegypti] >ref|XP_021705080.1| Golgi resident protein GCP60 [Aedes aegypti]
AAEL003899-RA	Up in N1	XM_001664237.2	XP_001664287	facilitated trehalose transporter Tret1 [Aedes aegypti] >ref|XP_021704952.1| facilitated trehalose transporter Tret1 [Aedes aegypti] >ref|XP_021704953.1| facilitated trehalose transporter Tret1 [Aedes aegypti] >gb|EAT44800.1| AAEL003899-PA [Aedes aegypti]
AAEL001304-RC	Up in N1	XM_021848010.1	XP_021703701	nuclear hormone receptor FTZ-F1 beta isoform X1 [Aedes aegypti] >ref|XP_021703702.1| nuclear hormone receptor FTZ-F1 beta isoform X1 [Aedes aegypti] >ref|XP_021703703.1| nuclear hormone receptor FTZ-F1 beta isoform X1 [Aedes aegypti] >ref|XP_021703704.1| nuclear hormone receptor FTZ-F1 beta isoform X1 [Aedes aegypti] >ref|XP_021703705.1| nuclear hormone receptor FTZ-F1 beta isoform X1 [Aedes aegy…
AAEL023752-RA	Up in N1	XR_002498769.1	not available	not available
AAEL009253-RB	Up in N1	XM_021845048.1	XP_021700740	uncharacterized protein LOC5571739 isoform X1 [Aedes aegypti]
AAEL023932-RA	Up in N1	XM_001651947.3	XP_001651997	opsin-1 [Aedes aegypti] >ref|XP_021712370.1| opsin-1-like [Aedes aegypti] >gb|EAT41931.1| AAEL006498-PA [Aedes aegypti]
AAEL026960-RC	Up in N1	XM_021838396.1	XP_021694088	uncharacterized membrane protein DDB_G0293934-like [Aedes aegypti] >ref|XP_021694092.1| uncharacterized membrane protein DDB_G0293934-like [Aedes aegypti] >ref|XP_021694097.1| uncharacterized membrane protein DDB_G0293934-like [Aedes aegypti]
AAEL012117-RC	Up in N1	XR_002500888.1	XP_021702947	mitochondrial carrier protein Rim2 [Aedes aegypti]
AAEL024022-RA	Up in N1	XM_021848177.1	XP_021703869	A-kinase anchor protein 10, mitochondrial [Aedes aegypti]
AAEL009114-RG	Up in N1	XM_021837271.1	NP_001345310	protein doublesex isoform 1 [Aedes aegypti] >ref|XP_021692958.1| protein doublesex isoform X1 [Aedes aegypti] >ref|XP_021692959.1| protein doublesex isoform X1 [Aedes aegypti] >ref|XP_021692960.1| protein doublesex isoform X1 [Aedes aegypti] >ref|XP_021692961.1| protein doublesex isoform X1 [Aedes aegypti] >ref|XP_021692962.1| protein doublesex isoform X1 [Aedes aegypti] >ref|XP_021692963.1| prot…
AAEL004791-RB	Up in N1	XM_001649766.2	XP_001649816	sorting nexin-13 isoform X1 [Aedes aegypti]
AAEL008262-RB	Up in N1	XM_021844489.1	XP_021700181	F-box/LRR-repeat protein 14 [Aedes aegypti]
AAEL028110-RG	Up in N1	XM_021852539.1	XP_021708225	disheveled-associated activator of morphogenesis 1 isoform X1 [Aedes aegypti]
AAEL011794-RA	Up in N1	XM_021855380.1	XP_021711072	uncharacterized protein LOC5576092 [Aedes aegypti] >ref|XP_021711073.1| uncharacterized protein LOC5576092 [Aedes aegypti] >gb|EAT36102.1| AAEL011794-PA [Aedes aegypti]
AAEL008760-RC	Up in N1	XM_021854869.1	XP_001659460	transmembrane protein 164 [Aedes aegypti] >ref|XP_021710560.1| transmembrane protein 164 [Aedes aegypti] >ref|XP_021710561.1| transmembrane protein 164 [Aedes aegypti] >gb|EAT39439.1| AAEL008760-PA [Aedes aegypti]
AAEL014519-RE	Up in N1	XM_021841125.1	XP_021696817	E3 ubiquitin-protein ligase CBL-B isoform X2 [Aedes aegypti]
AAEL009744-RB	Up in N1	XM_021854462.1	XP_001660317	uncharacterized protein LOC5572359 [Aedes aegypti] >ref|XP_021710154.1| uncharacterized protein LOC5572359 [Aedes aegypti] >gb|EAT38343.1| AAEL009744-PA [Aedes aegypti]
AAEL008556-RB	Up in N1	XM_021842906.1	XP_021698598	serine/threonine-protein kinase PRP4 homolog isoform X2 [Aedes aegypti]
AAEL002814-RA	Up in N1	XM_001662421.2	XP_001662471	uncharacterized protein LOC5576125 [Aedes aegypti]
AAEL014406-RB	Up in N1	XM_021838060.1	XP_001648712	PR domain zinc finger protein 5 [Aedes aegypti] >ref|XP_021693752.1| PR domain zinc finger protein 5 [Aedes aegypti]
AAEL027400-RE	Up in N1	XM_021850120.1	XP_021705810	uncharacterized protein LOC5565978 [Aedes aegypti] >ref|XP_021705811.1| uncharacterized protein LOC5565978 [Aedes aegypti] >ref|XP_021705812.1| uncharacterized protein LOC5565978 [Aedes aegypti] >ref|XP_021705813.1| uncharacterized protein LOC5565978 [Aedes aegypti] >ref|XP_021705814.1| uncharacterized protein LOC5565978 [Aedes aegypti] >ref|XP_021705815.1| uncharacterized protein LOC5565978 [Aed…
AAEL019557-RA	Up in N1	XM_021838133.1	XP_021693825	zinc finger protein OZF [Aedes aegypti]
AAEL027066-RA	Up in N1	XM_021850791.1	XP_021706483	phospholipase D1 [Aedes aegypti]
AAEL021519-RH	Up in N1	XM_021855237.1	XP_021710923	microprocessor complex subunit DGCR8 [Aedes aegypti] >ref|XP_021710924.1| microprocessor complex subunit DGCR8 [Aedes aegypti] >ref|XP_021710925.1| microprocessor complex subunit DGCR8 [Aedes aegypti] >ref|XP_021710926.1| microprocessor complex subunit DGCR8 [Aedes aegypti] >ref|XP_021710927.1| microprocessor complex subunit DGCR8 [Aedes aegypti] >ref|XP_021710928.1| microprocessor complex subuni…
AAEL000185-RD	Up in N1	XM_021852886.1	XP_001658942	eukaryotic translation initiation factor 5 [Aedes aegypti] >ref|XP_021708576.1| eukaryotic translation initiation factor 5 [Aedes aegypti] >ref|XP_021708577.1| eukaryotic translation initiation factor 5 [Aedes aegypti] >ref|XP_021708578.1| eukaryotic translation initiation factor 5 [Aedes aegypti] >gb|EAT48834.1| AAEL000185-PA [Aedes aegypti]
AAEL010027-RB	Up in N1	XM_021841930.1	XP_001660574	SEC14-like protein 2 [Aedes aegypti] >ref|XP_021697622.1| SEC14-like protein 2 [Aedes aegypti] >ref|XP_021697623.1| SEC14-like protein 2 [Aedes aegypti] >ref|XP_021697624.1| SEC14-like protein 2 [Aedes aegypti] >ref|XP_021697625.1| SEC14-like protein 2 [Aedes aegypti] >ref|XP_021697626.1| SEC14-like protein 2 [Aedes aegypti] >ref|XP_021697627.1| SEC14-like protein 2 [Aedes aegypti] >ref|XP_021697…
AAEL005400-RJ	Up in N1	XM_021837411.1	XP_021693097	C-terminal-binding protein isoform X1 [Aedes aegypti] >ref|XP_021693099.1| C-terminal-binding protein isoform X1 [Aedes aegypti] >ref|XP_021693100.1| C-terminal-binding protein isoform X1 [Aedes aegypti] >ref|XP_021693101.1| C-terminal-binding protein isoform X1 [Aedes aegypti] >ref|XP_021693102.1| C-terminal-binding protein isoform X1 [Aedes aegypti] >ref|XP_021693103.1| C-terminal-binding prote…
AAEL006539-RF	Up in N1	XM_021840929.1	XP_021696615	serine/threonine-protein kinase 3 [Aedes aegypti] >ref|XP_021696617.1| serine/threonine-protein kinase 3 [Aedes aegypti] >ref|XP_021696618.1| serine/threonine-protein kinase 3 [Aedes aegypti] >ref|XP_021696619.1| serine/threonine-protein kinase 3 [Aedes aegypti] >ref|XP_021696620.1| serine/threonine-protein kinase 3 [Aedes aegypti] >ref|XP_021696621.1| serine/threonine-protein kinase 3 [Aedes aeg…
AAEL011216-RD	Up in N1	XM_021843571.1	XP_021699261	type 1 phosphatidylinositol 4,5-bisphosphate 4-phosphatase [Aedes aegypti] >ref|XP_021699262.1| type 1 phosphatidylinositol 4,5-bisphosphate 4-phosphatase [Aedes aegypti] >ref|XP_021699263.1| type 1 phosphatidylinositol 4,5-bisphosphate 4-phosphatase [Aedes aegypti] >ref|XP_021699264.1| type 1 phosphatidylinositol 4,5-bisphosphate 4-phosphatase [Aedes aegypti] >ref|XP_021699265.1| type 1 phosphat…
AAEL012595-RE	Up in N1	XM_021839098.1	XP_021694789	uncharacterized protein LOC5576540 isoform X2 [Aedes aegypti] >ref|XP_021694790.1| uncharacterized protein LOC5576540 isoform X2 [Aedes aegypti] >ref|XP_021694791.1| uncharacterized protein LOC5576540 isoform X2 [Aedes aegypti] >ref|XP_021694792.1| uncharacterized protein LOC5576540 isoform X2 [Aedes aegypti] >ref|XP_021694793.1| uncharacterized protein LOC5576540 isoform X2 [Aedes aegypti] >ref|…
AAEL009131-RA	Up in N1	XM_001653640.3	XP_001653690	cytochrome P450 6d3 [Aedes aegypti] >gb|EAT39047.1| AAEL009131-PA [Aedes aegypti]
AAEL017160-RC	Up in N1	XM_021837324.1	XP_021693015	probable G-protein coupled receptor Mth-like 1 [Aedes aegypti] >ref|XP_021693016.1| probable G-protein coupled receptor Mth-like 1 [Aedes aegypti]
AAEL010783-RD	Up in N1	XM_021845584.1	XP_001654893	sodium/potassium-transporting ATPase subunit beta-2 [Aedes aegypti] >ref|XP_021701274.1| sodium/potassium-transporting ATPase subunit beta-2 [Aedes aegypti] >ref|XP_021701275.1| sodium/potassium-transporting ATPase subunit beta-2 [Aedes aegypti] >ref|XP_021701276.1| sodium/potassium-transporting ATPase subunit beta-2 [Aedes aegypti] >gb|EAT37221.1| AAEL010783-PA [Aedes aegypti]

## Sheet: N7N1
Gene	Expression	Nucleotide	Protein	Description
AAEL006264-RC	Up in N7	XM_021844094.1	XP_021699786	solute carrier family 2, facilitated glucose transporter member 3 isoform X2 [Aedes aegypti]
AAEL004480-RG	Up in N7	XM_021854901.1	XP_001649222	fizzy-related protein homolog [Aedes aegypti] >ref|XP_021710587.1| fizzy-related protein homolog [Aedes aegypti] >ref|XP_021710589.1| fizzy-related protein homolog [Aedes aegypti] >ref|XP_021710590.1| fizzy-related protein homolog [Aedes aegypti] >ref|XP_021710591.1| fizzy-related protein homolog [Aedes aegypti] >ref|XP_021710592.1| fizzy-related protein homolog [Aedes aegypti] >ref|XP_021710593.…
AAEL019686-RB	Up in N7	XM_021838488.1	XP_021694178	uncharacterized protein LOC5564410 [Aedes aegypti] >ref|XP_021694179.1| uncharacterized protein LOC5564410 [Aedes aegypti] >ref|XP_021694180.1| uncharacterized protein LOC5564410 [Aedes aegypti]
AAEL011254-RE	Up in N7	XM_021857682.1	XP_021694782	uncharacterized protein LOC5576540 isoform X1 [Aedes aegypti] >ref|XP_021694783.1| uncharacterized protein LOC5576540 isoform X1 [Aedes aegypti] >ref|XP_021694784.1| uncharacterized protein LOC5576540 isoform X1 [Aedes aegypti] >ref|XP_021694785.1| uncharacterized protein LOC5576540 isoform X1 [Aedes aegypti] >ref|XP_021694786.1| uncharacterized protein LOC5576540 isoform X1 [Aedes aegypti] >ref|…
AAEL002636-RA	Up in N7	XM_001661910.2	XP_021694624	uncharacterized protein LOC5574328 isoform X12 [Aedes aegypti] >ref|XP_021694625.1| uncharacterized protein LOC5574328 isoform X12 [Aedes aegypti] >ref|XP_021694626.1| uncharacterized protein LOC5574328 isoform X12 [Aedes aegypti] >ref|XP_021694627.1| uncharacterized protein LOC5574328 isoform X12 [Aedes aegypti] >ref|XP_021694628.1| uncharacterized protein LOC5574328 isoform X12 [Aedes aegypti] …
AAEL013492-RA	Up in N7	XM_001663638.3	XP_001663688	phenoloxidase 2 [Aedes aegypti] >ref|XP_021699380.1| phenoloxidase 2 [Aedes aegypti]
AAEL013128-RI	Up in N7	XM_021843292.1	EAT34657	AAEL013128-PA [Aedes aegypti]
AAEL019737-RD	Up in N7	XM_021838820.1	XP_021694498	disks large 1 tumor suppressor protein isoform X1 [Aedes aegypti] >ref|XP_021694499.1| disks large 1 tumor suppressor protein isoform X1 [Aedes aegypti] >ref|XP_021694500.1| disks large 1 tumor suppressor protein isoform X1 [Aedes aegypti] >ref|XP_021694501.1| disks large 1 tumor suppressor protein isoform X1 [Aedes aegypti]
AAEL006973-RA	Up in N7	XM_001652386.2	XP_001652436	uncharacterized protein LOC5568606 [Aedes aegypti] >ref|XP_021702787.1| uncharacterized protein LOC5568606 [Aedes aegypti] >ref|XP_021702788.1| uncharacterized protein LOC5568606 [Aedes aegypti] >gb|EAT41367.1| AAEL006973-PA [Aedes aegypti]
AAEL017462-RK	Up in N7	XM_021839813.1	XP_021695504	hippocampus abundant transcript 1 protein isoform X6 [Aedes aegypti] >ref|XP_021695505.1| hippocampus abundant transcript 1 protein isoform X6 [Aedes aegypti]
AAEL007765-RE	Up in N7	XM_021844046.1	XP_021699738	serine protease inhibitor 42Dd isoform X1 [Aedes aegypti]
AAEL004688-RB	Up in N7	XM_021846074.1	XP_021710403	tyrosine-protein phosphatase 99A isoform X3 [Aedes aegypti] >ref|XP_021710414.1| tyrosine-protein phosphatase 99A isoform X3 [Aedes aegypti] >ref|XP_021710424.1| tyrosine-protein phosphatase 99A isoform X3 [Aedes aegypti] >ref|XP_021710433.1| tyrosine-protein phosphatase 99A isoform X3 [Aedes aegypti] >ref|XP_021710438.1| tyrosine-protein phosphatase 99A isoform X3 [Aedes aegypti] >ref|XP_0217104…
AAEL006226-RB	Up in N7	XM_021840813.1	XP_001657595	deoxynucleoside triphosphate triphosphohydrolase SAMHD1 [Aedes aegypti] >ref|XP_021696505.1| deoxynucleoside triphosphate triphosphohydrolase SAMHD1 [Aedes aegypti]
AAEL006274-RC	Up in N7	XM_021844098.1	XP_021699790	solute carrier family 2, facilitated glucose transporter member 1 isoform X3 [Aedes aegypti]
AAEL026050-RA	Up in N7	XR_002499494.1	not available	not available
AAEL006436-RF	Up in N7	XM_021847858.1	XP_001661247	protein TIS11 [Aedes aegypti] >ref|XP_021707483.1| protein TIS11 [Aedes aegypti] >ref|XP_021707484.1| protein TIS11 [Aedes aegypti] >ref|XP_021707485.1| protein TIS11 [Aedes aegypti] >ref|XP_021707486.1| protein TIS11 [Aedes aegypti]
AAEL004559-RC	Up in N7	XM_021849802.1	XP_029733692	synaptosomal-associated protein 25 isoform X2 [Aedes albopictus]
AAEL012412-RA	Up in N7	XM_021842433.1	EAT35420	AAEL012412-PA [Aedes aegypti]
AAEL002877-RC	Up in N7	XM_021837615.1	XP_021698647	uncharacterized protein LOC110676161 [Aedes aegypti]
AAEL010661-RH	Up in N7	XM_021842513.1	EAT35825	AAEL012041-PA [Aedes aegypti]
AAEL026050-RA	Up in N7	XR_002499494.1	not available	not available
AAEL005187-RB	Up in N7	XM_021839660.1	XP_001650503	laminin subunit gamma-1 [Aedes aegypti] >ref|XP_021695352.1| laminin subunit gamma-1 [Aedes aegypti] >ref|XP_021695353.1| laminin subunit gamma-1 [Aedes aegypti]
AAEL009863-RG	Up in N7	XM_021843012.1	XP_001654053	protein I'm not dead yet [Aedes aegypti] >ref|XP_021698700.1| protein I'm not dead yet [Aedes aegypti] >ref|XP_021698701.1| protein I'm not dead yet [Aedes aegypti] >ref|XP_021698702.1| protein I'm not dead yet [Aedes aegypti] >ref|XP_021698703.1| protein I'm not dead yet [Aedes aegypti] >ref|XP_021698704.1| protein I'm not dead yet [Aedes aegypti] >gb|EAT38219.1| AAEL009863-PA [Aedes aegypti] >g…
AAEL024689-RA	Up in N7	XM_021856856.1	XP_021697940	kinesin-like protein KIN-7O [Aedes aegypti] >ref|XP_021697941.1| kinesin-like protein KIN-7O [Aedes aegypti] >ref|XP_021697942.1| kinesin-like protein KIN-7O [Aedes aegypti]
AAEL011142-RF	Up in N7	XM_021839981.1	XP_021695672	uncharacterized protein LOC5576746 isoform X4 [Aedes aegypti] >ref|XP_021695673.1| uncharacterized protein LOC5576746 isoform X4 [Aedes aegypti]
AAEL020424-RB	Up in N7	XM_021840056.1	XP_021695748	uncharacterized protein LOC110675359 isoform X1 [Aedes aegypti]
AAEL012911-RB	Up in N7	XM_021853047.1	XP_001663048	leucine-rich repeat-containing protein let-4 isoform X1 [Aedes aegypti]
AAEL002887-RG	Up in N7	XM_021844850.1	XP_021700542	armadillo segment polarity protein isoform X5 [Aedes aegypti]
AAEL012062-RI	Up in N7	XM_021837809.1	XP_029733758	sodium/potassium-transporting ATPase subunit alpha isoform X4 [Aedes albopictus]
AAEL019649-RA	Up in N7	XM_021847770.1	XP_021703462	cell death abnormality protein 1 isoform X2 [Aedes aegypti]
AAEL017356-RF	Up in N7	XM_021841473.1	XP_021697165	uncharacterized protein LOC5571052 isoform X2 [Aedes aegypti]
AAEL004680-RB	Up in N7	XM_021851741.1	XP_021707433	BICD family-like cargo adapter 2 isoform X1 [Aedes aegypti]
AAEL008686-RD	Up in N7	XM_021845804.1	XP_021701494	serine-rich adhesin for platelets isoform X1 [Aedes aegypti]
AAEL004083-RB	Up in N7	XM_021855596.1	XP_021711288	echinoderm microtubule-associated protein-like 2 isoform X1 [Aedes aegypti] >ref|XP_021711289.1| echinoderm microtubule-associated protein-like 2 isoform X1 [Aedes aegypti] >ref|XP_021711290.1| echinoderm microtubule-associated protein-like 2 isoform X1 [Aedes aegypti] >ref|XP_021711291.1| echinoderm microtubule-associated protein-like 2 isoform X1 [Aedes aegypti] >ref|XP_021711292.1| echinoderm …
AAEL013458-RF	Up in N7	XM_021857331.1	XP_001656718	glutamine synthetase 2 cytoplasmic isoform X2 [Aedes aegypti] >gb|EAT34276.1| AAEL013458-PC [Aedes aegypti]
AAEL006181-RA	Up in N7	XM_001651775.2	XP_001651825	fatty-acid amide hydrolase 2-B isoform X1 [Aedes aegypti] >gb|EAT42271.1| AAEL006181-PA [Aedes aegypti]
AAEL013756-RF	Up in N7	XM_021849785.1	XP_021705473	zinc transporter ZIP1 isoform X1 [Aedes aegypti] >ref|XP_021705474.1| zinc transporter ZIP1 isoform X1 [Aedes aegypti] >ref|XP_021705475.1| zinc transporter ZIP1 isoform X1 [Aedes aegypti] >ref|XP_021705476.1| zinc transporter ZIP1 isoform X1 [Aedes aegypti] >ref|XP_021705477.1| zinc transporter ZIP1 isoform X1 [Aedes aegypti] >ref|XP_021705478.1| zinc transporter ZIP1 isoform X1 [Aedes aegypti]
AAEL024141-RD	Up in N7	XM_021848242.1	XP_021703934	paired amphipathic helix protein Sin3a isoform X1 [Aedes aegypti] >ref|XP_021703935.1| paired amphipathic helix protein Sin3a isoform X1 [Aedes aegypti] >ref|XP_021703936.1| paired amphipathic helix protein Sin3a isoform X1 [Aedes aegypti] >ref|XP_021703937.1| paired amphipathic helix protein Sin3a isoform X1 [Aedes aegypti] >ref|XP_021703938.1| paired amphipathic helix protein Sin3a isoform X1 […
AAEL013402-RD	Up in N7	XM_001663539.2	XP_001663589	E3 ubiquitin-protein ligase Mdm2 isoform X1 [Aedes aegypti]
AAEL004938-RB	Up in N7	XM_021844880.1	XP_021700571	uncharacterized protein LOC5565682 [Aedes aegypti] >ref|XP_021700572.1| uncharacterized protein LOC5565682 [Aedes aegypti] >gb|EAT43646.1| AAEL004938-PA [Aedes aegypti]
AAEL019495-RD	Up in N7	XM_021847439.1	XP_021703131	uncharacterized protein LOC5571525 isoform X4 [Aedes aegypti]
AAEL024532-RD	Up in N7	XM_021840820.1	XP_021696512	protein artichoke isoform X3 [Aedes aegypti]
AAEL025140-RA	Up in N7	XM_021838438.1	EAT36216	AAEL011699-PA [Aedes aegypti]
AAEL022720-RA	Up in N7	XM_021842790.1	XP_021698482	uncharacterized transmembrane protein DDB_G0289901-like isoform X1 [Aedes aegypti]
AAEL006485-RE	Up in N7	XM_001651929.2	XP_001651977	probable uridine nucleosidase 1 [Aedes aegypti] >ref|XP_001651979.1| probable uridine nucleosidase 1 [Aedes aegypti] >gb|EAT41911.1| AAEL006485-PA [Aedes aegypti] >gb|EAT41912.1| AAEL006485-PC [Aedes aegypti] >gb|EAT41913.1| AAEL006485-PB [Aedes aegypti]
AAEL027182-RA	Up in N7	XR_002500709.1	XP_021695748	uncharacterized protein LOC110675359 isoform X1 [Aedes aegypti]
AAEL027069-RE	Up in N7	XM_021857586.1	XP_021713278	uncharacterized protein LOC5564154 isoform X1 [Aedes aegypti] >ref|XP_021713282.1| uncharacterized protein LOC5564154 isoform X1 [Aedes aegypti] >ref|XP_021713285.1| uncharacterized protein LOC5564154 isoform X1 [Aedes aegypti] >ref|XP_021713292.1| uncharacterized protein LOC5564154 isoform X1 [Aedes aegypti] >gb|EAT33392.1| AAEL014332-PA [Aedes aegypti]
AAEL005221-RF	Up in N7	XM_021854594.1	XP_001650545	leucine-rich repeat-containing protein 58 [Aedes aegypti] >ref|XP_021710285.1| leucine-rich repeat-containing protein 58 [Aedes aegypti] >ref|XP_021710286.1| leucine-rich repeat-containing protein 58 [Aedes aegypti] >ref|XP_021710288.1| leucine-rich repeat-containing protein 58 [Aedes aegypti] >ref|XP_021710289.1| leucine-rich repeat-containing protein 58 [Aedes aegypti] >gb|EAT43344.1| AAEL00522…
AAEL019812-RD	Up in N7	XM_021855367.1	XP_021711059	uncharacterized protein LOC5564138 isoform X1 [Aedes aegypti]
AAEL017012-RI	Up in N7	XM_021845621.1	XP_021701312	fibrous sheath CABYR-binding protein isoform X4 [Aedes aegypti]
AAEL004351-RG	Up in N7	XM_021853318.1	XP_021709010	casein kinase I isoform X1 [Aedes aegypti]
AAEL019444-RB	Up in N7	XM_021849993.1	XP_021705682	maternal protein pumilio isoform X1 [Aedes aegypti] >ref|XP_021705683.1| maternal protein pumilio isoform X1 [Aedes aegypti]
AAEL020000-RA	Up in N7	XM_021855866.1	XP_021711558	uncharacterized protein LOC5572217 [Aedes aegypti]
AAEL026633-RI	Up in N7	XM_021845856.1	XP_021701545	mediator of RNA polymerase II transcription subunit 13 isoform X1 [Aedes aegypti] >ref|XP_021701546.1| mediator of RNA polymerase II transcription subunit 13 isoform X1 [Aedes aegypti] >ref|XP_021701547.1| mediator of RNA polymerase II transcription subunit 13 isoform X1 [Aedes aegypti] >ref|XP_021701548.1| mediator of RNA polymerase II transcription subunit 13 isoform X1 [Aedes aegypti] >ref|XP_…
AAEL000949-RG	Up in N7	XM_021852454.1	XP_021708142	macoilin-2 [Aedes aegypti] >ref|XP_021708143.1| macoilin-2 [Aedes aegypti] >ref|XP_021708144.1| macoilin-2 [Aedes aegypti] >ref|XP_021708145.1| macoilin-2 [Aedes aegypti] >ref|XP_021708146.1| macoilin-2 [Aedes aegypti] >ref|XP_021708147.1| macoilin-2 [Aedes aegypti] >ref|XP_021708148.1| macoilin-2 [Aedes aegypti] >ref|XP_021708149.1| macoilin-2 [Aedes aegypti]
AAEL010300-RB	Up in N7	XM_021848635.1	XP_021704327	uncharacterized protein LOC5573210 isoform X1 [Aedes aegypti]
AAEL018032-RH	Up in N7	XM_021844582.1	XP_021700274	uncharacterized protein KIAA1109 isoform X2 [Aedes aegypti]
AAEL000643-RG	Up in N7	XM_021854845.1	XP_021710531	zinc finger protein 436 [Aedes aegypti] >ref|XP_021710532.1| zinc finger protein 436 [Aedes aegypti] >ref|XP_021710533.1| zinc finger protein 436 [Aedes aegypti] >ref|XP_021710534.1| zinc finger protein 436 [Aedes aegypti] >ref|XP_021710535.1| zinc finger protein 436 [Aedes aegypti] >ref|XP_021710536.1| zinc finger protein 436 [Aedes aegypti] >ref|XP_021710537.1| zinc finger protein 436 [Aedes ae…
AAEL001532-RD	Up in N7	XM_021850476.1	XP_001659550	protein yippee-like CG15309 isoform X1 [Aedes aegypti] >ref|XP_021706166.1| protein yippee-like CG15309 isoform X1 [Aedes aegypti] >ref|XP_021706167.1| protein yippee-like CG15309 isoform X1 [Aedes aegypti] >ref|XP_021706168.1| protein yippee-like CG15309 isoform X1 [Aedes aegypti] >ref|XP_021706169.1| protein yippee-like CG15309 isoform X1 [Aedes aegypti] >ref|XP_021706170.1| protein yippee-like…
AAEL019751-RD	Up in N7	XM_021853302.1	XP_021708993	uncharacterized protein LOC5571127 isoform X1 [Aedes aegypti] >ref|XP_021708994.1| uncharacterized protein LOC5571127 isoform X1 [Aedes aegypti]
AAEL009458-RF	Up in N7	XM_021855575.1	XP_001660092	syntaxin-4 isoform X1 [Aedes aegypti] >ref|XP_021711075.1| syntaxin-4 isoform X1 [Aedes aegypti] >gb|EAT38669.1| AAEL009458-PA [Aedes aegypti]
AAEL007026-RB	Up in N7	XM_021844621.1	XP_021700313	glutathione S-transferase C-terminal domain-containing protein homolog isoform X1 [Aedes aegypti] >ref|XP_021700314.1| glutathione S-transferase C-terminal domain-containing protein homolog isoform X1 [Aedes aegypti]
AAEL024235-RD	Up in N7	XM_021840788.1	XP_021696480	talin-2 isoform X1 [Aedes aegypti] >ref|XP_021696481.1| talin-2 isoform X1 [Aedes aegypti] >ref|XP_021696482.1| talin-2 isoform X1 [Aedes aegypti] >ref|XP_021696483.1| talin-2 isoform X1 [Aedes aegypti]
AAEL008234-RF	Up in N7	XM_021853444.1	XP_021709132	segment polarity protein dishevelled isoform X1 [Aedes aegypti] >ref|XP_021709133.1| segment polarity protein dishevelled isoform X1 [Aedes aegypti]
AAEL001796-RD	Up in N7	XM_021846775.1	XP_001660403	nuclear hormone receptor HR78 isoform X1 [Aedes aegypti] >ref|XP_021702464.1| nuclear hormone receptor HR78 isoform X1 [Aedes aegypti] >gb|EAT47063.1| AAEL001796-PA [Aedes aegypti]
AAEL013466-RG	Up in N7	XM_021846276.1	XP_021701968	ankyrin-2 isoform X6 [Aedes aegypti]
AAEL021092-RI	Up in N7	XM_021853928.1	XP_021709620	LIM domain-binding protein 2 isoform X2 [Aedes aegypti]
AAEL022364-RB	Up in N7	XM_021851358.1	XP_021707050	uncharacterized protein LOC5571112 isoform X2 [Aedes aegypti]
AAEL007092-RB	Up in N7	XM_021842353.1	XP_001658122	putative phospholipase B-like lamina ancestor [Aedes aegypti] >ref|XP_021698045.1| putative phospholipase B-like lamina ancestor [Aedes aegypti] >ref|XP_021698046.1| putative phospholipase B-like lamina ancestor [Aedes aegypti] >ref|XP_021698047.1| putative phospholipase B-like lamina ancestor [Aedes aegypti] >ref|XP_021698048.1| putative phospholipase B-like lamina ancestor [Aedes aegypti] >gb|E…
AAEL010095-RF	Up in N7	XM_001654192.2	XP_001654241	small integral membrane protein 14 [Aedes aegypti] >ref|XP_001654242.1| small integral membrane protein 14 [Aedes aegypti] >ref|XP_001654243.1| small integral membrane protein 14 [Aedes aegypti] >gb|ABF18072.1| conserved protein, partial [Aedes aegypti] >gb|EAT37964.1| AAEL010095-PB [Aedes aegypti] >gb|EAT37965.1| AAEL010095-PC [Aedes aegypti] >gb|EAT37966.1| AAEL010095-PA [Aedes aegypti]
AAEL025570-RE	Up in N7	XM_021845424.1	XP_021701109	myosin-IA [Aedes aegypti] >ref|XP_021701110.1| myosin-IA [Aedes aegypti] >ref|XP_021701112.1| myosin-IA [Aedes aegypti] >ref|XP_021701113.1| myosin-IA [Aedes aegypti] >ref|XP_021701114.1| myosin-IA [Aedes aegypti] >ref|XP_021701115.1| myosin-IA [Aedes aegypti] >ref|XP_021701116.1| myosin-IA [Aedes aegypti] >ref|XP_021701117.1| myosin-IA [Aedes aegypti]
AAEL000845-RH	Up in N7	XM_021854771.1	XP_021710456	phosphatidylinositol phosphatase PTPRQ [Aedes aegypti] >ref|XP_021710457.1| phosphatidylinositol phosphatase PTPRQ [Aedes aegypti] >ref|XP_021710458.1| phosphatidylinositol phosphatase PTPRQ [Aedes aegypti] >ref|XP_021710459.1| phosphatidylinositol phosphatase PTPRQ [Aedes aegypti] >ref|XP_021710460.1| phosphatidylinositol phosphatase PTPRQ [Aedes aegypti] >ref|XP_021710461.1| phosphatidylinosito…
AAEL027364-RA	Up in N7	XM_021852469.1	EAT39969	AAEL008259-PA [Aedes aegypti]
AAEL009173-RI	Up in N7	XM_021848464.1	XP_021704154	fasciclin-2 isoform X7 [Aedes aegypti] >ref|XP_021704155.1| fasciclin-2 isoform X7 [Aedes aegypti] >ref|XP_021704156.1| fasciclin-2 isoform X7 [Aedes aegypti] >ref|XP_021704157.1| fasciclin-2 isoform X7 [Aedes aegypti]
AAEL021711-RE	Up in N7	XM_021857181.1	XP_021712873	vacuolar protein sorting-associated protein 4A isoform X3 [Aedes aegypti]
AAEL019982-RA	Up in N7	XM_021854122.1	XP_021709814	probable Ras GTPase-activating protein isoform X4 [Aedes aegypti] >ref|XP_021709816.1| probable Ras GTPase-activating protein isoform X4 [Aedes aegypti] >ref|XP_021709817.1| probable Ras GTPase-activating protein isoform X4 [Aedes aegypti] >ref|XP_021709818.1| probable Ras GTPase-activating protein isoform X4 [Aedes aegypti]
AAEL007147-RB	Up in N7	XM_001658110.2	XP_001658160	uncharacterized protein LOC5568794 [Aedes aegypti] >ref|XP_021703165.1| uncharacterized protein LOC5568794 [Aedes aegypti] >ref|XP_021703166.1| uncharacterized protein LOC5568794 [Aedes aegypti]
AAEL009588-RH	Up in N7	XM_021846404.1	XP_021702096	probable nuclear hormone receptor HR3 isoform X4 [Aedes aegypti] >ref|XP_021702097.1| probable nuclear hormone receptor HR3 isoform X4 [Aedes aegypti]
AAEL028110-RA	Up in N7	XM_021852535.1	XP_021708227	disheveled-associated activator of morphogenesis 1 isoform X3 [Aedes aegypti]
AAEL006341-RB	Up in N7	XR_002502665.1	EAT42074	AAEL006341-PA [Aedes aegypti]
AAEL012000-RA	Up in N7	XM_001662090.2	XP_021707973	probable peptide chain release factor C12orf65, mitochondrial [Aedes aegypti] >gb|EAT34024.1| AAEL013711-PA [Aedes aegypti] >gb|EAT35857.1| AAEL012009-PA [Aedes aegypti]
AAEL008928-RF	Up in N7	XR_002501615.1	XP_021707006	G protein-activated inward rectifier potassium channel 3 isoform X4 [Aedes aegypti] >gb|AIN76712.1| Kir2A-a [Aedes aegypti] >gb|EAT39256.1| AAEL008928-PC [Aedes aegypti]
AAEL027514-RA	Up in N7	XM_021853618.1	XP_021709310	uncharacterized protein LOC110679302 isoform X1 [Aedes aegypti]
AAEL013959-RB	Up in N7	XM_021857305.1	XP_021698647	uncharacterized protein LOC110676161 [Aedes aegypti]
AAEL019673-RB	Up in N7	XM_021850626.1	XP_021706317	potassium channel subfamily K member 18 isoform X1 [Aedes aegypti] >ref|XP_021706318.1| potassium channel subfamily K member 18 isoform X1 [Aedes aegypti]
AAEL027483-RG	Up in N7	XM_021847193.1	XP_021702884	tyrosine-protein phosphatase non-receptor type 21 isoform X1 [Aedes aegypti] >ref|XP_021702885.1| tyrosine-protein phosphatase non-receptor type 21 isoform X1 [Aedes aegypti] >ref|XP_021702886.1| tyrosine-protein phosphatase non-receptor type 21 isoform X1 [Aedes aegypti] >ref|XP_021702887.1| tyrosine-protein phosphatase non-receptor type 21 isoform X1 [Aedes aegypti] >ref|XP_021702888.1| tyrosin…
AAEL001119-RC	Up in N7	XM_021854404.1	XP_021710096	DNA-binding protein P3A2 isoform X2 [Aedes aegypti]
AAEL025368-RA	Up in N7	XM_021856669.1	XP_021712359	uncharacterized protein LOC110680878 isoform X1 [Aedes aegypti]
AAEL006711-RA	Up in N7	XM_001657930.2	XP_001657980	BCL2/adenovirus E1B 19 kDa protein-interacting protein 3 isoform X2 [Aedes aegypti] >ref|XP_021708804.1| BCL2/adenovirus E1B 19 kDa protein-interacting protein 3 isoform X2 [Aedes aegypti] >gb|EAT41675.1| AAEL006711-PA [Aedes aegypti]
AAEL012595-RG	Up in N7	XM_021839093.1	XP_021694782	uncharacterized protein LOC5576540 isoform X1 [Aedes aegypti] >ref|XP_021694783.1| uncharacterized protein LOC5576540 isoform X1 [Aedes aegypti] >ref|XP_021694784.1| uncharacterized protein LOC5576540 isoform X1 [Aedes aegypti] >ref|XP_021694785.1| uncharacterized protein LOC5576540 isoform X1 [Aedes aegypti] >ref|XP_021694786.1| uncharacterized protein LOC5576540 isoform X1 [Aedes aegypti] >ref|…
AAEL014578-RE	Up in N7	XM_021840714.1	XP_021696396	E3 ubiquitin-protein ligase MARCH6 [Aedes aegypti] >ref|XP_021696397.1| E3 ubiquitin-protein ligase MARCH6 [Aedes aegypti] >ref|XP_021696398.1| E3 ubiquitin-protein ligase MARCH6 [Aedes aegypti] >ref|XP_021696399.1| E3 ubiquitin-protein ligase MARCH6 [Aedes aegypti] >ref|XP_021696400.1| E3 ubiquitin-protein ligase MARCH6 [Aedes aegypti] >ref|XP_021696401.1| E3 ubiquitin-protein ligase MARCH6 [Aed…
AAEL010596-RB	Up in N7	XM_021838262.1	XP_001654672	polypeptide N-acetylgalactosaminyltransferase 16 [Aedes aegypti] >ref|XP_021693954.1| polypeptide N-acetylgalactosaminyltransferase 16 [Aedes aegypti]
AAEL025177-RA	Up in N7	XM_021853035.1	XP_021695636	tigger transposable element-derived protein 6-like [Aedes aegypti]
AAEL024757-RA	Up in N7	XM_021840044.1	XP_021695736	probable glutamate receptor [Aedes aegypti]
AAEL012139-RA	Up in N7	XM_001655823.2	XP_001655873	allatostatins MIP [Aedes aegypti] >ref|XP_021704864.1| allatostatins MIP [Aedes aegypti] >gb|EAT35715.1| AAEL012139-PA [Aedes aegypti]
AAEL027402-RC	Up in N7	XM_021843657.1	XP_021699350	uncharacterized protein LOC5578857 isoform X2 [Aedes aegypti]
AAEL012110-RA	Up in N7	XM_001655806.2	XP_001655856	aminopeptidase N isoform X1 [Aedes aegypti]
AAEL013275-RE	Up in N7	XR_002500776.1	XP_001663434	importin subunit beta isoform X2 [Aedes aegypti] >gb|EAT34489.1| AAEL013275-PA [Aedes aegypti]
AAEL026787-RA	Up in N7	XM_021843373.1	XP_021699065	xanthine dehydrogenase [Aedes aegypti]
AAEL023351-RA	Up in N7	XR_002500859.1	not available	not available
AAEL014348-RC	Up in N7	XM_021844534.1	XP_001648537	caspase-1 isoform X1 [Aedes aegypti]
AAEL008105-RD	Up in N7	XM_021850631.1	XP_001653117	glutamate--cysteine ligase [Aedes aegypti] >ref|XP_021706323.1| glutamate--cysteine ligase [Aedes aegypti] >ref|XP_021706324.1| glutamate--cysteine ligase [Aedes aegypti] >gb|EAT40137.1| AAEL008105-PA [Aedes aegypti] >gb|EAT40138.1| AAEL008105-PB [Aedes aegypti]
AAEL005106-RE	Up in N7	XM_021843175.1	XP_001650392	nicotinamide riboside kinase 1 [Aedes aegypti] >ref|XP_021698864.1| nicotinamide riboside kinase 1 [Aedes aegypti] >ref|XP_021698865.1| nicotinamide riboside kinase 1 [Aedes aegypti] >ref|XP_021698866.1| nicotinamide riboside kinase 1 [Aedes aegypti] >ref|XP_021698867.1| nicotinamide riboside kinase 1 [Aedes aegypti] >gb|EAT43459.1| AAEL005106-PA [Aedes aegypti]
AAEL025517-RA	Up in N7	XM_021852553.1	XP_021708243	putative mediator of RNA polymerase II transcription subunit 26 [Aedes aegypti] >ref|XP_021708244.1| putative mediator of RNA polymerase II transcription subunit 26 [Aedes aegypti] >ref|XP_021708245.1| putative mediator of RNA polymerase II transcription subunit 26 [Aedes aegypti]
AAEL012041-RG	Up in N7	XM_021857420.1	EAT35825	AAEL012041-PA [Aedes aegypti]
AAEL008164-RC	Up in N7	XR_002501831.1	XP_001658986	protein elav [Aedes aegypti] >gb|EAT40063.1| AAEL008164-PA [Aedes aegypti]
AAEL019424-RAC	Up in N7	XM_021838932.1	XP_021694624	uncharacterized protein LOC5574328 isoform X12 [Aedes aegypti] >ref|XP_021694625.1| uncharacterized protein LOC5574328 isoform X12 [Aedes aegypti] >ref|XP_021694626.1| uncharacterized protein LOC5574328 isoform X12 [Aedes aegypti] >ref|XP_021694627.1| uncharacterized protein LOC5574328 isoform X12 [Aedes aegypti] >ref|XP_021694628.1| uncharacterized protein LOC5574328 isoform X12 [Aedes aegypti] …
AAEL019826-RF	Up in N7	XM_021846573.1	XP_021702265	leupaxin isoform X3 [Aedes aegypti] >ref|XP_021702266.1| leupaxin isoform X3 [Aedes aegypti] >ref|XP_021702267.1| leupaxin isoform X3 [Aedes aegypti] >ref|XP_021702268.1| leupaxin isoform X3 [Aedes aegypti]
AAEL019550-RD	Up in N7	XR_002500511.1	XP_021700660	dual specificity tyrosine-phosphorylation-regulated kinase 4 isoform X1 [Aedes aegypti]
AAEL018700-RI	Up in N7	XM_021850988.1	XP_021706675	SLIT-ROBO Rho GTPase-activating protein 1 isoform X1 [Aedes aegypti] >ref|XP_021706676.1| SLIT-ROBO Rho GTPase-activating protein 1 isoform X1 [Aedes aegypti] >ref|XP_021706678.1| SLIT-ROBO Rho GTPase-activating protein 1 isoform X1 [Aedes aegypti] >ref|XP_021706679.1| SLIT-ROBO Rho GTPase-activating protein 1 isoform X1 [Aedes aegypti] >ref|XP_021706680.1| SLIT-ROBO Rho GTPase-activating protein…
AAEL027633-RA	Up in N7	XR_002502287.1	EAT44402	AAEL004208-PA [Aedes aegypti]
AAEL006619-RC	Up in N7	XM_021848236.1	XP_021703926	protein phosphatase 1 regulatory subunit 14B [Aedes aegypti] >ref|XP_021703927.1| protein phosphatase 1 regulatory subunit 14B [Aedes aegypti] >ref|XP_021703928.1| protein phosphatase 1 regulatory subunit 14B [Aedes aegypti] >ref|XP_029720159.1| protein phosphatase 1 regulatory subunit 14B [Aedes albopictus] >ref|XP_029720161.1| protein phosphatase 1 regulatory subunit 14B [Aedes albopictus] >gb|…
AAEL000077-RB	Up in N7	XM_021849704.1	XP_001647887	zinc transporter 7 [Aedes aegypti] >ref|XP_021705396.1| zinc transporter 7 [Aedes aegypti] >ref|XP_021705397.1| zinc transporter 7 [Aedes aegypti] >gb|EAT48944.1| AAEL000077-PA [Aedes aegypti]
AAEL013729-RE	Up in N7	XM_021855846.1	XP_021711538	serine/threonine-protein kinase Genghis Khan isoform X2 [Aedes aegypti]
AAEL011469-RB	Up in N7	XM_021849392.1	XP_021705084	titin isoform X1 [Aedes aegypti] >ref|XP_021705085.1| titin isoform X1 [Aedes aegypti] >ref|XP_021705086.1| titin isoform X1 [Aedes aegypti]
AAEL001543-RD	Up in N7	XM_021840128.1	XP_021695818	uncharacterized protein LOC5571300 isoform X1 [Aedes aegypti]
AAEL006656-RC	Up in N7	XM_021853589.1	XP_021709281	anoctamin-1 isoform X1 [Aedes aegypti]
AAEL003461-RA	Up in N7	XM_001656810.2	XP_001656860	LOW QUALITY PROTEIN: mitochondrial intermediate peptidase [Aedes aegypti]
AAEL008069-RB	Up in N7	XM_021844339.1	XP_021700031	sushi, von Willebrand factor type A, EGF and pentraxin domain-containing protein 1 isoform X1 [Aedes aegypti]
AAEL022373-RB	Up in N7	XM_021854526.1	XP_021710218	moesin/ezrin/radixin homolog 2 isoform X2 [Aedes aegypti]
AAEL024525-RA	Up in N7	XM_021843377.1	XP_021699069	G-protein coupled receptor Mth2 [Aedes aegypti] >ref|XP_021699070.1| G-protein coupled receptor Mth2 [Aedes aegypti] >ref|XP_021699071.1| G-protein coupled receptor Mth2 [Aedes aegypti] >ref|XP_021699072.1| G-protein coupled receptor Mth2 [Aedes aegypti] >ref|XP_021699073.1| G-protein coupled receptor Mth2 [Aedes aegypti]
AAEL003554-RF	Up in N7	XM_021843837.1	XP_021699529	putative uncharacterized protein DDB_G0279653 isoform X2 [Aedes aegypti]
AAEL014274-RA	Up in N7	XM_001648283.2	XP_001648333	uncharacterized protein LOC5564013 isoform X2 [Aedes aegypti] >gb|EAT33451.1| AAEL014274-PA [Aedes aegypti]
AAEL001104-RB	Up in N7	XM_021855928.1	XP_021711620	drebrin-like protein isoform X1 [Aedes aegypti]
AAEL006133-RB	Up in N7	XM_021850153.1	XP_021705845	programmed cell death protein 7 isoform X1 [Aedes aegypti]
AAEL002308-RC	Up in N7	XM_021851792.1	XP_001661247	protein TIS11 [Aedes aegypti] >ref|XP_021707483.1| protein TIS11 [Aedes aegypti] >ref|XP_021707484.1| protein TIS11 [Aedes aegypti] >ref|XP_021707485.1| protein TIS11 [Aedes aegypti] >ref|XP_021707486.1| protein TIS11 [Aedes aegypti]
AAEL003992-RB	Up in N7	XM_021854072.1	XP_001648222	SET and MYND domain-containing protein 4 [Aedes aegypti] >ref|XP_021709764.1| SET and MYND domain-containing protein 4 [Aedes aegypti]
AAEL026600-RA	Up in N7	XM_021856436.1	XP_021712128	programmed cell death 6-interacting protein-like [Aedes aegypti]
AAEL006201-RA	Up in N7	XM_001657525.2	XP_001657575	uncharacterized protein LOC5567598 [Aedes aegypti] >ref|XP_021711623.1| uncharacterized protein LOC5567598 [Aedes aegypti]
AAEL007539-RD	Up in N7	XM_021852200.1	XP_021707892	transcription intermediary factor 1-alpha isoform X1 [Aedes aegypti]
AAEL024506-RA	Up in N7	XM_021856920.1	XP_021712612	WD repeat-containing protein 55 homolog [Aedes aegypti]
AAEL003640-RB	Up in N7	XM_021849549.1	XP_021705241	sodium-dependent nutrient amino acid transporter 1 isoform X2 [Aedes aegypti]
AAEL004451-RD	Up in N7	XM_021849716.1	XP_021705408	organic cation transporter protein isoform X1 [Aedes aegypti] >ref|XP_021705409.1| organic cation transporter protein isoform X1 [Aedes aegypti] >ref|XP_021705410.1| organic cation transporter protein isoform X1 [Aedes aegypti]
AAEL011441-RC	Up in N7	XM_021844149.1	XP_001661659	calcium/calmodulin-dependent protein kinase type 1 [Aedes aegypti] >ref|XP_021699840.1| calcium/calmodulin-dependent protein kinase type 1 [Aedes aegypti] >ref|XP_021699841.1| calcium/calmodulin-dependent protein kinase type 1 [Aedes aegypti]
AAEL004520-RL	Up in N7	XM_021845669.1	XP_021701355	dual 3',5'-cyclic-AMP and -GMP phosphodiesterase 11 isoform X1 [Aedes aegypti] >ref|XP_021701356.1| dual 3',5'-cyclic-AMP and -GMP phosphodiesterase 11 isoform X1 [Aedes aegypti] >ref|XP_021701357.1| dual 3',5'-cyclic-AMP and -GMP phosphodiesterase 11 isoform X1 [Aedes aegypti] >ref|XP_021701358.1| dual 3',5'-cyclic-AMP and -GMP phosphodiesterase 11 isoform X1 [Aedes aegypti] >ref|XP_021701359.1|…
AAEL006071-RJ	Up in N7	XM_021854741.1	XP_021710403	tyrosine-protein phosphatase 99A isoform X3 [Aedes aegypti] >ref|XP_021710414.1| tyrosine-protein phosphatase 99A isoform X3 [Aedes aegypti] >ref|XP_021710424.1| tyrosine-protein phosphatase 99A isoform X3 [Aedes aegypti] >ref|XP_021710433.1| tyrosine-protein phosphatase 99A isoform X3 [Aedes aegypti] >ref|XP_021710438.1| tyrosine-protein phosphatase 99A isoform X3 [Aedes aegypti] >ref|XP_0217104…
AAEL011099-RB	Up in N7	XM_021844408.1	XP_021700100	FAD synthase isoform X1 [Aedes aegypti]
AAEL028021-RB	Up in N7	XM_021839113.1	XP_021694805	uncharacterized protein LOC5564091 isoform X2 [Aedes aegypti] >ref|XP_021694806.1| uncharacterized protein LOC5564091 isoform X2 [Aedes aegypti] >ref|XP_021694807.1| uncharacterized protein LOC5564091 isoform X2 [Aedes aegypti] >ref|XP_021694809.1| uncharacterized protein LOC5564091 isoform X2 [Aedes aegypti] >ref|XP_021694810.1| uncharacterized protein LOC5564091 isoform X2 [Aedes aegypti]
AAEL001742-RC	Up in N7	XM_021840589.1	XP_021696271	serine/threonine-protein phosphatase 6 regulatory subunit 3 [Aedes aegypti] >ref|XP_021696272.1| serine/threonine-protein phosphatase 6 regulatory subunit 3 [Aedes aegypti] >ref|XP_021696273.1| serine/threonine-protein phosphatase 6 regulatory subunit 3 [Aedes aegypti] >ref|XP_021696274.1| serine/threonine-protein phosphatase 6 regulatory subunit 3 [Aedes aegypti] >ref|XP_021696275.1| serine/thre…
AAEL002269-RA	Up in N7	XM_001661117.2	XP_001661167	purine nucleoside phosphorylase isoform X2 [Aedes aegypti] >gb|EAT46566.1| AAEL002269-PA [Aedes aegypti]
AAEL012918-RD	Up in N7	XM_021842962.1	#N/A	#N/A
AAEL004853-RF	Up in N7	XM_021842054.1	XP_001649900	glycerol kinase [Aedes aegypti] >ref|XP_021697742.1| glycerol kinase [Aedes aegypti] >ref|XP_021697743.1| glycerol kinase [Aedes aegypti] >ref|XP_021697744.1| glycerol kinase [Aedes aegypti] >ref|XP_021697745.1| glycerol kinase [Aedes aegypti] >ref|XP_021697746.1| glycerol kinase [Aedes aegypti] >gb|EAT43737.1| AAEL004853-PA [Aedes aegypti]
AAEL019424-RX	Up in N7	XM_021838924.1	XP_021694616	protein lap4 isoform X5 [Aedes aegypti]
AAEL014410-RA	Up in N7	XM_001648674.2	XP_001648724	uncharacterized protein LOC5564378 [Aedes aegypti] >ref|XP_021693779.1| uncharacterized protein LOC5564378 [Aedes aegypti] >ref|XP_021693780.1| uncharacterized protein LOC5564378 [Aedes aegypti]
AAEL006071-RI	Up in N7	XM_021854741.1	XP_021710403	tyrosine-protein phosphatase 99A isoform X3 [Aedes aegypti] >ref|XP_021710414.1| tyrosine-protein phosphatase 99A isoform X3 [Aedes aegypti] >ref|XP_021710424.1| tyrosine-protein phosphatase 99A isoform X3 [Aedes aegypti] >ref|XP_021710433.1| tyrosine-protein phosphatase 99A isoform X3 [Aedes aegypti] >ref|XP_021710438.1| tyrosine-protein phosphatase 99A isoform X3 [Aedes aegypti] >ref|XP_0217104…
AAEL026677-RA	Up in N7	XM_021838530.1	XP_021694222	myosin heavy chain IB-like [Aedes aegypti]
AAEL009088-RH	Up in N1	XM_021839774.1	XP_021695461	epsin-1 isoform X1 [Aedes aegypti] >ref|XP_021695462.1| epsin-1 isoform X1 [Aedes aegypti] >ref|XP_021695463.1| epsin-1 isoform X1 [Aedes aegypti] >ref|XP_021695464.1| epsin-1 isoform X1 [Aedes aegypti] >ref|XP_021695465.1| epsin-1 isoform X1 [Aedes aegypti] >ref|XP_021695466.1| epsin-1 isoform X2 [Aedes aegypti] >ref|XP_021695467.1| epsin-1 isoform X1 [Aedes aegypti] >ref|XP_021695468.1| epsin-1…
AAEL002318-RA	Up in N1	XM_001661182.2	XP_001661232	zinc finger C4H2 domain-containing protein isoform X2 [Aedes aegypti] >ref|XP_021708015.1| zinc finger C4H2 domain-containing protein-like isoform X2 [Aedes aegypti] >gb|EAT46517.1| AAEL002318-PA [Aedes aegypti]
AAEL007404-RB	Up in N1	XM_021848506.1	XP_021704193	homeobox protein 5 isoform X2 [Aedes aegypti]
AAEL019700-RH	Up in N1	XM_021857627.1	XP_021713312	protein phosphatase PP2A 55 kDa regulatory subunit isoform X1 [Aedes aegypti] >ref|XP_021713313.1| protein phosphatase PP2A 55 kDa regulatory subunit isoform X1 [Aedes aegypti]
AAEL002924-RF	Up in N1	XM_021841639.1	XP_019546170	protein Mo25 [Aedes albopictus] >ref|XP_019546171.1| protein Mo25 [Aedes albopictus] >ref|XP_019546172.1| protein Mo25 [Aedes albopictus] >ref|XP_019546173.1| protein Mo25 [Aedes albopictus] >ref|XP_021697315.1| protein Mo25 [Aedes aegypti] >ref|XP_021697325.1| protein Mo25 [Aedes aegypti] >ref|XP_021697331.1| protein Mo25 [Aedes aegypti] >ref|XP_029710545.1| protein Mo25 [Aedes albopictus] >gb|E…
AAEL014271-RB	Up in N1	XM_011495339.2	EJY57955	AAEL017253-PB [Aedes aegypti] >gb|EJY57961.1| AAEL017253-PH [Aedes aegypti]
AAEL019451-RD	Up in N1	XM_021841043.1	XP_021696732	titin homolog isoform X7 [Aedes aegypti] >ref|XP_021696733.1| titin homolog isoform X7 [Aedes aegypti] >ref|XP_021696734.1| titin homolog isoform X7 [Aedes aegypti] >ref|XP_021696735.1| titin homolog isoform X7 [Aedes aegypti] >ref|XP_021696737.1| titin homolog isoform X7 [Aedes aegypti]
AAEL001928-RA	Up in N1	XM_001654263.2	XP_001654313	actin-1 [Aedes aegypti] >sp|P49128.2| RecName: Full=Actin-1; Flags: Precursor [Aedes aegypti] >gb|EAT46902.1| AAEL001928-PA [Aedes aegypti]
AAEL001688-RA	Up in N1	XM_001659916.2	XP_001659966	uncharacterized protein LOC5571835 isoform X3 [Aedes aegypti] >gb|EAT47191.1| AAEL001688-PA [Aedes aegypti]
AAEL010029-RC	Up in N1	XM_021841939.1	XP_021697630	uncharacterized protein LOC5572757 [Aedes aegypti] >ref|XP_021697631.1| uncharacterized protein LOC5572757 [Aedes aegypti]
AAEL006905-RB	Up in N1	XM_021846089.1	XP_021701780	uncharacterized protein LOC5571212 [Aedes aegypti] >ref|XP_021701781.1| uncharacterized protein LOC5571212 [Aedes aegypti] >ref|XP_021701782.1| uncharacterized protein LOC5571212 [Aedes aegypti] >ref|XP_021701783.1| uncharacterized protein LOC5571212 [Aedes aegypti]
AAEL004482-RB	Up in N1	XM_021851807.1	XP_021707499	RRP15-like protein isoform X1 [Aedes aegypti]
AAEL027589-RB	Up in N1	XM_021846319.1	XP_021702011	tudor domain-containing protein 1 isoform X1 [Aedes aegypti]
AAEL019880-RG	Up in N1	XM_021853553.1	XP_021709245	calcineurin-binding protein cabin-1 isoform X4 [Aedes aegypti]
AAEL024204-RC	Up in N1	XM_021841691.1	XP_021697380	F-box/LRR-repeat protein 6 [Aedes aegypti] >ref|XP_021697381.1| F-box/LRR-repeat protein 6 [Aedes aegypti] >ref|XP_021697382.1| F-box/LRR-repeat protein 6 [Aedes aegypti] >ref|XP_021697383.1| F-box/LRR-repeat protein 6 [Aedes aegypti] >ref|XP_021697384.1| F-box/LRR-repeat protein 6 [Aedes aegypti]
AAEL001464-RF	Up in N1	XM_021845388.1	XP_021701080	lysoplasmalogenase-like protein TMEM86A isoform X2 [Aedes aegypti]
AAEL006702-RB	Up in N1	XM_001657900.2	XP_001657950	angiopoietin-related protein 6 isoform X2 [Aedes aegypti]
AAEL002879-RD	Up in N1	XM_021837595.1	XP_021693286	heterogeneous nuclear ribonucleoprotein R isoform X15 [Aedes aegypti] >ref|XP_021693287.1| heterogeneous nuclear ribonucleoprotein R isoform X15 [Aedes aegypti] >ref|XP_021693288.1| heterogeneous nuclear ribonucleoprotein R isoform X15 [Aedes aegypti] >ref|XP_021693289.1| heterogeneous nuclear ribonucleoprotein R isoform X15 [Aedes aegypti]
AAEL000807-RA	Up in N1	XM_001651207.2	XP_001651257	dnaJ homolog subfamily C member 3 [Aedes aegypti] >ref|XP_021705034.1| dnaJ homolog subfamily C member 3 [Aedes aegypti]
AAEL006330-RC	Up in N1	XM_021855004.1	XP_001651908	microtubule-associated serine/threonine-protein kinase 3 isoform X1 [Aedes aegypti] >ref|XP_001651909.2| microtubule-associated serine/threonine-protein kinase 3 isoform X1 [Aedes aegypti] >ref|XP_021710694.1| microtubule-associated serine/threonine-protein kinase 3 isoform X1 [Aedes aegypti] >ref|XP_021710695.1| microtubule-associated serine/threonine-protein kinase 3 isoform X1 [Aedes aegypti] …
AAEL009184-RC	Up in N1	XM_001653665.2	XP_021697307	uncharacterized protein LOC5571601 isoform X1 [Aedes aegypti]
AAEL013814-RB	Up in N1	XM_021839414.1	XP_021695106	probable phosphomevalonate kinase isoform X2 [Aedes aegypti]
AAEL023384-RA	Up in N1	XM_021850089.1	XP_021705781	mucin-5AC isoform X3 [Aedes aegypti]
AAEL000994-RF	Up in N1	XM_021839895.1	XP_021695583	uncharacterized protein LOC5567847 isoform X1 [Aedes aegypti]
AAEL020625-RE	Up in N1	XM_021853916.1	XP_021709603	sarcolemmal membrane-associated protein [Aedes aegypti] >ref|XP_021709604.1| sarcolemmal membrane-associated protein [Aedes aegypti] >ref|XP_021709605.1| sarcolemmal membrane-associated protein [Aedes aegypti] >ref|XP_021709606.1| sarcolemmal membrane-associated protein [Aedes aegypti] >ref|XP_021709607.1| sarcolemmal membrane-associated protein [Aedes aegypti] >ref|XP_021709608.1| sarcolemmal me…
AAEL008608-RB	Up in N1	XM_021846483.1	XP_001653341	uncharacterized protein LOC5570833 [Aedes aegypti] >ref|XP_021702175.1| uncharacterized protein LOC5570833 [Aedes aegypti] >gb|EAT39620.1| AAEL008608-PA [Aedes aegypti]
AAEL013159-RB	Up in N1	XM_021850183.1	XP_021705874	insulin-like growth factor-binding protein complex acid labile subunit [Aedes aegypti] >ref|XP_021705875.1| insulin-like growth factor-binding protein complex acid labile subunit [Aedes aegypti]
AAEL005326-RA	Up in N1	XM_001650689.2	XP_001650739	SAC3 domain-containing protein 1 [Aedes aegypti]
AAEL002835-RC	Up in N1	XM_021853288.1	XP_021708980	oxidative stress-induced growth inhibitor 2 isoform X1 [Aedes aegypti] >ref|XP_021708982.1| oxidative stress-induced growth inhibitor 2 isoform X1 [Aedes aegypti] >ref|XP_021708983.1| oxidative stress-induced growth inhibitor 2 isoform X1 [Aedes aegypti] >ref|XP_021708984.1| oxidative stress-induced growth inhibitor 2 isoform X1 [Aedes aegypti]
AAEL022462-RD	Up in N1	XM_021852654.1	XP_021708342	transcription factor E2f1 [Aedes aegypti] >ref|XP_021708343.1| transcription factor E2f1 [Aedes aegypti] >ref|XP_021708344.1| transcription factor E2f1 [Aedes aegypti] >ref|XP_021708345.1| transcription factor E2f1 [Aedes aegypti] >ref|XP_021708346.1| transcription factor E2f1 [Aedes aegypti]
AAEL004583-RI	Up in N1	XM_021840470.1	XP_021696157	contactin-associated protein-like 4 isoform X1 [Aedes aegypti] >ref|XP_021696158.1| contactin-associated protein-like 4 isoform X1 [Aedes aegypti] >ref|XP_021696159.1| contactin-associated protein-like 4 isoform X1 [Aedes aegypti] >ref|XP_021696160.1| contactin-associated protein-like 4 isoform X1 [Aedes aegypti] >ref|XP_021696161.1| contactin-associated protein-like 4 isoform X1 [Aedes aegypti] …
AAEL000094-RB	Up in N1	XM_021851716.1	XP_021707409	G-box-binding factor isoform X2 [Aedes aegypti]
AAEL007658-RO	Up in N1	XM_021838991.1	XP_021694681	partitioning defective 3 homolog isoform X4 [Aedes aegypti] >ref|XP_021694682.1| partitioning defective 3 homolog isoform X4 [Aedes aegypti] >ref|XP_021694683.1| partitioning defective 3 homolog isoform X4 [Aedes aegypti] >ref|XP_021694684.1| partitioning defective 3 homolog isoform X4 [Aedes aegypti] >ref|XP_021694685.1| partitioning defective 3 homolog isoform X4 [Aedes aegypti] >ref|XP_0216946…
AAEL014695-RD	Up in N1	XM_021846301.1	XP_021701984	uncharacterized protein LOC5565015 [Aedes aegypti] >ref|XP_021701993.1| uncharacterized protein LOC5565015 [Aedes aegypti] >ref|XP_021702001.1| uncharacterized protein LOC5565015 [Aedes aegypti]
AAEL008510-RG	Up in N1	XM_021841681.1	XP_021697372	sphingosine kinase 2 [Aedes aegypti] >ref|XP_021697373.1| sphingosine kinase 2 [Aedes aegypti] >ref|XP_021697374.1| sphingosine kinase 2 [Aedes aegypti] >ref|XP_021697375.1| sphingosine kinase 2 [Aedes aegypti] >ref|XP_021697376.1| sphingosine kinase 2 [Aedes aegypti] >ref|XP_021697377.1| sphingosine kinase 2 [Aedes aegypti] >gb|EAT39700.1| AAEL008510-PA [Aedes aegypti] >gb|EAT44350.1| AAEL004285…
AAEL004007-RA	Up in N1	XM_001648222.2	XP_001648272	tRNA modification GTPase GTPBP3, mitochondrial [Aedes aegypti] >ref|XP_021707487.1| tRNA modification GTPase GTPBP3, mitochondrial [Aedes aegypti]
AAEL022689-RD	Up in N1	XM_021843648.1	XP_021699340	nuclear receptor coactivator 6 isoform X3 [Aedes aegypti]
AAEL019559-RB	Up in N1	XM_021847585.1	EAT46869	AAEL001979-PB [Aedes aegypti]
AAEL006376-RA	Up in N1	XM_001651904.2	XP_001651954	trypsin [Aedes aegypti]
AAEL010464-RD	Up in N1	XM_021857300.1	XP_001660861	glutamate dehydrogenase, mitochondrial isoform X2 [Aedes aegypti] >ref|XP_021712992.1| glutamate dehydrogenase, mitochondrial isoform X2 [Aedes aegypti] >gb|AAV31914.1| glutamate dehydrogenase [Aedes aegypti] >gb|EAT37557.1| AAEL010464-PA [Aedes aegypti] >gb|EAT37559.1| AAEL010464-PC [Aedes aegypti]
AAEL002998-RE	Up in N1	XM_021854752.1	XP_021710443	histone-lysine N-methyltransferase setd3 [Aedes aegypti] >ref|XP_021710444.1| histone-lysine N-methyltransferase setd3 [Aedes aegypti] >ref|XP_021710445.1| histone-lysine N-methyltransferase setd3 [Aedes aegypti] >ref|XP_021710446.1| histone-lysine N-methyltransferase setd3 [Aedes aegypti] >ref|XP_021710447.1| histone-lysine N-methyltransferase setd3 [Aedes aegypti] >ref|XP_021710448.1| histone-l…
AAEL009756-RD	Up in N1	XM_021854460.1	XP_021710151	kelch repeat and BTB domain-containing protein 12 isoform X1 [Aedes aegypti] >ref|XP_021710152.1| kelch repeat and BTB domain-containing protein 12 isoform X1 [Aedes aegypti]
AAEL019686-RA	Up in N1	XM_021838486.1	XP_021694178	uncharacterized protein LOC5564410 [Aedes aegypti] >ref|XP_021694179.1| uncharacterized protein LOC5564410 [Aedes aegypti] >ref|XP_021694180.1| uncharacterized protein LOC5564410 [Aedes aegypti]
AAEL013128-RH	Up in N1	XM_021843287.1	EAT34657	AAEL013128-PA [Aedes aegypti]
AAEL001902-RB	Up in N1	XM_021846989.1	XP_021702681	glutamate decarboxylase 1 isoform X2 [Aedes aegypti]
AAEL026119-RA	Up in N1	XR_002499555.1	not available	not available
AAEL007143-RB	Up in N1	XM_021847457.1	XP_019551611	potassium voltage-gated channel protein Shaw-like [Aedes albopictus] >ref|XP_021703147.1| potassium voltage-gated channel protein Shaw [Aedes aegypti] >ref|XP_021703148.1| potassium voltage-gated channel protein Shaw [Aedes aegypti] >ref|XP_021703149.1| potassium voltage-gated channel protein Shaw [Aedes aegypti] >ref|XP_029730485.1| potassium voltage-gated channel protein Shaw-like [Aedes albopi…
AAEL019654-RH	Up in N1	XM_021855199.1	XP_021710886	IQ motif and SEC7 domain-containing protein 1 isoform X2 [Aedes aegypti] >ref|XP_021710887.1| IQ motif and SEC7 domain-containing protein 1 isoform X2 [Aedes aegypti] >ref|XP_021710888.1| IQ motif and SEC7 domain-containing protein 1 isoform X2 [Aedes aegypti] >ref|XP_021710889.1| IQ motif and SEC7 domain-containing protein 1 isoform X2 [Aedes aegypti] >ref|XP_021710891.1| IQ motif and SEC7 domai…
AAEL001089-RA	Up in N1	XM_001657945.2	XP_021710716	mitochondrial intermembrane space import and assembly protein 40 [Aedes aegypti] >gb|EAT47825.1| AAEL001085-PA [Aedes aegypti]
AAEL025565-RA	Up in N1	XM_021856833.1	XP_021701322	uncharacterized protein LOC5568804 [Aedes aegypti] >ref|XP_021701323.1| uncharacterized protein LOC5568804 [Aedes aegypti] >ref|XP_021712525.1| uncharacterized protein LOC110674000 [Aedes aegypti] >ref|XP_021712526.1| uncharacterized protein LOC110674000 [Aedes aegypti]
AAEL002346-RC	Up in N1	XM_021838879.1	XP_021694571	plexin-A2 [Aedes aegypti] >ref|XP_021694572.1| plexin-A2 [Aedes aegypti] >ref|XP_021694573.1| plexin-A2 [Aedes aegypti]
AAEL001414-RB	Up in N1	XM_021840780.1	XP_001659167	leucine-rich repeat transmembrane neuronal protein 4 isoform X1 [Aedes aegypti]
AAEL026353-RA	Up in N1	XR_002502185.1	EAT44834	AAEL003821-PA [Aedes aegypti]
AAEL025488-RC	Up in N1	XM_021854549.1	XP_021710220	lateral signaling target protein 2 homolog isoform X1 [Aedes aegypti] >ref|XP_021710227.1| lateral signaling target protein 2 homolog isoform X1 [Aedes aegypti] >ref|XP_021710238.1| lateral signaling target protein 2 homolog isoform X1 [Aedes aegypti] >ref|XP_021710241.1| lateral signaling target protein 2 homolog isoform X1 [Aedes aegypti] >ref|XP_021712277.1| lateral signaling target protein 2 …
AAEL019668-RD	Up in N1	XM_021841140.1	XP_021696832	ribosomal protein S6 kinase alpha-5 [Aedes aegypti] >ref|XP_021696833.1| ribosomal protein S6 kinase alpha-5 [Aedes aegypti] >ref|XP_021696834.1| ribosomal protein S6 kinase alpha-5 [Aedes aegypti] >ref|XP_021696835.1| ribosomal protein S6 kinase alpha-5 [Aedes aegypti] >ref|XP_021696836.1| ribosomal protein S6 kinase alpha-5 [Aedes aegypti]
AAEL027606-RA	Up in N1	XM_021855791.1	XP_021711483	uncharacterized protein LOC5566691 [Aedes aegypti] >ref|XP_021711484.1| uncharacterized protein LOC5566691 [Aedes aegypti] >ref|XP_021711485.1| uncharacterized protein LOC5566691 [Aedes aegypti]
AAEL011280-RC	Up in N1	XM_021844181.1	XP_021699873	muscle calcium channel subunit alpha-1 isoform X7 [Aedes aegypti]
AAEL004217-RJ	Up in N1	XM_021837799.1	XP_021693444	serine/threonine-protein kinase 32A [Aedes aegypti] >ref|XP_021693451.1| serine/threonine-protein kinase 32A [Aedes aegypti] >ref|XP_021693456.1| serine/threonine-protein kinase 32A [Aedes aegypti] >ref|XP_021693464.1| serine/threonine-protein kinase 32A [Aedes aegypti] >ref|XP_021693468.1| serine/threonine-protein kinase 32A [Aedes aegypti] >ref|XP_021693471.1| serine/threonine-protein kinase 32…
AAEL019451-RO	Up in N1	XM_021841045.1	XP_021696732	titin homolog isoform X7 [Aedes aegypti] >ref|XP_021696733.1| titin homolog isoform X7 [Aedes aegypti] >ref|XP_021696734.1| titin homolog isoform X7 [Aedes aegypti] >ref|XP_021696735.1| titin homolog isoform X7 [Aedes aegypti] >ref|XP_021696737.1| titin homolog isoform X7 [Aedes aegypti]
AAEL027111-RD	Up in N1	XM_021846977.1	XP_021702669	serine/threonine-protein kinase GL21140 isoform X2 [Aedes aegypti]
AAEL011705-RC	Up in N1	XM_021841848.1	XP_001655648	zinc finger protein 235 isoform X1 [Aedes aegypti] >ref|XP_021697540.1| zinc finger protein 235 isoform X1 [Aedes aegypti] >ref|XP_021697541.1| zinc finger protein 235 isoform X1 [Aedes aegypti] >gb|EAT36193.1| AAEL011705-PA [Aedes aegypti]
AAEL026441-RC	Up in N1	XM_021844296.1	XP_021699985	uncharacterized protein LOC110676428 isoform X1 [Aedes aegypti]
AAEL022496-RD	Up in N1	XM_021840296.1	XP_021695985	protein prickle isoform X1 [Aedes aegypti]
AAEL020042-RB	Up in N1	XM_021838894.1	XP_021694586	uncharacterized protein LOC5574321 isoform X4 [Aedes aegypti]
AAEL004239-RA	Up in N1	XM_001648697.2	XP_001648747	uncharacterized protein LOC5564398 [Aedes aegypti] >gb|EAT44393.1| AAEL004239-PA [Aedes aegypti]
AAEL018234-RD	Up in N1	XM_021842610.1	XP_021698302	uncharacterized protein LOC5563832 isoform X1 [Aedes aegypti]
AAEL007129-RD	Up in N1	XM_021845029.1	XP_021700717	zwei Ig domain protein zig-8 [Aedes aegypti] >ref|XP_021700718.1| zwei Ig domain protein zig-8 [Aedes aegypti] >ref|XP_021700719.1| zwei Ig domain protein zig-8 [Aedes aegypti] >ref|XP_021700720.1| zwei Ig domain protein zig-8 [Aedes aegypti] >ref|XP_021700721.1| zwei Ig domain protein zig-8 [Aedes aegypti]
AAEL008542-RD	Up in N1	XM_021838004.1	XP_021693683	kinesin heavy chain isoform X2 [Aedes aegypti] >ref|XP_021693692.1| kinesin heavy chain isoform X2 [Aedes aegypti] >ref|XP_021693696.1| kinesin heavy chain isoform X2 [Aedes aegypti]
AAEL014382-RA	Up in N1	XM_001648588.3	XP_001648638	collectin-11 [Aedes aegypti] >gb|EAT33333.1| AAEL014382-PA [Aedes aegypti]
AAEL001246-RA	Up in N1	XM_001652854.2	XP_001652904	thymidylate kinase [Aedes aegypti]
AAEL008056-RI	Up in N1	XM_021844342.1	XP_021700033	uncharacterized protein LOC5569977 isoform X1 [Aedes aegypti] >ref|XP_021700034.1| uncharacterized protein LOC5569977 isoform X1 [Aedes aegypti]
AAEL006741-RD	Up in N1	XM_021841403.1	XP_001652179	putative uncharacterized protein DDB_G0290989 [Aedes aegypti] >ref|XP_021697093.1| putative uncharacterized protein DDB_G0290989 [Aedes aegypti] >ref|XP_021697094.1| putative uncharacterized protein DDB_G0290989 [Aedes aegypti] >ref|XP_021697095.1| putative uncharacterized protein DDB_G0290989 [Aedes aegypti] >gb|EAT41638.1| AAEL006741-PA [Aedes aegypti]
AAEL017526-RC	Up in N1	XM_021843279.1	XP_021698971	serine/arginine repetitive matrix protein 1 isoform X2 [Aedes aegypti]
AAEL020110-RC	Up in N1	XM_021842065.1	XP_021697757	transcriptional repressor p66-beta isoform X6 [Aedes aegypti]
AAEL026056-RA	Up in N1	XM_021857059.1	XP_021712751	NECAP-like protein CG9132 [Aedes aegypti]
AAEL011305-RC	Up in N1	XM_021840817.1	XP_021696507	G-protein coupled receptor GRL101 [Aedes aegypti] >ref|XP_021696509.1| G-protein coupled receptor GRL101 [Aedes aegypti]
AAEL000510-RB	Up in N1	XM_021854631.1	XP_001656957	uncharacterized protein LOC5578440 [Aedes aegypti] >ref|XP_021710323.1| uncharacterized protein LOC5578440 [Aedes aegypti]
AAEL012117-RC	Up in N1	XR_002500888.1	XP_021702947	mitochondrial carrier protein Rim2 [Aedes aegypti]
AAEL020265-RE	Up in N1	XM_021842174.1	XP_021697863	vacuolar protein sorting-associated protein 26B-like [Aedes aegypti] >ref|XP_021697864.1| vacuolar protein sorting-associated protein 26B-like [Aedes aegypti] >ref|XP_021697865.1| vacuolar protein sorting-associated protein 26B-like [Aedes aegypti] >ref|XP_021697866.1| vacuolar protein sorting-associated protein 26B-like [Aedes aegypti] >ref|XP_021697867.1| vacuolar protein sorting-associated pro…
AAEL025231-RA	Up in N1	XR_002500641.1	XP_039227582	ubiquitin-40S ribosomal protein S27a isoform X2 [Drosophila yakuba]
AAEL028110-RG	Up in N1	XM_021852539.1	XP_021708225	disheveled-associated activator of morphogenesis 1 isoform X1 [Aedes aegypti]
AAEL009067-RB	Up in N1	XM_021845057.1	XP_021700747	superkiller viralicidic activity 2-like 2 [Aedes aegypti] >ref|XP_021700749.1| superkiller viralicidic activity 2-like 2 [Aedes aegypti] >gb|EAT39110.1| AAEL009067-PA [Aedes aegypti]
AAEL008363-RI	Up in N1	XM_011495136.2	XP_011493438	transcription initiation factor TFIID subunit 12 isoform X1 [Aedes aegypti] >ref|XP_021706979.1| transcription initiation factor TFIID subunit 12 isoform X1 [Aedes aegypti] >gb|EAT39861.1| AAEL008363-PD [Aedes aegypti] >gb|EJY57742.1| AAEL008363-PC [Aedes aegypti]
AAEL020523-RA	Up in N1	XR_002500275.1	EDS35863	E3 ubiquitin-protein ligase mib1 [Culex quinquefasciatus]
AAEL026991-RB	Up in N1	XM_021857120.1	XP_001657339	protein windbeutel [Aedes aegypti] >ref|XP_011493775.1| protein windbeutel [Aedes aegypti] >ref|XP_021706322.1| protein windbeutel-like [Aedes aegypti] >ref|XP_021706325.1| protein windbeutel-like [Aedes aegypti] >ref|XP_021706327.1| protein windbeutel-like [Aedes aegypti] >ref|XP_021712812.1| protein windbeutel [Aedes aegypti] >gb|EAT33665.1| AAEL014052-PA [Aedes aegypti] >gb|EAT33666.1| AAEL014…
AAEL008838-RB	Up in N1	XM_021844568.1	XP_021700260	zinc finger protein 214 [Aedes aegypti] >ref|XP_021700261.1| zinc finger protein 214 [Aedes aegypti]
AAEL009372-RA	Up in N1	XM_021855393.1	XP_021711085	uncharacterized protein LOC5571896 [Aedes aegypti] >ref|XP_021711086.1| uncharacterized protein LOC5571896 [Aedes aegypti] >ref|XP_021711087.1| uncharacterized protein LOC5571896 [Aedes aegypti] >ref|XP_021711088.1| uncharacterized protein LOC5571896 [Aedes aegypti] >ref|XP_021711089.1| uncharacterized protein LOC5571896 [Aedes aegypti]
AAEL000217-RC	Up in N1	XM_021855758.1	XP_021711449	serine/threonine-protein kinase Tao isoform X1 [Aedes aegypti] >ref|XP_021711450.1| serine/threonine-protein kinase Tao isoform X1 [Aedes aegypti]
AAEL003106-RB	Up in N1	XM_021840678.1	XP_019544205	AP-2 complex subunit mu [Aedes albopictus] >ref|XP_021696368.1| AP-2 complex subunit mu [Aedes aegypti] >ref|XP_021696370.1| AP-2 complex subunit mu [Aedes aegypti] >ref|XP_035787384.1| AP-2 complex subunit mu [Anopheles albimanus] >ref|XP_035910260.1| AP-2 complex subunit mu [Anopheles stephensi] >ref|XP_035910262.1| AP-2 complex subunit mu [Anopheles stephensi] >ref|XP_039443469.1| AP-2 complex…
AAEL027089-RC	Up in N1	XM_021850630.1	XP_001657339	protein windbeutel [Aedes aegypti] >ref|XP_011493775.1| protein windbeutel [Aedes aegypti] >ref|XP_021706322.1| protein windbeutel-like [Aedes aegypti] >ref|XP_021706325.1| protein windbeutel-like [Aedes aegypti] >ref|XP_021706327.1| protein windbeutel-like [Aedes aegypti] >ref|XP_021712812.1| protein windbeutel [Aedes aegypti] >gb|EAT33665.1| AAEL014052-PA [Aedes aegypti] >gb|EAT33666.1| AAEL014…
AAEL024236-RG	Up in N1	XM_021838426.1	XP_021694121	DNA-binding protein RFX2 isoform X8 [Aedes aegypti]

## Sheet: Y7Y1
Gene	Expression	Nucleotide	Protein	Description
AAEL006740-RB	Up in Y7	XM_021841381.1	XP_021697073	uncharacterized protein LOC5568318 isoform X2 [Aedes aegypti]
AAEL005022-RB	Up in Y7	XM_021847927.1	XP_021703618	mediator of RNA polymerase II transcription subunit 15 [Aedes aegypti] >ref|XP_021703619.1| mediator of RNA polymerase II transcription subunit 15 [Aedes aegypti] >sp|Q17BA4.1| RecName: Full=Mediator of RNA polymerase II transcription subunit 15; AltName: Full=Mediator complex subunit 15 [Aedes aegypti] >gb|EAT43542.1| AAEL005022-PA [Aedes aegypti]
AAEL004853-RF	Up in Y7	XM_021842054.1	XP_001649900	glycerol kinase [Aedes aegypti] >ref|XP_021697742.1| glycerol kinase [Aedes aegypti] >ref|XP_021697743.1| glycerol kinase [Aedes aegypti] >ref|XP_021697744.1| glycerol kinase [Aedes aegypti] >ref|XP_021697745.1| glycerol kinase [Aedes aegypti] >ref|XP_021697746.1| glycerol kinase [Aedes aegypti] >gb|EAT43737.1| AAEL004853-PA [Aedes aegypti]
AAEL002287-RD	Up in Y7	XM_021839192.1	XP_021694884	decaprenyl-diphosphate synthase subunit 1 [Aedes aegypti] >ref|XP_021694885.1| decaprenyl-diphosphate synthase subunit 1 [Aedes aegypti] >ref|XP_021694886.1| decaprenyl-diphosphate synthase subunit 1 [Aedes aegypti]
AAEL019449-RC	Up in Y7	XM_021853461.1	XP_019533835	homeobox protein extradenticle isoform X1 [Aedes albopictus] >ref|XP_021709153.1| homeobox protein extradenticle isoform X1 [Aedes aegypti] >ref|XP_021709154.1| homeobox protein extradenticle isoform X1 [Aedes aegypti] >ref|XP_021709155.1| homeobox protein extradenticle isoform X1 [Aedes aegypti] >ref|XP_021709156.1| homeobox protein extradenticle isoform X1 [Aedes aegypti]
AAEL019793-RE	Up in Y7	XM_021847701.1	XP_021703400	uncharacterized protein LOC5573942 isoform X6 [Aedes aegypti]
AAEL021084-RD	Up in Y7	XM_021844664.1	XP_021700332	uncharacterized protein LOC5576465 isoform X1 [Aedes aegypti] >ref|XP_021700340.1| uncharacterized protein LOC5576465 isoform X1 [Aedes aegypti] >ref|XP_021700351.1| uncharacterized protein LOC5576465 isoform X1 [Aedes aegypti] >ref|XP_021700356.1| uncharacterized protein LOC5576465 isoform X1 [Aedes aegypti] >ref|XP_021700363.1| uncharacterized protein LOC5576465 isoform X1 [Aedes aegypti]
AAEL026355-RA	Up in Y7	XM_021850596.1	XP_021706290	host cell factor isoform X3 [Aedes aegypti]
AAEL006723-RE	Up in Y7	XM_021841399.1	XP_021697087	uncharacterized protein LOC5568305 [Aedes aegypti] >ref|XP_021697088.1| uncharacterized protein LOC5568305 [Aedes aegypti] >ref|XP_021697089.1| uncharacterized protein LOC5568305 [Aedes aegypti] >ref|XP_021697090.1| uncharacterized protein LOC5568305 [Aedes aegypti] >ref|XP_021697091.1| uncharacterized protein LOC5568305 [Aedes aegypti]
AAEL002358-RC	Up in Y7	XM_021842321.1	XP_021698013	protein zer-1 homolog isoform X1 [Aedes aegypti] >ref|XP_021698014.1| protein zer-1 homolog isoform X1 [Aedes aegypti]
AAEL022979-RM	Up in Y7	XM_021853124.1	EAT40392	AAEL007888-PA [Aedes aegypti]
AAEL010190-RG	Up in Y7	XM_021842730.1	XP_021698423	FH1/FH2 domain-containing protein 1 isoform X5 [Aedes aegypti]
AAEL006652-RD	Up in Y7	XM_001652088.2	XP_001652138	iron-sulfur cluster assembly 2 homolog, mitochondrial [Aedes aegypti] >ref|XP_001652139.1| iron-sulfur cluster assembly 2 homolog, mitochondrial [Aedes aegypti] >ref|XP_021705143.1| iron-sulfur cluster assembly 2 homolog, mitochondrial [Aedes aegypti] >gb|EAT41726.1| AAEL006652-PC [Aedes aegypti] >gb|EAT41727.1| AAEL006652-PA [Aedes aegypti] >gb|EAT41728.1| AAEL006652-PB [Aedes aegypti]
AAEL004853-RC	Up in Y7	XM_021842051.1	XP_001649900	glycerol kinase [Aedes aegypti] >ref|XP_021697742.1| glycerol kinase [Aedes aegypti] >ref|XP_021697743.1| glycerol kinase [Aedes aegypti] >ref|XP_021697744.1| glycerol kinase [Aedes aegypti] >ref|XP_021697745.1| glycerol kinase [Aedes aegypti] >ref|XP_021697746.1| glycerol kinase [Aedes aegypti] >gb|EAT43737.1| AAEL004853-PA [Aedes aegypti]
AAEL008542-RH	Up in Y7	XM_021837969.1	XP_021693650	kinesin heavy chain isoform X1 [Aedes aegypti] >ref|XP_021693656.1| kinesin heavy chain isoform X1 [Aedes aegypti] >ref|XP_021693661.1| kinesin heavy chain isoform X1 [Aedes aegypti] >ref|XP_021693670.1| kinesin heavy chain isoform X1 [Aedes aegypti] >ref|XP_021693676.1| kinesin heavy chain isoform X1 [Aedes aegypti]
AAEL019956-RF	Up in Y7	XM_021840410.1	XP_021696102	cAMP-dependent protein kinase type I regulatory subunit isoform X2 [Aedes aegypti]
AAEL024784-RB	Up in Y7	XM_021838381.1	XP_021694073	uncharacterized protein LOC5571232 isoform X1 [Aedes aegypti]
AAEL022773-RA	Up in Y7	XR_002500452.1	XP_029728400	tudor domain-containing protein 5 isoform X2 [Aedes albopictus]
AAEL000278-RC	Up in Y7	XM_021852967.1	XP_021708658	NAD kinase isoform X1 [Aedes aegypti] >ref|XP_021708659.1| NAD kinase isoform X1 [Aedes aegypti]
AAEL000405-RE	Up in Y7	XM_021855177.1	XP_021710867	teneurin-m isoform X6 [Aedes aegypti]
AAEL007770-RF	Up in Y7	XM_021844064.1	XP_021699752	potassium voltage-gated channel subfamily H member 8 isoform X5 [Aedes aegypti] >ref|XP_021699753.1| potassium voltage-gated channel subfamily H member 8 isoform X5 [Aedes aegypti] >ref|XP_021699754.1| potassium voltage-gated channel subfamily H member 8 isoform X5 [Aedes aegypti] >ref|XP_021699755.1| potassium voltage-gated channel subfamily H member 8 isoform X5 [Aedes aegypti]
AAEL013466-RG	Up in Y7	XM_021846276.1	XP_021701968	ankyrin-2 isoform X6 [Aedes aegypti]
AAEL009371-RG	Up in Y7	XM_021853952.1	XP_021709642	formin-like protein CG32138 [Aedes aegypti] >ref|XP_021709643.1| formin-like protein CG32138 [Aedes aegypti] >ref|XP_021709644.1| formin-like protein CG32138 [Aedes aegypti] >ref|XP_021709645.1| formin-like protein CG32138 [Aedes aegypti] >ref|XP_021709646.1| formin-like protein CG32138 [Aedes aegypti] >ref|XP_021709647.1| formin-like protein CG32138 [Aedes aegypti]
AAEL018032-RF	Up in Y7	XM_021844583.1	XP_021700275	uncharacterized protein KIAA1109 isoform X3 [Aedes aegypti]
AAEL003650-RB	Up in Y7	XM_021849448.1	EDS44660	inhibitor of growth protein 1 [Culex quinquefasciatus]
AAEL001329-RE	Up in Y7	XM_021854825.1	XP_001653053	solute carrier family 25 member 40 [Aedes aegypti] >ref|XP_021710514.1| solute carrier family 25 member 40 [Aedes aegypti] >ref|XP_021710515.1| solute carrier family 25 member 40 [Aedes aegypti] >ref|XP_021710516.1| solute carrier family 25 member 40 [Aedes aegypti] >ref|XP_021710517.1| solute carrier family 25 member 40 [Aedes aegypti] >ref|XP_021710518.1| solute carrier family 25 member 40 [Aed…
AAEL002759-RE	Up in Y7	XM_021854306.1	XP_001655951	tropomyosin-1 [Aedes aegypti] >ref|XP_019563702.2| tropomyosin-1 [Aedes albopictus] >ref|XP_021709998.1| tropomyosin-1 [Aedes aegypti] >ref|XP_029727832.1| tropomyosin-1 [Aedes albopictus] >ref|XP_029727858.1| tropomyosin-1 [Aedes albopictus] >gb|EAT46011.1| AAEL002759-PD [Aedes aegypti] >gb|KXJ80176.1| hypothetical protein RP20_CCG026319 [Aedes albopictus]
AAEL005915-RJ	Up in Y7	XM_021851840.1	XP_021707529	uncharacterized protein LOC5567273 [Aedes aegypti] >ref|XP_021707530.1| uncharacterized protein LOC5567273 [Aedes aegypti] >ref|XP_021707531.1| uncharacterized protein LOC5567273 [Aedes aegypti] >ref|XP_021707532.1| uncharacterized protein LOC5567273 [Aedes aegypti] >ref|XP_021707533.1| uncharacterized protein LOC5567273 [Aedes aegypti] >ref|XP_021707534.1| uncharacterized protein LOC5567273 [Aed…
AAEL024535-RD	Up in Y7	XM_021857580.1	XP_021713269	cadherin-23 [Aedes aegypti] >ref|XP_021713270.1| cadherin-23 [Aedes aegypti] >ref|XP_021713272.1| cadherin-23 [Aedes aegypti] >ref|XP_021713273.1| cadherin-23 [Aedes aegypti] >ref|XP_021713274.1| cadherin-23 [Aedes aegypti]
AAEL011964-RA	Up in Y7	XM_001655726.2	XP_001655776	zinc finger protein 70 [Aedes aegypti] >ref|XP_021706179.1| zinc finger protein 70 [Aedes aegypti] >ref|XP_021706180.1| zinc finger protein 70 [Aedes aegypti] >gb|EAT35910.1| AAEL011964-PA [Aedes aegypti]
AAEL001796-RA	Up in Y7	XM_021846773.1	XP_021702465	nuclear hormone receptor HR78 isoform X2 [Aedes aegypti]
AAEL002415-RG	Up in Y7	XM_021853835.1	XP_021709512	LIM and senescent cell antigen-like-containing domain protein 1 isoform X1 [Aedes aegypti]
AAEL011093-RC	Up in Y7	XM_021844420.1	XP_021700112	homer protein homolog 2 isoform X2 [Aedes aegypti]
AAEL007662-RD	Up in Y7	XM_021838952.1	XP_001658552	casein kinase I [Aedes aegypti] >ref|XP_021694640.1| casein kinase I [Aedes aegypti] >ref|XP_021694641.1| casein kinase I [Aedes aegypti] >ref|XP_021694642.1| casein kinase I [Aedes aegypti] >ref|XP_021694643.1| casein kinase I [Aedes aegypti] >ref|XP_021694644.1| casein kinase I [Aedes aegypti] >ref|XP_021694646.1| casein kinase I [Aedes aegypti] >ref|XP_021694647.1| casein kinase I [Aedes aegyp…
AAEL014695-RD	Up in Y7	XM_021846301.1	XP_021701984	uncharacterized protein LOC5565015 [Aedes aegypti] >ref|XP_021701993.1| uncharacterized protein LOC5565015 [Aedes aegypti] >ref|XP_021702001.1| uncharacterized protein LOC5565015 [Aedes aegypti]
AAEL010783-RD	Up in Y7	XM_021845584.1	XP_001654893	sodium/potassium-transporting ATPase subunit beta-2 [Aedes aegypti] >ref|XP_021701274.1| sodium/potassium-transporting ATPase subunit beta-2 [Aedes aegypti] >ref|XP_021701275.1| sodium/potassium-transporting ATPase subunit beta-2 [Aedes aegypti] >ref|XP_021701276.1| sodium/potassium-transporting ATPase subunit beta-2 [Aedes aegypti] >gb|EAT37221.1| AAEL010783-PA [Aedes aegypti]
AAEL002565-RG	Up in Y7	XM_021857737.1	XP_021713429	twitchin isoform X5 [Aedes aegypti]
AAEL000217-RC	Up in Y1	XM_021855758.1	XP_021711449	serine/threonine-protein kinase Tao isoform X1 [Aedes aegypti] >ref|XP_021711450.1| serine/threonine-protein kinase Tao isoform X1 [Aedes aegypti]
AAEL001421-RA	Up in Y1	XM_001659135.2	XP_001659185	vigilin [Aedes aegypti] >ref|XP_021696448.1| vigilin [Aedes aegypti] >ref|XP_021696449.1| vigilin [Aedes aegypti] >gb|EAT47472.1| AAEL001421-PA [Aedes aegypti]
AAEL006973-RA	Up in Y1	XM_001652386.2	XP_001652436	uncharacterized protein LOC5568606 [Aedes aegypti] >ref|XP_021702787.1| uncharacterized protein LOC5568606 [Aedes aegypti] >ref|XP_021702788.1| uncharacterized protein LOC5568606 [Aedes aegypti] >gb|EAT41367.1| AAEL006973-PA [Aedes aegypti]
AAEL009861-RD	Up in Y1	XM_001654015.2	XP_001654065	uncharacterized protein LOC5572533 isoform X1 [Aedes aegypti] >gb|EAT38230.1| AAEL009861-PD [Aedes aegypti] >gb|EAT38231.1| AAEL009861-PB [Aedes aegypti] >gb|EAT38232.1| AAEL009861-PA [Aedes aegypti]
AAEL004193-RD	Up in Y1	XM_021839009.1	XP_021694700	rhophilin-2 isoform X1 [Aedes aegypti] >ref|XP_021694701.1| rhophilin-2 isoform X1 [Aedes aegypti] >ref|XP_021694702.1| rhophilin-2 isoform X1 [Aedes aegypti] >ref|XP_021694703.1| rhophilin-2 isoform X1 [Aedes aegypti] >ref|XP_021694704.1| rhophilin-2 isoform X1 [Aedes aegypti]
AAEL006412-RA	Up in Y1	XM_001657750.2	XP_001657800	sodium- and chloride-dependent GABA transporter ine isoform X2 [Aedes aegypti] >gb|AAP88701.1| inebriated-like protein [Aedes aegypti] >gb|EAT42015.1| AAEL006412-PA [Aedes aegypti]
AAEL019514-RC	Up in Y1	XM_021852732.1	XP_021708424	uncharacterized protein LOC5576866 isoform X6 [Aedes aegypti]
AAEL019914-RE	Up in Y1	XM_021848205.1	XP_021703897	uncharacterized protein LOC5568178 isoform X2 [Aedes aegypti]
AAEL011355-RB	Up in Y1	XM_021839026.1	XP_021694717	carnitine O-acetyltransferase [Aedes aegypti] >ref|XP_021694718.1| carnitine O-acetyltransferase [Aedes aegypti] >ref|XP_021694719.1| carnitine O-acetyltransferase [Aedes aegypti] >gb|EAT36562.1| AAEL011355-PA [Aedes aegypti]
AAEL007780-RA	Up in Y1	XM_001658610.2	XP_001658660	uncharacterized protein LOC5569630 [Aedes aegypti]
AAEL025065-RF	Up in Y1	XM_021840942.1	XP_021696636	serine/arginine repetitive matrix protein 5 isoform X6 [Aedes aegypti]
AAEL018011-RD	Up in Y1	XR_002499680.1	XP_021696914	epidermal growth factor-like protein 7 [Aedes aegypti]
AAEL007796-RA	Up in Y1	XM_001652871.3	XP_001652921	proclotting enzyme isoform X3 [Aedes aegypti] >gb|EAT40468.1| AAEL007796-PA [Aedes aegypti]
AAEL001835-RA	Up in Y1	XM_001660346.2	XP_001660396	sodium-coupled monocarboxylate transporter 1 [Aedes aegypti]
AAEL017334-RA	Up in Y1	XM_011494827.2	XP_011493129	flocculation protein FLO11 [Aedes aegypti]
AAEL006870-RE	Up in Y1	XM_021850669.1	XP_001652281	sorting nexin-17 [Aedes aegypti] >ref|XP_021706358.1| sorting nexin-17 [Aedes aegypti] >ref|XP_021706359.1| sorting nexin-17 [Aedes aegypti] >ref|XP_021706360.1| sorting nexin-17 [Aedes aegypti] >ref|XP_021706361.1| sorting nexin-17 [Aedes aegypti] >ref|XP_021706362.1| sorting nexin-17 [Aedes aegypti] >ref|XP_021706363.1| sorting nexin-17 [Aedes aegypti] >gb|EAT41496.1| AAEL006870-PA [Aedes aegyp…
AAEL010180-RA	Up in Y1	XM_001654241.2	XP_001654291	uncharacterized protein LOC5572962 [Aedes aegypti] >gb|EAT37891.1| AAEL010180-PA [Aedes aegypti]
AAEL009224-RC	Up in Y1	XM_021842016.1	XP_001659833	transformer-2 protein homolog alpha isoform X1 [Aedes aegypti] >ref|XP_021697708.1| transformer-2 protein homolog alpha isoform X1 [Aedes aegypti] >ref|XP_021697709.1| transformer-2 protein homolog alpha isoform X1 [Aedes aegypti]
AAEL027606-RC	Up in Y1	XM_021855793.1	XP_021711483	uncharacterized protein LOC5566691 [Aedes aegypti] >ref|XP_021711484.1| uncharacterized protein LOC5566691 [Aedes aegypti] >ref|XP_021711485.1| uncharacterized protein LOC5566691 [Aedes aegypti]
AAEL000824-RD	Up in Y1	XM_021852973.1	XP_021708665	uncharacterized protein DDB_G0283697 isoform X1 [Aedes aegypti] >ref|XP_021708666.1| uncharacterized protein DDB_G0283697 isoform X1 [Aedes aegypti] >ref|XP_021708667.1| uncharacterized protein DDB_G0283697 isoform X1 [Aedes aegypti]
AAEL021895-RA	Up in Y1	XR_002501053.1	#N/A	#N/A
AAEL022120-RA	Up in Y1	XR_002499373.1	#N/A	#N/A
AAEL022695-RA	Up in Y1	XM_021844577.1	XP_021700269	uncharacterized protein LOC5576459 [Aedes aegypti]
AAEL019700-RD	Up in Y1	XM_021857625.1	XP_021713312	protein phosphatase PP2A 55 kDa regulatory subunit isoform X1 [Aedes aegypti] >ref|XP_021713313.1| protein phosphatase PP2A 55 kDa regulatory subunit isoform X1 [Aedes aegypti]
AAEL008363-RG	Up in Y1	XM_021851289.1	XP_011493438	transcription initiation factor TFIID subunit 12 isoform X1 [Aedes aegypti] >ref|XP_021706979.1| transcription initiation factor TFIID subunit 12 isoform X1 [Aedes aegypti] >gb|EAT39861.1| AAEL008363-PD [Aedes aegypti] >gb|EJY57742.1| AAEL008363-PC [Aedes aegypti]
AAEL006855-RE	Up in Y1	XM_021850885.1	XP_001652285	UDP-xylose and UDP-N-acetylglucosamine transporter [Aedes aegypti] >ref|XP_001652286.1| UDP-xylose and UDP-N-acetylglucosamine transporter [Aedes aegypti] >ref|XP_021706577.1| UDP-xylose and UDP-N-acetylglucosamine transporter [Aedes aegypti] >ref|XP_021706578.1| UDP-xylose and UDP-N-acetylglucosamine transporter [Aedes aegypti] >gb|EAT41500.1| AAEL006855-PA [Aedes aegypti] >gb|EAT41501.1| AAEL00…
AAEL005736-RB	Up in Y1	XM_001651333.2	XP_001651383	BUB3-interacting and GLEBS motif-containing protein ZNF207 isoform X2 [Aedes aegypti]
AAEL021555-RA	Up in Y1	XM_021857583.1	#N/A	#N/A
AAEL006995-RC	Up in Y1	XM_021851141.1	XP_021706833	sodium-coupled monocarboxylate transporter 1 isoform X2 [Aedes aegypti]
AAEL022720-RA	Up in Y1	XM_021842790.1	XP_021698482	uncharacterized transmembrane protein DDB_G0289901-like isoform X1 [Aedes aegypti]
AAEL005175-RB	Up in Y1	XR_002499303.1	XP_021695358	phosphatidate phosphatase LPIN3 [Aedes aegypti]
AAEL018340-RG	Up in Y1	XM_021844875.1	XP_021700567	uncharacterized protein LOC5566438 isoform X3 [Aedes aegypti]
AAEL019812-RE	Up in Y1	XM_021855369.1	XP_021711061	uncharacterized protein LOC5564138 isoform X3 [Aedes aegypti]
AAEL024439-RB	Up in Y1	XR_002500674.1	XP_021701457	uncharacterized protein LOC110676737 [Aedes aegypti]
AAEL019814-RD	Up in Y1	XM_021850619.1	XP_021706309	centrosomin isoform X2 [Aedes aegypti] >ref|XP_021706310.1| centrosomin isoform X2 [Aedes aegypti] >ref|XP_021706311.1| centrosomin isoform X2 [Aedes aegypti] >ref|XP_021706312.1| centrosomin isoform X2 [Aedes aegypti] >ref|XP_021706313.1| centrosomin isoform X2 [Aedes aegypti]
AAEL003529-RB	Up in Y1	XM_021844830.1	XP_021700522	zinc finger and BTB domain-containing protein 17 [Aedes aegypti] >ref|XP_021700523.1| zinc finger and BTB domain-containing protein 17 [Aedes aegypti]
AAEL001503-RE	Up in Y1	XM_021844926.1	XP_021700618	sodium/hydrogen exchanger 3 isoform X10 [Aedes aegypti]
AAEL008953-RG	Up in Y1	XM_021840890.1	XP_021696560	transcription factor kayak isoform X2 [Aedes aegypti]
AAEL007992-RA	Up in Y1	XM_001658735.2	XP_021693694	serine protease 7 isoform X1 [Aedes aegypti]
AAEL001796-RC	Up in Y1	XM_021846772.1	XP_001660403	nuclear hormone receptor HR78 isoform X1 [Aedes aegypti] >ref|XP_021702464.1| nuclear hormone receptor HR78 isoform X1 [Aedes aegypti] >gb|EAT47063.1| AAEL001796-PA [Aedes aegypti]

## Sheet: N7Y7
Gene	Expression	Nucleotide	Protein	Description
AAEL009131-RA	Up in N7	XM_001653640.3	XP_001653690	cytochrome P450 6d3 [Aedes aegypti] >gb|EAT39047.1| AAEL009131-PA [Aedes aegypti]
AAEL002390-RA	Up in N7	XM_001655112.2	XP_001655162	Krueppel homolog 1 isoform X1 [Aedes aegypti]
AAEL001421-RA	Up in N7	XM_001659135.2	XP_001659185	vigilin [Aedes aegypti] >ref|XP_021696448.1| vigilin [Aedes aegypti] >ref|XP_021696449.1| vigilin [Aedes aegypti] >gb|EAT47472.1| AAEL001421-PA [Aedes aegypti]
AAEL009861-RD	Up in N7	XM_001654015.2	XP_001654065	uncharacterized protein LOC5572533 isoform X1 [Aedes aegypti] >gb|EAT38230.1| AAEL009861-PD [Aedes aegypti] >gb|EAT38231.1| AAEL009861-PB [Aedes aegypti] >gb|EAT38232.1| AAEL009861-PA [Aedes aegypti]
AAEL004559-RC	Up in N7	XM_021849802.1	XP_029733692	synaptosomal-associated protein 25 isoform X2 [Aedes albopictus]
AAEL002343-RB	Up in N7	XM_021838905.1	XP_021694596	protein trachealess [Aedes aegypti] >ref|XP_021694597.1| protein trachealess [Aedes aegypti] >gb|EAT46470.1| AAEL002343-PA [Aedes aegypti]
AAEL001796-RC	Up in N7	XM_021846772.1	XP_001660403	nuclear hormone receptor HR78 isoform X1 [Aedes aegypti] >ref|XP_021702464.1| nuclear hormone receptor HR78 isoform X1 [Aedes aegypti] >gb|EAT47063.1| AAEL001796-PA [Aedes aegypti]
AAEL015255-RL	Up in N7	XM_021847178.1	XP_021702870	phosphatidylinositol 4-phosphate 5-kinase type-1 beta isoform X14 [Aedes aegypti] >ref|XP_021702871.1| phosphatidylinositol 4-phosphate 5-kinase type-1 beta isoform X14 [Aedes aegypti]
AAEL008262-RB	Up in N7	XM_021844489.1	XP_021700181	F-box/LRR-repeat protein 14 [Aedes aegypti]
AAEL023444-RA	Up in N7	XM_001650334.2	XP_001650384	zinc finger protein GLI2 [Aedes aegypti]
AAEL012062-RI	Up in N7	XM_021837809.1	XP_029733758	sodium/potassium-transporting ATPase subunit alpha isoform X4 [Aedes albopictus]
AAEL009645-RC	Up in N7	XM_001653852.2	XP_001653901	uncharacterized protein LOC5580019 [Aedes aegypti] >ref|XP_001653902.2| uncharacterized protein LOC5580019 [Aedes aegypti]
AAEL019939-RP	Up in N7	XM_021840701.1	XP_021696372	serine-rich adhesin for platelets isoform X1 [Aedes aegypti]
AAEL019686-RB	Up in N7	XM_021838488.1	XP_021694178	uncharacterized protein LOC5564410 [Aedes aegypti] >ref|XP_021694179.1| uncharacterized protein LOC5564410 [Aedes aegypti] >ref|XP_021694180.1| uncharacterized protein LOC5564410 [Aedes aegypti]
AAEL002428-RE	Up in N7	XM_021853760.1	XP_021709444	BTB/POZ domain-containing protein 6-B isoform X1 [Aedes aegypti] >ref|XP_021709452.1| BTB/POZ domain-containing protein 6-B isoform X1 [Aedes aegypti] >ref|XP_021709457.1| BTB/POZ domain-containing protein 6-B isoform X1 [Aedes aegypti]
AAEL004193-RD	Up in N7	XM_021839009.1	XP_021694700	rhophilin-2 isoform X1 [Aedes aegypti] >ref|XP_021694701.1| rhophilin-2 isoform X1 [Aedes aegypti] >ref|XP_021694702.1| rhophilin-2 isoform X1 [Aedes aegypti] >ref|XP_021694703.1| rhophilin-2 isoform X1 [Aedes aegypti] >ref|XP_021694704.1| rhophilin-2 isoform X1 [Aedes aegypti]
AAEL013492-RA	Up in N7	XM_001663638.3	XP_001663688	phenoloxidase 2 [Aedes aegypti] >ref|XP_021699380.1| phenoloxidase 2 [Aedes aegypti]
AAEL003605-RA	Up in N7	XM_021839190.1	XP_001657046	splicing factor 3B subunit 1 isoform X1 [Aedes aegypti] >gb|EAT45112.1| AAEL003605-PA [Aedes aegypti]
AAEL006973-RA	Up in N7	XM_001652386.2	XP_001652436	uncharacterized protein LOC5568606 [Aedes aegypti] >ref|XP_021702787.1| uncharacterized protein LOC5568606 [Aedes aegypti] >ref|XP_021702788.1| uncharacterized protein LOC5568606 [Aedes aegypti] >gb|EAT41367.1| AAEL006973-PA [Aedes aegypti]
AAEL028092-RB	Up in N7	XM_021837385.1	XP_021693077	fibroblast growth factor receptor homolog 1 isoform X1 [Aedes aegypti]
AAEL007450-RA	Up in N7	XM_021845374.1	XP_021701066	protein odd-skipped [Aedes aegypti]
AAEL021113-RE	Up in N7	XM_021850349.1	XP_021706041	uncharacterized protein LOC5576007 isoform X3 [Aedes aegypti]
AAEL022715-RA	Up in N7	XR_002501746.1	EAT43395	AAEL005154-PA [Aedes aegypti]
AAEL004407-RC	Up in N7	XM_001649022.2	XP_001649072	venom allergen 5 [Aedes aegypti]
AAEL022149-RB	Up in N7	XM_021844204.1	XP_021699896	uncharacterized protein LOC110676410 isoform X2 [Aedes aegypti]
AAEL005259-RC	Up in N7	XM_021841158.1	XP_021696850	natterin-4 isoform X1 [Aedes aegypti]
AAEL023074-RA	Up in N7	XR_002502962.1	XP_029710008	uncharacterized protein LOC109623099 isoform X9 [Aedes albopictus]
AAEL025995-RA	Up in N7	XR_002499986.1	EAT45101	AAEL003593-PA [Aedes aegypti]
AAEL000185-RD	Up in N7	XM_021852886.1	XP_001658942	eukaryotic translation initiation factor 5 [Aedes aegypti] >ref|XP_021708576.1| eukaryotic translation initiation factor 5 [Aedes aegypti] >ref|XP_021708577.1| eukaryotic translation initiation factor 5 [Aedes aegypti] >ref|XP_021708578.1| eukaryotic translation initiation factor 5 [Aedes aegypti] >gb|EAT48834.1| AAEL000185-PA [Aedes aegypti]
AAEL000193-RE	Up in N7	XM_021853286.1	XP_001658906	N-lysine methyltransferase KMT5A-B [Aedes aegypti] >ref|XP_021708975.1| N-lysine methyltransferase KMT5A-B [Aedes aegypti] >ref|XP_021708976.1| N-lysine methyltransferase KMT5A-B [Aedes aegypti] >ref|XP_021708977.1| N-lysine methyltransferase KMT5A-B [Aedes aegypti] >ref|XP_021708978.1| N-lysine methyltransferase KMT5A-B [Aedes aegypti] >gb|EAT48798.1| AAEL000193-PA [Aedes aegypti]
AAEL006436-RF	Up in N7	XM_021847858.1	XP_021703550	probable phosphorylase b kinase regulatory subunit beta isoform X5 [Aedes aegypti]
AAEL010778-RE	Up in N7	XM_001654826.2	XP_001654876	protein rolling stone [Aedes aegypti] >ref|XP_021701284.1| protein rolling stone [Aedes aegypti] >ref|XP_021701285.1| protein rolling stone [Aedes aegypti] >ref|XP_021701286.1| protein rolling stone [Aedes aegypti] >ref|XP_021701287.1| protein rolling stone [Aedes aegypti] >gb|EAT37204.1| AAEL010778-PB [Aedes aegypti] >gb|EAT37205.1| AAEL010778-PA [Aedes aegypti]
AAEL019420-RD	Up in N7	XM_021855033.1	XP_021710725	protein transport protein Sec16A isoform X3 [Aedes aegypti]
AAEL021303-RA	Up in N7	XM_021838192.1	XP_021693884	transcription factor grauzone isoform X1 [Aedes aegypti]
AAEL009742-RE	Up in N7	XM_021838497.1	XP_021694189	homeobox protein abdominal-A homolog isoform X2 [Aedes aegypti]
AAEL001647-RE	Up in N7	XM_021845476.1	XP_021701168	WD repeat-containing protein 81 [Aedes aegypti] >ref|XP_021701169.1| WD repeat-containing protein 81 [Aedes aegypti] >ref|XP_021701170.1| WD repeat-containing protein 81 [Aedes aegypti] >ref|XP_021701171.1| WD repeat-containing protein 81 [Aedes aegypti]
AAEL021813-RA	Up in N7	XR_002502746.1	XP_029722938	uncharacterized protein LOC115263750 [Aedes albopictus] >gb|KXJ80128.1| hypothetical protein RP20_CCG026451 [Aedes albopictus]
AAEL024341-RA	Up in N7	XR_002501100.1	XP_038110221	phospholipase D2 isoform X2 [Culex quinquefasciatus]
AAEL006711-RG	Up in N7	XM_021853087.1	XP_021708752	BCL2/adenovirus E1B 19 kDa protein-interacting protein 3 isoform X1 [Aedes aegypti] >ref|XP_021708760.1| BCL2/adenovirus E1B 19 kDa protein-interacting protein 3 isoform X1 [Aedes aegypti] >ref|XP_021708762.1| BCL2/adenovirus E1B 19 kDa protein-interacting protein 3 isoform X1 [Aedes aegypti] >ref|XP_021708768.1| BCL2/adenovirus E1B 19 kDa protein-interacting protein 3 isoform X1 [Aedes aegypti] …
AAEL019926-RA	Up in N7	XM_001652177.2	XP_001652227	atrial natriuretic peptide receptor 3 [Aedes aegypti]
AAEL027596-RA	Up in N7	XR_002500732.1	not available	not available
AAEL019558-RA	Up in N7	XM_021838134.1	EAT45503	AAEL003247-PA [Aedes aegypti]
AAEL021811-RA	Up in N7	XR_002500280.1	not available	not available
AAEL001548-RA	Up in N7	XM_001653552.2	XP_001653602	2-hydroxyacylsphingosine 1-beta-galactosyltransferase [Aedes aegypti] >gb|EAT47340.1| AAEL001548-PA [Aedes aegypti]
AAEL005147-RB	Up in N7	XM_021854902.1	XP_021710594	DNA-binding protein D-ETS-4 isoform X2 [Aedes aegypti] >ref|XP_021710596.1| DNA-binding protein D-ETS-4 isoform X2 [Aedes aegypti]
AAEL026481-RA	Up in N7	XR_002500918.1	EAT46873	AAEL002016-PA [Aedes aegypti]
AAEL004791-RD	Up in N7	XM_021855820.1	XP_021711512	sorting nexin-13 isoform X3 [Aedes aegypti]
AAEL008574-RA	Up in N7	XM_001653267.2	XP_001653317	probable peroxisomal acyl-coenzyme A oxidase 1 [Aedes aegypti] >ref|XP_021704356.1| probable peroxisomal acyl-coenzyme A oxidase 1 [Aedes aegypti] >ref|XP_021704357.1| probable peroxisomal acyl-coenzyme A oxidase 1 [Aedes aegypti] >ref|XP_021704358.1| probable peroxisomal acyl-coenzyme A oxidase 1 [Aedes aegypti] >ref|XP_021704359.1| probable peroxisomal acyl-coenzyme A oxidase 1 [Aedes aegypti] …
AAEL020559-RG	Up in N7	XM_021839338.1	XP_021695030	signal transducer and transcription activator isoform X2 [Aedes aegypti]
AAEL005175-RB	Up in N7	XR_002499303.1	XP_021695358	phosphatidate phosphatase LPIN3 [Aedes aegypti]
AAEL009874-RO	Up in N7	XM_021842562.1	XP_021698233	E3 ubiquitin-protein ligase znrf2 isoform X1 [Aedes aegypti] >ref|XP_021698238.1| E3 ubiquitin-protein ligase znrf2 isoform X1 [Aedes aegypti] >ref|XP_021698244.1| E3 ubiquitin-protein ligase znrf2 isoform X1 [Aedes aegypti] >ref|XP_021698249.1| E3 ubiquitin-protein ligase znrf2 isoform X1 [Aedes aegypti] >ref|XP_021698254.1| E3 ubiquitin-protein ligase znrf2 isoform X1 [Aedes aegypti] >ref|XP_02…
AAEL026680-RA	Up in N7	XR_002500140.1	not available	not available
AAEL008686-RD	Up in N7	XM_021845804.1	XP_021701494	serine-rich adhesin for platelets isoform X1 [Aedes aegypti]
AAEL018334-RE	Up in N7	XM_021854625.1	XP_021710294	ABC transporter G family member 23 isoform X2 [Aedes aegypti]
AAEL005111-RB	Up in N7	XM_021843180.1	XP_021698872	uncharacterized protein LOC5566015 isoform X1 [Aedes aegypti]
AAEL011051-RI	Up in N7	XM_021841021.1	XP_021696709	lysophospholipid acyltransferase 1 isoform X1 [Aedes aegypti] >ref|XP_021696710.1| lysophospholipid acyltransferase 1 isoform X1 [Aedes aegypti] >ref|XP_021696711.1| lysophospholipid acyltransferase 1 isoform X1 [Aedes aegypti] >ref|XP_021696712.1| lysophospholipid acyltransferase 1 isoform X1 [Aedes aegypti] >ref|XP_021696713.1| lysophospholipid acyltransferase 1 isoform X1 [Aedes aegypti] >ref|…
AAEL013458-RF	Up in N7	XM_021857331.1	XP_001656718	glutamine synthetase 2 cytoplasmic isoform X2 [Aedes aegypti] >gb|EAT34276.1| AAEL013458-PC [Aedes aegypti]
AAEL009422-RE	Up in N7	XM_001659989.2	XP_001660039	zinc finger protein on ecdysone puffs isoform X3 [Aedes aegypti] >gb|EAT38703.1| AAEL009422-PF [Aedes aegypti] >gb|EAT47659.1| AAEL001279-PB [Aedes aegypti]
AAEL022651-RA	Up in N7	XM_021856676.1	XP_021712368	puromycin-sensitive aminopeptidase-like protein [Aedes aegypti]
AAEL020789-RA	Up in N7	XM_021838700.1	XP_021694390	uncharacterized protein LOC110674569 [Aedes aegypti] >ref|XP_021694391.1| uncharacterized protein LOC110674569 [Aedes aegypti] >ref|XP_021694392.1| uncharacterized protein LOC110674569 [Aedes aegypti] >ref|XP_021694394.1| uncharacterized protein LOC110674569 [Aedes aegypti] >ref|XP_021694397.1| uncharacterized protein LOC110674569 [Aedes aegypti] >ref|XP_021694400.1| uncharacterized protein LOC11…
AAEL024141-RD	Up in N7	XM_021848242.1	XP_021703934	paired amphipathic helix protein Sin3a isoform X1 [Aedes aegypti] >ref|XP_021703935.1| paired amphipathic helix protein Sin3a isoform X1 [Aedes aegypti] >ref|XP_021703936.1| paired amphipathic helix protein Sin3a isoform X1 [Aedes aegypti] >ref|XP_021703937.1| paired amphipathic helix protein Sin3a isoform X1 [Aedes aegypti] >ref|XP_021703938.1| paired amphipathic helix protein Sin3a isoform X1 […
AAEL005617-RB	Up in N7	XM_001651087.2	XP_001651137	UTP--glucose-1-phosphate uridylyltransferase isoform X2 [Aedes aegypti] >gb|AAX47080.1| UDP-glucose pyrophosphorylase [Aedes aegypti] >gb|EAT42894.1| AAEL005617-PA [Aedes aegypti]
AAEL021276-RA	Up in N7	XM_021843200.1	XP_021698892	CKLF-like MARVEL transmembrane domain-containing protein 4 [Aedes aegypti]
AAEL013402-RD	Up in N7	XM_001663539.2	XP_001663589	E3 ubiquitin-protein ligase Mdm2 isoform X1 [Aedes aegypti]
AAEL021170-RA	Up in N7	XR_002501772.1	not available	not available
AAEL003953-RV	Up in N7	XM_021848968.1	XP_021704660	serine/threonine-protein kinase MARK1 isoform X11 [Aedes aegypti] >ref|XP_021704661.1| serine/threonine-protein kinase MARK1 isoform X11 [Aedes aegypti] >ref|XP_021704662.1| serine/threonine-protein kinase MARK1 isoform X11 [Aedes aegypti] >ref|XP_021704663.1| serine/threonine-protein kinase MARK1 isoform X11 [Aedes aegypti]
AAEL008471-RK	Up in N7	XM_021840106.1	XP_021695793	uncharacterized protein LOC5579397 isoform X2 [Aedes aegypti] >ref|XP_021695794.1| uncharacterized protein LOC5579397 isoform X2 [Aedes aegypti] >ref|XP_021695795.1| uncharacterized protein LOC5579397 isoform X2 [Aedes aegypti] >ref|XP_021695796.1| uncharacterized protein LOC5579397 isoform X2 [Aedes aegypti] >ref|XP_021695797.1| uncharacterized protein LOC5579397 isoform X2 [Aedes aegypti] >ref|…
AAEL005463-RE	Up in N7	XM_021853174.1	EAT43061	AAEL005463-PA [Aedes aegypti]
AAEL000362-RE	Up in N7	XM_021842217.1	XP_021697909	uncharacterized protein LOC5575136 isoform X5 [Aedes aegypti]
AAEL004415-RD	Up in N7	XM_021851900.1	XP_021707590	poly(U)-binding-splicing factor half pint isoform X2 [Aedes aegypti] >ref|XP_021707591.1| poly(U)-binding-splicing factor half pint isoform X2 [Aedes aegypti] >ref|XP_021707592.1| poly(U)-binding-splicing factor half pint isoform X2 [Aedes aegypti] >ref|XP_021707593.1| poly(U)-binding-splicing factor half pint isoform X2 [Aedes aegypti]
AAEL013770-RB	Up in N7	XM_021842086.1	XP_021697776	PR domain zinc finger protein 1 isoform X1 [Aedes aegypti]
AAEL006095-RA	Up in N7	XM_001657381.2	XP_001657431	gelsolin isoform X2 [Aedes aegypti]
AAEL020264-RD	Up in N7	XM_021845439.1	XP_021701131	protein sidekick isoform X3 [Aedes aegypti]
AAEL005985-RA	Up in N7	XM_001664283.2	XP_001664333	autophagy-related protein 13 homolog isoform X2 [Aedes aegypti] >gb|EAT42494.1| AAEL005985-PA [Aedes aegypti]
AAEL004479-RH	Up in N7	XM_021855318.1	XP_021711005	organic cation transporter protein isoform X1 [Aedes aegypti] >ref|XP_021711006.1| organic cation transporter protein isoform X1 [Aedes aegypti] >ref|XP_021711007.1| organic cation transporter protein isoform X1 [Aedes aegypti] >ref|XP_021711008.1| organic cation transporter protein isoform X1 [Aedes aegypti] >ref|XP_021711009.1| organic cation transporter protein isoform X1 [Aedes aegypti] >ref|…
AAEL024936-RA	Up in N7	XM_021843300.1	XP_021698992	protein disabled isoform X2 [Aedes aegypti]
AAEL020789-RE	Up in N7	XM_021838698.1	XP_021694390	uncharacterized protein LOC110674569 [Aedes aegypti] >ref|XP_021694391.1| uncharacterized protein LOC110674569 [Aedes aegypti] >ref|XP_021694392.1| uncharacterized protein LOC110674569 [Aedes aegypti] >ref|XP_021694394.1| uncharacterized protein LOC110674569 [Aedes aegypti] >ref|XP_021694397.1| uncharacterized protein LOC110674569 [Aedes aegypti] >ref|XP_021694400.1| uncharacterized protein LOC11…
AAEL024504-RA	Up in N7	XM_021838454.1	XP_021694146	uncharacterized protein LOC5565140 isoform X2 [Aedes aegypti]
AAEL003743-RD	Up in N7	XM_021837446.1	XP_021693138	V-type proton ATPase 116 kDa subunit a isoform X4 [Aedes aegypti]
AAEL001473-RE	Up in N7	XM_021844908.1	XP_021700600	intersectin-1 isoform X2 [Aedes aegypti]
AAEL001864-RA	Up in N7	XM_001654101.2	XP_001654151	eukaryotic translation initiation factor 4E-binding protein 1 [Aedes aegypti] >gb|ACJ15315.1| eukaryotic initiation factor 4E binding protein [Aedes aegypti] >gb|EAT47005.1| AAEL001864-PA [Aedes aegypti]
AAEL021812-RA	Up in N7	XM_021849158.1	EAT42254	AAEL006190-PA [Aedes aegypti]
AAEL020923-RA	Up in N7	XR_002499414.1	not available	not available
AAEL019495-RD	Up in N7	XM_021847439.1	XP_021703131	uncharacterized protein LOC5571525 isoform X4 [Aedes aegypti]
AAEL008032-RA	Up in N7	XM_001658780.2	XP_001658830	protein msta [Aedes aegypti] >ref|XP_021705243.1| protein msta [Aedes aegypti]
AAEL006062-RD	Up in N7	XM_021848862.1	XP_021704554	protein neuralized isoform X1 [Aedes aegypti]
AAEL004486-RA	Up in N7	XM_001649229.2	XP_001649279	probable serine hydrolase [Aedes aegypti]
AAEL027514-RB	Up in N7	XM_021853619.1	XP_021709311	uncharacterized protein LOC110679302 isoform X2 [Aedes aegypti]
AAEL019758-RF	Up in N7	XM_021853159.1	XP_021708851	interferon regulatory factor 2-binding protein-like B isoform X2 [Aedes aegypti]
AAEL014618-RA	Up in N7	XM_001649056.2	XP_001649106	probable cytochrome P450 9f2 [Aedes aegypti]
AAEL002999-RB	Up in N7	XM_021857378.1	XP_001662927	uncharacterized protein LOC5580309 [Aedes aegypti] >ref|XP_021713070.1| uncharacterized protein LOC5580309 [Aedes aegypti] >ref|XP_021713071.1| uncharacterized protein LOC5580309 [Aedes aegypti]
AAEL011399-RB	Up in N7	XM_021853703.1	XP_001661632	uncharacterized protein LOC5580159 [Aedes aegypti] >ref|XP_021709395.1| uncharacterized protein LOC5580159 [Aedes aegypti] >gb|EAT36522.1| AAEL011399-PA [Aedes aegypti]
AAEL025391-RC	Up in N7	XM_021848381.1	XP_021704073	uncharacterized protein LOC5569762 isoform X1 [Aedes aegypti]
AAEL005617-RA	Up in N7	XM_021853957.1	XP_021709649	UTP--glucose-1-phosphate uridylyltransferase isoform X1 [Aedes aegypti]
AAEL012634-RB	Up in N7	XM_021840827.1	XP_021696519	chaoptin-like [Aedes aegypti]
AAEL004090-RC	Up in N7	XM_021855338.1	XP_021711030	protein SERAC1 isoform X3 [Aedes aegypti]
AAEL012150-RB	Up in N7	XM_001662226.2	XP_001662276	H2.0-like homeobox protein [Aedes aegypti]
AAEL003959-RE	Up in N7	XM_021849383.1	XP_001648134	dehydrogenase/reductase SDR family member 7 [Aedes aegypti] >ref|XP_021705072.1| dehydrogenase/reductase SDR family member 7 [Aedes aegypti] >ref|XP_021705073.1| dehydrogenase/reductase SDR family member 7 [Aedes aegypti] >ref|XP_021705074.1| dehydrogenase/reductase SDR family member 7 [Aedes aegypti] >ref|XP_021705075.1| dehydrogenase/reductase SDR family member 7 [Aedes aegypti] >gb|ABF18350.1|…
AAEL022720-RA	Up in N7	XM_021842790.1	XP_021698482	uncharacterized transmembrane protein DDB_G0289901-like isoform X1 [Aedes aegypti]
AAEL021440-RA	Up in N7	XR_002498587.1	EAT39056	AAEL009115-PA [Aedes aegypti]
AAEL012583-RE	Up in N7	XM_021838045.1	XP_021693737	probable Rho GTPase-activating protein CG5521 isoform X2 [Aedes aegypti]
AAEL000256-RC	Up in N7	XM_021844250.1	XP_001660151	scavenger receptor class B member 1 isoform X1 [Aedes aegypti] >ref|XP_021699940.1| scavenger receptor class B member 1 isoform X1 [Aedes aegypti] >ref|XP_021699942.1| scavenger receptor class B member 1 isoform X1 [Aedes aegypti] >gb|EAT48769.1| AAEL000256-PA [Aedes aegypti]
AAEL006905-RD	Up in N7	XM_021846091.1	XP_021701780	uncharacterized protein LOC5571212 [Aedes aegypti] >ref|XP_021701781.1| uncharacterized protein LOC5571212 [Aedes aegypti] >ref|XP_021701782.1| uncharacterized protein LOC5571212 [Aedes aegypti] >ref|XP_021701783.1| uncharacterized protein LOC5571212 [Aedes aegypti]
AAEL007804-RB	Up in N7	XM_021852108.1	XP_021707800	semaphorin-5A [Aedes aegypti] >ref|XP_021707801.1| semaphorin-5A [Aedes aegypti] >ref|XP_021707802.1| semaphorin-5A [Aedes aegypti] >ref|XP_021707803.1| semaphorin-5A [Aedes aegypti]
AAEL013684-RG	Up in N7	XM_021838369.1	XP_001663859	uncharacterized protein LOC5578392 isoform X3 [Aedes aegypti] >ref|XP_021694039.1| uncharacterized protein LOC5578392 isoform X3 [Aedes aegypti] >ref|XP_021694049.1| uncharacterized protein LOC5578392 isoform X3 [Aedes aegypti] >ref|XP_021694059.1| uncharacterized protein LOC5578392 isoform X3 [Aedes aegypti] >ref|XP_021694061.1| uncharacterized protein LOC5578392 isoform X3 [Aedes aegypti] >ref|…
AAEL003137-RC	Up in N7	XM_021855935.1	XP_021711627	uncharacterized protein LOC5577238 isoform X2 [Aedes aegypti]
AAEL008141-RD	Up in N7	XM_021854837.1	XP_021710526	period circadian protein isoform X1 [Aedes aegypti]
AAEL006510-RB	Up in N7	XM_021848303.1	XP_021703995	eukaryotic translation initiation factor 4E-binding protein Mextli isoform X1 [Aedes aegypti]
AAEL019488-RC	Up in N7	XM_021843762.1	XP_011493090	protein tamozhennic [Aedes aegypti] >ref|XP_021699453.1| protein tamozhennic [Aedes aegypti] >ref|XP_021699454.1| protein tamozhennic [Aedes aegypti]
AAEL009185-RF	Up in N7	XM_021841644.1	XP_021697336	arginine kinase isoform X5 [Aedes aegypti]
AAEL011519-RA	Up in N7	XM_001661671.2	XP_001661721	solute carrier family 45 member 4 [Aedes aegypti]
AAEL019812-RE	Up in N7	XM_021855369.1	XP_021711061	uncharacterized protein LOC5564138 isoform X3 [Aedes aegypti]
AAEL002879-RV	Up in N7	XM_021837593.1	XP_021693280	heterogeneous nuclear ribonucleoprotein R isoform X10 [Aedes aegypti]
AAEL004986-RA	Up in N7	XM_021845186.1	XP_021700878	protein SMG5 [Aedes aegypti]
AAEL014768-RC	Up in N7	XM_021841420.1	XP_021697112	glutamate synthase 1 [NADH], chloroplastic isoform X2 [Aedes aegypti]
AAEL017297-RB	Up in N7	XM_021847446.1	XP_011492959	probable cytochrome P450 6a14 [Aedes aegypti] >ref|XP_021703138.1| probable cytochrome P450 6a14 [Aedes aegypti] >ref|XP_021703139.1| probable cytochrome P450 6a14 [Aedes aegypti] >gb|EJY57790.1| AAEL017297-PA [Aedes aegypti]
AAEL003953-RM	Up in N7	XM_021848976.1	XP_021704668	serine/threonine-protein kinase MARK2 isoform X16 [Aedes aegypti]
AAEL017297-RA	Up in N7	XM_011494657.2	XP_011492959	probable cytochrome P450 6a14 [Aedes aegypti] >ref|XP_021703138.1| probable cytochrome P450 6a14 [Aedes aegypti] >ref|XP_021703139.1| probable cytochrome P450 6a14 [Aedes aegypti] >gb|EJY57790.1| AAEL017297-PA [Aedes aegypti]
AAEL019812-RD	Up in N7	XM_021855367.1	XP_021711059	uncharacterized protein LOC5564138 isoform X1 [Aedes aegypti]
AAEL027120-RA	Up in N7	XM_021851200.1	XP_021706892	glycoprotein endo-alpha-1,2-mannosidase [Aedes aegypti] >ref|XP_021706893.1| glycoprotein endo-alpha-1,2-mannosidase [Aedes aegypti]
AAEL014972-RC	Up in N7	XM_021842669.1	XP_021698361	facilitated trehalose transporter Tret1 [Aedes aegypti] >ref|XP_021698362.1| facilitated trehalose transporter Tret1 [Aedes aegypti] >ref|XP_021698363.1| facilitated trehalose transporter Tret1 [Aedes aegypti] >ref|XP_021698364.1| facilitated trehalose transporter Tret1 [Aedes aegypti] >ref|XP_021698365.1| facilitated trehalose transporter Tret1 [Aedes aegypti] >ref|XP_029722402.1| facilitated tr…
AAEL019578-RC	Up in N7	XM_021848137.1	XP_021703827	uncharacterized protein LOC5565895 isoform X1 [Aedes aegypti] >ref|XP_021703828.1| uncharacterized protein LOC5565895 isoform X1 [Aedes aegypti] >ref|XP_021703829.1| uncharacterized protein LOC5565895 isoform X1 [Aedes aegypti]
AAEL004715-RA	Up in N7	XM_021846802.1	XP_021702494	protein BTG1 [Aedes aegypti] >gb|EAT43873.1| AAEL004715-PA [Aedes aegypti]
AAEL019827-RC	Up in N7	XM_021845511.1	XP_021701201	kinesin-like protein KIF21B isoform X1 [Aedes aegypti] >ref|XP_021701202.1| kinesin-like protein KIF21B isoform X1 [Aedes aegypti] >ref|XP_021701203.1| kinesin-like protein KIF21B isoform X1 [Aedes aegypti] >ref|XP_021701204.1| kinesin-like protein KIF21B isoform X1 [Aedes aegypti]
AAEL027982-RA	Up in N7	XM_021849215.1	XP_021704907	peptidoglycan-recognition protein LE [Aedes aegypti]
AAEL005239-RA	Up in N7	XM_001650488.2	XP_001650538	growth hormone-regulated TBC protein 1-A [Aedes aegypti] >ref|XP_021711634.1| growth hormone-regulated TBC protein 1-A [Aedes aegypti] >ref|XP_021711635.1| growth hormone-regulated TBC protein 1-A [Aedes aegypti] >ref|XP_021711636.1| growth hormone-regulated TBC protein 1-A [Aedes aegypti] >ref|XP_021711637.1| growth hormone-regulated TBC protein 1-A [Aedes aegypti] >ref|XP_021711638.1| growth ho…
AAEL004351-RG	Up in N7	XM_021853318.1	XP_021709010	casein kinase I isoform X1 [Aedes aegypti]
AAEL004319-RC	Up in N7	XM_021846944.1	XP_021702636	epidermal growth factor receptor isoform X2 [Aedes aegypti]
AAEL010224-RB	Up in N7	XM_021852907.1	XP_021708599	GATA-binding factor 2 isoform X1 [Aedes aegypti]
AAEL021471-RA	Up in N7	XM_021838620.1	XP_021694312	type I inositol 3,4-bisphosphate 4-phosphatase isoform X2 [Aedes aegypti]
AAEL021622-RA	Up in N7	XR_002501551.1	not available	not available
AAEL008398-RG	Up in N7	XM_021842877.1	XP_021698569	leucine-rich repeat serine/threonine-protein kinase 1 isoform X3 [Aedes aegypti]
AAEL013275-RC	Up in N7	XR_002500774.1	XP_001663434	importin subunit beta isoform X2 [Aedes aegypti] >gb|EAT34489.1| AAEL013275-PA [Aedes aegypti]
AAEL021115-RA	Up in N7	XR_002502280.1	XP_021701094	uncharacterized protein LOC110676656 [Aedes aegypti]
AAEL017116-RD	Up in N7	XR_002501247.1	XP_021705282	hrp65 protein isoform X3 [Aedes aegypti]
AAEL007658-RT	Up in N7	XR_002499157.1	XP_021694691	partitioning defective 3 homolog isoform X6 [Aedes aegypti] >ref|XP_021694692.1| partitioning defective 3 homolog isoform X6 [Aedes aegypti]
AAEL004415-RB	Up in N7	XM_021851898.1	XP_021707590	poly(U)-binding-splicing factor half pint isoform X2 [Aedes aegypti] >ref|XP_021707591.1| poly(U)-binding-splicing factor half pint isoform X2 [Aedes aegypti] >ref|XP_021707592.1| poly(U)-binding-splicing factor half pint isoform X2 [Aedes aegypti] >ref|XP_021707593.1| poly(U)-binding-splicing factor half pint isoform X2 [Aedes aegypti]
AAEL021836-RA	Up in N7	XM_021853679.1	XP_021709369	telomere-associated protein RIF1 isoform X1 [Aedes aegypti]
AAEL012975-RE	Up in N7	XM_021842227.1	XP_021697918	uncharacterized protein LOC5577078 isoform X1 [Aedes aegypti] >ref|XP_021697919.1| uncharacterized protein LOC5577078 isoform X1 [Aedes aegypti]
AAEL000713-RC	Up in N7	XM_021848130.1	XP_021703822	reticulon-1-A isoform X3 [Aedes aegypti]
AAEL005364-RD	Up in N7	XM_021854164.1	XP_021709853	AP-1 complex subunit gamma-1 [Aedes aegypti] >ref|XP_021709854.1| AP-1 complex subunit gamma-1 [Aedes aegypti] >ref|XP_021709855.1| AP-1 complex subunit gamma-1 [Aedes aegypti] >ref|XP_021709856.1| AP-1 complex subunit gamma-1 [Aedes aegypti] >ref|XP_021709857.1| AP-1 complex subunit gamma-1 [Aedes aegypti] >ref|XP_021709858.1| AP-1 complex subunit gamma-1 [Aedes aegypti] >ref|XP_021709859.1| AP-…
AAEL007495-RB	Up in N7	XM_001652751.2	XP_001652801	uncharacterized protein LOC5569239 isoform X2 [Aedes aegypti]
AAEL003064-RC	Up in N7	XM_021843881.1	XP_021699573	glucose-6-phosphate exchanger SLC37A2 isoform X1 [Aedes aegypti]
AAEL003953-RB	Up in N7	XM_021848979.1	XP_021704670	serine/threonine-protein kinase MARK1 isoform X18 [Aedes aegypti] >ref|XP_021704671.1| serine/threonine-protein kinase MARK1 isoform X18 [Aedes aegypti] >ref|XP_021704672.1| serine/threonine-protein kinase MARK1 isoform X18 [Aedes aegypti] >ref|XP_021704673.1| serine/threonine-protein kinase MARK1 isoform X18 [Aedes aegypti]
AAEL025650-RC	Up in N7	XM_021846042.1	XP_021701719	otopetrin-2 isoform X2 [Aedes aegypti]
AAEL018032-RH	Up in N7	XM_021844582.1	XP_021700274	uncharacterized protein KIAA1109 isoform X2 [Aedes aegypti]
AAEL007391-RB	Up in N7	XM_021848435.1	XP_021704127	uncharacterized protein LOC5569132 [Aedes aegypti]
AAEL001220-RC	Up in N7	XM_021847366.1	XP_021703057	myosin-VIIa [Aedes aegypti] >ref|XP_021703058.1| myosin-VIIa [Aedes aegypti]
AAEL009150-RI	Up in N7	XM_021845581.1	XP_021701273	solute carrier family 41 member 1 isoform X6 [Aedes aegypti]
AAEL023321-RA	Up in N7	XM_021837963.1	XP_021693655	heat shock protein 70 A1-like [Aedes aegypti]
AAEL011918-RG	Up in N7	XM_021852867.1	XP_021708558	patatin-like phospholipase domain-containing protein 3 isoform X4 [Aedes aegypti] >ref|XP_021708559.1| patatin-like phospholipase domain-containing protein 3 isoform X4 [Aedes aegypti]
AAEL001321-RB	Up in N7	XM_001652957.2	XP_021710033	transcription factor Dp-1 isoform X1 [Aedes aegypti]
AAEL011905-RB	Up in N7	XM_021852952.1	XP_021708643	myosin-IB isoform X1 [Aedes aegypti]
AAEL011592-RB	Up in N7	XM_021840348.1	XP_021696040	uncharacterized protein LOC5577804 isoform X3 [Aedes aegypti]
AAEL010863-RB	Up in N7	XM_021851782.1	XP_021707474	uncharacterized protein LOC5574018 isoform X1 [Aedes aegypti]
AAEL020373-RB	Up in N7	XM_021857175.1	XP_021694463	uncharacterized protein LOC110674715 [Aedes aegypti] >ref|XP_021694465.1| uncharacterized protein LOC110674715 [Aedes aegypti] >ref|XP_021712867.1| uncharacterized protein LOC5572382 [Aedes aegypti] >ref|XP_021712868.1| uncharacterized protein LOC5572382 [Aedes aegypti]
AAEL009458-RF	Up in N7	XM_021855575.1	XP_001660092	syntaxin-4 isoform X1 [Aedes aegypti] >ref|XP_021711075.1| syntaxin-4 isoform X1 [Aedes aegypti] >gb|EAT38669.1| AAEL009458-PA [Aedes aegypti]
AAEL006476-RB	Up in N7	XM_021844506.1	XP_021700198	zinc finger protein Noc [Aedes aegypti]
AAEL019826-RB	Up in N7	XM_021846574.1	XP_021702265	leupaxin isoform X3 [Aedes aegypti] >ref|XP_021702266.1| leupaxin isoform X3 [Aedes aegypti] >ref|XP_021702267.1| leupaxin isoform X3 [Aedes aegypti] >ref|XP_021702268.1| leupaxin isoform X3 [Aedes aegypti]
AAEL022282-RD	Up in N7	XM_021838005.1	XP_021693697	RNA-binding protein cabeza-like isoform X1 [Aedes aegypti]
AAEL005908-RD	Up in N7	XM_021853067.1	XP_021708759	protein TANC2 isoform X4 [Aedes aegypti]
AAEL005023-RC	Up in N7	XM_021847907.1	XP_001650198	palmitoyltransferase ZDHHC23 isoform X1 [Aedes aegypti] >gb|EAT43529.2| AAEL005023-PA [Aedes aegypti]
AAEL008234-RF	Up in N7	XM_021853444.1	XP_021709132	segment polarity protein dishevelled isoform X1 [Aedes aegypti] >ref|XP_021709133.1| segment polarity protein dishevelled isoform X1 [Aedes aegypti]
AAEL010738-RS	Up in N7	XM_021847301.1	XP_021702990	sodium-driven chloride bicarbonate exchanger isoform X11 [Aedes aegypti]
AAEL024235-RD	Up in N7	XM_021840788.1	XP_021696480	talin-2 isoform X1 [Aedes aegypti] >ref|XP_021696481.1| talin-2 isoform X1 [Aedes aegypti] >ref|XP_021696482.1| talin-2 isoform X1 [Aedes aegypti] >ref|XP_021696483.1| talin-2 isoform X1 [Aedes aegypti]
AAEL014274-RB	Up in N7	XM_021841426.1	XP_021697118	uncharacterized protein LOC5564013 isoform X1 [Aedes aegypti]
AAEL022058-RB	Up in N7	XM_021856609.1	XP_021693200	catenin alpha isoform X2 [Aedes aegypti] >ref|XP_021712301.1| catenin alpha isoform X2 [Aedes aegypti]
AAEL001796-RD	Up in N7	XM_021846775.1	XP_001660403	nuclear hormone receptor HR78 isoform X1 [Aedes aegypti] >ref|XP_021702464.1| nuclear hormone receptor HR78 isoform X1 [Aedes aegypti] >gb|EAT47063.1| AAEL001796-PA [Aedes aegypti]
AAEL019679-RC	Up in N7	XM_021843192.1	XP_021698883	esterase B1 isoform X1 [Aedes aegypti]
AAEL022692-RB	Up in N7	XM_021840416.1	XP_021696108	uncharacterized protein LOC5573286 [Aedes aegypti] >ref|XP_021696110.1| uncharacterized protein LOC5573286 [Aedes aegypti]
AAEL005305-RH	Up in N7	XM_021851551.1	XP_021707240	dnaJ homolog subfamily B member 6 isoform X1 [Aedes aegypti] >ref|XP_021707241.1| dnaJ homolog subfamily B member 6 isoform X1 [Aedes aegypti] >ref|XP_021707242.1| dnaJ homolog subfamily B member 6 isoform X1 [Aedes aegypti] >ref|XP_021707243.1| dnaJ homolog subfamily B member 6 isoform X1 [Aedes aegypti]
AAEL004709-RA	Up in N7	XM_001649601.2	XP_001649651	protein phosphatase 1L isoform X1 [Aedes aegypti] >gb|EAT43857.1| AAEL004709-PA [Aedes aegypti]
AAEL005788-RA	Up in N7	XM_001651384.3	XP_001651434	cytochrome P450 4c21 [Aedes aegypti] >gb|EAT42714.2| AAEL005788-PA [Aedes aegypti]
AAEL013969-RB	Up in N7	XM_021840278.1	XP_021695970	syndecan isoform X1 [Aedes aegypti]
AAEL004719-RB	Up in N7	XM_021846798.1	XP_021702490	uncharacterized protein LOC5565327 isoform X2 [Aedes aegypti] >ref|XP_021702491.1| uncharacterized protein LOC5565327 isoform X2 [Aedes aegypti]
AAEL012621-RE	Up in N7	XM_021837950.1	XP_021693642	serine-arginine protein 55 isoform X4 [Aedes aegypti]
AAEL013863-RJ	Up in N7	XM_021852619.1	XP_021708311	phosphatidylinositol-binding clathrin assembly protein LAP isoform X5 [Aedes aegypti]
AAEL006452-RA	Up in N7	XM_001657761.2	XP_001657811	polypeptide N-acetylgalactosaminyltransferase 3 [Aedes aegypti] >gb|EAT41966.1| AAEL006452-PA [Aedes aegypti]
AAEL004918-RC	Up in N7	XM_021844889.1	XP_001650044	brain tumor protein [Aedes aegypti] >ref|XP_021700580.1| brain tumor protein [Aedes aegypti] >ref|XP_021700581.1| brain tumor protein [Aedes aegypti] >ref|XP_021700582.1| brain tumor protein [Aedes aegypti] >ref|XP_021700583.1| brain tumor protein [Aedes aegypti] >ref|XP_021700584.1| brain tumor protein [Aedes aegypti] >ref|XP_021700585.1| brain tumor protein [Aedes aegypti] >gb|EAT43650.1| AAEL0…
AAEL013466-RG	Up in N7	XM_021846276.1	XP_021701968	ankyrin-2 isoform X6 [Aedes aegypti]
AAEL009991-RD	Up in N7	XM_021851360.1	XP_021707051	myosin-IIIb isoform X1 [Aedes aegypti] >ref|XP_021707052.1| myosin-IIIb isoform X1 [Aedes aegypti] >ref|XP_021707053.1| myosin-IIIb isoform X1 [Aedes aegypti] >ref|XP_021707054.1| myosin-IIIb isoform X1 [Aedes aegypti]
AAEL007260-RB	Up in N7	XM_021854071.1	XP_001652622	zinc finger protein sens isoform X1 [Aedes aegypti] >gb|EAT41067.1| AAEL007260-PA [Aedes aegypti]
AAEL021092-RI	Up in N7	XM_021853928.1	XP_021709620	LIM domain-binding protein 2 isoform X2 [Aedes aegypti]
AAEL024022-RA	Up in N7	XM_021848177.1	XP_021703869	A-kinase anchor protein 10, mitochondrial [Aedes aegypti]
AAEL012062-RP	Up in N7	XM_021837808.1	XP_021693488	sodium/potassium-transporting ATPase subunit alpha isoform X6 [Aedes aegypti] >ref|XP_021693494.1| sodium/potassium-transporting ATPase subunit alpha isoform X6 [Aedes aegypti]
AAEL025391-RB	Up in N7	XM_021848382.1	XP_021704073	uncharacterized protein LOC5569762 isoform X1 [Aedes aegypti]
AAEL012083-RL	Up in N7	XM_021849639.1	XP_021705331	tyrosine-protein phosphatase 10D isoform X4 [Aedes aegypti]
AAEL008275-RB	Up in N7	XM_021851135.1	XP_001659081	alpha-tocopherol transfer protein-like [Aedes aegypti] >ref|XP_021706827.1| alpha-tocopherol transfer protein-like [Aedes aegypti] >gb|EAT39961.1| AAEL008275-PA [Aedes aegypti]
AAEL024528-RI	Up in N7	XM_021840724.1	XP_021696416	unconventional myosin-Va isoform X3 [Aedes aegypti]
AAEL012549-RD	Up in N7	XM_021839286.1	XP_021694978	probable phospholipid-transporting ATPase IF isoform X3 [Aedes aegypti]
AAEL005259-RD	Up in N7	XM_021841159.1	XP_021696851	natterin-4 isoform X3 [Aedes aegypti]
AAEL014732-RD	Up in N7	XM_021845919.1	XP_001649465	homocysteine-responsive endoplasmic reticulum-resident ubiquitin-like domain member 2 protein isoform X1 [Aedes aegypti] >gb|EAT33011.2| AAEL014732-PA [Aedes aegypti]
AAEL007804-RE	Up in N7	XM_021852108.1	XP_021707800	semaphorin-5A [Aedes aegypti] >ref|XP_021707801.1| semaphorin-5A [Aedes aegypti] >ref|XP_021707802.1| semaphorin-5A [Aedes aegypti] >ref|XP_021707803.1| semaphorin-5A [Aedes aegypti]
AAEL005364-RE	Up in N7	XM_021854166.1	XP_021709853	AP-1 complex subunit gamma-1 [Aedes aegypti] >ref|XP_021709854.1| AP-1 complex subunit gamma-1 [Aedes aegypti] >ref|XP_021709855.1| AP-1 complex subunit gamma-1 [Aedes aegypti] >ref|XP_021709856.1| AP-1 complex subunit gamma-1 [Aedes aegypti] >ref|XP_021709857.1| AP-1 complex subunit gamma-1 [Aedes aegypti] >ref|XP_021709858.1| AP-1 complex subunit gamma-1 [Aedes aegypti] >ref|XP_021709859.1| AP-…
AAEL006676-RB	Up in N7	XM_021845901.1	XP_021701593	androgen-induced gene 1 protein isoform X2 [Aedes aegypti]
AAEL009173-RA	Up in N7	XM_001659743.2	XP_001659793	fasciclin-2 isoform X6 [Aedes aegypti]
AAEL000845-RH	Up in N7	XM_021854771.1	XP_021710456	phosphatidylinositol phosphatase PTPRQ [Aedes aegypti] >ref|XP_021710457.1| phosphatidylinositol phosphatase PTPRQ [Aedes aegypti] >ref|XP_021710458.1| phosphatidylinositol phosphatase PTPRQ [Aedes aegypti] >ref|XP_021710459.1| phosphatidylinositol phosphatase PTPRQ [Aedes aegypti] >ref|XP_021710460.1| phosphatidylinositol phosphatase PTPRQ [Aedes aegypti] >ref|XP_021710461.1| phosphatidylinosito…
AAEL025268-RI	Up in N7	XM_021851704.1	XP_021707396	heterogeneous nuclear ribonucleoprotein L isoform X2 [Aedes aegypti]
AAEL005432-RA	Up in N7	XM_001650835.2	XP_001650885	protein mesh isoform X2 [Aedes aegypti]
AAEL027364-RA	Up in N7	XM_021852469.1	EAT39969	AAEL008259-PA [Aedes aegypti]
AAEL008190-RA	Up in N7	XM_001658967.2	XP_001659017	protein atonal homolog 8 [Aedes aegypti] >gb|EAT40047.1| AAEL008190-PA [Aedes aegypti]
AAEL009173-RI	Up in N7	XM_021848464.1	XP_021704154	fasciclin-2 isoform X7 [Aedes aegypti] >ref|XP_021704155.1| fasciclin-2 isoform X7 [Aedes aegypti] >ref|XP_021704156.1| fasciclin-2 isoform X7 [Aedes aegypti] >ref|XP_021704157.1| fasciclin-2 isoform X7 [Aedes aegypti]
AAEL012249-RA	Up in N7	XM_021849790.1	XP_021705482	uncharacterized protein LOC5576016 [Aedes aegypti]
AAEL021711-RE	Up in N7	XM_021857181.1	XP_021712873	vacuolar protein sorting-associated protein 4A isoform X3 [Aedes aegypti]
AAEL008564-RC	Up in N7	XM_021842913.1	XP_021698605	protein cueball isoform X2 [Aedes aegypti]
AAEL024419-RA	Up in N7	XM_021856555.1	XP_021709512	LIM and senescent cell antigen-like-containing domain protein 1 isoform X1 [Aedes aegypti]
AAEL019982-RA	Up in N7	XM_021854122.1	XP_021709814	probable Ras GTPase-activating protein isoform X4 [Aedes aegypti] >ref|XP_021709816.1| probable Ras GTPase-activating protein isoform X4 [Aedes aegypti] >ref|XP_021709817.1| probable Ras GTPase-activating protein isoform X4 [Aedes aegypti] >ref|XP_021709818.1| probable Ras GTPase-activating protein isoform X4 [Aedes aegypti]
AAEL012038-RC	Up in N7	XM_021857415.1	XP_001662163	uncharacterized protein LOC5575726 isoform X1 [Aedes aegypti] >gb|EAT35821.1| AAEL012038-PA [Aedes aegypti]
AAEL022056-RA	Up in N7	XM_021856345.1	XP_021712037	LOW QUALITY PROTEIN: V-type proton ATPase subunit B-like, partial [Aedes aegypti]
AAEL008623-RA	Up in N7	XM_001653318.2	XP_001653368	eRF1 methyltransferase catalytic subunit MTQ2 [Aedes aegypti]
AAEL007147-RB	Up in N7	XM_001658110.2	XP_001658160	uncharacterized protein LOC5568794 [Aedes aegypti] >ref|XP_021703165.1| uncharacterized protein LOC5568794 [Aedes aegypti] >ref|XP_021703166.1| uncharacterized protein LOC5568794 [Aedes aegypti]
AAEL023114-RD	Up in N7	XR_002499692.1	EAT35309	AAEL012504-PA [Aedes aegypti] >gb|EAT35310.1| AAEL012504-PB [Aedes aegypti]
AAEL006095-RC	Up in N7	XM_021852294.1	XP_021707986	gelsolin isoform X3 [Aedes aegypti] >ref|XP_021707987.1| gelsolin isoform X3 [Aedes aegypti]
AAEL018699-RR	Up in N7	XM_021840995.1	XP_021696687	uncharacterized protein LOC5576943 isoform X5 [Aedes aegypti]
AAEL003075-RB	Up in N7	XM_021843908.1	XP_021699600	zinc finger and BTB domain-containing protein 14 isoform X1 [Aedes aegypti]
AAEL013776-RB	Up in N7	XM_021845158.1	XP_021700849	uncharacterized protein LOC5578593 [Aedes aegypti] >ref|XP_021700850.1| uncharacterized protein LOC5578593 [Aedes aegypti]
AAEL006341-RB	Up in N7	XR_002502665.1	EAT42074	AAEL006341-PA [Aedes aegypti]
AAEL026564-RA	Up in N7	XM_021844835.1	XP_021700527	32 kDa beta-galactoside-binding lectin-like [Aedes aegypti] >gb|EAT45187.1| AAEL003541-PA [Aedes aegypti]
AAEL022437-RA	Up in N7	XR_002501645.1	not available	not available
AAEL010145-RC	Up in N7	XM_011494770.2	XP_011493072	sodium/potassium-transporting ATPase subunit beta-2 isoform X1 [Aedes aegypti] >gb|EJY57851.1| AAEL010145-PC [Aedes aegypti]
AAEL004874-RB	Up in N7	XM_021838103.1	XP_021693795	LIM domain-containing protein jub isoform X1 [Aedes aegypti]
AAEL009477-RC	Up in N7	XM_021843274.1	XP_021698966	uncharacterized protein LOC5572004 isoform X3 [Aedes aegypti]
AAEL001434-RJ	Up in N7	XM_021840747.1	XP_021696433	coronin-1C isoform X3 [Aedes aegypti]
AAEL005845-RB	Up in N7	XM_021852812.1	XP_021708504	LOW QUALITY PROTEIN: spectrin beta chain [Aedes aegypti]
AAEL013863-RE	Up in N7	XM_021852617.1	XP_021708309	phosphatidylinositol-binding clathrin assembly protein LAP isoform X3 [Aedes aegypti]
AAEL000874-RD	Up in N7	XM_021854412.1	XP_021710103	uncharacterized protein LOC5567237 isoform X1 [Aedes aegypti] >ref|XP_021710104.1| uncharacterized protein LOC5567237 isoform X1 [Aedes aegypti] >ref|XP_021710105.1| uncharacterized protein LOC5567237 isoform X1 [Aedes aegypti] >ref|XP_021710106.1| uncharacterized protein LOC5567237 isoform X1 [Aedes aegypti]
AAEL004415-RE	Up in N7	XM_021851901.1	XP_021707590	poly(U)-binding-splicing factor half pint isoform X2 [Aedes aegypti] >ref|XP_021707591.1| poly(U)-binding-splicing factor half pint isoform X2 [Aedes aegypti] >ref|XP_021707592.1| poly(U)-binding-splicing factor half pint isoform X2 [Aedes aegypti] >ref|XP_021707593.1| poly(U)-binding-splicing factor half pint isoform X2 [Aedes aegypti]
AAEL007658-RI	Up in N7	XM_021838988.1	XP_021694680	partitioning defective 3 homolog isoform X3 [Aedes aegypti]
AAEL002781-RJ	Up in N7	XM_021849467.1	XP_021705158	galactokinase isoform X2 [Aedes aegypti] >gb|EAT45949.1| AAEL002781-PB [Aedes aegypti]
AAEL010778-RC	Up in N7	XM_001654826.2	XP_001654876	protein rolling stone [Aedes aegypti] >ref|XP_021701284.1| protein rolling stone [Aedes aegypti] >ref|XP_021701285.1| protein rolling stone [Aedes aegypti] >ref|XP_021701286.1| protein rolling stone [Aedes aegypti] >ref|XP_021701287.1| protein rolling stone [Aedes aegypti] >gb|EAT37204.1| AAEL010778-PB [Aedes aegypti] >gb|EAT37205.1| AAEL010778-PA [Aedes aegypti]
AAEL027514-RA	Up in N7	XM_021853618.1	XP_021709310	uncharacterized protein LOC110679302 isoform X1 [Aedes aegypti]
AAEL001434-RF	Up in N7	XM_021840742.1	XP_021696433	coronin-1C isoform X3 [Aedes aegypti]
AAEL009323-RB	Up in N7	XM_021853832.1	XP_021709524	putative carbonic anhydrase 3 [Aedes aegypti]
AAEL007595-RD	Up in N7	XM_021838361.1	XP_021694053	cellular tumor antigen p53 isoform X2 [Aedes aegypti]
AAEL006815-RA	Up in N7	XM_001652166.2	XP_001652216	probable cytochrome P450 9f2 [Aedes aegypti] >gb|EAT41567.1| AAEL006815-PA [Aedes aegypti]
AAEL009055-RB	Up in N7	XM_021845049.1	XP_021700741	LOW QUALITY PROTEIN: cholinesterase [Aedes aegypti]
AAEL026236-RA	Up in N7	XR_002500418.1	not available	not available
AAEL019654-RB	Up in N7	XM_021855193.1	XP_021710885	IQ motif and SEC7 domain-containing protein 1 isoform X1 [Aedes aegypti]
AAEL000649-RG	Up in N7	XM_021854858.1	XP_001649773	transmembrane protein 64 [Aedes aegypti] >ref|XP_021710545.1| transmembrane protein 64 [Aedes aegypti] >ref|XP_021710546.1| transmembrane protein 64 [Aedes aegypti] >ref|XP_021710547.1| transmembrane protein 64 [Aedes aegypti] >ref|XP_021710548.1| transmembrane protein 64 [Aedes aegypti] >ref|XP_021710549.1| transmembrane protein 64 [Aedes aegypti] >ref|XP_021710550.1| transmembrane protein 64 [A…
AAEL024235-RG	Up in N7	XM_021840789.1	XP_021696480	talin-2 isoform X1 [Aedes aegypti] >ref|XP_021696481.1| talin-2 isoform X1 [Aedes aegypti] >ref|XP_021696482.1| talin-2 isoform X1 [Aedes aegypti] >ref|XP_021696483.1| talin-2 isoform X1 [Aedes aegypti]
AAEL004448-RB	Up in N7	XM_021855161.1	XP_021710853	torsin-like protein isoform X1 [Aedes aegypti]
AAEL000930-RC	Up in N7	XM_001657415.2	XP_001657465	calcium channel flower isoform X2 [Aedes aegypti] >gb|EAT47963.1| AAEL000930-PC [Aedes aegypti]
AAEL022076-RF	Up in N7	XM_021855816.1	XP_021711508	putative epidermal cell surface receptor isoform X5 [Aedes aegypti] >ref|XP_021711509.1| putative epidermal cell surface receptor isoform X5 [Aedes aegypti]
AAEL024532-RA	Up in N7	XM_021840819.1	XP_021696511	toll-like receptor 6 isoform X2 [Aedes aegypti]
AAEL029102-RA	Up in N7	XM_001657246.2	XP_021708703	uncharacterized protein LOC5579101 isoform X1 [Aedes aegypti]
AAEL019529-RE	Up in N7	XM_021839931.1	XP_021695618	splicing factor 3B subunit 3 isoform X1 [Aedes aegypti] >ref|XP_021695619.1| splicing factor 3B subunit 3 isoform X1 [Aedes aegypti] >ref|XP_021695620.1| splicing factor 3B subunit 3 isoform X1 [Aedes aegypti] >ref|XP_021695621.1| splicing factor 3B subunit 3 isoform X1 [Aedes aegypti] >ref|XP_021695622.1| splicing factor 3B subunit 3 isoform X1 [Aedes aegypti] >ref|XP_021695623.1| splicing facto…
AAEL010224-RE	Up in N7	XM_021852910.1	XP_021708599	GATA-binding factor 2 isoform X1 [Aedes aegypti]
AAEL009171-RA	Up in N7	XM_001659741.2	XP_001659791	protein CREBRF homolog isoform X2 [Aedes aegypti] >gb|EAT38994.1| AAEL009171-PA [Aedes aegypti]
AAEL021583-RA	Up in N7	XR_002498664.1	KXJ77950	hypothetical protein RP20_CCG006063 [Aedes albopictus]
AAEL010508-RF	Up in N7	XM_021841517.1	XP_021697209	vacuolar protein sorting-associated protein 13C isoform X6 [Aedes aegypti]
AAEL006216-RF	Up in N7	XM_021840807.1	XP_021696490	glycogen-binding subunit 76A isoform X1 [Aedes aegypti]
AAEL020697-RA	Up in N7	XR_002498808.1	not available	not available
AAEL003039-RA	Up in N7	XM_001662946.2	XP_001662996	60S ribosomal export protein NMD3 [Aedes aegypti] >gb|EAT45726.1| AAEL003039-PA [Aedes aegypti]
AAEL025065-RF	Up in N7	XM_021840942.1	XP_021696636	serine/arginine repetitive matrix protein 5 isoform X6 [Aedes aegypti]
AAEL006832-RB	Up in N7	XM_021850267.1	XP_021705959	frizzled-3 [Aedes aegypti]
AAEL009043-RA	Up in N7	XM_001653620.2	XP_001653670	bicaudal D-related protein homolog isoform X1 [Aedes aegypti] >ref|XP_021708887.1| bicaudal D-related protein homolog isoform X1 [Aedes aegypti] >ref|XP_021708888.1| bicaudal D-related protein homolog isoform X1 [Aedes aegypti] >ref|XP_021708889.1| bicaudal D-related protein homolog isoform X1 [Aedes aegypti] >ref|XP_021708890.1| bicaudal D-related protein homolog isoform X1 [Aedes aegypti] >gb|E…
AAEL020878-RF	Up in N7	XM_021842330.1	XP_021698022	large proline-rich protein BAG6 isoform X5 [Aedes aegypti]
AAEL008141-RB	Up in N7	XM_021854834.1	XP_021710526	period circadian protein isoform X1 [Aedes aegypti]
AAEL017435-RA	Up in N7	XM_011495471.2	XP_011493773	uncharacterized protein LOC23687855 [Aedes aegypti]
AAEL012412-RA	Up in N7	XM_021842433.1	EAT35420	AAEL012412-PA [Aedes aegypti]
AAEL001119-RC	Up in N7	XM_021854404.1	XP_021710096	DNA-binding protein P3A2 isoform X2 [Aedes aegypti]
AAEL018214-RD	Up in N7	XM_021849776.1	XP_021705465	FERM, RhoGEF and pleckstrin domain-containing protein 2 [Aedes aegypti] >ref|XP_021705466.1| FERM, RhoGEF and pleckstrin domain-containing protein 2 [Aedes aegypti] >ref|XP_021705467.1| FERM, RhoGEF and pleckstrin domain-containing protein 2 [Aedes aegypti] >ref|XP_021705468.1| FERM, RhoGEF and pleckstrin domain-containing protein 2 [Aedes aegypti]
AAEL026791-RC	Up in N7	XM_021840951.1	EAT41854	AAEL006544-PA [Aedes aegypti]
AAEL025570-RA	Up in N7	XM_021845417.1	XP_021701109	myosin-IA [Aedes aegypti] >ref|XP_021701110.1| myosin-IA [Aedes aegypti] >ref|XP_021701112.1| myosin-IA [Aedes aegypti] >ref|XP_021701113.1| myosin-IA [Aedes aegypti] >ref|XP_021701114.1| myosin-IA [Aedes aegypti] >ref|XP_021701115.1| myosin-IA [Aedes aegypti] >ref|XP_021701116.1| myosin-IA [Aedes aegypti] >ref|XP_021701117.1| myosin-IA [Aedes aegypti]
AAEL014970-RB	Up in N7	XM_021848237.1	XP_021703929	bromodomain-containing protein 4 [Aedes aegypti]
AAEL024598-RD	Up in N7	XM_021843527.1	XP_021699219	PDZ and LIM domain protein 7 isoform X4 [Aedes aegypti]
AAEL011102-RA	Up in N7	XM_001661371.2	XP_001661421	lysosomal-associated transmembrane protein 4B isoform X1 [Aedes aegypti] >ref|XP_021700102.1| lysosomal-associated transmembrane protein 4B isoform X1 [Aedes aegypti]
AAEL024675-RB	Up in N7	XM_021844839.1	EAT45185	AAEL003512-PA [Aedes aegypti]
AAEL025368-RA	Up in N7	XM_021856669.1	XP_021712359	uncharacterized protein LOC110680878 isoform X1 [Aedes aegypti]
AAEL009895-RC	Up in N7	XM_021849950.1	XP_021705640	endothelin-converting enzyme homolog isoform X1 [Aedes aegypti] >ref|XP_021705641.1| endothelin-converting enzyme homolog isoform X1 [Aedes aegypti] >ref|XP_021705642.1| endothelin-converting enzyme homolog isoform X1 [Aedes aegypti]
AAEL005615-RB	Up in N7	XM_021839823.1	XP_021695515	uncharacterized protein LOC5566746 [Aedes aegypti]
AAEL019445-RA	Up in N7	XM_021850231.1	XP_021705923	prostaglandin E2 receptor EP4 subtype isoform X1 [Aedes aegypti]
AAEL003971-RA	Up in N7	XM_001648071.2	XP_001648121	uncharacterized protein LOC5579808 [Aedes aegypti]
AAEL008260-RD	Up in N7	XM_021850959.1	XP_001659085	uncharacterized protein LOC5570368 isoform X1 [Aedes aegypti] >ref|XP_021706649.1| uncharacterized protein LOC5570368 isoform X1 [Aedes aegypti] >ref|XP_021706650.1| uncharacterized protein LOC5570368 isoform X1 [Aedes aegypti] >ref|XP_021706651.1| uncharacterized protein LOC5570368 isoform X1 [Aedes aegypti] >ref|XP_021706653.1| uncharacterized protein LOC5570368 isoform X1 [Aedes aegypti]
AAEL019772-RA	Up in N7	XM_021844546.1	XP_021700238	protein outspread isoform X1 [Aedes aegypti]
AAEL012513-RL	Up in N7	XM_021841269.1	XP_021696961	calcium-binding protein E63-1 isoform X5 [Aedes aegypti] >ref|XP_021696962.1| calcium-binding protein E63-1 isoform X5 [Aedes aegypti] >ref|XP_021696963.1| calcium-binding protein E63-1 isoform X5 [Aedes aegypti] >ref|XP_021696964.1| calcium-binding protein E63-1 isoform X5 [Aedes aegypti] >ref|XP_021696965.1| calcium-binding protein E63-1 isoform X5 [Aedes aegypti] >ref|XP_021696966.1| calcium-b…
AAEL025177-RA	Up in N7	XM_021853035.1	XP_021695636	tigger transposable element-derived protein 6-like [Aedes aegypti]
AAEL019512-RH	Up in N7	XM_021848683.1	XP_021704373	MAGUK p55 subfamily member 5-A isoform X4 [Aedes aegypti] >ref|XP_021704374.1| MAGUK p55 subfamily member 5-A isoform X4 [Aedes aegypti] >ref|XP_021704375.1| MAGUK p55 subfamily member 5-A isoform X4 [Aedes aegypti] >ref|XP_021704376.1| MAGUK p55 subfamily member 5-A isoform X4 [Aedes aegypti] >ref|XP_021704377.1| MAGUK p55 subfamily member 5-A isoform X4 [Aedes aegypti] >ref|XP_021704378.1| MAGU…
AAEL017226-RC	Up in N7	XM_021850361.1	XP_011493504	lysosomal alpha-glucosidase [Aedes aegypti] >ref|XP_021706052.1| lysosomal alpha-glucosidase [Aedes aegypti] >ref|XP_021706053.1| lysosomal alpha-glucosidase [Aedes aegypti] >ref|XP_021706055.1| lysosomal alpha-glucosidase [Aedes aegypti] >ref|XP_021706056.1| lysosomal alpha-glucosidase [Aedes aegypti] >ref|XP_021706057.1| lysosomal alpha-glucosidase [Aedes aegypti] >ref|XP_021706058.1| lysosomal…
AAEL001503-RC	Up in N7	XM_021844924.1	XP_021700616	sodium/hydrogen exchanger 3 isoform X8 [Aedes aegypti]
AAEL019512-RE	Up in N7	XM_021848682.1	XP_021704373	MAGUK p55 subfamily member 5-A isoform X4 [Aedes aegypti] >ref|XP_021704374.1| MAGUK p55 subfamily member 5-A isoform X4 [Aedes aegypti] >ref|XP_021704375.1| MAGUK p55 subfamily member 5-A isoform X4 [Aedes aegypti] >ref|XP_021704376.1| MAGUK p55 subfamily member 5-A isoform X4 [Aedes aegypti] >ref|XP_021704377.1| MAGUK p55 subfamily member 5-A isoform X4 [Aedes aegypti] >ref|XP_021704378.1| MAGU…
AAEL007271-RG	Up in N7	XM_021845706.1	XP_021701391	carbohydrate-responsive element-binding protein isoform X1 [Aedes aegypti] >ref|XP_021701392.1| carbohydrate-responsive element-binding protein isoform X1 [Aedes aegypti] >ref|XP_021701393.1| carbohydrate-responsive element-binding protein isoform X1 [Aedes aegypti] >ref|XP_021701394.1| carbohydrate-responsive element-binding protein isoform X1 [Aedes aegypti] >ref|XP_021701395.1| carbohydrate-re…
AAEL011898-RC	Up in N7	XM_021848033.1	XP_021703720	1-acyl-sn-glycerol-3-phosphate acyltransferase alpha [Aedes aegypti] >ref|XP_021703721.1| 1-acyl-sn-glycerol-3-phosphate acyltransferase alpha [Aedes aegypti] >ref|XP_021703722.1| 1-acyl-sn-glycerol-3-phosphate acyltransferase alpha [Aedes aegypti] >ref|XP_021703723.1| 1-acyl-sn-glycerol-3-phosphate acyltransferase alpha [Aedes aegypti] >ref|XP_021703724.1| 1-acyl-sn-glycerol-3-phosphate acyltran…
AAEL011918-RD	Up in N7	XM_021852863.1	XP_021708554	uncharacterized protein LOC5580214 isoform X1 [Aedes aegypti] >ref|XP_021708555.1| uncharacterized protein LOC5580214 isoform X1 [Aedes aegypti]
AAEL003487-RE	Up in N7	XM_021839968.1	XP_021695658	arf-GAP with SH3 domain, ANK repeat and PH domain-containing protein 2 isoform X1 [Aedes aegypti] >ref|XP_021695659.1| arf-GAP with SH3 domain, ANK repeat and PH domain-containing protein 2 isoform X1 [Aedes aegypti] >ref|XP_021695660.1| arf-GAP with SH3 domain, ANK repeat and PH domain-containing protein 2 isoform X1 [Aedes aegypti] >ref|XP_021695661.1| arf-GAP with SH3 domain, ANK repeat and PH…
AAEL012536-RD	Up in N7	XM_021841351.1	EAT35281	AAEL012536-PA [Aedes aegypti]
AAEL017498-RB	Up in N7	XM_021854137.1	XP_021709829	caspase-8 [Aedes aegypti]
AAEL007996-RD	Up in N7	XM_021840555.1	XP_001658794	arf-GAP with dual PH domain-containing protein 1 [Aedes aegypti] >ref|XP_021696245.1| arf-GAP with dual PH domain-containing protein 1 [Aedes aegypti] >ref|XP_021696246.1| arf-GAP with dual PH domain-containing protein 1 [Aedes aegypti] >ref|XP_021696247.1| arf-GAP with dual PH domain-containing protein 1 [Aedes aegypti] >ref|XP_021696248.1| arf-GAP with dual PH domain-containing protein 1 [Aedes…
AAEL006675-RD	Up in N7	XM_021845877.1	XP_021701569	ELAV-like protein 3 isoform X1 [Aedes aegypti] >ref|XP_021701570.1| ELAV-like protein 3 isoform X1 [Aedes aegypti] >ref|XP_021701571.1| ELAV-like protein 3 isoform X1 [Aedes aegypti] >ref|XP_021701572.1| ELAV-like protein 3 isoform X1 [Aedes aegypti]
AAEL026492-RA	Up in N7	XM_021849221.1	XP_021693054	NTF2-related export protein-like [Aedes aegypti] >ref|XP_021704913.1| NTF2-related export protein-like [Aedes aegypti]
AAEL004025-RH	Up in N7	XR_002502655.1	XP_039446512	glucose dehydrogenase [FAD, quinone]-like isoform X6 [Culex pipiens pallens]
AAEL002307-RA	Up in N7	XM_001661212.2	XP_001661262	leucine-rich repeat neuronal protein 3 isoform X2 [Aedes aegypti] >gb|EAT46547.1| AAEL002307-PA [Aedes aegypti]
AAEL003098-RA	Up in N7	XM_001663115.2	XP_001663165	UDP-glucuronosyltransferase 2B13 [Aedes aegypti]
AAEL006786-RG	Up in N7	XM_021854479.1	XP_001652240	ras-like GTP-binding protein RhoL [Aedes aegypti] >ref|XP_001652242.1| ras-like GTP-binding protein RhoL [Aedes aegypti] >ref|XP_021710171.1| ras-like GTP-binding protein RhoL [Aedes aegypti] >ref|XP_021710172.1| ras-like GTP-binding protein RhoL [Aedes aegypti] >ref|XP_021710173.1| ras-like GTP-binding protein RhoL [Aedes aegypti] >ref|XP_021710174.1| ras-like GTP-binding protein RhoL [Aedes aeg…
AAEL007092-RD	Up in N7	XM_021842355.1	XP_001658122	putative phospholipase B-like lamina ancestor [Aedes aegypti] >ref|XP_021698045.1| putative phospholipase B-like lamina ancestor [Aedes aegypti] >ref|XP_021698046.1| putative phospholipase B-like lamina ancestor [Aedes aegypti] >ref|XP_021698047.1| putative phospholipase B-like lamina ancestor [Aedes aegypti] >ref|XP_021698048.1| putative phospholipase B-like lamina ancestor [Aedes aegypti] >gb|E…
AAEL006667-RD	Up in N7	XM_021845907.1	XP_021701597	ethanolaminephosphotransferase 1 isoform X1 [Aedes aegypti] >ref|XP_021701598.1| ethanolaminephosphotransferase 1 isoform X1 [Aedes aegypti] >ref|XP_021701599.1| ethanolaminephosphotransferase 1 isoform X1 [Aedes aegypti] >ref|XP_021701600.1| ethanolaminephosphotransferase 1 isoform X1 [Aedes aegypti] >ref|XP_021701601.1| ethanolaminephosphotransferase 1 isoform X1 [Aedes aegypti] >ref|XP_0217016…
AAEL006234-RC	Up in N7	XM_021854938.1	XP_001651839	beta-1,3-galactosyltransferase 5 isoform X2 [Aedes aegypti] >ref|XP_021710630.1| beta-1,3-galactosyltransferase 5 isoform X2 [Aedes aegypti] >gb|EAT42205.1| AAEL006234-PA [Aedes aegypti]
AAEL006886-RB	Up in N7	XM_021840292.1	EAT41477	AAEL006886-PA [Aedes aegypti]
AAEL027728-RA	Up in N7	XM_021846729.1	XP_021702421	pollen-specific leucine-rich repeat extensin-like protein 1 [Aedes aegypti]
AAEL025742-RA	Up in N7	XR_002501428.1	not available	not available
AAEL014613-RA	Up in N7	XM_001649048.2	XP_001649098	probable cytochrome P450 9f2 [Aedes aegypti]
AAEL007525-RA	Up in N7	XM_001652760.2	XP_001652810	ras-related protein Rab-43 [Aedes aegypti] >gb|EAT40760.1| AAEL007525-PA [Aedes aegypti]
AAEL023082-RA	Up in N7	XR_002502536.1	not available	not available
AAEL010793-RC	Up in N7	XM_021854315.1	XP_021710007	F-box/LRR-repeat protein 7 isoform X2 [Aedes aegypti] >ref|XP_021710013.1| F-box/LRR-repeat protein 7 isoform X2 [Aedes aegypti]
AAEL001356-RC	Up in N7	XR_002499604.1	XP_019548716	probable splicing factor, arginine/serine-rich 5 isoform X1 [Aedes albopictus] >ref|XP_029733589.1| probable splicing factor, arginine/serine-rich 5 isoform X1 [Aedes albopictus] >ref|XP_029733590.1| probable splicing factor, arginine/serine-rich 5 isoform X1 [Aedes albopictus]
AAEL005726-RB	Up in N7	XM_021847092.1	XP_021702784	active breakpoint cluster region-related protein isoform X3 [Aedes aegypti] >ref|XP_021702786.1| active breakpoint cluster region-related protein isoform X3 [Aedes aegypti] >ref|XP_021702794.1| active breakpoint cluster region-related protein isoform X3 [Aedes aegypti]
AAEL021878-RA	Up in N7	XM_021843503.1	XP_021699195	gastrula zinc finger protein XlCGF8.2DB isoform X1 [Aedes aegypti] >ref|XP_021699197.1| gastrula zinc finger protein XlCGF8.2DB isoform X1 [Aedes aegypti]
AAEL002055-RA	Up in N7	XM_001654507.2	XP_001654557	neuroendocrine protein 7B2 [Aedes aegypti] >gb|EAT46754.1| AAEL002055-PA [Aedes aegypti]
AAEL027408-RC	Up in N7	XM_021844022.1	XP_021699714	TRPL translocation defect protein 14 isoform X3 [Aedes aegypti]
AAEL003873-RB	Up in N7	XM_001664234.2	XP_001664284	glycerol-3-phosphate dehydrogenase, mitochondrial isoform X1 [Aedes aegypti] >ref|XP_021706766.1| glycerol-3-phosphate dehydrogenase, mitochondrial isoform X1 [Aedes aegypti] >gb|EAT44797.1| AAEL003873-PB [Aedes aegypti]
AAEL021333-RA	Up in N7	XM_021851956.1	XP_021707648	dual specificity mitogen-activated protein kinase kinase hemipterous isoform X2 [Aedes aegypti]
AAEL010661-RH	Up in N7	XM_021842513.1	XP_021698205	phospholipid scramblase 1 isoform X5 [Aedes aegypti]
AAEL026887-RB	Up in N7	XR_002502106.1	XP_021712829	uncharacterized protein LOC110681391 [Aedes aegypti]
AAEL007364-RA	Up in N7	XM_001658269.2	XP_001658319	8-oxo-dGDP phosphatase NUDT18 [Aedes aegypti] >gb|EAT40954.1| AAEL007364-PA [Aedes aegypti]
AAEL006904-RB	Up in N7	XM_021846075.1	XP_021701767	uncharacterized protein LOC5568491 isoform X2 [Aedes aegypti]
AAEL020013-RB	Up in N7	XM_021847973.1	XP_021703665	zinc finger protein 431 isoform X1 [Aedes aegypti]
AAEL023522-RA	Up in N7	XR_002502777.1	not available	not available
AAEL005955-RB	Up in N7	XM_021854141.1	XP_021709833	caspase-3 [Aedes aegypti]
AAEL019501-RD	Up in N7	XM_021852715.1	XP_021708406	A disintegrin and metalloproteinase with thrombospondin motifs 9 isoform X1 [Aedes aegypti] >ref|XP_021708407.1| A disintegrin and metalloproteinase with thrombospondin motifs 9 isoform X1 [Aedes aegypti]
AAEL024034-RA	Up in N7	XR_002502638.1	not available	not available
AAEL021450-RA	Up in N7	XM_021854877.1	XP_021710569	N-acetylgalactosaminyltransferase 6 [Aedes aegypti]
AAEL009487-RA	Up in N7	XM_001660052.2	XP_001660102	uncharacterized protein LOC5571997 [Aedes aegypti]
AAEL012093-RC	Up in N7	XM_021842550.1	XP_021698241	uncharacterized protein LOC5575820 isoform X1 [Aedes aegypti]
AAEL000405-RB	Up in N7	XM_021855178.1	XP_021710867	teneurin-m isoform X6 [Aedes aegypti]
AAEL010382-RA	Up in N7	XM_001654461.2	XP_001654511	xanthine dehydrogenase/oxidase [Aedes aegypti]
AAEL004692-RB	Up in N7	XM_001649549.2	XP_001649599	otopetrin-2 isoform X2 [Aedes aegypti]
AAEL005666-RK	Up in N7	XM_021842399.1	XP_001651241	matrix metalloproteinase-14 isoform X1 [Aedes aegypti] >ref|XP_021698081.1| matrix metalloproteinase-14 isoform X1 [Aedes aegypti] >ref|XP_021698082.1| matrix metalloproteinase-14 isoform X1 [Aedes aegypti] >ref|XP_021698084.1| matrix metalloproteinase-14 isoform X1 [Aedes aegypti] >ref|XP_021698085.1| matrix metalloproteinase-14 isoform X1 [Aedes aegypti] >ref|XP_021698086.1| matrix metalloprote…
AAEL009567-RA	Up in N7	XM_001660183.2	XP_001660233	apolipoprotein D [Aedes aegypti]
AAEL005493-RA	Up in N7	XM_021848495.1	XP_021704187	septin-1 isoform X1 [Aedes aegypti]
AAEL017445-RD	Up in N7	XM_021848315.1	XP_021704007	protein nubbin isoform X2 [Aedes aegypti]
AAEL026934-RA	Up in N7	XR_002498700.1	KXJ68854	hypothetical protein RP20_CCG001428 [Aedes albopictus]
AAEL021581-RD	Up in N7	XM_021855345.1	XP_021711034	bcl-2-related ovarian killer protein [Aedes aegypti] >ref|XP_021711035.1| bcl-2-related ovarian killer protein [Aedes aegypti] >ref|XP_021711036.1| bcl-2-related ovarian killer protein [Aedes aegypti] >ref|XP_021711037.1| bcl-2-related ovarian killer protein [Aedes aegypti] >ref|XP_021711038.1| bcl-2-related ovarian killer protein [Aedes aegypti] >ref|XP_021711039.1| bcl-2-related ovarian killer …
AAEL017374-RA	Up in N7	XM_011495351.2	XP_011493653	probable G-protein coupled receptor Mth-like 1 isoform X1 [Aedes aegypti] >ref|XP_021703765.1| probable G-protein coupled receptor Mth-like 1 isoform X1 [Aedes aegypti] >ref|XP_021703766.1| probable G-protein coupled receptor Mth-like 1 isoform X1 [Aedes aegypti] >ref|XP_021703767.1| probable G-protein coupled receptor Mth-like 1 isoform X1 [Aedes aegypti]
AAEL000181-RC	Up in N7	XM_021853632.1	XP_021709324	protein polybromo-1 isoform X10 [Aedes aegypti]
AAEL005305-RD	Up in N7	XM_021851553.1	XP_021707245	dnaJ homolog subfamily B member 6-B isoform X3 [Aedes aegypti] >ref|XP_021707246.1| dnaJ homolog subfamily B member 6-B isoform X3 [Aedes aegypti] >gb|EAT43261.1| AAEL005305-PA [Aedes aegypti]
AAEL021782-RA	Up in N7	XM_021844844.1	XP_021700536	LOW QUALITY PROTEIN: rho GTPase-activating protein conundrum [Aedes aegypti]
AAEL027633-RA	Up in N7	XR_002502287.1	EAT44402	AAEL004208-PA [Aedes aegypti]
AAEL010067-RA	Up in N7	XM_001660568.2	XP_001660618	protransforming growth factor alpha [Aedes aegypti]
AAEL022806-RE	Up in N7	XM_021844016.1	XP_021699699	leucine-rich repeat flightless-interacting protein 2 isoform X1 [Aedes aegypti] >ref|XP_021699708.1| leucine-rich repeat flightless-interacting protein 2 isoform X1 [Aedes aegypti] >ref|XP_021699716.1| leucine-rich repeat flightless-interacting protein 2 isoform X1 [Aedes aegypti] >ref|XP_021699723.1| leucine-rich repeat flightless-interacting protein 2 isoform X1 [Aedes aegypti]
AAEL009895-RD	Up in N7	XM_021849948.1	XP_021705640	endothelin-converting enzyme homolog isoform X1 [Aedes aegypti] >ref|XP_021705641.1| endothelin-converting enzyme homolog isoform X1 [Aedes aegypti] >ref|XP_021705642.1| endothelin-converting enzyme homolog isoform X1 [Aedes aegypti]
AAEL014019-RA	Up in N7	XM_001664189.3	XP_001664239	probable cytochrome P450 4ac1 isoform X2 [Aedes aegypti] >gb|EAT33703.2| AAEL014019-PA [Aedes aegypti]
AAEL013729-RE	Up in N7	XM_021855846.1	XP_021711538	serine/threonine-protein kinase Genghis Khan isoform X2 [Aedes aegypti]
AAEL000719-RB	Up in N7	XM_021848152.1	XP_021703844	rho guanine nucleotide exchange factor 7 isoform X4 [Aedes aegypti]
AAEL019684-RA	Up in N7	XM_021838144.1	XP_021693836	uncharacterized protein LOC23687557 [Aedes aegypti]
AAEL008726-RB	Up in N7	XM_021852544.1	XP_001653421	uncharacterized protein LOC5570993 [Aedes aegypti] >ref|XP_021708236.1| uncharacterized protein LOC5570993 [Aedes aegypti]
AAEL001543-RD	Up in N7	XM_021840128.1	XP_021695818	uncharacterized protein LOC5571300 isoform X1 [Aedes aegypti]
AAEL004559-RG	Up in N7	XR_002501286.1	XP_029733694	synaptosomal-associated protein 25 isoform X4 [Aedes albopictus]
AAEL026118-RA	Up in N7	XM_021843428.1	XP_021699115	uncharacterized protein LOC5576069 [Aedes aegypti] >ref|XP_021699116.1| uncharacterized protein LOC5576069 [Aedes aegypti] >ref|XP_021699117.1| uncharacterized protein LOC5576069 [Aedes aegypti] >ref|XP_021699118.1| uncharacterized protein LOC5576069 [Aedes aegypti] >ref|XP_021699119.1| uncharacterized protein LOC5576069 [Aedes aegypti] >ref|XP_021699120.1| uncharacterized protein LOC5576069 [Aed…
AAEL010977-RA	Up in N7	XM_001661170.2	XP_001661220	ATP-binding cassette sub-family F member 2 [Aedes aegypti] >ref|XP_021709052.1| ATP-binding cassette sub-family F member 2 [Aedes aegypti] >gb|EAT36980.1| AAEL010977-PA [Aedes aegypti]
AAEL001616-RA	Up in N7	XM_021848406.1	XP_021704098	vesicle-fusing ATPase 1 [Aedes aegypti] >ref|XP_021704099.1| vesicle-fusing ATPase 1 [Aedes aegypti] >gb|EAT47276.1| AAEL001616-PA [Aedes aegypti]
AAEL015124-RB	Up in N7	XM_001650659.2	XP_001650709	uncharacterized protein LOC5566324 [Aedes aegypti] >gb|EAT32661.1| AAEL015124-PA [Aedes aegypti]
AAEL018161-RN	Up in N7	XM_021852634.1	XP_021708325	uncharacterized protein LOC5570887 isoform X1 [Aedes aegypti] >ref|XP_021708326.1| uncharacterized protein LOC5570887 isoform X1 [Aedes aegypti]
AAEL000523-RG	Up in N7	XM_021854258.1	XP_021709948	RING finger protein 44 isoform X1 [Aedes aegypti] >ref|XP_021709950.1| RING finger protein 44 isoform X1 [Aedes aegypti] >ref|XP_021709951.1| RING finger protein 44 isoform X1 [Aedes aegypti] >ref|XP_021709952.1| RING finger protein 44 isoform X1 [Aedes aegypti] >ref|XP_021709953.1| RING finger protein 44 isoform X1 [Aedes aegypti] >ref|XP_021709954.1| RING finger protein 44 isoform X1 [Aedes aeg…
AAEL001252-RB	Up in N7	XM_021842772.1	XP_021698465	rap1 GTPase-GDP dissociation stimulator 1 isoform X3 [Aedes aegypti]
AAEL001166-RB	Up in N7	XM_021845627.1	XP_021701319	protein phosphatase 1 regulatory subunit 7 isoform X1 [Aedes aegypti]
AAEL004496-RB	Up in N7	XM_021848062.1	XP_021703753	excitatory amino acid transporter 3 isoform X1 [Aedes aegypti] >ref|XP_021703754.1| excitatory amino acid transporter 3 isoform X1 [Aedes aegypti] >ref|XP_021703755.1| excitatory amino acid transporter 3 isoform X1 [Aedes aegypti]
AAEL002859-RB	Up in N7	XM_021837621.1	XP_021693313	LOW QUALITY PROTEIN: uncharacterized protein LOC5576344 [Aedes aegypti]
AAEL005177-RD	Up in N7	XM_021839662.1	XP_021695354	adenylate cyclase type 2 isoform X1 [Aedes aegypti]
AAEL003356-RA	Up in N7	XM_001656642.2	XP_001656692	uncharacterized protein LOC5577900 [Aedes aegypti] >gb|EAT45374.1| AAEL003356-PA [Aedes aegypti]
AAEL009420-RA	Up in N7	XM_001659993.3	XP_001660043	protein peste [Aedes aegypti] >gb|EAT38707.1| AAEL009420-PA [Aedes aegypti]
AAEL022373-RB	Up in N7	XM_021854526.1	XP_021710218	moesin/ezrin/radixin homolog 2 isoform X2 [Aedes aegypti]
AAEL002838-RA	Up in N7	XM_001655957.2	XP_001656007	uncharacterized protein LOC5576229 [Aedes aegypti]
AAEL019898-RE	Up in N7	XM_021849629.1	XP_021705318	uncharacterized protein LOC5565208 isoform X3 [Aedes aegypti]
AAEL001844-RA	Up in N7	XM_001654079.2	XP_001654129	carboxypeptidase B [Aedes aegypti]
AAEL007800-RE	Up in N7	XM_001653931.2	XP_001653981	upstream-binding protein 1 isoform X2 [Aedes aegypti]
AAEL023098-RC	Up in N7	XM_021849914.1	XP_021705605	eukaryotic translation initiation factor 4 gamma 2 [Aedes aegypti] >ref|XP_021705606.1| eukaryotic translation initiation factor 4 gamma 2 [Aedes aegypti] >ref|XP_021705607.1| eukaryotic translation initiation factor 4 gamma 2 [Aedes aegypti] >ref|XP_021705608.1| eukaryotic translation initiation factor 4 gamma 2 [Aedes aegypti]
AAEL027066-RA	Up in N7	XM_021850791.1	XP_021706483	phospholipase D1 [Aedes aegypti]
AAEL006982-RG	Up in N7	XM_021847083.1	XP_001652443	phospholipase A1 member A isoform X2 [Aedes aegypti] >ref|XP_021702770.1| phospholipase A1 member A isoform X2 [Aedes aegypti] >ref|XP_021702771.1| phospholipase A1 member A isoform X2 [Aedes aegypti] >ref|XP_021702772.1| phospholipase A1 member A isoform X2 [Aedes aegypti] >ref|XP_021702773.1| phospholipase A1 member A isoform X2 [Aedes aegypti] >ref|XP_021702775.1| phospholipase A1 member A iso…
AAEL019814-RD	Up in N7	XM_021850619.1	XP_021706309	centrosomin isoform X2 [Aedes aegypti] >ref|XP_021706310.1| centrosomin isoform X2 [Aedes aegypti] >ref|XP_021706311.1| centrosomin isoform X2 [Aedes aegypti] >ref|XP_021706312.1| centrosomin isoform X2 [Aedes aegypti] >ref|XP_021706313.1| centrosomin isoform X2 [Aedes aegypti]
AAEL000994-RG	Up in N7	XM_021839896.1	XP_021695583	uncharacterized protein LOC5567847 isoform X1 [Aedes aegypti]
AAEL011441-RC	Up in N7	XM_021844149.1	XP_001661659	calcium/calmodulin-dependent protein kinase type 1 [Aedes aegypti] >ref|XP_021699840.1| calcium/calmodulin-dependent protein kinase type 1 [Aedes aegypti] >ref|XP_021699841.1| calcium/calmodulin-dependent protein kinase type 1 [Aedes aegypti]
AAEL003529-RB	Up in N7	XM_021844830.1	XP_021700522	zinc finger and BTB domain-containing protein 17 [Aedes aegypti] >ref|XP_021700523.1| zinc finger and BTB domain-containing protein 17 [Aedes aegypti]
AAEL021559-RA	Up in N7	XR_002500475.1	EAT38714	AAEL009425-PA [Aedes aegypti]
AAEL007539-RD	Up in N7	XM_021852200.1	XP_021707892	transcription intermediary factor 1-alpha isoform X1 [Aedes aegypti]
AAEL009387-RF	Up in N7	XM_021851194.1	XP_021706886	hexokinase type 2 isoform X6 [Aedes aegypti]
AAEL024696-RE	Up in N7	XM_021850943.1	XP_011493585	sorbitol dehydrogenase [Aedes aegypti] >ref|XP_021706635.1| sorbitol dehydrogenase [Aedes aegypti] >ref|XP_021706636.1| sorbitol dehydrogenase [Aedes aegypti] >ref|XP_021706637.1| sorbitol dehydrogenase [Aedes aegypti] >ref|XP_021706638.1| sorbitol dehydrogenase [Aedes aegypti] >ref|XP_021712085.1| sorbitol dehydrogenase-like [Aedes aegypti] >ref|XP_021712086.1| sorbitol dehydrogenase-like [Aedes…
AAEL011112-RE	Up in N7	XM_021850943.1	XP_011493585	sorbitol dehydrogenase [Aedes aegypti] >ref|XP_021706635.1| sorbitol dehydrogenase [Aedes aegypti] >ref|XP_021706636.1| sorbitol dehydrogenase [Aedes aegypti] >ref|XP_021706637.1| sorbitol dehydrogenase [Aedes aegypti] >ref|XP_021706638.1| sorbitol dehydrogenase [Aedes aegypti] >ref|XP_021712085.1| sorbitol dehydrogenase-like [Aedes aegypti] >ref|XP_021712086.1| sorbitol dehydrogenase-like [Aedes…
AAEL024696-RF	Up in N7	XM_021856398.1	XP_011493585	sorbitol dehydrogenase [Aedes aegypti] >ref|XP_021706635.1| sorbitol dehydrogenase [Aedes aegypti] >ref|XP_021706636.1| sorbitol dehydrogenase [Aedes aegypti] >ref|XP_021706637.1| sorbitol dehydrogenase [Aedes aegypti] >ref|XP_021706638.1| sorbitol dehydrogenase [Aedes aegypti] >ref|XP_021712085.1| sorbitol dehydrogenase-like [Aedes aegypti] >ref|XP_021712086.1| sorbitol dehydrogenase-like [Aedes…
AAEL013722-RA	Up in N7	XM_001663860.2	XP_001663910	partner of bursicon [Aedes aegypti] >gb|EAT34015.1| AAEL013722-PA [Aedes aegypti]
AAEL009265-RC	Up in N7	XM_021845042.1	XP_021700734	uncharacterized protein LOC5571731 isoform X1 [Aedes aegypti] >ref|XP_021700735.1| uncharacterized protein LOC5571731 isoform X1 [Aedes aegypti]
AAEL022750-RH	Up in N7	XM_021843307.1	XP_021698994	LIM and SH3 domain protein Lasp isoform X1 [Aedes aegypti] >ref|XP_021698995.1| LIM and SH3 domain protein Lasp isoform X1 [Aedes aegypti] >ref|XP_021698996.1| LIM and SH3 domain protein Lasp isoform X1 [Aedes aegypti] >ref|XP_021698997.1| LIM and SH3 domain protein Lasp isoform X1 [Aedes aegypti] >ref|XP_021698998.1| LIM and SH3 domain protein Lasp isoform X1 [Aedes aegypti] >ref|XP_021698999.1|…
AAEL000600-RA	Up in N7	XM_001649141.2	XP_001649191	protein Wnt-10a [Aedes aegypti] >ref|XP_021703001.1| protein Wnt-10a [Aedes aegypti] >ref|XP_021703003.1| protein Wnt-10a [Aedes aegypti]
AAEL026747-RC	Up in N7	XM_021852142.1	XP_021707823	beta-1,3-galactosyltransferase 5 isoform X1 [Aedes aegypti]
AAEL003550-RB	Up in N7	XM_021844836.1	XP_021700528	aquaporin AQPcic isoform X1 [Aedes aegypti]
AAEL008232-RA	Up in N7	XM_001659014.2	XP_001659064	facilitated trehalose transporter Tret1-2 homolog isoform X1 [Aedes aegypti] >gb|EAT44903.1| AAEL003808-PA [Aedes aegypti]
AAEL006609-RB	Up in N7	XM_021848197.1	XP_021703889	Krueppel-like factor 3 [Aedes aegypti]
AAEL007120-RD	Up in N7	XM_021847278.1	XP_021702970	LIM/homeobox protein Lhx3 isoform X3 [Aedes aegypti]
AAEL027072-RB	Up in N7	XR_002502689.1	KXJ82696	hypothetical protein RP20_CCG011817 [Aedes albopictus]
AAEL001503-RE	Up in N7	XM_021844926.1	XP_021700618	sodium/hydrogen exchanger 3 isoform X10 [Aedes aegypti]
AAEL008953-RG	Up in N7	XM_021840890.1	XP_021696560	transcription factor kayak isoform X2 [Aedes aegypti]
AAEL009574-RA	Up in Y7	XM_001660189.2	XP_001660239	elongation of very long chain fatty acids protein AAEL008004 isoform X2 [Aedes aegypti]
AAEL000566-RA	Up in Y7	XM_021852255.1	XP_021707947	uncharacterized protein LOC5564310 [Aedes aegypti]
AAEL009762-RB	Up in Y7	XM_021838794.1	XP_021694486	cytochrome P450 307a1 [Aedes aegypti]
AAEL013684-RC	Up in Y7	XM_021838338.1	XP_021694030	uncharacterized protein LOC5578392 isoform X2 [Aedes aegypti]
AAEL001690-RA	Up in Y7	XM_001659911.2	XP_001659961	chymotrypsin-2 [Aedes aegypti] >gb|EAT47186.1| AAEL001690-PA [Aedes aegypti]
AAEL019470-RA	Up in Y7	XM_001660777.2	XP_001660827	protein G12 [Aedes aegypti] >gb|EAT37594.1| AAEL010429-PA [Aedes aegypti]
AAEL001696-RC	Up in Y7	XM_021841461.1	XP_021697153	retinal homeobox protein Rax isoform X2 [Aedes aegypti]
AAEL013127-RC	Up in Y7	XM_021857166.1	XP_021701764	protein G12 isoform X2 [Aedes aegypti] >ref|XP_021712858.1| protein G12 isoform X2 [Aedes aegypti]
AAEL010435-RB	Up in Y7	XM_021846068.1	XP_021701760	protein G12 [Aedes aegypti]
AAEL007432-RA	Up in Y7	XM_001658309.2	XP_001658359	brachyurin [Aedes aegypti] >gb|ACV07660.1| serine protease I [Aedes aegypti]
AAEL001656-RA	Up in Y7	XM_001653714.2	XP_001653764	putative inorganic phosphate cotransporter isoform X2 [Aedes aegypti] >gb|EAT47235.1| AAEL001656-PA [Aedes aegypti]
AAEL015136-RA	Up in Y7	XM_001647755.2	XP_001647805	protein NPC2 homolog [Aedes aegypti]
AAEL001887-RD	Up in Y7	XM_001654135.2	XP_001654185	glutamine synthetase 1, mitochondrial [Aedes aegypti] >ref|XP_001654186.1| glutamine synthetase 1, mitochondrial [Aedes aegypti] >gb|EAT46939.1| AAEL001887-PA [Aedes aegypti] >gb|EAT46940.1| AAEL001887-PB [Aedes aegypti]
AAEL002467-RA	Up in Y7	XM_001655315.2	AAL05409	peritrophin [Aedes aegypti]
AAEL009479-RB	Up in Y7	XM_021843405.1	XP_021699097	proton-coupled amino acid transporter-like protein CG1139 [Aedes aegypti]
AAEL013127-RB	Up in Y7	XM_001659734.2	XP_001656378	protein G12 isoform X1 [Aedes aegypti] >ref|XP_001659784.2| protein G12 isoform X1 [Aedes aegypti] >gb|EAT34669.1| AAEL013127-PB [Aedes aegypti]
AAEL009165-RA	Up in Y7	XM_001656327.2	XP_021701763	protein G12 isoform X1 [Aedes aegypti] >gb|EAT38997.1| AAEL009165-PA [Aedes aegypti]
AAEL019469-RA	Up in Y7	XM_021846069.1	XP_001663776	protein G12 [Aedes aegypti] >ref|XP_021701761.1| protein G12 [Aedes aegypti] >ref|XP_021701762.1| protein G12-like [Aedes aegypti] >ref|XP_021712126.1| protein G12-like [Aedes aegypti] >gb|AAL05408.1| microvilli membrane protein [Aedes aegypti] >gb|EAT34153.1| AAEL013577-PC [Aedes aegypti] >gb|EAT34155.1| AAEL013577-PB [Aedes aegypti] >gb|EAT37592.1| AAEL010431-PA [Aedes aegypti]
AAEL008769-RA	Up in Y7	XM_001659442.2	XP_001659492	serine protease SP24D [Aedes aegypti]
AAEL006381-RA	Up in Y7	XM_001651908.2	XP_001651958	sphingomyelin phosphodiesterase [Aedes aegypti]
AAEL001693-RA	Up in Y7	XM_001659920.2	XP_001659970	serine protease SP24D [Aedes aegypti]
AAEL014752-RB	Up in Y7	XM_021839421.1	XP_001649534	negative elongation factor B [Aedes aegypti] >ref|XP_021695113.1| negative elongation factor B [Aedes aegypti] >ref|XP_021712935.1| negative elongation factor B [Aedes aegypti] >ref|XP_021712936.1| negative elongation factor B [Aedes aegypti] >gb|EAT32993.1| AAEL014752-PA [Aedes aegypti]
AAEL019700-RH	Up in Y7	XM_021857627.1	XP_021713312	protein phosphatase PP2A 55 kDa regulatory subunit isoform X1 [Aedes aegypti] >ref|XP_021713313.1| protein phosphatase PP2A 55 kDa regulatory subunit isoform X1 [Aedes aegypti]
AAEL013118-RB	Up in Y7	XM_001656325.2	XP_001656375	protein G12 [Aedes aegypti] >gb|EAT34666.1| AAEL013118-PB [Aedes aegypti]
AAEL004870-RA	Up in Y7	XM_001649920.3	XP_001649970	cytochrome P450 18a1 [Aedes aegypti] >gb|EAT43716.1| AAEL004870-PA [Aedes aegypti]
AAEL019471-RA	Up in Y7	XM_021846069.1	XP_001663776	protein G12 [Aedes aegypti] >ref|XP_021701761.1| protein G12 [Aedes aegypti] >ref|XP_021701762.1| protein G12-like [Aedes aegypti] >ref|XP_021712126.1| protein G12-like [Aedes aegypti] >gb|AAL05408.1| microvilli membrane protein [Aedes aegypti] >gb|EAT34153.1| AAEL013577-PC [Aedes aegypti] >gb|EAT34155.1| AAEL013577-PB [Aedes aegypti] >gb|EAT37592.1| AAEL010431-PA [Aedes aegypti]
AAEL001887-RC	Up in Y7	XM_001654136.2	XP_001654185	glutamine synthetase 1, mitochondrial [Aedes aegypti] >ref|XP_001654186.1| glutamine synthetase 1, mitochondrial [Aedes aegypti] >gb|EAT46939.1| AAEL001887-PA [Aedes aegypti] >gb|EAT46940.1| AAEL001887-PB [Aedes aegypti]
AAEL004132-RE	Up in Y7	XM_011494923.2	XP_011493225	mediator of RNA polymerase II transcription subunit 31 isoform X2 [Aedes aegypti]
AAEL020849-RA	Up in Y7	XM_021842634.1	XP_021698326	GATA zinc finger domain-containing protein 10 [Aedes aegypti]
AAEL012618-RA	Up in Y7	XM_001662693.2	XP_001662743	RNA-binding protein 34 [Aedes aegypti]
AAEL000271-RD	Up in Y7	XM_001654754.2	XP_001654804	gamma-glutamyl hydrolase isoform X3 [Aedes aegypti]
AAEL011522-RB	Up in Y7	XM_021837326.1	XP_001661722	ras-related and estrogen-regulated growth inhibitor-like protein [Aedes aegypti] >ref|XP_021693018.1| ras-related and estrogen-regulated growth inhibitor-like protein [Aedes aegypti] >ref|XP_021693019.1| ras-related and estrogen-regulated growth inhibitor-like protein [Aedes aegypti] >ref|XP_021693020.1| ras-related and estrogen-regulated growth inhibitor-like protein [Aedes aegypti] >ref|XP_0216…
AAEL013061-RA	Up in Y7	XM_001663220.2	XP_001663270	U6 snRNA-associated Sm-like protein LSm7 [Aedes aegypti] >ref|XP_021701716.1| U6 snRNA-associated Sm-like protein LSm7 [Aedes aegypti] >ref|XP_021701717.1| U6 snRNA-associated Sm-like protein LSm7 [Aedes aegypti]
AAEL000770-RC	Up in Y7	XR_002502518.1	XP_021709871	lissencephaly-1 homolog [Aedes aegypti] >ref|XP_021709872.1| lissencephaly-1 homolog [Aedes aegypti]
AAEL008471-RA	Up in Y7	XM_001659225.2	XP_001659275	uncharacterized protein LOC5579397 isoform X1 [Aedes aegypti] >ref|XP_021695789.1| uncharacterized protein LOC5579397 isoform X1 [Aedes aegypti] >ref|XP_021695790.1| uncharacterized protein LOC5579397 isoform X1 [Aedes aegypti] >ref|XP_021695791.1| uncharacterized protein LOC5579397 isoform X1 [Aedes aegypti] >ref|XP_021695792.1| uncharacterized protein LOC5579397 isoform X1 [Aedes aegypti] >gb|E…
AAEL000485-RC	Up in Y7	XM_021852547.1	XP_021708239	mitochondrial proton/calcium exchanger protein isoform X2 [Aedes aegypti]
AAEL003352-RA	Up in Y7	XM_001656630.2	XP_001656680	NHP2-like protein 1 homolog [Aedes aegypti] >ref|XP_001847839.1| NHP2-like protein 1 homolog [Culex quinquefasciatus] >ref|XP_019561486.1| NHP2-like protein 1 homolog [Aedes albopictus] >ref|XP_039443919.1| NHP2-like protein 1 homolog [Culex pipiens pallens] >gb|ABF18367.1| 60S ribosomal protein 15.5kD/SNU13 [Aedes aegypti] >gb|EAT45362.1| AAEL003352-PA [Aedes aegypti] >gb|EDS27034.1| 13 kDa ribo…
AAEL007658-RM	Up in Y7	XM_021838995.1	XP_021694681	partitioning defective 3 homolog isoform X4 [Aedes aegypti] >ref|XP_021694682.1| partitioning defective 3 homolog isoform X4 [Aedes aegypti] >ref|XP_021694683.1| partitioning defective 3 homolog isoform X4 [Aedes aegypti] >ref|XP_021694684.1| partitioning defective 3 homolog isoform X4 [Aedes aegypti] >ref|XP_021694685.1| partitioning defective 3 homolog isoform X4 [Aedes aegypti] >ref|XP_0216946…
AAEL010077-RA	Up in Y7	XM_001660563.2	XP_001660613	GPN-loop GTPase 1 [Aedes aegypti] >gb|EAT37997.1| AAEL010077-PA [Aedes aegypti]
AAEL019956-RF	Up in Y7	XM_021840410.1	XP_021696102	cAMP-dependent protein kinase type I regulatory subunit isoform X2 [Aedes aegypti]
AAEL013075-RB	Up in Y7	XM_021839320.1	XP_019552375	LOW QUALITY PROTEIN: 46 kDa FK506-binding nuclear protein-like [Aedes albopictus]
AAEL015199-RB	Up in Y7	XM_001650869.2	XP_001650919	pre-mRNA-processing factor 19 [Aedes aegypti] >gb|EAT32620.1| AAEL015199-PA [Aedes aegypti] >gb|EAT36374.1| AAEL011535-PA [Aedes aegypti]
AAEL025687-RA	Up in Y7	XM_021845507.1	XP_021701199	uncharacterized protein LOC110676681 [Aedes aegypti]
AAEL017462-RB	Up in Y7	XM_011495126.2	XP_011493428	hippocampus abundant transcript 1 protein isoform X2 [Aedes aegypti]
AAEL011782-RA	Up in Y7	XM_001661856.2	XP_001661906	GPN-loop GTPase 2 [Aedes aegypti] >gb|EAT36115.1| AAEL011782-PA [Aedes aegypti]
AAEL019795-RA	Up in Y7	XM_021851398.1	XP_021707090	RNA-binding protein fusilli isoform X1 [Aedes aegypti] >ref|XP_021707091.1| RNA-binding protein fusilli isoform X1 [Aedes aegypti]
AAEL013078-RF	Up in Y7	XM_021839330.1	XP_021695017	probable Dol-P-Man:Man(7)GlcNAc(2)-PP-Dol alpha-1,6-mannosyltransferase [Aedes aegypti] >ref|XP_021695018.1| probable Dol-P-Man:Man(7)GlcNAc(2)-PP-Dol alpha-1,6-mannosyltransferase [Aedes aegypti] >ref|XP_021695019.1| probable Dol-P-Man:Man(7)GlcNAc(2)-PP-Dol alpha-1,6-mannosyltransferase [Aedes aegypti] >ref|XP_021695020.1| probable Dol-P-Man:Man(7)GlcNAc(2)-PP-Dol alpha-1,6-mannosyltransferase …
AAEL006637-RA	Up in Y7	XM_001657869.2	XP_001657919	ribosomal RNA-processing protein 8 [Aedes aegypti]
AAEL009914-RA	Up in Y7	XM_001654040.2	XP_026318178	probable small nuclear ribonucleoprotein Sm D2 [Hyposmocoma kahamanoa]
AAEL007496-RA	Up in Y7	XM_001652743.2	XP_001652793	DNA-directed RNA polymerase III subunit RPC3 [Aedes aegypti] >ref|XP_021713261.1| DNA-directed RNA polymerase III subunit RPC3-like [Aedes aegypti] >gb|EAT40806.1| AAEL007496-PA [Aedes aegypti]
AAEL027972-RA	Up in Y7	XM_021838676.1	XP_021694368	uncharacterized protein LOC110674467 [Aedes aegypti]
AAEL022240-RD	Up in Y7	XM_021853493.1	XP_021709183	UPF0518 protein AAEL005291 isoform X1 [Aedes aegypti] >ref|XP_021709184.1| UPF0518 protein AAEL005291 isoform X1 [Aedes aegypti] >ref|XP_021709185.1| UPF0518 protein AAEL005291 isoform X1 [Aedes aegypti]
AAEL000994-RF	Up in Y7	XM_021839895.1	XP_021695583	uncharacterized protein LOC5567847 isoform X1 [Aedes aegypti]
AAEL011171-RA	Up in Y7	XM_001661418.2	XP_001661468	ras-related protein Rab5 [Aedes aegypti] >gb|EAT36769.1| AAEL011171-PA [Aedes aegypti]
AAEL019870-RA	Up in Y7	XM_021839952.1	XP_021695644	uncharacterized protein LOC5578209 [Aedes aegypti]
AAEL009086-RA	Up in Y7	XM_001659647.2	XP_001659697	uncharacterized protein LOC5571446 [Aedes aegypti]
AAEL002415-RG	Up in Y7	XM_021853835.1	XP_021709512	LIM and senescent cell antigen-like-containing domain protein 1 isoform X1 [Aedes aegypti]
AAEL011158-RB	Up in Y7	XM_011495285.2	XP_011493587	apoptosis-inducing factor 3 isoform X2 [Aedes aegypti]
AAEL013992-RE	Up in Y7	XM_021841744.1	XP_001657257	protein Asterix [Aedes aegypti] >ref|XP_021697435.1| protein Asterix [Aedes aegypti] >ref|XP_021697436.1| protein Asterix [Aedes aegypti]
AAEL019529-RI	Up in Y7	XM_021839928.1	XP_021695618	splicing factor 3B subunit 3 isoform X1 [Aedes aegypti] >ref|XP_021695619.1| splicing factor 3B subunit 3 isoform X1 [Aedes aegypti] >ref|XP_021695620.1| splicing factor 3B subunit 3 isoform X1 [Aedes aegypti] >ref|XP_021695621.1| splicing factor 3B subunit 3 isoform X1 [Aedes aegypti] >ref|XP_021695622.1| splicing factor 3B subunit 3 isoform X1 [Aedes aegypti] >ref|XP_021695623.1| splicing facto…
AAEL011251-RA	Up in Y7	XM_001661483.2	XP_001661533	pre-mRNA-splicing factor RBM22 [Aedes aegypti] >gb|EAT36686.1| AAEL011251-PA [Aedes aegypti]
AAEL012071-RC	Up in Y7	XM_021852505.1	XP_001662234	GTPase HRas [Aedes aegypti] >ref|XP_019534752.1| GTPase HRas [Aedes albopictus] >ref|XP_021708196.1| GTPase HRas [Aedes aegypti] >ref|XP_021708197.1| GTPase HRas [Aedes aegypti] >ref|XP_021708198.1| GTPase HRas [Aedes aegypti] >ref|XP_021708199.1| GTPase HRas [Aedes aegypti] >ref|XP_021708200.1| GTPase HRas [Aedes aegypti] >ref|XP_021708201.1| GTPase HRas [Aedes aegypti] >ref|XP_029718436.1| GTPa…
AAEL013045-RB	Up in Y7	XM_001663213.2	XP_001663263	exosome complex component RRP41 [Aedes aegypti] >gb|EAT34742.1| AAEL013045-PA [Aedes aegypti] >gb|EAT34991.1| AAEL012812-PA [Aedes aegypti]
AAEL025216-RC	Up in Y7	XM_021847721.1	XP_021703407	signal-induced proliferation-associated 1-like protein 2 isoform X1 [Aedes aegypti] >ref|XP_021703408.1| signal-induced proliferation-associated 1-like protein 2 isoform X1 [Aedes aegypti] >ref|XP_021703409.1| signal-induced proliferation-associated 1-like protein 2 isoform X1 [Aedes aegypti] >ref|XP_021703411.1| signal-induced proliferation-associated 1-like protein 2 isoform X1 [Aedes aegypti]
AAEL001775-RA	Up in Y7	XM_001653904.2	XP_001653954	WASH complex subunit 3 [Aedes aegypti] >gb|EAT47081.1| AAEL001775-PA [Aedes aegypti]
AAEL025812-RA	Up in Y7	XR_002501246.1	XP_021695164	uncharacterized protein LOC110674881 [Aedes aegypti] >ref|XP_021705067.1| uncharacterized protein LOC110677819 [Aedes aegypti]
AAEL011081-RA	Up in Y7	XM_001661346.2	XP_001661397	HD domain-containing protein 2 isoform X1 [Aedes aegypti] >gb|EAT36867.1| AAEL011081-PB [Aedes aegypti]
AAEL012260-RA	Up in Y7	XM_021840274.1	XP_021695966	U3 small nucleolar RNA-interacting protein 2 [Aedes aegypti]
AAEL008635-RB	Up in Y7	XM_001653314.2	XP_001653364	ATP-binding cassette sub-family G member 4 [Aedes aegypti]
AAEL006135-RA	Up in Y7	XM_001657471.2	XP_001657521	nuclear cap-binding protein subunit 2 [Aedes aegypti] >sp|Q177H0.1| RecName: Full=Nuclear cap-binding protein subunit 2; AltName: Full=20 kDa nuclear cap-binding protein; AltName: Full=NCBP 20 kDa subunit; Short=CBP20 [Aedes aegypti] >gb|EAT42307.1| AAEL006135-PA [Aedes aegypti]
AAEL025229-RA	Up in Y7	XM_021847746.1	XP_021703438	apolipoprotein D [Aedes aegypti]
AAEL018323-RD	Up in Y7	XM_021851648.1	XP_021707339	ribosome-binding protein 1 isoform X1 [Aedes aegypti] >ref|XP_021707340.1| ribosome-binding protein 1 isoform X1 [Aedes aegypti]
AAEL020432-RA	Up in Y7	XM_021843311.1	XP_021699003	probable deoxyhypusine synthase [Aedes aegypti]
AAEL004987-RD	Up in Y7	XM_021845185.1	XP_021700875	putative beta-carotene-binding protein isoform X2 [Aedes aegypti]
AAEL010311-RB	Up in Y7	XM_021848646.1	XP_021704338	tudor domain-containing protein 7A isoform X2 [Aedes aegypti]
AAEL003944-RA	Up in Y7	XM_001648010.2	XP_001648060	nucleolar protein 16 [Aedes aegypti] >gb|EAT44729.1| AAEL003944-PA [Aedes aegypti]
AAEL012187-RC	Up in Y7	XM_021843467.1	XP_001662296	uncharacterized protein LOC5575936 isoform X1 [Aedes aegypti] >ref|XP_021699157.1| uncharacterized protein LOC5575936 isoform X1 [Aedes aegypti]
AAEL011302-RJ	Up in Y7	XM_021853207.1	XP_001655242	annexin B9 isoform X6 [Aedes aegypti] >ref|XP_021708899.1| annexin B9 isoform X6 [Aedes aegypti] >gb|EAT36626.1| AAEL011302-PB [Aedes aegypti]
AAEL022136-RG	Up in Y7	XM_021843539.1	XP_021699228	uncharacterized protein LOC5577147 isoform X1 [Aedes aegypti] >ref|XP_021699229.1| uncharacterized protein LOC5577147 isoform X1 [Aedes aegypti] >ref|XP_021699230.1| uncharacterized protein LOC5577147 isoform X1 [Aedes aegypti] >ref|XP_021699231.1| uncharacterized protein LOC5577147 isoform X1 [Aedes aegypti] >ref|XP_021699232.1| uncharacterized protein LOC5577147 isoform X1 [Aedes aegypti] >ref|…
AAEL007114-RA	Up in Y7	XM_001652497.2	XP_001652547	protein pinocchio isoform X2 [Aedes aegypti] >gb|EAT41216.1| AAEL007114-PA [Aedes aegypti]
AAEL015070-RA	Up in Y7	XM_001650419.2	XP_001650469	membrane-bound alkaline phosphatase [Aedes aegypti]
AAEL013103-RA	Up in Y7	XM_001663253.2	XP_001663303	exosome complex component RRP40 [Aedes aegypti]
AAEL012624-RB	Up in Y7	XM_021837943.1	XP_021693635	elongator complex protein 6 isoform X1 [Aedes aegypti]
AAEL025816-RA	Up in Y7	XR_002498933.1	not available	not available
AAEL021846-RA	Up in Y7	XM_021846561.1	XP_021702253	CD63 antigen [Aedes aegypti]
AAEL012839-RA	Up in Y7	XM_001662907.2	XP_001662957	uncharacterized protein LOC5576860 isoform X1 [Aedes aegypti]
AAEL015298-RD	Up in Y7	XM_021843233.1	XP_021698925	protein ABHD1 [Aedes aegypti] >ref|XP_021698926.1| protein ABHD1 [Aedes aegypti] >ref|XP_021698927.1| protein ABHD1 [Aedes aegypti] >ref|XP_021698928.1| protein ABHD1 [Aedes aegypti] >ref|XP_021698929.1| protein ABHD1 [Aedes aegypti] >gb|EAT32449.1| AAEL015298-PA [Aedes aegypti] >gb|EAT37296.1| AAEL010695-PA [Aedes aegypti]
AAEL004918-RB	Up in Y7	XM_021844888.1	XP_001650044	brain tumor protein [Aedes aegypti] >ref|XP_021700580.1| brain tumor protein [Aedes aegypti] >ref|XP_021700581.1| brain tumor protein [Aedes aegypti] >ref|XP_021700582.1| brain tumor protein [Aedes aegypti] >ref|XP_021700583.1| brain tumor protein [Aedes aegypti] >ref|XP_021700584.1| brain tumor protein [Aedes aegypti] >ref|XP_021700585.1| brain tumor protein [Aedes aegypti] >gb|EAT43650.1| AAEL0…
AAEL003534-RG	Up in Y7	XM_021844825.1	XP_021700513	uncharacterized protein DDB_G0283357 isoform X1 [Aedes aegypti]
AAEL001089-RA	Up in Y7	XM_001657945.2	XP_021710716	mitochondrial intermembrane space import and assembly protein 40 [Aedes aegypti] >gb|EAT47825.1| AAEL001085-PA [Aedes aegypti]
AAEL000213-RA	Up in Y7	XM_001658835.2	XP_001658885	D-amino-acid oxidase [Aedes aegypti]
AAEL019620-RA	Up in Y7	XM_021840230.1	EAT35699	AAEL012155-PA [Aedes aegypti]
AAEL002377-RA	Up in Y7	XM_001655106.2	XP_001655156	small nuclear ribonucleoprotein-associated protein B [Aedes aegypti] >gb|ABF18538.1| U1 snRNP component [Aedes aegypti] >gb|EAT46445.1| AAEL002377-PA [Aedes aegypti]
AAEL011233-RA	Up in Y7	XM_001661454.2	XP_001661504	probable small nuclear ribonucleoprotein E [Aedes aegypti] >gb|EAT36707.1| AAEL011233-PA [Aedes aegypti]
AAEL005851-RA	Up in Y7	XM_001651460.2	XP_001651510	exosome complex exonuclease RRP42 [Aedes aegypti]
AAEL011803-RB	Up in Y7	XM_021854489.1	XP_021710181	band 7 protein AGAP004871 isoform X1 [Aedes aegypti]
AAEL008894-RC	Up in Y7	XM_021853039.1	XP_021708731	uncharacterized protein LOC5571211 [Aedes aegypti] >ref|XP_021708732.1| uncharacterized protein LOC5571211 [Aedes aegypti] >ref|XP_021708733.1| uncharacterized protein LOC5571211 [Aedes aegypti] >ref|XP_021708734.1| uncharacterized protein LOC5571211 [Aedes aegypti]
AAEL025704-RA	Up in Y7	XM_021853271.1	XP_021708963	ribosomal RNA processing protein 36 homolog [Aedes aegypti]
AAEL010440-RA	Up in Y7	XM_001660773.2	XP_001660823	nucleolin [Aedes aegypti] >ref|XP_021709526.1| nucleolin [Aedes aegypti] >ref|XP_021709528.1| nucleolin [Aedes aegypti] >gb|EAT37590.1| AAEL010440-PA [Aedes aegypti]
AAEL006819-RA	Up in Y7	XM_001658006.2	XP_001658056	exosome complex component RRP46 [Aedes aegypti] >gb|EAT41543.1| AAEL006819-PA [Aedes aegypti]
AAEL003141-RA	Up in Y7	XM_001656295.2	XP_001656345	uncharacterized protein LOC5577239 [Aedes aegypti]
AAEL020737-RA	Up in Y7	XM_021848057.1	XP_001647949	40S ribosomal protein S21 [Aedes aegypti] >ref|XP_001649272.1| 40S ribosomal protein S21 [Aedes aegypti] >ref|XP_021703749.1| LOW QUALITY PROTEIN: 40S ribosomal protein S21-like [Aedes aegypti] >gb|ABF18302.1| 40S ribosomal protein S21 [Aedes aegypti] >gb|EAT44098.1| AAEL004503-PA [Aedes aegypti] >gb|EAT48397.1| AAEL000529-PA [Aedes aegypti] >gb|EJY57537.1| AAEL004503-PB [Aedes aegypti]
AAEL024179-RA	Up in Y7	XM_021839345.1	XP_021695035	mitochondrial coenzyme A transporter SLC25A42 [Aedes aegypti] >ref|XP_021695037.1| mitochondrial coenzyme A transporter SLC25A42 [Aedes aegypti] >ref|XP_021695038.1| mitochondrial coenzyme A transporter SLC25A42 [Aedes aegypti]
AAEL017367-RB	Up in Y7	XM_021850613.1	XP_021706305	glutamic acid-rich protein [Aedes aegypti]
AAEL004936-RD	Up in Y7	XM_021844900.1	XP_001650055	protein bicaudal D [Aedes aegypti] >ref|XP_021700590.1| protein bicaudal D [Aedes aegypti] >ref|XP_021700591.1| protein bicaudal D [Aedes aegypti] >ref|XP_021700592.1| protein bicaudal D [Aedes aegypti] >ref|XP_021700593.1| protein bicaudal D [Aedes aegypti] >ref|XP_021700594.1| protein bicaudal D [Aedes aegypti]
AAEL010245-RJ	Up in Y7	XM_001654336.2	EJY57855	AAEL010245-PC [Aedes aegypti]
AAEL006001-RE	Up in Y7	XM_001651713.2	XP_001651763	coiled-coil domain-containing protein 28A isoform X1 [Aedes aegypti] >gb|EAT42459.1| AAEL006001-PA [Aedes aegypti] >gb|EAT42460.1| AAEL006001-PB [Aedes aegypti]
AAEL011964-RA	Up in Y7	XM_001655726.2	XP_001655776	zinc finger protein 70 [Aedes aegypti] >ref|XP_021706179.1| zinc finger protein 70 [Aedes aegypti] >ref|XP_021706180.1| zinc finger protein 70 [Aedes aegypti] >gb|EAT35910.1| AAEL011964-PA [Aedes aegypti]
AAEL025226-RB	Up in Y7	XM_021841184.1	XP_021696874	LON peptidase N-terminal domain and RING finger protein 2 [Aedes aegypti] >ref|XP_021696875.1| LON peptidase N-terminal domain and RING finger protein 2 [Aedes aegypti] >ref|XP_021696876.1| LON peptidase N-terminal domain and RING finger protein 2 [Aedes aegypti]
AAEL005972-RB	Up in Y7	XM_001664276.2	XP_001664326	uncharacterized protein LOC5579864 [Aedes aegypti]
AAEL002556-RB	Up in Y7	XM_021857715.1	XP_021713407	WD repeat-containing protein 6 [Aedes aegypti]
AAEL018234-RD	Up in Y7	XM_021842610.1	XP_021698302	uncharacterized protein LOC5563832 isoform X1 [Aedes aegypti]
AAEL006033-RA	Up in Y7	XM_001657336.2	XP_001657386	dihydroorotate dehydrogenase (quinone), mitochondrial [Aedes aegypti] >gb|EAT42442.1| AAEL006033-PA [Aedes aegypti]
AAEL009589-RA	Up in Y7	XM_001660219.2	XP_001660269	endonuclease G, mitochondrial [Aedes aegypti] >gb|EAT38534.1| AAEL009589-PA [Aedes aegypti]
AAEL004161-RA	Up in Y7	XM_001648514.2	XP_001648564	CDGSH iron-sulfur domain-containing protein 3, mitochondrial [Aedes aegypti] >gb|EAT44437.1| AAEL004161-PA [Aedes aegypti]
AAEL024346-RF	Up in Y7	XM_021844255.1	XP_021699947	F-actin-uncapping protein LRRC16A isoform X3 [Aedes aegypti]
AAEL017003-RC	Up in Y7	XM_021838130.1	XP_021693822	serine protease easter isoform X1 [Aedes aegypti]
AAEL021474-RA	Up in Y7	XM_021856599.1	XP_001658462	LOW QUALITY PROTEIN: protein arginine N-methyltransferase 5 [Aedes aegypti] >ref|XP_021712291.1| protein arginine N-methyltransferase 5-like [Aedes aegypti] >gb|EAT40711.1| AAEL007578-PA [Aedes aegypti]
AAEL012704-RC	Up in Y7	XM_021857279.1	XP_021712970	uncharacterized protein LOC5576671 [Aedes aegypti] >ref|XP_021712971.1| uncharacterized protein LOC5576671 [Aedes aegypti]
AAEL014256-RB	Up in Y7	XM_021853745.1	XP_001648316	putative ATP-dependent RNA helicase DHX33 [Aedes aegypti] >ref|XP_021709437.1| putative ATP-dependent RNA helicase DHX33 [Aedes aegypti] >gb|EAT33470.1| AAEL014256-PA [Aedes aegypti]
AAEL002756-RA	Up in Y7	XM_021849996.1	XP_021705688	synaptotagmin-4 isoform X1 [Aedes aegypti]
AAEL025250-RE	Up in Y7	XM_021837555.1	EAT35082	AAEL012727-PA [Aedes aegypti]
AAEL002249-RA	Up in Y7	XM_001661135.2	XP_001661185	uncharacterized protein LOC5574113 [Aedes aegypti] >gb|EAT46584.1| AAEL002249-PA [Aedes aegypti]
AAEL018314-RD	Up in Y7	XM_021850579.1	XP_021706270	uncharacterized protein LOC5577382 isoform X1 [Aedes aegypti] >ref|XP_021706271.1| uncharacterized protein LOC5577382 isoform X1 [Aedes aegypti] >ref|XP_021706272.1| uncharacterized protein LOC5577382 isoform X1 [Aedes aegypti]
AAEL007858-RA	Up in Y7	XM_001658646.2	XP_001658696	ran GTPase-activating protein [Aedes aegypti]
AAEL008542-RH	Up in Y7	XM_021837969.1	XP_021693650	kinesin heavy chain isoform X1 [Aedes aegypti] >ref|XP_021693656.1| kinesin heavy chain isoform X1 [Aedes aegypti] >ref|XP_021693661.1| kinesin heavy chain isoform X1 [Aedes aegypti] >ref|XP_021693670.1| kinesin heavy chain isoform X1 [Aedes aegypti] >ref|XP_021693676.1| kinesin heavy chain isoform X1 [Aedes aegypti]
AAEL004131-RA	Up in Y7	XM_001648453.2	XP_001648503	TBC1 domain family member 10A [Aedes aegypti] >ref|XP_021709490.1| TBC1 domain family member 10A [Aedes aegypti]
AAEL000660-RA	Up in Y7	XM_001649748.2	XP_001649798	peptide methionine sulfoxide reductase [Aedes aegypti] >gb|EAT48309.1| AAEL000660-PA [Aedes aegypti]
AAEL009671-RA	Up in Y7	XM_001653875.2	XP_001653925	U6 snRNA-associated Sm-like protein LSm3 [Aedes aegypti] >gb|EAT38434.1| AAEL009671-PA [Aedes aegypti]
AAEL009957-RC	Up in Y7	XM_021841551.1	XP_021697243	protein Lilipod [Aedes aegypti] >ref|XP_021697244.1| protein Lilipod [Aedes aegypti]
AAEL026676-RB	Up in Y7	XM_021854358.1	XP_021710049	p53 and DNA damage-regulated protein 1 [Aedes aegypti] >ref|XP_021710050.1| p53 and DNA damage-regulated protein 1 [Aedes aegypti]
AAEL019426-RB	Up in Y7	XM_021838390.1	XP_021694078	ETS-like protein pointed isoform X1 [Aedes aegypti]
AAEL011350-RC	Up in Y7	XM_021841540.1	EAT36580	AAEL011350-PA [Aedes aegypti]
AAEL011465-RC	Up in Y7	XM_021842586.1	XP_021698278	major facilitator superfamily domain-containing protein 6-A isoform X1 [Aedes aegypti]
AAEL003238-RA	Up in Y7	XM_001656612.2	XP_001656662	probable palmitoyltransferase ZDHHC16 [Aedes aegypti] >gb|EAT35019.1| AAEL012784-PA [Aedes aegypti]
AAEL010473-RA	Up in Y7	XM_001660814.2	XP_001660864	uncharacterized protein LOC5573375 isoform X1 [Aedes aegypti]
AAEL022067-RA	Up in Y7	XM_021857225.1	XP_001652914	regulator of chromosome condensation [Aedes aegypti] >ref|XP_011493398.1| regulator of chromosome condensation [Aedes aegypti] >ref|XP_021712917.1| regulator of chromosome condensation-like [Aedes aegypti] >ref|XP_021712918.1| regulator of chromosome condensation-like [Aedes aegypti] >gb|EAT40461.1| AAEL007799-PA [Aedes aegypti] >gb|EJY57703.1| AAEL007799-PB [Aedes aegypti]
AAEL020819-RA	Up in Y7	XR_002503217.1	not available	not available
AAEL003654-RB	Up in Y7	XM_021845768.1	XP_021701460	tRNA (adenine(58)-N(1))-methyltransferase non-catalytic subunit TRM6 [Aedes aegypti]
AAEL017161-RA	Up in Y7	XM_011494660.2	XP_013112899	PREDICTED: U6 snRNA-associated Sm-like protein LSm6 [Stomoxys calcitrans]
AAEL004176-RF	Up in Y7	XM_021842654.1	XP_001648566	microtubule-associated protein RP/EB family member 1 isoform X3 [Aedes aegypti] >ref|XP_021698345.1| microtubule-associated protein RP/EB family member 1 isoform X3 [Aedes aegypti] >ref|XP_021698346.1| microtubule-associated protein RP/EB family member 1 isoform X3 [Aedes aegypti] >gb|EAT44439.1| AAEL004176-PB [Aedes aegypti]
AAEL004017-RA	Up in Y7	XM_001648238.2	XP_001648288	DNA polymerase V [Aedes aegypti] >gb|EAT44628.1| AAEL004017-PA [Aedes aegypti]
AAEL010109-RD	Up in Y7	XM_021840507.1	EAT37960	AAEL010109-PA [Aedes aegypti]
AAEL026468-RA	Up in Y7	XM_021838883.1	XP_021694575	uncharacterized protein LOC110674739 [Aedes aegypti]
AAEL009944-RA	Up in Y7	XM_001660439.2	XP_001660489	rRNA-processing protein UTP23 homolog [Aedes aegypti] >gb|EAT38137.1| AAEL009944-PA [Aedes aegypti]
AAEL009356-RA	Up in Y7	XM_001659927.2	XP_001659977	uncharacterized protein C7orf50 homolog [Aedes aegypti]
AAEL026389-RA	Up in Y7	XM_021855241.1	KXJ80047	hypothetical protein RP20_CCG027007 [Aedes albopictus]
AAEL006491-RB	Up in Y7	XM_021850646.1	XP_001652000	GATOR complex protein WDR24 [Aedes aegypti] >ref|XP_021706338.1| GATOR complex protein WDR24 [Aedes aegypti] >gb|EAT41934.1| AAEL006491-PA [Aedes aegypti]
AAEL011756-RA	Up in Y7	XM_001655614.2	XP_001655664	putative aldehyde dehydrogenase family 7 member A1 homolog [Aedes aegypti] >ref|XP_021712728.1| putative aldehyde dehydrogenase family 7 member A1 homolog [Aedes aegypti] >gb|EAT36141.1| AAEL011756-PA [Aedes aegypti]
AAEL011177-RA	Up in Y7	XM_001661421.2	XP_001661471	uncharacterized protein LOC5574456 [Aedes aegypti]
AAEL001838-RA	Up in Y7	XM_001654086.2	XP_001654136	prefoldin subunit 1 [Aedes aegypti] >gb|EAT46990.1| AAEL001838-PA [Aedes aegypti]
AAEL011404-RA	Up in Y7	XM_001661593.2	XP_001661643	C-type lectin domain family 6 member A [Aedes aegypti] >gb|EAT36508.1| AAEL011404-PA [Aedes aegypti]
AAEL000659-RA	Up in Y7	XM_001649718.2	XP_001649768	exosome complex component RRP43 [Aedes aegypti] >gb|EAT48279.1| AAEL000659-PA [Aedes aegypti]
AAEL018273-RC	Up in Y7	XM_021844540.1	XP_021700231	glycerophosphocholine phosphodiesterase GPCPD1 isoform X1 [Aedes aegypti] >ref|XP_021700232.1| glycerophosphocholine phosphodiesterase GPCPD1 isoform X1 [Aedes aegypti] >ref|XP_021700233.1| glycerophosphocholine phosphodiesterase GPCPD1 isoform X1 [Aedes aegypti]
AAEL005339-RB	Up in Y7	XM_021845076.1	XP_001650711	hepatocyte growth factor-regulated tyrosine kinase substrate isoform X1 [Aedes aegypti] >gb|EAT43200.1| AAEL005339-PA [Aedes aegypti]
AAEL012265-RA	Up in Y7	XM_001655925.2	XP_001655975	RNA polymerase I-specific transcription initiation factor RRN3 [Aedes aegypti] >gb|EAT35579.1| AAEL012265-PA [Aedes aegypti]
AAEL002102-RB	Up in Y7	XM_021849253.1	XP_001654729	ero1-like protein [Aedes aegypti] >ref|XP_021704945.1| ero1-like protein [Aedes aegypti]
AAEL020796-RB	Up in Y7	XM_021855648.1	XP_021711340	zinc finger protein Xfin-like isoform X2 [Aedes aegypti]
AAEL020569-RA	Up in Y7	XR_002500633.1	not available	not available
AAEL004818-RC	Up in Y7	XM_021849444.1	XP_021705136	nucleolar complex protein 2 homolog [Aedes aegypti] >ref|XP_021705137.1| nucleolar complex protein 2 homolog [Aedes aegypti]
AAEL005152-RB	Up in Y7	XM_021849966.1	XP_021705654	uncharacterized protein LOC5566048 isoform X1 [Aedes aegypti]
AAEL008292-RG	Up in Y7	XR_002499654.1	ABX57919	diuretic hormone 44 receptor GPRdih1 [Aedes aegypti]
AAEL005915-RJ	Up in Y7	XM_021851840.1	XP_021707529	uncharacterized protein LOC5567273 [Aedes aegypti] >ref|XP_021707530.1| uncharacterized protein LOC5567273 [Aedes aegypti] >ref|XP_021707531.1| uncharacterized protein LOC5567273 [Aedes aegypti] >ref|XP_021707532.1| uncharacterized protein LOC5567273 [Aedes aegypti] >ref|XP_021707533.1| uncharacterized protein LOC5567273 [Aedes aegypti] >ref|XP_021707534.1| uncharacterized protein LOC5567273 [Aed…
AAEL001448-RH	Up in Y7	XM_021845356.1	XP_001659295	lysophosphatidylcholine acyltransferase isoform X1 [Aedes aegypti] >ref|XP_021700994.1| lysophosphatidylcholine acyltransferase isoform X1 [Aedes aegypti] >ref|XP_021701001.1| lysophosphatidylcholine acyltransferase isoform X1 [Aedes aegypti] >ref|XP_021701012.1| lysophosphatidylcholine acyltransferase isoform X1 [Aedes aegypti] >ref|XP_021701026.1| lysophosphatidylcholine acyltransferase isoform…
AAEL015298-RB	Up in Y7	XM_021843233.1	XP_021698925	protein ABHD1 [Aedes aegypti] >ref|XP_021698926.1| protein ABHD1 [Aedes aegypti] >ref|XP_021698927.1| protein ABHD1 [Aedes aegypti] >ref|XP_021698928.1| protein ABHD1 [Aedes aegypti] >ref|XP_021698929.1| protein ABHD1 [Aedes aegypti] >gb|EAT32449.1| AAEL015298-PA [Aedes aegypti] >gb|EAT37296.1| AAEL010695-PA [Aedes aegypti]
AAEL019662-RB	Up in Y7	XM_021845624.1	XP_021701316	histone acetyltransferase KAT7 isoform X2 [Aedes aegypti]
AAEL026522-RA	Up in Y7	XM_021851892.1	XP_021707584	RNA-binding protein 28 [Aedes aegypti]
AAEL019845-RC	Up in Y7	XM_021850561.1	XP_021706252	uncharacterized protein LOC5577433 isoform X1 [Aedes aegypti] >ref|XP_021706253.1| uncharacterized protein LOC5577433 isoform X1 [Aedes aegypti]
AAEL019449-RC	Up in Y7	XM_021853461.1	XP_019533835	homeobox protein extradenticle isoform X1 [Aedes albopictus] >ref|XP_021709153.1| homeobox protein extradenticle isoform X1 [Aedes aegypti] >ref|XP_021709154.1| homeobox protein extradenticle isoform X1 [Aedes aegypti] >ref|XP_021709155.1| homeobox protein extradenticle isoform X1 [Aedes aegypti] >ref|XP_021709156.1| homeobox protein extradenticle isoform X1 [Aedes aegypti]
AAEL019793-RE	Up in Y7	XM_021847701.1	XP_021703400	uncharacterized protein LOC5573942 isoform X6 [Aedes aegypti]
AAEL006836-RB	Up in Y7	XM_001652207.2	XP_001652257	dihydropteridine reductase isoform X2 [Aedes aegypti] >gb|EAT41526.1| AAEL006836-PB [Aedes aegypti]
AAEL011857-RA	Up in Y7	XM_001661949.2	XP_001661999	serine/threonine-protein kinase RIO1 [Aedes aegypti] >gb|EAT36017.1| AAEL011857-PA [Aedes aegypti]
AAEL028239-RE	Up in Y7	XM_021849617.1	XP_021705302	ubiquitin domain-containing protein 1 [Aedes aegypti] >ref|XP_021705303.1| ubiquitin domain-containing protein 1 [Aedes aegypti] >ref|XP_021705304.1| ubiquitin domain-containing protein 1 [Aedes aegypti] >ref|XP_021705305.1| ubiquitin domain-containing protein 1 [Aedes aegypti] >ref|XP_021705307.1| ubiquitin domain-containing protein 1 [Aedes aegypti] >ref|XP_021705308.1| ubiquitin domain-contain…
AAEL010190-RG	Up in Y7	XM_021842730.1	XP_021698423	FH1/FH2 domain-containing protein 1 isoform X5 [Aedes aegypti]
AAEL001363-RA	Up in Y7	XM_001653132.2	XP_001653182	U6 snRNA-associated Sm-like protein LSm2 [Aedes aegypti] >ref|XP_019554374.1| U6 snRNA-associated Sm-like protein LSm2 [Aedes albopictus] >ref|XP_019562189.1| U6 snRNA-associated Sm-like protein LSm2 [Aedes albopictus] >ref|XP_029719591.1| U6 snRNA-associated Sm-like protein LSm2 [Aedes albopictus] >ref|XP_035910610.1| U6 snRNA-associated Sm-like protein LSm2 [Anopheles stephensi] >ref|XP_0381191…
AAEL010376-RB	Up in Y7	XM_021843359.1	XP_021699051	protein SHQ1 homolog [Aedes aegypti]
AAEL005016-RA	Up in Y7	XM_001650159.2	XP_001650209	malectin-A [Aedes aegypti] >ref|XP_021703612.1| malectin-A [Aedes aegypti] >ref|XP_021703613.1| malectin-A [Aedes aegypti] >ref|XP_021703614.1| malectin-A [Aedes aegypti] >gb|EAT43540.1| AAEL005016-PA [Aedes aegypti]
AAEL007658-RO	Up in Y7	XM_021838991.1	XP_021694681	partitioning defective 3 homolog isoform X4 [Aedes aegypti] >ref|XP_021694682.1| partitioning defective 3 homolog isoform X4 [Aedes aegypti] >ref|XP_021694683.1| partitioning defective 3 homolog isoform X4 [Aedes aegypti] >ref|XP_021694684.1| partitioning defective 3 homolog isoform X4 [Aedes aegypti] >ref|XP_021694685.1| partitioning defective 3 homolog isoform X4 [Aedes aegypti] >ref|XP_0216946…
AAEL018333-RC	Up in Y7	XM_021839708.1	XP_001650493	uncharacterized protein LOC5566132 [Aedes aegypti] >ref|XP_021695398.1| uncharacterized protein LOC5566132 [Aedes aegypti] >ref|XP_021695399.1| uncharacterized protein LOC5566132 [Aedes aegypti] >ref|XP_021695400.1| uncharacterized protein LOC5566132 [Aedes aegypti]
AAEL008719-RA	Up in Y7	XM_001659400.2	XP_001659450	probable small nuclear ribonucleoprotein G [Aedes aegypti] >ref|XP_019532916.1| probable small nuclear ribonucleoprotein G [Aedes albopictus] >ref|XP_029719095.1| probable small nuclear ribonucleoprotein G [Aedes albopictus] >gb|EAT39487.1| AAEL008719-PA [Aedes aegypti] >gb|KXJ72321.1| hypothetical protein RP20_CCG018364 [Aedes albopictus]
AAEL013688-RA	Up in Y7	XM_001660535.2	XP_001660585	WD repeat-containing protein 89 [Aedes aegypti] >gb|EAT34049.1| AAEL013688-PA [Aedes aegypti]
AAEL014344-RA	Up in Y7	XM_001648484.2	XP_001648534	zinc metalloproteinase-disintegrin-like EoMP06 [Aedes aegypti] >ref|XP_021693627.1| zinc metalloproteinase-disintegrin-like EoMP06 [Aedes aegypti] >ref|XP_021693628.1| zinc metalloproteinase-disintegrin-like EoMP06 [Aedes aegypti] >ref|XP_021693629.1| zinc metalloproteinase-disintegrin-like EoMP06 [Aedes aegypti]
AAEL005593-RB	Up in Y7	XM_021855673.1	XP_021711365	uncharacterized protein LOC5566701 isoform X1 [Aedes aegypti]
AAEL003433-RC	Up in Y7	XM_021853645.1	XP_021709337	copper-transporting ATPase 1 isoform X3 [Aedes aegypti]
AAEL022010-RA	Up in Y7	XR_002500149.1	EAT38519	AAEL009613-PB [Aedes aegypti]
AAEL002322-RA	Up in Y7	XM_001661331.2	XP_001661381	uncharacterized protein LOC5574346 [Aedes aegypti] >gb|EAT46493.1| AAEL002322-PA [Aedes aegypti]
AAEL015110-RD	Up in Y7	XM_021846005.1	XP_021701697	venom dipeptidyl peptidase 4 isoform X1 [Aedes aegypti] >ref|XP_021701700.1| venom dipeptidyl peptidase 4 isoform X1 [Aedes aegypti]
AAEL010576-RB	Up in Y7	XM_001654599.2	XP_001654649	modifier of mdg4 isoform X41 [Aedes aegypti] >gb|EAT37397.1| AAEL010576-PB [Aedes aegypti]
AAEL000709-RB	Up in Y7	XM_001650217.3	XP_001650267	NF-kappa-B inhibitor cactus isoform X1 [Aedes aegypti]
AAEL027505-RB	Up in Y7	XM_001653669.2	XP_001653719	mitochondrial inner membrane protein COX18 [Aedes aegypti] >ref|XP_011493059.2| mitochondrial inner membrane protein COX18 [Aedes aegypti]
AAEL011086-RC	Up in Y7	XM_021844505.1	XP_001661395	zinc finger protein Elbow [Aedes aegypti] >ref|XP_021700196.1| zinc finger protein Elbow [Aedes aegypti] >ref|XP_021700197.1| zinc finger protein Elbow [Aedes aegypti]
AAEL005473-RF	Up in Y7	XR_002502268.1	XP_021708933	uncharacterized protein CG10915 isoform X1 [Aedes aegypti]
AAEL011052-RA	Up in Y7	XM_001661279.2	XP_001661329	putative methyltransferase C9orf114 [Aedes aegypti] >gb|EAT36903.1| AAEL011052-PA [Aedes aegypti]
AAEL000115-RA	Up in Y7	XM_001657634.2	XP_001657684	ribosomal RNA-processing protein 7 homolog A [Aedes aegypti] >gb|EAT32231.1| AAEL015658-PA [Aedes aegypti]
AAEL006401-RA	Up in Y7	XM_001657745.2	XP_001657795	thioredoxin-like protein 4A [Aedes aegypti] >ref|XP_019551666.1| thioredoxin-like protein 4A [Aedes albopictus] >gb|ABF18401.1| U4/U6.U5 snRNP/mitosis protein DIM1 component [Aedes aegypti] >gb|EAT42010.1| AAEL006401-PA [Aedes aegypti] >gb|KXJ78243.1| hypothetical protein RP20_CCG005205 [Aedes albopictus]
AAEL007077-RA	Up in Y7	XM_001658056.2	XP_001658106	cysteine and histidine-rich domain-containing protein [Aedes aegypti] >gb|EAT41267.1| AAEL007077-PA [Aedes aegypti]
AAEL019771-RC	Up in Y7	XM_021844669.1	XP_021700361	semaphorin-1A isoform X4 [Aedes aegypti]
AAEL005202-RA	Up in Y7	XM_001650447.2	XP_001650497	golgin subfamily A member 6-like protein 22 [Aedes aegypti]
AAEL007988-RA	Up in Y7	XM_001658740.2	XP_001658790	trafficking protein particle complex subunit 3 isoform X2 [Aedes aegypti]
AAEL013992-RC	Up in Y7	XM_021841743.1	XP_001657257	protein Asterix [Aedes aegypti] >ref|XP_021697435.1| protein Asterix [Aedes aegypti] >ref|XP_021697436.1| protein Asterix [Aedes aegypti]
AAEL001767-RD	Up in Y7	XR_002500144.1	ABF18117	signal anchor-containing conserved peptide [Aedes aegypti] >gb|EAT47109.1| AAEL001767-PA [Aedes aegypti] >gb|EAT47110.1| AAEL001767-PC [Aedes aegypti]
AAEL011925-RA	Up in Y7	XM_001662019.2	XP_001662069	28S ribosomal protein S31, mitochondrial [Aedes aegypti]
AAEL006239-RC	Up in Y7	XM_021855586.1	XP_001651832	glycerol kinase [Aedes aegypti] >ref|XP_021711277.1| glycerol kinase [Aedes aegypti] >ref|XP_021711278.1| glycerol kinase [Aedes aegypti]
AAEL000278-RC	Up in Y7	XM_021852967.1	XP_021708658	NAD kinase isoform X1 [Aedes aegypti] >ref|XP_021708659.1| NAD kinase isoform X1 [Aedes aegypti]
AAEL006921-RA	Up in Y7	XM_001652279.2	XP_001652329	calmodulin isoform X2 [Aedes aegypti] >ref|XP_021705847.1| calmodulin isoform X2 [Aedes aegypti] >ref|XP_021705849.1| calmodulin isoform X2 [Aedes aegypti] >ref|XP_021705850.1| calmodulin isoform X2 [Aedes aegypti] >ref|XP_021705851.1| calmodulin isoform X2 [Aedes aegypti] >ref|XP_021705852.1| calmodulin isoform X2 [Aedes aegypti] >gb|EAT41444.1| AAEL006921-PA [Aedes aegypti]
AAEL014578-RG	Up in Y7	XM_021840708.1	XP_021696396	E3 ubiquitin-protein ligase MARCH6 [Aedes aegypti] >ref|XP_021696397.1| E3 ubiquitin-protein ligase MARCH6 [Aedes aegypti] >ref|XP_021696398.1| E3 ubiquitin-protein ligase MARCH6 [Aedes aegypti] >ref|XP_021696399.1| E3 ubiquitin-protein ligase MARCH6 [Aedes aegypti] >ref|XP_021696400.1| E3 ubiquitin-protein ligase MARCH6 [Aedes aegypti] >ref|XP_021696401.1| E3 ubiquitin-protein ligase MARCH6 [Aed…
AAEL023125-RB	Up in Y7	XM_021838648.1	XP_021694340	uncharacterized protein LOC5572392 [Aedes aegypti]
AAEL010974-RB	Up in Y7	XM_021842739.1	XP_021698430	uncharacterized protein LOC5574157 [Aedes aegypti] >ref|XP_021698431.1| uncharacterized protein LOC5574157 [Aedes aegypti] >ref|XP_021698432.1| uncharacterized protein LOC5574157 [Aedes aegypti] >ref|XP_021698433.1| uncharacterized protein LOC5574157 [Aedes aegypti]
AAEL007699-RG	Up in Y7	XM_001652778.2	XP_001652827	60S ribosomal protein L9 [Aedes aegypti] >ref|XP_001652828.1| 60S ribosomal protein L9 [Aedes aegypti] >ref|XP_001652829.1| 60S ribosomal protein L9 [Aedes aegypti] >ref|XP_019540820.1| 60S ribosomal protein L9 [Aedes albopictus] >ref|XP_019540821.1| 60S ribosomal protein L9 [Aedes albopictus] >ref|XP_019540822.1| 60S ribosomal protein L9 [Aedes albopictus] >gb|ABF18255.1| ribosomal protein L9 [A…
AAEL010768-RA	Up in Y7	XM_001654830.2	XP_001654880	alpha-ketoglutarate-dependent dioxygenase alkB homolog 4 [Aedes aegypti] >gb|EAT37208.1| AAEL010768-PA [Aedes aegypti]
AAEL003739-RC	Up in Y7	XM_021843601.1	XP_021699293	coiled-coil domain-containing protein 102A isoform X2 [Aedes aegypti]
AAEL006640-RA	Up in Y7	XM_001652098.2	XP_001652148	probable ATP-dependent RNA helicase DDX55 homolog [Aedes aegypti] >gb|EAT41737.1| AAEL006640-PA [Aedes aegypti]
AAEL006502-RA	Up in Y7	XM_001651945.2	XP_001651995	pre-rRNA-processing protein TSR2 homolog [Aedes aegypti] >gb|EAT41929.1| AAEL006502-PA [Aedes aegypti]
AAEL019625-RC	Up in Y7	XM_021849543.1	XP_021705235	protein winged eye-like isoform X5 [Aedes aegypti]
AAEL002442-RA	Up in Y7	XM_001655242.2	XP_001655292	uncharacterized protein LOC5580151 [Aedes aegypti] >gb|EAT46375.1| AAEL002442-PA [Aedes aegypti]
AAEL014238-RD	Up in Y7	XM_001648214.2	XP_021702972	aromatic-L-amino-acid decarboxylase isoform X1 [Aedes aegypti]
AAEL007414-RA	Up in Y7	XM_001658301.2	XP_001658351	protein FAM136A [Aedes aegypti]
AAEL011866-RA	Up in Y7	XM_001661948.2	XP_019536409	LOW QUALITY PROTEIN: DNA-directed RNA polymerase III subunit RPC8-like [Aedes albopictus] >ref|XP_029724280.1| DNA-directed RNA polymerase III subunit RPC8 [Aedes albopictus] >ref|XP_029724292.1| DNA-directed RNA polymerase III subunit RPC8-like [Aedes albopictus] >gb|KXJ78562.1| hypothetical protein RP20_CCG004224 [Aedes albopictus] >gb|KXJ80836.1| hypothetical protein RP20_CCG023125 [Aedes albo…
AAEL008733-RB	Up in Y7	XM_021848933.1	XP_021704625	uncharacterized protein LOC5571000 isoform X1 [Aedes aegypti]
AAEL013844-RB	Up in Y7	XM_021839041.1	XP_021694733	acyl-CoA-binding protein [Aedes aegypti]
AAEL013369-RA	Up in Y7	XM_001663460.2	XP_001663510	trafficking protein particle complex subunit 1 [Aedes aegypti] >gb|EAT34381.1| AAEL013369-PA [Aedes aegypti]
AAEL002337-RA	Up in Y7	XM_001661316.2	XP_001661366	probable prefoldin subunit 4 [Aedes aegypti] >gb|EAT46478.1| AAEL002337-PA [Aedes aegypti]
AAEL021860-RA	Up in Y7	XM_021845793.1	XP_021701485	probable methyltransferase BMT2 homolog [Aedes aegypti]
AAEL006416-RC	Up in Y7	XM_021842013.1	XP_021697703	transformer-2 protein homolog alpha isoform X1 [Aedes aegypti] >ref|XP_021697704.1| transformer-2 protein homolog alpha isoform X1 [Aedes aegypti] >ref|XP_021697705.1| transformer-2 protein homolog alpha isoform X1 [Aedes aegypti]
AAEL023715-RA	Up in Y7	XR_002500379.1	not available	not available
AAEL008945-RA	Up in Y7	XM_001653563.2	XP_001653613	NADH dehydrogenase (ubiquinone) complex I, assembly factor 6 homolog [Aedes aegypti] >gb|EAT39219.1| AAEL008945-PA [Aedes aegypti]
AAEL023829-RG	Up in Y7	XM_021839228.1	XP_021694920	protein retinal degeneration B isoform X3 [Aedes aegypti]
AAEL009642-RA	Up in Y7	XM_001653841.2	XP_001653891	cathepsin B-like cysteine proteinase 3 [Aedes aegypti] >gb|EAT38475.1| AAEL009642-PA [Aedes aegypti]
AAEL008596-RA	Up in Y7	XM_021846515.1	XP_021702207	protein spaetzle 3 [Aedes aegypti] >ref|XP_021702208.1| protein spaetzle 3 [Aedes aegypti] >ref|XP_021702209.1| protein spaetzle 3 [Aedes aegypti] >gb|EAT39601.1| AAEL008596-PA [Aedes aegypti]
AAEL011719-RA	Up in Y7	XM_001661808.2	XP_001661858	nucleoporin Nup43 [Aedes aegypti]
AAEL027055-RA	Up in Y7	XM_021850901.1	XP_021706593	rRNA-processing protein FYV7-like [Aedes aegypti]
AAEL011666-RA	Up in Y7	XM_001661773.2	XP_001661823	39S ribosomal protein L41, mitochondrial [Aedes aegypti] >gb|EAT36239.1| AAEL011666-PA [Aedes aegypti]
AAEL018323-RC	Up in Y7	XM_001649163.2	XP_001649213	ribosome-binding protein 1 isoform X2 [Aedes aegypti]
AAEL001619-RA	Up in Y7	XM_001659710.2	XP_001659760	exosome complex component CSL4 [Aedes aegypti]
AAEL011877-RB	Up in Y7	XM_021843443.1	XP_001662010	protein arginine N-methyltransferase 7 isoform X1 [Aedes aegypti] >ref|XP_021699135.1| protein arginine N-methyltransferase 7 isoform X1 [Aedes aegypti]
AAEL003650-RB	Up in Y7	XM_021849448.1	EDS44660	inhibitor of growth protein 1 [Culex quinquefasciatus]
AAEL000422-RB	Up in Y7	XM_001656393.2	XP_001656443	U3 small nucleolar RNA-associated protein 15 homolog [Aedes aegypti] >gb|EAT48545.1| AAEL000422-PA [Aedes aegypti]
AAEL009153-RA	Up in Y7	XM_001653648.2	EAT39004	AAEL009153-PA [Aedes aegypti]
AAEL025600-RA	Up in Y7	XM_021853487.1	XP_021709179	pre-mRNA-splicing factor SYF1 [Aedes aegypti]
AAEL025250-RC	Up in Y7	XM_021837553.1	EAT35082	AAEL012727-PA [Aedes aegypti]
AAEL007607-RA	Up in Y7	XM_001658448.2	XP_001658498	uncharacterized protein LOC5569406 [Aedes aegypti]
AAEL026800-RB	Up in Y7	XR_002501393.1	not available	not available
AAEL007289-RA	Up in Y7	XM_001652592.2	XP_001652642	surfeit locus protein 6 homolog [Aedes aegypti] >gb|EAT41014.1| AAEL007289-PA [Aedes aegypti]
AAEL020299-RA	Up in Y7	XM_021846073.1	XP_021701765	roundabout homolog 1 [Aedes aegypti]
AAEL023729-RA	Up in Y7	XM_021852277.1	XP_021707969	trypsin 5G1-like [Aedes aegypti]
AAEL006865-RB	Up in Y7	XM_021851088.1	XP_021706780	target of rapamycin complex 1 subunit mip1 [Aedes aegypti]
AAEL006870-RG	Up in Y7	XM_021850671.1	XP_001652281	sorting nexin-17 [Aedes aegypti] >ref|XP_021706358.1| sorting nexin-17 [Aedes aegypti] >ref|XP_021706359.1| sorting nexin-17 [Aedes aegypti] >ref|XP_021706360.1| sorting nexin-17 [Aedes aegypti] >ref|XP_021706361.1| sorting nexin-17 [Aedes aegypti] >ref|XP_021706362.1| sorting nexin-17 [Aedes aegypti] >ref|XP_021706363.1| sorting nexin-17 [Aedes aegypti] >gb|EAT41496.1| AAEL006870-PA [Aedes aegyp…
AAEL026025-RA	Up in Y7	XM_001663726.2	XP_001663776	protein G12 [Aedes aegypti] >ref|XP_021701761.1| protein G12 [Aedes aegypti] >ref|XP_021701762.1| protein G12-like [Aedes aegypti] >ref|XP_021712126.1| protein G12-like [Aedes aegypti] >gb|AAL05408.1| microvilli membrane protein [Aedes aegypti] >gb|EAT34153.1| AAEL013577-PC [Aedes aegypti] >gb|EAT34155.1| AAEL013577-PB [Aedes aegypti] >gb|EAT37592.1| AAEL010431-PA [Aedes aegypti]
AAEL013715-RA	Up in Y7	XM_001663848.2	XP_001663898	trypsin 5G1-like [Aedes aegypti]
AAEL022336-RA	Up in Y7	XR_002499257.1	XP_001851379	60S ribosomal protein L7 [Culex quinquefasciatus] >gb|EDS33449.1| 60S ribosomal protein L7 [Culex quinquefasciatus]
AAEL009438-RA	Up in Y7	XM_001660004.2	XP_001660054	ATP-dependent DNA helicase DDX11 [Aedes aegypti] >gb|EAT38683.1| AAEL009438-PA [Aedes aegypti]
AAEL008370-RA	Up in Y7	XM_001653175.3	XP_001653225	protein peste [Aedes aegypti] >ref|XP_021709728.1| protein peste [Aedes aegypti] >ref|XP_021709729.1| protein peste [Aedes aegypti] >ref|XP_021709730.1| protein peste [Aedes aegypti] >ref|XP_021709732.1| protein peste [Aedes aegypti] >ref|XP_021709733.1| protein peste [Aedes aegypti] >ref|XP_021709734.1| protein peste [Aedes aegypti]
AAEL014972-RE	Up in Y7	XM_021842671.1	XP_021698361	facilitated trehalose transporter Tret1 [Aedes aegypti] >ref|XP_021698362.1| facilitated trehalose transporter Tret1 [Aedes aegypti] >ref|XP_021698363.1| facilitated trehalose transporter Tret1 [Aedes aegypti] >ref|XP_021698364.1| facilitated trehalose transporter Tret1 [Aedes aegypti] >ref|XP_021698365.1| facilitated trehalose transporter Tret1 [Aedes aegypti] >ref|XP_029722402.1| facilitated tr…
AAEL009166-RA	Up in Y7	XM_001656328.2	XP_001656378	protein G12 isoform X1 [Aedes aegypti] >ref|XP_001659784.2| protein G12 isoform X1 [Aedes aegypti] >gb|EAT34669.1| AAEL013127-PB [Aedes aegypti]
AAEL007404-RB	Up in Y7	XM_021848506.1	XP_021704193	homeobox protein 5 isoform X2 [Aedes aegypti]
AAEL008389-RE	Up in Y7	XM_021848566.1	XP_021704258	kinase D-interacting substrate of 220 kDa isoform X9 [Aedes aegypti] >ref|XP_021704259.1| kinase D-interacting substrate of 220 kDa isoform X9 [Aedes aegypti] >ref|XP_021704260.1| kinase D-interacting substrate of 220 kDa isoform X9 [Aedes aegypti]
AAEL009166-RB	Up in Y7	XM_021846072.1	XP_021701764	protein G12 isoform X2 [Aedes aegypti] >ref|XP_021712858.1| protein G12 isoform X2 [Aedes aegypti]
AAEL005342-RA	Up in Y7	XM_021854892.1	XP_021710584	protein ABHD18 [Aedes aegypti]
AAEL002318-RA	Up in Y7	XM_001661182.2	XP_001661232	zinc finger C4H2 domain-containing protein isoform X2 [Aedes aegypti] >ref|XP_021708015.1| zinc finger C4H2 domain-containing protein-like isoform X2 [Aedes aegypti] >gb|EAT46517.1| AAEL002318-PA [Aedes aegypti]
AAEL010202-RA	Up in Y7	XM_001660626.2	XP_001660676	trypsin 5G1-like [Aedes aegypti] >gb|ACV07666.1| serine protease VII [Aedes aegypti] >gb|EAT34028.1| AAEL013713-PA [Aedes aegypti]
AAEL026981-RA	Up in Y7	XM_001663726.2	XP_001663776	protein G12 [Aedes aegypti] >ref|XP_021701761.1| protein G12 [Aedes aegypti] >ref|XP_021701762.1| protein G12-like [Aedes aegypti] >ref|XP_021712126.1| protein G12-like [Aedes aegypti] >gb|AAL05408.1| microvilli membrane protein [Aedes aegypti] >gb|EAT34153.1| AAEL013577-PC [Aedes aegypti] >gb|EAT34155.1| AAEL013577-PB [Aedes aegypti] >gb|EAT37592.1| AAEL010431-PA [Aedes aegypti]
AAEL010243-RB	Up in Y7	XM_021847160.1	XP_021702850	anoctamin-10 [Aedes aegypti] >ref|XP_021702851.1| anoctamin-10 [Aedes aegypti] >ref|XP_021702852.1| anoctamin-10 [Aedes aegypti] >ref|XP_021702853.1| anoctamin-10 [Aedes aegypti] >ref|XP_021702854.1| anoctamin-10 [Aedes aegypti]
AAEL025965-RA	Up in Y7	XM_021857244.1	XP_001649534	negative elongation factor B [Aedes aegypti] >ref|XP_021695113.1| negative elongation factor B [Aedes aegypti] >ref|XP_021712935.1| negative elongation factor B [Aedes aegypti] >ref|XP_021712936.1| negative elongation factor B [Aedes aegypti] >gb|EAT32993.1| AAEL014752-PA [Aedes aegypti]
AAEL009660-RC	Up in Y7	XM_021850587.1	XP_021706279	serine/arginine repetitive matrix protein 2 isoform X3 [Aedes aegypti]
AAEL012072-RB	Up in Y7	XM_001662186.2	RXG60188	histone H3 [Armadillidium vulgare]
AAEL015073-RB	Up in Y7	XM_021846195.1	XP_021701887	T-box protein H15 [Aedes aegypti]
AAEL000967-RB	Up in Y7	XM_021852786.1	XP_021708478	transmembrane channel-like protein 7 [Aedes aegypti] >ref|XP_021708479.1| transmembrane channel-like protein 7 [Aedes aegypti] >ref|XP_021708480.1| transmembrane channel-like protein 7 [Aedes aegypti] >ref|XP_021708481.1| transmembrane channel-like protein 7 [Aedes aegypti] >ref|XP_021708483.1| transmembrane channel-like protein 7 [Aedes aegypti]
AAEL026069-RB	Up in Y7	XM_021842570.1	XP_021698262	acetyl-CoA carboxylase isoform X4 [Aedes aegypti] >ref|XP_021698263.1| acetyl-CoA carboxylase isoform X4 [Aedes aegypti]
AAEL009088-RH	Up in Y7	XM_021839774.1	XP_021695461	epsin-1 isoform X1 [Aedes aegypti] >ref|XP_021695462.1| epsin-1 isoform X1 [Aedes aegypti] >ref|XP_021695463.1| epsin-1 isoform X1 [Aedes aegypti] >ref|XP_021695464.1| epsin-1 isoform X1 [Aedes aegypti] >ref|XP_021695465.1| epsin-1 isoform X1 [Aedes aegypti] >ref|XP_021695466.1| epsin-1 isoform X2 [Aedes aegypti] >ref|XP_021695467.1| epsin-1 isoform X1 [Aedes aegypti] >ref|XP_021695468.1| epsin-1…
AAEL013712-RA	Up in Y7	XM_001663845.2	EAT34030	AAEL013706-PA [Aedes aegypti]
AAEL003318-RA	Up in Y7	XM_001663496.2	XP_001663546	peptide transporter family 1 [Aedes aegypti]
AAEL007601-RA	Up in Y7	XM_001658441.2	XP_001658491	trypsin 5G1-like [Aedes aegypti]
AAEL004083-RJ	Up in Y7	XM_021855604.1	XP_021711288	echinoderm microtubule-associated protein-like 2 isoform X1 [Aedes aegypti] >ref|XP_021711289.1| echinoderm microtubule-associated protein-like 2 isoform X1 [Aedes aegypti] >ref|XP_021711290.1| echinoderm microtubule-associated protein-like 2 isoform X1 [Aedes aegypti] >ref|XP_021711291.1| echinoderm microtubule-associated protein-like 2 isoform X1 [Aedes aegypti] >ref|XP_021711292.1| echinoderm …
AAEL010196-RA	Up in Y7	XM_001660623.2	XP_001660673	trypsin 5G1-like [Aedes aegypti] >gb|ACV07665.1| serine protease VI [Aedes aegypti]
AAEL015156-RA	Up in Y7	XM_001650755.2	XP_001650805	uncharacterized protein LOC5566413 [Aedes aegypti] >gb|EAT32637.1| AAEL015156-PA [Aedes aegypti]
AAEL025386-RA	Up in Y7	XR_002498688.1	not available	not available
AAEL009596-RA	Up in Y7	XM_001660231.2	XP_001660281	sterol O-acyltransferase 1 [Aedes aegypti]
AAEL024236-RG	Up in Y7	XM_021838426.1	XP_021694121	DNA-binding protein RFX2 isoform X8 [Aedes aegypti]
AAEL014820-RB	Up in Y7	XM_021850820.1	XP_021706508	uncharacterized protein LOC5565331 isoform X1 [Aedes aegypti]
AAEL003742-RA	Up in Y7	XM_001657154.2	XP_001657204	glucosylceramidase [Aedes aegypti]
AAEL010932-RC	Up in Y7	XM_021848642.1	XP_021704334	uncharacterized protein LOC110677665 isoform X2 [Aedes aegypti]

## Sheet: N7Y1
Gene	Expression	Nucleotide	Protein	Description
AAEL009131-RA	Up in N7	XM_001653640.3	XP_001653690	cytochrome P450 6d3 [Aedes aegypti] >gb|EAT39047.1| AAEL009131-PA [Aedes aegypti]
AAEL012547-RA	Up in N7	XM_021844525.1	XP_021700217	serine/threonine-protein kinase 11-interacting protein isoform X2 [Aedes aegypti]
AAEL015255-RL	Up in N7	XM_021847178.1	XP_021702870	phosphatidylinositol 4-phosphate 5-kinase type-1 beta isoform X14 [Aedes aegypti] >ref|XP_021702871.1| phosphatidylinositol 4-phosphate 5-kinase type-1 beta isoform X14 [Aedes aegypti]
AAEL008262-RB	Up in N7	XM_021844489.1	XP_021700181	F-box/LRR-repeat protein 14 [Aedes aegypti]
AAEL000185-RD	Up in N7	XM_021852886.1	XP_001658942	eukaryotic translation initiation factor 5 [Aedes aegypti] >ref|XP_021708576.1| eukaryotic translation initiation factor 5 [Aedes aegypti] >ref|XP_021708577.1| eukaryotic translation initiation factor 5 [Aedes aegypti] >ref|XP_021708578.1| eukaryotic translation initiation factor 5 [Aedes aegypti] >gb|EAT48834.1| AAEL000185-PA [Aedes aegypti]
AAEL020530-RB	Up in N7	XM_021841765.1	XP_021697452	integral membrane protein GPR155 [Aedes aegypti] >ref|XP_021697453.1| integral membrane protein GPR155 [Aedes aegypti] >ref|XP_021697454.1| integral membrane protein GPR155 [Aedes aegypti] >ref|XP_021697455.1| integral membrane protein GPR155 [Aedes aegypti] >ref|XP_021697456.1| integral membrane protein GPR155 [Aedes aegypti] >ref|XP_021697457.1| integral membrane protein GPR155 [Aedes aegypti] …
AAEL001532-RD	Up in N7	XM_021850476.1	XP_001659550	protein yippee-like CG15309 isoform X1 [Aedes aegypti] >ref|XP_021706166.1| protein yippee-like CG15309 isoform X1 [Aedes aegypti] >ref|XP_021706167.1| protein yippee-like CG15309 isoform X1 [Aedes aegypti] >ref|XP_021706168.1| protein yippee-like CG15309 isoform X1 [Aedes aegypti] >ref|XP_021706169.1| protein yippee-like CG15309 isoform X1 [Aedes aegypti] >ref|XP_021706170.1| protein yippee-like…
AAEL020128-RA	Up in N7	XM_021840796.1	XP_021696498	glycogen-binding subunit 76A isoform X4 [Aedes aegypti]
AAEL023003-RA	Up in N7	XR_002502526.1	XP_029718519	putative GPI-anchored protein pfl2 [Aedes albopictus] >ref|XP_029718520.1| putative GPI-anchored protein pfl2 [Aedes albopictus] >gb|KXJ76859.1| hypothetical protein RP20_CCG008818 [Aedes albopictus]
AAEL019686-RB	Up in N7	XM_021838488.1	XP_021694178	uncharacterized protein LOC5564410 [Aedes aegypti] >ref|XP_021694179.1| uncharacterized protein LOC5564410 [Aedes aegypti] >ref|XP_021694180.1| uncharacterized protein LOC5564410 [Aedes aegypti]
AAEL006539-RF	Up in N7	XM_021840929.1	XP_021696615	serine/threonine-protein kinase 3 [Aedes aegypti] >ref|XP_021696617.1| serine/threonine-protein kinase 3 [Aedes aegypti] >ref|XP_021696618.1| serine/threonine-protein kinase 3 [Aedes aegypti] >ref|XP_021696619.1| serine/threonine-protein kinase 3 [Aedes aegypti] >ref|XP_021696620.1| serine/threonine-protein kinase 3 [Aedes aegypti] >ref|XP_021696621.1| serine/threonine-protein kinase 3 [Aedes aeg…
AAEL006740-RB	Up in N7	XM_021841381.1	XP_021697073	uncharacterized protein LOC5568318 isoform X2 [Aedes aegypti]
AAEL006451-RB	Up in N7	XM_021847845.1	EAT41974	AAEL006451-PA [Aedes aegypti]
AAEL004853-RF	Up in N7	XM_021842054.1	XP_001649900	glycerol kinase [Aedes aegypti] >ref|XP_021697742.1| glycerol kinase [Aedes aegypti] >ref|XP_021697743.1| glycerol kinase [Aedes aegypti] >ref|XP_021697744.1| glycerol kinase [Aedes aegypti] >ref|XP_021697745.1| glycerol kinase [Aedes aegypti] >ref|XP_021697746.1| glycerol kinase [Aedes aegypti] >gb|EAT43737.1| AAEL004853-PA [Aedes aegypti]
AAEL003605-RA	Up in N7	XM_021839190.1	XP_001657046	splicing factor 3B subunit 1 isoform X1 [Aedes aegypti] >gb|EAT45112.1| AAEL003605-PA [Aedes aegypti]
AAEL010381-RA	Up in N7	XM_021843356.1	XP_021699048	UDP-glucuronosyltransferase 2C1 isoform X1 [Aedes aegypti]
AAEL002358-RC	Up in N7	XM_021842321.1	XP_021698013	protein zer-1 homolog isoform X1 [Aedes aegypti] >ref|XP_021698014.1| protein zer-1 homolog isoform X1 [Aedes aegypti]
AAEL004916-RA	Up in N7	XM_021841214.1	XP_021696906	D-glucuronyl C5-epimerase isoform X2 [Aedes aegypti]
AAEL023444-RA	Up in N7	XM_001650334.2	XP_001650384	zinc finger protein GLI2 [Aedes aegypti]
AAEL009607-RP	Up in N7	XM_021843124.1	XP_021698816	protein lingerer isoform X12 [Aedes aegypti]
AAEL024618-RC	Up in N7	XM_021848006.1	XP_021703698	uncharacterized protein LOC5569804 isoform X4 [Aedes aegypti]
AAEL012110-RB	Up in N7	XM_021838756.1	XP_001655856	aminopeptidase N isoform X1 [Aedes aegypti]
AAEL012117-RB	Up in N7	XR_002500886.1	XP_021702947	mitochondrial carrier protein Rim2 [Aedes aegypti]
AAEL022980-RA	Up in N7	XR_002502357.1	QPA18340	Ago2 [Aedes aegypti]
AAEL013092-RD	Up in N7	XM_021846064.1	XP_021701754	solute carrier family 12 member 9 isoform X1 [Aedes aegypti] >ref|XP_021701755.1| solute carrier family 12 member 9 isoform X1 [Aedes aegypti] >ref|XP_021701756.1| solute carrier family 12 member 9 isoform X1 [Aedes aegypti]
AAEL025995-RA	Up in N7	XR_002499986.1	EAT45101	AAEL003593-PA [Aedes aegypti]
AAEL026911-RB	Up in N7	XM_021854802.1	XP_021710494	uncharacterized protein LOC110679593 isoform X2 [Aedes aegypti]
AAEL000193-RE	Up in N7	XM_021853286.1	XP_001658906	N-lysine methyltransferase KMT5A-B [Aedes aegypti] >ref|XP_021708975.1| N-lysine methyltransferase KMT5A-B [Aedes aegypti] >ref|XP_021708976.1| N-lysine methyltransferase KMT5A-B [Aedes aegypti] >ref|XP_021708977.1| N-lysine methyltransferase KMT5A-B [Aedes aegypti] >ref|XP_021708978.1| N-lysine methyltransferase KMT5A-B [Aedes aegypti] >gb|EAT48798.1| AAEL000193-PA [Aedes aegypti]
AAEL019701-RA	Up in N7	XM_021851772.1	XP_021707464	UPF0769 protein CG18675 [Aedes aegypti]
AAEL013684-RH	Up in N7	XM_021838375.1	XP_001663859	uncharacterized protein LOC5578392 isoform X3 [Aedes aegypti] >ref|XP_021694039.1| uncharacterized protein LOC5578392 isoform X3 [Aedes aegypti] >ref|XP_021694049.1| uncharacterized protein LOC5578392 isoform X3 [Aedes aegypti] >ref|XP_021694059.1| uncharacterized protein LOC5578392 isoform X3 [Aedes aegypti] >ref|XP_021694061.1| uncharacterized protein LOC5578392 isoform X3 [Aedes aegypti] >ref|…
AAEL017512-RD	Up in N7	XM_021855058.1	XP_021710750	beta-glucuronidase isoform X1 [Aedes aegypti]
AAEL022867-RB	Up in N7	XM_021842954.1	XP_021698645	1-acyl-sn-glycerol-3-phosphate acyltransferase delta [Aedes aegypti] >ref|XP_021698646.1| 1-acyl-sn-glycerol-3-phosphate acyltransferase delta [Aedes aegypti]
AAEL021303-RA	Up in N7	XM_021838192.1	XP_021693884	transcription factor grauzone isoform X1 [Aedes aegypti]
AAEL009863-RG	Up in N7	XM_021843012.1	XP_001654053	protein I'm not dead yet [Aedes aegypti] >ref|XP_021698700.1| protein I'm not dead yet [Aedes aegypti] >ref|XP_021698701.1| protein I'm not dead yet [Aedes aegypti] >ref|XP_021698702.1| protein I'm not dead yet [Aedes aegypti] >ref|XP_021698703.1| protein I'm not dead yet [Aedes aegypti] >ref|XP_021698704.1| protein I'm not dead yet [Aedes aegypti] >gb|EAT38219.1| AAEL009863-PA [Aedes aegypti] >g…
AAEL021813-RA	Up in N7	XR_002502746.1	XP_029722938	uncharacterized protein LOC115263750 [Aedes albopictus] >gb|KXJ80128.1| hypothetical protein RP20_CCG026451 [Aedes albopictus]
AAEL024341-RA	Up in N7	XR_002501100.1	XP_038110221	phospholipase D2 isoform X2 [Culex quinquefasciatus]
AAEL001446-RC	Up in N7	XM_021845220.1	XP_021700883	T-complex protein 11-like protein 1 isoform X1 [Aedes aegypti] >ref|XP_021700894.1| T-complex protein 11-like protein 1 isoform X1 [Aedes aegypti] >ref|XP_021700903.1| T-complex protein 11-like protein 1 isoform X1 [Aedes aegypti] >ref|XP_021700912.1| T-complex protein 11-like protein 1 isoform X1 [Aedes aegypti] >ref|XP_021700918.1| T-complex protein 11-like protein 1 isoform X1 [Aedes aegypti] …
AAEL021748-RE	Up in N7	XM_021844464.1	XP_001652724	mucin-17 isoform X1 [Aedes aegypti] >ref|XP_021700152.1| mucin-17 isoform X1 [Aedes aegypti] >ref|XP_021700153.1| mucin-17 isoform X1 [Aedes aegypti] >ref|XP_021700154.1| mucin-17 isoform X1 [Aedes aegypti] >ref|XP_021700156.1| mucin-17 isoform X1 [Aedes aegypti] >ref|XP_021700157.1| mucin-17 isoform X1 [Aedes aegypti]
AAEL006685-RA	Up in N7	XM_021845874.1	XP_035772637	guanine nucleotide-binding protein subunit gamma-e isoform X1 [Anopheles albimanus]
AAEL005147-RB	Up in N7	XM_021854902.1	XP_021710594	DNA-binding protein D-ETS-4 isoform X2 [Aedes aegypti] >ref|XP_021710596.1| DNA-binding protein D-ETS-4 isoform X2 [Aedes aegypti]
AAEL001532-RH	Up in N7	XM_021850480.1	XP_040231747	protein yippee-like CG15309 isoform X1 [Anopheles coluzzii] >ref|XP_040231749.1| protein yippee-like CG15309 isoform X1 [Anopheles coluzzii] >ref|XP_040231750.1| protein yippee-like CG15309 isoform X1 [Anopheles coluzzii] >ref|XP_040231751.1| protein yippee-like CG15309 isoform X1 [Anopheles coluzzii]
AAEL002887-RG	Up in N7	XM_021844850.1	XP_021700542	armadillo segment polarity protein isoform X5 [Aedes aegypti]
AAEL026220-RD	Up in N7	XM_021843583.1	XP_021699275	F-box/WD repeat-containing protein 7 isoform X2 [Aedes aegypti]
AAEL009890-RB	Up in N7	XM_021848833.1	XP_021704525	uncharacterized protein LOC5572554 isoform X1 [Aedes aegypti]
AAEL012062-RI	Up in N7	XM_021837809.1	XP_029733758	sodium/potassium-transporting ATPase subunit alpha isoform X4 [Aedes albopictus]
AAEL004791-RD	Up in N7	XM_021855820.1	XP_021711512	sorting nexin-13 isoform X3 [Aedes aegypti]
AAEL014296-RE	Up in N7	XM_021843146.1	XP_001648403	motile sperm domain-containing protein 2 [Aedes aegypti] >ref|XP_021698835.1| motile sperm domain-containing protein 2 [Aedes aegypti] >ref|XP_021698836.1| motile sperm domain-containing protein 2 [Aedes aegypti] >ref|XP_021698837.1| motile sperm domain-containing protein 2 [Aedes aegypti] >ref|XP_021698838.1| motile sperm domain-containing protein 2 [Aedes aegypti] >ref|XP_021698839.1| motile sp…
AAEL008574-RA	Up in N7	XM_001653267.2	XP_001653317	probable peroxisomal acyl-coenzyme A oxidase 1 [Aedes aegypti] >ref|XP_021704356.1| probable peroxisomal acyl-coenzyme A oxidase 1 [Aedes aegypti] >ref|XP_021704357.1| probable peroxisomal acyl-coenzyme A oxidase 1 [Aedes aegypti] >ref|XP_021704358.1| probable peroxisomal acyl-coenzyme A oxidase 1 [Aedes aegypti] >ref|XP_021704359.1| probable peroxisomal acyl-coenzyme A oxidase 1 [Aedes aegypti] …
AAEL025268-RB	Up in N7	XM_021851710.1	XP_021707402	heterogeneous nuclear ribonucleoprotein L isoform X8 [Aedes aegypti]
AAEL017356-RF	Up in N7	XM_021841473.1	XP_021697165	uncharacterized protein LOC5571052 isoform X2 [Aedes aegypti]
AAEL019480-RE	Up in N7	XM_021846348.1	XP_021702040	tyrosine-protein kinase Btk29A isoform X2 [Aedes aegypti]
AAEL009874-RO	Up in N7	XM_021842562.1	XP_021698233	E3 ubiquitin-protein ligase znrf2 isoform X1 [Aedes aegypti] >ref|XP_021698238.1| E3 ubiquitin-protein ligase znrf2 isoform X1 [Aedes aegypti] >ref|XP_021698244.1| E3 ubiquitin-protein ligase znrf2 isoform X1 [Aedes aegypti] >ref|XP_021698249.1| E3 ubiquitin-protein ligase znrf2 isoform X1 [Aedes aegypti] >ref|XP_021698254.1| E3 ubiquitin-protein ligase znrf2 isoform X1 [Aedes aegypti] >ref|XP_02…
AAEL019898-RH	Up in N7	XM_021849625.1	XP_021705317	uncharacterized protein LOC5565208 isoform X2 [Aedes aegypti]
AAEL020846-RA	Up in N7	XM_021842431.1	XP_021698123	uncharacterized protein LOC5568139 [Aedes aegypti] >ref|XP_021698124.1| uncharacterized protein LOC5568139 [Aedes aegypti]
AAEL025199-RB	Up in N7	XM_021854786.1	XP_021710488	C-1-tetrahydrofolate synthase, cytoplasmic isoform X2 [Aedes aegypti]
AAEL002321-RC	Up in N7	XM_021838884.1	XP_001661352	paired box protein Pax-6 isoform X2 [Aedes aegypti]
AAEL003541-RA	Up in N7	XM_001656883.2	XP_001656933	LOW QUALITY PROTEIN: 32 kDa beta-galactoside-binding lectin lec-3 [Aedes aegypti]
AAEL007120-RE	Up in N7	XM_021847279.1	XP_021702971	LIM/homeobox protein Lhx3 isoform X5 [Aedes aegypti]
AAEL009422-RE	Up in N7	XM_001659989.2	XP_001660039	zinc finger protein on ecdysone puffs isoform X3 [Aedes aegypti] >gb|EAT38703.1| AAEL009422-PF [Aedes aegypti] >gb|EAT47659.1| AAEL001279-PB [Aedes aegypti]
AAEL020789-RA	Up in N7	XM_021838700.1	XP_021694390	uncharacterized protein LOC110674569 [Aedes aegypti] >ref|XP_021694391.1| uncharacterized protein LOC110674569 [Aedes aegypti] >ref|XP_021694392.1| uncharacterized protein LOC110674569 [Aedes aegypti] >ref|XP_021694394.1| uncharacterized protein LOC110674569 [Aedes aegypti] >ref|XP_021694397.1| uncharacterized protein LOC110674569 [Aedes aegypti] >ref|XP_021694400.1| uncharacterized protein LOC11…
AAEL024141-RD	Up in N7	XM_021848242.1	XP_021703934	paired amphipathic helix protein Sin3a isoform X1 [Aedes aegypti] >ref|XP_021703935.1| paired amphipathic helix protein Sin3a isoform X1 [Aedes aegypti] >ref|XP_021703936.1| paired amphipathic helix protein Sin3a isoform X1 [Aedes aegypti] >ref|XP_021703937.1| paired amphipathic helix protein Sin3a isoform X1 [Aedes aegypti] >ref|XP_021703938.1| paired amphipathic helix protein Sin3a isoform X1 […
AAEL005463-RE	Up in N7	XM_021853174.1	EAT43061	AAEL005463-PA [Aedes aegypti]
AAEL004415-RD	Up in N7	XM_021851900.1	XP_021707590	poly(U)-binding-splicing factor half pint isoform X2 [Aedes aegypti] >ref|XP_021707591.1| poly(U)-binding-splicing factor half pint isoform X2 [Aedes aegypti] >ref|XP_021707592.1| poly(U)-binding-splicing factor half pint isoform X2 [Aedes aegypti] >ref|XP_021707593.1| poly(U)-binding-splicing factor half pint isoform X2 [Aedes aegypti]
AAEL013770-RB	Up in N7	XM_021842086.1	XP_021697776	PR domain zinc finger protein 1 isoform X1 [Aedes aegypti]
AAEL020264-RD	Up in N7	XM_021845439.1	XP_021701131	protein sidekick isoform X3 [Aedes aegypti]
AAEL026833-RA	Up in N7	XM_021841074.1	XP_021696766	uncharacterized protein LOC110675611 [Aedes aegypti]
AAEL024936-RA	Up in N7	XM_021843300.1	XP_021698992	protein disabled isoform X2 [Aedes aegypti]
AAEL003743-RD	Up in N7	XM_021837446.1	XP_021693138	V-type proton ATPase 116 kDa subunit a isoform X4 [Aedes aegypti]
AAEL026850-RA	Up in N7	XM_021852498.1	XP_021699796	putative nuclease HARBI1 [Aedes aegypti]
AAEL018227-RB	Up in N7	XM_021849086.1	XP_021704777	F-box/LRR-repeat protein 16 [Aedes aegypti] >ref|XP_021704778.1| F-box/LRR-repeat protein 16 [Aedes aegypti]
AAEL001864-RA	Up in N7	XM_001654101.2	XP_001654151	eukaryotic translation initiation factor 4E-binding protein 1 [Aedes aegypti] >gb|ACJ15315.1| eukaryotic initiation factor 4E binding protein [Aedes aegypti] >gb|EAT47005.1| AAEL001864-PA [Aedes aegypti]
AAEL021812-RA	Up in N7	XM_021849158.1	EAT42254	AAEL006190-PA [Aedes aegypti]
AAEL005329-RB	Up in N7	XM_021841053.1	EAT43221	AAEL005329-PA, partial [Aedes aegypti]
AAEL027514-RB	Up in N7	XM_021853619.1	XP_021709311	uncharacterized protein LOC110679302 isoform X2 [Aedes aegypti]
AAEL014618-RA	Up in N7	XM_001649056.2	XP_001649106	probable cytochrome P450 9f2 [Aedes aegypti]
AAEL000590-RA	Up in N7	XM_001648620.3	XP_001648670	E3 ubiquitin-protein ligase MYLIP [Aedes aegypti] >gb|EAT48387.1| AAEL000590-PA [Aedes aegypti]
AAEL002999-RB	Up in N7	XM_021857378.1	XP_001662927	uncharacterized protein LOC5580309 [Aedes aegypti] >ref|XP_021713070.1| uncharacterized protein LOC5580309 [Aedes aegypti] >ref|XP_021713071.1| uncharacterized protein LOC5580309 [Aedes aegypti]
AAEL003075-RA	Up in N7	XM_001663019.2	XP_021699601	zinc finger and BTB domain-containing protein 14 isoform X2 [Aedes aegypti]
AAEL012634-RB	Up in N7	XM_021840827.1	XP_021696519	chaoptin-like [Aedes aegypti]
AAEL024532-RD	Up in N7	XM_021840820.1	XP_021696512	protein artichoke isoform X3 [Aedes aegypti]
AAEL019611-RA	Up in N7	XM_021845488.1	EAT47226	AAEL001659-PA [Aedes aegypti]
AAEL013776-RC	Up in N7	XM_021845157.1	XP_021700849	uncharacterized protein LOC5578593 [Aedes aegypti] >ref|XP_021700850.1| uncharacterized protein LOC5578593 [Aedes aegypti]
AAEL018161-RM	Up in N7	XM_021852633.1	XP_021708325	uncharacterized protein LOC5570887 isoform X1 [Aedes aegypti] >ref|XP_021708326.1| uncharacterized protein LOC5570887 isoform X1 [Aedes aegypti]
AAEL012583-RE	Up in N7	XM_021838045.1	XP_021693737	probable Rho GTPase-activating protein CG5521 isoform X2 [Aedes aegypti]
AAEL000256-RC	Up in N7	XM_021844250.1	XP_001660151	scavenger receptor class B member 1 isoform X1 [Aedes aegypti] >ref|XP_021699940.1| scavenger receptor class B member 1 isoform X1 [Aedes aegypti] >ref|XP_021699942.1| scavenger receptor class B member 1 isoform X1 [Aedes aegypti] >gb|EAT48769.1| AAEL000256-PA [Aedes aegypti]
AAEL012750-RA	Up in N7	XM_001662800.2	XP_001662850	general transcription factor IIH subunit 1 [Aedes aegypti] >ref|XP_021709945.1| general transcription factor IIH subunit 1 [Aedes aegypti]
AAEL003137-RC	Up in N7	XM_021855935.1	XP_021711627	uncharacterized protein LOC5577238 isoform X2 [Aedes aegypti]
AAEL008141-RD	Up in N7	XM_021854837.1	XP_021710526	period circadian protein isoform X1 [Aedes aegypti]
AAEL010977-RB	Up in N7	XM_021853360.1	XP_001661220	ATP-binding cassette sub-family F member 2 [Aedes aegypti] >ref|XP_021709052.1| ATP-binding cassette sub-family F member 2 [Aedes aegypti] >gb|EAT36980.1| AAEL010977-PA [Aedes aegypti]
AAEL006510-RB	Up in N7	XM_021848303.1	XP_021703995	eukaryotic translation initiation factor 4E-binding protein Mextli isoform X1 [Aedes aegypti]
AAEL011519-RA	Up in N7	XM_001661671.2	XP_001661721	solute carrier family 45 member 4 [Aedes aegypti]
AAEL019812-RE	Up in N7	XM_021855369.1	XP_021711061	uncharacterized protein LOC5564138 isoform X3 [Aedes aegypti]
AAEL002390-RA	Up in N7	XM_001655112.2	XP_001655162	Krueppel homolog 1 isoform X1 [Aedes aegypti]
AAEL004986-RA	Up in N7	XM_021845186.1	XP_021700878	protein SMG5 [Aedes aegypti]
AAEL007662-RD	Up in N7	XM_021838952.1	XP_001658552	casein kinase I [Aedes aegypti] >ref|XP_021694640.1| casein kinase I [Aedes aegypti] >ref|XP_021694641.1| casein kinase I [Aedes aegypti] >ref|XP_021694642.1| casein kinase I [Aedes aegypti] >ref|XP_021694643.1| casein kinase I [Aedes aegypti] >ref|XP_021694644.1| casein kinase I [Aedes aegypti] >ref|XP_021694646.1| casein kinase I [Aedes aegypti] >ref|XP_021694647.1| casein kinase I [Aedes aegyp…
AAEL013764-RA	Up in N7	XM_001663920.2	XP_001663970	intraflagellar transport protein 122 homolog [Aedes aegypti] >gb|EAT36690.1| AAEL011246-PA [Aedes aegypti]
AAEL003713-RA	Up in N7	XM_001664013.2	XP_001664063	leucine-rich repeat-containing G-protein coupled receptor 5 [Aedes aegypti] >ref|XP_021699344.1| leucine-rich repeat-containing G-protein coupled receptor 5 [Aedes aegypti] >ref|XP_021699345.1| leucine-rich repeat-containing G-protein coupled receptor 5 [Aedes aegypti] >gb|EAT44957.1| AAEL003713-PA [Aedes aegypti]
AAEL019845-RE	Up in N7	XM_021850564.1	XP_021706254	inositol-trisphosphate 3-kinase A isoform X2 [Aedes aegypti] >ref|XP_021706255.1| inositol-trisphosphate 3-kinase A isoform X2 [Aedes aegypti] >ref|XP_021706256.1| inositol-trisphosphate 3-kinase A isoform X2 [Aedes aegypti]
AAEL019812-RD	Up in N7	XM_021855367.1	XP_021711059	uncharacterized protein LOC5564138 isoform X1 [Aedes aegypti]
AAEL001473-RC	Up in N7	XM_021844909.1	XP_021700601	intersectin-1 isoform X3 [Aedes aegypti]
AAEL000340-RB	Up in N7	XM_021848889.1	XP_021704581	cytochrome P450 4C1 [Aedes aegypti]
AAEL001478-RB	Up in N7	XM_021844984.1	XP_021700676	non-lysosomal glucosylceramidase [Aedes aegypti]
AAEL008478-RB	Up in N7	XM_021840089.1	XP_001659256	27 kDa hemolymph protein [Aedes aegypti] >ref|XP_021695781.1| 27 kDa hemolymph protein [Aedes aegypti]
AAEL026251-RA	Up in N7	XM_021857152.1	XP_021712844	EH domain-binding protein 1 [Aedes aegypti]
AAEL014972-RC	Up in N7	XM_021842669.1	XP_021698361	facilitated trehalose transporter Tret1 [Aedes aegypti] >ref|XP_021698362.1| facilitated trehalose transporter Tret1 [Aedes aegypti] >ref|XP_021698363.1| facilitated trehalose transporter Tret1 [Aedes aegypti] >ref|XP_021698364.1| facilitated trehalose transporter Tret1 [Aedes aegypti] >ref|XP_021698365.1| facilitated trehalose transporter Tret1 [Aedes aegypti] >ref|XP_029722402.1| facilitated tr…
AAEL003452-RB	Up in N7	XM_001656798.2	XP_001656848	coenzyme Q-binding protein COQ10, mitochondrial [Aedes aegypti]
AAEL019578-RC	Up in N7	XM_021848137.1	XP_021703827	uncharacterized protein LOC5565895 isoform X1 [Aedes aegypti] >ref|XP_021703828.1| uncharacterized protein LOC5565895 isoform X1 [Aedes aegypti] >ref|XP_021703829.1| uncharacterized protein LOC5565895 isoform X1 [Aedes aegypti]
AAEL004715-RA	Up in N7	XM_021846802.1	XP_021702494	protein BTG1 [Aedes aegypti] >gb|EAT43873.1| AAEL004715-PA [Aedes aegypti]
AAEL019827-RC	Up in N7	XM_021845511.1	XP_021701201	kinesin-like protein KIF21B isoform X1 [Aedes aegypti] >ref|XP_021701202.1| kinesin-like protein KIF21B isoform X1 [Aedes aegypti] >ref|XP_021701203.1| kinesin-like protein KIF21B isoform X1 [Aedes aegypti] >ref|XP_021701204.1| kinesin-like protein KIF21B isoform X1 [Aedes aegypti]
AAEL027982-RA	Up in N7	XM_021849215.1	XP_021704907	peptidoglycan-recognition protein LE [Aedes aegypti]
AAEL005239-RA	Up in N7	XM_001650488.2	XP_001650538	growth hormone-regulated TBC protein 1-A [Aedes aegypti] >ref|XP_021711634.1| growth hormone-regulated TBC protein 1-A [Aedes aegypti] >ref|XP_021711635.1| growth hormone-regulated TBC protein 1-A [Aedes aegypti] >ref|XP_021711636.1| growth hormone-regulated TBC protein 1-A [Aedes aegypti] >ref|XP_021711637.1| growth hormone-regulated TBC protein 1-A [Aedes aegypti] >ref|XP_021711638.1| growth ho…
AAEL013460-RF	Up in N7	XM_021857336.1	XP_021713024	ecotropic viral integration site 5 ortholog isoform X1 [Aedes aegypti] >ref|XP_021713025.1| ecotropic viral integration site 5 ortholog isoform X1 [Aedes aegypti] >ref|XP_021713026.1| ecotropic viral integration site 5 ortholog isoform X1 [Aedes aegypti] >ref|XP_021713027.1| ecotropic viral integration site 5 ortholog isoform X1 [Aedes aegypti] >ref|XP_021713028.1| ecotropic viral integration sit…
AAEL000172-RC	Up in N7	XM_021854973.1	XP_021710665	uncharacterized protein LOC5570041 isoform X3 [Aedes aegypti]
AAEL004351-RG	Up in N7	XM_021853318.1	XP_021709010	casein kinase I isoform X1 [Aedes aegypti]
AAEL004319-RC	Up in N7	XM_021846944.1	XP_021702636	epidermal growth factor receptor isoform X2 [Aedes aegypti]
AAEL014965-RI	Up in N7	XM_021838076.1	XP_021693766	RNA-binding protein Nova-1 isoform X1 [Aedes aegypti] >ref|XP_021693767.1| RNA-binding protein Nova-1 isoform X1 [Aedes aegypti]
AAEL001570-RC	Up in N7	XM_021840212.1	XP_021695903	uncharacterized protein LOC5571274 [Aedes aegypti] >ref|XP_021695904.1| uncharacterized protein LOC5571274 [Aedes aegypti]
AAEL017116-RD	Up in N7	XR_002501247.1	XP_021705282	hrp65 protein isoform X3 [Aedes aegypti]
AAEL005950-RR	Up in N7	XR_002498648.1	XP_019551146	chloride channel protein 2 isoform X5 [Aedes albopictus] >ref|XP_029710022.1| chloride channel protein 2 isoform X5 [Aedes albopictus]
AAEL019480-RC	Up in N7	XM_021846347.1	XP_021702037	tyrosine-protein kinase Btk29A isoform X1 [Aedes aegypti] >ref|XP_021702038.1| tyrosine-protein kinase Btk29A isoform X1 [Aedes aegypti] >ref|XP_021702039.1| tyrosine-protein kinase Btk29A isoform X1 [Aedes aegypti]
AAEL020000-RA	Up in N7	XM_021855866.1	XP_021711558	uncharacterized protein LOC5572217 [Aedes aegypti]
AAEL019812-RA	Up in N7	XR_002502723.1	XP_021711059	uncharacterized protein LOC5564138 isoform X1 [Aedes aegypti]
AAEL004415-RB	Up in N7	XM_021851898.1	XP_021707590	poly(U)-binding-splicing factor half pint isoform X2 [Aedes aegypti] >ref|XP_021707591.1| poly(U)-binding-splicing factor half pint isoform X2 [Aedes aegypti] >ref|XP_021707592.1| poly(U)-binding-splicing factor half pint isoform X2 [Aedes aegypti] >ref|XP_021707593.1| poly(U)-binding-splicing factor half pint isoform X2 [Aedes aegypti]
AAEL019685-RE	Up in N7	XM_021838139.1	XP_021693829	rho GTPase-activating protein 7 [Aedes aegypti] >ref|XP_021693830.1| rho GTPase-activating protein 7 [Aedes aegypti] >ref|XP_021693831.1| rho GTPase-activating protein 7 [Aedes aegypti] >ref|XP_021693832.1| rho GTPase-activating protein 7 [Aedes aegypti] >ref|XP_021693833.1| rho GTPase-activating protein 7 [Aedes aegypti] >ref|XP_021693834.1| rho GTPase-activating protein 7 [Aedes aegypti] >ref|X…
AAEL012975-RE	Up in N7	XM_021842227.1	XP_021697918	uncharacterized protein LOC5577078 isoform X1 [Aedes aegypti] >ref|XP_021697919.1| uncharacterized protein LOC5577078 isoform X1 [Aedes aegypti]
AAEL021828-RA	Up in N7	XM_021848295.1	XP_021703987	ral GTPase-activating protein subunit beta isoform X5 [Aedes aegypti]
AAEL002850-RA	Up in N7	XM_001655967.2	XP_001656017	protein patched [Aedes aegypti]
AAEL026406-RA	Up in N7	XM_021845461.1	XP_021701153	protein arginine N-methyltransferase 9-like [Aedes aegypti]
AAEL011216-RG	Up in N7	XM_021843573.1	XP_021699261	type 1 phosphatidylinositol 4,5-bisphosphate 4-phosphatase [Aedes aegypti] >ref|XP_021699262.1| type 1 phosphatidylinositol 4,5-bisphosphate 4-phosphatase [Aedes aegypti] >ref|XP_021699263.1| type 1 phosphatidylinositol 4,5-bisphosphate 4-phosphatase [Aedes aegypti] >ref|XP_021699264.1| type 1 phosphatidylinositol 4,5-bisphosphate 4-phosphatase [Aedes aegypti] >ref|XP_021699265.1| type 1 phosphat…
AAEL019499-RB	Up in N7	XM_021854994.1	XP_021710686	protein similar isoform X1 [Aedes aegypti]
AAEL003754-RD	Up in N7	XM_021837508.1	XP_021693200	catenin alpha isoform X2 [Aedes aegypti] >ref|XP_021712301.1| catenin alpha isoform X2 [Aedes aegypti]
AAEL017224-RE	Up in N7	XM_021845475.1	XP_021701167	phosphatidylinositol 3,4,5-trisphosphate 3-phosphatase and dual-specificity protein phosphatase PTEN isoform X3 [Aedes aegypti] >gb|ABM21565.1| PTEN transcript variant 3 [Aedes aegypti]
AAEL022462-RA	Up in N7	XM_021852651.1	XP_021708342	transcription factor E2f1 [Aedes aegypti] >ref|XP_021708343.1| transcription factor E2f1 [Aedes aegypti] >ref|XP_021708344.1| transcription factor E2f1 [Aedes aegypti] >ref|XP_021708345.1| transcription factor E2f1 [Aedes aegypti] >ref|XP_021708346.1| transcription factor E2f1 [Aedes aegypti]
AAEL022970-RA	Up in N7	XM_021846140.1	XP_021701832	putative RNA-binding protein Luc7-like 2 isoform X3 [Aedes aegypti]
AAEL023321-RA	Up in N7	XM_021837963.1	XP_021693655	heat shock protein 70 A1-like [Aedes aegypti]
AAEL004300-RA	Up in N7	XM_001648797.2	XP_001648847	protein lunapark-B [Aedes aegypti] >ref|XP_021701082.1| protein lunapark-B [Aedes aegypti] >ref|XP_021701083.1| protein lunapark-B [Aedes aegypti] >gb|EAT44341.1| AAEL004300-PA [Aedes aegypti]
AAEL008645-RA	Up in N7	XM_001659331.2	XP_001659381	ran-binding protein 9 [Aedes aegypti] >ref|XP_021699652.1| ran-binding protein 9 [Aedes aegypti]
AAEL011918-RG	Up in N7	XM_021852867.1	XP_021708558	patatin-like phospholipase domain-containing protein 3 isoform X4 [Aedes aegypti] >ref|XP_021708559.1| patatin-like phospholipase domain-containing protein 3 isoform X4 [Aedes aegypti]
AAEL011905-RB	Up in N7	XM_021852952.1	XP_021708643	myosin-IB isoform X1 [Aedes aegypti]
AAEL000278-RD	Up in N7	XM_021852968.1	XP_021708660	NAD kinase isoform X2 [Aedes aegypti] >ref|XP_021708661.1| NAD kinase isoform X2 [Aedes aegypti]
AAEL008853-RE	Up in N7	XM_021844578.1	XP_021700270	choline/ethanolamine kinase isoform X5 [Aedes aegypti]
AAEL020373-RB	Up in N7	XM_021857175.1	XP_021694463	uncharacterized protein LOC110674715 [Aedes aegypti] >ref|XP_021694465.1| uncharacterized protein LOC110674715 [Aedes aegypti] >ref|XP_021712867.1| uncharacterized protein LOC5572382 [Aedes aegypti] >ref|XP_021712868.1| uncharacterized protein LOC5572382 [Aedes aegypti]
AAEL005754-RB	Up in N7	XM_021847821.1	XP_021703513	cGMP-dependent protein kinase, isozyme 1 [Aedes aegypti] >ref|XP_021703514.1| cGMP-dependent protein kinase, isozyme 1 [Aedes aegypti]
AAEL009458-RF	Up in N7	XM_021855575.1	XP_001660092	syntaxin-4 isoform X1 [Aedes aegypti] >ref|XP_021711075.1| syntaxin-4 isoform X1 [Aedes aegypti] >gb|EAT38669.1| AAEL009458-PA [Aedes aegypti]
AAEL006476-RB	Up in N7	XM_021844506.1	XP_021700198	zinc finger protein Noc [Aedes aegypti]
AAEL017445-RC	Up in N7	XM_021848316.1	XP_021704008	protein nubbin isoform X3 [Aedes aegypti]
AAEL006879-RC	Up in N7	XR_002499445.1	EAT41482	AAEL006879-PA [Aedes aegypti]
AAEL005023-RC	Up in N7	XM_021847907.1	XP_001650198	palmitoyltransferase ZDHHC23 isoform X1 [Aedes aegypti] >gb|EAT43529.2| AAEL005023-PA [Aedes aegypti]
AAEL022692-RB	Up in N7	XM_021840416.1	XP_021696108	uncharacterized protein LOC5573286 [Aedes aegypti] >ref|XP_021696110.1| uncharacterized protein LOC5573286 [Aedes aegypti]
AAEL001950-RB	Up in N7	XM_021850440.1	XP_021706132	NEDD8 ultimate buster 1 [Aedes aegypti]
AAEL000281-RA	Up in N7	XM_001654746.2	XP_001654796	uncharacterized protein LOC5573767 [Aedes aegypti] >ref|XP_021696920.1| uncharacterized protein LOC5573767 [Aedes aegypti] >ref|XP_021696921.1| uncharacterized protein LOC5573767 [Aedes aegypti] >gb|EAT48726.1| AAEL000281-PA [Aedes aegypti]
AAEL012621-RE	Up in N7	XM_021837950.1	XP_021693642	serine-arginine protein 55 isoform X4 [Aedes aegypti]
AAEL006433-RD	Up in N7	XM_021847849.1	XP_021703538	piezo-type mechanosensitive ion channel component isoform X1 [Aedes aegypti] >ref|XP_021703539.1| piezo-type mechanosensitive ion channel component isoform X1 [Aedes aegypti] >ref|XP_021703540.1| piezo-type mechanosensitive ion channel component isoform X1 [Aedes aegypti] >ref|XP_021703541.1| piezo-type mechanosensitive ion channel component isoform X1 [Aedes aegypti]
AAEL003899-RA	Up in N7	XM_001664237.2	XP_001664287	facilitated trehalose transporter Tret1 [Aedes aegypti] >ref|XP_021704952.1| facilitated trehalose transporter Tret1 [Aedes aegypti] >ref|XP_021704953.1| facilitated trehalose transporter Tret1 [Aedes aegypti] >gb|EAT44800.1| AAEL003899-PA [Aedes aegypti]
AAEL006216-RM	Up in N7	XM_021840805.1	XP_021696497	glycogen-binding subunit 76A isoform X3 [Aedes aegypti]
AAEL013466-RG	Up in N7	XM_021846276.1	XP_021701968	ankyrin-2 isoform X6 [Aedes aegypti]
AAEL007260-RB	Up in N7	XM_021854071.1	XP_001652622	zinc finger protein sens isoform X1 [Aedes aegypti] >gb|EAT41067.1| AAEL007260-PA [Aedes aegypti]
AAEL021092-RI	Up in N7	XM_021853928.1	XP_021709620	LIM domain-binding protein 2 isoform X2 [Aedes aegypti]
AAEL024022-RA	Up in N7	XM_021848177.1	XP_021703869	A-kinase anchor protein 10, mitochondrial [Aedes aegypti]
AAEL009645-RC	Up in N7	XM_001653852.2	XP_001653901	uncharacterized protein LOC5580019 [Aedes aegypti] >ref|XP_001653902.2| uncharacterized protein LOC5580019 [Aedes aegypti]
AAEL012083-RL	Up in N7	XM_021849639.1	XP_021705331	tyrosine-protein phosphatase 10D isoform X4 [Aedes aegypti]
AAEL020508-RA	Up in N7	XM_021839235.1	XP_021694927	protein lava lamp isoform X1 [Aedes aegypti]
AAEL024528-RI	Up in N7	XM_021840724.1	XP_021696416	unconventional myosin-Va isoform X3 [Aedes aegypti]
AAEL011794-RA	Up in N7	XM_021855380.1	XP_021711072	uncharacterized protein LOC5576092 [Aedes aegypti] >ref|XP_021711073.1| uncharacterized protein LOC5576092 [Aedes aegypti] >gb|EAT36102.1| AAEL011794-PA [Aedes aegypti]
AAEL012549-RD	Up in N7	XM_021839286.1	XP_021694978	probable phospholipid-transporting ATPase IF isoform X3 [Aedes aegypti]
AAEL007804-RE	Up in N7	XM_021852108.1	XP_021707800	semaphorin-5A [Aedes aegypti] >ref|XP_021707801.1| semaphorin-5A [Aedes aegypti] >ref|XP_021707802.1| semaphorin-5A [Aedes aegypti] >ref|XP_021707803.1| semaphorin-5A [Aedes aegypti]
AAEL021183-RA	Up in N7	XM_021840563.1	XP_021696255	protein zwilch [Aedes aegypti]
AAEL014406-RB	Up in N7	XM_021838060.1	XP_001648712	PR domain zinc finger protein 5 [Aedes aegypti] >ref|XP_021693752.1| PR domain zinc finger protein 5 [Aedes aegypti]
AAEL025610-RA	Up in N7	XM_021843336.1	XP_021699028	uncharacterized protein LOC110676240 [Aedes aegypti]
AAEL012918-RA	Up in N7	XM_001663002.2	XP_021698653	puromycin-sensitive aminopeptidase isoform X2 [Aedes aegypti]
AAEL009173-RA	Up in N7	XM_001659743.2	XP_001659793	fasciclin-2 isoform X6 [Aedes aegypti]
AAEL000845-RH	Up in N7	XM_021854771.1	XP_021710456	phosphatidylinositol phosphatase PTPRQ [Aedes aegypti] >ref|XP_021710457.1| phosphatidylinositol phosphatase PTPRQ [Aedes aegypti] >ref|XP_021710458.1| phosphatidylinositol phosphatase PTPRQ [Aedes aegypti] >ref|XP_021710459.1| phosphatidylinositol phosphatase PTPRQ [Aedes aegypti] >ref|XP_021710460.1| phosphatidylinositol phosphatase PTPRQ [Aedes aegypti] >ref|XP_021710461.1| phosphatidylinosito…
AAEL025268-RI	Up in N7	XM_021851704.1	XP_021707396	heterogeneous nuclear ribonucleoprotein L isoform X2 [Aedes aegypti]
AAEL023895-RC	Up in N7	XM_021838441.1	XP_021694137	ankyrin repeat and KH domain-containing protein mask isoform X5 [Aedes aegypti]
AAEL021836-RB	Up in N7	XM_021853677.1	XP_021709369	telomere-associated protein RIF1 isoform X1 [Aedes aegypti]
AAEL027364-RA	Up in N7	XM_021852469.1	EAT39969	AAEL008259-PA [Aedes aegypti]
AAEL001532-RB	Up in N7	XM_021850474.1	XP_001659550	protein yippee-like CG15309 isoform X1 [Aedes aegypti] >ref|XP_021706166.1| protein yippee-like CG15309 isoform X1 [Aedes aegypti] >ref|XP_021706167.1| protein yippee-like CG15309 isoform X1 [Aedes aegypti] >ref|XP_021706168.1| protein yippee-like CG15309 isoform X1 [Aedes aegypti] >ref|XP_021706169.1| protein yippee-like CG15309 isoform X1 [Aedes aegypti] >ref|XP_021706170.1| protein yippee-like…
AAEL008190-RA	Up in N7	XM_001658967.2	XP_001659017	protein atonal homolog 8 [Aedes aegypti] >gb|EAT40047.1| AAEL008190-PA [Aedes aegypti]
AAEL021711-RE	Up in N7	XM_021857181.1	XP_021712873	vacuolar protein sorting-associated protein 4A isoform X3 [Aedes aegypti]
AAEL024113-RA	Up in N7	XM_001654008.2	XP_001654058	dynein regulatory complex protein 1 [Aedes aegypti]
AAEL004165-RH	Up in N7	XM_021842665.1	XP_021698350	bone morphogenetic protein receptor type-2 [Aedes aegypti] >ref|XP_021698351.1| bone morphogenetic protein receptor type-2 [Aedes aegypti] >ref|XP_021698352.1| bone morphogenetic protein receptor type-2 [Aedes aegypti] >ref|XP_021698353.1| bone morphogenetic protein receptor type-2 [Aedes aegypti] >ref|XP_021698354.1| bone morphogenetic protein receptor type-2 [Aedes aegypti] >ref|XP_021698355.1|…
AAEL019982-RA	Up in N7	XM_021854122.1	XP_021709814	probable Ras GTPase-activating protein isoform X4 [Aedes aegypti] >ref|XP_021709816.1| probable Ras GTPase-activating protein isoform X4 [Aedes aegypti] >ref|XP_021709817.1| probable Ras GTPase-activating protein isoform X4 [Aedes aegypti] >ref|XP_021709818.1| probable Ras GTPase-activating protein isoform X4 [Aedes aegypti]
AAEL005174-RJ	Up in N7	XM_021839731.1	XP_021695423	uncharacterized protein LOC5566116 isoform X9 [Aedes aegypti]
AAEL010787-RA	Up in N7	XM_001654847.2	XP_001654897	ATP-dependent RNA helicase dbp2 [Aedes aegypti] >gb|EAT37190.1| AAEL010787-PA [Aedes aegypti] >gb|EAT37193.1| AAEL010787-PD [Aedes aegypti]
AAEL009588-RH	Up in N7	XM_021846404.1	XP_021702096	probable nuclear hormone receptor HR3 isoform X4 [Aedes aegypti] >ref|XP_021702097.1| probable nuclear hormone receptor HR3 isoform X4 [Aedes aegypti]
AAEL023114-RD	Up in N7	XR_002499692.1	EAT35309	AAEL012504-PA [Aedes aegypti] >gb|EAT35310.1| AAEL012504-PB [Aedes aegypti]
AAEL018699-RR	Up in N7	XM_021840995.1	XP_021696687	uncharacterized protein LOC5576943 isoform X5 [Aedes aegypti]
AAEL020615-RA	Up in N7	XM_021848196.1	XP_021703888	zinc finger protein ush [Aedes aegypti]
AAEL024195-RC	Up in N7	XM_021842071.1	XP_021697761	MOG interacting and ectopic P-granules protein 1 isoform X1 [Aedes aegypti] >ref|XP_021697762.1| MOG interacting and ectopic P-granules protein 1 isoform X1 [Aedes aegypti] >ref|XP_021697763.1| MOG interacting and ectopic P-granules protein 1 isoform X1 [Aedes aegypti]
AAEL026564-RA	Up in N7	XM_021844835.1	XP_021700527	32 kDa beta-galactoside-binding lectin-like [Aedes aegypti] >gb|EAT45187.1| AAEL003541-PA [Aedes aegypti]
AAEL009477-RC	Up in N7	XM_021843274.1	XP_021698966	uncharacterized protein LOC5572004 isoform X3 [Aedes aegypti]
AAEL024525-RE	Up in N7	XM_021843379.1	XP_021699069	G-protein coupled receptor Mth2 [Aedes aegypti] >ref|XP_021699070.1| G-protein coupled receptor Mth2 [Aedes aegypti] >ref|XP_021699071.1| G-protein coupled receptor Mth2 [Aedes aegypti] >ref|XP_021699072.1| G-protein coupled receptor Mth2 [Aedes aegypti] >ref|XP_021699073.1| G-protein coupled receptor Mth2 [Aedes aegypti]
AAEL024913-RH	Up in N7	XM_021837331.1	EAT33931	AAEL013800-PA [Aedes aegypti]
AAEL020110-RA	Up in N7	XM_021842060.1	XP_021697752	putative uncharacterized protein DDB_G0271606 isoform X1 [Aedes aegypti]
AAEL001434-RJ	Up in N7	XM_021840747.1	XP_021696433	coronin-1C isoform X3 [Aedes aegypti]
AAEL007134-RC	Up in N7	XM_021849179.1	XP_001658157	uncharacterized protein LOC5568792 isoform X1 [Aedes aegypti]
AAEL005845-RB	Up in N7	XM_021852812.1	XP_021708504	LOW QUALITY PROTEIN: spectrin beta chain [Aedes aegypti]
AAEL013863-RE	Up in N7	XM_021852617.1	XP_021708309	phosphatidylinositol-binding clathrin assembly protein LAP isoform X3 [Aedes aegypti]
AAEL018230-RD	Up in N7	XM_021845531.1	XP_021701220	carbohydrate sulfotransferase 5 [Aedes aegypti] >ref|XP_021701221.1| carbohydrate sulfotransferase 5 [Aedes aegypti] >ref|XP_021701222.1| carbohydrate sulfotransferase 5 [Aedes aegypti] >ref|XP_021701223.1| carbohydrate sulfotransferase 5 [Aedes aegypti]
AAEL027514-RA	Up in N7	XM_021853618.1	XP_021709310	uncharacterized protein LOC110679302 isoform X1 [Aedes aegypti]
AAEL001434-RF	Up in N7	XM_021840742.1	XP_021696433	coronin-1C isoform X3 [Aedes aegypti]
AAEL000656-RA	Up in N7	XM_001649756.2	XP_001649806	protein pangolin, isoforms A/H/I/S [Aedes aegypti] >gb|EAT48317.1| AAEL000656-PA [Aedes aegypti]
AAEL009323-RB	Up in N7	XM_021853832.1	XP_021709524	putative carbonic anhydrase 3 [Aedes aegypti]
AAEL026236-RA	Up in N7	XR_002500418.1	not available	not available
AAEL004448-RB	Up in N7	XM_021855161.1	XP_021710853	torsin-like protein isoform X1 [Aedes aegypti]
AAEL013102-RI	Up in N7	XM_021853826.1	XP_021709518	rho guanine nucleotide exchange factor 11 isoform X5 [Aedes aegypti]
AAEL001220-RB	Up in N7	XM_021847365.1	XP_021703057	myosin-VIIa [Aedes aegypti] >ref|XP_021703058.1| myosin-VIIa [Aedes aegypti]
AAEL001840-RA	Up in N7	XM_001654078.2	XP_001654128	carboxypeptidase B [Aedes aegypti]
AAEL029102-RA	Up in N7	XM_001657246.2	XP_021708703	uncharacterized protein LOC5579101 isoform X1 [Aedes aegypti]
AAEL010224-RE	Up in N7	XM_021852910.1	XP_021708599	GATA-binding factor 2 isoform X1 [Aedes aegypti]
AAEL009171-RA	Up in N7	XM_001659741.2	XP_001659791	protein CREBRF homolog isoform X2 [Aedes aegypti] >gb|EAT38994.1| AAEL009171-PA [Aedes aegypti]
AAEL021583-RA	Up in N7	XR_002498664.1	KXJ77950	hypothetical protein RP20_CCG006063 [Aedes albopictus]
AAEL006216-RF	Up in N7	XM_021840807.1	XP_021696490	glycogen-binding subunit 76A isoform X1 [Aedes aegypti]
AAEL026490-RB	Up in N7	XM_021854919.1	XP_039434040	LOW QUALITY PROTEIN: uncharacterized protein LOC120416373 [Culex pipiens pallens]
AAEL003039-RA	Up in N7	XM_001662946.2	XP_001662996	60S ribosomal export protein NMD3 [Aedes aegypti] >gb|EAT45726.1| AAEL003039-PA [Aedes aegypti]
AAEL027483-RG	Up in N7	XM_021847193.1	XP_021702884	tyrosine-protein phosphatase non-receptor type 21 isoform X1 [Aedes aegypti] >ref|XP_021702885.1| tyrosine-protein phosphatase non-receptor type 21 isoform X1 [Aedes aegypti] >ref|XP_021702886.1| tyrosine-protein phosphatase non-receptor type 21 isoform X1 [Aedes aegypti] >ref|XP_021702887.1| tyrosine-protein phosphatase non-receptor type 21 isoform X1 [Aedes aegypti] >ref|XP_021702888.1| tyrosin…
AAEL024535-RC	Up in N7	XM_021857577.1	XP_021713269	cadherin-23 [Aedes aegypti] >ref|XP_021713270.1| cadherin-23 [Aedes aegypti] >ref|XP_021713272.1| cadherin-23 [Aedes aegypti] >ref|XP_021713273.1| cadherin-23 [Aedes aegypti] >ref|XP_021713274.1| cadherin-23 [Aedes aegypti]
AAEL006832-RB	Up in N7	XM_021850267.1	XP_021705959	frizzled-3 [Aedes aegypti]
AAEL009043-RA	Up in N7	XM_001653620.2	XP_001653670	bicaudal D-related protein homolog isoform X1 [Aedes aegypti] >ref|XP_021708887.1| bicaudal D-related protein homolog isoform X1 [Aedes aegypti] >ref|XP_021708888.1| bicaudal D-related protein homolog isoform X1 [Aedes aegypti] >ref|XP_021708889.1| bicaudal D-related protein homolog isoform X1 [Aedes aegypti] >ref|XP_021708890.1| bicaudal D-related protein homolog isoform X1 [Aedes aegypti] >gb|E…
AAEL020878-RF	Up in N7	XM_021842330.1	XP_021698022	large proline-rich protein BAG6 isoform X5 [Aedes aegypti]
AAEL013197-RA	Up in N7	XM_001663326.2	XP_001663376	uncharacterized protein LOC5577450 [Aedes aegypti]
AAEL009991-RA	Up in N7	XM_001660491.2	XP_021707056	myosin-IIIb isoform X3 [Aedes aegypti]
AAEL001119-RC	Up in N7	XM_021854404.1	XP_021710096	DNA-binding protein P3A2 isoform X2 [Aedes aegypti]
AAEL018214-RD	Up in N7	XM_021849776.1	XP_021705465	FERM, RhoGEF and pleckstrin domain-containing protein 2 [Aedes aegypti] >ref|XP_021705466.1| FERM, RhoGEF and pleckstrin domain-containing protein 2 [Aedes aegypti] >ref|XP_021705467.1| FERM, RhoGEF and pleckstrin domain-containing protein 2 [Aedes aegypti] >ref|XP_021705468.1| FERM, RhoGEF and pleckstrin domain-containing protein 2 [Aedes aegypti]
AAEL000101-RA	Up in N7	XM_001657630.2	XP_001657680	luciferin 4-monooxygenase [Aedes aegypti]
AAEL005262-RF	Up in N7	XM_021841155.1	XP_021696842	transmembrane protein 184B isoform X1 [Aedes aegypti] >ref|XP_021696843.1| transmembrane protein 184B isoform X1 [Aedes aegypti] >ref|XP_021696845.1| transmembrane protein 184B isoform X1 [Aedes aegypti] >ref|XP_021696846.1| transmembrane protein 184B isoform X1 [Aedes aegypti] >ref|XP_021696847.1| transmembrane protein 184B isoform X1 [Aedes aegypti]
AAEL019424-RK	Up in N7	XM_021838933.1	XP_021694624	uncharacterized protein LOC5574328 isoform X12 [Aedes aegypti] >ref|XP_021694625.1| uncharacterized protein LOC5574328 isoform X12 [Aedes aegypti] >ref|XP_021694626.1| uncharacterized protein LOC5574328 isoform X12 [Aedes aegypti] >ref|XP_021694627.1| uncharacterized protein LOC5574328 isoform X12 [Aedes aegypti] >ref|XP_021694628.1| uncharacterized protein LOC5574328 isoform X12 [Aedes aegypti] …
AAEL011102-RA	Up in N7	XM_001661371.2	XP_001661421	lysosomal-associated transmembrane protein 4B isoform X1 [Aedes aegypti] >ref|XP_021700102.1| lysosomal-associated transmembrane protein 4B isoform X1 [Aedes aegypti]
AAEL017160-RC	Up in N7	XM_021837324.1	XP_021693015	probable G-protein coupled receptor Mth-like 1 [Aedes aegypti] >ref|XP_021693016.1| probable G-protein coupled receptor Mth-like 1 [Aedes aegypti]
AAEL019611-RC	Up in N7	XM_021845487.1	XP_021701179	uncharacterized protein LOC5571668 isoform X1 [Aedes aegypti]
AAEL019445-RA	Up in N7	XM_021850231.1	XP_021705923	prostaglandin E2 receptor EP4 subtype isoform X1 [Aedes aegypti]
AAEL019578-RA	Up in N7	XM_021848140.1	XP_021703832	uncharacterized protein LOC5565895 isoform X4 [Aedes aegypti]
AAEL005048-RE	Up in N7	XM_011494817.2	XP_001650295	serine palmitoyltransferase small subunit A isoform X2 [Aedes aegypti] >ref|XP_011493119.2| serine palmitoyltransferase small subunit A isoform X2 [Aedes aegypti]
AAEL020033-RF	Up in N7	XM_021839317.1	XP_021695008	uncharacterized protein LOC110674836 isoform X4 [Aedes aegypti]
AAEL012513-RL	Up in N7	XM_021841269.1	XP_021696961	calcium-binding protein E63-1 isoform X5 [Aedes aegypti] >ref|XP_021696962.1| calcium-binding protein E63-1 isoform X5 [Aedes aegypti] >ref|XP_021696963.1| calcium-binding protein E63-1 isoform X5 [Aedes aegypti] >ref|XP_021696964.1| calcium-binding protein E63-1 isoform X5 [Aedes aegypti] >ref|XP_021696965.1| calcium-binding protein E63-1 isoform X5 [Aedes aegypti] >ref|XP_021696966.1| calcium-b…
AAEL019677-RI	Up in N7	XM_021855210.1	XP_021710900	graves disease carrier protein homolog isoform X1 [Aedes aegypti] >ref|XP_021710901.1| graves disease carrier protein homolog isoform X1 [Aedes aegypti] >ref|XP_021710902.1| graves disease carrier protein homolog isoform X1 [Aedes aegypti] >ref|XP_021710903.1| graves disease carrier protein homolog isoform X1 [Aedes aegypti] >ref|XP_021710904.1| graves disease carrier protein homolog isoform X1 […
AAEL017226-RC	Up in N7	XM_021850361.1	XP_011493504	lysosomal alpha-glucosidase [Aedes aegypti] >ref|XP_021706052.1| lysosomal alpha-glucosidase [Aedes aegypti] >ref|XP_021706053.1| lysosomal alpha-glucosidase [Aedes aegypti] >ref|XP_021706055.1| lysosomal alpha-glucosidase [Aedes aegypti] >ref|XP_021706056.1| lysosomal alpha-glucosidase [Aedes aegypti] >ref|XP_021706057.1| lysosomal alpha-glucosidase [Aedes aegypti] >ref|XP_021706058.1| lysosomal…
AAEL020080-RA	Up in N7	XM_021856267.1	XP_021711959	uncharacterized protein LOC5578980 [Aedes aegypti]
AAEL019512-RE	Up in N7	XM_021848682.1	XP_021704373	MAGUK p55 subfamily member 5-A isoform X4 [Aedes aegypti] >ref|XP_021704374.1| MAGUK p55 subfamily member 5-A isoform X4 [Aedes aegypti] >ref|XP_021704375.1| MAGUK p55 subfamily member 5-A isoform X4 [Aedes aegypti] >ref|XP_021704376.1| MAGUK p55 subfamily member 5-A isoform X4 [Aedes aegypti] >ref|XP_021704377.1| MAGUK p55 subfamily member 5-A isoform X4 [Aedes aegypti] >ref|XP_021704378.1| MAGU…
AAEL007271-RG	Up in N7	XM_021845706.1	XP_021701391	carbohydrate-responsive element-binding protein isoform X1 [Aedes aegypti] >ref|XP_021701392.1| carbohydrate-responsive element-binding protein isoform X1 [Aedes aegypti] >ref|XP_021701393.1| carbohydrate-responsive element-binding protein isoform X1 [Aedes aegypti] >ref|XP_021701394.1| carbohydrate-responsive element-binding protein isoform X1 [Aedes aegypti] >ref|XP_021701395.1| carbohydrate-re…
AAEL024757-RA	Up in N7	XM_021840044.1	XP_021695736	probable glutamate receptor [Aedes aegypti]
AAEL003487-RE	Up in N7	XM_021839968.1	XP_021695658	arf-GAP with SH3 domain, ANK repeat and PH domain-containing protein 2 isoform X1 [Aedes aegypti] >ref|XP_021695659.1| arf-GAP with SH3 domain, ANK repeat and PH domain-containing protein 2 isoform X1 [Aedes aegypti] >ref|XP_021695660.1| arf-GAP with SH3 domain, ANK repeat and PH domain-containing protein 2 isoform X1 [Aedes aegypti] >ref|XP_021695661.1| arf-GAP with SH3 domain, ANK repeat and PH…
AAEL004074-RA	Up in N7	XM_001648338.2	XP_001648388	uncharacterized protein LOC5564033 [Aedes aegypti] >ref|XP_021704061.1| uncharacterized protein LOC5564033 [Aedes aegypti]
AAEL017498-RB	Up in N7	XM_021854137.1	XP_021709829	caspase-8 [Aedes aegypti]
AAEL007996-RD	Up in N7	XM_021840555.1	XP_001658794	arf-GAP with dual PH domain-containing protein 1 [Aedes aegypti] >ref|XP_021696245.1| arf-GAP with dual PH domain-containing protein 1 [Aedes aegypti] >ref|XP_021696246.1| arf-GAP with dual PH domain-containing protein 1 [Aedes aegypti] >ref|XP_021696247.1| arf-GAP with dual PH domain-containing protein 1 [Aedes aegypti] >ref|XP_021696248.1| arf-GAP with dual PH domain-containing protein 1 [Aedes…
AAEL006675-RD	Up in N7	XM_021845877.1	XP_021701569	ELAV-like protein 3 isoform X1 [Aedes aegypti] >ref|XP_021701570.1| ELAV-like protein 3 isoform X1 [Aedes aegypti] >ref|XP_021701571.1| ELAV-like protein 3 isoform X1 [Aedes aegypti] >ref|XP_021701572.1| ELAV-like protein 3 isoform X1 [Aedes aegypti]
AAEL011323-RC	Up in N7	XM_021844370.1	XP_021700061	transcription factor HNF-4 homolog isoform X1 [Aedes aegypti] >ref|XP_021700062.1| transcription factor HNF-4 homolog isoform X1 [Aedes aegypti]
AAEL004025-RH	Up in N7	XR_002502655.1	XP_039446512	glucose dehydrogenase [FAD, quinone]-like isoform X6 [Culex pipiens pallens]
AAEL026410-RJ	Up in N7	XM_021855831.1	XP_021711522	putative polypeptide N-acetylgalactosaminyltransferase 9 isoform X2 [Aedes aegypti] >ref|XP_021711523.1| putative polypeptide N-acetylgalactosaminyltransferase 9 isoform X2 [Aedes aegypti] >gb|EAT47781.1| AAEL001121-PA [Aedes aegypti]
AAEL007296-RA	Up in N7	XM_001652611.2	XP_001652661	putative fatty acyl-CoA reductase CG8306 [Aedes aegypti] >ref|XP_021706950.1| putative fatty acyl-CoA reductase CG8306 [Aedes aegypti] >gb|EAT41033.1| AAEL007296-PA [Aedes aegypti]
AAEL002887-RB	Up in N7	XM_021844829.1	XP_001662670	armadillo segment polarity protein isoform X1 [Aedes aegypti] >ref|XP_021700521.1| armadillo segment polarity protein isoform X1 [Aedes aegypti] >ref|XP_021700524.1| armadillo segment polarity protein isoform X1 [Aedes aegypti] >sp|Q17GS9.1| RecName: Full=Armadillo segment polarity protein [Aedes aegypti] >gb|EAT45858.1| AAEL002887-PA [Aedes aegypti]
AAEL009640-RC	Up in N7	XM_021857647.1	XP_021713338	leucine zipper putative tumor suppressor 3 isoform X2 [Aedes aegypti] >ref|XP_021713339.1| leucine zipper putative tumor suppressor 3 isoform X2 [Aedes aegypti]
AAEL026253-RA	Up in N7	XM_021857698.1	XP_021713390	ectopic P granules protein 5 homolog isoform X1 [Aedes aegypti]
AAEL017012-RE	Up in N7	XM_021845615.1	EJY58065	AAEL017012-PC [Aedes aegypti]
AAEL012486-RA	Up in N7	XM_001662568.2	XP_001662618	uncharacterized oxidoreductase dhs-27 [Aedes aegypti] >gb|EAT35344.1| AAEL012486-PA [Aedes aegypti]
AAEL013275-RE	Up in N7	XR_002500776.1	XP_001663434	importin subunit beta isoform X2 [Aedes aegypti] >gb|EAT34489.1| AAEL013275-PA [Aedes aegypti]
AAEL000126-RC	Up in N7	XR_002499906.1	XP_029732302	molybdenum cofactor biosynthesis protein 1-like isoform X2 [Aedes albopictus]
AAEL026995-RA	Up in N7	XM_021848880.1	XP_021704572	peroxisome biogenesis factor 1 [Aedes aegypti]
AAEL006667-RD	Up in N7	XM_021845907.1	XP_021701597	ethanolaminephosphotransferase 1 isoform X1 [Aedes aegypti] >ref|XP_021701598.1| ethanolaminephosphotransferase 1 isoform X1 [Aedes aegypti] >ref|XP_021701599.1| ethanolaminephosphotransferase 1 isoform X1 [Aedes aegypti] >ref|XP_021701600.1| ethanolaminephosphotransferase 1 isoform X1 [Aedes aegypti] >ref|XP_021701601.1| ethanolaminephosphotransferase 1 isoform X1 [Aedes aegypti] >ref|XP_0217016…
AAEL006886-RB	Up in N7	XM_021840292.1	EAT41477	AAEL006886-PA [Aedes aegypti]
AAEL012114-RB	Up in N7	XM_021847250.1	XP_021702942	troponin C isoform X1 [Aedes aegypti] >gb|EJY57802.1| AAEL009336-PB [Aedes aegypti]
AAEL022979-RM	Up in N7	XM_021853124.1	EAT40392	AAEL007888-PA [Aedes aegypti]
AAEL001898-RG	Up in N7	XM_021846999.1	XP_021702690	tubulin polyglutamylase TTLL4 isoform X2 [Aedes aegypti]
AAEL006449-RA	Up in N7	XM_001657776.2	XP_001657826	serine/threonine-protein kinase 40 [Aedes aegypti] >ref|XP_021703529.1| serine/threonine-protein kinase 40 [Aedes aegypti] >gb|EAT41981.1| AAEL006449-PA [Aedes aegypti]
AAEL027096-RA	Up in N7	XM_021855221.1	XP_021710913	cyclic AMP response element-binding protein A isoform X1 [Aedes aegypti]
AAEL001356-RC	Up in N7	XR_002499604.1	XP_019548716	probable splicing factor, arginine/serine-rich 5 isoform X1 [Aedes albopictus] >ref|XP_029733589.1| probable splicing factor, arginine/serine-rich 5 isoform X1 [Aedes albopictus] >ref|XP_029733590.1| probable splicing factor, arginine/serine-rich 5 isoform X1 [Aedes albopictus]
AAEL002318-RC	Up in N7	XM_021856071.1	XP_021708016	zinc finger C4H2 domain-containing protein-like isoform X3 [Aedes aegypti] >ref|XP_021711763.1| zinc finger C4H2 domain-containing protein isoform X3 [Aedes aegypti]
AAEL008578-RB	Up in N7	XM_021851891.1	XP_021707583	polycomb protein suz12 isoform X2 [Aedes aegypti]
AAEL005726-RB	Up in N7	XM_021847092.1	XP_021702784	active breakpoint cluster region-related protein isoform X3 [Aedes aegypti] >ref|XP_021702786.1| active breakpoint cluster region-related protein isoform X3 [Aedes aegypti] >ref|XP_021702794.1| active breakpoint cluster region-related protein isoform X3 [Aedes aegypti]
AAEL009838-RB	Up in N7	XM_021853942.1	XP_001660447	glycogen debranching enzyme isoform X1 [Aedes aegypti] >gb|EAT38235.1| AAEL009838-PA [Aedes aegypti]
AAEL010854-RD	Up in N7	XM_021852676.1	XP_021708368	serine-rich adhesin for platelets isoform X1 [Aedes aegypti]
AAEL002055-RA	Up in N7	XM_001654507.2	XP_001654557	neuroendocrine protein 7B2 [Aedes aegypti] >gb|EAT46754.1| AAEL002055-PA [Aedes aegypti]
AAEL027408-RC	Up in N7	XM_021844022.1	XP_021699714	TRPL translocation defect protein 14 isoform X3 [Aedes aegypti]
AAEL008105-RD	Up in N7	XM_021850631.1	XP_001653117	glutamate--cysteine ligase [Aedes aegypti] >ref|XP_021706323.1| glutamate--cysteine ligase [Aedes aegypti] >ref|XP_021706324.1| glutamate--cysteine ligase [Aedes aegypti] >gb|EAT40137.1| AAEL008105-PA [Aedes aegypti] >gb|EAT40138.1| AAEL008105-PB [Aedes aegypti]
AAEL007364-RA	Up in N7	XM_001658269.2	XP_001658319	8-oxo-dGDP phosphatase NUDT18 [Aedes aegypti] >gb|EAT40954.1| AAEL007364-PA [Aedes aegypti]
AAEL000278-RC	Up in N7	XM_021852967.1	XP_021708658	NAD kinase isoform X1 [Aedes aegypti] >ref|XP_021708659.1| NAD kinase isoform X1 [Aedes aegypti]
AAEL006247-RH	Up in N7	XM_021854782.1	XP_021710468	uncharacterized protein LOC5567679 isoform X1 [Aedes aegypti] >ref|XP_021710469.1| uncharacterized protein LOC5567679 isoform X1 [Aedes aegypti] >ref|XP_021710470.1| uncharacterized protein LOC5567679 isoform X1 [Aedes aegypti] >ref|XP_021710471.1| uncharacterized protein LOC5567679 isoform X1 [Aedes aegypti] >ref|XP_021710472.1| uncharacterized protein LOC5567679 isoform X1 [Aedes aegypti] >ref|…
AAEL020013-RB	Up in N7	XM_021847973.1	XP_021703665	zinc finger protein 431 isoform X1 [Aedes aegypti]
AAEL005955-RB	Up in N7	XM_021854141.1	XP_021709833	caspase-3 [Aedes aegypti]
AAEL009208-RB	Up in N7	XM_021857603.1	XP_021713295	zinc finger protein 853 [Aedes aegypti]
AAEL008164-RC	Up in N7	XR_002501831.1	XP_001658986	protein elav [Aedes aegypti] >gb|EAT40063.1| AAEL008164-PA [Aedes aegypti]
AAEL010451-RA	Up in N7	XM_001660796.2	XP_001660846	girdin [Aedes aegypti]
AAEL009487-RA	Up in N7	XM_001660052.2	XP_001660102	uncharacterized protein LOC5571997 [Aedes aegypti]
AAEL006247-RA	Up in N7	XM_001657568.2	XP_021710468	uncharacterized protein LOC5567679 isoform X1 [Aedes aegypti] >ref|XP_021710469.1| uncharacterized protein LOC5567679 isoform X1 [Aedes aegypti] >ref|XP_021710470.1| uncharacterized protein LOC5567679 isoform X1 [Aedes aegypti] >ref|XP_021710471.1| uncharacterized protein LOC5567679 isoform X1 [Aedes aegypti] >ref|XP_021710472.1| uncharacterized protein LOC5567679 isoform X1 [Aedes aegypti] >ref|…
AAEL026551-RA	Up in N7	XM_021850705.1	XP_021706397	ankyrin-2 [Aedes aegypti]
AAEL001243-RC	Up in N7	XM_021846706.1	XP_021702398	uncharacterized protein LOC5569444 isoform X1 [Aedes aegypti]
AAEL019909-RA	Up in N7	XM_021848755.1	XP_021704447	polyhomeotic-proximal chromatin protein [Aedes aegypti]
AAEL012093-RC	Up in N7	XM_021842550.1	XP_021698241	uncharacterized protein LOC5575820 isoform X1 [Aedes aegypti]
AAEL003104-RE	Up in N7	XM_021840647.1	XP_021696339	RING finger protein nhl-1 isoform X1 [Aedes aegypti] >ref|XP_021696341.1| RING finger protein nhl-1 isoform X1 [Aedes aegypti] >ref|XP_021696342.1| RING finger protein nhl-1 isoform X1 [Aedes aegypti] >ref|XP_021696343.1| RING finger protein nhl-1 isoform X1 [Aedes aegypti] >ref|XP_021696344.1| RING finger protein nhl-1 isoform X1 [Aedes aegypti] >ref|XP_021696345.1| RING finger protein nhl-1 iso…
AAEL005959-RA	Up in N7	XM_001651693.2	XP_001651743	phospholipase B1, membrane-associated [Aedes aegypti]
AAEL015065-RA	Up in N7	XM_001650415.2	XP_001650465	spectrin alpha chain isoform X4 [Aedes aegypti] >gb|EAT32709.1| AAEL015065-PA [Aedes aegypti]
AAEL002091-RB	Up in N7	XM_021855795.1	XP_001654700	ubiquitin thioesterase trabid isoform X1 [Aedes aegypti] >ref|XP_021711487.1| ubiquitin thioesterase trabid isoform X1 [Aedes aegypti] >ref|XP_021711488.1| ubiquitin thioesterase trabid isoform X1 [Aedes aegypti] >ref|XP_021711489.1| ubiquitin thioesterase trabid isoform X1 [Aedes aegypti] >ref|XP_021711490.1| ubiquitin thioesterase trabid isoform X1 [Aedes aegypti] >ref|XP_021711491.1| ubiquitin…
AAEL017445-RD	Up in N7	XM_021848315.1	XP_021704007	protein nubbin isoform X2 [Aedes aegypti]
AAEL019550-RD	Up in N7	XR_002500511.1	XP_021700660	dual specificity tyrosine-phosphorylation-regulated kinase 4 isoform X1 [Aedes aegypti]
AAEL002999-RA	Up in N7	XM_001662877.2	XP_001662927	uncharacterized protein LOC5580309 [Aedes aegypti] >ref|XP_021713070.1| uncharacterized protein LOC5580309 [Aedes aegypti] >ref|XP_021713071.1| uncharacterized protein LOC5580309 [Aedes aegypti]
AAEL026934-RA	Up in N7	XR_002498700.1	KXJ68854	hypothetical protein RP20_CCG001428 [Aedes albopictus]
AAEL011982-RC	Up in N7	XM_021838047.1	XP_021693738	src substrate cortactin-like isoform X1 [Aedes aegypti] >ref|XP_021693739.1| src substrate cortactin-like isoform X1 [Aedes aegypti]
AAEL001549-RD	Up in N7	XM_021840135.1	XP_021695825	serine/threonine-protein kinase N isoform X2 [Aedes aegypti] >ref|XP_021695826.1| serine/threonine-protein kinase N isoform X2 [Aedes aegypti] >ref|XP_021695827.1| serine/threonine-protein kinase N isoform X2 [Aedes aegypti]
AAEL017374-RA	Up in N7	XM_011495351.2	XP_011493653	probable G-protein coupled receptor Mth-like 1 isoform X1 [Aedes aegypti] >ref|XP_021703765.1| probable G-protein coupled receptor Mth-like 1 isoform X1 [Aedes aegypti] >ref|XP_021703766.1| probable G-protein coupled receptor Mth-like 1 isoform X1 [Aedes aegypti] >ref|XP_021703767.1| probable G-protein coupled receptor Mth-like 1 isoform X1 [Aedes aegypti]
AAEL000181-RC	Up in N7	XM_021853632.1	XP_021709324	protein polybromo-1 isoform X10 [Aedes aegypti]
AAEL005305-RD	Up in N7	XM_021851553.1	XP_021707245	dnaJ homolog subfamily B member 6-B isoform X3 [Aedes aegypti] >ref|XP_021707246.1| dnaJ homolog subfamily B member 6-B isoform X3 [Aedes aegypti] >gb|EAT43261.1| AAEL005305-PA [Aedes aegypti]
AAEL024912-RA	Up in N7	XM_021856820.1	XP_021712512	WD repeat-containing and planar cell polarity effector protein fritz-like [Aedes aegypti]
AAEL000077-RB	Up in N7	XM_021849704.1	XP_001647887	zinc transporter 7 [Aedes aegypti] >ref|XP_021705396.1| zinc transporter 7 [Aedes aegypti] >ref|XP_021705397.1| zinc transporter 7 [Aedes aegypti] >gb|EAT48944.1| AAEL000077-PA [Aedes aegypti]
AAEL009895-RD	Up in N7	XM_021849948.1	XP_021705640	endothelin-converting enzyme homolog isoform X1 [Aedes aegypti] >ref|XP_021705641.1| endothelin-converting enzyme homolog isoform X1 [Aedes aegypti] >ref|XP_021705642.1| endothelin-converting enzyme homolog isoform X1 [Aedes aegypti]
AAEL022806-RE	Up in N7	XM_021844016.1	XP_021699699	leucine-rich repeat flightless-interacting protein 2 isoform X1 [Aedes aegypti] >ref|XP_021699708.1| leucine-rich repeat flightless-interacting protein 2 isoform X1 [Aedes aegypti] >ref|XP_021699716.1| leucine-rich repeat flightless-interacting protein 2 isoform X1 [Aedes aegypti] >ref|XP_021699723.1| leucine-rich repeat flightless-interacting protein 2 isoform X1 [Aedes aegypti]
AAEL004875-RB	Up in N7	XM_021838111.1	XP_021693801	F-box only protein 11 [Aedes aegypti] >ref|XP_021693803.1| F-box only protein 11 [Aedes aegypti] >ref|XP_021693804.1| F-box only protein 11 [Aedes aegypti]
AAEL019646-RE	Up in N7	XM_021844015.1	XP_021699707	uncharacterized protein LOC5575624 isoform X8 [Aedes aegypti]
AAEL000719-RB	Up in N7	XM_021848152.1	XP_021703844	rho guanine nucleotide exchange factor 7 isoform X4 [Aedes aegypti]
AAEL019684-RA	Up in N7	XM_021838144.1	XP_021693836	uncharacterized protein LOC23687557 [Aedes aegypti]
AAEL018699-RL	Up in N7	XM_021840999.1	XP_021696691	uncharacterized protein LOC5576943 isoform X9 [Aedes aegypti]
AAEL008726-RB	Up in N7	XM_021852544.1	XP_001653421	uncharacterized protein LOC5570993 [Aedes aegypti] >ref|XP_021708236.1| uncharacterized protein LOC5570993 [Aedes aegypti]
AAEL021495-RA	Up in N7	XM_021843934.1	XP_021699626	DNA ligase 4 [Aedes aegypti]
AAEL011850-RA	Up in N7	XM_001661937.3	XP_001661987	cytochrome P450 315a1, mitochondrial [Aedes aegypti]
AAEL024132-RA	Up in N7	XR_002500901.1	not available	not available
AAEL024539-RA	Up in N7	XM_021848641.1	XP_001654425	F-box/LRR-repeat protein 15 [Aedes aegypti] >ref|XP_021704333.1| F-box/LRR-repeat protein 15-like [Aedes aegypti] >gb|EAT37715.1| AAEL010314-PA [Aedes aegypti]
AAEL018161-RN	Up in N7	XM_021852634.1	XP_021708325	uncharacterized protein LOC5570887 isoform X1 [Aedes aegypti] >ref|XP_021708326.1| uncharacterized protein LOC5570887 isoform X1 [Aedes aegypti]
AAEL009595-RA	Up in N7	XM_001660230.2	XP_001660280	mucin-5AC [Aedes aegypti]
AAEL000523-RG	Up in N7	XM_021854258.1	XP_021709948	RING finger protein 44 isoform X1 [Aedes aegypti] >ref|XP_021709950.1| RING finger protein 44 isoform X1 [Aedes aegypti] >ref|XP_021709951.1| RING finger protein 44 isoform X1 [Aedes aegypti] >ref|XP_021709952.1| RING finger protein 44 isoform X1 [Aedes aegypti] >ref|XP_021709953.1| RING finger protein 44 isoform X1 [Aedes aegypti] >ref|XP_021709954.1| RING finger protein 44 isoform X1 [Aedes aeg…
AAEL012940-RB	Up in N7	XM_001656257.2	XP_001656307	uncharacterized protein LOC5577021 isoform X1 [Aedes aegypti]
AAEL000441-RA	Up in N7	XM_001656409.2	XP_001656459	uncharacterized protein DDB_G0290587 [Aedes aegypti]
AAEL001252-RB	Up in N7	XM_021842772.1	XP_021698465	rap1 GTPase-GDP dissociation stimulator 1 isoform X3 [Aedes aegypti]
AAEL019827-RG	Up in N7	XM_021845516.1	XP_021701208	kinesin-like protein KIF21A isoform X5 [Aedes aegypti]
AAEL002351-RB	Up in N7	XM_021843224.1	XP_021698916	probable ATP-dependent RNA helicase DDX17 isoform X2 [Aedes aegypti]
AAEL006656-RC	Up in N7	XM_021853589.1	XP_021709281	anoctamin-1 isoform X1 [Aedes aegypti]
AAEL009477-RB	Up in N7	XM_001660059.2	XP_001660109	uncharacterized protein LOC5572004 isoform X2 [Aedes aegypti]
AAEL015066-RC	Up in N7	XM_021843521.1	XP_021699212	protein sarah isoform X1 [Aedes aegypti]
AAEL022136-RB	Up in N7	XM_021843543.1	XP_021699235	uncharacterized protein LOC5577147 isoform X3 [Aedes aegypti]
AAEL023253-RA	Up in N7	XM_021848214.1	XP_021703906	probable cationic amino acid transporter [Aedes aegypti] >ref|XP_021703907.1| probable cationic amino acid transporter [Aedes aegypti] >ref|XP_021703908.1| probable cationic amino acid transporter [Aedes aegypti]
AAEL002859-RB	Up in N7	XM_021837621.1	XP_021693313	LOW QUALITY PROTEIN: uncharacterized protein LOC5576344 [Aedes aegypti]
AAEL017116-RA	Up in N7	XM_011494970.2	XP_011493272	hrp65 protein isoform X2 [Aedes aegypti] >gb|EJY57571.1| AAEL017116-PA [Aedes aegypti] >gb|EJY57572.1| AAEL017116-PB [Aedes aegypti]
AAEL005177-RD	Up in N7	XM_021839662.1	XP_021695354	adenylate cyclase type 2 isoform X1 [Aedes aegypti]
AAEL009420-RA	Up in N7	XM_001659993.3	XP_001660043	protein peste [Aedes aegypti] >gb|EAT38707.1| AAEL009420-PA [Aedes aegypti]
AAEL022373-RB	Up in N7	XM_021854526.1	XP_021710218	moesin/ezrin/radixin homolog 2 isoform X2 [Aedes aegypti]
AAEL007258-RD	Up in N7	XM_021854099.1	XP_021709787	titin isoform X1 [Aedes aegypti] >ref|XP_021709788.1| titin isoform X1 [Aedes aegypti] >ref|XP_021709789.1| titin isoform X1 [Aedes aegypti] >ref|XP_021709790.1| titin isoform X1 [Aedes aegypti] >ref|XP_021709791.1| titin isoform X1 [Aedes aegypti] >ref|XP_021709792.1| titin isoform X1 [Aedes aegypti]
AAEL024520-RB	Up in N7	XM_021843392.1	XP_021699084	proton-coupled amino acid transporter 1-like [Aedes aegypti] >ref|XP_021699087.1| proton-coupled amino acid transporter 1-like [Aedes aegypti] >ref|XP_021699092.1| proton-coupled amino acid transporter 1-like [Aedes aegypti]
AAEL019503-RB	Up in N7	XM_021851212.1	XP_029731484	protein phosphatase 1 regulatory subunit 16A isoform X3 [Aedes albopictus]
AAEL023560-RA	Up in N7	XM_021853495.1	XP_021709187	mucin-5AC isoform X4 [Aedes aegypti]
AAEL002838-RA	Up in N7	XM_001655957.2	XP_001656007	uncharacterized protein LOC5576229 [Aedes aegypti]
AAEL008556-RB	Up in N7	XM_021842906.1	XP_021698598	serine/threonine-protein kinase PRP4 homolog isoform X2 [Aedes aegypti]
AAEL002353-RB	Up in N7	XM_021843210.1	XP_021698902	uncharacterized protein LOC5574355 [Aedes aegypti]
AAEL007800-RE	Up in N7	XM_001653931.2	XP_001653981	upstream-binding protein 1 isoform X2 [Aedes aegypti]
AAEL027066-RA	Up in N7	XM_021850791.1	XP_021706483	phospholipase D1 [Aedes aegypti]
AAEL004911-RB	Up in N7	XM_021841213.1	XP_001650004	probable ATP-dependent RNA helicase DDX20 isoform X1 [Aedes aegypti]
AAEL021545-RA	Up in N7	XR_002501740.1	XP_029712346	uncharacterized protein LOC109405537 isoform X1 [Aedes albopictus] >ref|XP_029712347.1| uncharacterized protein LOC109405537 isoform X1 [Aedes albopictus]
AAEL000956-RI	Up in N7	XM_021852800.1	XP_021708485	sorting nexin-8 isoform X1 [Aedes aegypti] >ref|XP_021708486.1| sorting nexin-8 isoform X1 [Aedes aegypti] >ref|XP_021708487.1| sorting nexin-8 isoform X1 [Aedes aegypti] >ref|XP_021708488.1| sorting nexin-8 isoform X1 [Aedes aegypti] >ref|XP_021708489.1| sorting nexin-8 isoform X1 [Aedes aegypti] >ref|XP_021708490.1| sorting nexin-8 isoform X1 [Aedes aegypti] >ref|XP_021708492.1| sorting nexin-8…
AAEL010027-RB	Up in N7	XM_021841930.1	XP_001660574	SEC14-like protein 2 [Aedes aegypti] >ref|XP_021697622.1| SEC14-like protein 2 [Aedes aegypti] >ref|XP_021697623.1| SEC14-like protein 2 [Aedes aegypti] >ref|XP_021697624.1| SEC14-like protein 2 [Aedes aegypti] >ref|XP_021697625.1| SEC14-like protein 2 [Aedes aegypti] >ref|XP_021697626.1| SEC14-like protein 2 [Aedes aegypti] >ref|XP_021697627.1| SEC14-like protein 2 [Aedes aegypti] >ref|XP_021697…
AAEL005400-RJ	Up in N7	XM_021837411.1	XP_021693097	C-terminal-binding protein isoform X1 [Aedes aegypti] >ref|XP_021693099.1| C-terminal-binding protein isoform X1 [Aedes aegypti] >ref|XP_021693100.1| C-terminal-binding protein isoform X1 [Aedes aegypti] >ref|XP_021693101.1| C-terminal-binding protein isoform X1 [Aedes aegypti] >ref|XP_021693102.1| C-terminal-binding protein isoform X1 [Aedes aegypti] >ref|XP_021693103.1| C-terminal-binding prote…
AAEL006636-RA	Up in N7	XM_021851324.1	XP_021707016	substance-K receptor [Aedes aegypti] >ref|XP_021707017.1| substance-K receptor [Aedes aegypti] >gb|QBC65453.1| DSK receptor [Aedes aegypti]
AAEL012595-RE	Up in N7	XM_021839098.1	XP_021694789	uncharacterized protein LOC5576540 isoform X2 [Aedes aegypti] >ref|XP_021694790.1| uncharacterized protein LOC5576540 isoform X2 [Aedes aegypti] >ref|XP_021694791.1| uncharacterized protein LOC5576540 isoform X2 [Aedes aegypti] >ref|XP_021694792.1| uncharacterized protein LOC5576540 isoform X2 [Aedes aegypti] >ref|XP_021694793.1| uncharacterized protein LOC5576540 isoform X2 [Aedes aegypti] >ref|…
AAEL007120-RD	Up in N7	XM_021847278.1	XP_021702970	LIM/homeobox protein Lhx3 isoform X3 [Aedes aegypti]
AAEL024908-RB	Up in N7	XM_021838394.1	XP_021694084	uncharacterized protein LOC5576110 [Aedes aegypti] >ref|XP_021694085.1| uncharacterized protein LOC5576110 [Aedes aegypti] >ref|XP_021694086.1| uncharacterized protein LOC5576110 [Aedes aegypti]
AAEL010783-RD	Up in N7	XM_021845584.1	XP_001654893	sodium/potassium-transporting ATPase subunit beta-2 [Aedes aegypti] >ref|XP_021701274.1| sodium/potassium-transporting ATPase subunit beta-2 [Aedes aegypti] >ref|XP_021701275.1| sodium/potassium-transporting ATPase subunit beta-2 [Aedes aegypti] >ref|XP_021701276.1| sodium/potassium-transporting ATPase subunit beta-2 [Aedes aegypti] >gb|EAT37221.1| AAEL010783-PA [Aedes aegypti]
AAEL019700-RD	Up in Y1	XM_021857625.1	XP_021713312	protein phosphatase PP2A 55 kDa regulatory subunit isoform X1 [Aedes aegypti] >ref|XP_021713313.1| protein phosphatase PP2A 55 kDa regulatory subunit isoform X1 [Aedes aegypti]
AAEL001293-RD	Up in Y1	XM_021847998.1	XP_001653033	clavesin-1 [Aedes aegypti] >ref|XP_021703690.1| clavesin-1 [Aedes aegypti] >gb|AAK73352.1| CRALBP isoform 2 [Aedes aegypti] >gb|AAL85588.1| cellular retinaldehyde-binding protein [Aedes aegypti] >gb|AAL85591.1| cellular retinaldehyde-binding protein [Aedes aegypti] >gb|EAT47600.1| AAEL001293-PA [Aedes aegypti] >gb|EJY57370.1| AAEL001293-PB [Aedes aegypti]
AAEL006865-RB	Up in Y1	XM_021851088.1	XP_021706780	target of rapamycin complex 1 subunit mip1 [Aedes aegypti]
AAEL002318-RA	Up in Y1	XM_001661182.2	XP_001661232	zinc finger C4H2 domain-containing protein isoform X2 [Aedes aegypti] >ref|XP_021708015.1| zinc finger C4H2 domain-containing protein-like isoform X2 [Aedes aegypti] >gb|EAT46517.1| AAEL002318-PA [Aedes aegypti]
AAEL000217-RC	Up in Y1	XM_021855758.1	XP_021711449	serine/threonine-protein kinase Tao isoform X1 [Aedes aegypti] >ref|XP_021711450.1| serine/threonine-protein kinase Tao isoform X1 [Aedes aegypti]
AAEL009596-RA	Up in Y1	XM_001660231.2	XP_001660281	sterol O-acyltransferase 1 [Aedes aegypti]
AAEL013684-RC	Up in Y1	XM_021838338.1	XP_021694030	uncharacterized protein LOC5578392 isoform X2 [Aedes aegypti]
AAEL008693-RA	Up in Y1	XM_021845801.1	XP_021701493	zinc transporter 2 [Aedes aegypti]
AAEL001690-RA	Up in Y1	XM_001659911.2	XP_001659961	chymotrypsin-2 [Aedes aegypti] >gb|EAT47186.1| AAEL001690-PA [Aedes aegypti]
AAEL019469-RA	Up in Y1	XM_021846069.1	XP_001663776	protein G12 [Aedes aegypti] >ref|XP_021701761.1| protein G12 [Aedes aegypti] >ref|XP_021701762.1| protein G12-like [Aedes aegypti] >ref|XP_021712126.1| protein G12-like [Aedes aegypti] >gb|AAL05408.1| microvilli membrane protein [Aedes aegypti] >gb|EAT34153.1| AAEL013577-PC [Aedes aegypti] >gb|EAT34155.1| AAEL013577-PB [Aedes aegypti] >gb|EAT37592.1| AAEL010431-PA [Aedes aegypti]
AAEL008769-RA	Up in Y1	XM_001659442.2	XP_001659492	serine protease SP24D [Aedes aegypti]
AAEL019470-RA	Up in Y1	XM_001660777.2	XP_001660827	protein G12 [Aedes aegypti] >gb|EAT37594.1| AAEL010429-PA [Aedes aegypti]
AAEL001696-RC	Up in Y1	XM_021841461.1	XP_021697153	retinal homeobox protein Rax isoform X2 [Aedes aegypti]
AAEL013127-RC	Up in Y1	XM_021857166.1	XP_021701764	protein G12 isoform X2 [Aedes aegypti] >ref|XP_021712858.1| protein G12 isoform X2 [Aedes aegypti]
AAEL006381-RA	Up in Y1	XM_001651908.2	XP_001651958	sphingomyelin phosphodiesterase [Aedes aegypti]
AAEL010435-RB	Up in Y1	XM_021846068.1	XP_021701760	protein G12 [Aedes aegypti]
AAEL001693-RA	Up in Y1	XM_001659920.2	XP_001659970	serine protease SP24D [Aedes aegypti]
AAEL007432-RA	Up in Y1	XM_001658309.2	XP_001658359	brachyurin [Aedes aegypti] >gb|ACV07660.1| serine protease I [Aedes aegypti]
AAEL001656-RA	Up in Y1	XM_001653714.2	XP_001653764	putative inorganic phosphate cotransporter isoform X2 [Aedes aegypti] >gb|EAT47235.1| AAEL001656-PA [Aedes aegypti]
AAEL015136-RA	Up in Y1	XM_001647755.2	XP_001647805	protein NPC2 homolog [Aedes aegypti]
AAEL013118-RB	Up in Y1	XM_001656325.2	XP_001656375	protein G12 [Aedes aegypti] >gb|EAT34666.1| AAEL013118-PB [Aedes aegypti]
AAEL001887-RD	Up in Y1	XM_001654135.2	XP_001654185	glutamine synthetase 1, mitochondrial [Aedes aegypti] >ref|XP_001654186.1| glutamine synthetase 1, mitochondrial [Aedes aegypti] >gb|EAT46939.1| AAEL001887-PA [Aedes aegypti] >gb|EAT46940.1| AAEL001887-PB [Aedes aegypti]
AAEL002467-RA	Up in Y1	XM_001655315.2	AAL05409	peritrophin [Aedes aegypti]
AAEL009479-RB	Up in Y1	XM_021843405.1	XP_021699097	proton-coupled amino acid transporter-like protein CG1139 [Aedes aegypti]
AAEL004870-RA	Up in Y1	XM_001649920.3	XP_001649970	cytochrome P450 18a1 [Aedes aegypti] >gb|EAT43716.1| AAEL004870-PA [Aedes aegypti]
AAEL003742-RA	Up in Y1	XM_001657154.2	XP_001657204	glucosylceramidase [Aedes aegypti]
AAEL019471-RA	Up in Y1	XM_021846069.1	XP_001663776	protein G12 [Aedes aegypti] >ref|XP_021701761.1| protein G12 [Aedes aegypti] >ref|XP_021701762.1| protein G12-like [Aedes aegypti] >ref|XP_021712126.1| protein G12-like [Aedes aegypti] >gb|AAL05408.1| microvilli membrane protein [Aedes aegypti] >gb|EAT34153.1| AAEL013577-PC [Aedes aegypti] >gb|EAT34155.1| AAEL013577-PB [Aedes aegypti] >gb|EAT37592.1| AAEL010431-PA [Aedes aegypti]
AAEL013127-RB	Up in Y1	XM_001659734.2	XP_001656378	protein G12 isoform X1 [Aedes aegypti] >ref|XP_001659784.2| protein G12 isoform X1 [Aedes aegypti] >gb|EAT34669.1| AAEL013127-PB [Aedes aegypti]
AAEL019537-RA	Up in Y1	XM_021843296.1	XP_021698987	guanine nucleotide-binding protein G(f) subunit alpha [Aedes aegypti] >ref|XP_021698988.1| guanine nucleotide-binding protein G(f) subunit alpha [Aedes aegypti]
AAEL001887-RC	Up in Y1	XM_001654136.2	XP_001654185	glutamine synthetase 1, mitochondrial [Aedes aegypti] >ref|XP_001654186.1| glutamine synthetase 1, mitochondrial [Aedes aegypti] >gb|EAT46939.1| AAEL001887-PA [Aedes aegypti] >gb|EAT46940.1| AAEL001887-PB [Aedes aegypti]
AAEL009165-RA	Up in Y1	XM_001656327.2	XP_021701763	protein G12 isoform X1 [Aedes aegypti] >gb|EAT38997.1| AAEL009165-PA [Aedes aegypti]
AAEL009762-RB	Up in Y1	XM_021838794.1	XP_021694486	cytochrome P450 307a1 [Aedes aegypti]
AAEL004341-RA	Up in Y1	XM_001648892.3	XP_001648942	esterase B1 [Aedes aegypti] >gb|EAT44289.1| AAEL004341-PA, partial [Aedes aegypti]
AAEL011980-RA	Up in Y1	XM_001655743.2	XP_001655793	uncharacterized protein LOC5575647 [Aedes aegypti] >gb|EAT33457.1| AAEL014268-PA [Aedes aegypti]
AAEL001928-RA	Up in Y1	XM_001654263.2	XP_001654313	actin-1 [Aedes aegypti] >sp|P49128.2| RecName: Full=Actin-1; Flags: Precursor [Aedes aegypti] >gb|EAT46902.1| AAEL001928-PA [Aedes aegypti]
AAEL019914-RE	Up in Y1	XM_021848205.1	XP_021703897	uncharacterized protein LOC5568178 isoform X2 [Aedes aegypti]
AAEL002964-RA	Up in Y1	XM_001656183.2	XP_001656233	endochitinase [Aedes aegypti]
AAEL019525-RD	Up in Y1	XM_021838407.1	XP_021694099	uncharacterized protein CG45076 isoform X4 [Aedes aegypti]
AAEL004017-RA	Up in Y1	XM_001648238.2	XP_001648288	DNA polymerase V [Aedes aegypti] >gb|EAT44628.1| AAEL004017-PA [Aedes aegypti]
AAEL026468-RA	Up in Y1	XM_021838883.1	XP_021694575	uncharacterized protein LOC110674739 [Aedes aegypti]
AAEL019728-RG	Up in Y1	XM_021855328.1	XP_021711018	mucin-5AC isoform X1 [Aedes aegypti] >ref|XP_021711020.1| mucin-5AC isoform X1 [Aedes aegypti] >ref|XP_021711021.1| mucin-5AC isoform X1 [Aedes aegypti] >ref|XP_021711022.1| mucin-5AC isoform X1 [Aedes aegypti] >ref|XP_021711023.1| mucin-5AC isoform X1 [Aedes aegypti] >ref|XP_021711024.1| mucin-5AC isoform X1 [Aedes aegypti]
AAEL028100-RA	Up in Y1	XM_021847915.1	XP_021703607	uncharacterized protein LOC110677137 [Aedes aegypti]
AAEL012864-RA	Up in Y1	XM_001662970.2	XP_001663020	uncharacterized protein LOC5576923 [Aedes aegypti]
AAEL017334-RA	Up in Y1	XM_011494827.2	XP_011493129	flocculation protein FLO11 [Aedes aegypti]
AAEL015247-RC	Up in Y1	XM_021857248.1	XP_021712940	membrane alanyl aminopeptidase [Aedes aegypti] >ref|XP_021712941.1| membrane alanyl aminopeptidase [Aedes aegypti]
AAEL003352-RA	Up in Y1	XM_001656630.2	XP_001656680	NHP2-like protein 1 homolog [Aedes aegypti] >ref|XP_001847839.1| NHP2-like protein 1 homolog [Culex quinquefasciatus] >ref|XP_019561486.1| NHP2-like protein 1 homolog [Aedes albopictus] >ref|XP_039443919.1| NHP2-like protein 1 homolog [Culex pipiens pallens] >gb|ABF18367.1| 60S ribosomal protein 15.5kD/SNU13 [Aedes aegypti] >gb|EAT45362.1| AAEL003352-PA [Aedes aegypti] >gb|EDS27034.1| 13 kDa ribo…
AAEL012575-RA	Up in Y1	XM_001662658.2	XP_001662708	putative defense protein 3 [Aedes aegypti]
AAEL015199-RB	Up in Y1	XM_001650869.2	XP_001650919	pre-mRNA-processing factor 19 [Aedes aegypti] >gb|EAT32620.1| AAEL015199-PA [Aedes aegypti] >gb|EAT36374.1| AAEL011535-PA [Aedes aegypti]
AAEL005076-RD	Up in Y1	XM_021838219.1	XP_021693910	endoplasmic reticulum aminopeptidase 2 isoform X2 [Aedes aegypti] >ref|XP_021693911.1| endoplasmic reticulum aminopeptidase 2 isoform X2 [Aedes aegypti]
AAEL012140-RA	Up in Y1	XM_001655821.2	XP_001655871	tRNA-dihydrouridine(20) synthase [NAD(P)+]-like [Aedes aegypti] >gb|EAT35713.1| AAEL012140-PA [Aedes aegypti]
AAEL019458-RA	Up in Y1	XM_021855708.1	XP_021711392	plasma membrane calcium-transporting ATPase 2 isoform X1 [Aedes aegypti] >ref|XP_021711393.1| plasma membrane calcium-transporting ATPase 2 isoform X1 [Aedes aegypti] >ref|XP_021711394.1| plasma membrane calcium-transporting ATPase 2 isoform X1 [Aedes aegypti] >ref|XP_021711395.1| plasma membrane calcium-transporting ATPase 2 isoform X1 [Aedes aegypti] >ref|XP_021711396.1| plasma membrane calcium…
AAEL012265-RA	Up in Y1	XM_001655925.2	XP_001655975	RNA polymerase I-specific transcription initiation factor RRN3 [Aedes aegypti] >gb|EAT35579.1| AAEL012265-PA [Aedes aegypti]
AAEL027905-RB	Up in Y1	XM_021854148.1	XP_021709840	polyadenylate-binding protein-interacting protein 1 isoform X3 [Aedes aegypti]
AAEL009023-RA	Up in Y1	XM_001653602.2	XP_001653652	rRNA methyltransferase 3, mitochondrial [Aedes aegypti]
AAEL007703-RC	Up in Y1	XM_001652789.2	XP_001652839	uncharacterized protein LOC5569528 [Aedes aegypti]
AAEL007496-RA	Up in Y1	XM_001652743.2	XP_001652793	DNA-directed RNA polymerase III subunit RPC3 [Aedes aegypti] >ref|XP_021713261.1| DNA-directed RNA polymerase III subunit RPC3-like [Aedes aegypti] >gb|EAT40806.1| AAEL007496-PA [Aedes aegypti]
AAEL012041-RB	Up in Y1	XM_021857421.1	EAT35825	AAEL012041-PA [Aedes aegypti]
AAEL001378-RA	Up in Y1	XM_001653127.2	XP_001653177	spermine synthase isoform X2 [Aedes aegypti] >gb|EAT47525.1| AAEL001378-PA [Aedes aegypti]
AAEL004809-RA	Up in Y1	XM_001649786.2	XP_001649836	uncharacterized protein LOC5565507 [Aedes aegypti] >gb|EAT33832.1| AAEL013895-PA [Aedes aegypti]
AAEL011171-RA	Up in Y1	XM_001661418.2	XP_001661468	ras-related protein Rab5 [Aedes aegypti] >gb|EAT36769.1| AAEL011171-PA [Aedes aegypti]
AAEL008608-RB	Up in Y1	XM_021846483.1	XP_001653341	uncharacterized protein LOC5570833 [Aedes aegypti] >ref|XP_021702175.1| uncharacterized protein LOC5570833 [Aedes aegypti] >gb|EAT39620.1| AAEL008608-PA [Aedes aegypti]
AAEL009086-RA	Up in Y1	XM_001659647.2	XP_001659697	uncharacterized protein LOC5571446 [Aedes aegypti]
AAEL014556-RC	Up in Y1	XM_001648967.2	XP_001649017	2-oxo-4-hydroxy-4-carboxy-5-ureidoimidazoline decarboxylase [Aedes aegypti] >gb|EAT32724.1| AAEL015053-PB [Aedes aegypti] >gb|EAT33180.1| AAEL014556-PB [Aedes aegypti]
AAEL019845-RC	Up in Y1	XM_021850561.1	XP_021706252	uncharacterized protein LOC5577433 isoform X1 [Aedes aegypti] >ref|XP_021706253.1| uncharacterized protein LOC5577433 isoform X1 [Aedes aegypti]
AAEL009850-RA	Up in Y1	XM_001660402.3	XP_001660452	uncharacterized protein LOC5572513 [Aedes aegypti] >gb|EAT38240.1| AAEL009850-PA [Aedes aegypti]
AAEL023248-RA	Up in Y1	XR_002500896.1	XP_021700330	peptidylprolyl isomerase domain and WD repeat-containing protein 1 isoform X1 [Aedes aegypti] >ref|XP_021700331.1| peptidylprolyl isomerase domain and WD repeat-containing protein 1 isoform X1 [Aedes aegypti]
AAEL018011-RD	Up in Y1	XR_002499680.1	XP_021696914	epidermal growth factor-like protein 7 [Aedes aegypti]
AAEL008941-RD	Up in Y1	XM_001653561.2	XP_001653611	tRNA methyltransferase 10 homolog A [Aedes aegypti] >ref|XP_021696697.1| tRNA methyltransferase 10 homolog A [Aedes aegypti] >gb|EAT39217.1| AAEL008941-PB [Aedes aegypti] >gb|EAT39218.1| AAEL008941-PA [Aedes aegypti]
AAEL006634-RA	Up in Y1	XM_001657868.2	XP_001657918	acetyl-CoA acetyltransferase, mitochondrial [Aedes aegypti]
AAEL005263-RA	Up in Y1	XM_001650548.2	XP_001650598	U3 small nucleolar ribonucleoprotein protein IMP3 [Aedes aegypti]
AAEL006135-RA	Up in Y1	XM_001657471.2	XP_001657521	nuclear cap-binding protein subunit 2 [Aedes aegypti] >sp|Q177H0.1| RecName: Full=Nuclear cap-binding protein subunit 2; AltName: Full=20 kDa nuclear cap-binding protein; AltName: Full=NCBP 20 kDa subunit; Short=CBP20 [Aedes aegypti] >gb|EAT42307.1| AAEL006135-PA [Aedes aegypti]
AAEL008509-RA	Up in Y1	XM_001659277.2	XP_001659327	alanine--tRNA ligase, mitochondrial [Aedes aegypti] >gb|EAT39703.1| AAEL008509-PA [Aedes aegypti]
AAEL022695-RA	Up in Y1	XM_021844577.1	XP_021700269	uncharacterized protein LOC5576459 [Aedes aegypti]
AAEL011622-RA	Up in Y1	XM_001661728.2	XP_001661778	plasma kallikrein [Aedes aegypti]
AAEL020825-RA	Up in Y1	XM_021848026.1	EAT35979	AAEL011895-PA [Aedes aegypti] >tpg|DAA80390.1| TPA_exp: odorant receptor 48 [Aedes aegypti]
AAEL020432-RA	Up in Y1	XM_021843311.1	XP_021699003	probable deoxyhypusine synthase [Aedes aegypti]
AAEL013688-RA	Up in Y1	XM_001660535.2	XP_001660585	WD repeat-containing protein 89 [Aedes aegypti] >gb|EAT34049.1| AAEL013688-PA [Aedes aegypti]
AAEL005977-RF	Up in Y1	XM_021839861.1	XP_021695552	carbohydrate sulfotransferase 11 isoform X1 [Aedes aegypti] >ref|XP_021695553.1| carbohydrate sulfotransferase 11 isoform X1 [Aedes aegypti] >ref|XP_021695554.1| carbohydrate sulfotransferase 11 isoform X1 [Aedes aegypti] >ref|XP_021695555.1| carbohydrate sulfotransferase 11 isoform X1 [Aedes aegypti]
AAEL022454-RA	Up in Y1	XR_002499491.1	EAT35286	AAEL012534-PA [Aedes aegypti]
AAEL002418-RA	Up in Y1	XM_001655179.2	XP_001655229	39S ribosomal protein L27, mitochondrial [Aedes aegypti]
AAEL012038-RB	Up in Y1	XM_021857414.1	XP_001662163	uncharacterized protein LOC5575726 isoform X1 [Aedes aegypti] >gb|EAT35821.1| AAEL012038-PA [Aedes aegypti]
AAEL000709-RB	Up in Y1	XM_001650217.3	XP_001650267	NF-kappa-B inhibitor cactus isoform X1 [Aedes aegypti]
AAEL000755-RA	Up in Y1	XM_001650949.2	XP_001650999	zinc finger HIT domain-containing protein 3 [Aedes aegypti] >gb|EAT48175.1| AAEL000755-PA [Aedes aegypti]
AAEL001615-RA	Up in Y1	XM_001659692.2	XP_001659742	28S ribosomal protein S18c, mitochondrial [Aedes aegypti]
AAEL001038-RA	Up in Y1	XM_001657815.2	XP_001657865	cyclin-dependent kinase 7 [Aedes aegypti] >gb|EAT47870.1| AAEL001038-PA [Aedes aegypti]
AAEL015338-RB	Up in Y1	XM_021857564.1	XP_001657357	uncharacterized protein LOC5567331 [Aedes aegypti] >ref|XP_021713256.1| uncharacterized protein LOC5567331 [Aedes aegypti] >gb|EAT32539.1| AAEL015338-PA [Aedes aegypti]
AAEL017132-RD	Up in Y1	XM_021840500.1	XP_021696190	lysozyme c-1 isoform X1 [Aedes aegypti]
AAEL014363-RB	Up in Y1	XM_021853606.1	XP_021709298	uncharacterized protein LOC5564267 isoform X1 [Aedes aegypti]
AAEL019526-RA	Up in Y1	XM_021842988.1	XP_021698680	uncharacterized protein LOC110676173 [Aedes aegypti]
AAEL020778-RA	Up in Y1	XR_002502465.1	not available	not available
AAEL011455-RA	Up in Y1	XM_001661632.3	XP_001661682	perlucin [Aedes aegypti]
AAEL010867-RA	Up in Y1	XM_001661067.2	XP_001661117	serine protease snake [Aedes aegypti]
AAEL006550-RB	Up in Y1	XM_021840935.1	XP_001652037	E3 ubiquitin-protein ligase RNF185 [Aedes aegypti] >ref|XP_021696627.1| E3 ubiquitin-protein ligase RNF185 [Aedes aegypti] >gb|EAT41844.1| AAEL006550-PA [Aedes aegypti]
AAEL013142-RB	Up in Y1	XM_021843479.1	XP_021699171	polynucleotide 5'-hydroxyl-kinase NOL9 [Aedes aegypti] >ref|XP_021699172.1| polynucleotide 5'-hydroxyl-kinase NOL9 [Aedes aegypti]
AAEL011233-RA	Up in Y1	XM_001661454.2	XP_001661504	probable small nuclear ribonucleoprotein E [Aedes aegypti] >gb|EAT36707.1| AAEL011233-PA [Aedes aegypti]
AAEL005851-RA	Up in Y1	XM_001651460.2	XP_001651510	exosome complex exonuclease RRP42 [Aedes aegypti]
AAEL010679-RA	Up in Y1	XM_001660943.2	XP_001660993	monocyte to macrophage differentiation factor [Aedes aegypti] >gb|EAT37318.1| AAEL010679-PA [Aedes aegypti]
AAEL021179-RA	Up in Y1	XM_021839270.1	XP_021694962	5-hydroxyisourate hydrolase [Aedes aegypti]
AAEL012876-RA	Up in Y1	XM_001656245.2	XP_001656295	box C/D snoRNA protein 1 [Aedes aegypti] >gb|EAT34923.1| AAEL012876-PA [Aedes aegypti] >gb|EJY58005.1| AAEL012876-PB [Aedes aegypti]
AAEL001305-RA	Up in Y1	XM_001652980.2	XP_001653030	uncharacterized protein LOC5569813 [Aedes aegypti]
AAEL006819-RA	Up in Y1	XM_001658006.2	XP_001658056	exosome complex component RRP46 [Aedes aegypti] >gb|EAT41543.1| AAEL006819-PA [Aedes aegypti]
AAEL009382-RA	Up in Y1	XM_001653758.2	XP_001653808	bifunctional lysine-specific demethylase and histidyl-hydroxylase NO66 [Aedes aegypti]
AAEL003141-RA	Up in Y1	XM_001656295.2	XP_001656345	uncharacterized protein LOC5577239 [Aedes aegypti]
AAEL005496-RA	Up in Y1	XM_001650900.2	EAT43029	AAEL005496-PA, partial [Aedes aegypti]
AAEL010178-RB	Up in Y1	XM_021853747.1	XP_001654274	WD repeat-containing protein 87 isoform X1 [Aedes aegypti] >ref|XP_021709439.1| WD repeat-containing protein 87 isoform X1 [Aedes aegypti] >ref|XP_021709440.1| WD repeat-containing protein 87 isoform X1 [Aedes aegypti]
AAEL014821-RA	Up in Y1	XM_001649627.2	XP_001649677	flavin reductase (NADPH) [Aedes aegypti] >gb|EAT32941.1| AAEL014821-PA [Aedes aegypti]
AAEL027111-RD	Up in Y1	XM_021846977.1	XP_021702669	serine/threonine-protein kinase GL21140 isoform X2 [Aedes aegypti]
AAEL000967-RE	Up in Y1	XM_021852791.1	XP_021708478	transmembrane channel-like protein 7 [Aedes aegypti] >ref|XP_021708479.1| transmembrane channel-like protein 7 [Aedes aegypti] >ref|XP_021708480.1| transmembrane channel-like protein 7 [Aedes aegypti] >ref|XP_021708481.1| transmembrane channel-like protein 7 [Aedes aegypti] >ref|XP_021708483.1| transmembrane channel-like protein 7 [Aedes aegypti]
AAEL019727-RA	Up in Y1	XM_021838121.1	XP_021693813	uncharacterized protein LOC5569692 isoform X1 [Aedes aegypti]
AAEL015298-RE	Up in Y1	XM_021843235.1	XP_021698925	protein ABHD1 [Aedes aegypti] >ref|XP_021698926.1| protein ABHD1 [Aedes aegypti] >ref|XP_021698927.1| protein ABHD1 [Aedes aegypti] >ref|XP_021698928.1| protein ABHD1 [Aedes aegypti] >ref|XP_021698929.1| protein ABHD1 [Aedes aegypti] >gb|EAT32449.1| AAEL015298-PA [Aedes aegypti] >gb|EAT37296.1| AAEL010695-PA [Aedes aegypti]
AAEL004972-RI	Up in Y1	XM_021845196.1	XP_021700888	FK506-binding protein 5 isoform X4 [Aedes aegypti]
AAEL013229-RA	Up in Y1	XM_001663357.2	PBC29447	Tubulin alpha-1 chain [Apis cerana cerana]
AAEL013812-RA	Up in Y1	XM_001663951.2	XP_001664001	location of vulva defective 1 [Aedes aegypti]
AAEL021617-RA	Up in Y1	XM_001662861.2	XP_001662911	39S ribosomal protein L43, mitochondrial [Aedes aegypti] >ref|XP_021713094.1| 39S ribosomal protein L43, mitochondrial-like [Aedes aegypti] >gb|EAT45753.1| AAEL002993-PA [Aedes aegypti]
AAEL007414-RA	Up in Y1	XM_001658301.2	XP_001658351	protein FAM136A [Aedes aegypti]
AAEL014382-RA	Up in Y1	XM_001648588.3	XP_001648638	collectin-11 [Aedes aegypti] >gb|EAT33333.1| AAEL014382-PA [Aedes aegypti]
AAEL000902-RB	Up in Y1	XM_021855007.1	XP_001651636	organic cation transporter protein [Aedes aegypti] >ref|XP_021710699.1| organic cation transporter protein [Aedes aegypti] >gb|EAT48035.1| AAEL000902-PA [Aedes aegypti]
AAEL021474-RA	Up in Y1	XM_021856599.1	XP_001658462	LOW QUALITY PROTEIN: protein arginine N-methyltransferase 5 [Aedes aegypti] >ref|XP_021712291.1| protein arginine N-methyltransferase 5-like [Aedes aegypti] >gb|EAT40711.1| AAEL007578-PA [Aedes aegypti]
AAEL019862-RA	Up in Y1	XM_021841555.1	XP_021697247	uncharacterized protein LOC5577573 isoform X1 [Aedes aegypti]
AAEL013844-RB	Up in Y1	XM_021839041.1	XP_021694733	acyl-CoA-binding protein [Aedes aegypti]
AAEL010109-RC	Up in Y1	XM_021840505.1	EAT37960	AAEL010109-PA [Aedes aegypti]
AAEL007404-RB	Up in Y1	XM_021848506.1	XP_021704193	homeobox protein 5 isoform X2 [Aedes aegypti]
AAEL026788-RA	Up in Y1	XM_021855595.1	XP_021711287	uncharacterized protein LOC110679832 [Aedes aegypti]
AAEL010596-RA	Up in Y1	XM_001654622.2	XP_001654672	polypeptide N-acetylgalactosaminyltransferase 16 [Aedes aegypti] >ref|XP_021693954.1| polypeptide N-acetylgalactosaminyltransferase 16 [Aedes aegypti]
AAEL012395-RA	Up in Y1	XM_001662479.2	XP_001662529	multidrug resistance-associated protein 4 [Aedes aegypti] >ref|XP_021693721.1| multidrug resistance-associated protein 4 [Aedes aegypti] >gb|EAT35434.1| AAEL012395-PA [Aedes aegypti]
AAEL009703-RB	Up in Y1	XM_021849847.1	XP_021705539	tetratricopeptide repeat protein 1 isoform X1 [Aedes aegypti]
AAEL011624-RB	Up in Y1	XM_021847631.1	XP_021703323	serine protease snake isoform X1 [Aedes aegypti]
AAEL000660-RA	Up in Y1	XM_001649748.2	XP_001649798	peptide methionine sulfoxide reductase [Aedes aegypti] >gb|EAT48309.1| AAEL000660-PA [Aedes aegypti]
AAEL009671-RA	Up in Y1	XM_001653875.2	XP_001653925	U6 snRNA-associated Sm-like protein LSm3 [Aedes aegypti] >gb|EAT38434.1| AAEL009671-PA [Aedes aegypti]
AAEL012646-RA	Up in Y1	XM_001662723.2	XP_001662773	uncharacterized protein LOC5576619 [Aedes aegypti] >gb|EAT35168.1| AAEL012646-PA [Aedes aegypti]
AAEL002012-RC	Up in Y1	XM_021847576.1	XP_021703268	phosphorylated adapter RNA export protein isoform X1 [Aedes aegypti]
AAEL011578-RA	Up in Y1	XM_001661708.2	XP_001661758	serine/threonine-protein kinase OSR1 [Aedes aegypti] >ref|XP_021711790.1| serine/threonine-protein kinase OSR1-like [Aedes aegypti] >gb|EAT36321.1| AAEL011578-PA [Aedes aegypti]
AAEL011538-RA	Up in Y1	XM_001661681.2	XP_001661731	mitochondrial ribonuclease P protein 1 homolog [Aedes aegypti] >gb|EAT32621.1| AAEL015198-PA [Aedes aegypti]
AAEL005877-RD	Up in Y1	XM_021856562.1	XP_021712254	activator of 90 kDa heat shock protein ATPase homolog 1-like [Aedes aegypti] >ref|XP_021712255.1| activator of 90 kDa heat shock protein ATPase homolog 1-like [Aedes aegypti] >gb|EAT42609.1| AAEL005877-PA [Aedes aegypti] >gb|EAT42610.1| AAEL005877-PC [Aedes aegypti] >gb|EAT42611.1| AAEL005877-PB [Aedes aegypti]
AAEL003433-RB	Up in Y1	XM_021853643.1	XP_021709335	copper-transporting ATPase 1 isoform X1 [Aedes aegypti]
AAEL002194-RA	Up in Y1	XM_001654880.2	XP_001654930	uricase [Aedes aegypti] >gb|ABV44610.1| urate oxidase [Aedes aegypti] >gb|EAT46590.1| AAEL002194-PA [Aedes aegypti] >gb|EAT46591.1| AAEL002194-PB [Aedes aegypti]
AAEL010473-RA	Up in Y1	XM_001660814.2	XP_001660864	uncharacterized protein LOC5573375 isoform X1 [Aedes aegypti]
AAEL022067-RA	Up in Y1	XM_021857225.1	XP_001652914	regulator of chromosome condensation [Aedes aegypti] >ref|XP_011493398.1| regulator of chromosome condensation [Aedes aegypti] >ref|XP_021712917.1| regulator of chromosome condensation-like [Aedes aegypti] >ref|XP_021712918.1| regulator of chromosome condensation-like [Aedes aegypti] >gb|EAT40461.1| AAEL007799-PA [Aedes aegypti] >gb|EJY57703.1| AAEL007799-PB [Aedes aegypti]
AAEL012014-RA	Up in Y1	XM_001662100.2	XP_001662150	L-lactate dehydrogenase [Aedes aegypti] >gb|EAT35843.1| AAEL012014-PA [Aedes aegypti]
AAEL020706-RA	Up in Y1	XM_001655654.2	XP_001655704	serine protease 55 [Aedes aegypti]
AAEL020299-RA	Up in Y1	XM_021846073.1	XP_021701765	roundabout homolog 1 [Aedes aegypti]
AAEL005342-RA	Up in Y1	XM_021854892.1	XP_021710584	protein ABHD18 [Aedes aegypti]
AAEL023729-RA	Up in Y1	XM_021852277.1	XP_021707969	trypsin 5G1-like [Aedes aegypti]
AAEL000859-RA	Up in Y1	XM_001651573.2	XP_001651623	surface antigen CRP170 [Aedes aegypti]
AAEL027016-RA	Up in Y1	XM_021856069.1	XP_021699606	UDP-glucuronosyltransferase 2B15-like [Aedes aegypti] >ref|XP_021711761.1| UDP-glucuronosyltransferase 2B15 [Aedes aegypti]
AAEL000566-RA	Up in Y1	XM_021852255.1	XP_021707947	uncharacterized protein LOC5564310 [Aedes aegypti]
AAEL006870-RG	Up in Y1	XM_021850671.1	XP_001652281	sorting nexin-17 [Aedes aegypti] >ref|XP_021706358.1| sorting nexin-17 [Aedes aegypti] >ref|XP_021706359.1| sorting nexin-17 [Aedes aegypti] >ref|XP_021706360.1| sorting nexin-17 [Aedes aegypti] >ref|XP_021706361.1| sorting nexin-17 [Aedes aegypti] >ref|XP_021706362.1| sorting nexin-17 [Aedes aegypti] >ref|XP_021706363.1| sorting nexin-17 [Aedes aegypti] >gb|EAT41496.1| AAEL006870-PA [Aedes aegyp…
AAEL026025-RA	Up in Y1	XM_001663726.2	XP_001663776	protein G12 [Aedes aegypti] >ref|XP_021701761.1| protein G12 [Aedes aegypti] >ref|XP_021701762.1| protein G12-like [Aedes aegypti] >ref|XP_021712126.1| protein G12-like [Aedes aegypti] >gb|AAL05408.1| microvilli membrane protein [Aedes aegypti] >gb|EAT34153.1| AAEL013577-PC [Aedes aegypti] >gb|EAT34155.1| AAEL013577-PB [Aedes aegypti] >gb|EAT37592.1| AAEL010431-PA [Aedes aegypti]
AAEL013715-RA	Up in Y1	XM_001663848.2	XP_001663898	trypsin 5G1-like [Aedes aegypti]
AAEL006932-RC	Up in Y1	XM_021850496.1	XP_021706188	transcription factor AP-2-epsilon isoform X2 [Aedes aegypti] >ref|XP_021706189.1| transcription factor AP-2-epsilon isoform X2 [Aedes aegypti]
AAEL022336-RA	Up in Y1	XR_002499257.1	XP_001851379	60S ribosomal protein L7 [Culex quinquefasciatus] >gb|EDS33449.1| 60S ribosomal protein L7 [Culex quinquefasciatus]
AAEL010202-RA	Up in Y1	XM_001660626.2	XP_001660676	trypsin 5G1-like [Aedes aegypti] >gb|ACV07666.1| serine protease VII [Aedes aegypti] >gb|EAT34028.1| AAEL013713-PA [Aedes aegypti]
AAEL020233-RD	Up in Y1	XM_021842701.1	XP_021698385	protein N-terminal glutamine amidohydrolase [Aedes aegypti] >ref|XP_021698386.1| protein N-terminal glutamine amidohydrolase [Aedes aegypti] >ref|XP_021698387.1| protein N-terminal glutamine amidohydrolase [Aedes aegypti] >ref|XP_021698388.1| protein N-terminal glutamine amidohydrolase [Aedes aegypti] >ref|XP_021698389.1| protein N-terminal glutamine amidohydrolase [Aedes aegypti] >ref|XP_0216983…
AAEL008838-RB	Up in Y1	XM_021844568.1	XP_021700260	zinc finger protein 214 [Aedes aegypti] >ref|XP_021700261.1| zinc finger protein 214 [Aedes aegypti]
AAEL026981-RA	Up in Y1	XM_001663726.2	XP_001663776	protein G12 [Aedes aegypti] >ref|XP_021701761.1| protein G12 [Aedes aegypti] >ref|XP_021701762.1| protein G12-like [Aedes aegypti] >ref|XP_021712126.1| protein G12-like [Aedes aegypti] >gb|AAL05408.1| microvilli membrane protein [Aedes aegypti] >gb|EAT34153.1| AAEL013577-PC [Aedes aegypti] >gb|EAT34155.1| AAEL013577-PB [Aedes aegypti] >gb|EAT37592.1| AAEL010431-PA [Aedes aegypti]
AAEL009438-RA	Up in Y1	XM_001660004.2	XP_001660054	ATP-dependent DNA helicase DDX11 [Aedes aegypti] >gb|EAT38683.1| AAEL009438-PA [Aedes aegypti]
AAEL010243-RB	Up in Y1	XM_021847160.1	XP_021702850	anoctamin-10 [Aedes aegypti] >ref|XP_021702851.1| anoctamin-10 [Aedes aegypti] >ref|XP_021702852.1| anoctamin-10 [Aedes aegypti] >ref|XP_021702853.1| anoctamin-10 [Aedes aegypti] >ref|XP_021702854.1| anoctamin-10 [Aedes aegypti]
AAEL009660-RC	Up in Y1	XM_021850587.1	XP_021706279	serine/arginine repetitive matrix protein 2 isoform X3 [Aedes aegypti]
AAEL012072-RB	Up in Y1	XM_001662186.2	RXG60188	histone H3 [Armadillidium vulgare]
AAEL015073-RB	Up in Y1	XM_021846195.1	XP_021701887	T-box protein H15 [Aedes aegypti]
AAEL008370-RA	Up in Y1	XM_001653175.3	XP_001653225	protein peste [Aedes aegypti] >ref|XP_021709728.1| protein peste [Aedes aegypti] >ref|XP_021709729.1| protein peste [Aedes aegypti] >ref|XP_021709730.1| protein peste [Aedes aegypti] >ref|XP_021709732.1| protein peste [Aedes aegypti] >ref|XP_021709733.1| protein peste [Aedes aegypti] >ref|XP_021709734.1| protein peste [Aedes aegypti]
AAEL014972-RE	Up in Y1	XM_021842671.1	XP_021698361	facilitated trehalose transporter Tret1 [Aedes aegypti] >ref|XP_021698362.1| facilitated trehalose transporter Tret1 [Aedes aegypti] >ref|XP_021698363.1| facilitated trehalose transporter Tret1 [Aedes aegypti] >ref|XP_021698364.1| facilitated trehalose transporter Tret1 [Aedes aegypti] >ref|XP_021698365.1| facilitated trehalose transporter Tret1 [Aedes aegypti] >ref|XP_029722402.1| facilitated tr…
AAEL024906-RA	Up in Y1	XM_021850553.1	XP_021706245	F-box/LRR-repeat protein 2-like [Aedes aegypti]
AAEL009166-RA	Up in Y1	XM_001656328.2	XP_001656378	protein G12 isoform X1 [Aedes aegypti] >ref|XP_001659784.2| protein G12 isoform X1 [Aedes aegypti] >gb|EAT34669.1| AAEL013127-PB [Aedes aegypti]
AAEL005200-RD	Up in Y1	XM_021839738.1	XP_001650480	venom carboxylesterase-6 [Aedes aegypti] >ref|XP_021695430.1| venom carboxylesterase-6 [Aedes aegypti] >ref|XP_021695431.1| venom carboxylesterase-6 [Aedes aegypti] >ref|XP_021695432.1| venom carboxylesterase-6 [Aedes aegypti]
AAEL004710-RH	Up in Y1	XM_021846814.1	XP_001649662	phosphatidylcholine:ceramide cholinephosphotransferase 1 isoform X3 [Aedes aegypti] >ref|XP_021702501.1| phosphatidylcholine:ceramide cholinephosphotransferase 1 isoform X3 [Aedes aegypti] >ref|XP_021702502.1| phosphatidylcholine:ceramide cholinephosphotransferase 1 isoform X3 [Aedes aegypti] >ref|XP_021702504.1| phosphatidylcholine:ceramide cholinephosphotransferase 1 isoform X3 [Aedes aegypti] …
AAEL003857-RA	Up in Y1	XM_001657239.3	XP_001657293	defensin-A [Aedes aegypti] >ref|XP_021712238.1| defensin-A [Aedes aegypti]
AAEL013102-RB	Up in Y1	XM_021853826.1	XP_021709519	uncharacterized protein LOC5577203 isoform X6 [Aedes aegypti]
AAEL026502-RA	Up in Y1	XR_002499786.1	EAT41667	AAEL006716-PA [Aedes aegypti]
AAEL026069-RB	Up in Y1	XM_021842570.1	XP_021698262	acetyl-CoA carboxylase isoform X4 [Aedes aegypti] >ref|XP_021698263.1| acetyl-CoA carboxylase isoform X4 [Aedes aegypti]
AAEL009088-RH	Up in Y1	XM_021839774.1	XP_021695461	epsin-1 isoform X1 [Aedes aegypti] >ref|XP_021695462.1| epsin-1 isoform X1 [Aedes aegypti] >ref|XP_021695463.1| epsin-1 isoform X1 [Aedes aegypti] >ref|XP_021695464.1| epsin-1 isoform X1 [Aedes aegypti] >ref|XP_021695465.1| epsin-1 isoform X1 [Aedes aegypti] >ref|XP_021695466.1| epsin-1 isoform X2 [Aedes aegypti] >ref|XP_021695467.1| epsin-1 isoform X1 [Aedes aegypti] >ref|XP_021695468.1| epsin-1…
AAEL013712-RA	Up in Y1	XM_001663845.2	EAT34030	AAEL013706-PA [Aedes aegypti]
AAEL003318-RA	Up in Y1	XM_001663496.2	XP_001663546	peptide transporter family 1 [Aedes aegypti]
AAEL007601-RA	Up in Y1	XM_001658441.2	XP_001658491	trypsin 5G1-like [Aedes aegypti]
AAEL004083-RJ	Up in Y1	XM_021855604.1	XP_021711288	echinoderm microtubule-associated protein-like 2 isoform X1 [Aedes aegypti] >ref|XP_021711289.1| echinoderm microtubule-associated protein-like 2 isoform X1 [Aedes aegypti] >ref|XP_021711290.1| echinoderm microtubule-associated protein-like 2 isoform X1 [Aedes aegypti] >ref|XP_021711291.1| echinoderm microtubule-associated protein-like 2 isoform X1 [Aedes aegypti] >ref|XP_021711292.1| echinoderm …
AAEL001696-RB	Up in Y1	XM_021841460.1	XP_021697153	retinal homeobox protein Rax isoform X2 [Aedes aegypti]
AAEL008078-RK	Up in Y1	XM_021837620.1	XP_021693312	uncharacterized protein LOC5570105 isoform X4 [Aedes aegypti]
AAEL010196-RA	Up in Y1	XM_001660623.2	XP_001660673	trypsin 5G1-like [Aedes aegypti] >gb|ACV07665.1| serine protease VI [Aedes aegypti]
AAEL019408-RA	Up in Y1	XM_001648402.3	XP_001648452	peroxiredoxin 1 [Aedes aegypti] >gb|AAL37254.1| 2-Cys thioredoxin peroxidase [Aedes aegypti]
AAEL008389-RE	Up in Y1	XM_021848566.1	XP_021704258	kinase D-interacting substrate of 220 kDa isoform X9 [Aedes aegypti] >ref|XP_021704259.1| kinase D-interacting substrate of 220 kDa isoform X9 [Aedes aegypti] >ref|XP_021704260.1| kinase D-interacting substrate of 220 kDa isoform X9 [Aedes aegypti]
AAEL015156-RA	Up in Y1	XM_001650755.2	XP_001650805	uncharacterized protein LOC5566413 [Aedes aegypti] >gb|EAT32637.1| AAEL015156-PA [Aedes aegypti]
AAEL009166-RB	Up in Y1	XM_021846072.1	XP_021701764	protein G12 isoform X2 [Aedes aegypti] >ref|XP_021712858.1| protein G12 isoform X2 [Aedes aegypti]
AAEL025386-RA	Up in Y1	XR_002498688.1	not available	not available
AAEL019799-RB	Up in Y1	XM_021850567.1	XP_021706263	muscle LIM protein 1 isoform X2 [Aedes aegypti] >ref|XP_021706264.1| muscle LIM protein 1 isoform X2 [Aedes aegypti] >ref|XP_021706265.1| muscle LIM protein 1 isoform X2 [Aedes aegypti] >ref|XP_021706266.1| muscle LIM protein 1 isoform X2 [Aedes aegypti]
AAEL003611-RA	Up in Y1	XM_001657031.2	XP_001657081	acyl-CoA Delta(11) desaturase [Aedes aegypti] >ref|XP_021711121.1| acyl-CoA Delta(11) desaturase [Aedes aegypti]
AAEL024811-RA	Up in Y1	XR_002498580.1	XP_038104100	uncharacterized protein LOC119765065 [Culex quinquefasciatus]
AAEL008510-RB	Up in Y1	XM_021841680.1	XP_021697372	sphingosine kinase 2 [Aedes aegypti] >ref|XP_021697373.1| sphingosine kinase 2 [Aedes aegypti] >ref|XP_021697374.1| sphingosine kinase 2 [Aedes aegypti] >ref|XP_021697375.1| sphingosine kinase 2 [Aedes aegypti] >ref|XP_021697376.1| sphingosine kinase 2 [Aedes aegypti] >ref|XP_021697377.1| sphingosine kinase 2 [Aedes aegypti] >gb|EAT39700.1| AAEL008510-PA [Aedes aegypti] >gb|EAT44350.1| AAEL004285…
AAEL024236-RG	Up in Y1	XM_021838426.1	XP_021694121	DNA-binding protein RFX2 isoform X8 [Aedes aegypti]
AAEL003739-RC	Up in Y1	XM_021843601.1	XP_021699293	coiled-coil domain-containing protein 102A isoform X2 [Aedes aegypti]

## Sheet: N1Y7
Gene	Expression	Nucleotide	Protein	Description
AAEL001796-RC	Up in N1	XM_021846772.1	XP_001660403	nuclear hormone receptor HR78 isoform X1 [Aedes aegypti] >ref|XP_021702464.1| nuclear hormone receptor HR78 isoform X1 [Aedes aegypti] >gb|EAT47063.1| AAEL001796-PA [Aedes aegypti]
AAEL008262-RB	Up in N1	XM_021844489.1	XP_021700181	F-box/LRR-repeat protein 14 [Aedes aegypti]
AAEL009861-RD	Up in N1	XM_001654015.2	XP_001654065	uncharacterized protein LOC5572533 isoform X1 [Aedes aegypti] >gb|EAT38230.1| AAEL009861-PD [Aedes aegypti] >gb|EAT38231.1| AAEL009861-PB [Aedes aegypti] >gb|EAT38232.1| AAEL009861-PA [Aedes aegypti]
AAEL007120-RD	Up in N1	XM_021847278.1	XP_021702970	LIM/homeobox protein Lhx3 isoform X3 [Aedes aegypti]
AAEL004193-RD	Up in N1	XM_021839009.1	XP_021694700	rhophilin-2 isoform X1 [Aedes aegypti] >ref|XP_021694701.1| rhophilin-2 isoform X1 [Aedes aegypti] >ref|XP_021694702.1| rhophilin-2 isoform X1 [Aedes aegypti] >ref|XP_021694703.1| rhophilin-2 isoform X1 [Aedes aegypti] >ref|XP_021694704.1| rhophilin-2 isoform X1 [Aedes aegypti]
AAEL028092-RB	Up in N1	XM_021837385.1	XP_021693077	fibroblast growth factor receptor homolog 1 isoform X1 [Aedes aegypti]
AAEL003605-RA	Up in N1	XM_021839190.1	XP_001657046	splicing factor 3B subunit 1 isoform X1 [Aedes aegypti] >gb|EAT45112.1| AAEL003605-PA [Aedes aegypti]
AAEL022715-RA	Up in N1	XR_002501746.1	EAT43395	AAEL005154-PA [Aedes aegypti]
AAEL009666-RC	Up in N1	XM_021851534.1	XP_021707226	histone-lysine N-methyltransferase ash1 isoform X1 [Aedes aegypti]
AAEL000678-RA	Up in N1	XM_001649733.2	XP_001649783	maltase 1 [Aedes aegypti] >gb|EAT48294.1| AAEL000678-PA [Aedes aegypti]
AAEL025619-RA	Up in N1	XR_002501916.1	KXJ75837	hypothetical protein RP20_CCG010946 [Aedes albopictus]
AAEL004743-RN	Up in N1	XM_021845308.1	XP_021701000	multidrug resistance-associated protein 1 isoform X6 [Aedes aegypti]
AAEL008190-RA	Up in N1	XM_001658967.2	XP_001659017	protein atonal homolog 8 [Aedes aegypti] >gb|EAT40047.1| AAEL008190-PA [Aedes aegypti]
AAEL010778-RE	Up in N1	XM_001654826.2	XP_001654876	protein rolling stone [Aedes aegypti] >ref|XP_021701284.1| protein rolling stone [Aedes aegypti] >ref|XP_021701285.1| protein rolling stone [Aedes aegypti] >ref|XP_021701286.1| protein rolling stone [Aedes aegypti] >ref|XP_021701287.1| protein rolling stone [Aedes aegypti] >gb|EAT37204.1| AAEL010778-PB [Aedes aegypti] >gb|EAT37205.1| AAEL010778-PA [Aedes aegypti]
AAEL024696-RB	Up in N1	XM_021856394.1	XP_011493585	sorbitol dehydrogenase [Aedes aegypti] >ref|XP_021706635.1| sorbitol dehydrogenase [Aedes aegypti] >ref|XP_021706636.1| sorbitol dehydrogenase [Aedes aegypti] >ref|XP_021706637.1| sorbitol dehydrogenase [Aedes aegypti] >ref|XP_021706638.1| sorbitol dehydrogenase [Aedes aegypti] >ref|XP_021712085.1| sorbitol dehydrogenase-like [Aedes aegypti] >ref|XP_021712086.1| sorbitol dehydrogenase-like [Aedes…
AAEL027589-RB	Up in N1	XM_021846319.1	XP_021702011	tudor domain-containing protein 1 isoform X1 [Aedes aegypti]
AAEL007990-RF	Up in N1	XM_021840558.1	XP_021696250	protein starmaker isoform X1 [Aedes aegypti]
AAEL007189-RB	Up in N1	XM_021845784.1	XP_021701475	nocturnin isoform X3 [Aedes aegypti] >ref|XP_021701476.1| nocturnin isoform X3 [Aedes aegypti]
AAEL021303-RA	Up in N1	XM_021838192.1	XP_021693884	transcription factor grauzone isoform X1 [Aedes aegypti]
AAEL020399-RA	Up in N1	XR_002501714.1	not available	not available
AAEL009387-RF	Up in N1	XM_021851194.1	XP_021706886	hexokinase type 2 isoform X6 [Aedes aegypti]
AAEL022183-RB	Up in N1	XM_021854903.1	XP_001657412	endoplasmic reticulum mannosyl-oligosaccharide 1,2-alpha-mannosidase [Aedes aegypti] >ref|XP_021710588.1| endoplasmic reticulum mannosyl-oligosaccharide 1,2-alpha-mannosidase [Aedes aegypti] >ref|XP_021710595.1| endoplasmic reticulum mannosyl-oligosaccharide 1,2-alpha-mannosidase [Aedes aegypti]
AAEL003075-RB	Up in N1	XM_021843908.1	XP_021699600	zinc finger and BTB domain-containing protein 14 isoform X1 [Aedes aegypti]
AAEL006711-RG	Up in N1	XM_021853087.1	XP_021708752	BCL2/adenovirus E1B 19 kDa protein-interacting protein 3 isoform X1 [Aedes aegypti] >ref|XP_021708760.1| BCL2/adenovirus E1B 19 kDa protein-interacting protein 3 isoform X1 [Aedes aegypti] >ref|XP_021708762.1| BCL2/adenovirus E1B 19 kDa protein-interacting protein 3 isoform X1 [Aedes aegypti] >ref|XP_021708768.1| BCL2/adenovirus E1B 19 kDa protein-interacting protein 3 isoform X1 [Aedes aegypti] …
AAEL019656-RC	Up in N1	XM_021839465.1	XP_021695155	AMP deaminase 2 isoform X3 [Aedes aegypti] >ref|XP_021695156.1| AMP deaminase 2 isoform X3 [Aedes aegypti] >ref|XP_021695157.1| AMP deaminase 2 isoform X3 [Aedes aegypti] >ref|XP_021695158.1| AMP deaminase 2 isoform X3 [Aedes aegypti]
AAEL022720-RC	Up in N1	XM_021842792.1	XP_021698484	uncharacterized transmembrane protein DDB_G0289901-like isoform X3 [Aedes aegypti]
AAEL011918-RK	Up in N1	XM_021852862.1	XP_021708554	uncharacterized protein LOC5580214 isoform X1 [Aedes aegypti] >ref|XP_021708555.1| uncharacterized protein LOC5580214 isoform X1 [Aedes aegypti]
AAEL019733-RA	Up in N1	XM_021839305.1	XP_021694995	uncharacterized protein LOC5573415 isoform X1 [Aedes aegypti]
AAEL012062-RI	Up in N1	XM_021837809.1	XP_029733758	sodium/potassium-transporting ATPase subunit alpha isoform X4 [Aedes albopictus]
AAEL006276-RA	Up in N1	XM_001651800.2	XP_001651850	protein-glucosylgalactosylhydroxylysine glucosidase [Aedes aegypti]
AAEL009184-RC	Up in N1	XM_001653665.2	XP_021697307	uncharacterized protein LOC5571601 isoform X1 [Aedes aegypti]
AAEL001434-RF	Up in N1	XM_021840742.1	XP_021696433	coronin-1C isoform X3 [Aedes aegypti]
AAEL023384-RA	Up in N1	XM_021850089.1	XP_021705781	mucin-5AC isoform X3 [Aedes aegypti]
AAEL019619-RA	Up in N1	XM_021852790.1	XP_021708482	mucin-3A isoform X1 [Aedes aegypti]
AAEL013078-RC	Up in N1	XM_021839327.1	XP_021695017	probable Dol-P-Man:Man(7)GlcNAc(2)-PP-Dol alpha-1,6-mannosyltransferase [Aedes aegypti] >ref|XP_021695018.1| probable Dol-P-Man:Man(7)GlcNAc(2)-PP-Dol alpha-1,6-mannosyltransferase [Aedes aegypti] >ref|XP_021695019.1| probable Dol-P-Man:Man(7)GlcNAc(2)-PP-Dol alpha-1,6-mannosyltransferase [Aedes aegypti] >ref|XP_021695020.1| probable Dol-P-Man:Man(7)GlcNAc(2)-PP-Dol alpha-1,6-mannosyltransferase …
AAEL019513-RH	Up in N1	XM_021837816.1	XP_021693504	sodium/calcium exchanger 1 isoform X1 [Aedes aegypti] >ref|XP_021693505.1| sodium/calcium exchanger 1 isoform X1 [Aedes aegypti] >ref|XP_021693506.1| sodium/calcium exchanger 1 isoform X1 [Aedes aegypti] >ref|XP_021693507.1| sodium/calcium exchanger 1 isoform X1 [Aedes aegypti] >ref|XP_021693508.1| sodium/calcium exchanger 1 isoform X1 [Aedes aegypti] >ref|XP_021693509.1| sodium/calcium exchanger…
AAEL013159-RB	Up in N1	XM_021850183.1	XP_021705874	insulin-like growth factor-binding protein complex acid labile subunit [Aedes aegypti] >ref|XP_021705875.1| insulin-like growth factor-binding protein complex acid labile subunit [Aedes aegypti]
AAEL008267-RC	Up in N1	XM_021856932.1	XP_021712624	neuropeptide FF receptor 2-like isoform X1 [Aedes aegypti] >gb|QBC65437.1| neuropeptide FF receptor [Aedes aegypti]
AAEL020973-RA	Up in N1	XR_002500850.1	not available	not available
AAEL013756-RD	Up in N1	XM_021849783.1	XP_021705473	zinc transporter ZIP1 isoform X1 [Aedes aegypti] >ref|XP_021705474.1| zinc transporter ZIP1 isoform X1 [Aedes aegypti] >ref|XP_021705475.1| zinc transporter ZIP1 isoform X1 [Aedes aegypti] >ref|XP_021705476.1| zinc transporter ZIP1 isoform X1 [Aedes aegypti] >ref|XP_021705477.1| zinc transporter ZIP1 isoform X1 [Aedes aegypti] >ref|XP_021705478.1| zinc transporter ZIP1 isoform X1 [Aedes aegypti]
AAEL009171-RA	Up in N1	XM_001659741.2	XP_001659791	protein CREBRF homolog isoform X2 [Aedes aegypti] >gb|EAT38994.1| AAEL009171-PA [Aedes aegypti]
AAEL022651-RA	Up in N1	XM_021856676.1	XP_021712368	puromycin-sensitive aminopeptidase-like protein [Aedes aegypti]
AAEL023510-RA	Up in N1	XR_002500465.1	EAT46141	AAEL002646-PA [Aedes aegypti]
AAEL008514-RD	Up in N1	XM_021841668.1	XP_001659332	ubiquitin-conjugating enzyme E2 W isoform X1 [Aedes aegypti] >ref|XP_021697358.1| ubiquitin-conjugating enzyme E2 W isoform X1 [Aedes aegypti] >ref|XP_021697359.1| ubiquitin-conjugating enzyme E2 W isoform X1 [Aedes aegypti] >ref|XP_021697360.1| ubiquitin-conjugating enzyme E2 W isoform X1 [Aedes aegypti] >gb|EAT39708.1| AAEL008514-PA [Aedes aegypti]
AAEL025065-RF	Up in N1	XM_021840942.1	XP_021696636	serine/arginine repetitive matrix protein 5 isoform X6 [Aedes aegypti]
AAEL024936-RC	Up in N1	XM_021843301.1	XP_021698992	protein disabled isoform X2 [Aedes aegypti]
AAEL004212-RA	Up in N1	XM_001648643.2	XP_038120498	leucine-rich repeat-containing protein 20 isoform X1 [Culex quinquefasciatus]
AAEL004415-RD	Up in N1	XM_021851900.1	XP_021707590	poly(U)-binding-splicing factor half pint isoform X2 [Aedes aegypti] >ref|XP_021707591.1| poly(U)-binding-splicing factor half pint isoform X2 [Aedes aegypti] >ref|XP_021707592.1| poly(U)-binding-splicing factor half pint isoform X2 [Aedes aegypti] >ref|XP_021707593.1| poly(U)-binding-splicing factor half pint isoform X2 [Aedes aegypti]
AAEL013770-RB	Up in N1	XM_021842086.1	XP_021697776	PR domain zinc finger protein 1 isoform X1 [Aedes aegypti]
AAEL026791-RC	Up in N1	XM_021840951.1	EAT41854	AAEL006544-PA [Aedes aegypti]
AAEL001473-RE	Up in N1	XM_021844908.1	XP_021700600	intersectin-1 isoform X2 [Aedes aegypti]
AAEL007658-RO	Up in N1	XM_021838991.1	XP_021694681	partitioning defective 3 homolog isoform X4 [Aedes aegypti] >ref|XP_021694682.1| partitioning defective 3 homolog isoform X4 [Aedes aegypti] >ref|XP_021694683.1| partitioning defective 3 homolog isoform X4 [Aedes aegypti] >ref|XP_021694684.1| partitioning defective 3 homolog isoform X4 [Aedes aegypti] >ref|XP_021694685.1| partitioning defective 3 homolog isoform X4 [Aedes aegypti] >ref|XP_0216946…
AAEL021812-RA	Up in N1	XM_021849158.1	EAT42254	AAEL006190-PA [Aedes aegypti]
AAEL013102-RH	Up in N1	XM_021853821.1	XP_021709510	uncharacterized protein LOC5577203 isoform X1 [Aedes aegypti] >ref|XP_021709511.1| uncharacterized protein LOC5577203 isoform X1 [Aedes aegypti] >ref|XP_021709513.1| uncharacterized protein LOC5577203 isoform X1 [Aedes aegypti] >ref|XP_021709514.1| uncharacterized protein LOC5577203 isoform X1 [Aedes aegypti]
AAEL008760-RA	Up in N1	XM_001659410.2	XP_001659460	transmembrane protein 164 [Aedes aegypti] >ref|XP_021710560.1| transmembrane protein 164 [Aedes aegypti] >ref|XP_021710561.1| transmembrane protein 164 [Aedes aegypti] >gb|EAT39439.1| AAEL008760-PA [Aedes aegypti]
AAEL019424-RT	Up in N1	XM_021838922.1	XP_021694614	protein lap4 isoform X3 [Aedes aegypti]
AAEL024613-RA	Up in N1	XR_002502028.1	EAT34550	AAEL013223-PA [Aedes aegypti]
AAEL027514-RB	Up in N1	XM_021853619.1	XP_021709311	uncharacterized protein LOC110679302 isoform X2 [Aedes aegypti]
AAEL003971-RA	Up in N1	XM_001648071.2	XP_001648121	uncharacterized protein LOC5579808 [Aedes aegypti]
AAEL003075-RA	Up in N1	XM_001663019.2	XP_021699601	zinc finger and BTB domain-containing protein 14 isoform X2 [Aedes aegypti]
AAEL012634-RB	Up in N1	XM_021840827.1	XP_021696519	chaoptin-like [Aedes aegypti]
AAEL023463-RA	Up in N1	XR_002500496.1	XP_021701051	uncharacterized protein LOC110676645 [Aedes aegypti]
AAEL004090-RC	Up in N1	XM_021855338.1	XP_021711030	protein SERAC1 isoform X3 [Aedes aegypti]
AAEL008069-RC	Up in N1	XM_021844340.1	XP_021700032	sushi, von Willebrand factor type A, EGF and pentraxin domain-containing protein 1 isoform X2 [Aedes aegypti]
AAEL023821-RA	Up in N1	XM_021838052.1	XP_021693744	uncharacterized protein LOC110674165 [Aedes aegypti]
AAEL000315-RB	Up in N1	XM_021846592.1	XP_021702284	protein pigeon isoform X2 [Aedes aegypti]
AAEL000840-RD	Up in N1	XM_021854623.1	XP_021710315	phosphatidylinositol 4,5-bisphosphate 5-phosphatase A isoform X3 [Aedes aegypti]
AAEL019512-RH	Up in N1	XM_021848683.1	XP_021704373	MAGUK p55 subfamily member 5-A isoform X4 [Aedes aegypti] >ref|XP_021704374.1| MAGUK p55 subfamily member 5-A isoform X4 [Aedes aegypti] >ref|XP_021704375.1| MAGUK p55 subfamily member 5-A isoform X4 [Aedes aegypti] >ref|XP_021704376.1| MAGUK p55 subfamily member 5-A isoform X4 [Aedes aegypti] >ref|XP_021704377.1| MAGUK p55 subfamily member 5-A isoform X4 [Aedes aegypti] >ref|XP_021704378.1| MAGU…
AAEL006454-RA	Up in N1	XM_001657780.2	XP_001657830	general odorant-binding protein lush [Aedes aegypti] >gb|EAT41942.1| AAEL006454-PA [Aedes aegypti]
AAEL010464-RD	Up in N1	XM_021857300.1	XP_001660861	glutamate dehydrogenase, mitochondrial isoform X2 [Aedes aegypti] >ref|XP_021712992.1| glutamate dehydrogenase, mitochondrial isoform X2 [Aedes aegypti] >gb|AAV31914.1| glutamate dehydrogenase [Aedes aegypti] >gb|EAT37557.1| AAEL010464-PA [Aedes aegypti] >gb|EAT37559.1| AAEL010464-PC [Aedes aegypti]
AAEL009507-RD	Up in N1	XM_021849017.1	EAT38627	AAEL009507-PA [Aedes aegypti]
AAEL012583-RE	Up in N1	XM_021838045.1	XP_021693737	probable Rho GTPase-activating protein CG5521 isoform X2 [Aedes aegypti]
AAEL011520-RA	Up in N1	XM_001661670.2	XP_021710502	proton-associated sugar transporter A isoform X1 [Aedes aegypti]
AAEL002998-RE	Up in N1	XM_021854752.1	XP_021710443	histone-lysine N-methyltransferase setd3 [Aedes aegypti] >ref|XP_021710444.1| histone-lysine N-methyltransferase setd3 [Aedes aegypti] >ref|XP_021710445.1| histone-lysine N-methyltransferase setd3 [Aedes aegypti] >ref|XP_021710446.1| histone-lysine N-methyltransferase setd3 [Aedes aegypti] >ref|XP_021710447.1| histone-lysine N-methyltransferase setd3 [Aedes aegypti] >ref|XP_021710448.1| histone-l…
AAEL003841-RA	Up in N1	XM_021856546.1	XP_001657293	defensin-A [Aedes aegypti] >ref|XP_021712238.1| defensin-A [Aedes aegypti]
AAEL020340-RB	Up in N1	XM_021837667.1	XP_021693359	probable serine/threonine-protein kinase DDB_G0282963 isoform X4 [Aedes aegypti]
AAEL012536-RD	Up in N1	XM_021841351.1	EAT35281	AAEL012536-PA [Aedes aegypti]
AAEL017498-RB	Up in N1	XM_021854137.1	XP_021709829	caspase-8 [Aedes aegypti]
AAEL027099-RD	Up in N1	XM_021838256.1	XP_021693948	collagen alpha chain CG42342 isoform X5 [Aedes aegypti]
AAEL004025-RH	Up in N1	XR_002502655.1	XP_039446512	glucose dehydrogenase [FAD, quinone]-like isoform X6 [Culex pipiens pallens]
AAEL019473-RI	Up in N1	XM_021850211.1	XP_021705903	serine/threonine-protein kinase par-1 isoform X5 [Aedes aegypti]
AAEL019461-RB	Up in N1	XM_021847386.1	XP_021703077	protein timeless isoform X1 [Aedes aegypti] >ref|XP_021703078.1| protein timeless isoform X1 [Aedes aegypti] >ref|XP_021703079.1| protein timeless isoform X1 [Aedes aegypti] >ref|XP_021703080.1| protein timeless isoform X1 [Aedes aegypti] >ref|XP_021703081.1| protein timeless isoform X1 [Aedes aegypti] >gb|EAT41999.1| AAEL006411-PB [Aedes aegypti]
AAEL011519-RA	Up in N1	XM_001661671.2	XP_001661721	solute carrier family 45 member 4 [Aedes aegypti]
AAEL002307-RA	Up in N1	XM_001661212.2	XP_001661262	leucine-rich repeat neuronal protein 3 isoform X2 [Aedes aegypti] >gb|EAT46547.1| AAEL002307-PA [Aedes aegypti]
AAEL009859-RA	Up in N1	XM_001654011.2	XP_001654061	nucleolar GTP-binding protein 1 [Aedes aegypti]
AAEL001902-RB	Up in N1	XM_021846989.1	XP_021702681	glutamate decarboxylase 1 isoform X2 [Aedes aegypti]
AAEL022793-RE	Up in N1	XM_021848342.1	XP_021704034	apoptosis-resistant E3 ubiquitin protein ligase 1 isoform X4 [Aedes aegypti] >ref|XP_021704035.1| apoptosis-resistant E3 ubiquitin protein ligase 1 isoform X4 [Aedes aegypti] >ref|XP_021704036.1| apoptosis-resistant E3 ubiquitin protein ligase 1 isoform X4 [Aedes aegypti] >ref|XP_021704037.1| apoptosis-resistant E3 ubiquitin protein ligase 1 isoform X4 [Aedes aegypti] >ref|XP_021704038.1| apoptos…
AAEL026119-RA	Up in N1	XR_002499555.1	not available	not available
AAEL014768-RC	Up in N1	XM_021841420.1	XP_021697112	glutamate synthase 1 [NADH], chloroplastic isoform X2 [Aedes aegypti]
AAEL003402-RG	Up in N1	XM_021855117.1	XP_021710809	sphingomyelin phosphodiesterase isoform X3 [Aedes aegypti] >ref|XP_021710810.1| sphingomyelin phosphodiesterase isoform X3 [Aedes aegypti]
AAEL019654-RH	Up in N1	XM_021855199.1	XP_021710886	IQ motif and SEC7 domain-containing protein 1 isoform X2 [Aedes aegypti] >ref|XP_021710887.1| IQ motif and SEC7 domain-containing protein 1 isoform X2 [Aedes aegypti] >ref|XP_021710888.1| IQ motif and SEC7 domain-containing protein 1 isoform X2 [Aedes aegypti] >ref|XP_021710889.1| IQ motif and SEC7 domain-containing protein 1 isoform X2 [Aedes aegypti] >ref|XP_021710891.1| IQ motif and SEC7 domai…
AAEL006667-RD	Up in N1	XM_021845907.1	XP_021701597	ethanolaminephosphotransferase 1 isoform X1 [Aedes aegypti] >ref|XP_021701598.1| ethanolaminephosphotransferase 1 isoform X1 [Aedes aegypti] >ref|XP_021701599.1| ethanolaminephosphotransferase 1 isoform X1 [Aedes aegypti] >ref|XP_021701600.1| ethanolaminephosphotransferase 1 isoform X1 [Aedes aegypti] >ref|XP_021701601.1| ethanolaminephosphotransferase 1 isoform X1 [Aedes aegypti] >ref|XP_0217016…
AAEL006886-RB	Up in N1	XM_021840292.1	EAT41477	AAEL006886-PA [Aedes aegypti]
AAEL001484-RD	Up in N1	XR_002500509.1	XP_001653392	exportin-1 [Aedes aegypti] >ref|XP_021700629.1| exportin-1 [Aedes aegypti] >gb|EAT47399.1| AAEL001484-PA [Aedes aegypti] >gb|EAT47400.1| AAEL001484-PB [Aedes aegypti]
AAEL011006-RG	Up in N1	XM_021853079.1	XP_021708766	guanylate kinase isoform X2 [Aedes aegypti]
AAEL014613-RA	Up in N1	XM_001649048.2	XP_001649098	probable cytochrome P450 9f2 [Aedes aegypti]
AAEL007934-RC	Up in N1	XM_021852392.1	XP_021708082	mitochondrial tRNA-specific 2-thiouridylase 1 [Aedes aegypti] >ref|XP_021708083.1| mitochondrial tRNA-specific 2-thiouridylase 1 [Aedes aegypti] >ref|XP_021708084.1| mitochondrial tRNA-specific 2-thiouridylase 1 [Aedes aegypti] >gb|EAT40320.1| AAEL007934-PA [Aedes aegypti]
AAEL027998-RB	Up in N1	XM_021855954.1	XP_021711646	mucin-5AC-like isoform X1 [Aedes aegypti]
AAEL005239-RA	Up in N1	XM_001650488.2	XP_001650538	growth hormone-regulated TBC protein 1-A [Aedes aegypti] >ref|XP_021711634.1| growth hormone-regulated TBC protein 1-A [Aedes aegypti] >ref|XP_021711635.1| growth hormone-regulated TBC protein 1-A [Aedes aegypti] >ref|XP_021711636.1| growth hormone-regulated TBC protein 1-A [Aedes aegypti] >ref|XP_021711637.1| growth hormone-regulated TBC protein 1-A [Aedes aegypti] >ref|XP_021711638.1| growth ho…
AAEL001356-RC	Up in N1	XR_002499604.1	XP_019548716	probable splicing factor, arginine/serine-rich 5 isoform X1 [Aedes albopictus] >ref|XP_029733589.1| probable splicing factor, arginine/serine-rich 5 isoform X1 [Aedes albopictus] >ref|XP_029733590.1| probable splicing factor, arginine/serine-rich 5 isoform X1 [Aedes albopictus]
AAEL003188-RA	Up in N1	XM_001656488.2	XP_001656538	sphingosine-1-phosphate lyase-like [Aedes aegypti] >ref|XP_021712583.1| sphingosine-1-phosphate lyase-like [Aedes aegypti] >ref|XP_021712584.1| sphingosine-1-phosphate lyase-like [Aedes aegypti] >ref|XP_021712586.1| sphingosine-1-phosphate lyase-like [Aedes aegypti]
AAEL007731-RC	Up in N1	XM_021841709.1	XP_001658605	syntaxin-7 [Aedes aegypti] >ref|XP_021697400.1| syntaxin-7 [Aedes aegypti] >ref|XP_021697401.1| syntaxin-7 [Aedes aegypti] >gb|EAT40546.1| AAEL007731-PA [Aedes aegypti]
AAEL003963-RB	Up in N1	XM_021850347.1	XP_001648122	calpain-B [Aedes aegypti] >ref|XP_021706039.1| calpain-B [Aedes aegypti]
AAEL021471-RA	Up in N1	XM_021838620.1	XP_021694312	type I inositol 3,4-bisphosphate 4-phosphatase isoform X2 [Aedes aegypti]
AAEL009171-RC	Up in N1	XM_021851753.1	XP_021707444	protein CREBRF homolog isoform X1 [Aedes aegypti] >ref|XP_021707445.1| protein CREBRF homolog isoform X1 [Aedes aegypti]
AAEL025488-RC	Up in N1	XM_021854549.1	XP_021710220	lateral signaling target protein 2 homolog isoform X1 [Aedes aegypti] >ref|XP_021710227.1| lateral signaling target protein 2 homolog isoform X1 [Aedes aegypti] >ref|XP_021710238.1| lateral signaling target protein 2 homolog isoform X1 [Aedes aegypti] >ref|XP_021710241.1| lateral signaling target protein 2 homolog isoform X1 [Aedes aegypti] >ref|XP_021712277.1| lateral signaling target protein 2 …
AAEL018241-RC	Up in N1	XM_001656070.2	XP_001656120	uncharacterized protein LOC5576417 [Aedes aegypti] >ref|XP_021696956.1| uncharacterized protein LOC5576417 [Aedes aegypti]
AAEL019668-RD	Up in N1	XM_021841140.1	XP_021696832	ribosomal protein S6 kinase alpha-5 [Aedes aegypti] >ref|XP_021696833.1| ribosomal protein S6 kinase alpha-5 [Aedes aegypti] >ref|XP_021696834.1| ribosomal protein S6 kinase alpha-5 [Aedes aegypti] >ref|XP_021696835.1| ribosomal protein S6 kinase alpha-5 [Aedes aegypti] >ref|XP_021696836.1| ribosomal protein S6 kinase alpha-5 [Aedes aegypti]
AAEL007364-RA	Up in N1	XM_001658269.2	XP_001658319	8-oxo-dGDP phosphatase NUDT18 [Aedes aegypti] >gb|EAT40954.1| AAEL007364-PA [Aedes aegypti]
AAEL011280-RC	Up in N1	XM_021844181.1	XP_021699873	muscle calcium channel subunit alpha-1 isoform X7 [Aedes aegypti]
AAEL001843-RF	Up in N1	XM_021845124.1	XP_021700811	ski oncogene isoform X1 [Aedes aegypti] >ref|XP_021700812.1| ski oncogene isoform X1 [Aedes aegypti] >ref|XP_021700813.1| ski oncogene isoform X1 [Aedes aegypti] >ref|XP_021700814.1| ski oncogene isoform X1 [Aedes aegypti] >ref|XP_021700815.1| ski oncogene isoform X1 [Aedes aegypti] >ref|XP_021700816.1| ski oncogene isoform X1 [Aedes aegypti]
AAEL012102-RA	Up in N1	XM_001655815.2	XP_001655865	gametogenetin-binding protein 2-like [Aedes aegypti] >ref|XP_021694431.1| gametogenetin-binding protein 2-like [Aedes aegypti] >gb|EAT35761.1| AAEL012102-PA [Aedes aegypti]
AAEL005955-RB	Up in N1	XM_021854141.1	XP_021709833	caspase-3 [Aedes aegypti]
AAEL019501-RD	Up in N1	XM_021852715.1	XP_021708406	A disintegrin and metalloproteinase with thrombospondin motifs 9 isoform X1 [Aedes aegypti] >ref|XP_021708407.1| A disintegrin and metalloproteinase with thrombospondin motifs 9 isoform X1 [Aedes aegypti]
AAEL019812-RA	Up in N1	XR_002502723.1	XP_021711059	uncharacterized protein LOC5564138 isoform X1 [Aedes aegypti]
AAEL009487-RA	Up in N1	XM_001660052.2	XP_001660102	uncharacterized protein LOC5571997 [Aedes aegypti]
AAEL009027-RB	Up in N1	XM_021841712.1	XP_001653641	mediator of RNA polymerase II transcription subunit 24 [Aedes aegypti] >ref|XP_021697404.1| mediator of RNA polymerase II transcription subunit 24 [Aedes aegypti] >sp|Q16X15.1| RecName: Full=Mediator of RNA polymerase II transcription subunit 24; AltName: Full=Mediator complex subunit 24 [Aedes aegypti] >gb|EAT39141.1| AAEL009027-PA [Aedes aegypti]
AAEL025469-RA	Up in N1	XM_021857027.1	XP_021712718	protein preli-like [Aedes aegypti] >ref|XP_021712719.1| protein preli-like [Aedes aegypti]
AAEL004239-RA	Up in N1	XM_001648697.2	XP_001648747	uncharacterized protein LOC5564398 [Aedes aegypti] >gb|EAT44393.1| AAEL004239-PA [Aedes aegypti]
AAEL008266-RC	Up in N1	XM_021856934.1	XP_021712626	uncharacterized protein LOC5570369 isoform X1 [Aedes aegypti]
AAEL011801-RA	Up in N1	XM_001661863.2	XP_001661913	uncharacterized protein LOC5575396 [Aedes aegypti] >gb|EAT36088.1| AAEL011801-PA [Aedes aegypti]
AAEL009567-RA	Up in N1	XM_001660183.2	XP_001660233	apolipoprotein D [Aedes aegypti]
AAEL018201-RA	Up in N1	XM_021848749.1	XP_021704441	zinc finger protein 420 isoform X2 [Aedes aegypti]
AAEL007910-RC	Up in N1	XM_021848393.1	XP_021704085	protein FAM151B isoform X1 [Aedes aegypti]
AAEL007560-RC	Up in N1	XM_021844762.1	XP_021700454	glycoprotein-N-acetylgalactosamine 3-beta-galactosyltransferase 1 isoform X3 [Aedes aegypti]
AAEL007780-RA	Up in N1	XM_001658610.2	XP_001658660	uncharacterized protein LOC5569630 [Aedes aegypti]
AAEL000399-RA	Up in N1	XM_001656023.2	XP_001656073	transmembrane protein 104 homolog [Aedes aegypti] >ref|XP_021712761.1| transmembrane protein 104 homolog [Aedes aegypti] >gb|EAT48593.1| AAEL000399-PA [Aedes aegypti]
AAEL013557-RB	Up in N1	XM_021840382.1	XP_001663743	zinc finger protein 37 homolog [Aedes aegypti] >ref|XP_021696074.1| zinc finger protein 37 homolog [Aedes aegypti]
AAEL023571-RA	Up in N1	XM_021838523.1	XP_021694215	LOW QUALITY PROTEIN: uncharacterized protein K02A2.6-like, partial [Aedes aegypti]
AAEL024913-RC	Up in N1	XM_021837371.1	EAT33931	AAEL013800-PA [Aedes aegypti]
AAEL019684-RA	Up in N1	XM_021838144.1	XP_021693836	uncharacterized protein LOC23687557 [Aedes aegypti]
AAEL013533-RB	Up in N1	XM_021844710.1	XP_021700401	ribosome biogenesis protein NSA2 homolog [Aedes aegypti] >ref|XP_021700402.1| ribosome biogenesis protein NSA2 homolog [Aedes aegypti] >ref|XP_021700403.1| ribosome biogenesis protein NSA2 homolog [Aedes aegypti] >gb|EAT34202.1| AAEL013533-PA [Aedes aegypti]
AAEL008056-RI	Up in N1	XM_021844342.1	XP_021700033	uncharacterized protein LOC5569977 isoform X1 [Aedes aegypti] >ref|XP_021700034.1| uncharacterized protein LOC5569977 isoform X1 [Aedes aegypti]
AAEL019854-RA	Up in N1	XM_021845084.1	XP_021700773	E3 ubiquitin-protein ligase MIB2 isoform X1 [Aedes aegypti] >ref|XP_021700774.1| E3 ubiquitin-protein ligase MIB2 isoform X1 [Aedes aegypti]
AAEL007450-RA	Up in N1	XM_021845374.1	XP_021701066	protein odd-skipped [Aedes aegypti]
AAEL019826-RB	Up in N1	XM_021846574.1	XP_021702265	leupaxin isoform X3 [Aedes aegypti] >ref|XP_021702266.1| leupaxin isoform X3 [Aedes aegypti] >ref|XP_021702267.1| leupaxin isoform X3 [Aedes aegypti] >ref|XP_021702268.1| leupaxin isoform X3 [Aedes aegypti]
AAEL022948-RB	Up in N1	XM_021849912.1	XP_021705604	adenylate cyclase type 8 [Aedes aegypti]
AAEL019580-RE	Up in N1	XM_021853384.1	XP_021709076	probable phospholipid-transporting ATPase IA isoform X10 [Aedes aegypti]
AAEL005237-RB	Up in N1	XM_001650473.2	XP_001650523	uncharacterized protein LOC5566175 [Aedes aegypti] >gb|ABM68593.1| AAEL005237-PA [Aedes aegypti] >gb|EAT43322.1| AAEL005237-PA [Aedes aegypti] >gb|EAT43478.1| AAEL005088-PA [Aedes aegypti]
AAEL014557-RB	Up in N1	XM_021845973.1	XP_021701665	homeotic protein caudal isoform X1 [Aedes aegypti]
AAEL006978-RD	Up in N1	XM_021847068.1	XP_001652440	annulin isoform X1 [Aedes aegypti] >ref|XP_021702758.1| annulin isoform X1 [Aedes aegypti] >ref|XP_021702759.1| annulin isoform X1 [Aedes aegypti] >ref|XP_021702760.1| annulin isoform X1 [Aedes aegypti] >ref|XP_021702761.1| annulin isoform X1 [Aedes aegypti] >ref|XP_021702762.1| annulin isoform X1 [Aedes aegypti] >ref|XP_021702763.1| annulin isoform X1 [Aedes aegypti] >ref|XP_021702764.1| annulin…
AAEL019679-RC	Up in N1	XM_021843192.1	XP_021698883	esterase B1 isoform X1 [Aedes aegypti]
AAEL005305-RH	Up in N1	XM_021851551.1	XP_021707240	dnaJ homolog subfamily B member 6 isoform X1 [Aedes aegypti] >ref|XP_021707241.1| dnaJ homolog subfamily B member 6 isoform X1 [Aedes aegypti] >ref|XP_021707242.1| dnaJ homolog subfamily B member 6 isoform X1 [Aedes aegypti] >ref|XP_021707243.1| dnaJ homolog subfamily B member 6 isoform X1 [Aedes aegypti]
AAEL017526-RC	Up in N1	XM_021843279.1	XP_021698971	serine/arginine repetitive matrix protein 1 isoform X2 [Aedes aegypti]
AAEL009265-RC	Up in N1	XM_021845042.1	XP_021700734	uncharacterized protein LOC5571731 isoform X1 [Aedes aegypti] >ref|XP_021700735.1| uncharacterized protein LOC5571731 isoform X1 [Aedes aegypti]
AAEL013402-RE	Up in N1	XM_021851542.1	XP_021707234	E3 ubiquitin-protein ligase Mdm2 isoform X2 [Aedes aegypti]
AAEL009253-RB	Up in N1	XM_021845048.1	XP_021700740	uncharacterized protein LOC5571739 isoform X1 [Aedes aegypti]
AAEL020330-RA	Up in N1	XM_021837962.1	XP_021693654	heat shock protein 70 A1-like [Aedes aegypti]
AAEL003347-RB	Up in N1	XM_021848191.1	XP_001656682	retinaldehyde-binding protein 1 isoform X1 [Aedes aegypti] >ref|XP_021703883.1| retinaldehyde-binding protein 1 isoform X1 [Aedes aegypti] >gb|EAT45364.1| AAEL003347-PA [Aedes aegypti]
AAEL025488-RA	Up in N1	XM_021854535.1	XP_021710220	lateral signaling target protein 2 homolog isoform X1 [Aedes aegypti] >ref|XP_021710227.1| lateral signaling target protein 2 homolog isoform X1 [Aedes aegypti] >ref|XP_021710238.1| lateral signaling target protein 2 homolog isoform X1 [Aedes aegypti] >ref|XP_021710241.1| lateral signaling target protein 2 homolog isoform X1 [Aedes aegypti] >ref|XP_021712277.1| lateral signaling target protein 2 …
AAEL012117-RC	Up in N1	XR_002500888.1	XP_021702947	mitochondrial carrier protein Rim2 [Aedes aegypti]
AAEL024876-RA	Up in N1	XR_002502881.1	EAT37832	AAEL010220-PB [Aedes aegypti] >gb|EAT37833.1| AAEL010220-PA [Aedes aegypti]
AAEL001557-RH	Up in N1	XM_021840259.1	XP_021695946	mucolipin-3 isoform X1 [Aedes aegypti] >ref|XP_021695947.1| mucolipin-3 isoform X2 [Aedes aegypti]
AAEL009114-RG	Up in N1	XM_021837271.1	NP_001345310	protein doublesex isoform 1 [Aedes aegypti] >ref|XP_021692958.1| protein doublesex isoform X1 [Aedes aegypti] >ref|XP_021692959.1| protein doublesex isoform X1 [Aedes aegypti] >ref|XP_021692960.1| protein doublesex isoform X1 [Aedes aegypti] >ref|XP_021692961.1| protein doublesex isoform X1 [Aedes aegypti] >ref|XP_021692962.1| protein doublesex isoform X1 [Aedes aegypti] >ref|XP_021692963.1| prot…
AAEL004791-RB	Up in N1	XM_001649766.2	XP_001649816	sorting nexin-13 isoform X1 [Aedes aegypti]
AAEL018120-RD	Up in N1	XM_021840871.1	XP_001650653	ribosomal protein S6 kinase beta-2 isoform X1 [Aedes aegypti] >ref|XP_021696561.1| ribosomal protein S6 kinase beta-2 isoform X1 [Aedes aegypti] >ref|XP_021696562.1| ribosomal protein S6 kinase beta-2 isoform X1 [Aedes aegypti] >ref|XP_021696563.1| ribosomal protein S6 kinase beta-2 isoform X2 [Aedes aegypti] >ref|XP_021696564.1| ribosomal protein S6 kinase beta-2 isoform X3 [Aedes aegypti] >ref|…
AAEL008760-RC	Up in N1	XM_021854869.1	XP_001659460	transmembrane protein 164 [Aedes aegypti] >ref|XP_021710560.1| transmembrane protein 164 [Aedes aegypti] >ref|XP_021710561.1| transmembrane protein 164 [Aedes aegypti] >gb|EAT39439.1| AAEL008760-PA [Aedes aegypti]
AAEL014732-RD	Up in N1	XM_021845919.1	XP_001649465	homocysteine-responsive endoplasmic reticulum-resident ubiquitin-like domain member 2 protein isoform X1 [Aedes aegypti] >gb|EAT33011.2| AAEL014732-PA [Aedes aegypti]
AAEL006433-RG	Up in N1	XM_021847853.1	XP_021703538	piezo-type mechanosensitive ion channel component isoform X1 [Aedes aegypti] >ref|XP_021703539.1| piezo-type mechanosensitive ion channel component isoform X1 [Aedes aegypti] >ref|XP_021703540.1| piezo-type mechanosensitive ion channel component isoform X1 [Aedes aegypti] >ref|XP_021703541.1| piezo-type mechanosensitive ion channel component isoform X1 [Aedes aegypti]
AAEL008556-RB	Up in N1	XM_021842906.1	XP_021698598	serine/threonine-protein kinase PRP4 homolog isoform X2 [Aedes aegypti]
AAEL007804-RE	Up in N1	XM_021852108.1	XP_021707800	semaphorin-5A [Aedes aegypti] >ref|XP_021707801.1| semaphorin-5A [Aedes aegypti] >ref|XP_021707802.1| semaphorin-5A [Aedes aegypti] >ref|XP_021707803.1| semaphorin-5A [Aedes aegypti]
AAEL001898-RH	Up in N1	XM_021847001.1	XP_021702687	tubulin polyglutamylase TTLL4 isoform X1 [Aedes aegypti] >ref|XP_021702689.1| tubulin polyglutamylase TTLL4 isoform X1 [Aedes aegypti]
AAEL000196-RA	Up in N1	XM_001658890.2	XP_001658940	alkaline phosphatase, tissue-nonspecific isozyme [Aedes aegypti] >gb|EAT48832.1| AAEL000196-PA [Aedes aegypti]
AAEL021519-RH	Up in N1	XM_021855237.1	XP_021710923	microprocessor complex subunit DGCR8 [Aedes aegypti] >ref|XP_021710924.1| microprocessor complex subunit DGCR8 [Aedes aegypti] >ref|XP_021710925.1| microprocessor complex subunit DGCR8 [Aedes aegypti] >ref|XP_021710926.1| microprocessor complex subunit DGCR8 [Aedes aegypti] >ref|XP_021710927.1| microprocessor complex subunit DGCR8 [Aedes aegypti] >ref|XP_021710928.1| microprocessor complex subuni…
AAEL003529-RB	Up in N1	XM_021844830.1	XP_021700522	zinc finger and BTB domain-containing protein 17 [Aedes aegypti] >ref|XP_021700523.1| zinc finger and BTB domain-containing protein 17 [Aedes aegypti]
AAEL005961-RA	Up in N1	XM_001651695.2	XP_001862809	uncharacterized protein LOC6045438 [Culex quinquefasciatus]
AAEL000217-RC	Up in N1	XM_021855758.1	XP_021711449	serine/threonine-protein kinase Tao isoform X1 [Aedes aegypti] >ref|XP_021711450.1| serine/threonine-protein kinase Tao isoform X1 [Aedes aegypti]
AAEL021559-RA	Up in N1	XR_002500475.1	EAT38714	AAEL009425-PA [Aedes aegypti]
AAEL012595-RE	Up in N1	XM_021839098.1	XP_021694789	uncharacterized protein LOC5576540 isoform X2 [Aedes aegypti] >ref|XP_021694790.1| uncharacterized protein LOC5576540 isoform X2 [Aedes aegypti] >ref|XP_021694791.1| uncharacterized protein LOC5576540 isoform X2 [Aedes aegypti] >ref|XP_021694792.1| uncharacterized protein LOC5576540 isoform X2 [Aedes aegypti] >ref|XP_021694793.1| uncharacterized protein LOC5576540 isoform X2 [Aedes aegypti] >ref|…
AAEL001503-RE	Up in N1	XM_021844926.1	XP_021700618	sodium/hydrogen exchanger 3 isoform X10 [Aedes aegypti]
AAEL002390-RA	Up in N1	XM_001655112.2	XP_001655162	Krueppel homolog 1 isoform X1 [Aedes aegypti]
AAEL003550-RB	Up in N1	XM_021844836.1	XP_021700528	aquaporin AQPcic isoform X1 [Aedes aegypti]
AAEL008953-RG	Up in N1	XM_021840890.1	XP_021696560	transcription factor kayak isoform X2 [Aedes aegypti]
AAEL007992-RA	Up in N1	XM_001658735.2	XP_021693694	serine protease 7 isoform X1 [Aedes aegypti]
AAEL008232-RA	Up in N1	XM_001659014.2	XP_001659064	facilitated trehalose transporter Tret1-2 homolog isoform X1 [Aedes aegypti] >gb|EAT44903.1| AAEL003808-PA [Aedes aegypti]
AAEL007765-RE	Up in Y7	XM_021844046.1	XP_021699738	serine protease inhibitor 42Dd isoform X1 [Aedes aegypti]
AAEL007114-RA	Up in Y7	XM_001652497.2	XP_001652547	protein pinocchio isoform X2 [Aedes aegypti] >gb|EAT41216.1| AAEL007114-PA [Aedes aegypti]
AAEL000566-RA	Up in Y7	XM_021852255.1	XP_021707947	uncharacterized protein LOC5564310 [Aedes aegypti]
AAEL002583-RA	Up in Y7	XM_001655680.2	XP_001655730	toll-like receptor 7 [Aedes aegypti] >gb|EAT46215.1| AAEL002583-PA [Aedes aegypti]
AAEL014238-RD	Up in Y7	XM_001648214.2	XP_021702972	aromatic-L-amino-acid decarboxylase isoform X1 [Aedes aegypti]
AAEL009762-RB	Up in Y7	XM_021838794.1	XP_021694486	cytochrome P450 307a1 [Aedes aegypti]
AAEL011254-RE	Up in Y7	XM_021857682.1	XP_021713374	aprataxin and PNK-like factor isoform X5 [Aedes aegypti]
AAEL017462-RK	Up in Y7	XM_021839813.1	XP_021695504	hippocampus abundant transcript 1 protein isoform X6 [Aedes aegypti] >ref|XP_021695505.1| hippocampus abundant transcript 1 protein isoform X6 [Aedes aegypti]
AAEL010932-RC	Up in Y7	XM_021848642.1	XP_021704334	uncharacterized protein LOC110677665 isoform X2 [Aedes aegypti]
AAEL019469-RA	Up in Y7	XM_021846069.1	XP_001663776	protein G12 [Aedes aegypti] >ref|XP_021701761.1| protein G12 [Aedes aegypti] >ref|XP_021701762.1| protein G12-like [Aedes aegypti] >ref|XP_021712126.1| protein G12-like [Aedes aegypti] >gb|AAL05408.1| microvilli membrane protein [Aedes aegypti] >gb|EAT34153.1| AAEL013577-PC [Aedes aegypti] >gb|EAT34155.1| AAEL013577-PB [Aedes aegypti] >gb|EAT37592.1| AAEL010431-PA [Aedes aegypti]
AAEL009764-RB	Up in Y7	XM_001660288.2	XP_001660338	xaa-Pro aminopeptidase ApepP isoform X1 [Aedes aegypti]
AAEL019470-RA	Up in Y7	XM_001660777.2	XP_001660827	protein G12 [Aedes aegypti] >gb|EAT37594.1| AAEL010429-PA [Aedes aegypti]
AAEL001696-RC	Up in Y7	XM_021841461.1	XP_021697153	retinal homeobox protein Rax isoform X2 [Aedes aegypti]
AAEL006381-RA	Up in Y7	XM_001651908.2	XP_001651958	sphingomyelin phosphodiesterase [Aedes aegypti]
AAEL010435-RB	Up in Y7	XM_021846068.1	XP_021701760	protein G12 [Aedes aegypti]
AAEL006226-RB	Up in Y7	XM_021840813.1	XP_001657595	deoxynucleoside triphosphate triphosphohydrolase SAMHD1 [Aedes aegypti] >ref|XP_021696505.1| deoxynucleoside triphosphate triphosphohydrolase SAMHD1 [Aedes aegypti]
AAEL002636-RA	Up in Y7	XM_001661910.2	XP_001661960	protein ABHD13 [Aedes aegypti] >ref|XP_021700369.1| protein ABHD13 [Aedes aegypti] >ref|XP_021700370.1| protein ABHD13 [Aedes aegypti] >ref|XP_021700371.1| protein ABHD13 [Aedes aegypti] >gb|ABF18278.1| predicted alpha/beta hydrolase BEM46 [Aedes aegypti] >gb|EAT46146.1| AAEL002636-PA [Aedes aegypti]
AAEL007432-RA	Up in Y7	XM_001658309.2	XP_001658359	brachyurin [Aedes aegypti] >gb|ACV07660.1| serine protease I [Aedes aegypti]
AAEL001656-RA	Up in Y7	XM_001653714.2	XP_001653764	putative inorganic phosphate cotransporter isoform X2 [Aedes aegypti] >gb|EAT47235.1| AAEL001656-PA [Aedes aegypti]
AAEL015136-RA	Up in Y7	XM_001647755.2	XP_001647805	protein NPC2 homolog [Aedes aegypti]
AAEL013492-RA	Up in Y7	XM_001663638.3	XP_001663688	phenoloxidase 2 [Aedes aegypti] >ref|XP_021699380.1| phenoloxidase 2 [Aedes aegypti]
AAEL013128-RI	Up in Y7	XM_021843292.1	EAT34657	AAEL013128-PA [Aedes aegypti]
AAEL013118-RB	Up in Y7	XM_001656325.2	XP_001656375	protein G12 [Aedes aegypti] >gb|EAT34666.1| AAEL013118-PB [Aedes aegypti]
AAEL005772-RA	Up in Y7	XM_001651395.2	XP_001651445	general odorant-binding protein 99a [Aedes aegypti] >gb|ABF18110.1| odorant binding protein [Aedes aegypti] >gb|EAT42725.1| AAEL005772-PA [Aedes aegypti]
AAEL012395-RA	Up in Y7	XM_001662479.2	XP_001662529	multidrug resistance-associated protein 4 [Aedes aegypti] >ref|XP_021693721.1| multidrug resistance-associated protein 4 [Aedes aegypti] >gb|EAT35434.1| AAEL012395-PA [Aedes aegypti]
AAEL019737-RD	Up in Y7	XM_021838820.1	XP_021694498	disks large 1 tumor suppressor protein isoform X1 [Aedes aegypti] >ref|XP_021694499.1| disks large 1 tumor suppressor protein isoform X1 [Aedes aegypti] >ref|XP_021694500.1| disks large 1 tumor suppressor protein isoform X1 [Aedes aegypti] >ref|XP_021694501.1| disks large 1 tumor suppressor protein isoform X1 [Aedes aegypti]
AAEL001887-RD	Up in Y7	XM_001654135.2	XP_001654185	glutamine synthetase 1, mitochondrial [Aedes aegypti] >ref|XP_001654186.1| glutamine synthetase 1, mitochondrial [Aedes aegypti] >gb|EAT46939.1| AAEL001887-PA [Aedes aegypti] >gb|EAT46940.1| AAEL001887-PB [Aedes aegypti]
AAEL002467-RA	Up in Y7	XM_001655315.2	AAL05409	peritrophin [Aedes aegypti]
AAEL009479-RB	Up in Y7	XM_021843405.1	XP_021699097	proton-coupled amino acid transporter-like protein CG1139 [Aedes aegypti]
AAEL019471-RA	Up in Y7	XM_021846069.1	XP_001663776	protein G12 [Aedes aegypti] >ref|XP_021701761.1| protein G12 [Aedes aegypti] >ref|XP_021701762.1| protein G12-like [Aedes aegypti] >ref|XP_021712126.1| protein G12-like [Aedes aegypti] >gb|AAL05408.1| microvilli membrane protein [Aedes aegypti] >gb|EAT34153.1| AAEL013577-PC [Aedes aegypti] >gb|EAT34155.1| AAEL013577-PB [Aedes aegypti] >gb|EAT37592.1| AAEL010431-PA [Aedes aegypti]
AAEL013127-RB	Up in Y7	XM_001659734.2	XP_001656378	protein G12 isoform X1 [Aedes aegypti] >ref|XP_001659784.2| protein G12 isoform X1 [Aedes aegypti] >gb|EAT34669.1| AAEL013127-PB [Aedes aegypti]
AAEL006264-RC	Up in Y7	XM_021844094.1	XP_021699786	solute carrier family 2, facilitated glucose transporter member 3 isoform X2 [Aedes aegypti]
AAEL001887-RC	Up in Y7	XM_001654136.2	XP_001654185	glutamine synthetase 1, mitochondrial [Aedes aegypti] >ref|XP_001654186.1| glutamine synthetase 1, mitochondrial [Aedes aegypti] >gb|EAT46939.1| AAEL001887-PA [Aedes aegypti] >gb|EAT46940.1| AAEL001887-PB [Aedes aegypti]
AAEL009165-RA	Up in Y7	XM_001656327.2	XP_021701763	protein G12 isoform X1 [Aedes aegypti] >gb|EAT38997.1| AAEL009165-PA [Aedes aegypti]
AAEL000845-RH	Up in Y7	XM_021854771.1	XP_021710456	phosphatidylinositol phosphatase PTPRQ [Aedes aegypti] >ref|XP_021710457.1| phosphatidylinositol phosphatase PTPRQ [Aedes aegypti] >ref|XP_021710458.1| phosphatidylinositol phosphatase PTPRQ [Aedes aegypti] >ref|XP_021710459.1| phosphatidylinositol phosphatase PTPRQ [Aedes aegypti] >ref|XP_021710460.1| phosphatidylinositol phosphatase PTPRQ [Aedes aegypti] >ref|XP_021710461.1| phosphatidylinosito…
AAEL002261-RC	Up in Y7	XM_021840397.1	XP_001661181	GTP cyclohydrolase 1 isoform X2 [Aedes aegypti] >ref|XP_021696089.1| GTP cyclohydrolase 1 isoform X2 [Aedes aegypti] >ref|XP_021696090.1| GTP cyclohydrolase 1 isoform X2 [Aedes aegypti]
AAEL000271-RD	Up in Y7	XM_001654754.2	XP_001654804	gamma-glutamyl hydrolase isoform X3 [Aedes aegypti]
AAEL011522-RB	Up in Y7	XM_021837326.1	XP_001661722	ras-related and estrogen-regulated growth inhibitor-like protein [Aedes aegypti] >ref|XP_021693018.1| ras-related and estrogen-regulated growth inhibitor-like protein [Aedes aegypti] >ref|XP_021693019.1| ras-related and estrogen-regulated growth inhibitor-like protein [Aedes aegypti] >ref|XP_021693020.1| ras-related and estrogen-regulated growth inhibitor-like protein [Aedes aegypti] >ref|XP_0216…
AAEL006434-RB	Up in Y7	XM_021847866.1	XP_001657807	polyserase-2 isoform X1 [Aedes aegypti] >gb|EAT41962.1| AAEL006434-PA [Aedes aegypti]
AAEL006642-RA	Up in Y7	XM_001652094.2	PBC29447	Tubulin alpha-1 chain [Apis cerana cerana]
AAEL008865-RE	Up in Y7	XM_001653438.2	XP_001653489	oligoribonuclease isoform X1 [Aedes aegypti]
AAEL009114-RD	Up in Y7	XM_021837273.1	XP_021692965	protein doublesex isoform X3 [Aedes aegypti]
AAEL007092-RA	Up in Y7	XM_001658072.2	XP_001658122	putative phospholipase B-like lamina ancestor [Aedes aegypti] >ref|XP_021698045.1| putative phospholipase B-like lamina ancestor [Aedes aegypti] >ref|XP_021698046.1| putative phospholipase B-like lamina ancestor [Aedes aegypti] >ref|XP_021698047.1| putative phospholipase B-like lamina ancestor [Aedes aegypti] >ref|XP_021698048.1| putative phospholipase B-like lamina ancestor [Aedes aegypti] >gb|E…
AAEL010404-RB	Up in Y7	XM_021837744.1	XP_001654529	CSC1-like protein 1 [Aedes aegypti] >ref|XP_021693436.1| CSC1-like protein 1 [Aedes aegypti] >gb|EAT37598.1| AAEL010404-PA [Aedes aegypti]
AAEL008471-RA	Up in Y7	XM_001659225.2	XP_001659275	uncharacterized protein LOC5579397 isoform X1 [Aedes aegypti] >ref|XP_021695789.1| uncharacterized protein LOC5579397 isoform X1 [Aedes aegypti] >ref|XP_021695790.1| uncharacterized protein LOC5579397 isoform X1 [Aedes aegypti] >ref|XP_021695791.1| uncharacterized protein LOC5579397 isoform X1 [Aedes aegypti] >ref|XP_021695792.1| uncharacterized protein LOC5579397 isoform X1 [Aedes aegypti] >gb|E…
AAEL006491-RB	Up in Y7	XM_021850646.1	XP_001652000	GATOR complex protein WDR24 [Aedes aegypti] >ref|XP_021706338.1| GATOR complex protein WDR24 [Aedes aegypti] >gb|EAT41934.1| AAEL006491-PA [Aedes aegypti]
AAEL019956-RF	Up in Y7	XM_021840410.1	XP_021696102	cAMP-dependent protein kinase type I regulatory subunit isoform X2 [Aedes aegypti]
AAEL011177-RA	Up in Y7	XM_001661421.2	XP_001661471	uncharacterized protein LOC5574456 [Aedes aegypti]
AAEL011756-RA	Up in Y7	XM_001655614.2	XP_001655664	putative aldehyde dehydrogenase family 7 member A1 homolog [Aedes aegypti] >ref|XP_021712728.1| putative aldehyde dehydrogenase family 7 member A1 homolog [Aedes aegypti] >gb|EAT36141.1| AAEL011756-PA [Aedes aegypti]
AAEL012595-RN	Up in Y7	XM_021839092.1	XP_021694782	uncharacterized protein LOC5576540 isoform X1 [Aedes aegypti] >ref|XP_021694783.1| uncharacterized protein LOC5576540 isoform X1 [Aedes aegypti] >ref|XP_021694784.1| uncharacterized protein LOC5576540 isoform X1 [Aedes aegypti] >ref|XP_021694785.1| uncharacterized protein LOC5576540 isoform X1 [Aedes aegypti] >ref|XP_021694786.1| uncharacterized protein LOC5576540 isoform X1 [Aedes aegypti] >ref|…
AAEL024784-RB	Up in Y7	XM_021838381.1	XP_021694073	uncharacterized protein LOC5571232 isoform X1 [Aedes aegypti]
AAEL012102-RB	Up in Y7	XM_021838739.1	XP_001655865	gametogenetin-binding protein 2-like [Aedes aegypti] >ref|XP_021694431.1| gametogenetin-binding protein 2-like [Aedes aegypti] >gb|EAT35761.1| AAEL012102-PA [Aedes aegypti]
AAEL024689-RA	Up in Y7	XM_021856856.1	XP_021697940	kinesin-like protein KIN-7O [Aedes aegypti] >ref|XP_021697941.1| kinesin-like protein KIN-7O [Aedes aegypti] >ref|XP_021697942.1| kinesin-like protein KIN-7O [Aedes aegypti]
AAEL002102-RB	Up in Y7	XM_021849253.1	XP_001654729	ero1-like protein [Aedes aegypti] >ref|XP_021704945.1| ero1-like protein [Aedes aegypti]
AAEL013078-RF	Up in Y7	XM_021839330.1	XP_021695017	probable Dol-P-Man:Man(7)GlcNAc(2)-PP-Dol alpha-1,6-mannosyltransferase [Aedes aegypti] >ref|XP_021695018.1| probable Dol-P-Man:Man(7)GlcNAc(2)-PP-Dol alpha-1,6-mannosyltransferase [Aedes aegypti] >ref|XP_021695019.1| probable Dol-P-Man:Man(7)GlcNAc(2)-PP-Dol alpha-1,6-mannosyltransferase [Aedes aegypti] >ref|XP_021695020.1| probable Dol-P-Man:Man(7)GlcNAc(2)-PP-Dol alpha-1,6-mannosyltransferase …
AAEL005152-RB	Up in Y7	XM_021849966.1	XP_021705654	uncharacterized protein LOC5566048 isoform X1 [Aedes aegypti]
AAEL000328-RC	Up in Y7	XM_021846597.1	XP_021702288	zinc-type alcohol dehydrogenase-like protein C1773.06c isoform X1 [Aedes aegypti]
AAEL005915-RJ	Up in Y7	XM_021851840.1	XP_021707529	uncharacterized protein LOC5567273 [Aedes aegypti] >ref|XP_021707530.1| uncharacterized protein LOC5567273 [Aedes aegypti] >ref|XP_021707531.1| uncharacterized protein LOC5567273 [Aedes aegypti] >ref|XP_021707532.1| uncharacterized protein LOC5567273 [Aedes aegypti] >ref|XP_021707533.1| uncharacterized protein LOC5567273 [Aedes aegypti] >ref|XP_021707534.1| uncharacterized protein LOC5567273 [Aed…
AAEL008832-RC	Up in Y7	XM_021850077.1	XP_001659572	uncharacterized protein LOC5571132 [Aedes aegypti] >ref|XP_021705768.1| uncharacterized protein LOC5571132 [Aedes aegypti] >ref|XP_021705769.1| uncharacterized protein LOC5571132 [Aedes aegypti] >ref|XP_021705770.1| uncharacterized protein LOC5571132 [Aedes aegypti] >ref|XP_021705771.1| uncharacterized protein LOC5571132 [Aedes aegypti] >ref|XP_021705772.1| uncharacterized protein LOC5571132 [Aed…
AAEL002415-RG	Up in Y7	XM_021853835.1	XP_021709512	LIM and senescent cell antigen-like-containing domain protein 1 isoform X1 [Aedes aegypti]
AAEL019845-RC	Up in Y7	XM_021850561.1	XP_021706252	uncharacterized protein LOC5577433 isoform X1 [Aedes aegypti] >ref|XP_021706253.1| uncharacterized protein LOC5577433 isoform X1 [Aedes aegypti]
AAEL010793-RB	Up in Y7	XM_021854307.1	XP_021709999	F-box/LRR-repeat protein 7 isoform X1 [Aedes aegypti]
AAEL003631-RA	Up in Y7	XM_001657037.3	XP_001657087	serine protease easter [Aedes aegypti]
AAEL010190-RG	Up in Y7	XM_021842730.1	XP_021698423	FH1/FH2 domain-containing protein 1 isoform X5 [Aedes aegypti]
AAEL012676-RE	Up in Y7	XM_001656152.2	XP_001656202	exonuclease 3'-5' domain-containing protein 2 [Aedes aegypti] >ref|XP_001656203.1| exonuclease 3'-5' domain-containing protein 2 [Aedes aegypti] >ref|XP_021708282.1| exonuclease 3'-5' domain-containing protein 2 [Aedes aegypti] >gb|EAT35132.1| AAEL012676-PB [Aedes aegypti] >gb|EAT35133.1| AAEL012676-PA [Aedes aegypti]
AAEL019603-RC	Up in Y7	XM_021844571.1	XP_021700263	probable cytochrome P450 9f2 isoform X2 [Aedes aegypti]
AAEL004025-RD	Up in Y7	XM_021854952.1	XP_021710644	glucose dehydrogenase [FAD, quinone] isoform X3 [Aedes aegypti] >ref|XP_021710645.1| glucose dehydrogenase [FAD, quinone] isoform X3 [Aedes aegypti]
AAEL004853-RC	Up in Y7	XM_021842051.1	XP_001649900	glycerol kinase [Aedes aegypti] >ref|XP_021697742.1| glycerol kinase [Aedes aegypti] >ref|XP_021697743.1| glycerol kinase [Aedes aegypti] >ref|XP_021697744.1| glycerol kinase [Aedes aegypti] >ref|XP_021697745.1| glycerol kinase [Aedes aegypti] >ref|XP_021697746.1| glycerol kinase [Aedes aegypti] >gb|EAT43737.1| AAEL004853-PA [Aedes aegypti]
AAEL028239-RC	Up in Y7	XM_021849611.1	XP_021705302	ubiquitin domain-containing protein 1 [Aedes aegypti] >ref|XP_021705303.1| ubiquitin domain-containing protein 1 [Aedes aegypti] >ref|XP_021705304.1| ubiquitin domain-containing protein 1 [Aedes aegypti] >ref|XP_021705305.1| ubiquitin domain-containing protein 1 [Aedes aegypti] >ref|XP_021705307.1| ubiquitin domain-containing protein 1 [Aedes aegypti] >ref|XP_021705308.1| ubiquitin domain-contain…
AAEL008635-RB	Up in Y7	XM_001653314.2	XP_001653364	ATP-binding cassette sub-family G member 4 [Aedes aegypti]
AAEL006135-RA	Up in Y7	XM_001657471.2	XP_001657521	nuclear cap-binding protein subunit 2 [Aedes aegypti] >sp|Q177H0.1| RecName: Full=Nuclear cap-binding protein subunit 2; AltName: Full=20 kDa nuclear cap-binding protein; AltName: Full=NCBP 20 kDa subunit; Short=CBP20 [Aedes aegypti] >gb|EAT42307.1| AAEL006135-PA [Aedes aegypti]
AAEL025250-RB	Up in Y7	XM_021837550.1	EAT35082	AAEL012727-PA [Aedes aegypti]
AAEL006181-RD	Up in Y7	XM_021849300.1	XP_001651825	fatty-acid amide hydrolase 2-B isoform X1 [Aedes aegypti] >gb|EAT42271.1| AAEL006181-PA [Aedes aegypti]
AAEL014344-RA	Up in Y7	XM_001648484.2	XP_001648534	zinc metalloproteinase-disintegrin-like EoMP06 [Aedes aegypti] >ref|XP_021693627.1| zinc metalloproteinase-disintegrin-like EoMP06 [Aedes aegypti] >ref|XP_021693628.1| zinc metalloproteinase-disintegrin-like EoMP06 [Aedes aegypti] >ref|XP_021693629.1| zinc metalloproteinase-disintegrin-like EoMP06 [Aedes aegypti]
AAEL004083-RF	Up in Y7	XM_021855600.1	XP_021711288	echinoderm microtubule-associated protein-like 2 isoform X1 [Aedes aegypti] >ref|XP_021711289.1| echinoderm microtubule-associated protein-like 2 isoform X1 [Aedes aegypti] >ref|XP_021711290.1| echinoderm microtubule-associated protein-like 2 isoform X1 [Aedes aegypti] >ref|XP_021711291.1| echinoderm microtubule-associated protein-like 2 isoform X1 [Aedes aegypti] >ref|XP_021711292.1| echinoderm …
AAEL000709-RC	Up in Y7	XM_021848127.1	XP_001650267	NF-kappa-B inhibitor cactus isoform X1 [Aedes aegypti]
AAEL003433-RC	Up in Y7	XM_021853645.1	XP_021709337	copper-transporting ATPase 1 isoform X3 [Aedes aegypti]
AAEL012187-RC	Up in Y7	XM_021843467.1	XP_001662296	uncharacterized protein LOC5575936 isoform X1 [Aedes aegypti] >ref|XP_021699157.1| uncharacterized protein LOC5575936 isoform X1 [Aedes aegypti]
AAEL022136-RG	Up in Y7	XM_021843539.1	XP_021699228	uncharacterized protein LOC5577147 isoform X1 [Aedes aegypti] >ref|XP_021699229.1| uncharacterized protein LOC5577147 isoform X1 [Aedes aegypti] >ref|XP_021699230.1| uncharacterized protein LOC5577147 isoform X1 [Aedes aegypti] >ref|XP_021699231.1| uncharacterized protein LOC5577147 isoform X1 [Aedes aegypti] >ref|XP_021699232.1| uncharacterized protein LOC5577147 isoform X1 [Aedes aegypti] >ref|…
AAEL012945-RD	Up in Y7	XM_021854416.1	XP_021710108	uncharacterized protein LOC5577032 isoform X2 [Aedes aegypti]
AAEL009544-RB	Up in Y7	XM_021849402.1	XP_021705094	uncharacterized protein LOC5572135 isoform X1 [Aedes aegypti]
AAEL003264-RC	Up in Y7	XM_021846549.1	XP_021702241	proteasome assembly chaperone 4 isoform X1 [Aedes aegypti]
AAEL008559-RA	Up in Y7	XM_001653249.2	EAT39659	AAEL008559-PA [Aedes aegypti]
AAEL011242-RA	Up in Y7	XM_001661468.2	XP_001661518	UDP-glucose 6-dehydrogenase [Aedes aegypti] >gb|EAT36695.1| AAEL011242-PA [Aedes aegypti]
AAEL000595-RD	Up in Y7	XM_021851187.1	XP_021706875	uncharacterized protein LOC5564316 [Aedes aegypti] >ref|XP_021706876.1| uncharacterized protein LOC5564316 [Aedes aegypti] >ref|XP_021706878.1| uncharacterized protein LOC5564316 [Aedes aegypti] >ref|XP_021706879.1| uncharacterized protein LOC5564316 [Aedes aegypti] >ref|XP_021706880.1| uncharacterized protein LOC5564316 [Aedes aegypti]
AAEL008953-RC	Up in Y7	XM_001653567.2	XP_001653617	transcription factor kayak isoform X3 [Aedes aegypti] >gb|EAT39223.1| AAEL008953-PC [Aedes aegypti]
AAEL027505-RB	Up in Y7	XM_001653669.2	XP_001653719	mitochondrial inner membrane protein COX18 [Aedes aegypti] >ref|XP_011493059.2| mitochondrial inner membrane protein COX18 [Aedes aegypti]
AAEL003534-RG	Up in Y7	XM_021844825.1	XP_021700513	uncharacterized protein DDB_G0283357 isoform X1 [Aedes aegypti]
AAEL013227-RC	Up in Y7	XM_021851616.1	XP_021707307	protein aubergine isoform X1 [Aedes aegypti]
AAEL000213-RA	Up in Y7	XM_001658835.2	XP_001658885	D-amino-acid oxidase [Aedes aegypti]
AAEL026355-RA	Up in Y7	XM_021850596.1	XP_021706290	host cell factor isoform X3 [Aedes aegypti]
AAEL019620-RA	Up in Y7	XM_021840230.1	EAT35699	AAEL012155-PA [Aedes aegypti]
AAEL013992-RC	Up in Y7	XM_021841743.1	XP_001657257	protein Asterix [Aedes aegypti] >ref|XP_021697435.1| protein Asterix [Aedes aegypti] >ref|XP_021697436.1| protein Asterix [Aedes aegypti]
AAEL011803-RB	Up in Y7	XM_021854489.1	XP_021710181	band 7 protein AGAP004871 isoform X1 [Aedes aegypti]
AAEL019556-RE	Up in Y7	XM_021852564.1	XP_021708256	histone-lysine N-methyltransferase 2D isoform X4 [Aedes aegypti]
AAEL008630-RD	Up in Y7	XM_021848081.1	XP_001653369	guanine nucleotide-binding protein subunit alpha homolog [Aedes aegypti] >ref|XP_021703771.1| guanine nucleotide-binding protein subunit alpha homolog [Aedes aegypti] >ref|XP_021703772.1| guanine nucleotide-binding protein subunit alpha homolog [Aedes aegypti] >ref|XP_021703773.1| guanine nucleotide-binding protein subunit alpha homolog [Aedes aegypti] >ref|XP_021703774.1| guanine nucleotide-bind…
AAEL025976-RA	Up in Y7	XM_021838339.1	XP_021694031	uncharacterized protein LOC5577579 isoform X1 [Aedes aegypti] >ref|XP_021694032.1| uncharacterized protein LOC5577579 isoform X1 [Aedes aegypti]
AAEL005106-RE	Up in Y7	XM_021843175.1	XP_001650392	nicotinamide riboside kinase 1 [Aedes aegypti] >ref|XP_021698864.1| nicotinamide riboside kinase 1 [Aedes aegypti] >ref|XP_021698865.1| nicotinamide riboside kinase 1 [Aedes aegypti] >ref|XP_021698866.1| nicotinamide riboside kinase 1 [Aedes aegypti] >ref|XP_021698867.1| nicotinamide riboside kinase 1 [Aedes aegypti] >gb|EAT43459.1| AAEL005106-PA [Aedes aegypti]
AAEL024418-RA	Up in Y7	XR_002501937.1	not available	not available
AAEL004297-RJ	Up in Y7	XM_021845400.1	XP_021701091	ATP-citrate synthase isoform X3 [Aedes aegypti] >ref|XP_021701092.1| ATP-citrate synthase isoform X3 [Aedes aegypti]
AAEL026747-RA	Up in Y7	XM_021852131.1	XP_021707823	beta-1,3-galactosyltransferase 5 isoform X1 [Aedes aegypti]
AAEL007547-RC	Up in Y7	XM_021840042.1	XP_021695734	H(+)/Cl(-) exchange transporter 7 isoform X2 [Aedes aegypti]
AAEL011388-RA	Up in Y7	XM_001655269.2	XP_001655319	vacuolar-sorting protein SNF8 [Aedes aegypti]
AAEL006921-RA	Up in Y7	XM_001652279.2	XP_001652329	calmodulin isoform X2 [Aedes aegypti] >ref|XP_021705847.1| calmodulin isoform X2 [Aedes aegypti] >ref|XP_021705849.1| calmodulin isoform X2 [Aedes aegypti] >ref|XP_021705850.1| calmodulin isoform X2 [Aedes aegypti] >ref|XP_021705851.1| calmodulin isoform X2 [Aedes aegypti] >ref|XP_021705852.1| calmodulin isoform X2 [Aedes aegypti] >gb|EAT41444.1| AAEL006921-PA [Aedes aegypti]
AAEL023125-RB	Up in Y7	XM_021838648.1	XP_021694340	uncharacterized protein LOC5572392 [Aedes aegypti]
AAEL019424-RAC	Up in Y7	XM_021838932.1	XP_021694624	uncharacterized protein LOC5574328 isoform X12 [Aedes aegypti] >ref|XP_021694625.1| uncharacterized protein LOC5574328 isoform X12 [Aedes aegypti] >ref|XP_021694626.1| uncharacterized protein LOC5574328 isoform X12 [Aedes aegypti] >ref|XP_021694627.1| uncharacterized protein LOC5574328 isoform X12 [Aedes aegypti] >ref|XP_021694628.1| uncharacterized protein LOC5574328 isoform X12 [Aedes aegypti] …
AAEL010974-RB	Up in Y7	XM_021842739.1	XP_021698430	uncharacterized protein LOC5574157 [Aedes aegypti] >ref|XP_021698431.1| uncharacterized protein LOC5574157 [Aedes aegypti] >ref|XP_021698432.1| uncharacterized protein LOC5574157 [Aedes aegypti] >ref|XP_021698433.1| uncharacterized protein LOC5574157 [Aedes aegypti]
AAEL011964-RA	Up in Y7	XM_001655726.2	XP_001655776	zinc finger protein 70 [Aedes aegypti] >ref|XP_021706179.1| zinc finger protein 70 [Aedes aegypti] >ref|XP_021706180.1| zinc finger protein 70 [Aedes aegypti] >gb|EAT35910.1| AAEL011964-PA [Aedes aegypti]
AAEL024296-RA	Up in Y7	XM_021841297.1	XP_021696989	uncharacterized protein LOC110675672 [Aedes aegypti]
AAEL008111-RB	Up in Y7	XM_021850637.1	XP_001653113	immunoglobulin domain-containing protein oig-4 [Aedes aegypti] >ref|XP_021706329.1| immunoglobulin domain-containing protein oig-4 [Aedes aegypti] >gb|EAT40133.1| AAEL008111-PA [Aedes aegypti]
AAEL008921-RG	Up in Y7	XM_001653472.2	XP_001653522	myosin regulatory light chain sqh isoform X1 [Aedes aegypti] >ref|XP_001653523.2| myosin regulatory light chain sqh isoform X1 [Aedes aegypti]
AAEL023715-RA	Up in Y7	XR_002500379.1	not available	not available
AAEL006321-RA	Up in Y7	XM_001651845.2	XP_001651895	acyl-CoA:lysophosphatidylglycerol acyltransferase 1 [Aedes aegypti] >ref|XP_021705109.1| acyl-CoA:lysophosphatidylglycerol acyltransferase 1 [Aedes aegypti] >gb|EAT42122.1| AAEL006321-PA [Aedes aegypti]
AAEL005544-RF	Up in Y7	XM_021851499.1	XP_021707190	YTH domain-containing family protein 3 isoform X1 [Aedes aegypti] >ref|XP_021707191.1| YTH domain-containing family protein 3 isoform X1 [Aedes aegypti] >ref|XP_021707193.1| YTH domain-containing family protein 3 isoform X1 [Aedes aegypti] >ref|XP_021707194.1| YTH domain-containing family protein 3 isoform X1 [Aedes aegypti]
AAEL008596-RA	Up in Y7	XM_021846515.1	XP_021702207	protein spaetzle 3 [Aedes aegypti] >ref|XP_021702208.1| protein spaetzle 3 [Aedes aegypti] >ref|XP_021702209.1| protein spaetzle 3 [Aedes aegypti] >gb|EAT39601.1| AAEL008596-PA [Aedes aegypti]
AAEL013875-RB	Up in Y7	XM_001657132.2	XP_001657182	23 kDa integral membrane protein isoform X2 [Aedes aegypti]
AAEL020092-RB	Up in Y7	XM_021854367.1	XP_019537161	protein scylla isoform X2 [Aedes albopictus] >ref|XP_029731328.1| protein scylla-like [Aedes albopictus] >ref|XP_029731329.1| protein scylla-like isoform X2 [Aedes albopictus] >ref|XP_029731332.1| protein scylla-like isoform X2 [Aedes albopictus]
AAEL027055-RA	Up in Y7	XM_021850901.1	XP_021706593	rRNA-processing protein FYV7-like [Aedes aegypti]
AAEL011663-RC	Up in Y7	XM_021850234.1	XP_021705926	uncharacterized protein LOC5575101 isoform X1 [Aedes aegypti] >ref|XP_021705927.1| uncharacterized protein LOC5575101 isoform X1 [Aedes aegypti]
AAEL000405-RE	Up in Y7	XM_021855177.1	XP_021710867	teneurin-m isoform X6 [Aedes aegypti]
AAEL013466-RG	Up in Y7	XM_021846276.1	XP_021701968	ankyrin-2 isoform X6 [Aedes aegypti]
AAEL024664-RA	Up in Y7	XR_002503021.1	EAT43395	AAEL005154-PA [Aedes aegypti]
AAEL009371-RG	Up in Y7	XM_021853952.1	XP_021709642	formin-like protein CG32138 [Aedes aegypti] >ref|XP_021709643.1| formin-like protein CG32138 [Aedes aegypti] >ref|XP_021709644.1| formin-like protein CG32138 [Aedes aegypti] >ref|XP_021709645.1| formin-like protein CG32138 [Aedes aegypti] >ref|XP_021709646.1| formin-like protein CG32138 [Aedes aegypti] >ref|XP_021709647.1| formin-like protein CG32138 [Aedes aegypti]
AAEL001699-RC	Up in Y7	XM_021841450.1	XP_001659954	uncharacterized protein LOC5571822 [Aedes aegypti] >ref|XP_021697141.1| uncharacterized protein LOC5571822 [Aedes aegypti] >ref|XP_021697142.1| uncharacterized protein LOC5571822 [Aedes aegypti] >ref|XP_021697143.1| uncharacterized protein LOC5571822 [Aedes aegypti]
AAEL026676-RB	Up in Y7	XM_021854358.1	XP_021710049	p53 and DNA damage-regulated protein 1 [Aedes aegypti] >ref|XP_021710050.1| p53 and DNA damage-regulated protein 1 [Aedes aegypti]
AAEL011810-RC	Up in Y7	XM_021848899.1	XP_021704590	uncharacterized protein LOC5575405 [Aedes aegypti] >ref|XP_021704591.1| uncharacterized protein LOC5575405 [Aedes aegypti]
AAEL027557-RA	Up in Y7	XM_021839552.1	XP_021695244	kinesin light chain-like [Aedes aegypti]
AAEL022490-RH	Up in Y7	XM_021857505.1	XP_021713195	CDP-diacylglycerol--glycerol-3-phosphate 3-phosphatidyltransferase, mitochondrial isoform X1 [Aedes aegypti] >ref|XP_021713196.1| CDP-diacylglycerol--glycerol-3-phosphate 3-phosphatidyltransferase, mitochondrial isoform X1 [Aedes aegypti] >ref|XP_021713197.1| CDP-diacylglycerol--glycerol-3-phosphate 3-phosphatidyltransferase, mitochondrial isoform X1 [Aedes aegypti] >ref|XP_021713198.1| CDP-diacy…
AAEL025250-RC	Up in Y7	XM_021837553.1	EAT35082	AAEL012727-PA [Aedes aegypti]
AAEL022067-RA	Up in Y7	XM_021857225.1	XP_001652914	regulator of chromosome condensation [Aedes aegypti] >ref|XP_011493398.1| regulator of chromosome condensation [Aedes aegypti] >ref|XP_021712917.1| regulator of chromosome condensation-like [Aedes aegypti] >ref|XP_021712918.1| regulator of chromosome condensation-like [Aedes aegypti] >gb|EAT40461.1| AAEL007799-PA [Aedes aegypti] >gb|EJY57703.1| AAEL007799-PB [Aedes aegypti]
AAEL006201-RA	Up in Y7	XM_001657525.2	XP_001657575	uncharacterized protein LOC5567598 [Aedes aegypti] >ref|XP_021711623.1| uncharacterized protein LOC5567598 [Aedes aegypti]
AAEL010095-RF	Up in Y7	XM_001654192.2	XP_001654241	small integral membrane protein 14 [Aedes aegypti] >ref|XP_001654242.1| small integral membrane protein 14 [Aedes aegypti] >ref|XP_001654243.1| small integral membrane protein 14 [Aedes aegypti] >gb|ABF18072.1| conserved protein, partial [Aedes aegypti] >gb|EAT37964.1| AAEL010095-PB [Aedes aegypti] >gb|EAT37965.1| AAEL010095-PC [Aedes aegypti] >gb|EAT37966.1| AAEL010095-PA [Aedes aegypti]
AAEL006472-RD	Up in Y7	XM_021855310.1	XP_021711002	dmX-like protein 2 isoform X3 [Aedes aegypti]
AAEL013026-RB	Up in Y7	XM_021856923.1	XP_021712611	soluble guanylate cyclase 89Db [Aedes aegypti] >ref|XP_021712615.1| soluble guanylate cyclase 89Db [Aedes aegypti]
AAEL023729-RA	Up in Y7	XM_021852277.1	XP_021707969	trypsin 5G1-like [Aedes aegypti]
AAEL003192-RA	Up in Y7	XM_001656476.2	XP_001656526	solute carrier family 22 member 5 [Aedes aegypti] >ref|XP_021711759.1| solute carrier family 22 member 5 [Aedes aegypti] >gb|EAT45535.1| AAEL003192-PA [Aedes aegypti]
AAEL014274-RA	Up in Y7	XM_001648283.2	XP_001648333	uncharacterized protein LOC5564013 isoform X2 [Aedes aegypti] >gb|EAT33451.1| AAEL014274-PA [Aedes aegypti]
AAEL006870-RG	Up in Y7	XM_021850671.1	XP_001652281	sorting nexin-17 [Aedes aegypti] >ref|XP_021706358.1| sorting nexin-17 [Aedes aegypti] >ref|XP_021706359.1| sorting nexin-17 [Aedes aegypti] >ref|XP_021706360.1| sorting nexin-17 [Aedes aegypti] >ref|XP_021706361.1| sorting nexin-17 [Aedes aegypti] >ref|XP_021706362.1| sorting nexin-17 [Aedes aegypti] >ref|XP_021706363.1| sorting nexin-17 [Aedes aegypti] >gb|EAT41496.1| AAEL006870-PA [Aedes aegyp…
AAEL026025-RA	Up in Y7	XM_001663726.2	XP_001663776	protein G12 [Aedes aegypti] >ref|XP_021701761.1| protein G12 [Aedes aegypti] >ref|XP_021701762.1| protein G12-like [Aedes aegypti] >ref|XP_021712126.1| protein G12-like [Aedes aegypti] >gb|AAL05408.1| microvilli membrane protein [Aedes aegypti] >gb|EAT34153.1| AAEL013577-PC [Aedes aegypti] >gb|EAT34155.1| AAEL013577-PB [Aedes aegypti] >gb|EAT37592.1| AAEL010431-PA [Aedes aegypti]
AAEL013715-RA	Up in Y7	XM_001663848.2	XP_001663898	trypsin 5G1-like [Aedes aegypti]
AAEL010202-RA	Up in Y7	XM_001660626.2	XP_001660676	trypsin 5G1-like [Aedes aegypti] >gb|ACV07666.1| serine protease VII [Aedes aegypti] >gb|EAT34028.1| AAEL013713-PA [Aedes aegypti]
AAEL026981-RA	Up in Y7	XM_001663726.2	XP_001663776	protein G12 [Aedes aegypti] >ref|XP_021701761.1| protein G12 [Aedes aegypti] >ref|XP_021701762.1| protein G12-like [Aedes aegypti] >ref|XP_021712126.1| protein G12-like [Aedes aegypti] >gb|AAL05408.1| microvilli membrane protein [Aedes aegypti] >gb|EAT34153.1| AAEL013577-PC [Aedes aegypti] >gb|EAT34155.1| AAEL013577-PB [Aedes aegypti] >gb|EAT37592.1| AAEL010431-PA [Aedes aegypti]
AAEL009438-RA	Up in Y7	XM_001660004.2	XP_001660054	ATP-dependent DNA helicase DDX11 [Aedes aegypti] >gb|EAT38683.1| AAEL009438-PA [Aedes aegypti]
AAEL009660-RC	Up in Y7	XM_021850587.1	XP_021706279	serine/arginine repetitive matrix protein 2 isoform X3 [Aedes aegypti]
AAEL008364-RB	Up in Y7	XM_021849247.1	XP_021704939	serine protease inhibitor 88Ea isoform X1 [Aedes aegypti]
AAEL015073-RB	Up in Y7	XM_021846195.1	XP_021701887	T-box protein H15 [Aedes aegypti]
AAEL008370-RA	Up in Y7	XM_001653175.3	XP_001653225	protein peste [Aedes aegypti] >ref|XP_021709728.1| protein peste [Aedes aegypti] >ref|XP_021709729.1| protein peste [Aedes aegypti] >ref|XP_021709730.1| protein peste [Aedes aegypti] >ref|XP_021709732.1| protein peste [Aedes aegypti] >ref|XP_021709733.1| protein peste [Aedes aegypti] >ref|XP_021709734.1| protein peste [Aedes aegypti]
AAEL009166-RA	Up in Y7	XM_001656328.2	XP_001656378	protein G12 isoform X1 [Aedes aegypti] >ref|XP_001659784.2| protein G12 isoform X1 [Aedes aegypti] >gb|EAT34669.1| AAEL013127-PB [Aedes aegypti]
AAEL006133-RB	Up in Y7	XM_021850153.1	XP_021705845	programmed cell death protein 7 isoform X1 [Aedes aegypti]
AAEL002308-RC	Up in Y7	XM_021851792.1	XP_001661247	protein TIS11 [Aedes aegypti] >ref|XP_021707483.1| protein TIS11 [Aedes aegypti] >ref|XP_021707484.1| protein TIS11 [Aedes aegypti] >ref|XP_021707485.1| protein TIS11 [Aedes aegypti] >ref|XP_021707486.1| protein TIS11 [Aedes aegypti]
AAEL011158-RC	Up in Y7	XM_021855728.1	XP_001661452	apoptosis-inducing factor 3 isoform X1 [Aedes aegypti]
AAEL024439-RA	Up in Y7	XR_002500673.1	XP_021701457	uncharacterized protein LOC110676737 [Aedes aegypti]
AAEL013712-RA	Up in Y7	XM_001663845.2	EAT34030	AAEL013706-PA [Aedes aegypti]
AAEL007601-RA	Up in Y7	XM_001658441.2	XP_001658491	trypsin 5G1-like [Aedes aegypti]
AAEL011099-RB	Up in Y7	XM_021844408.1	XP_021700100	FAD synthase isoform X1 [Aedes aegypti]
AAEL010196-RA	Up in Y7	XM_001660623.2	XP_001660673	trypsin 5G1-like [Aedes aegypti] >gb|ACV07665.1| serine protease VI [Aedes aegypti]
AAEL003992-RB	Up in Y7	XM_021854072.1	XP_001648222	SET and MYND domain-containing protein 4 [Aedes aegypti] >ref|XP_021709764.1| SET and MYND domain-containing protein 4 [Aedes aegypti]
AAEL004451-RD	Up in Y7	XM_021849716.1	XP_021705408	organic cation transporter protein isoform X1 [Aedes aegypti] >ref|XP_021705409.1| organic cation transporter protein isoform X1 [Aedes aegypti] >ref|XP_021705410.1| organic cation transporter protein isoform X1 [Aedes aegypti]
AAEL014820-RB	Up in Y7	XM_021850820.1	XP_021706508	uncharacterized protein LOC5565331 isoform X1 [Aedes aegypti]
AAEL026600-RA	Up in Y7	XM_021856436.1	XP_021712128	programmed cell death 6-interacting protein-like [Aedes aegypti]
[truncated: 10 more rows]
