# Supplementary material for: Dehydration Alters Transcript Levels in the Mosquito Midgut, Likely Facilitating Rapid Rehydration following a Bloodmeal
Source: Insects. 2023 Mar 9;14(3):274. doi: 10.3390/insects14030274 (PMC10056721; doi:10.3390/insects14030274)
Supplement: Supplementary file 1 [file insects-14-00274-s001.zip › Supplementary_Table_S3.xlsx]

## Sheet: Y1N1_BP
% WARNING - This exported Revigo data is only useful for the specific purpose of constructing a TreeMap visualization.
% Do not use this table as a general list of non-redundant GO categories	as it sets an extremely permissive
% threshold to detect redundancies (c=0.10) and fill the 'representative' column	while normally c>=0.4 is recommended.
% To export a reduced-redundancy set of GO terms	go to the Scatterplot & Table tab	and export to CSV from there.
TermID	Name	Frequency	Value	Uniqueness	Dispensability	Representative
GO:0006508	"proteolysis"	5.78607	-1.91107	1	0	"proteolysis"

## Sheet: Y1N1_MF
% WARNING - This exported Revigo data is only useful for the specific purpose of constructing a TreeMap visualization.
% Do not use this table as a general list of non-redundant GO categories	as it sets an extremely permissive
% threshold to detect redundancies (c=0.10) and fill the 'representative' column	while normally c>=0.4 is recommended.
% To export a reduced-redundancy set of GO terms	go to the Scatterplot & Table tab	and export to CSV from there.
TermID	Name	Frequency	Value	Uniqueness	Dispensability	Representative
GO:0003824	"catalytic activity"	63.5067	-2.09409	1	0	"catalytic activity"
GO:0008233	"peptidase activity"	4.22935	-2.4435	0.406565	0	"peptidase activity"
GO:0017171	"serine hydrolase activity"	1.32968	-2.22203	0.645834	0.34371	"peptidase activity"
GO:0004252	"serine-type endopeptidase activity"	0.893165	-2.54592	0.36933	0.681318	"peptidase activity"
GO:0016787	"hydrolase activity"	20.0267	-1.63013	0.908737	0.0694533	"hydrolase activity"

## Sheet: N1Y1_BP
% WARNING - This exported Revigo data is only useful for the specific purpose of constructing a TreeMap visualization.
% Do not use this table as a general list of non-redundant GO categories	as it sets an extremely permissive
% threshold to detect redundancies (c=0.10) and fill the 'representative' column	while normally c>=0.4 is recommended.
% To export a reduced-redundancy set of GO terms	go to the Scatterplot & Table tab	and export to CSV from there.
TermID	Name	Frequency	Value	Uniqueness	Dispensability	Representative
GO:0050789	"regulation of biological process"	21.7651	-1.70991	1	0	"regulation of biological process"
GO:0065007	"biological regulation"	23.3881	-1.39691	1	0	"biological regulation"

## Sheet: N1Y1_MF
% WARNING - This exported Revigo data is only useful for the specific purpose of constructing a TreeMap visualization.
% Do not use this table as a general list of non-redundant GO categories	as it sets an extremely permissive
% threshold to detect redundancies (c=0.10) and fill the 'representative' column	while normally c>=0.4 is recommended.
% To export a reduced-redundancy set of GO terms	go to the Scatterplot & Table tab	and export to CSV from there.
TermID	Name	Frequency	Value	Uniqueness	Dispensability	Representative
GO:0034597	"phosphatidylinositol-45-bisphosphate 4-phosphatase activity"	0.00459584	-1.32623	1	0	"phosphatidylinositol-45-bisphosphate 4-phosphatase activity"

## Sheet: N7N1_CC
% WARNING - This exported Revigo data is only useful for the specific purpose of constructing a TreeMap visualization.
% Do not use this table as a general list of non-redundant GO categories	as it sets an extremely permissive
% threshold to detect redundancies (c=0.10) and fill the 'representative' column	while normally c>=0.4 is recommended.
% To export a reduced-redundancy set of GO terms	go to the Scatterplot & Table tab	and export to CSV from there.
TermID	Name	Frequency	Value	Uniqueness	Dispensability	Representative
GO:0030054	"cell junction"	0.850077	-2.29247	0.999952	0	"cell junction"
GO:0070161	"anchoring junction"	0.310499	-2.03523	0.2751	2.63e-05	"anchoring junction"

## Sheet: N1N7_BP
% WARNING - This exported Revigo data is only useful for the specific purpose of constructing a TreeMap visualization.
% Do not use this table as a general list of non-redundant GO categories	as it sets an extremely permissive
% threshold to detect redundancies (c=0.10) and fill the 'representative' column	while normally c>=0.4 is recommended.
% To export a reduced-redundancy set of GO terms	go to the Scatterplot & Table tab	and export to CSV from there.
TermID	Name	Frequency	Value	Uniqueness	Dispensability	Representative
GO:0009306	"protein secretion"	0.384639	-1.77807	0.0381916	0	"protein secretion"
GO:0071692	"protein localization to extracellular region"	0.386225	-1.77807	0.149224	0.613687	"protein secretion"

## Sheet: N1N7_CC
% WARNING - This exported Revigo data is only useful for the specific purpose of constructing a TreeMap visualization.
% Do not use this table as a general list of non-redundant GO categories	as it sets an extremely permissive
% threshold to detect redundancies (c=0.10) and fill the 'representative' column	while normally c>=0.4 is recommended.
% To export a reduced-redundancy set of GO terms	go to the Scatterplot & Table tab	and export to CSV from there.
TermID	Name	Frequency	Value	Uniqueness	Dispensability	Representative
GO:0042470	"melanosome"	0.0325476	-2.26508	0.79573	0	"melanosome"
GO:0048770	"pigment granule"	0.0326376	-2.26508	0.79573	0.539753	"melanosome"
GO:0034703	"cation channel complex"	0.183379	-2.12278	0.399605	1.93e-05	"cation channel complex"
GO:1990351	"transporter complex"	1.37302	-1.4734	0.595694	0.349732	"cation channel complex"
GO:0034702	"ion channel complex"	0.25198	-1.86656	0.390698	0.692507	"cation channel complex"

## Sheet: N1N7_MF
% WARNING - This exported Revigo data is only useful for the specific purpose of constructing a TreeMap visualization.
% Do not use this table as a general list of non-redundant GO categories	as it sets an extremely permissive
% threshold to detect redundancies (c=0.10) and fill the 'representative' column	while normally c>=0.4 is recommended.
% To export a reduced-redundancy set of GO terms	go to the Scatterplot & Table tab	and export to CSV from there.
TermID	Name	Frequency	Value	Uniqueness	Dispensability	Representative
GO:0022843	"voltage-gated cation channel activity"	0.155301	-2.81943	0.0107998	0	"voltage-gated cation channel activity"

## Sheet: N7&N1_CC
% WARNING - This exported Revigo data is only useful for the specific purpose of constructing a TreeMap visualization.
% Do not use this table as a general list of non-redundant GO categories	as it sets an extremely permissive
% threshold to detect redundancies (c=0.10) and fill the 'representative' column	while normally c>=0.4 is recommended.
% To export a reduced-redundancy set of GO terms	go to the Scatterplot & Table tab	and export to CSV from there.
TermID	Name	Frequency	Value	Uniqueness	Dispensability	Representative
GO:0030054	"cell junction"	0.850077	-1.34348	1	0	"cell junction"
GO:0070161	"anchoring junction"	0.310499	-1.37367	1	2.63e-05	"anchoring junction"

## Sheet: N7&N1_MF
% WARNING - This exported Revigo data is only useful for the specific purpose of constructing a TreeMap visualization.
% Do not use this table as a general list of non-redundant GO categories	as it sets an extremely permissive
% threshold to detect redundancies (c=0.10) and fill the 'representative' column	while normally c>=0.4 is recommended.
% To export a reduced-redundancy set of GO terms	go to the Scatterplot & Table tab	and export to CSV from there.
TermID	Name	Frequency	Value	Uniqueness	Dispensability	Representative
GO:0005515	"protein binding"	4.55675	-1.99433	1	0	"protein binding"
GO:0015079	"potassium ion transmembrane transporter activity"	0.3225	-2.25905	0.192659	0	"potassium ion transmembrane transporter activity"
GO:0022843	"voltage-gated cation channel activity"	0.155301	-2.1339	0.102886	0.618447	"potassium ion transmembrane transporter activity"

[truncated: 13 more sheets: N7Y7_BP, N7Y7_MF, Y7N7_BP, Y7N7_CC, Y7N7_MF, N7&Y7_CC, N7&Y7_MF, N7Y1_BP, N7Y1_CC, N7Y1_MF, N7&Y1_BP, N7&Y1_CC, N7&Y1_MF]
