# Supplementary material for: Dehydration Alters Transcript Levels in the Mosquito Midgut, Likely Facilitating Rapid Rehydration following a Bloodmeal
Source: Insects. 2023 Mar 9;14(3):274. doi: 10.3390/insects14030274 (PMC10056721; doi:10.3390/insects14030274)
Supplement: Supplementary file 1 [file insects-14-00274-s001.zip › Supplementary_Table_S4.xlsx]

## Sheet: Y1_N1
source	term_name	term_id	adjusted_p_value	negative_log10_of_adjusted_p_value	term_size	query_size	intersection_size	effective_domain_size	intersections
GO:BP	proteolysis	GO:0006508	0.0122725	1.91107	784	75	22	6660	AAEL001690-RA,AAEL009764-RB,AAEL007765-RE,AAEL007432-RA,AAEL006434-RB,AAEL015247-RC,AAEL012575-RA,AAEL010782-RA,AAEL007796-RA,AAEL000420-RB,AAEL011624-RB,AAEL002978-RD,AAEL023729-RA,AAEL013715-RA,AAEL010202-RA,AAEL008364-RB,AAEL013712-RA,AAEL007601-RA,AAEL010196-RA,AAEL001674-RA,AAEL008769-RA,AAEL001693-RA
GO:MF	serine-type endopeptidase activity	GO:0004252	0.00284497	2.54592	347	98	14	9275	AAEL001690-RA,AAEL007432-RA,AAEL006434-RB,AAEL007796-RA,AAEL011624-RB,AAEL023729-RA,AAEL013715-RA,AAEL010202-RA,AAEL013712-RA,AAEL007601-RA,AAEL010196-RA,AAEL001674-RA,AAEL008769-RA,AAEL001693-RA
GO:MF	peptidase activity	GO:0008233	0.00360166	2.4435	673	98	20	9275	AAEL001690-RA,AAEL009764-RB,AAEL007432-RA,AAEL006434-RB,AAEL015247-RC,AAEL012575-RA,AAEL010782-RA,AAEL007796-RA,AAEL000420-RB,AAEL011624-RB,AAEL002978-RD,AAEL023729-RA,AAEL013715-RA,AAEL010202-RA,AAEL013712-RA,AAEL007601-RA,AAEL010196-RA,AAEL001674-RA,AAEL008769-RA,AAEL001693-RA
GO:MF	serine hydrolase activity	GO:0017171	0.00599748	2.22203	371	98	14	9275	AAEL001690-RA,AAEL007432-RA,AAEL006434-RB,AAEL007796-RA,AAEL011624-RB,AAEL023729-RA,AAEL013715-RA,AAEL010202-RA,AAEL013712-RA,AAEL007601-RA,AAEL010196-RA,AAEL001674-RA,AAEL008769-RA,AAEL001693-RA
GO:MF	serine-type peptidase activity	GO:0008236	0.00599748	2.22203	371	98	14	9275	AAEL001690-RA,AAEL007432-RA,AAEL006434-RB,AAEL007796-RA,AAEL011624-RB,AAEL023729-RA,AAEL013715-RA,AAEL010202-RA,AAEL013712-RA,AAEL007601-RA,AAEL010196-RA,AAEL001674-RA,AAEL008769-RA,AAEL001693-RA
GO:MF	catalytic activity	GO:0003824	0.00805206	2.09409	3721	98	59	9275	AAEL011254-RE,AAEL006973-RA,AAEL010932-RC,AAEL001690-RA,AAEL009764-RB,AAEL004688-RB,AAEL006381-RA,AAEL002636-RA,AAEL007432-RA,AAEL013492-RA,AAEL013128-RI,AAEL001887-RD,AAEL004341-RA,AAEL006434-RB,AAEL006642-RA,AAEL007296-RB,AAEL012864-RA,AAEL003873-RC,AAEL015247-RC,AAEL012575-RA,AAEL019845-RC,AAEL010782-RA,AAEL007796-RA,AAEL004025-RD,AAEL005003-RD,AAEL000420-RB,AAEL010893-RC,AAEL005651-RB,AAEL005…
GO:MF	hydrolase activity	GO:0016787	0.0234351	1.63013	1589	98	32	9275	AAEL011254-RE,AAEL010932-RC,AAEL001690-RA,AAEL009764-RB,AAEL006381-RA,AAEL002636-RA,AAEL007432-RA,AAEL004341-RA,AAEL006434-RB,AAEL006642-RA,AAEL015247-RC,AAEL012575-RA,AAEL010782-RA,AAEL007796-RA,AAEL000420-RB,AAEL004277-RC,AAEL015298-RE,AAEL013229-RA,AAEL011624-RB,AAEL002978-RD,AAEL023729-RA,AAEL013715-RA,AAEL010202-RA,AAEL009438-RA,AAEL013712-RA,AAEL007601-RA,AAEL010196-RA,AAEL007030-RD,AAEL001…

## Sheet: N1_Y1
source	term_name	term_id	adjusted_p_value	negative_log10_of_adjusted_p_value	term_size	query_size	intersection_size	effective_domain_size	intersections
GO:BP	regulation of biological process	GO:0050789	0.0195024	1.70991	1537	82	35	6660	AAEL007120-RD,AAEL008190-RA,AAEL019881-RA,AAEL007189-RB,AAEL009615-RA,AAEL013535-RA,AAEL002321-RC,AAEL009171-RA,AAEL008928-RE,AAEL013770-RB,AAEL001864-RA,AAEL013102-RH,AAEL004986-RA,AAEL019654-RH,AAEL006886-RB,AAEL004715-RA,AAEL003116-RA,AAEL011280-RC,AAEL027111-RD,AAEL022462-RA,AAEL003646-RD,AAEL017445-RD,AAEL025216-RD,AAEL019732-RB,AAEL022196-RA,AAEL009265-RC,AAEL001304-RC,AAEL023932-RA,AAEL009…
GO:BP	biological regulation	GO:0065007	0.0400954	1.39691	1657	82	36	6660	AAEL007120-RD,AAEL008190-RA,AAEL019881-RA,AAEL007189-RB,AAEL009615-RA,AAEL013535-RA,AAEL002321-RC,AAEL009171-RA,AAEL008928-RE,AAEL013770-RB,AAEL001864-RA,AAEL013102-RH,AAEL004986-RA,AAEL019654-RH,AAEL006886-RB,AAEL004715-RA,AAEL003116-RA,AAEL025591-RA,AAEL011280-RC,AAEL027111-RD,AAEL022462-RA,AAEL003646-RD,AAEL017445-RD,AAEL025216-RD,AAEL019732-RB,AAEL022196-RA,AAEL009265-RC,AAEL001304-RC,AAEL023…
GO:MF	phosphatidylinositol-4,5-bisphosphate 4-phosphatase activity	GO:0034597	0.0471815	1.32623	2	119	2	9275	AAEL021471-RC,AAEL011216-RD

## Sheet: Y1&N1
source	term_name	term_id	adjusted_p_value	negative_log10_of_adjusted_p_value	term_size	query_size	intersection_size	effective_domain_size	intersections
KEGG	Glycerophospholipid metabolism	KEGG:00564	0.0461441	1.33588	71	78	7	3208	AAEL004341-RA,AAEL003873-RC,AAEL005651-RB,AAEL012743-RA,AAEL006667-RD,AAEL008853-RE,AAEL011898-RK

## Sheet: N7_N1
source	term_name	term_id	adjusted_p_value	negative_log10_of_adjusted_p_value	term_size	query_size	intersection_size	effective_domain_size	intersections
GO:CC	cell junction	GO:0030054	0.00509951	2.29247	71	62	6	6427	AAEL004559-RC,AAEL002887-RG,AAEL024235-RD,AAEL027483-RG,AAEL019826-RF,AAEL022373-RB
GO:CC	anchoring junction	GO:0070161	0.00922074	2.03523	26	62	4	6427	AAEL002887-RG,AAEL024235-RD,AAEL019826-RF,AAEL022373-RB
GO:CC	focal adhesion	GO:0005925	0.0251392	1.59965	3	62	2	6427	AAEL024235-RD,AAEL019826-RF
GO:CC	cell-substrate junction	GO:0030055	0.0251392	1.59965	3	62	2	6427	AAEL024235-RD,AAEL019826-RF

## Sheet: N1_N7
source	term_name	term_id	adjusted_p_value	negative_log10_of_adjusted_p_value	term_size	query_size	intersection_size	effective_domain_size	intersections
GO:BP	protein secretion	GO:0009306	0.0166697	1.77807	2	46	2	6660	AAEL026991-RB,AAEL027089-RC
GO:BP	establishment of protein localization to extracellular region	GO:0035592	0.0166697	1.77807	2	46	2	6660	AAEL026991-RB,AAEL027089-RC
GO:BP	protein localization to extracellular region	GO:0071692	0.0166697	1.77807	2	46	2	6660	AAEL026991-RB,AAEL027089-RC
GO:CC	melanosome	GO:0042470	0.00543156	2.26508	3	31	2	6427	AAEL026991-RB,AAEL027089-RC
GO:CC	pigment granule	GO:0048770	0.00543156	2.26508	3	31	2	6427	AAEL026991-RB,AAEL027089-RC
GO:CC	cation channel complex	GO:0034703	0.00753745	2.12278	19	31	3	6427	AAEL007143-RB,AAEL011280-RC,AAEL018234-RD
GO:CC	ion channel complex	GO:0034702	0.0135969	1.86656	23	31	3	6427	AAEL007143-RB,AAEL011280-RC,AAEL018234-RD
GO:CC	transmembrane transporter complex	GO:1902495	0.0304661	1.51618	30	31	3	6427	AAEL007143-RB,AAEL011280-RC,AAEL018234-RD
GO:CC	transporter complex	GO:1990351	0.0336203	1.4734	31	31	3	6427	AAEL007143-RB,AAEL011280-RC,AAEL018234-RD
GO:MF	voltage-gated cation channel activity	GO:0022843	0.00151555	2.81943	24	54	4	9275	AAEL007143-RB,AAEL011280-RC,AAEL018234-RD,AAEL008056-RI
GO:MF	voltage-gated ion channel activity	GO:0005244	0.00712185	2.14741	35	54	4	9275	AAEL007143-RB,AAEL011280-RC,AAEL018234-RD,AAEL008056-RI
GO:MF	voltage-gated channel activity	GO:0022832	0.00712185	2.14741	35	54	4	9275	AAEL007143-RB,AAEL011280-RC,AAEL018234-RD,AAEL008056-RI
GO:MF	voltage-gated potassium channel activity	GO:0005249	0.0216833	1.66388	18	54	3	9275	AAEL007143-RB,AAEL018234-RD,AAEL008056-RI

## Sheet: N7&N1
source	term_name	term_id	adjusted_p_value	negative_log10_of_adjusted_p_value	term_size	query_size	intersection_size	effective_domain_size	intersections
GO:CC	anchoring junction	GO:0070161	0.0422991	1.37367	26	92	4	6427	AAEL002887-RG,AAEL024235-RD,AAEL019826-RF,AAEL022373-RB
GO:CC	cell junction	GO:0030054	0.0453438	1.34348	71	92	6	6427	AAEL004559-RC,AAEL002887-RG,AAEL024235-RD,AAEL027483-RG,AAEL019826-RF,AAEL022373-RB
GO:MF	potassium ion transmembrane transporter activity	GO:0015079	0.00550738	2.25905	37	156	6	9275	AAEL012062-RI,AAEL008928-RF,AAEL019673-RB,AAEL007143-RB,AAEL018234-RD,AAEL008056-RI
GO:MF	voltage-gated cation channel activity	GO:0022843	0.00734683	2.1339	24	156	5	9275	AAEL008928-RF,AAEL007143-RB,AAEL011280-RC,AAEL018234-RD,AAEL008056-RI
GO:MF	protein binding	GO:0005515	0.0101314	1.99433	2312	156	61	9275	AAEL004480-RG,AAEL011254-RE,AAEL019737-RD,AAEL006973-RA,AAEL006436-RF,AAEL012412-RA,AAEL002877-RC,AAEL011142-RF,AAEL012911-RB,AAEL002887-RG,AAEL004083-RB,AAEL019495-RD,AAEL024532-RD,AAEL005221-RF,AAEL020000-RA,AAEL024235-RD,AAEL008234-RF,AAEL013466-RG,AAEL021092-RI,AAEL025570-RE,AAEL000845-RH,AAEL009173-RI,AAEL028110-RA,AAEL027514-RA,AAEL027402-RC,AAEL013275-RE,AAEL019424-RAC,AAEL018700-RI,AAEL00…
GO:MF	potassium channel activity	GO:0005267	0.0312271	1.50547	32	156	5	9275	AAEL008928-RF,AAEL019673-RB,AAEL007143-RB,AAEL018234-RD,AAEL008056-RI
GO:MF	voltage-gated potassium channel activity	GO:0005249	0.0347623	1.45889	18	156	4	9275	AAEL008928-RF,AAEL007143-RB,AAEL018234-RD,AAEL008056-RI
GO:MF	voltage-gated channel activity	GO:0022832	0.0483357	1.31573	35	156	5	9275	AAEL008928-RF,AAEL007143-RB,AAEL011280-RC,AAEL018234-RD,AAEL008056-RI
GO:MF	voltage-gated ion channel activity	GO:0005244	0.0483357	1.31573	35	156	5	9275	AAEL008928-RF,AAEL007143-RB,AAEL011280-RC,AAEL018234-RD,AAEL008056-RI
KEGG	Hippo signaling pathway - fly	KEGG:04391	0.0264686	1.57727	53	47	5	3208	AAEL019737-RD,AAEL019424-RAC,AAEL022373-RB,AAEL019700-RH,AAEL007658-RO
KEGG	Endocytosis	KEGG:04144	0.0469952	1.32795	121	47	7	3208	AAEL021711-RE,AAEL009088-RH,AAEL007658-RO,AAEL019654-RH,AAEL008542-RD,AAEL020265-RE,AAEL003106-RB

## Sheet: Y7_Y1
source	term_name	term_id	adjusted_p_value	negative_log10_of_adjusted_p_value	term_size	query_size	intersection_size	effective_domain_size	intersections

## Sheet: Y1_Y7
source	term_name	term_id	adjusted_p_value	negative_log10_of_adjusted_p_value	term_size	query_size	intersection_size	effective_domain_size	intersections

## Sheet: Y7&Y1
source	term_name	term_id	adjusted_p_value	negative_log10_of_adjusted_p_value	term_size	query_size	intersection_size	effective_domain_size	intersections

## Sheet: N7_Y7
source	term_name	term_id	adjusted_p_value	negative_log10_of_adjusted_p_value	term_size	query_size	intersection_size	effective_domain_size	intersections
GO:BP	biological regulation	GO:0065007	0.0180152	1.74436	1657	175	67	6660	AAEL002343-RB,AAEL001796-RC,AAEL009645-RC,AAEL019939-RP,AAEL004193-RD,AAEL028092-RB,AAEL009742-RE,AAEL006711-RG,AAEL005147-RB,AAEL020559-RG,AAEL024141-RD,AAEL013770-RB,AAEL001864-RA,AAEL002999-RB,AAEL012150-RB,AAEL012583-RE,AAEL008141-RD,AAEL006510-RB,AAEL004986-RA,AAEL004715-RA,AAEL004351-RG,AAEL004319-RC,AAEL010224-RB,AAEL001321-RB,AAEL011592-RB,AAEL022282-RD,AAEL008234-RF,AAEL013466-RG,AAEL021…
GO:MF	binding	GO:0005488	0.0019846	2.70233	6367	236	191	9275	AAEL009131-RA,AAEL002390-RA,AAEL001421-RA,AAEL002343-RB,AAEL001796-RC,AAEL015255-RL,AAEL008262-RB,AAEL012062-RI,AAEL019939-RP,AAEL002428-RE,AAEL004193-RD,AAEL013492-RA,AAEL003605-RA,AAEL006973-RA,AAEL028092-RB,AAEL007450-RA,AAEL000185-RD,AAEL000193-RE,AAEL006436-RF,AAEL021303-RA,AAEL009742-RE,AAEL001647-RE,AAEL005147-RB,AAEL004791-RD,AAEL008574-RA,AAEL020559-RG,AAEL009874-RO,AAEL018334-RE,AAEL013…
GO:MF	actin filament binding	GO:0051015	0.00219147	2.65927	22	236	6	9275	AAEL019939-RP,AAEL006095-RA,AAEL001220-RC,AAEL024235-RD,AAEL022058-RB,AAEL024528-RI
GO:MF	transcription regulator activity	GO:0140110	0.00623996	2.20482	309	236	21	9275	AAEL001796-RC,AAEL009645-RC,AAEL009742-RE,AAEL005147-RB,AAEL020559-RG,AAEL024141-RD,AAEL013770-RB,AAEL012150-RB,AAEL008141-RD,AAEL010224-RB,AAEL001321-RB,AAEL021092-RI,AAEL008190-RA,AAEL007595-RD,AAEL009171-RA,AAEL001119-RC,AAEL008260-RD,AAEL017445-RD,AAEL009265-RC,AAEL007120-RD,AAEL008953-RG
GO:MF	actin binding	GO:0003779	0.00652818	2.18521	99	236	11	9275	AAEL019939-RP,AAEL006095-RA,AAEL001220-RC,AAEL011905-RB,AAEL024235-RD,AAEL022058-RB,AAEL009991-RD,AAEL024528-RI,AAEL005845-RB,AAEL025570-RA,AAEL022373-RB
GO:MF	protein binding	GO:0005515	0.0130676	1.88381	2312	236	85	9275	AAEL002343-RB,AAEL008262-RB,AAEL019939-RP,AAEL002428-RE,AAEL004193-RD,AAEL006973-RA,AAEL000185-RD,AAEL000193-RE,AAEL006436-RF,AAEL001647-RE,AAEL000362-RE,AAEL013770-RB,AAEL006095-RA,AAEL020264-RD,AAEL001473-RE,AAEL001864-RA,AAEL019495-RD,AAEL008032-RA,AAEL027514-RB,AAEL025391-RC,AAEL012634-RB,AAEL007804-RB,AAEL006510-RB,AAEL004986-RA,AAEL019827-RC,AAEL008398-RG,AAEL013275-RC,AAEL007658-RT,AAEL001…
GO:MF	DNA-binding transcription factor activity	GO:0003700	0.0197299	1.70487	262	236	18	9275	AAEL001796-RC,AAEL009645-RC,AAEL009742-RE,AAEL005147-RB,AAEL020559-RG,AAEL013770-RB,AAEL012150-RB,AAEL008141-RD,AAEL010224-RB,AAEL001321-RB,AAEL008190-RA,AAEL007595-RD,AAEL009171-RA,AAEL001119-RC,AAEL008260-RD,AAEL017445-RD,AAEL007120-RD,AAEL008953-RG
GO:MF	cytoskeletal protein binding	GO:0008092	0.0394752	1.40368	162	236	13	9275	AAEL019939-RP,AAEL006095-RA,AAEL019827-RC,AAEL001220-RC,AAEL011905-RB,AAEL024235-RD,AAEL022058-RB,AAEL009991-RD,AAEL024528-RI,AAEL005845-RB,AAEL018214-RD,AAEL025570-RA,AAEL022373-RB

[truncated: 8 more sheets: Y7_N7, N7&Y7, N7_Y1, Y1_N7, N7&Y1, N1_Y7, Y7_N1, N1&Y7]
