# Supplementary material for: Dehydration Alters Transcript Levels in the Mosquito Midgut, Likely Facilitating Rapid Rehydration following a Bloodmeal
Source: Insects. 2023 Mar 9;14(3):274. doi: 10.3390/insects14030274 (PMC10056721; doi:10.3390/insects14030274)
Supplement: Supplementary file 1 [file insects-14-00274-s001.zip › Supplementary_Table_S5.xlsx]

## Sheet: SailfishN1
Name	M1N2	M1N3	N1 Average
AAEL000016-RA	12.6089	23.0999	17.8544
AAEL000024-RA	0	0	0
AAEL000024-RB	0	0	0
AAEL000024-RC	0	0.118063	0.0590315
AAEL000029-RB	0	0	0
AAEL000064-RA	0	5.78163	2.89081
AAEL000079-RB	0.0512171	2.27613	1.16367
AAEL000079-RC	0.0342621	4.65567	2.34497
AAEL000079-RD	0	1.56127	0.780635
AAEL000084-RA	36.2867	33.3627	34.8247
AAEL000084-RB	0	5.56555	2.78277
AAEL000101-RA	2.29038	2.57826	2.43432
AAEL000102-RB	44.3603	43.5717	43.966
AAEL000106-RA	2.36992	3.74736	3.05864
AAEL000107-RA	1.04342	4.88592	2.96467
AAEL000108-RA	0	0.137957	0.0689785
AAEL000109-RA	0	6.77147	3.38573
AAEL000111-RA	0.151568	3.1457	1.64863
AAEL000113-RA	0	0.0732663	0.0366332
AAEL000115-RA	9.2289	24.4328	16.8308
AAEL000116-RB	0.469524	2.30775	1.38864
AAEL000118-RA	3.67418	7.30871	5.49144
AAEL000119-RA	1.87056	1.7565	1.81353
AAEL000122-RA	1.00806	2.47167	1.73986
AAEL000122-RB	1.03364	7.25761	4.14562
AAEL000123-RA	0	0.0415744	0.0207872
AAEL000127-RA	1.31776	2.75984	2.0388
AAEL000127-RB	0.749222	0	0.374611
AAEL000134-RA	0.185414	0.322903	0.254159
AAEL000137-RB	0	0.187091	0.0935455
AAEL000137-RC	0	0.184277	0.0921385
AAEL000137-RD	0.546562	0.971543	0.759053
AAEL000137-RE	0	0	0
AAEL000137-RF	0	0	0
AAEL000138-RA	98.3022	99.443	98.8726
AAEL000140-RA	2.51862	5.23259	3.87561
AAEL000140-RB	0	0.786415	0.393207
AAEL000143-RA	11.0089	15.7921	13.4005
AAEL000146-RA	8.48867	7.73928	8.11397
AAEL000147-RA	7.52668	13.7151	10.6209
AAEL000148-RA	1.02164	1.81697	1.41931
AAEL000149-RA	2.93095	11.0436	6.98728
AAEL000154-RA	0.0582045	2.10186	1.08003
AAEL000157-RA	1.08334	7.27845	4.1809
AAEL000219-RA	44.1515	61.7934	52.9724
AAEL000223-RA	41.4926	40.0869	40.7897
AAEL000229-RA	0	0.738831	0.369416
AAEL000230-RA	11.4707	10.4502	10.9605
AAEL000231-RA	15.3886	22.0459	18.7172
AAEL000239-RB	0.0326677	0.147986	0.0903269
AAEL000241-RA	5.14341	8.60181	6.87261
AAEL000242-RA	6.3e-06	0.0123459	0.0061761
AAEL000242-RB	3.72e-08	0	1.86e-08
AAEL000242-RC	7.36e-08	0	3.68e-08
AAEL000242-RD	0.273939	0	0.136969
AAEL000242-RE	0	5.16526	2.58263
AAEL000242-RF	2.23e-08	0.33609	0.168045
AAEL000243-RB	0.0428775	0.0509194	0.0468984
AAEL000244-RA	49.0214	43.5028	46.2621
AAEL000247-RA	0	0.00814985	0.00407493
AAEL000247-RB	0	0.180916	0.090458
AAEL000249-RA	0	0	0
AAEL000249-RB	0	0.135349	0.0676745
AAEL000249-RC	0	0	0
AAEL000249-RD	0.169789	0	0.0848945
AAEL000249-RE	0	0	0
AAEL000250-RB	0	0	0
AAEL000250-RC	0	0.0285892	0.0142946
AAEL000250-RD	0	0	0
AAEL000250-RE	0	0	0
AAEL000250-RF	0	0	0
AAEL000251-RA	0	0.0297492	0.0148746
AAEL000252-RA	0.197253	0.0432045	0.120229
AAEL000254-RB	7.6e-05	0.000285822	0.000180911
AAEL000254-RC	0	0	0
AAEL000254-RD	0.018516	0.0819821	0.0502491
AAEL000384-RB	0	0	0
AAEL000609-RA	0	0.099878	0.049939
AAEL000626-RA	0	0.189075	0.0945375
AAEL000626-RB	25.6102	27.1596	26.3849
AAEL000626-RC	0	0.18879	0.094395
AAEL000626-RD	12.2973	22.1779	17.2376
AAEL000980-RA	0.683449	0.992996	0.838222
AAEL000980-RB	0.0731609	1.73823	0.905695
AAEL000982-RA	9.88738	10.6831	10.2852
AAEL000983-RA	2.45576	2.86604	2.6609
AAEL000983-RB	0	0.121279	0.0606395
AAEL000983-RE	0	0.122436	0.061218
AAEL000983-RF	6.17937	6.96753	6.57345
AAEL000983-RG	0	0	0
AAEL000983-RH	0.128239	0.517751	0.322995
AAEL000997-RB	0.0691655	0	0.0345828
AAEL001005-RA	200.683	257.316	228.999
AAEL001008-RA	4.20088	4.28676	4.24382
AAEL001009-RB	0.612932	14.208	7.41047
AAEL001054-RB	0.370783	0.70271	0.536747
AAEL001059-RA	0.451527	0.0833306	0.267429
AAEL001060-RA	0.0398128	0.043269	0.0415409
AAEL001060-RB	0	0	0
AAEL001060-RC	0	0.102682	0.051341
AAEL001061-RA	0	0.0356838	0.0178419
AAEL001061-RB	18.6626	79.2456	48.9541
AAEL001061-RC	2.18435	20.3373	11.2608
AAEL001062-RB	5.38381	3.8495	4.61665
AAEL001063-RA	0	0	0
AAEL001065-RA	18.0018	13.5202	15.761
AAEL001067-RA	0	0.303466	0.151733
AAEL001068-RA	0.0936806	0.189456	0.141568
AAEL001071-RA	2.84846	2.62797	2.73822
AAEL001073-RA	0	0.0131235	0.00656175
AAEL001074-RB	0	0.542637	0.271319
AAEL001074-RC	0.0440895	0.0508092	0.0474494
AAEL001074-RD	0	0.908445	0.454222
AAEL001077-RA	0.347547	0.421593	0.38457
AAEL001080-RA	10.9852	9.99406	10.4896
AAEL001082-RA	1.41991	2.99362	2.20676
AAEL001084-RA	0	0.176506	0.088253
AAEL001085-RA	8.53873	0	4.26936
AAEL001086-RB	1.18388	6.60744	3.89566
AAEL001087-RB	1.40798	2.43481	1.92139
AAEL001088-RB	0	0.24085	0.120425
AAEL001088-RC	3.18948	5.8705	4.52999
AAEL001089-RA	13.7634	24.0672	18.9153
AAEL001090-RA	0	1.68782	0.84391
AAEL001091-RA	11.127	7.99699	9.56199
AAEL001092-RA	56.7077	52.4477	54.5777
AAEL001094-RA	4.59849	6.96478	5.78163
AAEL001094-RB	7.6863	7.88114	7.78372
AAEL001094-RC	0	1.35676	0.67838
AAEL001094-RD	2.2187	3.92e-09	1.10935
AAEL001095-RA	0.108766	0.545871	0.327319
AAEL001098-RA	1.19856	1.0434	1.12098
AAEL001099-RA	3.51176	9.61905	6.56541
AAEL001099-RB	0	0	0
AAEL001099-RC	0	0	0
AAEL001228-RA	0	0.0195357	0.00976785
AAEL001228-RB	0	0.00726191	0.00363095
AAEL001229-RA	0	0	0
AAEL001231-RB	0	0	0
AAEL001231-RC	0	0	0
AAEL001231-RD	0	0	0
AAEL001231-RE	0	0	0
AAEL001231-RF	0	0	0
AAEL001231-RG	0	0	0
AAEL001231-RH	0	0.0455597	0.0227799
AAEL001231-RI	0	0	0
AAEL001231-RJ	0	0	0
AAEL001236-RA	12.5492	14.8498	13.6995
AAEL001290-RA	0	0.0219112	0.0109556
AAEL001319-RB	0	0.10571	0.052855
AAEL001351-RA	0.691373	3.23071	1.96104
AAEL001427-RA	9.74889	10.3381	10.0435
AAEL001433-RB	0	0.325936	0.162968
AAEL001433-RC	0.338054	0.414274	0.376164
AAEL001433-RD	0.290406	0.299914	0.29516
AAEL001439-RA	24.0417	31.4378	27.7398
AAEL001442-RB	0.114706	0.130003	0.122355
AAEL001442-RC	4.57e-11	3.64e-06	1.82002e-06
AAEL001442-RD	0	0	0
AAEL001442-RE	4.47e-06	0	2.235e-06
AAEL001442-RF	1.91e-10	0.321478	0.160739
AAEL001442-RG	0	0.00846354	0.00423177
AAEL001446-RB	0	0	0
AAEL001446-RC	0	0.595003	0.297501
AAEL001446-RD	3.20932	2.70848	2.9589
AAEL001446-RE	0	0	0
AAEL001446-RF	0.967063	0	0.483532
AAEL001446-RG	0	0	0
AAEL001446-RH	4.0276	3.65e-07	2.0138
AAEL001446-RI	0	5.49698	2.74849
AAEL001447-RA	0	0.225551	0.112776
AAEL001447-RB	0	0	0
AAEL001447-RC	0	0	0
AAEL001447-RD	0.383784	0.504066	0.443925
AAEL001447-RE	0	0.0607702	0.0303851
AAEL001447-RF	0	0	0
AAEL001447-RG	0	0.0357476	0.0178738
AAEL001447-RH	1.33712	5.23352	3.28532
AAEL001447-RI	1.46e-05	0.6625	0.331257
AAEL001448-RA	4.22581	3.10692	3.66636
AAEL001448-RB	0.242653	1.21948	0.731066
AAEL001448-RC	0	0	0
AAEL001448-RD	5.4316	4.22393	4.82777
AAEL001448-RE	1.0656	1.55052	1.30806
AAEL001448-RF	0	2.11406	1.05703
AAEL001448-RG	0	0	0
AAEL001448-RH	0	0.821547	0.410774
AAEL001448-RI	0.784923	7.44228	4.1136
AAEL001449-RA	0.145139	2.05734	1.10124
AAEL001449-RB	0	0	0
AAEL001451-RA	3.21379	5.04779	4.13079
AAEL001457-RA	0	0.0316577	0.0158288
AAEL001459-RA	1.02e-10	0	5.1e-11
AAEL001459-RB	0.325295	0.463776	0.394536
AAEL001461-RA	0	0.03231	0.016155
AAEL001464-RB	0.182013	0.0975144	0.139764
AAEL001464-RC	0.204808	0.283667	0.244237
AAEL001464-RD	0	0.113467	0.0567335
AAEL001464-RE	0.160056	0.788776	0.474416
AAEL001464-RF	0.146591	0.2892	0.217896
AAEL001597-RA	1.73211	1.84511	1.78861
AAEL001600-RA	0	0	0
AAEL001600-RB	0	1.0656	0.5328
AAEL001600-RC	1.17887	2.13855	1.65871
AAEL001601-RA	2.88742	6.83473	4.86108
AAEL001601-RB	3.93286	1.28994	2.6114
AAEL001601-RC	0	0.59536	0.29768
AAEL001601-RD	2.88742	6.83473	4.86108
AAEL001604-RB	0	0	0
AAEL001604-RC	1.33035	3.0149	2.17263
AAEL001607-RA	0	1.31298	0.65649
AAEL001607-RB	21.3158	10.5683	15.9421
AAEL001610-RA	2.26773	2.431	2.34936
AAEL001612-RA	0.291721	0.635964	0.463842
AAEL001615-RA	16.8251	36.1215	26.4733
AAEL001616-RA	0.469192	2.9954	1.7323
AAEL001616-RB	0.0739177	0.429281	0.251599
AAEL001616-RC	2.45961	2.24329	2.35145
AAEL001619-RA	8.28336	17.6547	12.969
AAEL001622-RA	8.28489	10.8711	9.578
AAEL001622-RB	1.34839	4.01311	2.68075
AAEL001623-RA	150.082	165.059	157.57
AAEL001624-RA	1.28989	2.94374	2.11681
AAEL001625-RA	0	0.14081	0.070405
AAEL001626-RA	4.91708	8.87855	6.89782
AAEL001627-RA	7.00967	5.30928	6.15948
AAEL001628-RA	0.207828	0.367662	0.287745
AAEL001631-RA	0.780394	3.65089	2.21564
AAEL002047-RA	2109.48	2432.35	2270.91
AAEL002048-RA	12.7265	14.5681	13.6473
AAEL002048-RB	2.96908	4.15168	3.56038
AAEL002072-RA	0	0.0174869	0.00874345
AAEL002077-RA	39.9405	44.0693	42.0049
AAEL002078-RA	7.75083	10.8297	9.29026
AAEL002084-RB	6.99987	19.2024	13.1011
AAEL002135-RA	6.50653	11.9276	9.21706
AAEL002137-RD	28.3866	27.7635	28.0751
AAEL002139-RA	6.75226	9.56062	8.15644
AAEL002140-RA	42.7419	49.1066	45.9243
AAEL002141-RA	0	0.0748144	0.0374072
AAEL002142-RA	0.831118	9.20761	5.01936
AAEL002145-RA	3.46523	3.74187	3.60355
AAEL002145-RB	2.0684	7.45564	4.76202
AAEL002148-RA	13.035	10.6885	11.8618
AAEL002152-RA	4.66947	11.25	7.95974
AAEL002153-RA	0	0.0519787	0.0259894
AAEL002155-RA	22.4913	30.6276	26.5594
AAEL002157-RA	3.56487	8.38445	5.97466
AAEL002157-RB	1.49419	2.14135	1.81777
AAEL002158-RA	330.008	323.807	326.908
AAEL002159-RA	3.15228	6.88586	5.01907
AAEL002160-RA	151.392	145.705	148.548
AAEL002161-RA	35.7357	46.59	41.1629
AAEL002163-RA	34.553	33.8194	34.1862
AAEL002165-RA	15.6358	27.648	21.6419
AAEL002167-RA	0	0	0
AAEL002169-RB	2.23602	8.49679	5.36641
AAEL002170-RA	29.1045	30.0675	29.586
AAEL002170-RB	0	0	0
AAEL002173-RB	0	0.061695	0.0308475
AAEL002174-RA	39.7016	41.7327	40.7172
AAEL002175-RA	19.607	22.9133	21.2601
AAEL002176-RB	5.33172	4.21168	4.7717
AAEL002177-RA	0	0	0
AAEL002178-RB	3.07e-07	0.229108	0.114554
AAEL002178-RC	4.06017	6.84274	5.45146
AAEL002178-RD	14.52	26.0185	20.2692
AAEL002211-RA	0	0	0
AAEL002287-RB	0.4693	2.84435	1.65682
AAEL002287-RC	5.87933	4.05781	4.96857
AAEL002287-RD	0.000947228	3.01844	1.50969
AAEL002321-RA	0.0283236	0.689591	0.358957
AAEL002321-RB	1.34e-06	0	6.7e-07
AAEL002321-RC	0.670129	0	0.335064
AAEL002331-RA	11.3617	12.3614	11.8616
AAEL002335-RB	0	0	0
AAEL002335-RC	0.98325	1.0282	1.00572
AAEL002343-RA	0	0.0980355	0.0490177
AAEL002343-RB	0.225682	0.137352	0.181517
AAEL002346-RC	2.35299	3.58595	2.96947
AAEL002346-RD	2.37487	3.25417	2.81452
AAEL002346-RE	1.49799	11.3431	6.42054
AAEL002348-RB	0.0572383	0.114792	0.0860151
AAEL002354-RB	0	0	0
AAEL002354-RC	0	0	0
AAEL002354-RD	0	0	0
AAEL002354-RE	0	0	0
AAEL002354-RF	0	0	0
AAEL002357-RA	0	0	0
AAEL002357-RB	2.44e-05	7.64e-05	5.04e-05
AAEL002357-RC	7.06e-05	1.71e-10	3.53001e-05
AAEL002357-RD	0	2.27e-10	1.135e-10
AAEL002357-RE	0.00967723	0.0424559	0.0260666
AAEL002357-RF	0.0144348	0.0647823	0.0396085
AAEL002357-RG	0.0208326	0.386407	0.20362
AAEL002357-RH	0	0	0
AAEL002357-RI	0.104711	0	0.0523555
AAEL002407-RB	17.8156	36.2466	27.0311
AAEL002408-RB	0.0444689	1.04802	0.546244
AAEL002410-RB	0	0.0136099	0.00680495
AAEL002410-RC	0	0.0207855	0.0103927
AAEL002411-RC	142.679	111.064	126.871
AAEL002411-RD	39.1252	64.4527	51.7889
AAEL002412-RA	1.28466	2.41205	1.84835
AAEL002413-RA	0	2.22496	1.11248
AAEL002415-RC	0	0	0
AAEL002415-RD	0	0.512056	0.256028
AAEL002415-RE	0	0.296805	0.148402
AAEL002415-RF	1.38237	2.38743	1.8849
AAEL002415-RG	0	0	0
AAEL002415-RH	0.619293	0	0.309646
AAEL002416-RA	17.4245	12.3469	14.8857
AAEL002416-RB	1.70526	7.5955	4.65038
AAEL002417-RA	0	0.231531	0.115765
AAEL002417-RB	13.9267	21.4541	17.6904
AAEL002417-RC	1.25147	0.29622	0.773845
AAEL002417-RD	2.66643	0.072063	1.36925
AAEL002417-RE	1.55815	0	0.779075
AAEL002417-RF	4.36914	9.76849	7.06881
AAEL002417-RG	0.567786	0.174449	0.371117
AAEL002417-RH	0.32847	0.926947	0.627709
AAEL002417-RI	0	0.00212178	0.00106089
AAEL002417-RJ	0	0.0130606	0.0065303
AAEL002417-RK	0	0.113872	0.056936
AAEL002417-RL	0	0.000962484	0.000481242
AAEL002417-RM	0	0.00608732	0.00304366
AAEL002417-RN	0	0	0
AAEL002417-RO	0	6.99e-09	3.495e-09
AAEL002417-RP	0	0.285917	0.142958
AAEL002418-RA	21.8904	25.1698	23.5301
AAEL002419-RA	3.44228	4.85981	4.15104
AAEL002422-RB	0	1.29915	0.649575
AAEL002422-RC	0	6.71063	3.35532
AAEL002422-RD	0	1.07436	0.53718
AAEL002422-RE	0	0.152693	0.0763465
AAEL002422-RF	0	1.70784	0.85392
AAEL002422-RG	0	8.95354	4.47677
AAEL002422-RH	0	0	0
AAEL002422-RI	0	4.88697	2.44348
AAEL002422-RJ	0	0.602656	0.301328
AAEL002422-RK	0	0.319863	0.159932
AAEL002422-RL	0	2.61692	1.30846
AAEL002422-RM	0	2.86838	1.43419
AAEL002422-RN	0	0.687879	0.34394
AAEL002422-RO	0	3.10957	1.55479
AAEL002422-RP	0	3.02171	1.51086
AAEL002423-RA	1.51731	2.19285	1.85508
AAEL002425-RA	0	0.0869799	0.0434899
AAEL002426-RA	16.9605	18.3454	17.653
AAEL002427-RB	1.14023	2.48379	1.81201
AAEL002428-RB	0.000111	0.919947	0.460029
AAEL002428-RC	8.30425	10.9295	9.61688
AAEL002428-RD	0	0.173327	0.0866635
AAEL002428-RE	0.481941	0.230763	0.356352
AAEL002430-RA	1.67315	6.42466	4.04891
AAEL002432-RA	0.0309719	0.472473	0.251722
AAEL002433-RA	4.30806	6.60082	5.45444
AAEL002435-RA	4.12544	4.95114	4.53829
AAEL002435-RB	1.40996	4.13019	2.77007
AAEL002435-RC	0.0387751	1.86259	0.950683
AAEL002435-RD	3.47301	1.27613	2.37457
AAEL002435-RE	12.7459	27.8568	20.3013
AAEL002435-RF	0	2.1697	1.08485
AAEL002436-RD	1.60779	4.58212	3.09495
AAEL002436-RE	4.92082	3.4997	4.21026
AAEL002436-RF	5.34059	4.86085	5.10072
AAEL002438-RB	0	0.195406	0.097703
AAEL002450-RA	3.38135	5.60486	4.4931
AAEL002451-RB	0.0213651	1.78421	0.902788
AAEL002453-RB	3.11852	3.45733	3.28792
AAEL002454-RA	0.338964	0.785437	0.5622
AAEL002455-RB	1.13779	2.5876	1.86269
AAEL002455-RC	1.07386	8.91557	4.99472
AAEL002455-RD	0	0.159052	0.079526
AAEL002499-RA	2.06239	2.02975	2.04607
AAEL002501-RA	45.1552	52.2788	48.717
AAEL002501-RB	24.5662	29.8344	27.2003
AAEL002502-RA	1.83245	2.97986	2.40616
AAEL002503-RA	7.34094	13.4472	10.3941
AAEL002504-RB	176.135	228.277	202.206
AAEL002506-RA	0.496407	0.789438	0.642922
AAEL002508-RA	36.8777	40.7772	38.8274
AAEL002510-RA	1.35308	0.374495	0.863788
AAEL002510-RB	37.04	26.572	31.806
AAEL002510-RC	0	0	0
AAEL002510-RD	20.036	28.7336	24.3848
AAEL002512-RA	1.55052	8.17363	4.86207
AAEL002514-RB	1.255	4.35958	2.80729
AAEL002518-RB	0	0	0
AAEL002518-RC	0	0	0
AAEL002518-RD	0.0328532	0.0225771	0.0277152
AAEL002518-RE	0	0	0
AAEL002518-RF	0	0.0203298	0.0101649
AAEL002520-RA	0.248658	0.404191	0.326425
AAEL002520-RB	0	0	0
AAEL002523-RA	27.6081	52.6116	40.1099
AAEL002524-RA	0.585386	1.22931	0.907348
AAEL002525-RA	3.32478	4.36042	3.8426
AAEL002526-RA	107.153	127.363	117.258
AAEL002527-RA	96.2346	154.25	125.242
AAEL002527-RB	8.09927	11.4495	9.77439
AAEL002529-RA	3.28218	16.3385	9.81034
AAEL002531-RA	2.37792	2.72984	2.55388
AAEL002534-RA	3684.04	3090.38	3387.21
AAEL002537-RB	0	0.306393	0.153197
AAEL002538-RA	0.225703	0.406196	0.315949
AAEL002539-RA	44.2257	48.3798	46.3028
AAEL002539-RB	6.79321	7.33949	7.06635
AAEL002541-RB	0	0.270227	0.135113
AAEL002542-RA	107.833	97.1516	102.492
AAEL002543-RB	0	0	0
AAEL002543-RC	0	0	0
AAEL002543-RD	2.29092	6.34984	4.32038
AAEL002543-RE	0	0	0
AAEL002544-RA	6.39622	7.6062	7.00121
AAEL002544-RB	1.05063	6.49136	3.771
AAEL002546-RA	0.293755	1.95717	1.12546
AAEL002547-RA	0	0.16177	0.080885
AAEL002548-RB	5.01864	10.4646	7.74162
AAEL002549-RA	0.0163297	0.319135	0.167732
AAEL002550-RE	0	0.37419	0.187095
AAEL002550-RF	0	1.13997	0.569985
AAEL002550-RG	4.02162	11.106	7.56381
AAEL002551-RB	28.3402	54.4806	41.4104
AAEL002554-RC	0	0	0
AAEL002554-RD	3.35207	16.4969	9.92449
AAEL002554-RE	0	9.35562	4.67781
AAEL002554-RF	0	0	0
AAEL002555-RB	0	0.000547553	0.000273776
AAEL002555-RC	0	0.349271	0.174635
AAEL002555-RD	0	0	0
AAEL002555-RE	0.492146	0.646577	0.569361
AAEL002555-RF	1.18467	0.899993	1.04233
AAEL002556-RB	0.996047	1.83161	1.41383
AAEL002557-RB	2.7e-10	12.8603	6.43015
AAEL002557-RC	0	0.18748	0.09374
AAEL002557-RD	0.000104659	0	5.23295e-05
AAEL002557-RE	0.506871	0.817604	0.662238
AAEL002557-RF	0	0.00987566	0.00493783
AAEL002557-RG	0	0	0
AAEL002559-RB	0.0401097	0.875198	0.457654
AAEL002560-RA	41.3668	41.241	41.3039
AAEL002560-RB	0	0	0
AAEL002560-RC	0.504093	0.107198	0.305646
AAEL002562-RA	12.7052	6.28909	9.49714
AAEL002562-RB	5.3672	9.01926	7.19323
AAEL002563-RA	3.23204	5.87923	4.55563
AAEL002564-RA	0	0	0
AAEL002565-RA	0	0	0
AAEL002565-RB	0.312247	0.0171781	0.164713
AAEL002565-RC	0	0	0
AAEL002565-RD	0	0	0
AAEL002565-RE	0	0	0
AAEL002565-RF	0	0	0
AAEL002565-RG	0.470891	0.399993	0.435442
AAEL002565-RH	3.87631	5.70734	4.79183
AAEL002566-RA	0.028213	0.201248	0.11473
AAEL002567-RA	0	0.0123304	0.0061652
AAEL002567-RB	0	0	0
AAEL002567-RC	0.108368	0.054722	0.081545
AAEL002567-RD	0	0	0
AAEL002567-RE	0	0	0
AAEL002569-RB	0.38705	8.10887	4.24796
AAEL002569-RC	0	1.03575	0.517875
AAEL002569-RD	0	9.64e-11	4.82e-11
AAEL002571-RB	0.151149	0.0623628	0.106756
AAEL002571-RC	0	0.0334364	0.0167182
AAEL002571-RD	0	0	0
AAEL002571-RE	0	0	0
AAEL002571-RF	0	0	0
AAEL002571-RG	0	0	0
AAEL002571-RH	0	0	0
AAEL002571-RI	0	0	0
AAEL002571-RJ	0	0	0
AAEL002572-RA	107.711	159.455	133.583
AAEL002574-RA	0	0	0
AAEL002575-RB	0	0	0
AAEL002575-RC	0	0	0
AAEL002733-RB	25.206	35.2337	30.2199
AAEL002733-RC	0	0.257654	0.128827
AAEL002733-RD	3.24017	1.23871	2.23944
AAEL002733-RE	27.2267	20.4744	23.8505
AAEL002740-RB	0.00776464	1.61e-08	0.00388233
AAEL002740-RC	0.000477747	2.56971	1.28509
AAEL002741-RB	0.12931	0.0772982	0.103304
AAEL002742-RB	0.016623	0.206632	0.111628
AAEL002745-RB	0	0	0
AAEL002754-RB	0	0.0161897	0.00809485
AAEL002764-RC	72.1013	66.0462	69.0737
AAEL002764-RD	7.75726	4.24228	5.99977
AAEL002764-RE	43.5483	45.5149	44.5316
AAEL002766-RA	5.52366	6.80909	6.16638
AAEL002769-RB	0.0750779	0.0365908	0.0558344
AAEL002769-RC	0	3.97353	1.98676
AAEL002769-RD	0	1.52048	0.76024
AAEL002769-RE	0	0.807175	0.403587
AAEL002773-RA	0	0.0235537	0.0117769
AAEL002775-RA	1.81325	1.19437	1.50381
AAEL002775-RB	0.538876	0.590575	0.564725
AAEL002783-RA	26.7241	24.3706	25.5474
AAEL002784-RA	18.9936	19.4773	19.2355
AAEL002785-RA	0.437131	2.91935	1.67824
AAEL002786-RA	0	0	0
AAEL002786-RB	0	0.00527725	0.00263862
AAEL002786-RC	0	7.91e-07	3.955e-07
AAEL002790-RA	1.75739	2.30501	2.0312
AAEL002791-RA	12.7289	13.1689	12.9489
AAEL002792-RA	0	0	0
AAEL002796-RA	2.03597	5.42929	3.73263
AAEL002796-RB	1.98978	0	0.99489
AAEL002800-RA	0.0575141	0.760017	0.408766
AAEL002801-RA	2.03066	4.95909	3.49487
AAEL002803-RB	0	0	0
AAEL002803-RC	0	0	0
AAEL002804-RA	39.0731	39.5072	39.2901
AAEL002805-RA	5.78093	10.5327	8.15681
AAEL002808-RA	16.699	18.7637	17.7313
AAEL002809-RB	4.1869	5.55143	4.86916
AAEL002809-RC	0	0.591034	0.295517
AAEL002810-RA	0.112738	3.424	1.76837
AAEL002811-RA	298.155	284.675	291.415
AAEL002812-RA	15.624	20.9653	18.2947
AAEL002813-RA	300.606	384.34	342.473
AAEL002814-RA	1.20565	1.48577	1.34571
AAEL002816-RA	3.45432	4.05497	3.75465
AAEL002817-RB	2.70357	2.36354	2.53355
AAEL002856-RA	8.04228	12.9445	10.4934
AAEL002859-RB	31.4148	36.9912	34.203
AAEL002860-RA	24.3541	35.7221	30.0381
AAEL002861-RA	18.6006	44.2141	31.4074
AAEL002863-RA	3.21854	5.45184	4.33519
AAEL002864-RA	3.02673	5.82342	4.42507
AAEL002866-RA	38.3242	48.6054	43.4648
AAEL002867-RA	58.3183	46.2777	52.298
AAEL002869-RA	2.5528	3.47548	3.01414
AAEL002870-RC	38.1314	45.6649	41.8982
AAEL002874-RB	5.62891	9.51041	7.56966
AAEL002874-RC	0	0.150005	0.0750025
AAEL002876-RB	0	0	0
AAEL002876-RC	0	0	0
AAEL002876-RD	0	0	0
AAEL002876-RE	0	0	0
AAEL002876-RF	0	0	0
AAEL002876-RG	0	0	0
AAEL002876-RH	0	0.0531737	0.0265868
AAEL002876-RI	0	0	0
AAEL002876-RJ	0	0	0
AAEL002876-RK	0	0	0
AAEL002876-RL	0	0	0
AAEL002876-RM	0	0	0
AAEL002876-RN	7.8e-08	1.29e-06	6.84e-07
AAEL002876-RO	0.00382632	0.115556	0.0596912
AAEL002876-RP	0	0	0
AAEL002877-RA	0	0.159866	0.079933
AAEL002877-RB	0	0	0
AAEL002877-RC	0	0	0
AAEL002878-RA	0	0	0
AAEL002879-RAA	0.0111924	0.000655559	0.00592398
AAEL002879-RAB	0.00832525	0.00167508	0.00500016
AAEL002879-RAC	0	0	0
AAEL002879-RAD	0	0	0
AAEL002879-RB	6.7195	6.14171	6.4306
AAEL002879-RC	0.00064998	1.72e-05	0.00033359
AAEL002879-RD	0.997596	2.97102	1.98431
AAEL002879-RE	3.24727	1.92713	2.5872
AAEL002879-RF	0.00379787	0.00021542	0.00200665
AAEL002879-RG	1.75e-06	1.66e-08	8.833e-07
AAEL002879-RH	6.98819	10.7657	8.87695
AAEL002879-RI	3.08e-05	2.27e-07	1.55135e-05
AAEL002879-RJ	0.540125	0.350796	0.44546
AAEL002879-RK	0	0	0
AAEL002879-RL	0	0	0
AAEL002879-RM	0	0	0
AAEL002879-RN	2.38163	4.97961	3.68062
AAEL002879-RO	0	0	0
AAEL002879-RP	0.00333265	0.000595521	0.00196409
AAEL002879-RQ	0	0	0
AAEL002879-RR	0	0	0
AAEL002879-RS	0	0	0
AAEL002879-RT	0.0366974	0.211527	0.124112
AAEL002879-RU	0	0.000115214	5.7607e-05
AAEL002879-RV	3.73757	2.62509	3.18133
AAEL002879-RW	0	0	0
AAEL002879-RX	0.464184	0.179976	0.32208
AAEL002879-RY	0.00474672	0.000267058	0.00250689
AAEL002879-RZ	0.466507	0.526826	0.496667
AAEL002880-RA	0	0.212314	0.106157
AAEL002881-RA	542.194	545.993	544.093
AAEL002882-RA	0	0	0
AAEL002886-RA	11.1897	10.1329	10.6613
AAEL002886-RB	96.0445	105.074	100.559
AAEL002886-RC	1.87574	1.794	1.83487
AAEL002886-RD	48.3926	20.0958	34.2442
AAEL002887-RA	26.7676	24.2738	25.5207
AAEL002887-RB	0	0.312689	0.156344
AAEL002887-RC	0.000573292	0.51161	0.256092
AAEL002887-RD	0	0	0
AAEL002887-RE	1.43449	0	0.717245
AAEL002887-RF	0	0	0
AAEL002887-RG	0	0.108664	0.054332
AAEL002887-RH	2.02046	2.91337	2.46692
AAEL002887-RI	0.444239	0.119049	0.281644
AAEL002888-RA	0.195101	1.55521	0.875155
AAEL002888-RB	5.75327	10.1279	7.94059
AAEL002890-RA	2.9938	10.4747	6.73425
AAEL002890-RB	4.88003	4.54061	4.71032
AAEL002890-RC	0	0.290427	0.145213
AAEL002890-RD	0	0	0
AAEL002891-RB	1.30309	4.9308	3.11694
AAEL002892-RA	1.13368	2.30431	1.719
AAEL002892-RB	0	2.36e-08	1.18e-08
AAEL002892-RC	0	0	0
AAEL002892-RD	0	0.321318	0.160659
AAEL002892-RE	1.48397	0	0.741985
AAEL002892-RF	0	2.93976	1.46988
AAEL002893-RA	0	0.566661	0.28333
AAEL002895-RA	2.13284	4.24629	3.18956
AAEL002896-RB	0.00433708	0.00201776	0.00317742
AAEL002896-RC	0.00018636	7.27e-05	0.00012953
AAEL002896-RD	0.00112446	0.000485006	0.000804733
AAEL002896-RE	0.0263	0.0135364	0.0199182
AAEL002898-RA	1.63456	39.5609	20.5977
AAEL002900-RA	50.462	48.8261	49.6441
AAEL002903-RA	2.45952	9.86791	6.16371
AAEL002903-RB	0.000157219	0.467855	0.234006
AAEL002903-RC	0.243965	0.459785	0.351875
AAEL002904-RA	0	0.0147595	0.00737975
AAEL002905-RA	1.2755	7.01548	4.14549
AAEL002906-RA	12.6446	15.7028	14.1737
AAEL002910-RB	3.28704	6.04819	4.66761
AAEL002912-RA	13.4864	16.3741	14.9302
AAEL002913-RB	33.7974	28.086	30.9417
AAEL002916-RA	0	0	0
AAEL002917-RA	0.549704	0.911488	0.730596
AAEL002918-RB	0.281917	1.86082	1.07137
AAEL002921-RB	0	5.74814	2.87407
AAEL002922-RA	1.30188	1.12554	1.21371
AAEL002924-RC	8.81752	9.54669	9.1821
AAEL002924-RD	0	2.45129	1.22565
AAEL002924-RE	0	5.44254	2.72127
AAEL002924-RF	5.46233	0.830959	3.14664
AAEL002925-RA	0.810775	1.37172	1.09125
AAEL002925-RB	0.640231	1.32081	0.980521
AAEL002925-RC	0	1.40989	0.704945
AAEL002929-RA	0	0.014253	0.0071265
AAEL002930-RB	0.578744	1.08434	0.831542
AAEL002932-RB	0	0.0130525	0.00652625
AAEL002933-RA	30.0733	41.1786	35.626
AAEL002934-RB	5.26202	8.41359	6.8378
AAEL002935-RC	0.960328	1.87921	1.41977
AAEL002935-RD	0	0	0
AAEL002935-RE	0	0.0677176	0.0338588
AAEL002935-RF	1.55613	1.94297	1.74955
AAEL002938-RA	15.9623	18.6177	17.29
AAEL002938-RB	0	0.60357	0.301785
AAEL002940-RA	0	0.013757	0.0068785
AAEL002943-RB	0.173982	0.293673	0.233828
AAEL002944-RA	2.94197	4.91632	3.92915
AAEL002948-RA	9.33985	12.6025	10.9712
AAEL002949-RA	0	0.618161	0.30908
AAEL002950-RB	3.72638	6.33814	5.03226
AAEL002950-RC	34.5039	22.1006	28.3023
AAEL002951-RA	0.095386	0.231038	0.163212
AAEL002955-RA	0	0	0
AAEL002955-RB	0.017524	0.0314793	0.0245016
AAEL002959-RA	0	0.2066	0.1033
AAEL002960-RA	0	0	0
AAEL002961-RA	0	0	0
AAEL002962-RA	0	0.026045	0.0130225
AAEL002964-RA	0	1.7499	0.87495
AAEL002965-RA	0	0	0
AAEL002967-RA	0.672909	2.04182	1.35736
AAEL002969-RA	0.11836	0.331071	0.224716
AAEL002972-RA	0	0.170606	0.085303
AAEL002978-RA	20.0442	40.6733	30.3588
AAEL002978-RB	0.000224313	7.04e-08	0.000112192
AAEL002978-RC	2.0161	26.2665	14.1413
AAEL002978-RD	14.8899	13.836	14.363
AAEL002979-RA	1.19676	3.69472	2.44574
AAEL002989-RA	4.16551	3.11694	3.64123
AAEL002993-RA	28.4931	34.1722	31.3326
AAEL002996-RA	3.14622	4.07829	3.61226
AAEL002999-RA	1.20728	1.0663	1.13679
AAEL002999-RB	2.15922	1.69027	1.92474
AAEL002999-RC	1.69024	2.45	2.07012
AAEL003000-RA	0	0	0
AAEL003002-RB	0	0.135082	0.067541
AAEL003004-RB	6.50006	17.0909	11.7955
AAEL003008-RB	4.26409	13.4876	8.87584
AAEL003012-RA	0	0	0
AAEL003016-RA	0	0	0
AAEL003016-RB	0	0	0
AAEL003016-RC	0	0.59572	0.29786
AAEL003018-RA	0	0.20783	0.103915
AAEL003018-RB	0.16586	0.14676	0.15631
AAEL003018-RC	0	0.176135	0.0880675
AAEL003019-RB	0	3.20246	1.60123
AAEL003019-RC	7.80528	6.65159	7.22843
AAEL003020-RA	0	0	0
AAEL003022-RA	3.18903	6.20572	4.69738
AAEL003022-RB	1.46277	2.18838	1.82557
AAEL003026-RA	0	0.458544	0.229272
AAEL003026-RB	2.61e-09	0.197104	0.098552
AAEL003026-RC	9.45e-08	5.37e-07	3.1575e-07
AAEL003026-RD	1.22e-09	5.49e-09	3.355e-09
AAEL003026-RE	3.56e-07	2.17e-06	1.263e-06
AAEL003026-RF	0.00153735	0.245344	0.123441
AAEL003026-RG	0.125246	0.103773	0.11451
AAEL003032-RB	3.18613	10.8873	7.03672
AAEL003034-RA	2.36827	5.5294	3.94883
AAEL003035-RA	0.298092	0.561586	0.429839
AAEL003036-RA	0.747781	2.36629	1.55704
AAEL003039-RA	143.03	195.175	169.103
AAEL003041-RA	0	0.127219	0.0636095
AAEL003043-RB	0.0211341	0.101708	0.0614211
AAEL003043-RC	0	0	0
AAEL003045-RA	0	0	0
AAEL003045-RB	0	0	0
AAEL003046-RB	120.561	136.878	128.719
AAEL003047-RB	1.36164	2.05158	1.70661
AAEL003047-RC	9.92e-09	1.85e-10	5.0525e-09
AAEL003049-RA	0	0	0
AAEL003100-RA	0	0.0554499	0.027725
AAEL003100-RB	0	0	0
AAEL003100-RC	0	0.0854419	0.042721
AAEL003103-RA	35.3715	42.8824	39.1269
AAEL003103-RB	28.0492	52.8548	40.452
AAEL003103-RC	8.88749	18.1544	13.5209
AAEL003107-RA	0.156267	0.159362	0.157814
AAEL003109-RA	8.71986	16.2011	12.4605
AAEL003109-RB	2.52339	3.44205	2.98272
AAEL003109-RC	0	0.891825	0.445912
AAEL003154-RA	1.25966	1.1484	1.20403
AAEL003156-RA	0	0	0
AAEL003156-RB	0	0	0
AAEL003160-RA	507.785	1446.53	977.158
AAEL003161-RA	74.5697	72.2755	73.4226
AAEL003163-RB	0.0263647	0.0389591	0.0326619
AAEL003165-RA	2.63831	5.06374	3.85102
AAEL003170-RB	5.61841	7.83915	6.72878
AAEL003173-RA	0.510881	0.381717	0.446299
AAEL003173-RB	0	0.0560844	0.0280422
AAEL003176-RA	1.39205	1.37699	1.38452
AAEL003177-RA	0.382739	0.027614	0.205176
AAEL003179-RB	32.2225	73.1363	52.6794
AAEL003180-RA	21.5462	30.3021	25.9241
AAEL003181-RA	0	0	0
AAEL003182-RA	0	0.0665752	0.0332876
AAEL003183-RA	0.556406	0.125033	0.340719
AAEL003184-RC	0.718307	0.0321277	0.375217
AAEL003184-RD	0.775045	1.33844	1.05674
AAEL003184-RE	0.044802	0.316342	0.180572
AAEL003187-RA	0	0	0
AAEL003190-RA	10.262	2.39111	6.32655
AAEL003193-RA	9.6346	24.9874	17.311
AAEL003193-RB	30.3396	32.9743	31.657
AAEL003194-RA	2.49937	3.87179	3.18558
AAEL003196-RA	0	0	0
AAEL003198-RA	0	4.16e-07	2.08e-07
AAEL003201-RA	0	0.00709763	0.00354881
AAEL003203-RC	17.8769	24.4488	21.1628
AAEL003203-RD	39.6285	31.7934	35.7109
AAEL003203-RE	0.480193	1.33451	0.907352
AAEL003203-RF	0.000461834	0.446345	0.223403
AAEL003206-RA	19.5689	42.3454	30.9571
AAEL003211-RA	0	0	0
AAEL003211-RB	0	0.0941001	0.0470501
AAEL003213-RB	3.04285	3.36128	3.20207
AAEL003214-RA	0	0	0
AAEL003228-RA	2.26146	7.0338	4.64763
AAEL003228-RB	5.34239	1.17505	3.25872
AAEL003228-RC	0	0.263329	0.131664
AAEL003229-RA	7.68e-05	3.67e-07	3.85835e-05
AAEL003229-RB	3.06173	4.54607	3.8039
AAEL003230-RA	10.2601	13.6733	11.9667
AAEL003233-RA	0	0.0841588	0.0420794
AAEL003237-RA	6.32634	4.03596	5.18115
AAEL003238-RA	0.978841	3.2983	2.13857
AAEL003239-RA	0	0	0
AAEL003243-RA	0.145128	12.999	6.57206
AAEL003253-RA	0	0.105048	0.052524
AAEL003253-RB	0	0	0
AAEL003257-RB	0	0.51281	0.256405
AAEL003260-RA	1.80633	1.72604	1.76619
AAEL003262-RA	0	0.041828	0.020914
AAEL003267-RB	1.58485	0.988532	1.28669
AAEL003267-RC	9.36821	11.0921	10.2302
AAEL003271-RB	0.139603	2.16576	1.15268
AAEL003275-RA	8.10062	20.0371	14.0689
AAEL003277-RA	0.558433	1.86293	1.21068
AAEL003277-RB	0.487295	1.00092	0.744108
AAEL003277-RC	0	0	0
AAEL003277-RD	0	0.220742	0.110371
AAEL003277-RE	0	0.184902	0.092451
AAEL003277-RF	0	0	0
AAEL003277-RG	0	0	0
AAEL003277-RH	0	0.254964	0.127482
AAEL003279-RA	0.343542	0.57313	0.458336
AAEL003281-RB	5.09729	9.01758	7.05743
AAEL003283-RB	0	0	0
AAEL003283-RC	0	0.082308	0.041154
AAEL003283-RD	0.0385138	0	0.0192569
AAEL003283-RE	0.0101937	1.73427	0.872232
AAEL003283-RF	1.51157	2.5554	2.03349
AAEL003283-RG	0	0	0
AAEL003283-RH	0	0	0
AAEL003329-RA	0	0	0
AAEL003340-RA	0	0	0
AAEL003341-RB	0	0	0
AAEL003353-RA	0	0	0
AAEL003490-RA	1.40207	3.08373	2.2429
AAEL003491-RC	0	0	0
AAEL003491-RD	21.3013	9.39748	15.3494
AAEL003491-RE	3.34423	20.8175	12.0809
AAEL003491-RF	0	2.42471	1.21236
AAEL003495-RB	2.01559	3.26864	2.64211
AAEL003495-RC	0	0.226263	0.113131
AAEL003495-RD	0	3.21133	1.60566
AAEL003501-RA	0	0	0
AAEL003503-RA	23.4269	39.1941	31.3105
AAEL003504-RB	0.296544	0.0196894	0.158117
AAEL003506-RA	0.122978	0.120213	0.121595
AAEL003581-RC	0	2.52168	1.26084
AAEL003581-RD	11.5989	16.2574	13.9282
AAEL003582-RA	3739.32	3043.17	3391.24
AAEL003597-RA	21.5468	16.0673	18.8071
AAEL003597-RB	0	0.458095	0.229047
AAEL003599-RA	2.96827	7.88897	5.42862
AAEL003599-RB	4.03324	2.93916	3.4862
AAEL003599-RC	0	2.26455	1.13227
AAEL003600-RA	0	0.92125	0.460625
AAEL003601-RA	0.832667	2.11463	1.47365
AAEL003605-RA	4.95244	3.13375	4.0431
AAEL003605-RB	8.72068	16.8546	12.7876
AAEL003606-RA	38.9798	37.2758	38.1278
AAEL003611-RA	0.725298	1.21416	0.969729
AAEL003611-RB	0.403656	0.0352696	0.219463
AAEL003613-RA	0	0	0
AAEL003613-RB	0	0.18918	0.09459
AAEL003622-RA	0	0.0268884	0.0134442
AAEL003622-RB	0	0	0
AAEL003622-RC	1.63e-08	0	8.15e-09
AAEL003622-RD	0.826351	0.0960185	0.461185
AAEL003628-RA	0	0.339799	0.1699
AAEL003629-RA	0	0	0
AAEL003631-RA	0	0.0153319	0.00766595
AAEL003632-RA	0.239538	0.0705011	0.15502
AAEL003634-RA	32.7342	41.2045	36.9694
AAEL003645-RA	282.455	191.097	236.776
AAEL003742-RA	0.379743	3.68241	2.03108
AAEL003743-RA	4.53438	3.45646	3.99542
AAEL003743-RB	4.68068	6.39063	5.53566
AAEL003743-RC	0	1.30269	0.651345
AAEL003743-RD	10.3031	13.4996	11.9014
AAEL003743-RE	5.34e-07	6.13891	3.06946
AAEL003746-RA	25.7892	32.2847	29.037
AAEL003748-RA	68.3466	64.448	66.3973
AAEL003749-RA	5.60766	10.5284	8.06803
AAEL003749-RB	7.2011	5.9598	6.58045
AAEL003750-RA	323.372	414.299	368.836
AAEL003752-RA	23.2774	32.0655	27.6715
AAEL003754-RA	1.5426	1.22558	1.38409
AAEL003754-RB	0	0	0
AAEL003754-RC	0	0	0
AAEL003754-RD	3.19409	1.66126	2.42767
AAEL003754-RE	1.27473	1.79801	1.53637
AAEL003754-RF	2.54e-10	1.13229	0.566145
AAEL003755-RA	4.52059	4.44578	4.48319
AAEL003756-RA	1.2284	7.06255	4.14548
AAEL003757-RA	0	0	0
AAEL003758-RA	16.4252	18.6889	17.5571
AAEL003758-RB	1.02464	0.273828	0.649234
AAEL003762-RA	0	0.56376	0.28188
AAEL003762-RB	1.47185	0.799654	1.13575
AAEL003762-RC	0.0429533	0.0274612	0.0352073
AAEL003762-RD	1.63828	1.17666	1.40747
AAEL003763-RA	7.55089	4.9259	6.2384
AAEL003764-RA	226.453	186.487	206.47
AAEL003766-RA	0.239431	0.416343	0.327887
AAEL003768-RB	0	0	0
AAEL003768-RC	0	0.299824	0.149912
AAEL003768-RD	2.23e-10	0.825797	0.412899
AAEL003768-RE	2.80411	8.42952	5.61681
AAEL003769-RB	36.9744	37.1171	37.0457
AAEL003770-RA	8.36944	10.3783	9.37387
AAEL003771-RA	0	3.23261	1.61631
AAEL003771-RB	7.55421	6.87151	7.21286
AAEL003772-RB	0.0763909	0.0600591	0.068225
AAEL003773-RA	0	0.546759	0.273379
AAEL003774-RA	41.3954	32.5999	36.9977
AAEL003776-RA	6.88055	8.79057	7.83556
AAEL003777-RB	1.17131	0.963011	1.06716
AAEL003777-RC	9.19e-05	4.41e-05	6.8e-05
AAEL003777-RD	6.60587	5.778	6.19193
AAEL003777-RE	2.34e-09	0.128334	0.064167
AAEL003777-RF	4.04e-09	0	2.02e-09
AAEL003777-RG	5.74e-07	3.26e-06	1.917e-06
AAEL003779-RB	3.06341	6.70575	4.88458
AAEL003781-RA	0	0.543368	0.271684
AAEL003781-RB	3.4173	4.5975	4.0074
AAEL003782-RA	0	0.610851	0.305426
AAEL003785-RA	22.2375	19.054	20.6457
AAEL003785-RB	0	2.2926	1.1463
AAEL003789-RB	6.24242	11.7345	8.98846
AAEL003789-RC	14.9941	12.8516	13.9229
AAEL003791-RA	6.30681	11.5231	8.91495
AAEL003794-RB	0	0.204558	0.102279
AAEL003797-RA	0	0.386762	0.193381
AAEL003801-RA	22.8365	26.8927	24.8646
AAEL003803-RA	0.130686	0.282506	0.206596
AAEL003806-RB	0	0.319121	0.15956
AAEL003809-RA	0.0445685	0.132336	0.0884523
AAEL003810-RA	0	0	0
AAEL003812-RB	0.68943	1.37932	1.03438
AAEL003812-RC	2.58e-10	0	1.29e-10
AAEL003812-RD	1.37597	1.37082	1.37339
AAEL003812-RE	7.52e-11	0	3.76e-11
AAEL003812-RF	1.96997	6.97858	4.47428
AAEL003812-RG	0	0.520584	0.260292
AAEL003813-RB	0.443317	2.05597	1.24964
AAEL003813-RC	0.564969	0.912429	0.738699
AAEL003813-RD	0	0	0
AAEL003883-RB	6.70736	13.4569	10.0821
AAEL003903-RA	7.61871	7.27619	7.44745
AAEL003903-RB	0	0.652989	0.326495
AAEL003903-RC	13.6741	24.0491	18.8616
AAEL003905-RA	0	0.000812702	0.000406351
AAEL003905-RB	0	7.15e-07	3.575e-07
AAEL003905-RC	0	0	0
AAEL003905-RD	0	0	0
AAEL003905-RE	0	0.0383866	0.0191933
AAEL003906-RA	0.812379	4.81234	2.81236
AAEL003907-RB	6.33707	8.04417	7.19062
AAEL003908-RA	3.61665	5.76618	4.69142
AAEL003909-RA	10.1229	8.29744	9.21017
AAEL003910-RB	1.22639	0.646712	0.936551
AAEL003911-RB	4.90623	8.65732	6.78177
AAEL003912-RA	11.3958	21.7077	16.5517
AAEL003913-RA	2.76187	2.7443	2.75309
AAEL003914-RB	0.623251	1.14191	0.88258
AAEL003914-RC	0	0.724815	0.362407
AAEL003914-RD	0	0	0
AAEL003914-RE	0	0	0
AAEL003914-RF	0	0.533994	0.266997
AAEL003914-RG	7.81e-07	0	3.905e-07
AAEL003914-RH	0	0.439992	0.219996
AAEL003915-RA	0	0	0
AAEL003916-RA	9.96666	18.0634	14.015
AAEL003917-RA	2.95355	7.4795	5.21652
AAEL003917-RB	0	0	0
AAEL003917-RC	5.81137	0	2.90569
AAEL003918-RB	0.311774	0	0.155887
AAEL003918-RC	0	0.36454	0.18227
AAEL003918-RD	0	0.734343	0.367171
AAEL003919-RA	0.659717	1.45929	1.0595
AAEL003919-RB	0.251546	0.309078	0.280312
AAEL003919-RC	0	0.706975	0.353488
AAEL003921-RA	11.9123	28.3518	20.132
AAEL003922-RA	3.06668	6.8281	4.94739
AAEL004042-RE	53.411	57.6461	55.5285
AAEL004042-RF	8.67756	22.9514	15.8145
AAEL004043-RA	9.43204	10.6266	10.0293
AAEL004046-RB	0.75648	0.497255	0.626868
AAEL004048-RA	0.520663	1.29509	0.907876
AAEL004050-RA	2.5097	3.38693	2.94832
AAEL004052-RA	9.16835	13.5962	11.3823
AAEL004053-RA	6.63711	21.4337	14.0354
AAEL004054-RA	0.14209	28.6257	14.3839
AAEL004055-RA	2.44724	8.26835	5.35779
AAEL004056-RB	7.04408	12.6612	9.85264
AAEL004057-RB	0.0816023	7.05e-05	0.0408364
AAEL004057-RC	3.99422	5.51143	4.75282
AAEL004059-RB	68.9704	80.045	74.5077
AAEL004060-RB	161.769	237.047	199.408
AAEL004060-RC	6.70053	11.0539	8.87721
AAEL004063-RB	18.5101	17.4454	17.9778
AAEL004064-RB	0.464818	2.04154	1.25318
AAEL004065-RA	60.1297	63.9755	62.0526
AAEL004067-RA	172.212	141.653	156.933
AAEL004068-RA	4.75196	13.6126	9.18228
AAEL004069-RA	49.0986	50.3457	49.7221
AAEL004070-RA	3.2929	4.22415	3.75852
AAEL004071-RA	132.123	158.849	145.486
AAEL004074-RA	9.03499	9.02626	9.03063
AAEL004074-RB	3.23652	1.27902	2.25777
AAEL004075-RA	7.07037	10.825	8.94768
AAEL004076-RC	0.79036	4.82999	2.81017
AAEL004076-RD	16.9179	13.9347	15.4263
AAEL004081-RA	24.7662	29.9833	27.3747
AAEL004155-RA	0	0.272444	0.136222
AAEL004163-RA	1.2087	1.24899	1.22885
AAEL004167-RA	23.035	24.8368	23.9359
AAEL004169-RA	15.6292	12.0866	13.8579
AAEL004179-RA	1.58138	1.05142	1.3164
AAEL004179-RB	0	0.496227	0.248113
AAEL004180-RB	6.54789	8.20148	7.37468
AAEL004193-RB	0.0319712	2.84467	1.43832
AAEL004193-RC	1.12821	1.70101	1.41461
AAEL004193-RD	4.00794	1.96556	2.98675
AAEL004193-RE	0.459375	3.76972	2.11455
AAEL004193-RF	2.06947	0.168042	1.11876
AAEL004193-RG	0	0	0
AAEL004193-RH	8.46583	3.65301	6.05942
AAEL004195-RA	55.2242	60.0369	57.6305
AAEL004217-RB	0	0	0
AAEL004217-RC	0	0	0
AAEL004217-RD	0	0	0
AAEL004217-RE	0	0	0
AAEL004217-RF	0	0	0
AAEL004217-RG	0	0	0
AAEL004217-RH	0	0	0
AAEL004217-RI	0	0	0
AAEL004217-RJ	0.135433	0.160012	0.147722
AAEL004227-RD	21.307	22.6933	22.0001
AAEL004227-RE	63.2906	75.5827	69.4367
AAEL004227-RF	1.33917	0.179258	0.759214
AAEL004228-RA	14.9574	19.4177	17.1876
AAEL004229-RA	0.380522	1.37719	0.878856
AAEL004231-RA	0	0.106528	0.053264
AAEL004231-RB	0	0	0
AAEL004231-RC	0	0	0
AAEL004233-RB	0	0	0
AAEL004233-RC	0	0.0130627	0.00653135
AAEL004233-RD	0	0.0401465	0.0200733
AAEL004234-RA	24.4242	43.3283	33.8762
AAEL004235-RA	2.0555	10.9606	6.50805
AAEL004235-RB	3.64279	3.99652	3.81966
AAEL004235-RC	0	0	0
AAEL004235-RD	0	0.616777	0.308389
AAEL004235-RE	0	1.22693	0.613465
AAEL004235-RF	0.309403	0.774218	0.54181
AAEL004235-RG	0.174767	0.578146	0.376457
AAEL004235-RH	0	0.194312	0.097156
AAEL004235-RI	0	0.373647	0.186824
AAEL004235-RJ	0	0	0
AAEL004235-RK	0	0	0
AAEL004236-RA	0.147401	0.140306	0.143853
AAEL004236-RB	3.3e-07	6.89e-11	1.65034e-07
AAEL004236-RC	1.32e-07	0.237376	0.118688
AAEL004236-RD	2.68961	4.0439	3.36675
AAEL004236-RE	0	1.46161	0.730805
AAEL004236-RF	6.21691	5.77045	5.99368
AAEL004237-RA	2.41775	3.82833	3.12304
AAEL004238-RA	0.519893	0.510322	0.515108
AAEL004239-RA	0.770529	1.00866	0.889594
AAEL004240-RA	0.266526	0.105497	0.186011
AAEL004242-RA	11.3956	10.4296	10.9126
AAEL004242-RB	0	0	0
AAEL004243-RA	1.2396	6.24004	3.73982
AAEL004244-RA	0.0325247	2.59988	1.3162
AAEL004245-RB	0	0.263912	0.131956
AAEL004275-RA	0	0	0
AAEL004280-RA	0	0.0352552	0.0176276
AAEL004298-RA	0	0	0
AAEL004303-RB	0	0.0112811	0.00564055
AAEL004386-RA	0	107.59	53.795
AAEL004388-RA	0	21.6417	10.8209
AAEL004389-RB	0.541142	1.73756	1.13935
AAEL004390-RA	0	81.3738	40.6869
AAEL004392-RB	0.336844	0.948024	0.642434
AAEL004396-RB	0	5.55273	2.77637
AAEL004397-RA	9.7509	15.0724	12.4116
AAEL004398-RB	0	0.0130745	0.00653725
AAEL004399-RB	0	0.139962	0.069981
AAEL004404-RA	67.376	72.0558	69.7159
AAEL004410-RB	0	2.15423	1.07712
AAEL004410-RC	0.228103	1.31198	0.770041
AAEL004410-RD	0.0946611	0	0.0473305
AAEL004524-RA	0.0127839	0.752982	0.382883
AAEL004524-RB	0.1015	0	0.05075
AAEL004528-RA	3.51709	7.53944	5.52827
AAEL004543-RB	0	0.580234	0.290117
AAEL004544-RB	0	0.137907	0.0689535
AAEL004546-RA	41.0398	41.6805	41.3602
AAEL004547-RA	0	0	0
AAEL004547-RB	0.307263	1.54588	0.926571
AAEL004551-RA	5.2909	14.9097	10.1003
AAEL004552-RA	3.92286	8.10056	6.01171
AAEL004553-RA	19.8029	21.1868	20.4948
AAEL004554-RA	0.200503	2.62265	1.41158
AAEL004554-RC	5.84471	10.6105	8.22761
AAEL004555-RA	0.312605	0.455812	0.384209
AAEL004557-RB	0	0	0
AAEL004558-RA	3.75628	9.52159	6.63894
AAEL004559-RB	2.57862	0.143746	1.36118
AAEL004559-RC	0	4.17e-05	2.085e-05
AAEL004559-RD	2.59535	15.193	8.89418
AAEL004559-RE	0	0	0
AAEL004559-RF	0	0.184914	0.092457
AAEL004559-RG	0.206393	0	0.103196
AAEL004559-RH	0	0	0
AAEL004559-RI	1.67417	0.750337	1.21225
AAEL004559-RJ	0.397472	5.80822	3.10285
AAEL004559-RK	0	0	0
AAEL004561-RA	0.4419	0.704439	0.573169
AAEL004562-RA	0.675948	4.2937	2.48482
AAEL004563-RA	32.7069	30.0154	31.3611
AAEL004564-RA	0	0	0
AAEL004566-RA	8.91875	11.4439	10.1813
AAEL004567-RA	23.6948	30.9061	27.3004
AAEL004568-RA	0.967148	0.708503	0.837826
AAEL004569-RA	1.15783	2.14716	1.6525
AAEL004570-RA	6.07196	9.13294	7.60245
AAEL004571-RA	0.462016	4.57378	2.5179
AAEL004572-RB	0	0.0128593	0.00642965
AAEL004572-RC	0.366893	0.0817935	0.224343
AAEL004573-RB	0	0	0
AAEL004574-RA	7.17281	8.95362	8.06321
AAEL004575-RA	0.243141	0.170745	0.206943
AAEL004575-RB	9.76243	11.7964	10.7794
AAEL004576-RA	0.575884	0.815405	0.695644
AAEL004577-RA	3.09991	7.781	5.44046
AAEL004579-RA	0	0.346495	0.173247
AAEL004579-RB	2.63073	4.94412	3.78742
AAEL004580-RA	6.47916	1.70399	4.09157
AAEL004580-RB	0	0	0
AAEL004580-RC	1.95e-09	3.00318	1.50159
AAEL004581-RA	1.74288	1.35393	1.54841
AAEL004581-RB	0	0	0
AAEL004581-RC	0	0	0
AAEL004582-RB	0.612757	0.768612	0.690684
AAEL004602-RA	0	0	0
AAEL004603-RA	77.8618	54.4228	66.1423
AAEL004605-RA	0	0.0958215	0.0479108
AAEL004607-RA	33.1071	36.9961	35.0516
AAEL004608-RA	2.23633	1.83996	2.03815
AAEL004608-RB	2.09126	4.64065	3.36596
AAEL004613-RA	52.3975	68.1848	60.2912
AAEL004616-RA	158.079	160.207	159.143
AAEL004620-RB	13.0382	19.2798	16.159
AAEL004620-RC	0	2.03539	1.0177
AAEL004623-RB	2.11313	8.65679	5.38496
AAEL004624-RB	0	11.367	5.6835
AAEL004625-RA	6.55922	10.225	8.39211
AAEL004630-RA	0.168888	0.618817	0.393852
AAEL004630-RB	1.49009	2.86951	2.1798
AAEL004631-RA	17.9776	24.8957	21.4367
AAEL004633-RA	4.30476	5.49753	4.90114
AAEL004633-RB	0.734079	0.810911	0.772495
AAEL004634-RA	0.588992	7.47561	4.0323
AAEL004634-RB	0	0.896618	0.448309
AAEL004643-RA	9.4511	14.9575	12.2043
AAEL004645-RB	0.0451489	2.44877	1.24696
AAEL004646-RA	14.9005	33.9406	24.4206
AAEL004648-RA	0	0.0414859	0.0207429
AAEL004685-RA	4.31731	9.61409	6.9657
AAEL004686-RA	11.0619	15.8771	13.4695
AAEL004688-RB	0	2.32e-07	1.16e-07
AAEL004688-RC	2.15561	7.06514	4.61038
AAEL004688-RD	6.15278	5.43579	5.79429
AAEL004688-RE	2.16388	0.650162	1.40702
AAEL004688-RF	0.175646	0.897787	0.536717
AAEL004688-RG	4.88e-09	2.13e-05	1.06524e-05
AAEL004689-RA	0.162471	1.37778	0.770126
AAEL004689-RB	0	0	0
AAEL004689-RC	0	0.201632	0.100816
AAEL004689-RD	0	0	0
AAEL004689-RE	0	0.697229	0.348614
AAEL004689-RF	2.01613	2.32741	2.17177
AAEL004690-RB	0	2.46762	1.23381
AAEL004690-RC	0.222746	0.628646	0.425696
AAEL004691-RA	66.2557	113.502	89.8788
AAEL004691-RB	0	0	0
AAEL004692-RB	1.79321	1.16911	1.48116
AAEL004692-RC	0	0.0944893	0.0472446
AAEL004694-RA	3.03e-07	0.0015816	0.000790951
AAEL004694-RB	0.107773	0.356631	0.232202
AAEL004694-RC	0.227508	0.123509	0.175508
AAEL004694-RD	0.00299201	5.03e-08	0.00149603
AAEL004694-RE	0.00123627	1.99e-08	0.000618145
AAEL004694-RF	0.453692	5.81458	3.13414
AAEL004694-RG	0.18673	3.86e-06	0.0933669
AAEL004694-RH	0	0.217728	0.108864
AAEL004696-RA	0	0	0
AAEL004697-RA	0.679392	4.65913	2.66926
AAEL004697-RB	12.6287	3.09912	7.86391
AAEL004697-RC	3.06873	14.2318	8.65026
AAEL004698-RA	0.300955	2.83997	1.57046
AAEL004699-RA	271.535	430.09	350.812
AAEL004700-RA	0	2.37201	1.186
AAEL004700-RB	0	1.6575	0.82875
AAEL004700-RC	0	1.10065	0.550325
AAEL004700-RD	0	0.000597226	0.000298613
AAEL004701-RA	0	0.232761	0.11638
AAEL004702-RA	4.98653	12.8993	8.94291
AAEL004702-RB	0.269285	0.232863	0.251074
AAEL004703-RA	0	0.0188885	0.00944425
AAEL004705-RA	0	0	0
AAEL004707-RA	0	0	0
AAEL004809-RA	0.986304	4.43379	2.71005
AAEL004824-RB	0.0444474	0.282763	0.163605
AAEL004863-RB	0	3.24315	1.62157
AAEL004865-RA	59.5593	91.6805	75.6199
AAEL004866-RA	10.3278	13.2558	11.7918
AAEL004867-RB	3.72503	3.55624	3.64063
AAEL004868-RA	2.21635	4.2314	3.22387
AAEL004869-RA	3.50616	13.7271	8.61663
AAEL004870-RA	0.108636	0.811239	0.459937
AAEL004872-RB	0	0.0285726	0.0142863
AAEL004872-RC	0	0	0
AAEL004873-RA	5.44791	17.0959	11.2719
AAEL004873-RB	2.27196	0	1.13598
AAEL004874-RA	4.21665	4.30754	4.2621
AAEL004874-RB	0	0.428418	0.214209
AAEL004875-RA	0.928046	5.25877	3.09341
AAEL004875-RB	0.388802	0.851144	0.619973
AAEL004875-RC	0	0.437066	0.218533
AAEL004876-RA	0	0	0
AAEL004876-RB	0	0	0
AAEL004876-RC	0	0	0
AAEL004877-RA	1.1841	3.58556	2.38483
AAEL004879-RA	13.7822	21.6816	17.7319
AAEL004881-RB	0	0.250553	0.125277
AAEL004883-RB	0	0	0
AAEL004883-RC	0	0	0
AAEL004883-RD	0	0.0730341	0.0365171
AAEL004884-RA	3.30286	8.1563	5.72958
AAEL004885-RB	0.281486	0.0311906	0.156338
AAEL004889-RA	4.43892	7.04657	5.74275
AAEL004891-RB	2.8886	6.30643	4.59751
AAEL004892-RB	4.38312	8.64543	6.51427
AAEL005047-RA	1.03862	2.10362	1.57112
AAEL005048-RC	0	0	0
AAEL005048-RD	13.8546	12.0972	12.9759
AAEL005048-RE	2.09383	3.29795	2.69589
AAEL005049-RA	0	16.4482	8.2241
AAEL005052-RA	45.2948	42.0613	43.678
AAEL005052-RB	19.1964	25.4863	22.3413
AAEL005053-RB	1.17477	2.4225	1.79863
AAEL005054-RA	45.6545	50.6689	48.1617
AAEL005058-RA	1.378	1.07614	1.22707
AAEL005060-RB	0	0.0107611	0.00538055
AAEL005061-RA	2.04902	3.50351	2.77626
AAEL005064-RA	0.149875	9.82578	4.98783
AAEL005068-RA	1.69105	5.7838	3.73742
AAEL005068-RB	0.763609	0.760523	0.762066
AAEL005069-RA	52.3086	63.5116	57.9101
AAEL005070-RA	4.99909	7.28744	6.14326
AAEL005071-RA	3.62034	1.54814	2.58424
AAEL005071-RB	1.15011	1.30233	1.22622
AAEL005071-RC	3.04625	5.92841	4.48733
AAEL005071-RD	0	0.892521	0.446261
AAEL005072-RA	0.649244	0.69683	0.673037
AAEL005073-RB	0.094235	0.14511	0.119672
AAEL005073-RC	0.094235	0.14511	0.119672
AAEL005074-RB	0.00163414	0	0.00081707
AAEL005074-RC	0.579004	0	0.289502
AAEL005074-RD	0	0	0
AAEL005074-RE	0.527896	2.17557	1.35173
AAEL005074-RF	0	0	0
AAEL005074-RG	0	0	0
AAEL005075-RA	6.76486	9.90111	8.33298
AAEL005076-RB	5.3e-08	0.0556159	0.027808
AAEL005076-RC	2.61e-06	1.4e-06	2.005e-06
AAEL005076-RD	0.072862	0.06852	0.070691
AAEL005079-RB	0.0779896	0	0.0389948
AAEL005079-RC	0	0.14475	0.072375
AAEL005080-RA	5.27064	8.04701	6.65883
AAEL005084-RA	14.4688	19.8408	17.1548
AAEL005086-RA	9.71e-05	5.89254	2.94632
AAEL005086-RB	1.00045	0.446153	0.723302
AAEL005160-RB	0	0	0
AAEL005160-RC	0.121532	2.09571	1.10862
AAEL005160-RD	0	0.169612	0.084806
AAEL005162-RA	24.2352	33.058	28.6466
AAEL005162-RB	0	0.943876	0.471938
AAEL005163-RA	22.0618	28.3258	25.1938
AAEL005165-RD	44.4923	29.1679	36.8301
AAEL005165-RE	0.150277	5.34106	2.74567
AAEL005165-RF	22.555	30.8328	26.6939
AAEL005165-RG	265.625	247.659	256.642
AAEL005169-RA	4.0439	7.62361	5.83376
AAEL005242-RA	0.702911	0.891877	0.797394
AAEL005243-RB	0	0.0589383	0.0294691
AAEL005247-RA	0	0.0348281	0.0174141
AAEL005247-RB	0	0	0
AAEL005254-RA	3.18703	6.00149	4.59426
AAEL005261-RB	11.2652	16.8874	14.0763
AAEL005266-RC	52.0704	23.4549	37.7627
AAEL005266-RD	3868.68	3022.57	3445.62
AAEL005271-RB	0.730646	1.43399	1.08232
AAEL005271-RC	5.61542	9.70003	7.65773
AAEL005278-RA	0	0.0163091	0.00815455
AAEL005278-RB	0	0	0
AAEL005279-RA	1.98335	3.18166	2.5825
AAEL005281-RA	1.95801	3.5702	2.7641
AAEL005281-RB	0.000347257	0.505371	0.252859
AAEL005400-RA	2.41056	0.000176988	1.20537
AAEL005400-RAA	0	0	0
AAEL005400-RAB	0.911584	1.51928	1.21543
AAEL005400-RAC	1.14003	2.29423	1.71713
AAEL005400-RAD	0	0	0
AAEL005400-RAE	0	0	0
AAEL005400-RB	12.039	22.4894	17.2642
AAEL005400-RC	1.36361	4.45218	2.90789
AAEL005400-RD	0.0360617	4.7562	2.39613
AAEL005400-RE	0	0	0
AAEL005400-RF	0	0	0
AAEL005400-RG	1.3945	0.345293	0.869897
AAEL005400-RH	0.317045	0.886853	0.601949
AAEL005400-RI	0	0.201928	0.100964
AAEL005400-RJ	0.350041	0.253674	0.301858
AAEL005400-RK	0	2.34e-07	1.17e-07
AAEL005400-RL	0	0.570831	0.285415
AAEL005400-RM	0	0.64522	0.32261
AAEL005400-RN	2.3597	5.21831	3.789
AAEL005400-RO	0	0.17043	0.085215
AAEL005400-RP	0	0	0
AAEL005400-RQ	1.91214	1.84227	1.87721
AAEL005400-RR	0	0.49265	0.246325
AAEL005400-RS	1.53e-07	0.180427	0.0902136
AAEL005400-RT	0	0	0
AAEL005400-RU	0.323352	0.553878	0.438615
AAEL005400-RV	0.585418	0	0.292709
AAEL005400-RW	0	1.08e-06	5.4e-07
AAEL005400-RX	0.324173	1.24568	0.784926
AAEL005400-RY	0	1.41e-08	7.05e-09
AAEL005400-RZ	2.33839	0.811921	1.57516
AAEL005401-RA	225.321	216.919	221.12
AAEL005401-RB	1395.99	1130.07	1263.03
AAEL005402-RB	1.65049	3.79742	2.72396
AAEL005403-RA	3.77774	3.78898	3.78336
AAEL005405-RA	22.9406	21.8371	22.3888
AAEL005406-RA	3.4231	6.47482	4.94896
AAEL005407-RD	1.96147	6.21422	4.08784
AAEL005407-RE	1.66432	2.1442	1.90426
AAEL005408-RA	12.0341	18.8578	15.4459
AAEL005409-RA	0.0497518	0.0597312	0.0547415
AAEL005410-RA	13.4158	15.8148	14.6153
AAEL005411-RA	5.70438	5.27487	5.48963
AAEL005411-RB	4.88003	6.3721	5.62606
AAEL005411-RC	0	0.630923	0.315462
AAEL005412-RA	1.32878	0.702415	1.0156
AAEL005412-RB	3.45e-10	0	1.725e-10
AAEL005412-RC	0	0	0
AAEL005413-RB	9.79403	11.7338	10.7639
AAEL005414-RA	31.7565	32.7644	32.2604
AAEL005415-RA	11.8526	12.765	12.3088
AAEL005417-RA	1.54817	2.80806	2.17812
AAEL005417-RB	0	0.168385	0.0841925
AAEL005419-RA	7.80835	10.2746	9.04148
AAEL005420-RA	2.1249	0.705409	1.41515
AAEL005422-RA	5.57128	19.5947	12.583
AAEL005423-RA	1.68297	2.67181	2.17739
AAEL005423-RB	0	0	0
AAEL005425-RB	2.09647	7.16225	4.62936
AAEL005426-RA	2.76508	8.18311	5.4741
AAEL005428-RA	396.405	281.004	338.704
AAEL005429-RA	59.9854	35.2213	47.6033
AAEL005429-RB	5.89e-08	17.7738	8.8869
AAEL005431-RA	0.187601	0.349964	0.268782
AAEL005432-RA	158.902	145.569	152.236
AAEL005432-RB	69.6633	76.2733	72.9683
AAEL005432-RC	6.70819	5.40295	6.05557
AAEL005437-RA	0	0.0012734	0.0006367
AAEL005437-RB	0	0.0394204	0.0197102
AAEL005438-RA	1.55053	4.71817	3.13435
AAEL005440-RC	0.0502643	0.0147849	0.0325246
AAEL005440-RD	0	0.120475	0.0602375
AAEL005440-RE	0	0	0
AAEL005440-RF	0	0.143802	0.071901
AAEL005444-RB	0	0.115548	0.057774
AAEL005444-RC	0	0	0
AAEL005444-RD	0	0	0
AAEL005500-RA	17.5896	20.1067	18.8482
AAEL005500-RB	2.92587	1.93822	2.43205
AAEL005504-RC	3.00633	8.68254	5.84443
AAEL005507-RA	0.0621663	0	0.0310832
AAEL005507-RB	1.19e-07	0	5.95e-08
AAEL005507-RC	0	0.0532058	0.0266029
AAEL005507-RD	5.34e-10	0.346537	0.173269
AAEL005507-RE	1.96e-08	0	9.8e-09
AAEL005507-RF	4.61e-07	0	2.305e-07
AAEL005507-RG	4.42e-06	2.76e-10	2.21014e-06
AAEL005507-RH	1.14e-06	1.47e-10	5.70074e-07
AAEL005507-RI	0.00255327	0	0.00127663
AAEL005508-RA	54.7021	74.8892	64.7956
AAEL005510-RA	1.022	3.24324	2.13262
AAEL005510-RB	0	0.129237	0.0646185
AAEL005515-RF	4.07861	9.5e-09	2.03931
AAEL005515-RG	22.103	16.877	19.49
AAEL005515-RH	24.1501	16.3024	20.2263
AAEL005515-RI	178.689	207.891	193.29
AAEL005515-RJ	1.25e-07	3.71352	1.85676
AAEL005515-RK	0	0	0
AAEL005515-RL	113.957	203.181	158.569
AAEL005515-RM	72.012	115.265	93.6385
AAEL005518-RA	0.240963	0.542297	0.39163
AAEL005520-RC	8.95438	8.76313	8.85876
AAEL005520-RD	0	4.69365	2.34682
AAEL005520-RE	9.90541	6.76411	8.33476
AAEL005521-RA	4.46895	8.6432	6.55607
AAEL005522-RB	10.9478	17.4977	14.2227
AAEL005524-RA	259.003	232.895	245.949
AAEL005524-RB	22.0784	30.5021	26.2903
AAEL005526-RB	0	1.61819	0.809095
AAEL005526-RC	2.87505	1.75147	2.31326
AAEL005526-RD	0	1.9523	0.97615
AAEL005526-RE	0	1.1e-06	5.5e-07
AAEL005526-RF	0	0.0110369	0.00551845
AAEL005527-RA	10.057	11.1198	10.5884
AAEL005528-RA	7.15951	18.8842	13.0219
AAEL005528-RB	5.49121	6.64449	6.06785
AAEL005530-RA	0	0.574891	0.287446
AAEL005531-RA	1.07882	2.0296	1.55421
AAEL005533-RB	0.118838	0.247618	0.183228
AAEL005552-RC	0	0.410941	0.205471
AAEL005552-RD	6.76651	15.9401	11.3533
AAEL005602-RB	0.155156	2.38583	1.27049
AAEL005606-RB	0.813759	0.169273	0.491516
AAEL005606-RC	0	14.1269	7.06345
AAEL005615-RB	22.3354	17.6249	19.9802
AAEL005626-RB	2.15101	3.85468	3.00284
AAEL005628-RB	57.4056	71.0848	64.2452
AAEL005629-RA	2769.72	2939.7	2854.71
AAEL005630-RA	0	0	0
AAEL005631-RB	1.87054	5.05991	3.46523
AAEL005633-RA	0	0.07941	0.039705
AAEL005634-RB	1.92e-07	0.971284	0.485642
AAEL005634-RC	0	9.13e-06	4.565e-06
AAEL005634-RD	0	1.28479	0.642395
AAEL005634-RE	0	0.119456	0.059728
AAEL005634-RF	0	0.281228	0.140614
AAEL005634-RG	0	0.321673	0.160836
AAEL005634-RH	0.0073675	1.05171	0.529539
AAEL005635-RA	13.1762	24.4282	18.8022
AAEL005635-RB	0.902256	2.31409	1.60817
AAEL005638-RA	107.89	118.645	113.267
AAEL005639-RA	27.3944	20.5505	23.9725
AAEL005714-RB	0	0	0
AAEL005714-RC	0	0	0
AAEL005714-RD	0	0	0
AAEL005714-RE	0	0	0
AAEL005714-RF	0	0	0
AAEL005717-RA	0.893594	2.90332	1.89846
AAEL005719-RA	4.20124	9.13334	6.66729
AAEL005722-RB	3912.18	3532.59	3722.39
AAEL005726-RB	0.253934	0.342781	0.298357
AAEL005726-RC	0.27826	9.36e-08	0.13913
AAEL005726-RD	2.47965	3.48217	2.98091
AAEL005726-RE	2.68953	3.71453	3.20203
AAEL005726-RF	0.433755	1.01052	0.722138
AAEL005726-RG	0	0	0
AAEL005726-RH	0	0.343508	0.171754
AAEL005768-RA	0.311845	1.28486	0.798352
AAEL005770-RA	3.10054	2.00308	2.55181
AAEL005772-RA	0.376389	1.15279	0.76459
AAEL005773-RB	0.081174	0.0892248	0.0851994
AAEL005774-RB	0.071107	0.0405237	0.0558153
AAEL005774-RC	3.59e-05	1.04709	0.523563
AAEL005774-RD	0	7.14794	3.57397
AAEL005774-RE	0.0722965	2e-08	0.0361483
AAEL005777-RA	0	1.67536	0.83768
AAEL005777-RB	0	0	0
AAEL005777-RC	0	0	0
AAEL005777-RD	0	0.167897	0.0839485
AAEL005787-RA	0.101307	0.0449552	0.0731311
AAEL005789-RA	0.0680781	0.646089	0.357084
AAEL005790-RA	15.9759	7.55768	11.7668
AAEL005790-RB	0	6.22819	3.11409
AAEL005790-RC	0	5.61792	2.80896
AAEL005791-RB	0.109704	2.36006	1.23488
AAEL005792-RA	0	0.206875	0.103438
AAEL005793-RA	0.279177	0	0.139589
AAEL005793-RB	0	0.390274	0.195137
AAEL005796-RA	2.47709	5.46222	3.96966
AAEL005796-RB	20.2583	32.0643	26.1613
AAEL005798-RA	112.393	120.576	116.484
AAEL005799-RA	0	4.23e-06	2.115e-06
AAEL005799-RB	8.07829	12.5491	10.3137
AAEL005802-RA	6.38886	14.4961	10.4425
AAEL005803-RB	0.239437	0.657157	0.448297
AAEL005803-RC	0	0.280666	0.140333
AAEL005808-RA	32.2999	31.1544	31.7272
AAEL005811-RA	9.32592	10.8466	10.0863
AAEL005813-RB	3.16392	14.2874	8.72566
AAEL005816-RA	15.6899	22.2916	18.9907
AAEL005817-RA	2792.16	2926.54	2859.35
AAEL005819-RA	35.6523	37.679	36.6656
AAEL005822-RA	20.4234	19.0501	19.7368
AAEL005825-RA	8.20708	11.0261	9.61659
AAEL005826-RA	6.63463	15.0982	10.8664
AAEL005827-RB	0.623175	4.9989	2.81104
AAEL005829-RA	0	0.0271183	0.0135592
AAEL005830-RA	29.6688	35.4403	32.5545
AAEL005831-RB	4.26407	5.75229	5.00818
AAEL005832-RA	18.9105	27.8594	23.3849
AAEL005832-RB	35.2349	45.1907	40.2128
AAEL005834-RA	0	0.0423196	0.0211598
AAEL005837-RA	3.0258	4.02886	3.52733
AAEL005837-RB	0.36464	0.442266	0.403453
AAEL005838-RB	0.564815	3.79736	2.18109
AAEL005839-RA	2.30174	4.19966	3.2507
AAEL005839-RB	0.179555	0.285605	0.23258
AAEL005840-RB	0.129591	0	0.0647955
AAEL005840-RC	0	0.131538	0.065769
AAEL005943-RB	2.84706	5.10113	3.9741
AAEL005944-RA	26.5691	27.872	27.2205
AAEL005945-RB	0.0762053	0.0457319	0.0609686
AAEL005946-RA	118.695	122.148	120.421
AAEL005947-RA	15.6211	23.1901	19.4056
AAEL005947-RB	14.8681	17.7428	16.3055
AAEL005950-RAA	0	0	0
AAEL005950-RAB	0	0.784601	0.3923
AAEL005950-RAC	0	0	0
AAEL005950-RD	0	0	0
AAEL005950-RE	0	0	0
AAEL005950-RF	0.000103117	0.098425	0.0492641
AAEL005950-RG	0	0.268951	0.134475
AAEL005950-RH	0	0	0
AAEL005950-RI	0	0	0
AAEL005950-RJ	0.0110955	0	0.00554775
AAEL005950-RK	0.699679	0	0.34984
AAEL005950-RL	0	0	0
AAEL005950-RM	0.00161251	0	0.000806255
AAEL005950-RN	0.350354	0.0472023	0.198778
AAEL005950-RO	5.80703	5.72629	5.76666
AAEL005950-RP	0	0	0
AAEL005950-RQ	0	0	0
AAEL005950-RR	6.93205	9.85821	8.39513
AAEL005950-RS	0	0	0
AAEL005950-RT	0.0668845	0.457012	0.261948
AAEL005950-RU	0	0	0
AAEL005950-RV	0	0.116239	0.0581195
AAEL005950-RW	0	6.39e-10	3.195e-10
AAEL005950-RX	0	0.0550729	0.0275365
AAEL005950-RY	0	1.29e-07	6.45e-08
AAEL005950-RZ	0.13311	0	0.066555
AAEL005951-RC	2.17e-10	0.679196	0.339598
AAEL005951-RD	1.54961	26.2853	13.9175
AAEL005952-RB	0	0	0
AAEL005952-RC	0	0.0363404	0.0181702
AAEL005952-RD	0	0	0
AAEL005952-RE	0	0	0
AAEL005952-RF	0	3.05e-09	1.525e-09
AAEL005992-RB	8.32438	5.57658	6.95048
AAEL006063-RA	0.326889	1.15009	0.73849
AAEL006064-RA	0	0.0184239	0.00921195
AAEL006065-RA	23.5244	20.696	22.1102
AAEL006065-RB	0	0	0
AAEL006066-RA	22.9502	28.2987	25.6244
AAEL006067-RA	2.86729	6.4895	4.6784
AAEL006069-RB	27.3525	30.9528	29.1527
AAEL006070-RA	66.3849	68.0445	67.2147
AAEL006071-RB	0	0.0899752	0.0449876
AAEL006071-RC	0	0.459977	0.229989
AAEL006071-RD	0.798001	0	0.399
AAEL006071-RE	0	2.40905	1.20453
AAEL006071-RF	0	0.0217641	0.0108821
AAEL006071-RG	0	0	0
AAEL006071-RH	0	0	0
AAEL006071-RI	5.22e-11	0.00301054	0.00150527
AAEL006071-RJ	9.08e-11	0.00540373	0.00270187
AAEL006071-RK	0.902344	0	0.451172
AAEL006073-RA	0.57365	4.64955	2.6116
AAEL006075-RA	1.82354	2.86821	2.34587
AAEL006077-RA	0	0	0
AAEL006077-RB	0	0.0486359	0.024318
AAEL006080-RA	0.835078	4.26706	2.55107
AAEL006087-RA	8.2721	18.0263	13.1492
AAEL006113-RA	10.5697	11.4921	11.0309
AAEL006113-RB	0.0861909	0	0.0430955
AAEL006113-RC	0	0.255077	0.127538
AAEL006113-RD	0	0.613362	0.306681
AAEL006113-RE	0	1.02753	0.513765
AAEL006113-RF	2.00524	1.02859	1.51692
AAEL006113-RG	3.21219	2.68676	2.94948
AAEL006113-RH	1.25515	1.01612	1.13563
AAEL006113-RI	1.80258	1.57716	1.68987
AAEL006113-RJ	0	0	0
AAEL006114-RB	0	0	0
AAEL006116-RB	2.11598	2.84389	2.47994
AAEL006118-RA	5.15614	8.1588	6.65747
AAEL006120-RB	0	2.52e-08	1.26e-08
AAEL006120-RC	0.480287	1.45466	0.967474
AAEL006120-RD	0	1.79e-05	8.95e-06
AAEL006120-RE	0	0.102671	0.0513355
AAEL006120-RF	0.127619	0.128452	0.128036
AAEL006157-RB	0	0	0
AAEL006158-RA	98.5942	108.566	103.58
AAEL006159-RA	0.392546	0.0934467	0.242996
AAEL006160-RB	0	0	0
AAEL006160-RC	0	0	0
AAEL006160-RD	0	0.0133434	0.0066717
AAEL006161-RB	0.709825	0.622078	0.665952
AAEL006164-RA	0.684396	0.688641	0.686519
AAEL006166-RA	3.2883	5.35621	4.32226
AAEL006167-RB	0	0.0102225	0.00511125
AAEL006168-RA	0	0.204487	0.102244
AAEL006169-RA	44.3929	66.3635	55.3782
AAEL006189-RA	13.3766	15.6474	14.512
AAEL006191-RB	0	0.170573	0.0852865
AAEL006191-RC	0.286307	0.211963	0.249135
AAEL006191-RD	0	0	0
AAEL006191-RE	0	2.60444	1.30222
AAEL006191-RF	0	0.432695	0.216347
AAEL006193-RA	6.27297	8.39618	7.33457
AAEL006193-RB	0	1.4791	0.73955
AAEL006193-RC	0	0	0
AAEL006196-RA	47.7033	39.6512	43.6773
AAEL006196-RB	2.47974	3.71272	3.09623
AAEL006196-RC	0	0.779246	0.389623
AAEL006196-RD	0.611634	0.0796039	0.345619
AAEL006197-RA	0.177489	1.24258	0.710035
AAEL006202-RA	0	0	0
AAEL006208-RA	0.271422	6.72956	3.50049
AAEL006209-RA	0.189848	5.18455	2.6872
AAEL006287-RA	0	0.118728	0.059364
AAEL006293-RA	0	0.315876	0.157938
AAEL006293-RB	0	0	0
AAEL006293-RC	0	0.0183347	0.00916735
AAEL006293-RD	0.0429231	0.0637362	0.0533297
AAEL006294-RA	4.96139	6.68344	5.82241
AAEL006294-RB	0	0.385887	0.192943
AAEL006294-RC	0	0	0
AAEL006362-RA	14.8991	20.0481	17.4736
AAEL006362-RB	0	0.281962	0.140981
AAEL006362-RC	0	0.0363925	0.0181963
AAEL006362-RD	2.43381	1.18525	1.80953
AAEL006363-RC	0	0.133538	0.066769
AAEL006363-RD	0	0	0
AAEL006363-RE	16.7732	7.36557	12.0694
AAEL006363-RF	1.75923	3.2908	2.52501
AAEL006363-RG	4.6272	14.7182	9.6727
AAEL006363-RH	0	0.632772	0.316386
AAEL006364-RA	27.7206	48.2455	37.983
AAEL006364-RB	2.40512	5.67101	4.03806
AAEL006364-RC	10.3145	6.86017	8.58733
AAEL006364-RD	5.07771	5.59904	5.33837
AAEL006364-RE	7.79242	16.6002	12.1963
AAEL006365-RA	0	0.0290543	0.0145272
AAEL006367-RA	9.66951	10.4003	10.0349
AAEL006368-RA	0	0	0
AAEL006370-RB	0.432825	0.429192	0.431009
AAEL006370-RC	2.35267	4.34354	3.3481
AAEL006372-RA	269.637	229.34	249.488
AAEL006372-RB	12.998	6.2578	9.6279
AAEL006372-RC	25.6869	12.6051	19.146
AAEL006373-RB	7.58085	8.20366	7.89225
AAEL006374-RA	1.8629	4.39987	3.13138
AAEL006376-RA	4.58424	5.77436	5.1793
AAEL006377-RA	0.623218	1.13494	0.879079
AAEL006378-RA	0	0	0
AAEL006381-RA	20.6231	12.8841	16.7536
AAEL006382-RA	0	3.36396	1.68198
AAEL006382-RB	1.3377	1.22099	1.27934
AAEL006383-RA	0	0.0389787	0.0194893
AAEL006384-RA	0.773754	1.28326	1.02851
AAEL006589-RA	1.84632	4.22843	3.03737
AAEL006589-RB	0.928875	1.29064	1.10976
AAEL006589-RC	1.17693	0.701445	0.939188
AAEL006589-RD	0.956424	3.06087	2.00865
AAEL006593-RB	0	4.65e-07	2.325e-07
AAEL006593-RC	0	0.102292	0.051146
AAEL006597-RA	0	0.0694478	0.0347239
AAEL006707-RA	7.52533	7.38257	7.45395
AAEL006708-RA	2.1024	2.72431	2.41336
AAEL006711-RA	1.95537	0.425375	1.19037
AAEL006711-RB	0	0	0
AAEL006711-RC	0	0.898811	0.449406
AAEL006711-RD	0	0	0
AAEL006711-RE	0.0442728	0.699199	0.371736
AAEL006711-RF	0	1.882	0.941
AAEL006711-RG	0.931427	0.390792	0.66111
AAEL006711-RH	0	1.80023	0.900115
AAEL006711-RI	0	0.659497	0.329748
AAEL006711-RJ	2.72789	9.5002	6.11404
AAEL006712-RA	0.541244	13.1369	6.83907
AAEL006713-RA	7.14431	16.9751	12.0597
AAEL006715-RA	1.89139	7.73672	4.81405
AAEL006817-RA	0	0	0
AAEL006818-RB	0	0.200055	0.100028
AAEL006819-RA	6.17138	11.3723	8.77184
AAEL006820-RA	37.16	159.212	98.186
AAEL006822-RA	0.220298	0.4586	0.339449
AAEL006822-RB	0	0	0
AAEL006822-RC	0.362907	1.0441	0.703504
AAEL006822-RD	0	0.638721	0.31936
AAEL006822-RE	1.03839	0.0923145	0.565352
AAEL006822-RF	0	0	0
AAEL006822-RG	0	0.165254	0.082627
AAEL006822-RH	0.0206045	4.33e-09	0.0103023
AAEL006822-RI	0.286736	6.9e-08	0.143368
AAEL006822-RJ	0.0590273	1.31e-08	0.0295137
AAEL006822-RK	0	5.17e-09	2.585e-09
AAEL006822-RL	0	8.93e-08	4.465e-08
AAEL006823-RA	47.2515	35.6316	41.4415
AAEL006824-RA	0	1.78328	0.89164
AAEL006825-RB	0.0774848	0.0768182	0.0771515
AAEL006826-RB	0	7.94e-08	3.97e-08
AAEL006826-RC	0	0.012184	0.006092
AAEL006826-RD	0	0	0
AAEL006827-RA	0	2.1859	1.09295
AAEL006827-RB	0.169682	0.167066	0.168374
AAEL006829-RA	55.5912	48.6747	52.133
AAEL006830-RA	0	39.9026	19.9513
AAEL006832-RB	1.32659	0.922896	1.12474
AAEL006859-RA	22.9901	29.9794	26.4847
AAEL006860-RA	2839.31	5075.71	3957.51
AAEL006936-RC	0.853314	1.28409	1.0687
AAEL006936-RD	0	0	0
AAEL006936-RE	0	0	0
AAEL006936-RF	0	0	0
AAEL006936-RG	1.62e-08	1.31e-08	1.465e-08
AAEL006936-RH	0.52981	0.257942	0.393876
AAEL006937-RA	3.17146	7.89515	5.53331
AAEL006938-RA	3.96605	6.15215	5.0591
AAEL006944-RB	0	0	0
AAEL006944-RC	0	0.103017	0.0515085
AAEL006947-RA	0.528384	0.604187	0.566285
AAEL006948-RB	0	0	0
AAEL006948-RC	0.506496	0	0.253248
AAEL006948-RD	0	0.432402	0.216201
AAEL006948-RE	0.66901	0.856672	0.762841
AAEL006948-RF	0.120016	2.02686	1.07344
AAEL006948-RG	0	0	0
AAEL006948-RH	3.19193	4.03648	3.61421
AAEL006948-RI	0	0.334876	0.167438
AAEL006948-RJ	0	0.139756	0.069878
AAEL006949-RA	1.12872	1.58854	1.35863
AAEL006949-RB	3.64268	7.11415	5.37842
AAEL006949-RC	0.488072	0	0.244036
AAEL006950-RA	2.34065	5.07754	3.7091
AAEL006951-RA	3.92295	8.66366	6.29331
AAEL006951-RB	13.2835	12.5835	12.9335
AAEL006951-RC	8.22515	7.45858	7.84187
AAEL006955-RB	0.023386	0	0.011693
AAEL006955-RC	0.0131041	0.268183	0.140644
AAEL006956-RA	12.8563	23.6043	18.2303
AAEL006956-RB	12.1871	10.734	11.4605
AAEL006957-RB	0.0529265	0.584867	0.318897
AAEL006958-RB	0	3.17609	1.58804
AAEL006958-RC	1.60823	1.86197	1.7351
AAEL006958-RD	0	0.0755782	0.0377891
AAEL006958-RE	0	0.0553935	0.0276967
AAEL007029-RA	30.9907	37.8044	34.3976
AAEL007029-RB	0	0	0
AAEL007029-RC	0	0.0719118	0.0359559
AAEL007029-RD	0	0	0
AAEL007029-RE	0	0	0
AAEL007029-RF	0	0	0
AAEL007029-RG	0.0562563	0.596412	0.326334
AAEL007029-RH	0	0	0
AAEL007029-RI	0	0.255314	0.127657
AAEL007029-RJ	0.871701	1.22288	1.04729
AAEL007029-RK	0	0	0
AAEL007029-RL	0.129623	0.302484	0.216053
AAEL007029-RM	1.30433	1.31306	1.30869
AAEL007029-RN	0.225453	0.379851	0.302652
AAEL007029-RO	0	0	0
AAEL007030-RA	5.34491	7.7681	6.5565
AAEL007030-RB	14.6398	18.461	16.5504
AAEL007030-RC	0.946594	1.91212	1.42936
AAEL007030-RD	0	0.143717	0.0718585
AAEL007034-RA	2.08296	4.39884	3.2409
AAEL007038-RB	3.41656	3.22124	3.3189
AAEL007039-RB	3.25772	1.59695	2.42734
AAEL007040-RA	0	0.106334	0.053167
AAEL007040-RB	0	0.909167	0.454583
AAEL007040-RC	0	0.217832	0.108916
AAEL007078-RA	87.1928	109.537	98.3649
AAEL007198-RA	0.125888	0.195897	0.160892
AAEL007202-RA	3.38084	5.44468	4.41276
AAEL007203-RA	7.8472	10.8168	9.332
AAEL007205-RB	0	0.022472	0.011236
AAEL007205-RC	0.0689519	0	0.0344759
AAEL007209-RA	11.1168	11.8643	11.4905
AAEL007211-RA	1.36025	5.39597	3.37811
AAEL007217-RA	0.168711	0.122477	0.145594
AAEL007248-RB	2.12426	6.12264	4.12345
AAEL007268-RB	0	0.414098	0.207049
AAEL007268-RC	0.00574004	0.0798757	0.0428079
AAEL007268-RD	4.87e-05	0.000516302	0.000282501
AAEL007343-RA	9.49346	11.3725	10.433
AAEL007383-RE	175.596	150.207	162.901
AAEL007383-RF	119.355	228.843	174.099
AAEL007383-RG	281.911	202.836	242.374
AAEL007385-RC	1.34164	16.1905	8.76607
AAEL007385-RD	11.2831	0.0739383	5.67852
AAEL007385-RE	84.1461	78.066	81.1061
AAEL007385-RF	448.17	483.494	465.832
AAEL007386-RA	0.173099	0.0514203	0.11226
AAEL007387-RB	4.19e-08	2.38259	1.1913
AAEL007387-RC	4.53355	1.30338	2.91846
AAEL007388-RB	0	0.109955	0.0549775
AAEL007388-RC	4.68e-10	0	2.34e-10
AAEL007388-RD	0.411986	0.0583894	0.235188
AAEL007389-RA	0	0	0
AAEL007455-RB	0	0	0
AAEL007456-RB	0.477029	4.31258	2.3948
AAEL007458-RB	0	2.52055	1.26028
AAEL007461-RB	2.50479	5.02216	3.76348
AAEL007464-RA	1.08702	2.46897	1.778
AAEL007465-RB	6.01e-06	0.650805	0.325406
AAEL007465-RC	0	0	0
AAEL007465-RD	0.316595	5.22e-09	0.158298
AAEL007468-RA	2.36932	7.16435	4.76684
AAEL007469-RA	5.3798	19.547	12.4634
AAEL007476-RB	9.20099	14.7516	11.9763
AAEL007480-RA	2.16614	4.76992	3.46803
AAEL007481-RA	6.40673	6.46104	6.43389
AAEL007482-RA	3.83604	6.69976	5.2679
AAEL007483-RB	0.0286756	0.232829	0.130752
AAEL007484-RA	25.1446	22.5072	23.8259
AAEL007484-RB	8.84813	18.0366	13.4424
AAEL007487-RA	0.734834	2.90993	1.82238
AAEL007487-RB	0	0	0
AAEL007487-RC	0	0	0
AAEL007492-RA	1.57859	9.14015	5.35937
AAEL007493-RA	0	0.326544	0.163272
AAEL007494-RA	337.89	340.992	339.441
AAEL007495-RA	0.417681	1.1958	0.80674
AAEL007495-RB	0.463932	1.22788	0.845906
AAEL007500-RA	0	0.112207	0.0561035
AAEL007501-RA	9.01597	9.51103	9.2635
AAEL007501-RB	20.0717	19.3943	19.733
AAEL007507-RA	0	0	0
AAEL007507-RB	0	0.0228143	0.0114071
AAEL007508-RA	0.204794	0.18067	0.192732
AAEL007509-RA	3.65859	4.66766	4.16312
AAEL007509-RB	1.08897	3.45058	2.26978
AAEL007511-RB	0	0.0263316	0.0131658
AAEL007512-RA	1.41881	5.77993	3.59937
AAEL007514-RA	0	0	0
AAEL007514-RB	0	0.0543614	0.0271807
AAEL007518-RB	0.0290681	0.0103942	0.0197311
AAEL007518-RC	0	0.0534257	0.0267128
AAEL007518-RD	0	0	0
AAEL007518-RE	0.31599	0.123526	0.219758
AAEL007518-RF	0	0	0
AAEL007518-RG	0	0	0
AAEL007518-RH	0	0	0
AAEL007518-RI	0	0	0
AAEL007518-RJ	0.258413	0.0605591	0.159486
AAEL007518-RK	0.293805	7.19e-09	0.146903
AAEL007518-RL	0	0.987738	0.493869
AAEL007518-RM	0.497563	0.488957	0.49326
AAEL007518-RN	0	0	0
AAEL007519-RA	0	0.0329077	0.0164538
AAEL007579-RA	0.0495424	0	0.0247712
AAEL007579-RB	0	0	0
AAEL007579-RC	0.000332687	0	0.000166344
AAEL007584-RA	0	23.1868	11.5934
AAEL007586-RA	13.5301	21.1694	17.3498
AAEL007587-RB	0	0.295606	0.147803
AAEL007591-RA	10.7333	2.85948	6.79639
AAEL007592-RA	29.3171	29.0425	29.1798
AAEL007593-RA	0.516942	2.99568	1.75631
AAEL007595-RB	7.65065	15.1585	11.4046
AAEL007595-RC	0.413879	0.179868	0.296874
AAEL007595-RD	11.2188	5.9059	8.56235
AAEL007597-RA	0	4.73087	2.36544
AAEL007597-RB	0.134335	1.66756	0.900948
AAEL007598-RA	0	0	0
AAEL007607-RA	0	0.586542	0.293271
AAEL007615-RA	0	0	0
AAEL007619-RB	0.819215	0.23642	0.527818
AAEL007619-RC	1.81e-07	1.46092	0.73046
AAEL007641-RB	0	0.280406	0.140203
AAEL007642-RA	2.84496	3.86457	3.35476
AAEL007642-RB	0	0.836817	0.418409
AAEL007644-RA	6.54985	3.85227	5.20106
AAEL007646-RB	0	0	0
AAEL007646-RC	0	0.0374857	0.0187428
AAEL007646-RD	0	0	0
AAEL007646-RE	0	0	0
AAEL007646-RF	0	0	0
AAEL007647-RA	12.834	25.4853	19.1596
AAEL007648-RA	0	0	0
AAEL007650-RA	52.005	63.2462	57.6256
AAEL007651-RA	5.52529	3.99563	4.76046
AAEL007651-RB	4.31805	7.48557	5.90181
AAEL007651-RC	0.611864	0.358452	0.485158
AAEL007651-RD	0.990546	1.12489	1.05772
AAEL007652-RA	0.243082	0.933262	0.588172
AAEL007653-RA	2.24156	1.89531	2.06844
AAEL007654-RA	1.64983	3.41676	2.53329
AAEL007655-RA	9.00046	9.00707	9.00377
AAEL007656-RA	16.1486	21.6527	18.9006
AAEL007657-RA	0.0850744	39.0101	19.5476
AAEL007658-RB	0.0003007	2.16396	1.08213
AAEL007658-RC	0	0	0
AAEL007658-RD	0	0	0
AAEL007658-RE	1.88e-08	1.86788	0.93394
AAEL007658-RF	2.89e-08	0.52702	0.26351
AAEL007658-RG	2.16257	0.845705	1.50414
AAEL007658-RH	0	0	0
AAEL007658-RI	3.09383	2.46497	2.7794
AAEL007658-RJ	0.000367983	2.67711	1.33874
AAEL007658-RK	0.728923	0	0.364461
AAEL007658-RL	0	8.93e-05	4.465e-05
AAEL007658-RM	7.14e-06	4.95e-05	2.832e-05
AAEL007658-RN	0	0.606869	0.303434
AAEL007658-RO	1.56875	1.1617	1.36523
AAEL007658-RP	0	0	0
AAEL007658-RQ	0	0	0
AAEL007658-RR	0	0	0
AAEL007658-RS	4.2e-09	0.000376082	0.000188043
AAEL007658-RT	0.0185124	1.32774	0.673126
AAEL007658-RU	2.83e-05	0.512956	0.256492
AAEL007659-RA	0.666944	1.51201	1.08948
AAEL007660-RA	19.3475	22.3228	20.8351
AAEL007661-RA	0.155086	3.73375	1.94442
AAEL007661-RB	3.52e-06	0	1.76e-06
AAEL007662-RD	0	3.17828	1.58914
AAEL007662-RE	0	0.470164	0.235082
AAEL007662-RF	0.000813993	0.588902	0.294858
AAEL007662-RG	1.12362	1.59549	1.35956
AAEL007662-RH	4.21096	3.04882	3.62989
AAEL007662-RI	3.07252	5.19189	4.1322
AAEL007662-RJ	8.67621	17.4572	13.0667
AAEL007662-RK	3.54845	1.17868	2.36356
AAEL007662-RL	1.32552	3.49702	2.41127
AAEL007662-RM	1.16009	4.88879	3.02444
AAEL007664-RB	0	0.479949	0.239975
AAEL007667-RA	0.14487	0.0464262	0.0956481
AAEL007668-RA	29.0831	28.5655	28.8243
AAEL007741-RA	0.312632	0.514805	0.413718
AAEL007744-RA	2.34421	3.92267	3.13344
AAEL007750-RA	3.51371	2.87792	3.19582
AAEL007752-RA	447.13	400.534	423.832
AAEL007754-RB	7.44814	8.56014	8.00414
AAEL007757-RA	0.306612	2.91419	1.6104
AAEL007758-RA	107.282	40.7592	74.0206
AAEL007760-RA	15.327	18.7202	17.0236
AAEL007762-RA	12.0536	19.1651	15.6093
AAEL007788-RB	4.90287	5.62674	5.2648
AAEL007789-RA	0	0.189409	0.0947045
AAEL007790-RA	7.34409	15.2241	11.2841
AAEL007792-RB	40.3017	36.5413	38.4215
AAEL007793-RA	0.0934487	0.355572	0.22451
AAEL007820-RC	14.8021	31.7044	23.2533
AAEL007822-RB	13.0783	18.2654	15.6718
AAEL007824-RA	2654.18	2926.43	2790.3
AAEL007825-RB	5.49806	10.2461	7.87208
AAEL007830-RA	0.00592188	1.20105	0.603486
AAEL007830-RB	0.456926	1.83613	1.14653
AAEL007831-RA	0	0	0
AAEL007832-RB	0.303318	0.211417	0.257367
AAEL007835-RA	1.49065	1.60321	1.54693
AAEL007838-RB	0	1.08334	0.54167
AAEL007838-RC	0	0.146962	0.073481
AAEL007838-RD	2.56909	6.20527	4.38718
AAEL007839-RB	3.91002	5.74522	4.82762
AAEL007872-RB	1.24976	1.05825	1.154
AAEL007892-RA	67.3743	77.64	72.5071
AAEL007904-RA	4.34845	11.2572	7.80282
AAEL007915-RB	0	0	0
AAEL007915-RC	23.5318	47.8661	35.699
AAEL007915-RD	0	0	0
AAEL007915-RE	1.79982	2.37522	2.08752
AAEL007915-RF	0	0	0
AAEL007915-RG	0	0	0
AAEL007915-RH	0	0	0
AAEL007915-RI	0.00471821	8.9218	4.46326
AAEL007915-RJ	15.801	1.88419	8.84259
AAEL007915-RK	0	0	0
AAEL007915-RL	0	0.232189	0.116095
AAEL007915-RM	0	0.0833347	0.0416673
AAEL007992-RA	1.87691	0	0.938455
AAEL007992-RB	0.931806	3.53422	2.23301
AAEL007993-RA	8.46566	12.2758	10.3707
AAEL008003-RA	0	0.0313302	0.0156651
AAEL008010-RB	0	0.020053	0.0100265
AAEL008010-RC	0	0.0106981	0.00534905
AAEL008012-RB	0	0.040274	0.020137
AAEL008013-RA	0	0	0
AAEL008013-RB	0	0	0
AAEL008013-RC	0.209857	0.0357505	0.122804
AAEL008014-RA	0	0.0797662	0.0398831
AAEL008015-RA	6.00725	13.2033	9.60528
AAEL008017-RA	0.34706	0.610432	0.478746
AAEL008018-RA	0.122862	0.0683249	0.0955934
AAEL008020-RA	2.57384	7.70408	5.13896
AAEL008021-RA	4.59365	6.23666	5.41516
AAEL008021-RB	0	0.367924	0.183962
AAEL008021-RC	5.83e-07	0.246996	0.123498
AAEL008022-RA	0.50656	0.920416	0.713488
AAEL008024-RA	7.5512	6.80136	7.17628
AAEL008024-RB	2.56552	4.63901	3.60227
AAEL008024-RC	1.94e-10	0.479067	0.239534
AAEL008024-RD	11.9803	12.5433	12.2618
AAEL008025-RA	49.9441	46.4255	48.1848
AAEL008027-RB	0.49075	0.0359959	0.263373
AAEL008027-RC	0	0.236171	0.118085
AAEL008027-RD	1.43238	3.97872	2.70555
AAEL008028-RA	33.3766	20.06	26.7183
AAEL008028-RB	0.261047	0.150563	0.205805
AAEL008028-RC	0	0.263049	0.131524
AAEL008029-RA	0	0.38903	0.194515
AAEL008029-RB	0	0	0
AAEL008029-RC	0	1.99432	0.99716
AAEL008029-RD	0	0	0
AAEL008031-RB	0.0282423	0.0225342	0.0253883
AAEL008031-RC	0	0	0
AAEL008031-RD	0.087234	0.0733515	0.0802927
AAEL008032-RA	0	0.0452394	0.0226197
AAEL008032-RB	0	0	0
AAEL008071-RB	2.54e-06	7.94e-06	5.24e-06
[truncated: 32,478 more rows]

## Sheet: SailfishN7
Name	M7N1	M7N2	M7N3	N7 Average
AAEL000016-RA	22.2859	10.3871	16.7994	16.4908
AAEL000024-RA	0	0	0	0
AAEL000024-RB	0	0	0	0
AAEL000024-RC	0.144172	0.132026	0.0633371	0.113178
AAEL000029-RB	0	0	0	0
AAEL000064-RA	1.14827	0.0664454	0.136054	0.450256
AAEL000079-RB	0	0.0413949	0.0162113	0.0192021
AAEL000079-RC	0.431829	0.0261051	0.0106306	0.156188
AAEL000079-RD	0	0	0	0
AAEL000084-RA	37.9097	31.9087	31.5896	33.8027
AAEL000084-RB	2.6091	1.41417	2.7077	2.24366
AAEL000101-RA	22.3008	3.82026	3.58805	9.90304
AAEL000102-RB	25.7434	53.1742	56.4046	45.1074
AAEL000106-RA	4.77654	1.24386	2.37495	2.79845
AAEL000107-RA	0.998213	1.65669	1.89097	1.51529
AAEL000108-RA	0.155319	0	0.0585007	0.0712732
AAEL000109-RA	0.371799	0.0623017	0.529896	0.321332
AAEL000111-RA	2.0306	0.686653	0.081719	0.932991
AAEL000113-RA	0	0	0	0
AAEL000115-RA	19.9258	10.9342	10.6108	13.8236
AAEL000116-RB	0.663234	0.564886	0.399441	0.54252
AAEL000118-RA	5.64762	5.14517	4.69231	5.1617
AAEL000119-RA	32.8147	2.49269	1.72343	12.3436
AAEL000122-RA	1.51558	0.891205	1.33574	1.24751
AAEL000122-RB	0.785718	1.18564	0.956156	0.975838
AAEL000123-RA	0	0.0114789	0.117546	0.0430083
AAEL000127-RA	3.17249	3.30999	1.78264	2.75504
AAEL000127-RB	0	0	0	0
AAEL000134-RA	0.0999395	0.315894	0.355804	0.257213
AAEL000137-RB	0.43881	0.30106	0.0482329	0.262701
AAEL000137-RC	0	0	0.380061	0.126687
AAEL000137-RD	6.09691	0.421445	0.451004	2.32312
AAEL000137-RE	5.65126	0	0	1.88375
AAEL000137-RF	6.92661	0	0	2.30887
AAEL000138-RA	478.822	90.8753	97.2091	222.302
AAEL000140-RA	0.735154	2.07236	2.72595	1.84449
AAEL000140-RB	0	0	0	0
AAEL000143-RA	62.1339	13.4839	12.134	29.2506
AAEL000146-RA	0.469043	7.15629	7.06072	4.89535
AAEL000147-RA	12.5095	9.60548	5.51996	9.21165
AAEL000148-RA	2.73227	1.05378	1.40813	1.73139
AAEL000149-RA	3.43969	3.42093	3.24121	3.36728
AAEL000154-RA	0.0104159	0	0.0245217	0.0116459
AAEL000157-RA	0.485067	1.24058	1.07281	0.932819
AAEL000219-RA	165.544	68.9613	54.0813	96.1955
AAEL000223-RA	0.184524	57.0928	81.9259	46.4011
AAEL000229-RA	0	0	0	0
AAEL000230-RA	15.2452	8.30445	7.76019	10.4366
AAEL000231-RA	48.5031	18.686	18.6499	28.613
AAEL000239-RB	0.0933537	0.263154	0.480298	0.278935
AAEL000241-RA	9.45437	7.221	7.89984	8.19174
AAEL000242-RA	0	1.21e-06	3.44e-06	1.55e-06
AAEL000242-RB	0	3.36e-09	1.57e-08	6.35333e-09
AAEL000242-RC	0	7.35e-09	3.22e-08	1.31833e-08
AAEL000242-RD	0	0.252546	0.254235	0.168927
AAEL000242-RE	0.0253864	0	0	0.00846213
AAEL000242-RF	0	1.87e-09	9.19e-09	3.68667e-09
AAEL000243-RB	0.0164917	0.0169746	0.0279645	0.0204769
AAEL000244-RA	31.2575	47.4358	56.9857	45.2263
AAEL000247-RA	0.00827725	0.00260065	0	0.00362597
AAEL000247-RB	0.317587	0.0857504	0.0678122	0.15705
AAEL000249-RA	0	0	0	0
AAEL000249-RB	0	0	0	0
AAEL000249-RC	0	0	0.0649096	0.0216365
AAEL000249-RD	0.104218	0.268442	0	0.12422
AAEL000249-RE	0	0	0	0
AAEL000250-RB	0	0	0	0
AAEL000250-RC	0	0	0.075847	0.0252823
AAEL000250-RD	0	1.16e-05	0	3.86667e-06
AAEL000250-RE	0	0.0133767	0	0.0044589
AAEL000250-RF	0	0	0	0
AAEL000251-RA	0	0.124804	0.164436	0.0964133
AAEL000252-RA	0.0176577	0.127353	0.0465401	0.0638503
AAEL000254-RB	0.00118148	0.000123271	0.000108443	0.000471065
AAEL000254-RC	0	0	0	0
AAEL000254-RD	0.863643	0.0683996	0.0349666	0.322336
AAEL000384-RB	0	0	0	0
AAEL000609-RA	0	0	0.0812566	0.0270855
AAEL000626-RA	0.607287	0	0	0.202429
AAEL000626-RB	90.9166	30.1347	22.8288	47.96
AAEL000626-RC	0.614174	0.640062	0.0802078	0.444815
AAEL000626-RD	15.6406	19.7777	19.9808	18.4664
AAEL000980-RA	1.22247	0.43576	0.500032	0.719421
AAEL000980-RB	0.254815	0.336087	0.0578158	0.216239
AAEL000982-RA	14.2533	8.59732	7.7055	10.1854
AAEL000983-RA	16.5873	2.19662	1.73422	6.83938
AAEL000983-RB	0.818643	0	0.225798	0.348147
AAEL000983-RE	0	0.36375	0	0.12125
AAEL000983-RF	0.280157	8.78769	12.2729	7.11358
AAEL000983-RG	0.000608121	0	0	0.000202707
AAEL000983-RH	0.216742	0	0.358566	0.191769
AAEL000997-RB	0	0.274063	0.198664	0.157576
AAEL001005-RA	165.391	238.126	254.32	219.279
AAEL001008-RA	12.3393	3.59036	3.8624	6.59735
AAEL001009-RB	1.29551	0.446132	0.431659	0.724434
AAEL001054-RB	0.147783	2.0729	0.700846	0.973843
AAEL001059-RA	0.618705	0	0.0629879	0.227231
AAEL001060-RA	0.0162551	0.00836653	0.0643089	0.0296435
AAEL001060-RB	0	0	0	0
AAEL001060-RC	0	0	0	0
AAEL001061-RA	0.506381	0.0533253	0	0.186569
AAEL001061-RB	832.035	24.4212	9.13678	288.531
AAEL001061-RC	31.5403	4.13725	2.06532	12.581
AAEL001062-RB	12.8601	5.93322	4.32485	7.70606
AAEL001063-RA	0	0	0	0
AAEL001065-RA	26.9862	16.7829	18.0646	20.6112
AAEL001067-RA	0	0	0	0
AAEL001068-RA	0.246188	0	0.117949	0.121379
AAEL001071-RA	1.62459	2.71533	6.89207	3.744
AAEL001073-RA	0	0.0325802	0.0139066	0.0154956
AAEL001074-RB	0	0	0	0
AAEL001074-RC	0.0200428	0.0176832	0.0226568	0.0201276
AAEL001074-RD	0	0	0	0
AAEL001077-RA	1.08377	0.542676	0.340812	0.655753
AAEL001080-RA	14.1249	8.93948	8.44564	10.5033
AAEL001082-RA	1.13968	3.64916	1.70507	2.16464
AAEL001084-RA	0.273597	0.0939068	0.120242	0.162582
AAEL001085-RA	2.61291	15.2376	11.4882	9.77957
AAEL001086-RB	0.779914	1.18783	1.05018	1.00597
AAEL001087-RB	511.591	1.48684	0.693402	171.257
AAEL001088-RB	1.08732	1.19233	1.64105	1.3069
AAEL001088-RC	1.33367	4.11754	6.70142	4.05088
AAEL001089-RA	43.1766	6.7794	6.52075	18.8256
AAEL001090-RA	0	0	0.0246307	0.00821023
AAEL001091-RA	86.8338	10.7533	9.90464	35.8306
AAEL001092-RA	142.633	53.4273	59.3559	85.1387
AAEL001094-RA	40.3723	8.79693	7.25572	18.8083
AAEL001094-RB	49.0193	7.18122	5.78279	20.6611
AAEL001094-RC	0.442917	0	7.61e-05	0.147664
AAEL001094-RD	2.07709	1.43982	0.25483	1.25725
AAEL001095-RA	0.298352	0.374111	0.478766	0.383743
AAEL001098-RA	4.49819	0.189634	0.700471	1.7961
AAEL001099-RA	1.25056	3.63954	3.86456	2.91822
AAEL001099-RB	1.56542	1.15e-08	3.8e-06	0.521808
AAEL001099-RC	1.12832	8.44e-09	2.85e-06	0.376108
AAEL001228-RA	0	0	0.0051051	0.0017017
AAEL001228-RB	0	0	0.00189616	0.000632053
AAEL001229-RA	0	0	0	0
AAEL001231-RB	0	0	0	0
AAEL001231-RC	0	0	0	0
AAEL001231-RD	0	0	0	0
AAEL001231-RE	0	0	0	0
AAEL001231-RF	0	0	0	0
AAEL001231-RG	0	0	0	0
AAEL001231-RH	0	0	0	0
AAEL001231-RI	0	0	0	0
AAEL001231-RJ	0	0	0	0
AAEL001236-RA	16.9746	15.3807	14.842	15.7324
AAEL001290-RA	0	0	0	0
AAEL001319-RB	0	0	0.117169	0.0390563
AAEL001351-RA	5.15115	0.71456	0.913721	2.25981
AAEL001427-RA	82.5468	9.96041	6.72002	33.0757
AAEL001433-RB	0	0.26547	0	0.08849
AAEL001433-RC	0.345056	0	0.209506	0.184854
AAEL001433-RD	0	0.589	0.374246	0.321082
AAEL001439-RA	75.225	21.8085	22.0347	39.6894
AAEL001442-RB	0.210319	0.342998	0.0732357	0.208851
AAEL001442-RC	0	0	0	0
AAEL001442-RD	0	0	0	0
AAEL001442-RE	1.1e-06	3.01e-06	0	1.37e-06
AAEL001442-RF	0	2.93e-11	0.200539	0.0668463
AAEL001442-RG	0	0	0	0
AAEL001446-RB	2.63137	3.72843	0.182684	2.18083
AAEL001446-RC	1.23623	0	0.2262	0.487477
AAEL001446-RD	0	1.71473	4.19065	1.96846
AAEL001446-RE	0.543184	0.235427	0.385036	0.387882
AAEL001446-RF	0	0	0.157247	0.0524157
AAEL001446-RG	2.76456	0.768916	0	1.17783
AAEL001446-RH	4.79706	0	0	1.59902
AAEL001446-RI	0	3.27423	4.94193	2.73872
AAEL001447-RA	0	0	0	0
AAEL001447-RB	0	0	0	0
AAEL001447-RC	0	0	0	0
AAEL001447-RD	1.29663	0.148266	0.479483	0.64146
AAEL001447-RE	0	0	0	0
AAEL001447-RF	0.172625	0.355304	0	0.175976
AAEL001447-RG	0.699905	0.267966	0	0.322624
AAEL001447-RH	5.05756	1.39764	1.4384	2.6312
AAEL001447-RI	5.75e-06	2.84e-06	8.9e-06	5.83e-06
AAEL001448-RA	1.8923	3.89253	7.0643	4.28304
AAEL001448-RB	0.296576	0.388204	1.33822	0.674333
AAEL001448-RC	0	1.94768	0.0162237	0.654635
AAEL001448-RD	0	3.48172	2.71477	2.0655
AAEL001448-RE	2.54266	3.34712	1.302	2.39726
AAEL001448-RF	0	0.503624	0.216894	0.240173
AAEL001448-RG	0	0	0	0
AAEL001448-RH	2.91467	8.66e-09	0.00051762	0.971729
AAEL001448-RI	0.222735	0.0818164	0.33778	0.21411
AAEL001449-RA	1.26454	0.87453	0.799003	0.979358
AAEL001449-RB	0	0	0	0
AAEL001451-RA	3.36177	4.60671	5.0543	4.34093
AAEL001457-RA	0	0.182275	0.0889102	0.0903951
AAEL001459-RA	0	0	0	0
AAEL001459-RB	0.135162	0.339521	0.342204	0.272296
AAEL001461-RA	1.78332	0	0	0.59444
AAEL001464-RB	0.396514	0	0	0.132171
AAEL001464-RC	0.0586406	0.50218	0.556394	0.372405
AAEL001464-RD	0	0.275298	0	0.091766
AAEL001464-RE	0.0411337	0.702399	0.4558	0.399778
AAEL001464-RF	0.212659	0	0	0.0708863
AAEL001597-RA	3.27867	1.01698	0.737454	1.6777
AAEL001600-RA	0.317433	0	0.733526	0.35032
AAEL001600-RB	0	1.42048	0.231042	0.550507
AAEL001600-RC	1.76552	0	4.92e-05	0.588523
AAEL001601-RA	6.3553	3.08203	1.54201	3.65978
AAEL001601-RB	0.825921	3.90988	5.88275	3.53952
AAEL001601-RC	0	0	0	0
AAEL001601-RD	6.3553	3.08203	1.54201	3.65978
AAEL001604-RB	0.0179967	0.0147765	0	0.0109244
AAEL001604-RC	0.194001	1.22752	2.50198	1.30783
AAEL001607-RA	0	0	1.57963	0.526543
AAEL001607-RB	23.0597	15.801	13.6366	17.4991
AAEL001610-RA	1.10268	2.44544	1.6148	1.72097
AAEL001612-RA	0.384301	0.387208	0.349783	0.373764
AAEL001615-RA	79.6092	20.412	16.8752	38.9655
AAEL001616-RA	0.356708	4.36754	5.03982	3.25469
AAEL001616-RB	1.86423	0.0996384	0.000371609	0.654747
AAEL001616-RC	1.03396	1.3697	0.305494	0.903051
AAEL001619-RA	20.2202	10.9175	11.2098	14.1158
AAEL001622-RA	6.62703	9.43837	7.3872	7.81753
AAEL001622-RB	0.165802	3.30682	2.6171	2.02991
AAEL001623-RA	67.3927	165.656	185.742	139.597
AAEL001624-RA	0.355651	0.171074	0.249892	0.258872
AAEL001625-RA	1.03472	0.973154	0.247216	0.751697
AAEL001626-RA	119.87	12.279	11.4621	47.8704
AAEL001627-RA	3.83354	6.73565	8.12095	6.23005
AAEL001628-RA	0	0.0696366	0.837645	0.302427
AAEL001631-RA	1.59664	1.60986	2.16367	1.79006
AAEL002047-RA	4999.94	2112.19	2437.71	3183.28
AAEL002048-RA	5.32323	12.7612	15.7936	11.2927
AAEL002048-RB	3.26667	5.11726	5.22376	4.5359
AAEL002072-RA	0	0.0291949	0.0747134	0.0346361
AAEL002077-RA	57.8665	48.6908	48.9329	51.8301
AAEL002078-RA	7.66366	8.46876	7.95279	8.0284
AAEL002084-RB	7.94331	7.44513	8.80503	8.06449
AAEL002135-RA	31.9593	9.92907	9.85321	17.2472
AAEL002137-RD	19.7266	28.7319	32.4873	26.9819
AAEL002139-RA	6.78607	7.88096	6.57098	7.07934
AAEL002140-RA	56.7947	30.1645	39.9719	42.3104
AAEL002141-RA	0.00539126	0.0166508	0.0853104	0.0357842
AAEL002142-RA	1.5418	2.8609	2.26576	2.22282
AAEL002145-RA	0.319274	1.3013	1.21773	0.946101
AAEL002145-RB	4.84446	4.94189	5.86579	5.21738
AAEL002148-RA	49.7979	13.8389	10.5983	24.745
AAEL002152-RA	3.83727	7.68837	7.86218	6.46261
AAEL002153-RA	0	0.0578332	0.0740024	0.0439452
AAEL002155-RA	30.2749	29.897	26.2221	28.798
AAEL002157-RA	3.60576	1.64267	3.50341	2.91728
AAEL002157-RB	4.37379	2.03839	2.22405	2.87874
AAEL002158-RA	440.1	342.215	275.302	352.539
AAEL002159-RA	3.18789	4.51982	4.32632	4.01134
AAEL002160-RA	92.8476	150.51	167.002	136.787
AAEL002161-RA	520.76	35.2636	35.6138	197.212
AAEL002163-RA	52.5002	39.4989	41.7466	44.5819
AAEL002165-RA	116.397	26.5469	19.4356	54.1265
AAEL002167-RA	0.0235087	0	0	0.00783623
AAEL002169-RB	1.78577	3.50985	3.61237	2.96933
AAEL002170-RA	41.4973	33.1273	35.818	36.8142
AAEL002170-RB	0	0	0	0
AAEL002173-RB	0.0246274	0	0	0.00820913
AAEL002174-RA	33.5223	40.0782	44.4815	39.3607
AAEL002175-RA	32.9228	29.3195	24.9132	29.0518
AAEL002176-RB	36.7847	2.78812	2.98847	14.1871
AAEL002177-RA	0	0	0	0
AAEL002178-RB	1.42e-08	1.45e-10	6.74e-08	2.72483e-08
AAEL002178-RC	17.6212	7.44164	7.72686	10.9299
AAEL002178-RD	4.30203	20.332	17.609	14.081
AAEL002211-RA	0	0	0	0
AAEL002287-RB	0	2.04823	3.34023	1.79615
AAEL002287-RC	6.94518	7.44258	2.83995	5.74257
AAEL002287-RD	1.89788	1.61e-07	2.77514	1.55767
AAEL002321-RA	0.0235737	0.0137109	0.661542	0.232942
AAEL002321-RB	1.53e-07	1.47e-07	0.0882371	0.0294125
AAEL002321-RC	1.04675	0.518989	6.51e-08	0.521913
AAEL002331-RA	14.3276	10.341	8.88277	11.1838
AAEL002335-RB	0.177474	0	0.115231	0.0975683
AAEL002335-RC	0	0.848133	0.702034	0.516722
AAEL002343-RA	0	0.0788776	0.0505481	0.0431419
AAEL002343-RB	0.385531	0.428907	0.540486	0.451641
AAEL002346-RC	0.531385	1.07668	1.43014	1.01273
AAEL002346-RD	5.90401	6.25778	5.50993	5.89057
AAEL002346-RE	1.65342	3.36958	3.10779	2.71026
AAEL002348-RB	3.60269	0.0843214	0.0404791	1.2425
AAEL002354-RB	3.67e-08	3.05e-07	3.7e-07	2.37233e-07
AAEL002354-RC	0.00859646	0.0423459	0.0187519	0.0232314
AAEL002354-RD	0.000668165	0	0.00199945	0.000889205
AAEL002354-RE	5.89e-06	3.95e-05	3.16e-05	2.56633e-05
AAEL002354-RF	0.0370869	0	0.0675108	0.0348659
AAEL002357-RA	0	0	0	0
AAEL002357-RB	0	5.05e-05	3.43e-05	2.82667e-05
AAEL002357-RC	0	3.08e-07	0	1.02667e-07
AAEL002357-RD	0	0	0.107314	0.0357713
AAEL002357-RE	0	0.0480829	0.0182756	0.0221195
AAEL002357-RF	0	0.0760556	0.0278061	0.0346206
AAEL002357-RG	0.0168335	0.0485681	0.0560474	0.040483
AAEL002357-RH	0.0466405	0	0	0.0155468
AAEL002357-RI	0.116447	0.309488	0.305236	0.243724
AAEL002407-RB	16.4166	21.3611	22.799	20.1922
AAEL002408-RB	0.0444999	0.314162	0.603536	0.320733
AAEL002410-RB	0.0551437	0.00718437	0.00706968	0.0231326
AAEL002410-RC	0.089108	0.011375	0.010766	0.037083
AAEL002411-RC	560.421	141.073	147.801	283.098
AAEL002411-RD	386.982	47.2056	48.4038	160.864
AAEL002412-RA	1.69997	3.37704	2.51866	2.53189
AAEL002413-RA	0.499405	0.0494498	0.0126616	0.187172
AAEL002415-RC	0	0.0611425	0.311757	0.1243
AAEL002415-RD	0	0	0.670937	0.223646
AAEL002415-RE	0	0	0.222778	0.0742593
AAEL002415-RF	1.57941	2.21125	2.5999	2.13019
AAEL002415-RG	0.587832	0	0	0.195944
AAEL002415-RH	0	0.33139	0	0.110463
AAEL002416-RA	40.1106	13.2355	13.7352	22.3604
AAEL002416-RB	11.2715	5.22467	2.03115	6.17577
AAEL002417-RA	0	0.309741	0.734006	0.347916
AAEL002417-RB	0.0893768	15.4568	18.3596	11.3019
AAEL002417-RC	0.376855	0.584035	0.179603	0.380164
AAEL002417-RD	0	1.26777	0.426856	0.564875
AAEL002417-RE	0	1.94274	0.142301	0.695014
AAEL002417-RF	0.534425	7.98307	5.71516	4.74422
AAEL002417-RG	0	0.533315	0	0.177772
AAEL002417-RH	0.445259	0	0	0.14842
AAEL002417-RI	0	0	0	0
AAEL002417-RJ	0	0	0	0
AAEL002417-RK	0	1.16241	0.309367	0.490592
AAEL002417-RL	0	0	6.95e-05	2.31667e-05
AAEL002417-RM	0	0	0	0
AAEL002417-RN	0	0.172329	0	0.057443
AAEL002417-RO	0	0.0477754	0.179613	0.0757961
AAEL002417-RP	0	0	0	0
AAEL002418-RA	71.1446	15.1617	12.9666	33.091
AAEL002419-RA	8.19867	3.01261	3.73934	4.98354
AAEL002422-RB	0	0	0	0
AAEL002422-RC	0	0	0	0
AAEL002422-RD	0	0	0	0
AAEL002422-RE	0	0	0	0
AAEL002422-RF	0	0	0	0
AAEL002422-RG	0.0277088	0	0	0.00923627
AAEL002422-RH	0	0	0	0
AAEL002422-RI	0	0	0	0
AAEL002422-RJ	0	0	0	0
AAEL002422-RK	0	0	0	0
AAEL002422-RL	0	0	0	0
AAEL002422-RM	0	0	0	0
AAEL002422-RN	0	0	0	0
AAEL002422-RO	0	0	0	0
AAEL002422-RP	0	0	0	0
AAEL002423-RA	1.04611	2.74797	1.59463	1.79624
AAEL002425-RA	0	0	0	0
AAEL002426-RA	16.2627	21.2405	20.52	19.3411
AAEL002427-RB	0.40997	1.89303	1.67319	1.3254
AAEL002428-RB	1.03e-07	5.27e-05	0	1.7601e-05
AAEL002428-RC	15.8488	12.2469	10.3957	12.8305
AAEL002428-RD	0	0	0.104191	0.0347303
AAEL002428-RE	4.90042	0.78739	0.302411	1.99674
AAEL002430-RA	5.14146	5.08425	2.29621	4.17397
AAEL002432-RA	0.132852	0.919521	0.428189	0.493521
AAEL002433-RA	10.8067	6.28751	6.62582	7.90668
AAEL002435-RA	1.35846	3.25274	2.96259	2.5246
AAEL002435-RB	0.782666	3.04583	3.44707	2.42519
AAEL002435-RC	0.128256	0.580792	0.817821	0.508956
AAEL002435-RD	0.000139626	4.99417	2.36353	2.45261
AAEL002435-RE	9.86571	14.981	18.5434	14.4634
AAEL002435-RF	0.455913	0	0.219215	0.225043
AAEL002436-RD	7.73125	4.65446	2.81327	5.06633
AAEL002436-RE	1.17145	1.30123	3.20426	1.89231
AAEL002436-RF	13.2241	8.63995	7.5557	9.80658
AAEL002438-RB	0	0	0	0
AAEL002450-RA	4.1327	3.17307	3.99257	3.76611
AAEL002451-RB	0.0279796	0.0656537	0.0570284	0.0502206
AAEL002453-RB	1.35636	3.52819	2.87428	2.58628
AAEL002454-RA	0.156044	0.857458	0.548383	0.520628
AAEL002455-RB	0.566059	1.69846	1.44783	1.23745
AAEL002455-RC	8.65e-09	0.719173	0.838419	0.519197
AAEL002455-RD	0	0	0.158505	0.052835
AAEL002499-RA	0.535851	0.802335	1.1724	0.836862
AAEL002501-RA	84.5666	49.8885	45.5976	60.0176
AAEL002501-RB	121.845	17.3509	23.3612	54.1857
AAEL002502-RA	1.28922	3.4591	3.25955	2.66929
AAEL002503-RA	28.7414	9.85986	17.8415	18.8143
AAEL002504-RB	835.494	160.551	164.813	386.953
AAEL002506-RA	0.209092	1.24597	0.593186	0.682749
AAEL002508-RA	77.8245	39.331	34.8934	50.683
AAEL002510-RA	0.978751	0.00201646	0	0.326922
AAEL002510-RB	36.637	28.4908	22.5662	29.2313
AAEL002510-RC	0	0.34201	0	0.114003
AAEL002510-RD	11.8493	20.9176	19.439	17.402
AAEL002512-RA	0.48895	2.56548	1.52267	1.5257
AAEL002514-RB	2.99948	2.4041	1.89518	2.43292
AAEL002518-RB	0	0	0	0
AAEL002518-RC	0	0	0	0
AAEL002518-RD	0.039275	0.0499035	0.0848731	0.0580172
AAEL002518-RE	0	0	0	0
AAEL002518-RF	0.10012	0.0266989	0.0939929	0.0736039
AAEL002520-RA	3.10598	0.0459189	0.616354	1.25608
AAEL002520-RB	0.388699	0	0	0.129566
AAEL002523-RA	64.4	23.7442	22.3084	36.8175
AAEL002524-RA	66.9382	0.289997	0.0616107	22.4299
AAEL002525-RA	2.02181	5.47286	4.56379	4.01949
AAEL002526-RA	510.921	95.8253	93.1095	233.285
AAEL002527-RA	17.1485	79.7227	80.3904	59.0872
AAEL002527-RB	0	11.9674	4.55116	5.50619
AAEL002529-RA	8.95915	4.21518	4.56149	5.91194
AAEL002531-RA	2.45416	2.69859	2.16095	2.4379
AAEL002534-RA	7125.34	3531.76	3479.06	4712.05
AAEL002537-RB	0.0139418	0.0243829	0.00612835	0.0148177
AAEL002538-RA	0.229577	0.453557	0.196359	0.293164
AAEL002539-RA	9.06252	63.192	64.7214	45.6586
AAEL002539-RB	4.1909	10.0178	7.03196	7.08022
AAEL002541-RB	37.0239	0.0872606	0.0159546	12.3757
AAEL002542-RA	144.049	92.1	102.184	112.778
AAEL002543-RB	7.37e-05	0	0	2.45667e-05
AAEL002543-RC	0	0	0	0
AAEL002543-RD	3.05139	4.42535	3.70078	3.72584
AAEL002543-RE	1.51628	0	0	0.505427
AAEL002544-RA	25.7368	0.679979	2.31804	9.57827
AAEL002544-RB	9.33832	8.53144	2.97156	6.94711
AAEL002546-RA	0	0.986042	1.01581	0.667284
AAEL002547-RA	0.0798326	0.0822121	0.118403	0.0934826
AAEL002548-RB	2.5984	4.60498	5.27876	4.16071
AAEL002549-RA	0.584133	0.974612	0.554418	0.704388
AAEL002550-RE	0	0	0	0
AAEL002550-RF	0.375419	0	0.201963	0.192461
AAEL002550-RG	0	4.83296	4.62641	3.15312
AAEL002551-RB	16.6865	38.1587	39.1845	31.3432
AAEL002554-RC	0.00501772	0	0	0.00167257
AAEL002554-RD	0.13684	2.38096	0.667047	1.06162
AAEL002554-RE	0.0261772	1.38614	1.56781	0.993376
AAEL002554-RF	0.000963742	0	0	0.000321247
AAEL002555-RB	0.864686	0.17344	0.169263	0.402463
AAEL002555-RC	0	0	0	0
AAEL002555-RD	0	0	0.100619	0.0335397
AAEL002555-RE	0.617314	0.800751	1.2146	0.877555
AAEL002555-RF	0	4.05369	7.70506	3.91958
AAEL002556-RB	0.439544	1.02616	0.808151	0.757952
AAEL002557-RB	0	0	4.08e-07	1.36e-07
AAEL002557-RC	0	0	0	0
AAEL002557-RD	0	1.22e-09	0.300593	0.100198
AAEL002557-RE	1.31981	1.06704	0.390836	0.925895
AAEL002557-RF	0	0.0644725	0	0.0214908
AAEL002557-RG	0	0	0	0
AAEL002559-RB	1.1226	0.334404	0.258277	0.57176
AAEL002560-RA	1.12124	51.9109	59.6445	37.5589
AAEL002560-RB	0	0	0	0
AAEL002560-RC	0	0.174138	0.436552	0.203563
AAEL002562-RA	20.3056	3.59772	8.81875	10.9074
AAEL002562-RB	4.75202	13.0937	10.7162	9.52064
AAEL002563-RA	10.7035	4.20289	4.23225	6.37955
AAEL002564-RA	0	0	0.0269699	0.00898997
AAEL002565-RA	0	0	0	0
AAEL002565-RB	0.0131152	0.311349	0.212227	0.178897
AAEL002565-RC	0	0	0	0
AAEL002565-RD	0	0	0	0
AAEL002565-RE	0	0	0	0
AAEL002565-RF	0	0	0	0
AAEL002565-RG	0.0377108	0.154042	0.282219	0.157991
AAEL002565-RH	0.143162	7.22702	5.32354	4.23124
AAEL002566-RA	0	0	0.0133013	0.00443377
AAEL002567-RA	0.0633747	0.32767	0.0852043	0.15875
AAEL002567-RB	0	0	0	0
AAEL002567-RC	0.178198	0	0.031446	0.0698813
AAEL002567-RD	0	0	0	0
AAEL002567-RE	0	0	0	0
AAEL002569-RB	6.77e-09	0.409385	0.565106	0.32483
AAEL002569-RC	0.818177	0.381653	0.212725	0.470852
AAEL002569-RD	0	0	0	0
AAEL002571-RB	0	0	0.0474709	0.0158236
AAEL002571-RC	0	0	0	0
AAEL002571-RD	0	0	0	0
AAEL002571-RE	0	0.0391478	0	0.0130493
AAEL002571-RF	0	0	0	0
AAEL002571-RG	0	0	0	0
AAEL002571-RH	0	0	0	0
AAEL002571-RI	0	0	0	0
AAEL002571-RJ	0	0	0	0
AAEL002572-RA	14.9205	170.751	127.053	104.242
AAEL002574-RA	0.078939	0	0	0.026313
AAEL002575-RB	0	0.0167051	0.0106952	0.00913343
AAEL002575-RC	0	0	0	0
AAEL002733-RB	0	42.2348	45.2407	29.1585
AAEL002733-RC	0.464139	0	0.935616	0.466585
AAEL002733-RD	0.160771	3.94148	0.782779	1.62834
AAEL002733-RE	0	34.5453	27.8759	20.8071
AAEL002740-RB	0	0.0174833	0.0368679	0.0181171
AAEL002740-RC	0	0.000712571	0.00197309	0.00089522
AAEL002741-RB	2.16486	0.0713931	0.0406316	0.758962
AAEL002742-RB	275.643	0.220482	0.0470326	91.9702
AAEL002745-RB	0.00928938	0.00318729	0.0408363	0.017771
AAEL002754-RB	0	0	0.0168752	0.00562507
AAEL002764-RC	54.1517	72.2424	62.4416	62.9452
AAEL002764-RD	13.6817	2.71	8.96224	8.45131
AAEL002764-RE	82.4725	48.5593	59.5617	63.5312
AAEL002766-RA	7.09274	5.02716	5.54067	5.88686
AAEL002769-RB	0	0.157694	0.102076	0.08659
AAEL002769-RC	0	0	0	0
AAEL002769-RD	0	0	0	0
AAEL002769-RE	0.026227	0	0.067991	0.031406
AAEL002773-RA	0.0966619	0.179289	0.0509496	0.108967
AAEL002775-RA	5.8181	1.51714	0.852963	2.7294
AAEL002775-RB	1.46211	1.26711	0.507511	1.07891
AAEL002783-RA	51.9777	22.2476	20.5308	31.5854
AAEL002784-RA	26.5333	17.4425	21.2667	21.7475
AAEL002785-RA	0.495276	0.510142	0.223342	0.409587
AAEL002786-RA	0	0.0577691	0.00528622	0.0210184
AAEL002786-RB	0.0166825	0	0	0.00556083
AAEL002786-RC	7.37e-07	0	0	2.45667e-07
AAEL002790-RA	5.16447	2.47952	1.85387	3.16595
AAEL002791-RA	2.4489	12.899	11.4275	8.92513
AAEL002792-RA	0.194873	0	0	0.0649577
AAEL002796-RA	12.8363	3.24303	2.71724	6.26552
AAEL002796-RB	5.31571	0.144948	0	1.82022
AAEL002800-RA	0.0704337	0.0724991	0.0967595	0.0798974
AAEL002801-RA	3.73162	2.91244	1.83096	2.82501
AAEL002803-RB	0	0	0	0
AAEL002803-RC	0.0131318	0.189365	0.103857	0.102118
AAEL002804-RA	17.8653	44.2299	53.8646	38.6533
AAEL002805-RA	55.4281	8.60014	7.37855	23.8023
AAEL002808-RA	10.7025	13.2303	14.106	12.6796
AAEL002809-RB	10.2789	6.56771	3.91445	6.92035
AAEL002809-RC	2.00331	0	0.372929	0.79208
AAEL002810-RA	0.290183	0.282194	0.170044	0.247474
AAEL002811-RA	4.65643	308.39	233.544	182.197
AAEL002812-RA	42.1117	13.4476	16.2276	23.929
AAEL002813-RA	1372.35	259.384	268.523	633.419
AAEL002814-RA	0	1.31472	0.98542	0.766713
AAEL002816-RA	4.24388	3.46605	4.97834	4.22942
AAEL002817-RB	5.38662	4.058	3.14196	4.19553
AAEL002856-RA	13.7981	10.019	9.55654	11.1245
AAEL002859-RB	11.7314	41.1866	44.5955	32.5045
AAEL002860-RA	46.5425	37.0437	35.8021	39.7961
AAEL002861-RA	22.8057	29.0491	33.63	28.4949
AAEL002863-RA	2.43267	2.96068	3.80346	3.0656
AAEL002864-RA	0.620926	3.83632	4.86507	3.10744
AAEL002866-RA	24.8983	46.3214	55.0372	42.0856
AAEL002867-RA	39.517	58.4176	52.0472	49.9939
AAEL002869-RA	1.5584	3.59298	4.64539	3.26559
AAEL002870-RC	195.009	51.6805	45.0438	97.2444
AAEL002874-RB	8.20409	3.4896	4.27609	5.32326
AAEL002874-RC	0	0.433035	0	0.144345
AAEL002876-RB	0	0	0	0
AAEL002876-RC	0	0	0	0
AAEL002876-RD	0	0	0	0
AAEL002876-RE	0	0	0	0
AAEL002876-RF	0	0	0	0
AAEL002876-RG	0	0	0	0
AAEL002876-RH	0	0	0	0
AAEL002876-RI	0	0	0	0
AAEL002876-RJ	0	0	0	0
AAEL002876-RK	0	0	0	0
AAEL002876-RL	0	0	0	0
AAEL002876-RM	0	0	0	0
AAEL002876-RN	0	1.06e-07	1.29e-07	7.83333e-08
AAEL002876-RO	0	0.0253213	0.0108144	0.0120452
AAEL002876-RP	0	0	0	0
AAEL002877-RA	0	0	0	0
AAEL002877-RB	0	0	0	0
AAEL002877-RC	0.100884	0.135837	0.173943	0.136888
AAEL002878-RA	0	0	0	0
AAEL002879-RAA	0.00298487	0.170694	1.93762	0.703766
AAEL002879-RAB	0.0888734	2.63219	1.28793	1.33633
AAEL002879-RAC	0	0	0	0
AAEL002879-RAD	0	0	0	0
AAEL002879-RB	4.59383	8.83654	6.51052	6.64696
AAEL002879-RC	1.23e-06	1.96e-07	1.84e-07	5.36667e-07
AAEL002879-RD	1.30912	2.2752	2.64148	2.07527
AAEL002879-RE	0.187256	0.385108	5.00274	1.85837
AAEL002879-RF	0.000128005	2.49e-05	1.67e-06	5.1525e-05
AAEL002879-RG	6.83e-07	1.75e-06	6.49e-08	8.32633e-07
AAEL002879-RH	9.3497	11.8507	10.9918	10.7307
AAEL002879-RI	4.32e-06	1.79e-05	1.19e-06	7.80333e-06
AAEL002879-RJ	0	0.318173	0.393889	0.237354
AAEL002879-RK	0	0	0	0
AAEL002879-RL	0	0	0	0
AAEL002879-RM	0	0	0	0
AAEL002879-RN	6.0497	7.86588	3.27795	5.73118
AAEL002879-RO	0	0	0	0
AAEL002879-RP	0.0034999	0.000451285	1.34e-06	0.00131751
AAEL002879-RQ	0	0	0	0
AAEL002879-RR	0	0	0	0
AAEL002879-RS	0	0	0	0
AAEL002879-RT	0.293131	0.130053	0.353266	0.258817
AAEL002879-RU	0.0614849	0.0223657	0	0.0279502
AAEL002879-RV	2.30089	4.3674	3.78506	3.48445
AAEL002879-RW	0	0	0	0
AAEL002879-RX	0.00494417	6.38e-05	6.29e-06	0.00167142
AAEL002879-RY	0.000194781	4.58e-05	4.46e-06	8.16803e-05
AAEL002879-RZ	0.124392	0.00109465	5.85e-06	0.0418308
AAEL002880-RA	0.163075	0	0.0268873	0.0633208
AAEL002881-RA	3334.62	556.764	506.328	1465.9
AAEL002882-RA	0	0	0	0
AAEL002886-RA	23.9415	16.4487	14.67	18.3534
AAEL002886-RB	83.8852	131.182	125.424	113.497
AAEL002886-RC	1.87675	2.00069	1.63744	1.83829
AAEL002886-RD	164.214	30.2631	48.6306	81.0359
AAEL002887-RA	11.5933	29.6929	31.2437	24.1766
AAEL002887-RB	0.278062	0.89001	0.918357	0.695476
AAEL002887-RC	0.673435	3.44e-05	0.0330526	0.235507
AAEL002887-RD	0	0.0943473	0	0.0314491
AAEL002887-RE	0	0	0	0
AAEL002887-RF	0	0	0	0
AAEL002887-RG	0	0.543608	0.555321	0.36631
AAEL002887-RH	0	2.48711	3.89732	2.12814
AAEL002887-RI	0	0.615158	0.338591	0.317916
AAEL002888-RA	5.61557	0.958015	0.747687	2.44042
AAEL002888-RB	21.7608	7.50799	7.63597	12.3016
AAEL002890-RA	6.94726	9.44045	5.94476	7.44416
AAEL002890-RB	0	0.586822	1.96198	0.849601
AAEL002890-RC	0	0	0	0
AAEL002890-RD	0	0	0.149039	0.0496797
AAEL002891-RB	1.89622	1.4986	1.47906	1.62463
AAEL002892-RA	0.219238	2.18793	2.37474	1.59397
AAEL002892-RB	0	6.64e-10	0	2.21333e-10
AAEL002892-RC	0	0	0	0
AAEL002892-RD	0	0	0	0
AAEL002892-RE	0.248326	0.0439978	0.293201	0.195175
AAEL002892-RF	0.0524264	0.450583	0.484686	0.329232
AAEL002893-RA	0	0	0	0
AAEL002895-RA	3.92025	2.62871	2.76863	3.10586
AAEL002896-RB	0	0	0.00211384	0.000704613
AAEL002896-RC	0	0	7.77e-05	2.59e-05
AAEL002896-RD	0	0	0.000512546	0.000170849
AAEL002896-RE	0	0	0.0140172	0.0046724
AAEL002898-RA	37.3274	2.00523	4.34311	14.5586
AAEL002900-RA	86.4462	52.8976	45.5609	61.6349
AAEL002903-RA	0	3.28876	1.98548	1.75808
AAEL002903-RB	0	0.47535	0.418038	0.297796
AAEL002903-RC	0.251572	0.486142	0.129395	0.289036
AAEL002904-RA	0	0	0.0313551	0.0104517
AAEL002905-RA	1.51586	2.58658	2.27223	2.12489
AAEL002906-RA	23.1731	13.4234	14.5308	17.0424
AAEL002910-RB	1.16373	3.10763	3.08858	2.45331
AAEL002912-RA	27.0876	15.5289	16.7094	19.7753
AAEL002913-RB	35.0515	40.8793	33.3875	36.4394
AAEL002916-RA	0	0	0	0
AAEL002917-RA	142.871	0.849478	0.351233	48.0239
AAEL002918-RB	0.562876	0.86298	0.7779	0.734585
AAEL002921-RB	0.18161	0.290926	0.133013	0.20185
AAEL002922-RA	3.69821	0.847493	1.13113	1.89228
AAEL002924-RC	28.271	13.1013	14.9244	18.7656
AAEL002924-RD	1.48951	1.92029	1.58651	1.66544
AAEL002924-RE	1.21554	2.22862	2.41491	1.95302
AAEL002924-RF	0	0	0	0
AAEL002925-RA	1.03781	1.0177	1.08691	1.04747
AAEL002925-RB	0.417535	0.819389	0.836337	0.691087
AAEL002925-RC	0.587022	0.186273	0.299289	0.357528
AAEL002929-RA	0.0114728	0	0	0.00382427
AAEL002930-RB	1.32697	0.598283	1.96979	1.29835
AAEL002932-RB	0	0	0	0
AAEL002933-RA	59.9081	32.9374	32.5	41.7818
AAEL002934-RB	3.45481	4.3974	4.43097	4.09439
AAEL002935-RC	2.01712	1.70878	1.43853	1.72148
AAEL002935-RD	0.172859	0	0.074095	0.082318
AAEL002935-RE	0	0.0275093	0.142717	0.0567421
AAEL002935-RF	0.413452	1.86961	2.01349	1.43218
AAEL002938-RA	18.3847	16.4818	17.3435	17.4033
AAEL002938-RB	1.00796	0	0.409425	0.472462
AAEL002940-RA	0	0	0.0437489	0.014583
AAEL002943-RB	0.791457	0.260202	0.3388	0.463486
AAEL002944-RA	2.12359	3.53356	2.93557	2.86424
AAEL002948-RA	15.545	7.50739	7.44195	10.1648
AAEL002949-RA	0	0	0	0
AAEL002950-RB	0.648544	7.62419	10.6003	6.29101
AAEL002950-RC	0.815698	21.2885	29.7583	17.2875
AAEL002951-RA	0.341096	0.0903234	0.0770895	0.169503
AAEL002955-RA	0	0	0	0
AAEL002955-RB	0	0	0	0
AAEL002959-RA	0.390435	0.143635	0	0.178023
AAEL002960-RA	0	0	0	0
AAEL002961-RA	0.274923	0	0	0.091641
AAEL002962-RA	0	0	0	0
AAEL002964-RA	2.72188	0.342708	0.239164	1.10125
AAEL002965-RA	0	0	0	0
AAEL002967-RA	0.491539	0.474561	0.405007	0.457036
AAEL002969-RA	0.903602	0.145436	0.409411	0.48615
AAEL002972-RA	0.200239	0.151948	0.277871	0.210019
AAEL002978-RA	20.2917	26.4861	25.0723	23.95
AAEL002978-RB	35.8621	0.460343	0	12.1075
AAEL002978-RC	2.43727	1.31754	2.33122	2.02868
AAEL002978-RD	0.0012102	12.8156	26.8855	13.2341
AAEL002979-RA	0.95843	1.23363	1.24107	1.14438
AAEL002989-RA	3.53823	5.14123	4.21533	4.29826
AAEL002993-RA	62.4712	24.238	23.4936	36.7343
AAEL002996-RA	1.95429	3.28682	4.04354	3.09488
AAEL002999-RA	0.109493	1.60178	1.66313	1.1248
AAEL002999-RB	1.10123	2.71992	3.02642	2.28252
AAEL002999-RC	2.56404	1.36127	0.844833	1.59005
AAEL003000-RA	0	0	0	0
AAEL003002-RB	0	0	0.0283647	0.0094549
AAEL003004-RB	5.57386	7.8358	6.3567	6.58879
AAEL003008-RB	3.20454	5.54455	5.73651	4.82853
AAEL003012-RA	0	0	0	0
AAEL003016-RA	0	0	0	0
AAEL003016-RB	0	0	0	0
AAEL003016-RC	0	0.597187	0.63418	0.410456
AAEL003018-RA	0.2207	0.462569	0.207164	0.296811
AAEL003018-RB	0.172654	0	0	0.0575513
AAEL003018-RC	0	0.0506195	0.13259	0.0610698
AAEL003019-RB	3.03468	2.74671	0.791142	2.19084
AAEL003019-RC	31.687	5.51109	7.24898	14.8157
AAEL003020-RA	0	0	0	0
AAEL003022-RA	2.32353	3.95242	2.92362	3.06652
AAEL003022-RB	5.7241	2.28965	3.57799	3.86391
AAEL003026-RA	0	0	0	0
AAEL003026-RB	1.09e-10	4.6e-10	0.378032	0.126011
AAEL003026-RC	8.07e-09	2.83e-08	0	1.21233e-08
AAEL003026-RD	4.42e-11	1.94e-10	0	7.94e-11
AAEL003026-RE	3.95e-08	1.3e-07	0	5.65e-08
AAEL003026-RF	0.000893258	0.00191416	0	0.000935806
AAEL003026-RG	0.173793	0.297771	0	0.157188
AAEL003032-RB	3.38637	4.49485	3.99685	3.95936
AAEL003034-RA	5.81811	4.4653	4.84875	5.04405
AAEL003035-RA	0	2.24171	1.38732	1.20968
AAEL003036-RA	0.419331	1.50329	1.14308	1.0219
AAEL003039-RA	81.9177	186.296	199.737	155.984
AAEL003041-RA	0.265484	0.106355	0.0583194	0.143386
AAEL003043-RB	0.00503431	0.129567	0.0800981	0.0715665
AAEL003043-RC	0	0	0.079229	0.0264097
AAEL003045-RA	0	0.0164345	0	0.00547817
AAEL003045-RB	0	0	0	0
AAEL003046-RB	187.767	177.52	168.93	178.072
AAEL003047-RB	0.700803	2.44694	1.63414	1.59396
AAEL003047-RC	1.25e-10	9.06e-11	0.351029	0.11701
AAEL003049-RA	0	0	0	0
AAEL003100-RA	0	0	0	0
AAEL003100-RB	0	0	0	0
AAEL003100-RC	0.0793594	0.140112	0.0149452	0.0781389
AAEL003103-RA	22.1739	36.6755	21.3292	26.7262
AAEL003103-RB	47.8117	41.2645	40.2216	43.0993
AAEL003103-RC	4.91849	9.76376	12.6909	9.12438
AAEL003107-RA	0	0.0576658	0.516239	0.191302
AAEL003109-RA	6.98877	10.3143	12.5496	9.95089
AAEL003109-RB	5.28465	5.50247	5.97434	5.58715
AAEL003109-RC	2.83e-09	1.58529	0.350309	0.6452
AAEL003154-RA	16.2507	1.75742	2.51834	6.84215
AAEL003156-RA	0.782772	0.100827	0	0.294533
AAEL003156-RB	0	0	0	0
AAEL003160-RA	1905.98	571.292	602.419	1026.56
AAEL003161-RA	50.3682	93.276	81.4882	75.0441
AAEL003163-RB	2.79422	0.0736829	0.124206	0.99737
AAEL003165-RA	24.5351	4.80482	3.34454	10.8948
AAEL003170-RB	6.5734	4.14599	3.85437	4.85792
AAEL003173-RA	2.97353	0.618189	0.682151	1.42462
AAEL003173-RB	1.54008	0.0597294	0.115671	0.571827
AAEL003176-RA	0.292133	0.629125	0.489972	0.47041
AAEL003177-RA	0.480089	0.070689	0.180718	0.243832
AAEL003179-RB	22.1326	35.202	34.6074	30.6473
AAEL003180-RA	42.074	23.1969	18.4974	27.9228
AAEL003181-RA	0	0	0	0
AAEL003182-RA	0	0.485399	0	0.1618
AAEL003183-RA	0.146886	0.237875	0.0647847	0.149849
AAEL003184-RC	22.7018	0.719299	0	7.80703
AAEL003184-RD	322.141	0.921714	0.147221	107.737
AAEL003184-RE	10.0698	0.290802	0.0241771	3.46159
AAEL003187-RA	0	0.0236603	0	0.00788677
AAEL003190-RA	16.6757	16.8336	14.1966	15.902
AAEL003193-RA	14.292	13.9087	8.87248	12.3577
AAEL003193-RB	47.085	39.0727	38.4269	41.5282
AAEL003194-RA	0.49287	4.55299	3.03276	2.69287
AAEL003196-RA	0	0	0	0
AAEL003198-RA	7.45e-07	0	0	2.48333e-07
AAEL003201-RA	0	0	0	0
AAEL003203-RC	19.2412	24.8065	28.6974	24.2484
AAEL003203-RD	76.7026	53.6511	60.2338	63.5292
AAEL003203-RE	1.23339	0.480638	0.653407	0.789145
AAEL003203-RF	18.1889	0	0.773063	6.32065
AAEL003206-RA	120.533	21.9664	24.0274	55.5089
AAEL003211-RA	0	0.0484506	0.170591	0.0730139
AAEL003211-RB	0	0.275846	0	0.0919487
AAEL003213-RB	6.91731	2.69097	3.18156	4.26328
AAEL003214-RA	0.630268	0	0.051787	0.227352
AAEL003228-RA	7.10477	5.72318	6.24105	6.35633
AAEL003228-RB	3.93649	4.62e-10	0	1.31216
AAEL003228-RC	0	1.18236	0.428811	0.537057
AAEL003229-RA	1.17e-05	2.22e-05	5.34e-05	2.91e-05
AAEL003229-RB	3.7835	4.20753	3.60664	3.86589
AAEL003230-RA	14.4342	12.0262	9.01893	11.8264
AAEL003233-RA	0.0288988	0	0	0.00963293
AAEL003237-RA	44.6808	5.02422	4.76211	18.1557
AAEL003238-RA	2.90247	1.38446	1.54533	1.94409
AAEL003239-RA	0	0	0	0
AAEL003243-RA	3.16103	0.41277	0.156481	1.24343
AAEL003253-RA	0	0	0	0
AAEL003253-RB	0.293747	0	0	0.0979157
AAEL003257-RB	0	0	0	0
AAEL003260-RA	2.8898	2.05602	1.4519	2.13257
AAEL003262-RA	0.0413125	0	0	0.0137708
AAEL003267-RB	13.2821	1.7583	0.70195	5.24745
AAEL003267-RC	36.215	13.1338	15.1897	21.5128
AAEL003271-RB	0.799671	0.291788	0.417165	0.502875
AAEL003275-RA	3.80673	11.1503	10.8802	8.61241
AAEL003277-RA	1.20908	0.96168	0.523053	0.897938
AAEL003277-RB	0	0.145708	0.734837	0.293515
AAEL003277-RC	0	0	0	0
AAEL003277-RD	0	0	0.0668085	0.0222695
AAEL003277-RE	0	0	0	0
AAEL003277-RF	0	0	2.51e-10	8.36667e-11
AAEL003277-RG	0	0	0	0
AAEL003277-RH	0.332863	0	0	0.110954
AAEL003279-RA	12.02	0.274797	0.351359	4.21539
AAEL003281-RB	20.668	6.32512	4.68906	10.5607
AAEL003283-RB	0	0	0	0
AAEL003283-RC	0	0	0	0
AAEL003283-RD	0	0	0	0
AAEL003283-RE	0.328068	0.00740338	0.004138	0.113203
AAEL003283-RF	2.19788	2.28351	2.35005	2.27715
AAEL003283-RG	0	0	0	0
AAEL003283-RH	0	0	0	0
AAEL003329-RA	0	0	0	0
AAEL003340-RA	0	0.0101183	0	0.00337277
AAEL003341-RB	0	0	0	0
AAEL003353-RA	0	0	0	0
AAEL003490-RA	1.94027	1.36519	1.12717	1.47754
AAEL003491-RC	0	0	0	0
AAEL003491-RD	755.516	7.65576	7.75402	256.975
AAEL003491-RE	12.6801	13.6611	8.20529	11.5155
AAEL003491-RF	27.0415	3.61609	2.32185	10.9931
AAEL003495-RB	0.845398	2.86869	1.88919	1.86776
AAEL003495-RC	0	0	0	0
AAEL003495-RD	0	1.87e-06	0.651658	0.21722
AAEL003501-RA	0	0	0	0
AAEL003503-RA	34.3366	32.4818	29.0322	31.9502
AAEL003504-RB	0.172755	0	0.0314591	0.0680714
AAEL003506-RA	0.319735	0	0.0632347	0.127657
AAEL003581-RC	0.559017	1.0332	0.240866	0.611028
AAEL003581-RD	3.77254	12.567	16.7514	11.0303
AAEL003582-RA	4791.67	3408.7	3637.9	3946.09
AAEL003597-RA	71.3877	21.9125	18.6042	37.3015
AAEL003597-RB	8.56418	0.329294	0	2.96449
AAEL003599-RA	13.7633	4.62855	3.74194	7.37793
AAEL003599-RB	28.4328	4.82	3.69813	12.317
AAEL003599-RC	50.6616	3.22584	3.16728	19.0182
AAEL003600-RA	0.639905	2.33784	0.792114	1.25662
AAEL003601-RA	0.188975	0.662174	0.461004	0.437384
AAEL003605-RA	4.04917	3.59425	5.13956	4.26099
AAEL003605-RB	12.6181	12.5846	13.1646	12.7891
AAEL003606-RA	31.7904	29.5679	32.6502	31.3362
AAEL003611-RA	0.863124	0.823364	1.37366	1.02005
AAEL003611-RB	4.63189	0.489325	0	1.70707
AAEL003613-RA	0	0	0	0
AAEL003613-RB	0.0290875	0	0.0330749	0.0207208
AAEL003622-RA	0	0.0976715	0.0376644	0.045112
AAEL003622-RB	0	0	0	0
AAEL003622-RC	0	0	0	0
AAEL003622-RD	0	0.0243338	0.748771	0.257702
AAEL003628-RA	0	0	0.018129	0.006043
AAEL003629-RA	0	0	0	0
AAEL003631-RA	0.0123689	0.0891773	0	0.0338487
AAEL003632-RA	0.328606	0	0	0.109535
AAEL003634-RA	45.2051	39.5764	34.3665	39.716
AAEL003645-RA	445.752	246.719	189.914	294.128
AAEL003742-RA	3.00873	0.204415	0.234131	1.14909
AAEL003743-RA	3.03151	5.08104	4.86171	4.32475
AAEL003743-RB	4.19355	6.0576	7.70288	5.98468
AAEL003743-RC	0	0	0.225419	0.0751397
AAEL003743-RD	9.5893	16.4454	15.5818	13.8722
AAEL003743-RE	13.0042	0.420303	0.815661	4.74672
AAEL003746-RA	69.4626	31.3093	27.2263	42.6661
AAEL003748-RA	1.36597	49.8329	52.7714	34.6568
AAEL003749-RA	6.9654	5.74109	6.40408	6.37019
AAEL003749-RB	7.1898	4.56034	5.13722	5.62912
AAEL003750-RA	406.089	291.185	297.014	331.429
AAEL003752-RA	49.2579	26.0271	25.0301	33.4384
AAEL003754-RA	0.666476	1.30097	1.52771	1.16505
AAEL003754-RB	0	0	0	0
AAEL003754-RC	0	0	0	0
AAEL003754-RD	0.874479	3.96501	2.85066	2.56338
AAEL003754-RE	1.34557	1.54742	1.5848	1.4926
AAEL003754-RF	0.429627	8.75e-07	0.804281	0.411303
AAEL003755-RA	10.3074	2.11144	4.05434	5.49106
AAEL003756-RA	1.3509	2.59444	1.48335	1.80956
AAEL003757-RA	0	0	0	0
AAEL003758-RA	14.8525	22.7328	19.0902	18.8918
AAEL003758-RB	0	0.864569	0.282595	0.382388
AAEL003762-RA	1.02636	0.839597	0	0.621986
AAEL003762-RB	0	0.405414	1.03947	0.481628
AAEL003762-RC	0.0569586	0.0344358	0.0270428	0.0394791
AAEL003762-RD	4.49478	2.26329	1.24113	2.6664
AAEL003763-RA	32.0782	8.34525	6.66654	15.6967
AAEL003764-RA	7.95856	243.549	240.2	163.903
AAEL003766-RA	1.13889	0.157955	0.194528	0.497124
AAEL003768-RB	0.143329	0	0	0.0477763
AAEL003768-RC	0.338315	0	0.430139	0.256151
AAEL003768-RD	0.000234262	0	0.000170435	0.000134899
AAEL003768-RE	2.27182	3.69665	2.71787	2.89545
AAEL003769-RB	30.5575	33.6066	33.7018	32.622
AAEL003770-RA	12.6281	6.57778	8.371	9.19229
AAEL003771-RA	0	0.225414	0.262696	0.162703
AAEL003771-RB	6.39518	9.09049	6.14447	7.21005
AAEL003772-RB	0.184299	0.105418	0.0720028	0.120573
AAEL003773-RA	0.0595386	0.0122642	0.031394	0.0343989
AAEL003774-RA	64.6626	28.2439	29.4513	40.7859
AAEL003776-RA	7.84738	6.22205	8.6952	7.58821
AAEL003777-RB	0.126727	1.72149	0.498281	0.782166
AAEL003777-RC	1.53e-06	3.37e-05	0.582872	0.194302
AAEL003777-RD	1.00594	6.43742	5.78019	4.40785
AAEL003777-RE	0	5.88e-06	0	1.96e-06
AAEL003777-RF	0	3.86e-11	0	1.28667e-11
AAEL003777-RG	0	1.22e-05	3.92e-07	4.19733e-06
AAEL003779-RB	1.37079	4.15135	4.34957	3.29057
AAEL003781-RA	2.06473	0	0	0.688243
AAEL003781-RB	44.4477	3.88298	4.32775	17.5528
AAEL003782-RA	0	0.283508	0.158654	0.147387
AAEL003785-RA	16.8197	22.7777	24.8184	21.4719
AAEL003785-RB	0	0.781302	0.639841	0.473714
AAEL003789-RB	2.18588	11.1827	9.69871	7.6891
AAEL003789-RC	0.647316	9.42088	12.7066	7.5916
AAEL003791-RA	23.8366	10.0318	9.14998	14.3395
AAEL003794-RB	0	0.0457442	0.0213098	0.0223513
AAEL003797-RA	0	0	0	0
AAEL003801-RA	52.6034	22.5663	21.0956	32.0884
AAEL003803-RA	3.4662	0.120699	0.833089	1.47333
AAEL003806-RB	0	0	0	0
AAEL003809-RA	0	0.131326	0.140133	0.0904863
AAEL003810-RA	0	0.0126093	0	0.0042031
AAEL003812-RB	11.3906	1.64905	2.06639	5.03535
AAEL003812-RC	0	0.0102865	0	0.00342883
AAEL003812-RD	14.8483	0.746397	0.929567	5.50809
AAEL003812-RE	0	0.00661615	0	0.00220538
AAEL003812-RF	0.142553	2.43706	1.89543	1.49168
AAEL003812-RG	0	5.99e-11	0.129445	0.0431483
AAEL003813-RB	0.498177	0	0.665148	0.387775
AAEL003813-RC	0	0.421767	0	0.140589
AAEL003813-RD	0	0.0048031	0.2841	0.096301
AAEL003883-RB	7.65148	9.65961	9.60421	8.97177
AAEL003903-RA	1.47395	7.0086	6.43794	4.9735
AAEL003903-RB	0	0.448567	0	0.149522
AAEL003903-RC	20.6601	15.1867	15.8841	17.2436
AAEL003905-RA	0	0	0.000816885	0.000272295
AAEL003905-RB	0	0	6.53e-07	2.17667e-07
AAEL003905-RC	0	0	0	0
AAEL003905-RD	0	0	0	0
AAEL003905-RE	0	0	0.040678	0.0135593
AAEL003906-RA	1.21961	1.00797	1.15891	1.12883
AAEL003907-RB	9.06337	6.12099	7.19824	7.46087
AAEL003908-RA	6.36391	3.87627	3.20998	4.48339
AAEL003909-RA	160.392	9.32572	11.1838	60.3005
AAEL003910-RB	0.770338	0.793204	0.745541	0.769694
AAEL003911-RB	4.90453	7.33018	6.17595	6.13689
AAEL003912-RA	25.2906	9.76558	13.9563	16.3375
AAEL003913-RA	6.10424	3.96113	3.10088	4.38875
AAEL003914-RB	1.63413	0.284666	0.524616	0.814471
AAEL003914-RC	1.16623	0.348739	0.950249	0.821739
AAEL003914-RD	1.12e-07	0	0	3.73333e-08
AAEL003914-RE	8.85e-09	0	0	2.95e-09
AAEL003914-RF	0.712372	0	0.0952106	0.269194
AAEL003914-RG	0.970082	0	0	0.323361
AAEL003914-RH	1.56e-07	0.584992	0	0.194997
AAEL003915-RA	0.0736322	0	0.0388199	0.037484
AAEL003916-RA	12.1388	14.5505	13.3965	13.3619
AAEL003917-RA	2.60595	5.34519	7.45615	5.13576
AAEL003917-RB	0	0.834703	0.243844	0.359516
AAEL003917-RC	11.6405	0	0	3.88017
AAEL003918-RB	0	0.166891	0.000902117	0.055931
AAEL003918-RC	0.20687	0.391959	0.205761	0.268197
AAEL003918-RD	0.304901	0.207448	0.319497	0.277282
AAEL003919-RA	0	0.762689	1.02036	0.59435
AAEL003919-RB	2.39298	0.252056	0	0.881679
AAEL003919-RC	0	0	0	0
AAEL003921-RA	29.0255	13.4925	17.2053	19.9078
AAEL003922-RA	6.68869	3.22142	4.5209	4.81034
AAEL004042-RE	35.5255	49.8345	61.6197	48.9932
AAEL004042-RF	34.0419	20.3374	33.6008	29.3267
AAEL004043-RA	25.4545	16.0674	11.0702	17.5307
AAEL004046-RB	0.0507103	0.609193	0.323152	0.327685
AAEL004048-RA	360.476	1.61	0.0872602	120.724
AAEL004050-RA	3.52273	2.06534	1.81693	2.46833
AAEL004052-RA	9.43847	10.553	8.43579	9.47575
AAEL004053-RA	3.98249	6.57377	5.14755	5.2346
AAEL004054-RA	11.6417	1.65645	0.502329	4.60016
AAEL004055-RA	3.50239	2.13778	1.74408	2.46142
AAEL004056-RB	43.8311	10.2365	10.0029	21.3568
AAEL004057-RB	0	0	0.242364	0.080788
AAEL004057-RC	4.39527	4.72701	3.09576	4.07268
AAEL004059-RB	416.203	87.3455	72.8205	192.123
AAEL004060-RB	1728.19	181.618	146.519	685.442
AAEL004060-RC	103.356	6.00524	6.55003	38.6371
AAEL004063-RB	15.9352	18.7374	16.8862	17.1863
AAEL004064-RB	0.798237	0.838091	0.720056	0.785461
AAEL004065-RA	170.21	64.6952	64.4468	99.784
AAEL004067-RA	170.824	198.317	142.322	170.488
AAEL004068-RA	7.50584	6.11164	5.03547	6.21765
AAEL004069-RA	115.119	50.4658	48.1491	71.2446
AAEL004070-RA	21.4513	6.35263	6.55138	11.4518
AAEL004071-RA	477.963	170.218	127.996	258.726
AAEL004074-RA	3.07528	9.15717	8.64401	6.95882
AAEL004074-RB	3.23496	4.17121	4.5508	3.98566
AAEL004075-RA	8.23069	8.67418	8.28667	8.39718
AAEL004076-RC	1.33453	3.0658	1.6894	2.02991
AAEL004076-RD	17.1707	18.0826	19.7438	18.3324
AAEL004081-RA	62.0304	19.9448	22.6008	34.8587
AAEL004155-RA	0	0	0	0
AAEL004163-RA	3.13814	1.20919	0.773931	1.70709
AAEL004167-RA	29.0191	24.1961	24.098	25.7711
AAEL004169-RA	10.7908	20.5984	14.5516	15.3136
AAEL004179-RA	0.000938895	0.120607	0.72413	0.281892
AAEL004179-RB	0.594214	1.46068	0.63378	0.896225
AAEL004180-RB	11.2882	6.07448	6.65151	8.00473
AAEL004193-RB	1.35519	0.857382	2.9871	1.73322
AAEL004193-RC	2.54343	2.09887	2.90353	2.51528
AAEL004193-RD	1.45045	5.48751	2.95245	3.2968
AAEL004193-RE	1.19231	2.85513	6.30879	3.45208
AAEL004193-RF	0.93783	0.244345	0.151211	0.444462
AAEL004193-RG	0	0	0	0
AAEL004193-RH	10.4469	8.93438	6.15563	8.5123
AAEL004195-RA	40.4849	70.8019	67.8561	59.7143
AAEL004217-RB	0	5.61e-08	1.02e-07	5.27e-08
AAEL004217-RC	0	0	0	0
AAEL004217-RD	0	0	0	0
AAEL004217-RE	0	0	0	0
AAEL004217-RF	0	3.85e-06	4.88e-06	2.91e-06
AAEL004217-RG	0	0	0	0
AAEL004217-RH	0	0.19408	0.0979237	0.0973346
AAEL004217-RI	0	0	0	0
AAEL004217-RJ	0	0	0	0
AAEL004227-RD	28.1303	27.4785	28.5721	28.0603
AAEL004227-RE	5.78937	106.429	99.8504	70.6896
AAEL004227-RF	1.36867	0.452583	0.379818	0.73369
AAEL004228-RA	7.0555	14.5317	14.3487	11.9786
AAEL004229-RA	8.14034	1.42121	0.538644	3.36673
AAEL004231-RA	0	0	0	0
AAEL004231-RB	0	0	0	0
AAEL004231-RC	0	0	0	0
AAEL004233-RB	0	0	0	0
AAEL004233-RC	0.00261623	0	0.00974683	0.00412102
AAEL004233-RD	0.00945467	0	0.0300441	0.0131663
AAEL004234-RA	134.273	34.6481	34.9597	67.9603
AAEL004235-RA	0.408376	2.40716	2.50218	1.77257
AAEL004235-RB	2.73779	3.63718	4.33831	3.57109
AAEL004235-RC	0	0	0	0
AAEL004235-RD	0	0.22542	0.203246	0.142889
AAEL004235-RE	0.0451118	0.341242	0.137756	0.174703
AAEL004235-RF	0	0.40661	0.392184	0.266265
AAEL004235-RG	0.254317	0.0374502	0.20517	0.165646
AAEL004235-RH	0	0	0	0
AAEL004235-RI	0	0	0	0
AAEL004235-RJ	0	0	0	0
AAEL004235-RK	0	0	0.0823313	0.0274438
AAEL004236-RA	0	0.258258	0	0.086086
AAEL004236-RB	0.0167661	0	0	0.0055887
AAEL004236-RC	0.00560076	0.072469	0	0.0260233
AAEL004236-RD	5.54e-05	1.22793	2.44332	1.22377
AAEL004236-RE	0.941318	1.97238	0.925815	1.27984
AAEL004236-RF	1.3274	9.34802	8.46381	6.37974
AAEL004237-RA	3.46257	4.14072	3.66252	3.75527
AAEL004238-RA	0	0.694425	0.417435	0.37062
AAEL004239-RA	0.31578	0.217031	0.0346638	0.189158
AAEL004240-RA	8.43071	0.239964	0.0139626	2.89488
AAEL004242-RA	553.942	15.343	14.0917	194.459
AAEL004242-RB	0.740834	0	0.126689	0.289174
AAEL004243-RA	1.51282	1.71884	1.31134	1.51433
AAEL004244-RA	0.0232459	0.251288	0.245221	0.173252
AAEL004245-RB	0.0594679	0	0.076213	0.045227
AAEL004275-RA	0	0	0	0
AAEL004280-RA	0	0	0.0124068	0.0041356
AAEL004298-RA	0	0	0	0
AAEL004303-RB	0	0	0	0
AAEL004386-RA	0	0	0	0
AAEL004388-RA	0	0	0	0
AAEL004389-RB	0.231285	0.801432	0.748446	0.593721
AAEL004390-RA	0.0742644	0.030586	0.0391676	0.048006
AAEL004392-RB	0.209511	0.970931	0.220961	0.467134
AAEL004396-RB	0	0	0.0288096	0.0096032
AAEL004397-RA	24.1736	15.6873	24.2065	21.3558
AAEL004398-RB	0	0	0.0415209	0.0138403
AAEL004399-RB	0.0379491	0.110087	0.0272981	0.0584447
AAEL004404-RA	407.748	61.0195	58.4884	175.752
AAEL004410-RB	0.000166409	0.25834	0	0.0861688
AAEL004410-RC	1.53598	0.520475	0.467668	0.841374
AAEL004410-RD	0.381973	0.0766887	0.393763	0.284142
AAEL004524-RA	0.536421	0	0.00940802	0.181943
AAEL004524-RB	0	0	0.0829777	0.0276592
AAEL004528-RA	4.12944	3.30254	2.73516	3.38905
AAEL004543-RB	0.127207	0	0	0.0424023
AAEL004544-RB	0.0142352	0.0390785	0.00625732	0.019857
AAEL004546-RA	22.7415	43.6844	56.1311	40.8523
AAEL004547-RA	0	0	0	0
AAEL004547-RB	4.91061	0.703551	0.116053	1.91007
AAEL004551-RA	4.17733	6.4207	6.17806	5.59203
AAEL004552-RA	6.77421	3.15192	3.09369	4.33994
AAEL004553-RA	54.0449	25.3602	18.0234	32.4762
AAEL004554-RA	3.86565	1.19153	1.42535	2.16084
AAEL004554-RC	8.97828	6.81666	4.27854	6.69116
AAEL004555-RA	0.144748	0.271079	0.381595	0.265807
AAEL004557-RB	0	0	0	0
AAEL004558-RA	10.3274	4.85247	4.9075	6.69579
AAEL004559-RB	0	0	0	0
AAEL004559-RC	0.501142	1.24804	1.21977	0.989651
AAEL004559-RD	0	3.76068	1.0938	1.61816
AAEL004559-RE	0	6.04e-05	0.0304051	0.0101552
AAEL004559-RF	0	2.76e-06	0	9.2e-07
AAEL004559-RG	0.0092543	0.245121	0.137048	0.130474
AAEL004559-RH	0	5.83e-06	0	1.94333e-06
AAEL004559-RI	2.84001	1.24862	0.525382	1.538
AAEL004559-RJ	6.81624	5.5072	6.00539	6.10961
AAEL004559-RK	0	0.000128317	0.066916	0.0223481
AAEL004561-RA	0.223423	0.0959227	0.245351	0.188232
AAEL004562-RA	0.0490212	0.144207	0.38782	0.193683
AAEL004563-RA	45.7021	31.6167	30.0977	35.8055
AAEL004564-RA	0	0	0	0
AAEL004566-RA	22.0741	11.2243	13.1156	15.4713
AAEL004567-RA	32.1772	38.6706	33.5729	34.8069
AAEL004568-RA	0.361207	0.477492	0.595094	0.477931
AAEL004569-RA	1.5923	1.45341	1.43339	1.49303
AAEL004570-RA	1.45014	4.52531	2.74507	2.90684
AAEL004571-RA	1.19336	0.76993	0.698236	0.887175
AAEL004572-RB	0.25224	0.0213746	0.0706012	0.114739
AAEL004572-RC	0.619796	0.125782	0.163333	0.30297
AAEL004573-RB	0	0	0	0
AAEL004574-RA	9.93681	9.13366	8.45791	9.17613
AAEL004575-RA	12.8399	0.400925	0.118997	4.45327
AAEL004575-RB	32.465	18.5755	23.4319	24.8241
AAEL004576-RA	1.19352	0.75054	0.584816	0.842959
AAEL004577-RA	1.72307	0.887967	1.61301	1.40802
AAEL004579-RA	0	0.0447894	0.296063	0.113617
AAEL004579-RB	7.08417	3.86191	2.36492	4.437
AAEL004580-RA	0	9.02102	14.7927	7.93791
AAEL004580-RB	0.224073	0	0	0.074691
AAEL004580-RC	49.6087	1.67107	1.95144	17.7437
AAEL004581-RA	96.3075	1.80298	0.722129	32.9442
AAEL004581-RB	16.1674	0.00266948	0.507276	5.55912
AAEL004581-RC	0.00130199	3.18e-07	0.00013181	0.000478039
AAEL004582-RB	0.307678	0.892897	1.59797	0.932848
AAEL004602-RA	0	0	0	0
AAEL004603-RA	87.9239	56.8929	62.0555	68.9574
AAEL004605-RA	0	0	0	0
AAEL004607-RA	31.854	32.7691	43.876	36.1664
AAEL004608-RA	2.4447	1.75008	2.08476	2.09318
AAEL004608-RB	6.51601	2.55483	3.42814	4.16633
AAEL004613-RA	33.4996	49.2861	64.5381	49.1079
AAEL004616-RA	9.03313	145.308	191.665	115.335
AAEL004620-RB	16.9001	12.3349	12.1412	13.7921
AAEL004620-RC	2.79356	1.85139	1.94531	2.19675
AAEL004623-RB	2.53312	4.83023	4.60056	3.98797
AAEL004624-RB	0	0.166936	0	0.0556453
AAEL004625-RA	2.93801	6.01798	7.04814	5.33471
AAEL004630-RA	0.327969	0.215764	0.119182	0.220972
AAEL004630-RB	1.73826	2.08833	2.29628	2.04096
AAEL004631-RA	5.88203	29.3643	20.0904	18.4456
AAEL004633-RA	12.3613	6.46232	6.33075	8.38479
AAEL004633-RB	1.24654	0.279084	0.868893	0.798172
AAEL004634-RA	0.807202	1.22789	1.18609	1.07373
AAEL004634-RB	0.673406	0.510577	0.8007	0.661561
AAEL004643-RA	47.4455	14.5364	13.2188	25.0669
AAEL004645-RB	1.06939	0.434584	0.682944	0.728973
AAEL004646-RA	0.0734747	28.4848	33.5738	20.7107
AAEL004648-RA	0	0.0174372	0	0.0058124
AAEL004685-RA	17.1426	7.23673	7.51684	10.6321
AAEL004686-RA	19.0959	14.7744	11.0701	14.9801
AAEL004688-RB	1.18051	1.96774	3.46538	2.20454
AAEL004688-RC	1.55379	3.83411	5.06988	3.48593
AAEL004688-RD	5.91158	8.73132	7.44712	7.36334
AAEL004688-RE	0.985837	2.55947	2.24577	1.93036
AAEL004688-RF	2.80653	2.24261	1.18311	2.07742
AAEL004688-RG	0	0.14808	0.00149993	0.04986
AAEL004689-RA	0	0.618213	1.00319	0.540468
AAEL004689-RB	0	0.831182	0.642156	0.491113
AAEL004689-RC	0	0	0	0
AAEL004689-RD	0.0932498	0	0	0.0310833
AAEL004689-RE	0.018488	0	0.243401	0.0872963
AAEL004689-RF	2.77641	1.78535	1.64709	2.06962
AAEL004690-RB	2.97557	0.0673017	0.0862596	1.04304
AAEL004690-RC	28.8866	0.160981	0.0261988	9.69126
AAEL004691-RA	151.249	69.8343	60.9776	94.0203
AAEL004691-RB	0	0.324684	0	0.108228
AAEL004692-RB	2.1843	1.33642	1.19999	1.57357
AAEL004692-RC	0	0	0	0
AAEL004694-RA	0.162373	0.102187	0	0.0881867
AAEL004694-RB	1.42364	0.0098993	0.101502	0.51168
AAEL004694-RC	107.333	0.987162	1.23229	36.5175
AAEL004694-RD	20.261	8.64e-11	0.00166875	6.75422
AAEL004694-RE	3.62917	0	0.000659756	1.20994
AAEL004694-RF	8.45652	0.831541	0.32512	3.20439
AAEL004694-RG	14.9733	9.91e-09	0.128012	5.03377
AAEL004694-RH	0.364917	0	0	0.121639
AAEL004696-RA	0	0	0	0
AAEL004697-RA	1.55668	2.69631	0.819974	1.69099
AAEL004697-RB	7.29801	10.8418	9.86859	9.33613
AAEL004697-RC	0.00723642	5.78051	7.50586	4.4312
AAEL004698-RA	0.161458	0.166279	0.25542	0.194386
AAEL004699-RA	153.177	335.136	338.519	275.611
AAEL004700-RA	0	0	0	0
AAEL004700-RB	0	0	0	0
AAEL004700-RC	1.97e-08	5.33e-08	0.223151	0.0743837
AAEL004700-RD	0.0713297	0.102867	0	0.0580656
AAEL004701-RA	0.852209	0.130067	0.0623989	0.348225
AAEL004702-RA	8.75154	7.58327	6.12143	7.48541
AAEL004702-RB	0.0398574	0.437482	0.454923	0.310754
AAEL004703-RA	0.138166	0	0.0202335	0.0527998
AAEL004705-RA	0	0	0	0
AAEL004707-RA	0	0	0	0
AAEL004809-RA	5.54805	2.0667	1.04342	2.88606
AAEL004824-RB	0.140654	0.0326953	0.0973396	0.0902296
AAEL004863-RB	105.854	0.127726	0.294242	35.4253
AAEL004865-RA	50.8648	87.3871	82.4351	73.5623
AAEL004866-RA	11.1466	10.6345	12.5904	11.4572
AAEL004867-RB	13.3034	3.22432	4.1233	6.88367
AAEL004868-RA	2.37259	4.76445	2.75039	3.29581
AAEL004869-RA	1.45832	3.29994	3.44797	2.73541
AAEL004870-RA	0.216284	0.0342561	0.0219385	0.0908262
AAEL004872-RB	0.138004	0.0947547	0.121282	0.118014
AAEL004872-RC	0	0	0	0
AAEL004873-RA	9.50865	8.45117	10.7939	9.58457
AAEL004873-RB	9.15668	1.38581	5.48e-09	3.51416
AAEL004874-RA	0.434491	4.05178	3.51764	2.66797
AAEL004874-RB	0.778905	1.23009	1.18339	1.06413
AAEL004875-RA	0.0067248	0.0084595	0.753212	0.256132
AAEL004875-RB	2.99e-06	1.19866	1.13317	0.777278
AAEL004875-RC	0.535171	0.5589	2.97e-10	0.36469
AAEL004876-RA	0	0	0.00075179	0.000250597
AAEL004876-RB	0	0	0	0
AAEL004876-RC	0	0	0.0187619	0.00625397
AAEL004877-RA	0.714357	0.745367	0.779632	0.746452
AAEL004879-RA	28.3634	13.8403	13.1255	18.4431
AAEL004881-RB	0.0332434	0.0316157	0.0168626	0.0272406
AAEL004883-RB	0	0	0	0
AAEL004883-RC	0	0	0	0
AAEL004883-RD	0	0	0	0
AAEL004884-RA	10.0979	5.87073	6.4971	7.48858
AAEL004885-RB	0	0.207453	0.149342	0.118932
AAEL004889-RA	3.58414	5.40483	5.14909	4.71269
AAEL004891-RB	4.39	3.16803	3.90934	3.82246
AAEL004892-RB	2.5286	3.95895	4.64796	3.71184
AAEL005047-RA	1.21366	0.72447	1.42156	1.1199
AAEL005048-RC	0	0	0	0
AAEL005048-RD	11.2341	15.7391	16.0414	14.3382
AAEL005048-RE	5.29289	5.348	6.18499	5.60863
AAEL005049-RA	0.212442	0	0	0.070814
AAEL005052-RA	37.6637	36.2872	43.8371	39.2627
AAEL005052-RB	47.097	30.3884	28.6536	35.3797
AAEL005053-RB	0.647032	1.29283	1.99889	1.31292
AAEL005054-RA	106.182	43.1639	50.8472	66.731
AAEL005058-RA	3.07645	1.13774	0.98646	1.73355
AAEL005060-RB	0	0	0.0113381	0.00377937
AAEL005061-RA	6.32888	2.3836	3.23481	3.98243
AAEL005064-RA	2.9888	0.48948	0.70704	1.39511
AAEL005068-RA	1.98368	4.46088	3.16226	3.20227
AAEL005068-RB	0.275526	0.685565	0.485271	0.482121
AAEL005069-RA	97.3858	76.5071	64.0834	79.3254
AAEL005070-RA	4.09238	7.39658	5.66756	5.71884
AAEL005071-RA	3.09206	6.47465	4.61912	4.72861
AAEL005071-RB	0	0.281706	1.56458	0.615429
AAEL005071-RC	1.76077	2.74791	3.96188	2.82352
AAEL005071-RD	0	1.48816	0.902645	0.796935
AAEL005072-RA	0.0913115	1.28492	0.742434	0.706222
AAEL005073-RB	0.0382744	0.0671997	0.191767	0.0990804
AAEL005073-RC	0.0382744	0.0671997	0.191767	0.0990804
AAEL005074-RB	0.232878	0.866625	0	0.366501
AAEL005074-RC	0	0.480761	0.296852	0.259204
AAEL005074-RD	0	0	0	0
AAEL005074-RE	0.457435	9.36e-09	0.814491	0.423975
AAEL005074-RF	0	0	0	0
AAEL005074-RG	0.113239	0	0	0.0377463
AAEL005075-RA	22.155	9.00327	8.55543	13.2379
AAEL005076-RB	5.14e-10	0.126409	0	0.0421363
AAEL005076-RC	5.48e-08	0	0.0944878	0.031496
AAEL005076-RD	0.0115671	0	0	0.0038557
AAEL005079-RB	0	0	0	0
AAEL005079-RC	0.22022	0.302473	0.119402	0.214032
AAEL005080-RA	7.52026	6.20947	5.53526	6.42166
AAEL005084-RA	17.1568	16.5659	15.3513	16.358
AAEL005086-RA	1.37674	0.762133	0.511701	0.883525
AAEL005086-RB	0	0.640722	0.423378	0.3547
AAEL005160-RB	0	0	0	0
AAEL005160-RC	0.316445	0	0.335447	0.217297
AAEL005160-RD	0	0.549079	0	0.183026
AAEL005162-RA	79.5131	25.7594	23.3673	42.8799
AAEL005162-RB	17.505	0	1.2136	6.23953
AAEL005163-RA	31.0852	22.6752	17.7739	23.8448
AAEL005165-RD	120.639	59.1675	49.2598	76.3554
AAEL005165-RE	3.73388	3.18542	2.09549	3.00493
AAEL005165-RF	29.8617	18.4063	18.7015	22.3232
AAEL005165-RG	138.187	240.158	244.066	207.47
AAEL005169-RA	5.68023	6.07871	6.40302	6.05399
AAEL005242-RA	0.677366	1.11373	1.00752	0.932872
AAEL005243-RB	0	0.0587542	0.0547336	0.0378293
AAEL005247-RA	0	0	0	0
AAEL005247-RB	0	0	0	0
AAEL005254-RA	8.49084	6.24078	5.61452	6.78205
AAEL005261-RB	11.1051	14.7838	13.2418	13.0436
AAEL005266-RC	118.408	20.3677	20.2873	53.021
AAEL005266-RD	6104.83	3230.54	3540.82	4292.06
AAEL005271-RB	12.2828	4.21196	2.35988	6.28488
AAEL005271-RC	0.714818	4.93175	5.41228	3.68628
AAEL005278-RA	0	0	0	0
AAEL005278-RB	0	0	0	0
AAEL005279-RA	4.42541	2.83346	2.30392	3.1876
AAEL005281-RA	0.983083	1.01885	0.968583	0.990172
AAEL005281-RB	0	0	0.129051	0.043017
AAEL005400-RA	0.356276	1.33788	4.34645	2.01354
AAEL005400-RAA	0.000948727	0	0.264552	0.0885002
AAEL005400-RAB	0.969918	2.05933	0.567952	1.19907
AAEL005400-RAC	7.11939	1.01867	1.75012	3.29606
AAEL005400-RAD	0	0	0.524031	0.174677
AAEL005400-RAE	0.739426	0	1.49e-05	0.24648
AAEL005400-RB	33.4361	13.0249	10.4667	18.9759
AAEL005400-RC	2.60265	2.37339	1.87647	2.28417
AAEL005400-RD	0	3.9575	0.326815	1.42811
AAEL005400-RE	0	0	0	0
AAEL005400-RF	0	0	0	0
AAEL005400-RG	1.11198	0.59499	0.412289	0.70642
AAEL005400-RH	0.631562	0.694806	0.322314	0.549561
AAEL005400-RI	0	0	0	0
AAEL005400-RJ	0.511094	0.0130127	0.344834	0.289647
AAEL005400-RK	0	0.229283	0.1662	0.131828
AAEL005400-RL	0.618575	0.549587	0.165475	0.444546
AAEL005400-RM	0	0.791764	0	0.263921
AAEL005400-RN	0.350141	4.64475	3.12004	2.70498
AAEL005400-RO	0.692913	0.686119	0.322522	0.567185
AAEL005400-RP	0	0	0	0
AAEL005400-RQ	0	2.08854	0.741737	0.943426
AAEL005400-RR	0	0.199908	0.32688	0.175596
AAEL005400-RS	5.93524	2.18e-08	0	1.97841
AAEL005400-RT	0	0.156326	0	0.0521087
AAEL005400-RU	0.18401	0.286347	0.174956	0.215104
AAEL005400-RV	0	0	0.0803554	0.0267851
AAEL005400-RW	0	0	0	0
AAEL005400-RX	3.11252	0.817788	2.11131	2.01387
AAEL005400-RY	0	0	0	0
AAEL005400-RZ	2.28609	1.16599	1.29311	1.58173
AAEL005401-RA	100.674	296.473	281.723	226.29
AAEL005401-RB	483.46	1411.12	1566.74	1153.77
AAEL005402-RB	2.16877	1.82262	1.37718	1.78952
AAEL005403-RA	6.33488	2.27556	2.52713	3.71252
AAEL005405-RA	37.9651	23.1774	24.6608	28.6011
AAEL005406-RA	3.46871	4.66802	4.55241	4.22971
AAEL005407-RD	24.5778	3.67183	3.93458	10.7281
AAEL005407-RE	11.9116	1.92894	1.97554	5.27203
AAEL005408-RA	40.7295	15.756	13.1337	23.2064
AAEL005409-RA	0.00592652	0	0.00781482	0.00458045
AAEL005410-RA	4.63616	16.8878	15.0003	12.1748
AAEL005411-RA	1.64248	8.01744	7.84694	5.83562
AAEL005411-RB	0.341082	4.29057	7.44067	4.02411
AAEL005411-RC	0.135168	0.601884	0.569056	0.435369
AAEL005412-RA	0.682312	0.259772	1.13579	0.692625
AAEL005412-RB	0	1.21484	0	0.404947
AAEL005412-RC	0	0	0	0
AAEL005413-RB	29.5592	10.0297	7.38162	15.6568
AAEL005414-RA	54.2724	24.6102	27.8824	35.5883
AAEL005415-RA	6.1476	10.3527	14.8485	10.4496
AAEL005417-RA	16.8904	4.07298	1.85546	7.60628
AAEL005417-RB	2.25094	0.598401	0	0.94978
AAEL005419-RA	4.57218	11.2982	10.6792	8.84986
AAEL005420-RA	1.86834	1.75111	1.33988	1.65311
AAEL005422-RA	46.6267	8.45237	8.12124	21.0668
AAEL005423-RA	2.86096	2.01965	1.83385	2.23815
AAEL005423-RB	0.00137508	0	0.474747	0.158707
AAEL005425-RB	1.21042	2.65112	2.66602	2.17585
AAEL005426-RA	20.2492	3.15372	1.92095	8.44129
AAEL005428-RA	2273.23	377.496	253.512	968.079
AAEL005429-RA	43.2954	50.0126	65.483	52.9303
AAEL005429-RB	0	11.5423	12.4499	7.9974
AAEL005431-RA	1.25934	0.242194	0.0663872	0.52264
AAEL005432-RA	38.2172	183.267	192.072	137.852
AAEL005432-RB	34.7127	102.291	98.832	78.6119
AAEL005432-RC	11.0359	7.5922	7.5129	8.71367
AAEL005437-RA	0	0.386398	0.0208616	0.135753
AAEL005437-RB	0	0	0.021108	0.007036
AAEL005438-RA	3.66195	2.98278	3.49361	3.37945
AAEL005440-RC	0.613794	0	0.0803327	0.231376
AAEL005440-RD	6.28e-08	0	3.66e-05	1.22209e-05
AAEL005440-RE	0.196206	0	6.95e-05	0.0654252
AAEL005440-RF	0	0.0837277	0.101162	0.0616299
AAEL005444-RB	0.0912931	0	0.0249714	0.0387548
AAEL005444-RC	0.327863	0	0	0.109288
AAEL005444-RD	0.153555	0	0.0489276	0.0674942
AAEL005500-RA	14.9047	21.3722	22.9469	19.7413
AAEL005500-RB	4.28257	0.595952	1.53248	2.137
AAEL005504-RC	8.96005	5.47029	5.09746	6.50927
AAEL005507-RA	0.0226455	0.317474	0	0.113373
AAEL005507-RB	3.16e-09	8.62e-08	0.00706719	0.00235576
AAEL005507-RC	0	0	0	0
AAEL005507-RD	0	1.74e-10	2.42e-05	8.06672e-06
AAEL005507-RE	3.63e-10	1.09e-08	0	3.75433e-09
AAEL005507-RF	1.6e-08	4.09e-07	0	1.41667e-07
AAEL005507-RG	2.42e-07	5.49e-06	0.315604	0.105203
AAEL005507-RH	4.74e-08	1.15e-06	0	3.99133e-07
AAEL005507-RI	0.00049315	0.008124	0	0.00287238
AAEL005508-RA	321.989	66.7489	52.5362	147.091
AAEL005510-RA	1.3233	2.04246	1.87207	1.74594
AAEL005510-RB	0	0.0369766	0	0.0123255
AAEL005515-RF	0	5.34983	0.948117	2.09932
AAEL005515-RG	32.1815	33.7435	31.9141	32.613
AAEL005515-RH	44.3695	42.0211	36.7753	41.0553
AAEL005515-RI	148.383	154.827	149.392	150.867
AAEL005515-RJ	5.24291	6.86e-09	1.5546	2.26584
AAEL005515-RK	0	0	0	0
AAEL005515-RL	61.7964	123.224	106.759	97.2598
AAEL005515-RM	42.7877	80.6166	67.9804	63.7949
AAEL005518-RA	1.4005	0.464004	0.306126	0.723543
AAEL005520-RC	13.4585	10.7019	6.89554	10.352
AAEL005520-RD	0	1.59113	1.15325	0.914793
AAEL005520-RE	49.263	4.75686	7.8453	20.6217
AAEL005521-RA	54.6497	7.81726	6.33055	22.9325
AAEL005522-RB	20.5761	12.3215	10.4319	14.4432
AAEL005524-RA	480.886	304.514	268.544	351.315
AAEL005524-RB	34.3006	41.9003	34.9202	37.0404
AAEL005526-RB	0	0	0.000133895	4.46317e-05
AAEL005526-RC	1.81338	1.94685	2.73799	2.16607
AAEL005526-RD	0	1.50605	0.75462	0.753557
AAEL005526-RE	0	2.75e-09	0	9.16667e-10
AAEL005526-RF	0	6.83e-06	3.03e-07	2.37767e-06
AAEL005527-RA	11.6573	11.054	13.8623	12.1912
AAEL005528-RA	3.97595	7.60698	6.76538	6.1161
AAEL005528-RB	3.77149	6.81113	7.32647	5.9697
AAEL005530-RA	0.0330149	0.113338	0.0435229	0.0632919
AAEL005531-RA	3.19076	1.56089	1.88194	2.2112
AAEL005533-RB	997.798	0.311173	0.0497982	332.72
AAEL005552-RC	30.6231	0	2.34572	10.9896
AAEL005552-RD	23.0788	8.93524	5.02769	12.3472
AAEL005602-RB	0	0.0420492	0.0896803	0.0439098
AAEL005606-RB	0	0.0287031	0	0.0095677
AAEL005606-RC	0	0.54454	0.050747	0.198429
AAEL005615-RB	88.957	22.1935	21.0471	44.0659
AAEL005626-RB	16.653	3.01043	2.84094	7.50146
AAEL005628-RB	86.8387	56.6584	55.801	66.4327
AAEL005629-RA	5379.23	2542.36	2622.77	3514.79
AAEL005630-RA	0	0	0	0
AAEL005631-RB	3.6305	3.56847	3.36664	3.52187
AAEL005633-RA	0.0376521	0	0.011034	0.0162287
AAEL005634-RB	0	2.79e-07	1.18e-06	4.86333e-07
AAEL005634-RC	0	0.0112772	0	0.00375907
AAEL005634-RD	0.256659	0	0	0.085553
AAEL005634-RE	0	0	0	0
AAEL005634-RF	0	0	0	0
AAEL005634-RG	0	0	0	0
AAEL005634-RH	0	0.0507575	0.0763739	0.0423771
AAEL005635-RA	16.751	13.7415	13.9875	14.8267
AAEL005635-RB	1.11207	0	1.50152	0.871197
AAEL005638-RA	103.843	110.241	154.815	122.966
AAEL005639-RA	35.4394	17.5246	29.4743	27.4794
AAEL005714-RB	0	0	0	0
AAEL005714-RC	0	0	0	0
AAEL005714-RD	0	0	0	0
AAEL005714-RE	0	0	0	0
AAEL005714-RF	0	0	0	0
AAEL005717-RA	1.93336	2.06646	1.41782	1.80588
AAEL005719-RA	6.87474	5.44998	5.05898	5.79457
AAEL005722-RB	6484.46	3910.71	3875.06	4756.74
AAEL005726-RB	0	0.422409	0.676078	0.366162
AAEL005726-RC	0	2.05e-07	0	6.83333e-08
AAEL005726-RD	1.39489	4.03338	4.23999	3.22275
AAEL005726-RE	0.739445	3.19707	3.85532	2.59728
AAEL005726-RF	0	0.720699	0	0.240233
AAEL005726-RG	0	1.44e-08	0.00302711	0.00100904
AAEL005726-RH	0	0.401815	0	0.133938
AAEL005768-RA	3.06943	0.164911	1.6846	1.63965
AAEL005770-RA	0.45615	1.85978	2.87467	1.7302
AAEL005772-RA	2.87103	2.29969	2.66923	2.61332
AAEL005773-RB	0.00644696	0.0531005	0.0425043	0.0340173
AAEL005774-RB	0.0678405	0.00708277	0.0531692	0.0426975
AAEL005774-RC	0	3.84e-05	0	1.28e-05
AAEL005774-RD	0	0.0037043	0.371092	0.124932
AAEL005774-RE	0	0.2394	0	0.0798
AAEL005777-RA	0.0787598	0.405799	0.103782	0.196114
AAEL005777-RB	0	8.87e-10	1.27e-09	7.19e-10
AAEL005777-RC	0	0	0	0
AAEL005777-RD	2.88e-10	3.32e-09	4.26e-09	2.62267e-09
AAEL005787-RA	0.410733	0.199075	0.031849	0.213886
AAEL005789-RA	0.683329	0.427655	0.482256	0.53108
AAEL005790-RA	25.2775	23.8255	16.7017	21.9349
AAEL005790-RB	3.10494	0	0	1.03498
AAEL005790-RC	0.00467533	0	0	0.00155844
AAEL005791-RB	0.0503793	0.0749033	0.0110736	0.0454521
AAEL005792-RA	0	0.0855097	0.123147	0.0695522
AAEL005793-RA	0.137436	0	0	0.045812
AAEL005793-RB	0.124255	0.240284	0.493869	0.286136
AAEL005796-RA	1.17754	0.999832	3.81969	1.99902
AAEL005796-RB	32.1067	24.9739	21.3964	26.159
AAEL005798-RA	527.122	140.126	143.937	270.395
AAEL005799-RA	0.0290461	0	2.06e-06	0.00968272
AAEL005799-RB	13.314	13.331	11.8871	12.844
AAEL005802-RA	9.02827	8.34902	8.79631	8.72453
AAEL005803-RB	0	0.624102	0.293349	0.305817
AAEL005803-RC	0	0.659444	0	0.219815
AAEL005808-RA	0.827613	37.2494	41.981	26.686
AAEL005811-RA	11.0678	10.932	13.2736	11.7578
AAEL005813-RB	0.970843	5.80679	4.78321	3.85361
AAEL005816-RA	12.3199	18.2994	21.9524	17.5239
AAEL005817-RA	6521.15	2733.07	3016.06	4090.09
AAEL005819-RA	4.69102	38.5315	37.262	26.8282
AAEL005822-RA	79.4769	32.2088	29.4396	47.0418
AAEL005825-RA	15.9368	7.55009	7.88956	10.4588
AAEL005826-RA	2.12887	17.0058	19.8954	13.01
AAEL005827-RB	0.445351	1.01405	0.877447	0.778949
AAEL005829-RA	0.07629	0.0673446	0.0574698	0.0670348
AAEL005830-RA	80.396	23.3248	22.2298	41.9835
AAEL005831-RB	10.4375	5.23376	4.50546	6.72557
AAEL005832-RA	14.1838	25.2795	34.8091	24.7575
AAEL005832-RB	32.7042	38.968	35.4747	35.7156
AAEL005834-RA	0	0	0	0
AAEL005837-RA	4.31853	3.44072	3.69424	3.81783
AAEL005837-RB	0	0	0.120713	0.0402377
AAEL005838-RB	1.03746	0.81882	0.745904	0.867395
AAEL005839-RA	2.2057	4.11783	4.36213	3.56189
AAEL005839-RB	0	0.125634	0.15344	0.0930247
AAEL005840-RB	0	0	0.0502878	0.0167626
AAEL005840-RC	0	0.0770927	0	0.0256976
AAEL005943-RB	0.666252	2.2012	2.64506	1.8375
AAEL005944-RA	71.4644	21.3176	22.1157	38.2992
AAEL005945-RB	0	0.274151	0.143643	0.139265
AAEL005946-RA	442.137	96.4434	95.5477	211.376
AAEL005947-RA	25.4755	19.3411	18.7366	21.1844
AAEL005947-RB	10.1401	12.3835	10.5775	11.0337
AAEL005950-RAA	3.06e-06	0	0	1.02e-06
AAEL005950-RAB	0	0	1.45e-10	4.83333e-11
AAEL005950-RAC	0.834521	0	0	0.278174
AAEL005950-RD	2.80479	0	0	0.93493
AAEL005950-RE	0	0	0	0
AAEL005950-RF	0.000163136	0	0	5.43787e-05
AAEL005950-RG	0	0	5.18e-08	1.72667e-08
AAEL005950-RH	0.297289	0	0	0.0990963
AAEL005950-RI	0	0	0.0489152	0.0163051
AAEL005950-RJ	5.22e-08	0	0	1.74e-08
AAEL005950-RK	0.926042	0	0	0.308681
AAEL005950-RL	0	0	0	0
AAEL005950-RM	5.18e-09	0	0	1.72667e-09
AAEL005950-RN	0.288153	0.0387059	0	0.108953
AAEL005950-RO	4.42288	8.83624	6.71483	6.65798
AAEL005950-RP	0	0	0	0
AAEL005950-RQ	0	0	0	0
AAEL005950-RR	0.353068	8.85704	9.76072	6.32361
AAEL005950-RS	0	0	0	0
AAEL005950-RT	0	0.253387	0.596901	0.283429
AAEL005950-RU	0	0	0	0
AAEL005950-RV	0	0	3.06e-05	1.02e-05
AAEL005950-RW	0	0	2.97e-06	9.9e-07
AAEL005950-RX	0	0	0	0
AAEL005950-RY	18.7338	0	0	6.2446
AAEL005950-RZ	1.03e-06	0	0	3.43333e-07
AAEL005951-RC	0	0	0	0
AAEL005951-RD	9.53957	2.5047	0.862944	4.3024
AAEL005952-RB	0	0	0	0
AAEL005952-RC	0	0	0	0
AAEL005952-RD	0	0	0	0
AAEL005952-RE	0	0	0	0
AAEL005952-RF	0.0283721	0.0340755	0	0.0208159
AAEL005992-RB	1.66884	9.52526	7.00565	6.06658
AAEL006063-RA	0	0.485475	0	0.161825
AAEL006064-RA	0	0	0	0
AAEL006065-RA	67.3934	24.897	20.6674	37.6526
AAEL006065-RB	0	0	0	0
AAEL006066-RA	11.4652	22.0808	21.3335	18.2932
AAEL006067-RA	8.04296	3.24685	4.73168	5.3405
AAEL006069-RB	15.4212	43.1787	34.7744	31.1248
AAEL006070-RA	318.071	80.9728	63.925	154.323
AAEL006071-RB	0	0	0	0
AAEL006071-RC	0.0448587	0	0.0715656	0.0388081
AAEL006071-RD	0	4.05e-10	1.18e-10	1.74333e-10
AAEL006071-RE	0.043269	1.2031	0.0550222	0.433797
AAEL006071-RF	0.0839517	2.26952	0.0983542	0.817275
AAEL006071-RG	7.07e-09	0.0387728	0.00325539	0.0140094
AAEL006071-RH	0	2.17e-10	6.65e-11	9.45e-11
AAEL006071-RI	1.19356	0.0282165	1.00703	0.742936
AAEL006071-RJ	2.31954	0.0533102	1.80266	1.39184
AAEL006071-RK	0	0	0	0
AAEL006073-RA	0.342556	0.390948	0.392972	0.375492
AAEL006075-RA	1.20187	2.11949	2.89163	2.071
AAEL006077-RA	0	0	0.0118318	0.00394393
AAEL006077-RB	0	0.0331655	0	0.0110552
AAEL006080-RA	3.89036	1.72853	1.62559	2.41483
AAEL006087-RA	9.47844	11.1342	11.342	10.6515
AAEL006113-RA	10.1833	15.4569	15.2519	13.6307
AAEL006113-RB	0	0	2.20848	0.73616
AAEL006113-RC	0	0	0.0875119	0.0291706
AAEL006113-RD	0.980612	0.597728	1.70577	1.0947
AAEL006113-RE	0	0	0	0
AAEL006113-RF	0	1.23294	2.32792	1.18695
AAEL006113-RG	2.85653	2.54674	0	1.80109
AAEL006113-RH	1.16288	1.83525	0.473073	1.15707
AAEL006113-RI	1.91867	3.86408	2.28926	2.69067
AAEL006113-RJ	1.27e-10	0.335912	0.758373	0.364762
AAEL006114-RB	0	0	0	0
AAEL006116-RB	1.31137	3.1685	3.36757	2.61581
AAEL006118-RA	22.4751	7.7262	5.84813	12.0165
AAEL006120-RB	0.611243	0	0	0.203748
AAEL006120-RC	0.602036	0.628159	0.508874	0.57969
AAEL006120-RD	0	0	0	0
AAEL006120-RE	0	0	0	0
AAEL006120-RF	1.45551	0	0.119668	0.525059
AAEL006157-RB	0	0.00819634	0.0104953	0.00623055
AAEL006158-RA	99.4755	124.288	133.924	119.229
AAEL006159-RA	0	0.29122	0	0.0970733
AAEL006160-RB	4.14e-06	0	0	1.38e-06
AAEL006160-RC	0.00473271	0	0	0.00157757
AAEL006160-RD	0	0	0.00697192	0.00232397
AAEL006161-RB	17.3532	0.541801	0.646797	6.1806
AAEL006164-RA	0.635783	2.4115	0.64974	1.23234
AAEL006166-RA	6.48789	3.15893	2.79057	4.1458
AAEL006167-RB	0	0	0.0322768	0.0107589
AAEL006168-RA	0.650298	0.188969	0.263702	0.367656
AAEL006169-RA	193.873	57.7887	64.0118	105.224
AAEL006189-RA	10.9528	10.6376	12.4876	11.3593
AAEL006191-RB	0	0.227173	0	0.0757243
AAEL006191-RC	0.509269	0	5.23e-09	0.169756
AAEL006191-RD	0	0.000348776	0.163122	0.0544903
AAEL006191-RE	0	0	0.240146	0.0800487
AAEL006191-RF	0	0.00461773	0.0741196	0.0262458
AAEL006193-RA	9.96683	6.40347	4.59369	6.988
AAEL006193-RB	1.51999	0.577203	0.382774	0.826656
AAEL006193-RC	0	0	0.265303	0.0884343
AAEL006196-RA	29.785	56.0708	54.9689	46.9416
AAEL006196-RB	0	5.19849	3.33494	2.84448
AAEL006196-RC	0	0.172256	0.27905	0.150435
AAEL006196-RD	0	0.509602	1.22801	0.579204
AAEL006197-RA	0.78087	0.243246	0.263242	0.429119
AAEL006202-RA	0	0	0	0
AAEL006208-RA	0.0323294	0.371658	0.51868	0.307556
AAEL006209-RA	0.512748	0.574529	0.646238	0.577838
AAEL006287-RA	0.0853159	0.056975	0.167739	0.103343
AAEL006293-RA	0	0	0	0
AAEL006293-RB	0	0	0	0
AAEL006293-RC	0	0	0	0
AAEL006293-RD	0	0.0881522	0.356765	0.148306
AAEL006294-RA	8.92839	4.86973	4.50454	6.10089
AAEL006294-RB	2.99061	0.738872	0	1.24316
AAEL006294-RC	0	0.365704	0.220647	0.19545
AAEL006362-RA	14.6586	19.5556	17.2594	17.1579
AAEL006362-RB	0.430332	0.406649	0	0.278994
AAEL006362-RC	0.639641	0.424001	0.197926	0.420523
AAEL006362-RD	10.3502	0.545415	3.65821	4.85128
AAEL006363-RC	0	0	0.120446	0.0401487
AAEL006363-RD	0	0	0.467597	0.155866
AAEL006363-RE	7.03299	7.82307	6.08993	6.982
AAEL006363-RF	3.0358	1.71857	2.15248	2.30228
AAEL006363-RG	11.7049	13.9686	15.7205	13.798
AAEL006363-RH	0	0	0	0
AAEL006364-RA	136.514	42.9407	44.3441	74.5996
AAEL006364-RB	1.48804	3.32622	7.02366	3.94597
AAEL006364-RC	25.1143	9.26608	6.13238	13.5043
AAEL006364-RD	19.6658	5.20546	4.73629	9.86918
AAEL006364-RE	112.004	7.59354	16.5391	45.3789
AAEL006365-RA	0	0.0994824	0.0317865	0.0437563
AAEL006367-RA	4.66897	10.4495	13.7922	9.63689
AAEL006368-RA	0	0	0	0
AAEL006370-RB	2.26101	1.54913	0.590053	1.46673
AAEL006370-RC	0.557173	2.5201	3.13397	2.07041
AAEL006372-RA	8.44235	285.515	279.711	191.223
AAEL006372-RB	0.000206161	2.87851	12.1401	5.00627
AAEL006372-RC	0.0460757	15.2159	33.3	16.1873
AAEL006373-RB	13.0501	8.25239	8.02501	9.77583
AAEL006374-RA	4.83346	3.47715	2.7259	3.67884
AAEL006376-RA	0.399586	2.03628	0.643463	1.02644
AAEL006377-RA	53.6706	0.760069	0.61387	18.3482
AAEL006378-RA	0	0	0.030483	0.010161
AAEL006381-RA	3.14316	24.1007	25.9972	17.747
AAEL006382-RA	0	0	0.0608193	0.0202731
AAEL006382-RB	0	0.430953	0	0.143651
AAEL006383-RA	0.348921	0	0	0.116307
AAEL006384-RA	0	0.714575	1.03517	0.583248
AAEL006589-RA	0.981017	1.38677	3.05394	1.80724
AAEL006589-RB	0	2.29818	0.561236	0.953139
AAEL006589-RC	0	1.59124	0.0982503	0.563163
AAEL006589-RD	3.63808	1.58627	3.53754	2.92063
AAEL006593-RB	2.72e-08	1.42e-07	0	5.64e-08
AAEL006593-RC	0.037046	0.106802	0	0.0479493
AAEL006597-RA	0	0.0230114	0	0.00767047
AAEL006707-RA	5.87973	8.5456	9.6794	8.03491
AAEL006708-RA	0.179119	3.38068	3.39008	2.31663
AAEL006711-RA	1.42672	1.49779	0.791896	1.2388
AAEL006711-RB	0	0	0	0
AAEL006711-RC	0.669227	0	0.396675	0.355301
AAEL006711-RD	0	0	0	0
AAEL006711-RE	0.587744	0	0.680151	0.422632
AAEL006711-RF	0	1.2323	0.92973	0.720677
AAEL006711-RG	0	0	0.265458	0.088486
AAEL006711-RH	2.25654	0.640925	0.150518	1.01599
AAEL006711-RI	0	0.165281	0.211104	0.125462
AAEL006711-RJ	11.7811	8.34332	7.13736	9.08726
AAEL006712-RA	0.724562	0.642337	0.954894	0.773931
AAEL006713-RA	26.1589	10.7904	7.77767	14.909
AAEL006715-RA	0.147117	2.01963	2.24464	1.47046
AAEL006817-RA	0	0.047105	0	0.0157017
AAEL006818-RB	1.39468	0	0	0.464893
AAEL006819-RA	9.74321	4.60333	3.7502	6.03225
AAEL006820-RA	131.661	59.8029	38.6094	76.6911
AAEL006822-RA	0	0	0.16384	0.0546133
AAEL006822-RB	0	0	0	0
AAEL006822-RC	0	1.52537	0.679964	0.735111
AAEL006822-RD	0	1.20831	0.628157	0.612156
AAEL006822-RE	0	0	0.252817	0.0842723
AAEL006822-RF	0	0	0	0
AAEL006822-RG	0	0.431799	0.341453	0.257751
AAEL006822-RH	0	0	0.0136168	0.00453893
AAEL006822-RI	0	0	0.216071	0.0720237
AAEL006822-RJ	0	0	0.0411102	0.0137034
AAEL006822-RK	0.00102693	0.00858346	0.0176653	0.0090919
AAEL006822-RL	0.0264739	0.192825	0.304633	0.174644
AAEL006823-RA	117.188	50.2996	38.7399	68.7425
AAEL006824-RA	10.4846	0.892378	0.075328	3.81744
AAEL006825-RB	0.0775281	0.279354	0.146046	0.167643
AAEL006826-RB	0	1.29e-07	3.64e-07	1.64333e-07
AAEL006826-RC	0.146482	0.0703947	0.0643718	0.0937495
AAEL006826-RD	0	0	0	0
AAEL006827-RA	0	0	0.0807478	0.0269159
AAEL006827-RB	0	0.0833872	0.00817523	0.0305208
AAEL006829-RA	142.509	63.9365	57.0022	87.8159
AAEL006830-RA	0	0.0325245	0.0693915	0.033972
AAEL006832-RB	0.423539	1.70518	1.6004	1.24304
AAEL006859-RA	98.7702	29.6514	23.4772	50.6329
AAEL006860-RA	10838.3	2732.87	3078.44	5549.87
AAEL006936-RC	1.13559	2.07428	1.66846	1.62611
AAEL006936-RD	0	0	0	0
AAEL006936-RE	0	0	0	0
AAEL006936-RF	0	0	0	0
AAEL006936-RG	6.2e-10	2.77e-09	1.28e-08	5.39667e-09
AAEL006936-RH	0.485792	0.357217	0.486578	0.443196
AAEL006937-RA	7.89455	4.81402	4.41257	5.70705
AAEL006938-RA	2.79434	2.83263	3.15407	2.92701
AAEL006944-RB	0	0	0	0
AAEL006944-RC	0	0	0	0
AAEL006947-RA	0	1.12425	0.5252	0.549817
AAEL006948-RB	0	0	0	0
AAEL006948-RC	0.73251	0.849634	1.03762	0.873255
AAEL006948-RD	0	0.94813	0.370919	0.439683
AAEL006948-RE	0.942313	0.421272	0.858861	0.740815
AAEL006948-RF	2.26e-05	0.718257	1.08673	0.60167
AAEL006948-RG	0	0	0	0
AAEL006948-RH	2.26553	3.72942	3.65108	3.21534
AAEL006948-RI	0	0.0966537	0.38161	0.159421
AAEL006948-RJ	0	0.394078	0.226807	0.206962
AAEL006949-RA	0.923469	1.69745	1.993	1.53797
AAEL006949-RB	3.65036	2.95064	5.77625	4.12575
AAEL006949-RC	2.57836	2.21382	0	1.59739
AAEL006950-RA	2.60689	2.85415	2.88806	2.78303
AAEL006951-RA	14.4921	7.28808	7.58471	9.7883
AAEL006951-RB	45.28	10.0182	9.89377	21.7307
AAEL006951-RC	40.4077	10.915	11.3755	20.8994
AAEL006955-RB	0.0130374	0	0.00556505	0.00620082
AAEL006955-RC	0.00651446	0.023472	0.00302984	0.0110054
AAEL006956-RA	1.71739	14.5765	7.24326	7.84572
AAEL006956-RB	15.5536	15.5013	20.1337	17.0629
AAEL006957-RB	0.0420191	0.285482	0.293683	0.207061
AAEL006958-RB	0	0.81735	0.12329	0.313547
AAEL006958-RC	1.2002	2.14576	1.94538	1.76378
AAEL006958-RD	0	0	0.35455	0.118183
AAEL006958-RE	0	0.064963	0.00358975	0.0228509
AAEL007029-RA	4.16512	41.7114	48.0548	31.3104
AAEL007029-RB	0	0	0	0
AAEL007029-RC	0	0	0	0
AAEL007029-RD	0	0	0	0
AAEL007029-RE	0	0	0	0
AAEL007029-RF	0	0	0	0
AAEL007029-RG	0	0.726088	0.794271	0.506786
AAEL007029-RH	0	0	0	0
AAEL007029-RI	0	0.272969	0.159106	0.144025
AAEL007029-RJ	0	0.929847	0.835155	0.588334
AAEL007029-RK	0	0	2.2e-09	7.33333e-10
AAEL007029-RL	0	1.36155	0	0.45385
AAEL007029-RM	1.83829	2.42155	1.16795	1.80926
AAEL007029-RN	0.0951751	0.222423	1.28029	0.532629
AAEL007029-RO	0	0	0	0
AAEL007030-RA	4.27031	8.0619	8.71371	7.01531
AAEL007030-RB	6.59855	25.8516	27.5383	19.9962
AAEL007030-RC	0.374677	0.252381	0.407697	0.344918
AAEL007030-RD	0.238257	0.122177	0.288898	0.216444
AAEL007034-RA	3.72919	2.22288	2.84678	2.93295
AAEL007038-RB	2.03696	3.92441	3.79774	3.25304
AAEL007039-RB	0.268612	2.4088	5.42716	2.70152
AAEL007040-RA	0.0930858	0	0.014763	0.0359496
AAEL007040-RB	0	0	0	0
AAEL007040-RC	0	0	0	0
AAEL007078-RA	83.7704	99.4785	118.127	100.459
AAEL007198-RA	0.292685	0.208686	0.0741993	0.191857
AAEL007202-RA	3.52167	6.65206	5.42675	5.20016
AAEL007203-RA	9.21033	7.95038	6.0419	7.7342
AAEL007205-RB	0.0355403	0.0274396	0.0351507	0.0327102
AAEL007205-RC	0	0	0	0
AAEL007209-RA	11.487	13.1547	12.4705	12.3707
AAEL007211-RA	1.46223	2.07057	1.7423	1.75837
AAEL007217-RA	0.141018	0.311398	0.398175	0.28353
AAEL007248-RB	3.63736	3.04516	2.22957	2.9707
AAEL007268-RB	0	0	0.0533578	0.0177859
AAEL007268-RC	1.58e-10	0.129257	0.0363763	0.0552111
AAEL007268-RD	0.529106	0.000545412	0.000243918	0.176632
AAEL007343-RA	3.41715	12.0872	10.8865	8.79695
AAEL007383-RE	299.671	153.228	205.373	219.424
AAEL007383-RF	169.13	110.45	107.233	128.938
AAEL007383-RG	1260.2	362.191	316.179	646.19
AAEL007385-RC	25.0786	0	3.16264	9.41375
AAEL007385-RD	13.9697	12.7878	9.53715	12.0982
AAEL007385-RE	283.31	105.545	83.2253	157.36
AAEL007385-RF	740.155	496.035	496.992	577.727
AAEL007386-RA	0.103176	0.0106254	0.0272039	0.0470018
AAEL007387-RB	2.45969	1.54211	1.65e-08	1.33393
AAEL007387-RC	4.06453	5.11563	6.70613	5.29543
AAEL007388-RB	0	0	0.0567405	0.0189135
AAEL007388-RC	0	0	0	0
AAEL007388-RD	0.0453138	0.0777616	0.0167741	0.0466165
AAEL007389-RA	0	0	0	0
AAEL007455-RB	0	0.0800378	0	0.0266793
AAEL007456-RB	1.91914	1.08912	1.6076	1.53862
AAEL007458-RB	0	0	0	0
AAEL007461-RB	1.14808	1.36776	1.5366	1.35081
AAEL007464-RA	1.4163	1.02615	0.964095	1.13552
AAEL007465-RB	0	2.65e-06	5.62e-06	2.75667e-06
AAEL007465-RC	0	0	0	0
AAEL007465-RD	2.97438	0.685425	0.506574	1.38879
AAEL007468-RA	1.22718	2.09139	2.55424	1.9576
AAEL007469-RA	14.7534	7.08409	6.37475	9.40408
AAEL007476-RB	3.32663	12.1814	12.2705	9.25951
AAEL007480-RA	2.08066	2.80996	3.55857	2.8164
AAEL007481-RA	10.9969	6.72727	8.44642	8.72353
AAEL007482-RA	4.10265	3.30335	3.36947	3.59182
AAEL007483-RB	0.145307	0.073838	0.0743629	0.097836
AAEL007484-RA	10.1203	27.6671	23.2251	20.3375
AAEL007484-RB	31.4867	10.0317	20.4679	20.6621
AAEL007487-RA	0.262674	0.850014	0.791633	0.634774
AAEL007487-RB	0	0	0	0
AAEL007487-RC	0	0	0	0
AAEL007492-RA	9.37056	5.83297	5.3468	6.85011
AAEL007493-RA	0.081985	0.535333	0.431961	0.34976
AAEL007494-RA	882.702	308.79	257.48	482.991
AAEL007495-RA	0	1.07122	0.681826	0.584349
AAEL007495-RB	0.595323	0.88194	1.46096	0.979408
AAEL007500-RA	0.243096	0.391295	0.380477	0.338289
AAEL007501-RA	11.3803	7.77319	6.85002	8.66784
AAEL007501-RB	13.0636	22.7201	27.234	21.0059
AAEL007507-RA	0	0	0	0
AAEL007507-RB	0	0	0	0
AAEL007508-RA	0.13193	0.120804	0.0966045	0.116446
AAEL007509-RA	7.71515	4.19792	1.69632	4.53646
AAEL007509-RB	9.01782	4.51394	7.4044	6.97872
AAEL007511-RB	0.116312	0	0	0.0387707
AAEL007512-RA	5.59586	2.38397	1.92	3.29994
AAEL007514-RA	0	0	0	0
AAEL007514-RB	0.102927	0	0.0387603	0.0472291
AAEL007518-RB	0.00544223	0.00599472	0	0.00381232
AAEL007518-RC	0	0.0533324	0	0.0177775
AAEL007518-RD	0	0	0	0
AAEL007518-RE	0.0951647	0.0929541	0.225679	0.137933
AAEL007518-RF	0	0.0972607	0	0.0324202
AAEL007518-RG	0	0	0	0
AAEL007518-RH	1.46e-07	0	0	4.86667e-08
AAEL007518-RI	0	0	0	0
AAEL007518-RJ	0.00123787	0.262167	0.667647	0.310351
AAEL007518-RK	0.0836873	0.828955	0.666106	0.526249
AAEL007518-RL	0	0.55946	0.000708355	0.186723
AAEL007518-RM	2.40849	0.466258	0.800552	1.2251
AAEL007518-RN	0	0	0	0
AAEL007519-RA	0.465678	0.0274094	0	0.164362
AAEL007579-RA	0.266629	0	0	0.0888763
AAEL007579-RB	0	0	0	0
AAEL007579-RC	0.000664578	0	0	0.000221526
AAEL007584-RA	0.253288	0	0	0.0844293
AAEL007586-RA	8.28224	19.0216	22.0425	16.4488
AAEL007587-RB	0.996502	0.162526	0.414032	0.524353
AAEL007591-RA	0.218068	12.201	7.57839	6.66582
AAEL007592-RA	0.441157	43.9482	31.3006	25.23
AAEL007593-RA	133.327	0.17778	0.195026	44.5666
AAEL007595-RB	10.7103	15.582	23.9002	16.7308
AAEL007595-RC	0.25598	1.06006	0.562896	0.626312
AAEL007595-RD	12.624	9.86862	7.99975	10.1641
AAEL007597-RA	2.59097	0.26789	0.6262	1.16169
AAEL007597-RB	1.19264	0.413286	0.265784	0.623903
AAEL007598-RA	0	0	0.00917682	0.00305894
AAEL007607-RA	0	0	0.0136387	0.00454623
AAEL007615-RA	0	0	0.0271729	0.00905763
AAEL007619-RB	0.492897	0.0537519	0.325068	0.290572
AAEL007619-RC	2.05643	1.05905	0.962442	1.35931
AAEL007641-RB	0.0360155	0	0.00949753	0.015171
AAEL007642-RA	4.94834	2.43946	2.04412	3.14397
AAEL007642-RB	0.63901	0	0.0187379	0.219249
AAEL007644-RA	0.30094	4.44205	5.60729	3.45009
AAEL007646-RB	0.026115	0	0	0.008705
AAEL007646-RC	0.0556279	0	0.0195087	0.0250455
AAEL007646-RD	0	0.0221325	0	0.0073775
AAEL007646-RE	0	0	0	0
AAEL007646-RF	0	0	0	0
AAEL007647-RA	23.2543	15.0964	16.0676	18.1394
AAEL007648-RA	0	0	0.0119098	0.00396993
AAEL007650-RA	63.0699	52.7395	55.3594	57.0563
AAEL007651-RA	0.801957	4.33471	7.42243	4.18637
AAEL007651-RB	0.768549	5.95481	4.50208	3.74181
AAEL007651-RC	0.245576	1.09658	0.912564	0.751573
AAEL007651-RD	0.34074	1.03323	1.94964	1.10787
AAEL007652-RA	0.585368	1.12461	1.12596	0.945313
AAEL007653-RA	1.97687	5.22477	6.44094	4.54753
AAEL007654-RA	1.24904	1.31	1.69187	1.41697
AAEL007655-RA	16.4317	7.44899	4.84398	9.57489
AAEL007656-RA	15.6483	14.9784	14.7328	15.1198
AAEL007657-RA	0.00959643	0	0	0.00319881
AAEL007658-RB	0.526113	1.67106	0.643915	0.947029
AAEL007658-RC	0	0	2.24e-05	7.46667e-06
AAEL007658-RD	0	0	0.237855	0.079285
AAEL007658-RE	1.55747	1.07011	0.961699	1.19643
AAEL007658-RF	8.11e-06	4.12e-05	3.91e-05	2.947e-05
AAEL007658-RG	2.26263	1.86726	2.22726	2.11905
AAEL007658-RH	0	0	0	0
AAEL007658-RI	5.44115	2.89803	6.42021	4.9198
AAEL007658-RJ	0.670078	2.10659	0.795945	1.19087
AAEL007658-RK	0	0	0	0
AAEL007658-RL	4.55e-06	0.652336	1.43e-05	0.217452
AAEL007658-RM	0	0.0175954	0.0105043	0.00936657
AAEL007658-RN	0.126103	0	0	0.0420343
AAEL007658-RO	0.509345	4.81e-08	0	0.169782
AAEL007658-RP	0	0.0434492	0.104971	0.0494734
AAEL007658-RQ	0	0.187548	0.454123	0.21389
AAEL007658-RR	0	0	0	0
AAEL007658-RS	0.442548	3.47e-06	4.27e-06	0.147519
AAEL007658-RT	0.288353	0.852925	0.648832	0.596703
AAEL007658-RU	1.12923	0.0852376	0.0445106	0.419659
AAEL007659-RA	1.87822	1.3304	1.44115	1.54992
AAEL007660-RA	25.6623	17.5388	25.8987	23.0333
AAEL007661-RA	0	0	0.398829	0.132943
AAEL007661-RB	0	0.144021	0	0.048007
AAEL007662-RD	4.35486	3.11707	3.29912	3.59035
AAEL007662-RE	0	0	0	0
AAEL007662-RF	8.32664	8.62941	1.24985	6.06863
AAEL007662-RG	0.0993547	0.744369	2.92928	1.25767
AAEL007662-RH	3.56e-08	5.53239	5.2483	3.59356
AAEL007662-RI	0	3.62468	3.42946	2.35138
AAEL007662-RJ	10.0969	7.64956	8.67236	8.80627
AAEL007662-RK	0	1.01054	0.219529	0.410023
AAEL007662-RL	1.55397	2.30345	4.5273	2.79491
AAEL007662-RM	0.801969	3.8528	3.06945	2.57474
AAEL007664-RB	0.0907852	0.0117773	0.0051931	0.0359185
AAEL007667-RA	0.310706	0.0837866	0.107295	0.167263
AAEL007668-RA	77.1482	26.0494	27.6862	43.6279
AAEL007741-RA	0.336104	0.369502	0.531389	0.412332
AAEL007744-RA	3.13021	2.9513	1.59592	2.55914
AAEL007750-RA	11.5743	5.34847	4.69912	7.2073
AAEL007752-RA	1416.07	418.009	440.847	758.309
AAEL007754-RB	2.68504	13.4149	10.21	8.76998
AAEL007757-RA	0.905161	0.254283	0.289235	0.482893
AAEL007758-RA	73.4281	68.1524	33.8305	58.4703
AAEL007760-RA	20.1497	15.9721	16.2211	17.4476
AAEL007762-RA	70.141	13.7281	13.1873	32.3521
AAEL007788-RB	6.37523	4.72564	3.62268	4.90785
AAEL007789-RA	0.206603	0.212774	0.301032	0.240136
AAEL007790-RA	19.4037	9.20749	10.9438	13.185
AAEL007792-RB	21.8556	48.2117	54.1384	41.4019
AAEL007793-RA	0.141988	0.0774025	0.121133	0.113508
AAEL007820-RC	18.6203	18.1669	17.0825	17.9566
AAEL007822-RB	52.4715	12.3085	15.7148	26.8316
AAEL007824-RA	7742.38	2700.34	2709.77	4384.16
AAEL007825-RB	6.57266	4.57259	5.43663	5.52729
AAEL007830-RA	0.799424	0.113494	0.0374136	0.316777
AAEL007830-RB	5.50222	0.42931	0.301991	2.07784
AAEL007831-RA	0	0	0	0
AAEL007832-RB	0.0790589	0.549391	0.293925	0.307458
AAEL007835-RA	0.402624	1.91839	2.13382	1.48494
AAEL007838-RB	0	0	0	0
AAEL007838-RC	0.0793034	0.247232	0	0.108845
AAEL007838-RD	16.0942	4.1393	3.6217	7.95173
AAEL007839-RB	1.15835	3.85816	6.79617	3.93756
AAEL007872-RB	0	0.422795	3.88381	1.43554
AAEL007892-RA	21.8783	84.7953	112.717	73.1302
AAEL007904-RA	6.67142	3.99335	3.99813	4.88763
AAEL007915-RB	0	0	0	0
AAEL007915-RC	7.53736	40.9058	31.2383	26.5605
AAEL007915-RD	0	0	0.114406	0.0381353
AAEL007915-RE	0.496672	2.8127	1.34692	1.5521
AAEL007915-RF	0	0	0	0
AAEL007915-RG	2.4735	0.848017	0	1.10717
AAEL007915-RH	4.52e-05	0	1.28e-10	1.50667e-05
AAEL007915-RI	20.4015	7.56736	9.13161	12.3668
AAEL007915-RJ	30.6568	4.41635	5.22239	13.4318
AAEL007915-RK	1.82e-07	0	0	6.06667e-08
AAEL007915-RL	1.14e-06	0	0	3.8e-07
AAEL007915-RM	0.694256	0	0.563439	0.419232
AAEL007992-RA	0.0689007	0.583762	0.354486	0.335716
AAEL007992-RB	3.18663	3.14963	3.33476	3.22367
AAEL007993-RA	42.4909	8.07376	7.14384	19.2362
AAEL008003-RA	0.0126465	0.0390772	0.0166702	0.022798
AAEL008010-RB	0	0	0	0
AAEL008010-RC	0	0	0	0
AAEL008012-RB	0.5139	0	0	0.1713
AAEL008013-RA	0	0	0	0
AAEL008013-RB	0	0	0	0
AAEL008013-RC	0	0	0.0396692	0.0132231
AAEL008014-RA	0.0533994	0	0.0703966	0.0412653
AAEL008015-RA	13.7484	7.95596	7.37933	9.69456
AAEL008017-RA	0.69315	0.334842	0.823619	0.617204
AAEL008018-RA	0.197749	0	0.0579308	0.0852266
AAEL008020-RA	11.4663	5.09403	5.4318	7.33071
AAEL008021-RA	6.4881	5.34931	5.27157	5.70299
AAEL008021-RB	0	0	0.936561	0.312187
AAEL008021-RC	1.67e-10	0	0	5.56667e-11
AAEL008022-RA	4.29238	0.702766	1.09795	2.03103
AAEL008024-RA	3.93305	5.90475	12.8803	7.5727
AAEL008024-RB	0.930608	3.84446	4.30188	3.02565
AAEL008024-RC	0	0.287709	0.191829	0.159846
AAEL008024-RD	5.92e-08	18.3523	17.0773	11.8099
AAEL008025-RA	100.592	49.7596	55.2111	68.5209
AAEL008027-RB	0	0.606365	0.308714	0.305026
AAEL008027-RC	0.500909	0.300396	1.19e-08	0.267102
AAEL008027-RD	0.720352	1.05867	2.04243	1.27382
AAEL008028-RA	53.3853	28.8612	30.9315	37.726
AAEL008028-RB	0.328234	0.172096	0.112841	0.20439
AAEL008028-RC	2.16e-09	0.504539	0.173159	0.225899
AAEL008029-RA	0	0	0	0
AAEL008029-RB	0	0	0	0
AAEL008029-RC	0	0	0	0
AAEL008029-RD	0	0	0	0
AAEL008031-RB	0.0104442	0.0449947	0.00392299	0.0197873
AAEL008031-RC	0	0	0	0
AAEL008031-RD	0.0403519	0.164193	0.0128213	0.0724554
AAEL008032-RA	0.0764564	0	0.094715	0.0570571
AAEL008032-RB	0.297316	0.101622	0	0.132979
AAEL008071-RB	0.659251	0.975601	0	0.544951
[truncated: 32,478 more rows]

## Sheet: SailfishY1
Name	M1Y1	M1Y2	M1Y3	Y1 Average
AAEL000016-RA	15.3011	23.1494	23.3479	20.5995
AAEL000024-RA	0	0	0	0
AAEL000024-RB	0	0	0	0
AAEL000024-RC	0.411612	0.346843	0.395172	0.384542
AAEL000029-RB	0	0	0.0430852	0.0143617
AAEL000064-RA	2.08437	0.492718	4.47871	2.35193
AAEL000079-RB	0.024955	0.000161912	2.19825	0.741122
AAEL000079-RC	0.0165983	0.00010518	2.30618	0.774294
AAEL000079-RD	0	0.0517104	1.06906	0.37359
AAEL000084-RA	31.3522	31.6274	33.8336	32.2711
AAEL000084-RB	2.26994	2.12276	1.31792	1.90354
AAEL000101-RA	1.00737	0.945843	2.0713	1.3415
AAEL000102-RB	50.7131	30.1854	33.3516	38.0834
AAEL000106-RA	3.44629	2.80848	4.51729	3.59069
AAEL000107-RA	0.80679	0.81381	3.71968	1.78009
AAEL000108-RA	0	0.0705925	0.112913	0.0611685
AAEL000109-RA	2.39911	0.404523	4.07581	2.29315
AAEL000111-RA	2.16226	1.46081	3.28451	2.30253
AAEL000113-RA	0	0	0	0
AAEL000115-RA	23.4836	24.0555	22.4903	23.3431
AAEL000116-RB	0.641629	0.781141	2.35808	1.26028
AAEL000118-RA	5.83301	5.28294	6.42693	5.84763
AAEL000119-RA	0.725157	1.18258	1.18767	1.0318
AAEL000122-RA	0.630515	0.797747	2.39593	1.27473
AAEL000122-RB	0.472853	0.786206	4.24306	1.83404
AAEL000123-RA	0.0545737	0	0.0161972	0.0235903
AAEL000127-RA	2.30494	1.21768	1.995	1.83921
AAEL000127-RB	0.319879	0	0.299316	0.206398
AAEL000134-RA	0.286642	0.10834	0.325791	0.240258
AAEL000137-RB	0.0448046	0.0929029	0.640953	0.259553
AAEL000137-RC	0	0	0.477164	0.159055
AAEL000137-RD	0.630891	0.492552	0	0.374481
AAEL000137-RE	0	0	0.272165	0.0907217
AAEL000137-RF	0	0	0.49601	0.165337
AAEL000138-RA	106.956	127.593	111.872	115.474
AAEL000140-RA	1.05755	1.1674	3.67453	1.96649
AAEL000140-RB	0	0.158931	0	0.052977
AAEL000143-RA	12.2843	9.99932	15.5872	12.6236
AAEL000146-RA	8.07745	6.6424	11.0928	8.60422
AAEL000147-RA	10.851	10.2253	14.755	11.9438
AAEL000148-RA	0.825803	0.47221	2.35285	1.21695
AAEL000149-RA	3.98713	3.69562	9.21726	5.63334
AAEL000154-RA	0.00574193	0.0665637	1.08268	0.384995
AAEL000157-RA	0.565194	0.567212	5.88381	2.33874
AAEL000219-RA	57.9807	49.6962	50.0486	52.5752
AAEL000223-RA	43.3334	69.4208	70.5578	61.104
AAEL000229-RA	0.560854	0	0.65719	0.406015
AAEL000230-RA	8.46755	11.753	12.0232	10.7479
AAEL000231-RA	19.504	22.9603	21.4165	21.2936
AAEL000239-RB	0.142937	0.0593257	0.140835	0.114366
AAEL000241-RA	6.28928	8.17591	7.07604	7.18041
AAEL000242-RA	4.87e-06	1.95e-06	0.0482736	0.0160935
AAEL000242-RB	2.67e-08	7.91e-09	0	1.15367e-08
AAEL000242-RC	5.34e-08	1.65e-08	0	2.33e-08
AAEL000242-RD	0.246872	0.185605	9.13e-09	0.144159
AAEL000242-RE	0	0	0.341689	0.113896
AAEL000242-RF	1.59e-08	4.57e-09	0.182678	0.0608927
AAEL000243-RB	0.0317468	0.06886	0.0583557	0.0529875
AAEL000244-RA	54.3191	41.9671	55.5539	50.6134
AAEL000247-RA	0.313927	0.00318247	0.198516	0.171875
AAEL000247-RB	0	0.0842063	0	0.0280688
AAEL000249-RA	0	0	0.0471976	0.0157325
AAEL000249-RB	0	0	0	0
AAEL000249-RC	0	0	0	0
AAEL000249-RD	0.0850021	0.132764	0	0.0725887
AAEL000249-RE	0	0	0	0
AAEL000250-RB	0	0	0	0
AAEL000250-RC	0	0	0.0501619	0.0167206
AAEL000250-RD	6.27e-05	0	0	2.09e-05
AAEL000250-RE	0.0317538	0	0	0.0105846
AAEL000250-RF	0	0	0	0
AAEL000251-RA	0.0387451	0.0402486	0.046029	0.0416742
AAEL000252-RA	0.280832	0	0.204885	0.161906
AAEL000254-RB	0.00134709	0.000363346	0	0.000570145
AAEL000254-RC	0	0	0	0
AAEL000254-RD	0.356884	0.135141	0.173904	0.221976
AAEL000384-RB	0	0.0267476	0	0.00891587
AAEL000609-RA	0.12571	0.0786009	0	0.0681036
AAEL000626-RA	0.35376	0.411718	0.0914784	0.285652
AAEL000626-RB	40.1824	48.8751	36.8617	41.9731
AAEL000626-RC	0	0.365228	0.0777796	0.147669
AAEL000626-RD	15.54	16.0233	22.2367	17.9333
AAEL000980-RA	0.380133	0.238813	0.92918	0.516042
AAEL000980-RB	0	0.0958871	1.31375	0.469879
AAEL000982-RA	8.79319	9.24442	10.9034	9.647
AAEL000983-RA	3.16165	1.71431	3.14291	2.67296
AAEL000983-RB	0.207189	0	0.046482	0.084557
AAEL000983-RE	0.228444	0.303765	0.0703605	0.200857
AAEL000983-RF	3.06243	8.91294	11.4225	7.79929
AAEL000983-RG	0	0.181698	0	0.060566
AAEL000983-RH	0	0	0.424083	0.141361
AAEL000997-RB	0.0026568	0.0132644	0	0.00530707
AAEL001005-RA	467.123	912.035	374.028	584.395
AAEL001008-RA	3.10706	3.13497	4.56806	3.60336
AAEL001009-RB	0.68889	0.416126	11.5864	4.23047
AAEL001054-RB	0.252913	1.01878	0.811717	0.69447
AAEL001059-RA	0	0.059154	0.137463	0.065539
AAEL001060-RA	0.0597293	0.0309938	0.0355081	0.0420771
AAEL001060-RB	0	0	0	0
AAEL001060-RC	0	0	0	0
AAEL001061-RA	0.281733	0.0332039	0.147364	0.1541
AAEL001061-RB	4.42908	8.57959	87.0134	33.3407
AAEL001061-RC	1.87822	3.21586	46.5693	17.2211
AAEL001062-RB	7.82133	6.39338	5.48358	6.5661
AAEL001063-RA	0	0	0	0
AAEL001065-RA	15.7827	14.6833	16.9156	15.7939
AAEL001067-RA	0.025945	0	0	0.00864833
AAEL001068-RA	0	0	0.097246	0.0324153
AAEL001071-RA	3.46541	1.84318	3.99166	3.10008
AAEL001073-RA	0.0387207	0	0.030636	0.0231189
AAEL001074-RB	0	0.00212405	0.00591242	0.00267882
AAEL001074-RC	0.0350737	0.0122403	0.131004	0.0594393
AAEL001074-RD	0	0.00358669	1.1489	0.384162
AAEL001077-RA	0.17041	0.0759054	0.101179	0.115831
AAEL001080-RA	16.6944	21.7248	11.8203	16.7465
AAEL001082-RA	3.82561	2.31438	1.72116	2.62038
AAEL001084-RA	0.203023	0.0210922	0.144703	0.122939
AAEL001085-RA	23.4776	21.0214	11.4293	18.6428
AAEL001086-RB	0.808999	1.42542	4.30431	2.17958
AAEL001087-RB	5.57555	2.22182	4.9928	4.26339
AAEL001088-RB	0.958984	0.236423	0.188339	0.461249
AAEL001088-RC	0.90042	1.17554	4.56377	2.21324
AAEL001089-RA	19.4711	29.9634	22.0372	23.8239
AAEL001090-RA	0	0	1.11115	0.370383
AAEL001091-RA	25.3456	24.2106	16.9201	22.1588
AAEL001092-RA	58.366	52.0361	57.2896	55.8972
AAEL001094-RA	11.5684	10.9201	7.11839	9.86896
AAEL001094-RB	16.7099	17.5634	10.1069	14.7934
AAEL001094-RC	1.99763	0.377253	0.23338	0.869421
AAEL001094-RD	0	1.91e-10	0.756095	0.252032
AAEL001095-RA	0.28577	0.0165131	0.282607	0.194963
AAEL001098-RA	1.62552	0.469081	0.44446	0.846354
AAEL001099-RA	2.70566	2.93361	8.05155	4.56361
AAEL001099-RB	2.66e-05	1.06e-07	0	8.902e-06
AAEL001099-RC	2.01e-05	7.9e-08	0	6.72633e-06
AAEL001228-RA	0.0140942	0	0.00562873	0.00657431
AAEL001228-RB	0.00541282	0	0.00210033	0.00250438
AAEL001229-RA	0	0	0	0
AAEL001231-RB	0	0	0	0
AAEL001231-RC	0	0	0	0
AAEL001231-RD	0	0	0	0
AAEL001231-RE	0	0	0.0365358	0.0121786
AAEL001231-RF	0	0	0	0
AAEL001231-RG	0	0.0109988	0	0.00366627
AAEL001231-RH	0	0	0	0
AAEL001231-RI	0	0	1.57e-06	5.23333e-07
AAEL001231-RJ	0	0	0	0
AAEL001236-RA	25.988	16.5331	19.643	20.7214
AAEL001290-RA	0	0	0.103968	0.034656
AAEL001319-RB	0.036242	0	0.471383	0.169208
AAEL001351-RA	1.79329	0.833219	4.82445	2.48365
AAEL001427-RA	9.98544	7.51236	10.7421	9.4133
AAEL001433-RB	0.0233513	0	0.263614	0.0956551
AAEL001433-RC	0.176461	0.314604	0.818148	0.436404
AAEL001433-RD	0.063282	0	0.0456649	0.0363156
AAEL001439-RA	33.7613	43.148	38.0052	38.3048
AAEL001442-RB	0.284393	0.217946	0.195788	0.232709
AAEL001442-RC	8.31e-11	0	0.620389	0.206796
AAEL001442-RD	0	0	0.0156838	0.00522793
AAEL001442-RE	9.59e-06	0	3e-10	3.19677e-06
AAEL001442-RF	3.55e-10	8.27e-11	0.323343	0.107781
AAEL001442-RG	0	0.0123301	0.0466538	0.0196613
AAEL001446-RB	1.35408	0.0707125	4.04e-10	0.474931
AAEL001446-RC	0	0	0	0
AAEL001446-RD	0.612814	0.350632	4.51313	1.82553
AAEL001446-RE	0	0	0	0
AAEL001446-RF	0	0	1.00466	0.334887
AAEL001446-RG	0.165959	0	0	0.0553197
AAEL001446-RH	0.278774	0.397141	0.220541	0.298819
AAEL001446-RI	2.8041	1.70669	2.22979	2.24686
AAEL001447-RA	0	0	0	0
AAEL001447-RB	0	0	0	0
AAEL001447-RC	4.08e-10	0	0	1.36e-10
AAEL001447-RD	0	0.272729	0.35195	0.208226
AAEL001447-RE	0	0	0.120349	0.0401163
AAEL001447-RF	0	0	0.184497	0.061499
AAEL001447-RG	0.43144	0	0	0.143813
AAEL001447-RH	0.670302	0.365854	3.88523	1.64046
AAEL001447-RI	6.22e-06	1.72e-06	2.54e-05	1.11133e-05
AAEL001448-RA	3.689	2.98649	0.825256	2.50025
AAEL001448-RB	0.727153	0.212277	0.509417	0.482949
AAEL001448-RC	0	1.02e-05	0	3.4e-06
AAEL001448-RD	3.96215	1.21715	4.34564	3.17498
AAEL001448-RE	0	0.430854	2.79113	1.07399
AAEL001448-RF	1.34e-05	0	0.882353	0.294122
AAEL001448-RG	0	0	0.471478	0.157159
AAEL001448-RH	1.64909	0.00243505	0.77154	0.807688
AAEL001448-RI	0	0.291828	5.17524	1.82236
AAEL001449-RA	0	0.176538	1.63325	0.603263
AAEL001449-RB	0.312796	0	0	0.104265
AAEL001451-RA	3.75386	2.32801	3.38607	3.15598
AAEL001457-RA	0.175452	0	0.0245192	0.0666571
AAEL001459-RA	0.181856	0	0.184561	0.122139
AAEL001459-RB	0	0.0549911	0.339154	0.131382
AAEL001461-RA	0	0	0.0781538	0.0260513
AAEL001464-RB	0	0	0.00580819	0.00193606
AAEL001464-RC	0.726231	0	0.269183	0.331805
AAEL001464-RD	0	0	0.0879676	0.0293225
AAEL001464-RE	0.0588435	0	0.530946	0.196597
AAEL001464-RF	0	0.174304	0.0202578	0.0648539
AAEL001597-RA	1.19243	1.48667	2.87265	1.85058
AAEL001600-RA	0	0	0.168536	0.0561787
AAEL001600-RB	0	0	0.438817	0.146272
AAEL001600-RC	0.463967	0.547734	1.35032	0.78734
AAEL001601-RA	3.15567	2.25816	3.95974	3.12452
AAEL001601-RB	5.66701	3.14748	4.81694	4.54381
AAEL001601-RC	0	0	0.358183	0.119394
AAEL001601-RD	3.15567	2.25816	3.95974	3.12452
AAEL001604-RB	0	0	0	0
AAEL001604-RC	0.249477	0.527369	1.91167	0.896172
AAEL001607-RA	0	0.869305	0	0.289768
AAEL001607-RB	8.06055	2.96717	9.93075	6.98616
AAEL001610-RA	0.899524	0.624108	2.82298	1.44887
AAEL001612-RA	0.271847	0.171969	0.622963	0.355593
AAEL001615-RA	43.9134	50.8421	41.4289	45.3948
AAEL001616-RA	2.32095	1.80623	1.46085	1.86268
AAEL001616-RB	0.356007	0.00324032	2.1286	0.829282
AAEL001616-RC	1.17639	0.146265	1.35917	0.893942
AAEL001619-RA	16.1501	22.241	19.85	19.4137
AAEL001622-RA	9.63808	8.45817	13.7901	10.6288
AAEL001622-RB	1.91086	0.660155	1.09814	1.22305
AAEL001623-RA	149.32	120.825	129.792	133.312
AAEL001624-RA	0.289918	0.634957	4.77147	1.89878
AAEL001625-RA	1.06638	0.152978	0.172767	0.464042
AAEL001626-RA	36.3158	22.309	24.907	27.8439
AAEL001627-RA	3.76626	2.94833	6.03537	4.24999
AAEL001628-RA	0.165475	0.103282	0.314159	0.194305
AAEL001631-RA	0.929373	1.66247	1.75234	1.44806
AAEL002047-RA	2402.6	2529.6	2496.78	2476.33
AAEL002048-RA	14.8754	18.3501	16.3332	16.5196
AAEL002048-RB	3.59231	2.52276	3.82971	3.31493
AAEL002072-RA	0	0.0721727	0.0205748	0.0309158
AAEL002077-RA	40.4865	34.3487	39.8609	38.232
AAEL002078-RA	6.78887	5.26128	9.34123	7.13046
AAEL002084-RB	4.75594	4.19079	13.1029	7.34988
AAEL002135-RA	10.5714	9.16958	14.2099	11.317
AAEL002137-RD	17.3357	11.4489	24.6891	17.8246
AAEL002139-RA	11.1219	10.1517	9.1326	10.1354
AAEL002140-RA	44.5769	40.693	43.807	43.0256
AAEL002141-RA	0.224489	0.0479817	0.0392404	0.103904
AAEL002142-RA	0.619436	0.326853	6.0271	2.32446
AAEL002145-RA	1.75609	1.09972	2.79734	1.88438
AAEL002145-RB	4.19236	4.85191	7.68473	5.57633
AAEL002148-RA	12.4025	14.6095	12.5613	13.1911
AAEL002152-RA	2.67193	2.62945	6.78017	4.02718
AAEL002153-RA	0	0.0357419	0	0.011914
AAEL002155-RA	28.4309	21.8642	30.9216	27.0722
AAEL002157-RA	3.13609	3.59775	6.08887	4.27424
AAEL002157-RB	1.44551	1.38149	1.17552	1.33417
AAEL002158-RA	229.476	191.971	318.373	246.607
AAEL002159-RA	1.77656	0.824069	3.77889	2.12651
AAEL002160-RA	143.152	113.053	125.604	127.27
AAEL002161-RA	39.3247	51.1214	49.1505	46.5322
AAEL002163-RA	30.1033	21.4586	32.9889	28.1836
AAEL002165-RA	19.6094	22.2418	20.7238	20.8583
AAEL002167-RA	0.0287751	0.119682	0.0170784	0.0551785
AAEL002169-RB	2.84252	2.01952	7.21709	4.02638
AAEL002170-RA	31.649	21.7056	30.7448	28.0331
AAEL002170-RB	0	0	0.594667	0.198222
AAEL002173-RB	0	0.0208841	0.03582	0.0189014
AAEL002174-RA	38.8077	53.5318	46.7965	46.3787
AAEL002175-RA	40.3575	20.8389	32.3254	31.1739
AAEL002176-RB	4.11247	1.87622	5.50758	3.83209
AAEL002177-RA	0	0	0	0
AAEL002178-RB	3.03e-07	3.1e-06	0	1.13433e-06
AAEL002178-RC	12.0841	7.89213	1.70984	7.22869
AAEL002178-RD	5.94981	3.1676	17.3161	8.81117
AAEL002211-RA	0	0	0	0
AAEL002287-RB	0.0180509	0.00368247	0.745335	0.255689
AAEL002287-RC	6.35083	4.34321	3.79243	4.82882
AAEL002287-RD	0.963993	0.490254	1.61231	1.02219
AAEL002321-RA	0.0076194	0.181049	0.0114808	0.0667164
AAEL002321-RB	0	4.04e-06	0	1.34667e-06
AAEL002321-RC	0.188934	0	0.312765	0.167233
AAEL002331-RA	7.53164	8.20796	9.32027	8.35329
AAEL002335-RB	0.214082	0.147967	0	0.120683
AAEL002335-RC	0.368179	0.566104	1.06155	0.665278
AAEL002343-RA	0.281731	0.0486811	0	0.110137
AAEL002343-RB	0.22321	0.179438	0.325942	0.242863
AAEL002346-RC	0.619899	1.26715	2.27048	1.38584
AAEL002346-RD	5.37948	3.64253	8.16191	5.72797
AAEL002346-RE	1.16074	0.569533	4.20829	1.97952
AAEL002348-RB	0.100235	0.0781391	0.223163	0.133846
AAEL002354-RB	3.93e-08	1.89e-07	9.95e-08	1.09267e-07
AAEL002354-RC	0.00138177	0.0122517	0.00479791	0.00614379
AAEL002354-RD	0.000158889	0.00124097	0.000516909	0.000638923
AAEL002354-RE	2.89e-06	1.79e-05	8.34e-06	9.71e-06
AAEL002354-RF	0.00476426	0.0454239	0.0171713	0.0224532
AAEL002357-RA	0	0	0	0
AAEL002357-RB	2.99e-05	1.97e-05	4.51e-05	3.15667e-05
AAEL002357-RC	2.15e-08	0	0	7.16667e-09
AAEL002357-RD	0	0	0	0
AAEL002357-RE	0.0128944	0.0120475	0.0234288	0.0161236
AAEL002357-RF	0.0193436	0.0185024	0.0355881	0.024478
AAEL002357-RG	1.69e-07	0.034498	0.0390193	0.0245058
AAEL002357-RH	0	0	0.0680492	0.0226831
AAEL002357-RI	0.352364	0.195172	0.211027	0.252854
AAEL002407-RB	20.4064	16.8914	28.0837	21.7938
AAEL002408-RB	0.140128	0.10509	0.999154	0.414791
AAEL002410-RB	0.0033114	0.00677332	0.00912134	0.00640202
AAEL002410-RC	0.0049719	0.0104119	0.0138675	0.00975043
AAEL002411-RC	126.946	113.656	123.991	121.531
AAEL002411-RD	41.1389	34.1736	48.1894	41.1673
AAEL002412-RA	4.89537	3.19168	4.62752	4.23819
AAEL002413-RA	0.576427	0.0493334	2.44352	1.02309
AAEL002415-RC	0	0.490777	0.189088	0.226622
AAEL002415-RD	0.506578	0	0	0.168859
AAEL002415-RE	0	0.209313	0.121213	0.110175
AAEL002415-RF	1.99718	1.27942	1.98075	1.75245
AAEL002415-RG	0	0	2.26e-05	7.53333e-06
AAEL002415-RH	0	0	9.92e-06	3.30667e-06
AAEL002416-RA	20.7295	27.3275	17.8015	21.9528
AAEL002416-RB	5.4523	5.94256	8.73131	6.70872
AAEL002417-RA	0.349926	0.411056	0.027719	0.2629
AAEL002417-RB	10.0973	19.4062	14.1345	14.546
AAEL002417-RC	0	0.272678	0.292802	0.188493
AAEL002417-RD	2.37596	0.000452859	0.260136	0.87885
AAEL002417-RE	0	1.4615	0.416896	0.626132
AAEL002417-RF	4.08779	8.90631	5.34234	6.11215
AAEL002417-RG	1.02125	0.47774	1.51e-08	0.499663
AAEL002417-RH	0	0	0	0
AAEL002417-RI	0	0	0.112913	0.0376377
AAEL002417-RJ	0	0	0	0
AAEL002417-RK	0.0861967	0.135914	0.0520824	0.0913977
AAEL002417-RL	0	0	0.22363	0.0745433
AAEL002417-RM	0	0	0	0
AAEL002417-RN	0	0.112425	0.0717017	0.0613756
AAEL002417-RO	0.172565	0.471454	0.0986258	0.247548
AAEL002417-RP	0	0	0	0
AAEL002418-RA	28.6338	39.1916	32.4798	33.4351
AAEL002419-RA	2.9337	1.39947	3.72212	2.6851
AAEL002422-RB	0	0	2.05699	0.685663
AAEL002422-RC	0	0	4.02761	1.34254
AAEL002422-RD	0	0	0.589613	0.196538
AAEL002422-RE	0	0	0.394764	0.131588
AAEL002422-RF	0	0	0.834406	0.278135
AAEL002422-RG	0.0113123	0.0469666	7.51909	2.52579
AAEL002422-RH	0	0	0.764329	0.254776
AAEL002422-RI	0	0	3.37412	1.12471
AAEL002422-RJ	0	0	3.2258	1.07527
AAEL002422-RK	0	0	1.28565	0.42855
AAEL002422-RL	0	0	0.514651	0.17155
AAEL002422-RM	0	0	0.930639	0.310213
AAEL002422-RN	0	0	0	0
AAEL002422-RO	0	0	1.91498	0.638327
AAEL002422-RP	0	0	0.799092	0.266364
AAEL002423-RA	1.2795	1.80394	1.54571	1.54305
AAEL002425-RA	0	0	0	0
AAEL002426-RA	20.8648	17.0497	17.2781	18.3975
AAEL002427-RB	1.75778	1.13451	2.5661	1.81946
AAEL002428-RB	9.42e-05	1.64e-05	0.000102005	7.08683e-05
AAEL002428-RC	7.1342	1.71674	8.45539	5.76878
AAEL002428-RD	0.147661	0	0.175715	0.107792
AAEL002428-RE	0.462077	0.132497	0.645973	0.413516
AAEL002430-RA	4.94444	4.88629	5.09413	4.97495
AAEL002432-RA	0.587437	0.704022	0.83754	0.709666
AAEL002433-RA	7.44568	6.17774	5.34166	6.32169
AAEL002435-RA	1.2553	1.41647	2.46331	1.71169
AAEL002435-RB	2.1749	0.905167	2.94091	2.00699
AAEL002435-RC	0.483791	0.346144	0.931934	0.58729
AAEL002435-RD	2.34891	1.34853	2.22653	1.97466
AAEL002435-RE	10.8225	9.8156	20.4324	13.6902
AAEL002435-RF	0	0	0.797236	0.265745
AAEL002436-RD	2.68251	2.71779	2.21437	2.53822
AAEL002436-RE	1.11776	1.28883	2.97863	1.79507
AAEL002436-RF	7.15335	4.43266	8.05437	6.54679
AAEL002438-RB	0.199866	0.139085	0	0.112984
AAEL002450-RA	3.41132	3.89391	4.78404	4.02976
AAEL002451-RB	0.140215	0.033216	1.01171	0.395047
AAEL002453-RB	1.70965	1.62354	2.86264	2.06528
AAEL002454-RA	0.275758	0.574269	1.25748	0.702502
AAEL002455-RB	1.56467	0.786973	1.44427	1.2653
AAEL002455-RC	0.3321	0.613659	5.0392	1.99499
AAEL002455-RD	0	0	0.20349	0.06783
AAEL002499-RA	1.38397	0.361211	1.47203	1.0724
AAEL002501-RA	35.2867	35.0218	40.7633	37.0239
AAEL002501-RB	27.6566	44.5573	32.0682	34.7607
AAEL002502-RA	1.98299	1.17443	2.0099	1.72244
AAEL002503-RA	9.80953	6.49222	12.7318	9.67785
AAEL002504-RB	188.155	257.578	242.285	229.339
AAEL002506-RA	0.845746	0.459253	0.682346	0.662448
AAEL002508-RA	36.691	43.2525	37.3259	39.0898
AAEL002510-RA	1.05972	0.12167	0.371118	0.517503
AAEL002510-RB	52.6624	27.6387	29.5055	36.6022
AAEL002510-RC	0	0.127675	1.94e-08	0.0425583
AAEL002510-RD	14.806	10.6843	19.298	14.9294
AAEL002512-RA	1.14153	2.23849	1.54518	1.64173
AAEL002514-RB	1.54632	1.78616	2.29608	1.87619
AAEL002518-RB	0	0	0	0
AAEL002518-RC	0	0	0.0326933	0.0108978
AAEL002518-RD	0.186223	0.0101122	0.03629	0.0775417
AAEL002518-RE	0	0	0	0
AAEL002518-RF	0.121184	0.0183907	0.120763	0.0867792
AAEL002520-RA	0.708304	0.624832	0.871171	0.734769
AAEL002520-RB	0	0	0	0
AAEL002523-RA	39.1628	58.1199	47.8888	48.3905
AAEL002524-RA	2.05612	0.479284	1.00971	1.1817
AAEL002525-RA	2.64797	1.66867	2.71795	2.34486
AAEL002526-RA	118.265	136.232	145.36	133.286
AAEL002527-RA	125.095	106.208	129.94	120.414
AAEL002527-RB	18.4577	14.16	10.6112	14.4096
AAEL002529-RA	5.57049	6.81618	10.0922	7.49296
AAEL002531-RA	1.29847	1.62789	2.1796	1.70199
AAEL002534-RA	3894.52	4426.83	3185.63	3835.66
AAEL002537-RB	0.0227673	0.0119038	0.108265	0.0476454
AAEL002538-RA	0.296338	0.639084	0.388297	0.44124
AAEL002539-RA	49.4107	41.6953	47.2494	46.1185
AAEL002539-RB	4.93481	2.41521	5.65664	4.33555
AAEL002541-RB	0.207399	0.0462157	0.562674	0.272096
AAEL002542-RA	99.1265	109.76	155.851	121.579
AAEL002543-RB	0.712637	0	0.0220862	0.244908
AAEL002543-RC	0	0	0	0
AAEL002543-RD	2.5663	2.62289	4.08137	3.09019
AAEL002543-RE	0.180959	0	0	0.0603197
AAEL002544-RA	9.69127	11.3302	12.5647	11.1954
AAEL002544-RB	8.06e-05	2.05971	0.0518902	0.703894
AAEL002546-RA	0.443027	0.401213	2.78215	1.2088
AAEL002547-RA	0.122165	0.177759	0.101547	0.133824
AAEL002548-RB	2.74674	2.64613	10.344	5.24562
AAEL002549-RA	1.81609	0.460934	0.492264	0.923096
AAEL002550-RE	0.267846	3.27e-05	0.282033	0.183304
AAEL002550-RF	0.0770634	0	0.366618	0.147894
AAEL002550-RG	0.803539	1.19971	7.40004	3.13443
AAEL002551-RB	25.348	14.9709	30.471	23.5966
AAEL002554-RC	0	0	8.2e-10	2.73333e-10
AAEL002554-RD	1.07906	0.486667	10.3644	3.97671
AAEL002554-RE	1.04698	0.357845	6.3141	2.57298
AAEL002554-RF	0	0	0.63673	0.212243
AAEL002555-RB	1.48554	5.45439	0.391089	2.44367
AAEL002555-RC	2.34305	3.89734	0.601464	2.28062
AAEL002555-RD	0.0549995	0.0563979	0	0.0371325
AAEL002555-RE	1.60166	1.16333	0.786993	1.18399
AAEL002555-RF	112.732	268.506	67.9127	149.717
AAEL002556-RB	1.30397	1.30676	1.55869	1.38981
AAEL002557-RB	0.121242	2.42e-07	7.31732	2.47952
AAEL002557-RC	0.0279177	2.6e-08	0.160855	0.0629242
AAEL002557-RD	0.432579	0.243511	0.57714	0.417743
AAEL002557-RE	0.362045	0.421668	0.356346	0.38002
AAEL002557-RF	0.0929415	0.0805086	0.00589556	0.0597819
AAEL002557-RG	0.0729465	0.0285472	0.00599642	0.03583
AAEL002559-RB	0.462204	0.26721	0.84158	0.523665
AAEL002560-RA	84.2462	149.553	58.1318	97.3103
AAEL002560-RB	0	0	0	0
AAEL002560-RC	0.169231	0.838652	0.30297	0.436951
AAEL002562-RA	7.51603	8.39787	8.26082	8.05824
AAEL002562-RB	11.8327	9.5415	9.61075	10.3283
AAEL002563-RA	6.19841	6.68601	5.21454	6.03299
AAEL002564-RA	0.0500695	0.026088	0	0.0253858
AAEL002565-RA	0	0.0288177	0	0.0096059
AAEL002565-RB	0.0973392	0.12732	0.230408	0.151689
AAEL002565-RC	0	0	0.0199475	0.00664917
AAEL002565-RD	0	0	0	0
AAEL002565-RE	0	0	0	0
AAEL002565-RF	0	0	0	0
AAEL002565-RG	0.022694	0.00155765	0.0412954	0.021849
AAEL002565-RH	4.06033	3.29894	3.0106	3.45662
AAEL002566-RA	0.0494057	0.0128377	0.0733332	0.0451922
AAEL002567-RA	0.0667325	0.139415	0.0346404	0.0802626
AAEL002567-RB	0	0	0	0
AAEL002567-RC	0.0716563	0.612755	0.0636509	0.249354
AAEL002567-RD	0	0	0	0
AAEL002567-RE	0	0	0	0
AAEL002569-RB	0.412081	0.322105	5.53349	2.08923
AAEL002569-RC	0	1.03e-07	0.826731	0.275577
AAEL002569-RD	0	0.0385111	0	0.012837
AAEL002571-RB	0.00917563	0.0640539	0.11337	0.0621998
AAEL002571-RC	0	0	0.0190575	0.0063525
AAEL002571-RD	0	0	0	0
AAEL002571-RE	0	0	0	0
AAEL002571-RF	0	0	0.0776601	0.0258867
AAEL002571-RG	0	0	0	0
AAEL002571-RH	0	0	0	0
AAEL002571-RI	0	0	0	0
AAEL002571-RJ	0.0481428	0	0.0161589	0.0214339
AAEL002572-RA	130.007	123.259	97.9885	117.085
AAEL002574-RA	0.0138039	0.0143516	0	0.00938517
AAEL002575-RB	0	0	0	0
AAEL002575-RC	0	0	0	0
AAEL002733-RB	46.6538	37.2665	29.0138	37.6447
AAEL002733-RC	0.143988	0	0	0.047996
AAEL002733-RD	1.27502	2.01586	1.15184	1.48091
AAEL002733-RE	27.3764	17.4556	20.9069	21.913
AAEL002740-RB	0.00681202	0.0142679	1.09202	0.371033
AAEL002740-RC	0.000402438	0.000713652	0.93809	0.313069
AAEL002741-RB	0.0094333	0.0587932	0.0224144	0.0302136
AAEL002742-RB	2.99875	1.34719	3.76684	2.70426
AAEL002745-RB	0.0265507	0.0118062	0	0.0127856
AAEL002754-RB	0	0	0	0
AAEL002764-RC	50.6195	42.2215	51.926	48.2557
AAEL002764-RD	2.35525	1.6118	4.66635	2.8778
AAEL002764-RE	61.947	50.2204	44.7498	52.3057
AAEL002766-RA	5.68204	6.676	6.06924	6.14243
AAEL002769-RB	0.152501	0.094909	0.0677017	0.105037
AAEL002769-RC	0	0	2.68048	0.893493
AAEL002769-RD	0	0	1.29114	0.43038
AAEL002769-RE	5.4e-11	0	0.585631	0.19521
AAEL002773-RA	0.141887	0.123179	0.0840768	0.116381
AAEL002775-RA	0.864149	1.5055	0.0967552	0.822135
AAEL002775-RB	0.660013	0.29326	0.897614	0.616962
AAEL002783-RA	34.4124	32.1571	26.2147	30.9281
AAEL002784-RA	21.4112	27.9007	20.0366	23.1162
AAEL002785-RA	0.255226	0.414796	2.17693	0.948984
AAEL002786-RA	0.0490979	0	0	0.016366
AAEL002786-RB	0	0.0212044	0.0121454	0.0111166
AAEL002786-RC	0	2.65e-06	1.93e-06	1.52667e-06
AAEL002790-RA	1.97005	1.79249	2.46936	2.0773
AAEL002791-RA	8.05565	4.26951	9.12521	7.15012
AAEL002792-RA	0	0	0	0
AAEL002796-RA	2.50728	2.24407	2.1497	2.30035
AAEL002796-RB	0.49922	4.89e-08	0.0630335	0.187418
AAEL002800-RA	0.0970625	0.0596763	0.987582	0.38144
AAEL002801-RA	1.7789	1.68715	5.15689	2.87431
AAEL002803-RB	0	0	0	0
AAEL002803-RC	0.273219	0.0668688	0.038144	0.126077
AAEL002804-RA	31.8827	30.2558	40.4494	34.196
AAEL002805-RA	13.564	10.8003	10.4549	11.6064
AAEL002808-RA	21.6183	25.4728	18.2917	21.7943
AAEL002809-RB	5.77714	4.76933	7.91626	6.15424
AAEL002809-RC	0	0.677834	0	0.225945
AAEL002810-RA	0.493476	0.164046	3.35322	1.33691
AAEL002811-RA	255.377	210.219	376.652	280.749
AAEL002812-RA	23.0086	20.7765	20.2729	21.3527
AAEL002813-RA	355.633	400.848	458.495	404.992
AAEL002814-RA	0.591233	0.570819	0.685136	0.615729
AAEL002816-RA	1.29423	0.314744	4.48724	2.03207
AAEL002817-RB	12.5722	13.1107	6.07785	10.5869
AAEL002856-RA	9.66134	6.69589	13.7577	10.0383
AAEL002859-RB	20.6208	10.6868	20.7684	17.3587
AAEL002860-RA	32.2726	16.0797	29.3616	25.9046
AAEL002861-RA	24.9728	28.227	54.885	36.0283
AAEL002863-RA	3.17498	2.78833	4.5154	3.4929
AAEL002864-RA	1.02086	1.71522	3.53439	2.09016
AAEL002866-RA	28.4248	20.0696	29.0501	25.8482
AAEL002867-RA	53.6873	53.933	43.391	50.3371
AAEL002869-RA	2.00621	1.89709	2.46153	2.12161
AAEL002870-RC	38.9292	53.3225	44.5753	45.609
AAEL002874-RB	3.8036	4.08062	8.05536	5.31319
AAEL002874-RC	0	0	0.415929	0.138643
AAEL002876-RB	0	0	0	0
AAEL002876-RC	0	0	0	0
AAEL002876-RD	0	0	0	0
AAEL002876-RE	0	0	0	0
AAEL002876-RF	0	0	0	0
AAEL002876-RG	0	0	0	0
AAEL002876-RH	0.00877373	0	0	0.00292458
AAEL002876-RI	0	0	0	0
AAEL002876-RJ	0	0	0	0
AAEL002876-RK	0	0	0	0
AAEL002876-RL	0	0	0	0
AAEL002876-RM	0	0	0	0
AAEL002876-RN	0	3.21e-08	3.98e-07	1.43367e-07
AAEL002876-RO	0	0.00347371	0.0318567	0.0117768
AAEL002876-RP	0	0	0	0
AAEL002877-RA	0	0	0	0
AAEL002877-RB	0	0	0	0
AAEL002877-RC	0.0285061	0	0.0677323	0.0320795
AAEL002878-RA	0	0	0	0
AAEL002879-RAA	0.0992174	0.00028109	0.0385528	0.0460171
AAEL002879-RAB	0.0837717	0.000330261	0.679734	0.254612
AAEL002879-RAC	0	0	0	0
AAEL002879-RAD	0	0	0	0
AAEL002879-RB	5.03501	3.01582	5.0321	4.36098
AAEL002879-RC	8.96e-05	9.24e-06	1.18e-06	3.334e-05
AAEL002879-RD	1.94703	1.11416	1.53233	1.53117
AAEL002879-RE	3.39659	3.02279	1.27053	2.5633
AAEL002879-RF	0.000462802	4.05e-05	2.36e-05	0.000175634
AAEL002879-RG	2.48e-06	1.13e-09	7.96e-07	1.09238e-06
AAEL002879-RH	10.7729	3.86986	6.18209	6.94162
AAEL002879-RI	2.72e-05	1.38e-08	1.51e-06	9.5746e-06
AAEL002879-RJ	0	0.0495838	0	0.0165279
AAEL002879-RK	0	0	0	0
AAEL002879-RL	0	0	0	0
AAEL002879-RM	0	0	0	0
AAEL002879-RN	6.63001	3.53201	1.64911	3.93704
AAEL002879-RO	0	0	0	0
AAEL002879-RP	0.000985665	5.48e-05	3.5e-05	0.000358488
AAEL002879-RQ	0	0	0	0
AAEL002879-RR	0	0	0	0
AAEL002879-RS	0	0	0	0
AAEL002879-RT	0.219796	0.276507	0.200697	0.232333
AAEL002879-RU	0.163808	0	0.114229	0.092679
AAEL002879-RV	1.95457	0.851115	3.04803	1.95124
AAEL002879-RW	0	0	0	0
AAEL002879-RX	0.00708837	0.0706115	0.000696206	0.026132
AAEL002879-RY	0.000476198	3.62e-05	5.01e-05	0.000187499
AAEL002879-RZ	0.0162851	0.106684	0.00114665	0.0413719
AAEL002880-RA	0.725047	0.202957	0.118886	0.348963
AAEL002881-RA	604.826	713.107	618.458	645.464
AAEL002882-RA	0	0	0	0
AAEL002886-RA	8.45884	12.7881	11.2264	10.8244
AAEL002886-RB	118.012	124.442	89.1133	110.522
AAEL002886-RC	2.64971	1.6751	1.6356	1.9868
AAEL002886-RD	50.9633	65.7327	40.3414	52.3458
AAEL002887-RA	19.0645	14.0136	24.6945	19.2575
AAEL002887-RB	0.643801	0.138193	0.293397	0.358464
AAEL002887-RC	2.27158	0.0627473	1.99e-05	0.778116
AAEL002887-RD	0	0	0	0
AAEL002887-RE	0	0	0	0
AAEL002887-RF	0	0	0	0
AAEL002887-RG	0.127575	0.0538897	0.068445	0.0833032
AAEL002887-RH	1.90832	1.35036	1.4933	1.58399
AAEL002887-RI	0.0910123	0.0706698	0.0259115	0.0625312
AAEL002888-RA	1.00847	2.29098	0.909858	1.4031
AAEL002888-RB	12.0899	12.7058	9.27292	11.3562
AAEL002890-RA	7.43138	5.53773	10.0779	7.68234
AAEL002890-RB	1.67141	2.28769	4.24422	2.73444
AAEL002890-RC	0	0	0	0
AAEL002890-RD	0	0	0	0
AAEL002891-RB	1.14246	0.663767	5.37546	2.3939
AAEL002892-RA	0.989687	0.525158	1.34064	0.951828
AAEL002892-RB	0	0	2.06e-08	6.86667e-09
AAEL002892-RC	0.0403237	0	0	0.0134412
AAEL002892-RD	0.0408855	0	0	0.0136285
AAEL002892-RE	0	0	0.0740201	0.0246734
AAEL002892-RF	0	0.229739	2.29227	0.84067
AAEL002893-RA	0	0	0.0174627	0.0058209
AAEL002895-RA	2.36219	1.51449	4.52339	2.80002
AAEL002896-RB	0.00123956	0.00118087	0.000469883	0.000963438
AAEL002896-RC	5.09e-05	4.03e-05	1.75e-05	3.62333e-05
AAEL002896-RD	0.000315234	0.000277397	0.000114578	0.000235736
AAEL002896-RE	0.00771291	0.00816903	0.00309249	0.00632481
AAEL002898-RA	8.50117	14.4461	36.9952	19.9808
AAEL002900-RA	44.9244	33.2707	51.7198	43.305
AAEL002903-RA	0.806173	0.595357	6.93443	2.77865
AAEL002903-RB	4.48e-05	1.87e-05	1.01327	0.337778
AAEL002903-RC	0.445943	0.0885113	0.19129	0.241915
AAEL002904-RA	0	0	0	0
AAEL002905-RA	1.08633	1.56709	6.46576	3.03973
AAEL002906-RA	15.284	19.739	17.0265	17.3498
AAEL002910-RB	4.29312	3.68591	5.35198	4.44367
AAEL002912-RA	20.6187	24.6739	17.8844	21.059
AAEL002913-RB	52.9445	73.3378	37.4711	54.5845
AAEL002916-RA	0	0	0.0790792	0.0263597
AAEL002917-RA	0.481416	0.306878	0.921517	0.569937
AAEL002918-RB	0.950413	0.467154	2.03458	1.15072
AAEL002921-RB	0.0123514	0.0128377	5.08932	1.70484
AAEL002922-RA	1.02228	1.14845	0.73346	0.968063
AAEL002924-RC	9.26395	6.0505	8.71574	8.01006
AAEL002924-RD	0.519854	0	1.93718	0.819011
AAEL002924-RE	0.628687	0.0781238	4.26959	1.6588
AAEL002924-RF	0.109806	0	0.611496	0.240434
AAEL002925-RA	0.644221	0.531767	1.06205	0.746013
AAEL002925-RB	0.261269	0.184072	0.466333	0.303891
AAEL002925-RC	0.0952311	0.131593	1.39142	0.539415
AAEL002929-RA	0	0	0.0333415	0.0111138
AAEL002930-RB	0.557903	0.607841	0.904097	0.689947
AAEL002932-RB	0	0	0	0
AAEL002933-RA	40.9297	35.3367	40.64	38.9688
AAEL002934-RB	5.37896	3.97822	9.45667	6.27128
AAEL002935-RC	0.635154	0.48446	1.77138	0.963665
AAEL002935-RD	0.0354461	0	0.0686322	0.0346928
AAEL002935-RE	0	0	0.12447	0.04149
AAEL002935-RF	1.33189	0.780263	0.926005	1.01272
AAEL002938-RA	13.7532	11.8127	18.4079	14.6579
AAEL002938-RB	0.819937	0.0953092	0.22059	0.378612
AAEL002940-RA	0.0270822	0	0	0.0090274
AAEL002943-RB	0.299446	0.289705	0.380163	0.323105
AAEL002944-RA	1.9629	2.04724	4.05684	2.68899
AAEL002948-RA	6.12492	8.07077	9.8206	8.00543
AAEL002949-RA	0	0	0.215411	0.0718037
AAEL002950-RB	1.65376	0.23771	2.42644	1.4393
AAEL002950-RC	2.36628	0.891611	13.352	5.53663
AAEL002951-RA	0.107378	0.223192	0.0141683	0.114913
AAEL002955-RA	0	0	0	0
AAEL002955-RB	0.107428	0.136799	0.0546422	0.0996231
AAEL002959-RA	0.273035	0.0887682	0.141728	0.167844
AAEL002960-RA	0	0	0	0
AAEL002961-RA	0	0	0	0
AAEL002962-RA	0	0	0.00605016	0.00201672
AAEL002964-RA	2.23896	1.29018	2.26072	1.92995
AAEL002965-RA	0	0.0276278	0	0.00920927
AAEL002967-RA	0.426227	0.443025	1.50343	0.790894
AAEL002969-RA	0.9503	0.377507	0.266492	0.531433
AAEL002972-RA	0.154814	0.0402319	0.275724	0.156923
AAEL002978-RA	20.5662	19.1358	40.5952	26.7657
AAEL002978-RB	7.31e-06	0.00032648	5.31e-06	0.000113033
AAEL002978-RC	0.541817	3.24896	17.5816	7.12413
AAEL002978-RD	30.3597	34.7165	27.4772	30.8511
AAEL002979-RA	1.14203	1.18654	3.44735	1.92531
AAEL002989-RA	1.75827	2.51863	6.36854	3.54848
AAEL002993-RA	57.4687	59.7925	65.783	61.0147
AAEL002996-RA	2.43738	2.23565	4.7795	3.15084
AAEL002999-RA	0.804947	0.417267	0.798235	0.673483
AAEL002999-RB	0.809573	0.839329	0.642258	0.76372
AAEL002999-RC	2.64792	1.29326	1.88233	1.94117
AAEL003000-RA	0.572745	0.0778468	0	0.216864
AAEL003002-RB	0.0351225	0.0182393	0.146061	0.0664743
AAEL003004-RB	6.68704	6.37443	14.995	9.35216
AAEL003008-RB	1.82095	1.91861	6.0567	3.26542
AAEL003012-RA	0	0	0	0
AAEL003016-RA	0	0	0	0
AAEL003016-RB	0	0	0	0
AAEL003016-RC	0.359269	0.470074	0.232575	0.353973
AAEL003018-RA	0.163375	0.190334	0.627066	0.326925
AAEL003018-RB	0.176917	0	7.66e-05	0.0589979
AAEL003018-RC	0	0	0	0
AAEL003019-RB	1.82226	1.84649	0.38548	1.35141
AAEL003019-RC	6.80062	3.63765	9.57404	6.67077
AAEL003020-RA	0	0	0	0
AAEL003022-RA	1.62349	0.728346	4.51768	2.28984
AAEL003022-RB	2.09697	1.63523	2.27588	2.00269
AAEL003026-RA	0	7.01e-10	3.6e-05	1.20002e-05
AAEL003026-RB	2.65e-09	0	0.00333743	0.00111248
AAEL003026-RC	1.01e-07	0	0.142516	0.0475054
AAEL003026-RD	1.23e-09	0	0.0015164	0.000505467
AAEL003026-RE	3.89e-07	0	0.569979	0.189993
AAEL003026-RF	0.00189586	0.114678	0	0.038858
AAEL003026-RG	0.164525	0	0	0.0548417
AAEL003032-RB	3.0003	3.07767	8.58802	4.88866
AAEL003034-RA	4.73427	6.35458	5.94436	5.67774
AAEL003035-RA	0.208875	0.126772	0.103254	0.1463
AAEL003036-RA	0.460211	0.317931	1.9408	0.906314
AAEL003039-RA	106.306	72.1391	88.5064	88.9838
AAEL003041-RA	0.0180486	0.0563431	0.0642316	0.0462078
AAEL003043-RB	0.0863193	0.0320016	0.058634	0.058985
AAEL003043-RC	0	0	0	0
AAEL003045-RA	0	0	0	0
AAEL003045-RB	0	0	0	0
AAEL003046-RB	127.293	60.8893	104.434	97.5388
AAEL003047-RB	1.02336	0.726326	1.60813	1.11927
AAEL003047-RC	5.69e-09	1.33e-09	5.03e-09	4.01667e-09
AAEL003049-RA	0.0390058	0	0.0231299	0.0207119
AAEL003100-RA	0	0	0	0
AAEL003100-RB	0	0	0	0
AAEL003100-RC	0	0.0288563	0.0823708	0.0370757
AAEL003103-RA	38.0746	24.2262	40.6054	34.3021
AAEL003103-RB	44.5539	47.0093	44.5463	45.3698
AAEL003103-RC	12.4596	12.0473	18.4611	14.3227
AAEL003107-RA	0.0456407	0.142618	0.189342	0.125867
AAEL003109-RA	9.42241	7.1684	11.5072	9.366
AAEL003109-RB	1.05407	2.64873	2.62465	2.10915
AAEL003109-RC	2.18667	1.10771	0.577937	1.29077
AAEL003154-RA	1.8504	0.918226	1.26098	1.3432
AAEL003156-RA	0	0.0748159	0.113468	0.0627613
AAEL003156-RB	0.023067	0	0	0.007689
AAEL003160-RA	587.938	597.46	1237.59	807.663
AAEL003161-RA	65.5404	51.2995	49.968	55.6026
AAEL003163-RB	0.0240649	0.0394259	0.0498124	0.0377677
AAEL003165-RA	6.95219	7.56266	9.93814	8.151
AAEL003170-RB	4.28658	5.90137	6.17347	5.45381
AAEL003173-RA	0.535425	0.0738794	0.584281	0.397862
AAEL003173-RB	0	0.0556992	0	0.0185664
AAEL003176-RA	0.494059	0.329852	1.15656	0.660157
AAEL003177-RA	0.139781	0.116599	0.0662135	0.107531
AAEL003179-RB	36.4494	32.2934	51.3997	40.0475
AAEL003180-RA	24.5213	27.4946	34.2961	28.7707
AAEL003181-RA	0	0	0	0
AAEL003182-RA	0	0	0.254183	0.0847277
AAEL003183-RA	0.205313	0.106989	0.195441	0.169248
AAEL003184-RC	0.413823	0.0481483	0.473165	0.311712
AAEL003184-RD	1.49669	1.77493	2.10767	1.7931
AAEL003184-RE	0.0410656	0.168488	0.114981	0.108178
AAEL003187-RA	0	0	0	0
AAEL003190-RA	21.5862	7.2814	12.9564	13.9413
AAEL003193-RA	11.5243	14.3852	20.8917	15.6004
AAEL003193-RB	40.2503	32.9549	42.586	38.5971
AAEL003194-RA	2.83327	1.65403	2.00207	2.16312
AAEL003196-RA	0	0	0	0
AAEL003198-RA	0	0	2.87e-07	9.56667e-08
AAEL003201-RA	0	0	0	0
AAEL003203-RC	16.2322	9.50941	18.1229	14.6215
AAEL003203-RD	85.3537	68.8515	55.6765	69.9606
AAEL003203-RE	1.04363	0.12787	0.274945	0.482148
AAEL003203-RF	1.05182	0.000921109	1.01174	0.68816
AAEL003206-RA	28.8959	45.8419	42.2987	39.0122
AAEL003211-RA	0	0	0.0658947	0.0219649
AAEL003211-RB	0.0734593	0.00953777	0	0.0276657
AAEL003213-RB	4.55299	4.44998	3.95791	4.32029
AAEL003214-RA	0.063066	0	0.0758731	0.046313
AAEL003228-RA	5.82991	3.58334	5.65192	5.02172
AAEL003228-RB	6.29e-06	0.527317	0	0.175774
AAEL003228-RC	0.292273	0	0.498726	0.263666
AAEL003229-RA	0.000228832	4.44e-05	0.000146132	0.000139788
AAEL003229-RB	10.6246	3.85113	9.42812	7.96795
AAEL003230-RA	10.7953	11.4399	10.4055	10.8802
AAEL003233-RA	0.247654	0.0367679	0.154054	0.146159
AAEL003237-RA	3.57496	5.08543	7.97535	5.54525
AAEL003238-RA	2.15214	3.13128	3.09299	2.79214
AAEL003239-RA	0	0	0	0
AAEL003243-RA	2.17923	0.774805	11.3314	4.76181
AAEL003253-RA	0	0.262192	0.174166	0.145453
AAEL003253-RB	0.479216	0	0	0.159739
AAEL003257-RB	0.163514	0	0	0.0545047
AAEL003260-RA	1.64097	0.711701	1.04257	1.13175
AAEL003262-RA	0	0	0.00601614	0.00200538
AAEL003267-RB	1.37085	1.52836	0.491637	1.13028
AAEL003267-RC	11.7995	7.57117	10.4686	9.94642
AAEL003271-RB	0.631885	0.381973	0.845966	0.619941
AAEL003275-RA	8.05214	3.90597	10.7092	7.55577
AAEL003277-RA	0.482672	0	1.57633	0.686334
AAEL003277-RB	0.0913526	0.0995523	0.3428	0.177902
AAEL003277-RC	0	0	0	0
AAEL003277-RD	0	0	0	0
AAEL003277-RE	0	0	0.194692	0.0648973
AAEL003277-RF	0	0	0	0
AAEL003277-RG	0	0	0	0
AAEL003277-RH	0	0.181063	0.255082	0.145382
AAEL003279-RA	2.20776	0.888897	1.15928	1.41865
AAEL003281-RB	8.62079	9.34642	8.42495	8.79739
AAEL003283-RB	0	0	0	0
AAEL003283-RC	0	0	0.0515758	0.0171919
AAEL003283-RD	0	0	0.0260768	0.00869227
AAEL003283-RE	0.439632	0.00332901	2.25342	0.898794
AAEL003283-RF	6.55021	2.21806	2.34676	3.70501
AAEL003283-RG	0	0	0	0
AAEL003283-RH	0	0	0	0
AAEL003329-RA	0	0	0	0
AAEL003340-RA	0	0	0	0
AAEL003341-RB	0	0	0	0
AAEL003353-RA	0	0	0	0
AAEL003490-RA	1.51449	1.68656	2.71635	1.97247
AAEL003491-RC	0	0	0	0
AAEL003491-RD	24.6106	23.2685	8.67966	18.8529
AAEL003491-RE	8.34488	11.7622	16.3961	12.1677
AAEL003491-RF	1.0231	4.02882	5.73086	3.59426
AAEL003495-RB	1.87995	1.66882	3.95921	2.50266
AAEL003495-RC	0	0	0	0
AAEL003495-RD	0	0	0.497738	0.165913
AAEL003501-RA	0	0	0	0
AAEL003503-RA	20.6659	14.5198	31.9629	22.3829
AAEL003504-RB	0.0192297	0	0	0.0064099
AAEL003506-RA	0.0782978	0.0305017	0.0348809	0.0478935
AAEL003581-RC	8.41137	1.64372	1.99918	4.01809
AAEL003581-RD	24.3583	16.5567	16.7639	19.2263
AAEL003582-RA	3252.85	3216.95	3096	3188.6
AAEL003597-RA	17.3629	11.4918	21.6543	16.8363
AAEL003597-RB	0.236346	0.526004	0.35418	0.372177
AAEL003599-RA	4.5742	1.23969	4.34978	3.38789
AAEL003599-RB	2.05545	1.57004	5.36213	2.99587
AAEL003599-RC	4.90287	3.6143	6.23821	4.91846
AAEL003600-RA	0.047439	0.222397	1.79905	0.689629
AAEL003601-RA	0.14231	0.596138	0.561953	0.433467
AAEL003605-RA	0.484419	0.660951	0.355395	0.500255
AAEL003605-RB	14.4446	14.6904	16.7271	15.2874
AAEL003606-RA	61.802	30.9077	39.7771	44.1623
AAEL003611-RA	9.51795	3.61819	3.57355	5.5699
AAEL003611-RB	2.85192	1.26482	0.00124587	1.37266
AAEL003613-RA	0	0	0	0
AAEL003613-RB	0	0.0340988	0.152969	0.0623559
AAEL003622-RA	0	0	0.0934561	0.031152
AAEL003622-RB	0	0	0	0
AAEL003622-RC	0	6.77e-10	0	2.25667e-10
AAEL003622-RD	0	0.13383	0.281729	0.13852
AAEL003628-RA	0.185154	0.0350219	0.0399436	0.0867065
AAEL003629-RA	0	0	0	0
AAEL003631-RA	0.484449	0.251904	0.179681	0.305345
AAEL003632-RA	0.104904	0.254681	0.0414858	0.13369
AAEL003634-RA	41.9334	41.7072	39.0977	40.9128
AAEL003645-RA	329.444	272.6	227.508	276.517
AAEL003742-RA	32.5346	161.01	27.4997	73.6814
AAEL003743-RA	0.494465	2.28884	1.64707	1.47679
AAEL003743-RB	6.81183	3.58288	4.60787	5.00086
AAEL003743-RC	0.295411	0.979493	0.657679	0.644194
AAEL003743-RD	9.48707	6.59602	8.3982	8.16043
AAEL003743-RE	1.65742	4.06e-08	7.45421	3.03721
AAEL003746-RA	21.4977	15.1991	33.9188	23.5385
AAEL003748-RA	31.0189	12.0939	54.4531	32.522
AAEL003749-RA	7.94137	6.64456	10.3296	8.30518
AAEL003749-RB	5.23347	5.16929	6.69958	5.70078
AAEL003750-RA	341.639	245.062	336.929	307.877
AAEL003752-RA	42.2359	51.3569	33.3833	42.3254
AAEL003754-RA	1.02894	0.729511	0.677119	0.811857
AAEL003754-RB	0	0	0	0
AAEL003754-RC	0	0	0	0
AAEL003754-RD	1.30372	1.14538	0.648826	1.03264
AAEL003754-RE	1.25797	0.806591	1.69094	1.25183
AAEL003754-RF	1.06744	0.171778	3.65421	1.63114
AAEL003755-RA	4.70091	4.58353	8.47425	5.91956
AAEL003756-RA	1.62726	1.3044	5.57648	2.83605
AAEL003757-RA	0	0	0	0
AAEL003758-RA	17.6554	9.62597	16.0031	14.4282
AAEL003758-RB	0	0	0	0
AAEL003762-RA	0	0	0.519992	0.173331
AAEL003762-RB	1.28765	0.834165	1.98749	1.36977
AAEL003762-RC	0.0152223	0.0472661	0.0571039	0.0398641
AAEL003762-RD	0.613447	2.38256	2.55744	1.85115
AAEL003763-RA	6.78104	8.83506	6.71366	7.44325
AAEL003764-RA	262.598	341.42	341.025	315.014
AAEL003766-RA	1.71992	0.450193	0.62698	0.932364
AAEL003768-RB	0	0	0	0
AAEL003768-RC	0.461421	0.271524	0.500276	0.411074
AAEL003768-RD	0.963052	0.00943703	2.83733	1.26994
AAEL003768-RE	8.79399	4.61289	4.48183	5.9629
AAEL003769-RB	35.544	39.3065	35.4905	36.7803
AAEL003770-RA	5.9551	6.99168	11.12	8.02226
AAEL003771-RA	0.106348	0.294089	2.73336	1.0446
AAEL003771-RB	3.38004	3.60121	5.99592	4.32572
AAEL003772-RB	0.0417929	0	0.0496612	0.0304847
AAEL003773-RA	0	0.0151558	0.622817	0.212658
AAEL003774-RA	39.107	51.7878	41.7913	44.2287
AAEL003776-RA	6.30345	5.5432	7.32407	6.39024
AAEL003777-RB	0.429087	0	0.678237	0.369108
AAEL003777-RC	2.94e-05	0.0881904	0	0.0294066
AAEL003777-RD	3.68009	0.695887	4.22699	2.86766
AAEL003777-RE	0	0	9.66e-08	3.22e-08
AAEL003777-RF	0	0	1.71e-07	5.7e-08
AAEL003777-RG	0.105226	0	0.0689255	0.0580505
AAEL003779-RB	2.69943	1.29476	4.37889	2.79103
AAEL003781-RA	0	0	0.245537	0.0818457
AAEL003781-RB	4.59696	3.93916	5.30997	4.61536
AAEL003782-RA	0.189369	0.109542	0.0997898	0.1329
AAEL003785-RA	15.9066	17.2276	18.6495	17.2612
AAEL003785-RB	2.46085	0.305719	2.03997	1.60218
AAEL003789-RB	2.66407	1.53605	7.0474	3.74917
AAEL003789-RC	6.39752	2.21326	10.1829	6.26456
AAEL003791-RA	9.8466	14.3759	10.9899	11.7375
AAEL003794-RB	0	0	0.100013	0.0333377
AAEL003797-RA	0	0	0.306938	0.102313
AAEL003801-RA	34.7822	37.786	28.7074	33.7585
AAEL003803-RA	0.63004	1.13487	0.542567	0.769159
AAEL003806-RB	0	0.0191956	0.304495	0.107897
AAEL003809-RA	0.0390338	0.0405926	0.03089	0.0368388
AAEL003810-RA	0	0	0	0
AAEL003812-RB	0.881175	0.726083	1.64701	1.08476
AAEL003812-RC	0	0	0	0
AAEL003812-RD	2.75719	1.95986	1.19187	1.96964
AAEL003812-RE	0	0	0	0
AAEL003812-RF	1.209	0.415213	3.65875	1.76099
AAEL003812-RG	0	0	0.330614	0.110205
AAEL003813-RB	1.14493	2.45705	1.91428	1.83875
AAEL003813-RC	0	0	0	0
AAEL003813-RD	0.0592497	0	0	0.0197499
AAEL003883-RB	6.21366	3.5786	10.5682	6.78682
AAEL003903-RA	3.40957	0.644005	7.71254	3.92204
AAEL003903-RB	0	0.066438	0.212269	0.0929023
AAEL003903-RC	11.8131	7.23398	18.922	12.6564
AAEL003905-RA	0	0	0.000614253	0.000204751
AAEL003905-RB	0	0	5.12e-07	1.70667e-07
AAEL003905-RC	0	0	0	0
AAEL003905-RD	0	0	0	0
AAEL003905-RE	0	0	0.0298854	0.0099618
AAEL003906-RA	0.971869	0.631979	3.66502	1.75629
AAEL003907-RB	5.1513	5.60525	6.29806	5.68487
AAEL003908-RA	6.13014	7.22101	6.62563	6.65893
AAEL003909-RA	6.06003	4.67462	6.08839	5.60768
AAEL003910-RB	0.331123	0.500359	0.297991	0.376491
AAEL003911-RB	5.05592	3.64714	7.37209	5.35838
AAEL003912-RA	14.1068	13.8716	19.0312	15.6699
AAEL003913-RA	3.08082	3.32321	4.59689	3.66697
AAEL003914-RB	0.592564	0.936567	0.430132	0.653088
AAEL003914-RC	0.327827	0	0.269958	0.199262
AAEL003914-RD	0	0	0	0
AAEL003914-RE	7.79e-07	0	0	2.59667e-07
AAEL003914-RF	0	0	0	0
AAEL003914-RG	0	4.32e-07	0	1.44e-07
AAEL003914-RH	0.16652	2.53e-10	0.315448	0.160656
AAEL003915-RA	0.0360417	0	0.0427555	0.0262657
AAEL003916-RA	12.7393	10.1548	16.1544	13.0162
AAEL003917-RA	5.99657	2.29195	7.06331	5.11728
AAEL003917-RB	0	0	0.285562	0.0951873
AAEL003917-RC	0.000886785	3.00981	0.497091	1.16926
AAEL003918-RB	0	0	4.02e-09	1.34e-09
AAEL003918-RC	0.0316837	0.0328482	0.452233	0.172255
AAEL003918-RD	0.278247	0.145915	0.300935	0.241699
AAEL003919-RA	0.419931	0.282955	1.22203	0.641639
AAEL003919-RB	0	0.100354	0.450894	0.183749
AAEL003919-RC	0.239792	0	0.34071	0.193501
AAEL003921-RA	20.0598	20.9137	26.4909	22.4881
AAEL003922-RA	4.90524	7.461	6.08812	6.15145
AAEL004042-RE	62.5533	56.5249	57.3826	58.8203
AAEL004042-RF	17.2732	16.1323	37.9278	23.7778
AAEL004043-RA	36.5617	47.4266	21.8605	35.2829
AAEL004046-RB	0.444965	0.118261	0.18438	0.249202
AAEL004048-RA	1.67133	0.441978	3.04424	1.71918
AAEL004050-RA	2.65823	2.10961	1.9611	2.24298
AAEL004052-RA	8.17799	5.11796	11.637	8.31098
AAEL004053-RA	9.59574	11.4554	16.5146	12.5219
AAEL004054-RA	39.3608	9.36996	31.4614	26.7307
AAEL004055-RA	2.61956	2.95584	8.12025	4.56522
AAEL004056-RB	8.54088	10.0495	15.8852	11.4919
AAEL004057-RB	0.482652	0.31688	0.658203	0.485912
AAEL004057-RC	4.35037	5.38211	4.6404	4.79096
AAEL004059-RB	70.2186	48.3812	58.7262	59.1087
AAEL004060-RB	229.429	289.417	310.44	276.429
AAEL004060-RC	9.09133	4.66979	8.91808	7.55973
AAEL004063-RB	29.0814	34.048	18.2306	27.12
AAEL004064-RB	1.07164	1.23772	1.86972	1.39303
AAEL004065-RA	68.7229	61.2144	64.0259	64.6544
AAEL004067-RA	192.343	161.652	183.869	179.288
AAEL004068-RA	5.8799	5.77896	9.34831	7.00239
AAEL004069-RA	57.4636	60.1414	62.9458	60.1836
AAEL004070-RA	4.42825	3.55679	6.4334	4.80615
AAEL004071-RA	158.585	150.891	152.419	153.965
AAEL004074-RA	1.14537	2.32634	3.9848	2.4855
AAEL004074-RB	3.064	8.33e-05	3.19885	2.08764
AAEL004075-RA	13.0269	15.3135	8.60094	12.3138
AAEL004076-RC	2.15866	1.97712	2.35126	2.16235
AAEL004076-RD	16.7516	17.7088	21.2798	18.5801
AAEL004081-RA	24.423	23.8646	43.6843	30.6573
AAEL004155-RA	0	0	0.236293	0.0787643
AAEL004163-RA	0.117597	0.271655	1.0239	0.471051
AAEL004167-RA	31.2382	21.3216	24.6092	25.723
AAEL004169-RA	27.7929	9.32855	33.2689	23.4634
AAEL004179-RA	1.59883	0.935424	0.00321014	0.845821
AAEL004179-RB	0	0.728122	0.889488	0.539203
AAEL004180-RB	5.73337	5.47062	6.06801	5.75733
AAEL004193-RB	0.611309	0.722723	0.991394	0.775142
AAEL004193-RC	1.68021	0.399299	0.811553	0.963687
AAEL004193-RD	3.72125	1.55776	0.451019	1.91001
AAEL004193-RE	0.272395	1.039	1.12534	0.812245
AAEL004193-RF	0	0.80599	0.693179	0.499723
AAEL004193-RG	0	0	0	0
AAEL004193-RH	9.82497	7.89444	5.73756	7.81899
AAEL004195-RA	55.4487	31.715	54.7	47.2879
AAEL004217-RB	2.78e-07	0	0	9.26667e-08
AAEL004217-RC	0	0	0	0
AAEL004217-RD	0	0	0	0
AAEL004217-RE	0	0	0	0
AAEL004217-RF	1.17e-05	0	0	3.9e-06
AAEL004217-RG	0	0	0	0
AAEL004217-RH	0.167895	0	0	0.055965
AAEL004217-RI	0	0	0	0
AAEL004217-RJ	0	0.0769292	0.0704425	0.0491239
AAEL004227-RD	32.8952	21.039	21.5006	25.1449
AAEL004227-RE	91.27	78.2414	53.9828	74.4981
AAEL004227-RF	0.180638	1.44953	0.199995	0.610054
AAEL004228-RA	11.8313	11.1106	17.534	13.492
AAEL004229-RA	3.25036	7.96153	4.15041	5.12077
AAEL004231-RA	0	0	0	0
AAEL004231-RB	0	0	0	0
AAEL004231-RC	0	0	0.153988	0.0513293
AAEL004233-RB	0	0	0	0
AAEL004233-RC	0.00372573	0	0.026333	0.0100196
AAEL004233-RD	0.0110561	0	0	0.00368537
AAEL004234-RA	28.8651	24.0864	49.974	34.3085
AAEL004235-RA	0.540364	0.368491	6.18885	2.3659
AAEL004235-RB	3.10534	1.81788	3.11518	2.67947
AAEL004235-RC	0	0	0	0
AAEL004235-RD	0.0844504	0	0.529428	0.204626
AAEL004235-RE	0.0264681	0.0315931	0.556327	0.204796
AAEL004235-RF	0.134598	0	0.71774	0.284113
AAEL004235-RG	0.0605082	0.0369111	0.346576	0.147998
AAEL004235-RH	0.0913509	0	0	0.0304503
AAEL004235-RI	0	0	0.229896	0.076632
AAEL004235-RJ	0	0	2.06e-05	6.86667e-06
AAEL004235-RK	0	0	0	0
AAEL004236-RA	0.0402255	0	0.142739	0.0609882
AAEL004236-RB	0	0	0	0
AAEL004236-RC	0	0.0444591	0.199992	0.0814837
AAEL004236-RD	1.03704	1.61734	2.02264	1.55901
AAEL004236-RE	1.16678	0.433607	1.51371	1.03803
AAEL004236-RF	9.34488	4.6219	5.33155	6.43278
AAEL004237-RA	2.18554	2.26144	3.32894	2.59197
AAEL004238-RA	0.480373	0.455124	0.250353	0.395283
AAEL004239-RA	0.804246	0	0.152276	0.318841
AAEL004240-RA	0.168549	0.269549	0.138546	0.192215
AAEL004242-RA	10.3202	6.70348	14.3246	10.4494
AAEL004242-RB	0.131036	0.145407	0	0.0921477
AAEL004243-RA	1.90431	2.01559	4.16677	2.69556
AAEL004244-RA	0.0427021	0.0517252	1.78479	0.626406
AAEL004245-RB	0.014233	0.014716	0.168011	0.0656533
AAEL004275-RA	0	0	0	0
AAEL004280-RA	0	0	0	0
AAEL004298-RA	0	0	0	0
AAEL004303-RB	0	0	0.0131234	0.00437447
AAEL004386-RA	0	0.0590786	99.9731	33.3441
AAEL004388-RA	0	0.029314	17.099	5.70944
AAEL004389-RB	0.453378	0.292671	1.27412	0.67339
AAEL004390-RA	0	0.132233	102.796	34.3094
AAEL004392-RB	0.62836	0.462719	0.928796	0.673292
AAEL004396-RB	0.0735807	0.0208335	5.3986	1.831
AAEL004397-RA	8.3459	4.29261	11.1879	7.94214
AAEL004398-RB	0.0899623	0.0400774	0	0.0433466
AAEL004399-RB	0.0295805	0.0306942	0.180899	0.0803912
AAEL004404-RA	64.2127	91.7996	65.6378	73.8834
AAEL004410-RB	9.1e-07	0	0.981402	0.327134
AAEL004410-RC	0.867232	0.471101	1.14409	0.827474
AAEL004410-RD	0.384362	0.138634	0.2269	0.249965
AAEL004524-RA	0	0.0158758	0.542199	0.186025
AAEL004524-RB	0.457597	0.147652	0	0.20175
AAEL004528-RA	2.67669	1.1796	2.88504	2.24711
AAEL004543-RB	0.0622087	0	0.404964	0.155724
AAEL004544-RB	0.0116232	0	0.0414526	0.0176919
AAEL004546-RA	35.0255	29.8771	37.108	34.0035
AAEL004547-RA	0.154879	0.0856278	0.143958	0.128155
AAEL004547-RB	15.0297	2.69151	2.21282	6.64468
AAEL004551-RA	3.04366	1.47518	9.45381	4.65755
AAEL004552-RA	4.44631	2.75376	7.39442	4.86483
AAEL004553-RA	70.7847	51.5516	43.4214	55.2526
AAEL004554-RA	0.375778	0.686219	1.29476	0.785586
AAEL004554-RC	9.82729	9.45113	11.8379	10.3721
AAEL004555-RA	0.0644192	0.167517	0.420445	0.21746
AAEL004557-RB	0	0	0	0
AAEL004558-RA	11.3708	12.16	6.53495	10.0219
AAEL004559-RB	0.111402	0	0.362341	0.157914
AAEL004559-RC	0	0.185207	0.127413	0.104207
AAEL004559-RD	0.109373	0.232751	7.19607	2.51273
AAEL004559-RE	0	0.0269834	0.0114764	0.0128199
AAEL004559-RF	0	1.09e-08	2.85e-09	4.58333e-09
AAEL004559-RG	0.126313	0	0	0.0421043
AAEL004559-RH	0	3.56e-08	1.75e-08	1.77e-08
AAEL004559-RI	0.00741542	0.541291	0.533716	0.360807
AAEL004559-RJ	4.43303	2.16225	4.40452	3.6666
AAEL004559-RK	0.00186173	0.0870931	0.0704536	0.0531361
AAEL004561-RA	0.706058	0.0948933	0.782899	0.52795
AAEL004562-RA	0.0257261	0.195934	2.57793	0.933197
AAEL004563-RA	30.0256	31.2282	34.3582	31.8707
AAEL004564-RA	0	0	0.0222183	0.0074061
AAEL004566-RA	13.6612	11.1066	15.4398	13.4025
AAEL004567-RA	36.8799	24.3404	26.0614	29.0939
AAEL004568-RA	1.34414	0.63706	0.628824	0.870008
AAEL004569-RA	0.728822	0.741579	1.5042	0.991534
AAEL004570-RA	3.3725	3.56641	8.79098	5.2433
AAEL004571-RA	0.770388	0.484134	4.24726	1.83393
AAEL004572-RB	0.0112609	0.0074448	0.0822068	0.0336375
AAEL004572-RC	0.0653435	0.107584	0.122181	0.0983695
AAEL004573-RB	0	0	0	0
AAEL004574-RA	7.57415	8.22528	7.0945	7.63131
AAEL004575-RA	0.163482	0.230561	0.193189	0.195744
AAEL004575-RB	27.8995	26.4476	16.8913	23.7461
AAEL004576-RA	0.142226	0.349447	0.782935	0.424869
AAEL004577-RA	2.7725	3.09309	4.30131	3.38897
AAEL004579-RA	0	0	0.57991	0.193303
AAEL004579-RB	2.77341	0.940394	4.12472	2.61284
AAEL004580-RA	7.08352	0	5.9373	4.34027
AAEL004580-RB	0	0	0	0
AAEL004580-RC	1.41251	3.78186	2.08337	2.42591
AAEL004581-RA	0.988439	1.24822	2.65341	1.63002
AAEL004581-RB	0.318254	0	0.626611	0.314955
AAEL004581-RC	0	0	0	0
AAEL004582-RB	0.878926	0.225373	1.40987	0.838056
AAEL004602-RA	0	0	0	0
AAEL004603-RA	58.7779	76.6007	87.8961	74.4249
AAEL004605-RA	0	0	0	0
AAEL004607-RA	23.3797	11.2664	26.1192	20.2551
AAEL004608-RA	0.270617	1.52593	0.329523	0.70869
AAEL004608-RB	3.02891	3.06588	3.79762	3.29747
AAEL004613-RA	52.0249	69.1495	55.8799	59.0181
AAEL004616-RA	146.441	173.52	166.466	162.142
AAEL004620-RB	11.0574	7.77029	16.1877	11.6718
AAEL004620-RC	1.9105	2.7956	5.11599	3.27403
AAEL004623-RB	2.95899	3.45511	7.36377	4.59262
AAEL004624-RB	0	0	8.27543	2.75848
AAEL004625-RA	4.97187	4.52736	8.39512	5.96478
AAEL004630-RA	0.292266	0.144695	0.566118	0.33436
AAEL004630-RB	1.21939	0.615069	2.23333	1.35593
AAEL004631-RA	23.2872	48.9685	25.5351	32.5969
AAEL004633-RA	6.36233	3.71359	5.75793	5.27795
AAEL004633-RB	0	0.858378	0.85115	0.569843
AAEL004634-RA	0.403894	0.200982	4.0292	1.54469
AAEL004634-RB	0.393226	0.639107	1.1089	0.713744
AAEL004643-RA	20.9765	24.2517	15.632	20.2867
AAEL004645-RB	0.633672	0.413852	2.38686	1.14479
AAEL004646-RA	26.1112	77.2565	44.3759	49.2479
AAEL004648-RA	0	0	0	0
AAEL004685-RA	5.91346	4.98856	7.8215	6.24117
AAEL004686-RA	26.513	27.7851	17.2367	23.8449
AAEL004688-RB	2.51159	5.91e-06	2.57961	1.69707
AAEL004688-RC	3.84592	1.92959	5.76372	3.84641
AAEL004688-RD	5.15146	1.31595	3.58857	3.35199
AAEL004688-RE	1.27126	0.788417	1.6035	1.22106
AAEL004688-RF	0	1.24469	0.966146	0.736945
AAEL004688-RG	2.06e-05	9.26e-08	1.45997	0.486664
AAEL004689-RA	0.80661	0.371297	1.00234	0.726749
AAEL004689-RB	1.91e-06	0	0.99375	0.331251
AAEL004689-RC	0	0	0	0
AAEL004689-RD	0	0.0694753	0	0.0231584
AAEL004689-RE	0.569198	0	0.417226	0.328808
AAEL004689-RF	0.870793	0.538964	1.2789	0.896219
AAEL004690-RB	0	0.153936	0.667466	0.273801
AAEL004690-RC	0.40385	0	0.631839	0.34523
AAEL004691-RA	71.7845	83.2226	110.904	88.637
AAEL004691-RB	0.412283	0.136247	0.148654	0.232395
AAEL004692-RB	0.562036	0.0905969	0.748279	0.466971
AAEL004692-RC	0	0	0	0
AAEL004694-RA	0	0	0.296235	0.098745
AAEL004694-RB	0	0.0244383	0.138293	0.0542438
AAEL004694-RC	2.21103	1.03873	1.97972	1.74316
AAEL004694-RD	0.163534	7.4e-09	1.21098	0.458171
AAEL004694-RE	0.0667105	2.86e-09	1.07328	0.379997
AAEL004694-RF	0.252369	1.24635	0.0578978	0.518872
AAEL004694-RG	0	6.27e-07	0.0228943	0.00763164
AAEL004694-RH	0	0	0	0
AAEL004696-RA	0	0	0	0
AAEL004697-RA	0.533584	1.23211	1.68492	1.1502
AAEL004697-RB	8.26066	7.95343	10.1454	8.7865
AAEL004697-RC	5.21745	0.933919	8.18189	4.77775
AAEL004698-RA	0.0658817	0.0958819	3.16007	1.10728
AAEL004699-RA	361.16	169.647	263.666	264.824
AAEL004700-RA	0.0633229	0	0.688501	0.250608
AAEL004700-RB	0	0	0.363668	0.121223
AAEL004700-RC	0	2.35e-08	2.29e-06	7.71167e-07
AAEL004700-RD	0	0.0181643	1.16403	0.394065
AAEL004701-RA	2.33656	0.663275	0.57256	1.1908
AAEL004702-RA	6.28966	5.27278	8.18469	6.58238
AAEL004702-RB	0.557324	0.0927198	0.403272	0.351105
AAEL004703-RA	0	0	0.111407	0.0371357
AAEL004705-RA	0	0	0	0
AAEL004707-RA	0	0	0.0749763	0.0249921
AAEL004809-RA	11.7627	7.25639	8.77285	9.26398
AAEL004824-RB	0.0555709	0.0980539	0.0858849	0.0798366
AAEL004863-RB	1.68478	0.363052	3.45877	1.83553
AAEL004865-RA	47.3737	27.2079	52.8366	42.4727
AAEL004866-RA	14.4223	12.7882	13.2393	13.4833
AAEL004867-RB	4.13288	3.76721	6.15047	4.68352
AAEL004868-RA	2.48085	2.80733	6.54769	3.94529
AAEL004869-RA	2.65484	1.41371	8.52588	4.19814
AAEL004870-RA	4.92399	12.2478	6.40155	7.85778
AAEL004872-RB	0.028154	0	0	0.00938467
AAEL004872-RC	0	0	0.0545199	0.0181733
AAEL004873-RA	5.91354	7.84774	11.0072	8.25616
AAEL004873-RB	1.36944	0.0235273	0	0.464322
AAEL004874-RA	2.09531	1.43539	3.33234	2.28768
AAEL004874-RB	0	0.515474	0.797418	0.437631
AAEL004875-RA	0.26769	0.280583	3.04592	1.19806
AAEL004875-RB	0.301791	0.334605	0.144114	0.26017
AAEL004875-RC	0.367046	2.54e-09	0.549795	0.305614
AAEL004876-RA	0.000387479	0	0.000421456	0.000269645
AAEL004876-RB	0	0	0	0
AAEL004876-RC	0.00867339	0	0.0103441	0.00633916
AAEL004877-RA	1.42478	1.54083	3.46669	2.1441
AAEL004879-RA	15.1166	14.5145	22.652	17.4277
AAEL004881-RB	0.0346531	0.0357687	0.219907	0.0967763
AAEL004883-RB	0	0	0	0
AAEL004883-RC	0	0.0107011	0	0.00356703
AAEL004883-RD	0	0	0	0
AAEL004884-RA	5.69229	3.55532	8.13245	5.79335
AAEL004885-RB	0.0462218	0.0640955	0.310855	0.140391
AAEL004889-RA	3.29151	2.45018	5.58356	3.77508
AAEL004891-RB	1.71494	2.37756	5.07233	3.05494
AAEL004892-RB	2.46629	2.34117	6.46953	3.759
AAEL005047-RA	0.751018	0.796296	1.39979	0.982368
AAEL005048-RC	0	0.131874	0.0952762	0.0757167
AAEL005048-RD	9.51183	6.65363	14.8252	10.3302
AAEL005048-RE	3.1057	1.92616	2.77327	2.60171
AAEL005049-RA	0	0.172276	8.28726	2.81985
AAEL005052-RA	22.3061	22.2793	22.7303	22.4386
AAEL005052-RB	28.1829	23.5334	25.3358	25.684
AAEL005053-RB	0.638428	0.958377	1.51634	1.03772
AAEL005054-RA	45.0705	45.8474	35.836	42.2513
AAEL005058-RA	0.654255	0.589609	0.98369	0.742518
AAEL005060-RB	0	0	0.0250132	0.00833773
AAEL005061-RA	2.64306	2.04031	2.58468	2.42268
AAEL005064-RA	1.59418	0.995469	11.8126	4.80075
AAEL005068-RA	2.77173	2.90547	4.22695	3.30138
AAEL005068-RB	0.0299689	0.516174	1.17654	0.574228
AAEL005069-RA	75.2666	71.464	60.3808	69.0371
AAEL005070-RA	5.74352	3.8003	7.34551	5.62978
AAEL005071-RA	5.07e-07	1.0597	2.00417	1.02129
AAEL005071-RB	0.299183	0	0.798235	0.365806
AAEL005071-RC	0.33473	0.263141	3.00383	1.20057
AAEL005071-RD	1.50199	0	0.368984	0.623658
AAEL005072-RA	0.624256	0.435514	0.509199	0.52299
AAEL005073-RB	0.0843574	0.0101826	0.105789	0.0667763
AAEL005073-RC	0.0843574	0.0101826	0.105789	0.0667763
AAEL005074-RB	0.00101537	0.415949	0.657031	0.357998
AAEL005074-RC	0.149187	0	0	0.049729
AAEL005074-RD	0	0.027895	0	0.00929833
AAEL005074-RE	0.35722	0.0507968	1.45051	0.619509
AAEL005074-RF	0	0.265828	0	0.0886093
AAEL005074-RG	0	0	0	0
AAEL005075-RA	9.47005	11.11	8.718	9.76602
AAEL005076-RB	2.52e-08	0.0254076	0	0.00846921
AAEL005076-RC	1.32e-06	0	9.5e-07	7.56667e-07
AAEL005076-RD	0.0425062	0	0.0421262	0.0282108
AAEL005079-RB	0	0	0	0
AAEL005079-RC	0.107794	0.280417	0.0852501	0.15782
AAEL005080-RA	5.42996	6.50042	7.23986	6.39008
AAEL005084-RA	15.5458	15.4562	21.8488	17.6169
AAEL005086-RA	0.730252	0.248221	2.93496	1.30448
AAEL005086-RB	0	0	0.191158	0.0637193
AAEL005160-RB	0	0	0	0
AAEL005160-RC	0.273543	0.0788992	2.2756	0.876014
AAEL005160-RD	0	0	0	0
AAEL005162-RA	30.2235	35.844	29.0654	31.711
AAEL005162-RB	2.14588	0	3.02874	1.72487
AAEL005163-RA	46.057	52.1572	32.1196	43.4446
AAEL005165-RD	88.2456	77.1995	35.8407	67.0953
AAEL005165-RE	3.67057	3.93816	4.07347	3.89407
AAEL005165-RF	26.984	23.6902	27.1528	25.9423
AAEL005165-RG	179.986	132.518	172.186	161.563
AAEL005169-RA	5.32627	3.97304	6.65112	5.31681
AAEL005242-RA	0.829794	0.456505	0.785182	0.690494
AAEL005243-RB	0.0571881	0.019789	0.0302126	0.0357299
AAEL005247-RA	0	0	0	0
AAEL005247-RB	0	0	0.0153808	0.00512693
AAEL005254-RA	5.10181	4.59916	7.19375	5.63157
AAEL005261-RB	10.832	7.34176	11.9356	10.0365
AAEL005266-RC	24.9878	37.1697	31.9482	31.3686
AAEL005266-RD	3427.29	3278.34	2943.27	3216.3
AAEL005271-RB	2.90379	3.18384	1.95215	2.67993
AAEL005271-RC	6.0065	4.54096	8.29486	6.28077
AAEL005278-RA	0	0	0.00943259	0.0031442
AAEL005278-RB	0	0	0	0
AAEL005279-RA	2.45069	2.11149	3.61811	2.72676
AAEL005281-RA	1.93733	0.885858	3.21673	2.01331
AAEL005281-RB	0	0	0.0625952	0.0208651
AAEL005400-RA	2.86e-09	1.35548	0.972466	0.775982
AAEL005400-RAA	6.16e-11	0	0	2.05333e-11
AAEL005400-RAB	0.913966	1.20688	0.952627	1.02449
AAEL005400-RAC	2.78383	2.68814	1.45144	2.3078
AAEL005400-RAD	0	0.208826	0	0.0696087
AAEL005400-RAE	0.501449	1.88e-09	0	0.16715
AAEL005400-RB	12.6136	14.8287	16.5691	14.6705
AAEL005400-RC	2.52552	1.202	2.15428	1.9606
AAEL005400-RD	0.268824	1.27e-10	2.18456	0.817795
AAEL005400-RE	0	0	0	0
AAEL005400-RF	0	0	0	0
AAEL005400-RG	0.765339	0.429985	0.55218	0.582501
AAEL005400-RH	0.723822	0.369356	0.436469	0.509882
AAEL005400-RI	0.148113	0	0	0.049371
AAEL005400-RJ	0.000232956	0	0	7.7652e-05
AAEL005400-RK	0.867205	0.190492	0	0.352566
AAEL005400-RL	0.275059	0.191326	0.177804	0.21473
AAEL005400-RM	0	0.419869	0.135565	0.185145
AAEL005400-RN	1.88537	1.5496	3.02001	2.15166
AAEL005400-RO	0	0.383192	0.111353	0.164848
AAEL005400-RP	0	0	0	0
AAEL005400-RQ	0.422531	0.305789	1.85202	0.860113
AAEL005400-RR	0.513999	0.360927	0.405431	0.426786
AAEL005400-RS	4.29582	2.82864	0	2.37482
AAEL005400-RT	0	0	0	0
AAEL005400-RU	0.513635	0.443433	0.249972	0.402347
AAEL005400-RV	0	0.0802216	0	0.0267405
AAEL005400-RW	0	4.58e-09	0	1.52667e-09
AAEL005400-RX	0.820211	0.785465	0.572074	0.725917
AAEL005400-RY	0	0	0	0
AAEL005400-RZ	1.22337	1.74955	2.36478	1.77923
AAEL005401-RA	411.291	543.102	323.751	426.048
AAEL005401-RB	1786.79	2278.47	1710.5	1925.25
AAEL005402-RB	1.39608	1.6734	2.59795	1.88914
AAEL005403-RA	1.21494	1.04039	3.75032	2.00188
AAEL005405-RA	19.4178	12.9701	19.5369	17.3083
AAEL005406-RA	3.39574	2.76294	5.87098	4.00989
AAEL005407-RD	4.53292	3.86274	7.28832	5.22799
AAEL005407-RE	2.29207	1.89311	2.66081	2.282
AAEL005408-RA	11.2518	9.22931	16.5957	12.3589
AAEL005409-RA	0.0290313	0	0	0.0096771
AAEL005410-RA	7.55574	4.69309	13.4524	8.56708
AAEL005411-RA	28.5115	22.9	13.4206	21.6107
AAEL005411-RB	12.7613	6.37454	9.04906	9.39497
AAEL005411-RC	0.87302	0.567103	0.780741	0.740288
AAEL005412-RA	0.183785	1.37256	1.25354	0.936628
AAEL005412-RB	0.789192	0	0.507276	0.432156
AAEL005412-RC	0	0	0	0
AAEL005413-RB	14.2069	18.5464	12.0845	14.9459
AAEL005414-RA	30.2477	41.142	37.9156	36.4351
AAEL005415-RA	8.90193	8.41777	11.9902	9.76997
AAEL005417-RA	1.24527	1.37712	3.35058	1.99099
AAEL005417-RB	0.700825	0	0	0.233608
AAEL005419-RA	7.89546	4.51704	9.68704	7.36651
AAEL005420-RA	1.09763	1.09292	1.03658	1.07571
AAEL005422-RA	3.7308	2.9358	13.8954	6.854
AAEL005423-RA	0.718671	0.277693	2.5228	1.17305
AAEL005423-RB	0.217377	0.262707	0	0.160028
AAEL005425-RB	1.86105	1.16219	6.09407	3.0391
AAEL005426-RA	2.15991	2.28083	6.38807	3.6096
AAEL005428-RA	244.548	163.994	657.549	355.364
AAEL005429-RA	77.6495	128.725	68.4531	91.6092
AAEL005429-RB	8.11784	9.11723	7.0621	8.09906
AAEL005431-RA	2.79397	0.919708	0.803885	1.50585
AAEL005432-RA	119.394	86.0302	125.193	110.206
AAEL005432-RB	79.635	67.3362	82.0888	76.3533
AAEL005432-RC	6.98026	4.95562	8.39651	6.77746
AAEL005437-RA	0	0	0.00021347	7.11567e-05
AAEL005437-RB	0	0	0.00648592	0.00216197
AAEL005438-RA	1.72629	1.72049	3.23215	2.22631
AAEL005440-RC	0.0366631	0.0952452	0.0434821	0.0584635
AAEL005440-RD	0	1.26e-05	0	4.2e-06
AAEL005440-RE	0	2.83e-09	0	9.43333e-10
AAEL005440-RF	0	0.0417854	0.0959527	0.0459127
AAEL005444-RB	0.697975	0.120735	0	0.272903
AAEL005444-RC	1.0858	0	0	0.361933
AAEL005444-RD	1.5767	0	0	0.525567
AAEL005500-RA	17.3047	15.3141	22.5859	18.4016
AAEL005500-RB	2.51232	1.13707	2.28606	1.97848
AAEL005504-RC	5.58276	4.52479	6.88132	5.66296
AAEL005507-RA	0.0472205	0.0760173	0	0.0410793
AAEL005507-RB	0	5.42e-08	0	1.80667e-08
AAEL005507-RC	0	0	0	0
AAEL005507-RD	0	1.63e-10	0	5.43333e-11
AAEL005507-RE	0	7.79e-09	0.0725087	0.0241696
AAEL005507-RF	0	2.32e-07	0	7.73333e-08
AAEL005507-RG	2.92e-06	2.64e-06	0	1.85333e-06
AAEL005507-RH	0	6.15e-07	0.0881415	0.0293807
AAEL005507-RI	0	0.0024579	0.140104	0.0475206
AAEL005508-RA	80.0113	84.6758	79.8303	81.5058
AAEL005510-RA	2.2359	1.50758	3.65037	2.46462
AAEL005510-RB	0.114784	0	0	0.0382613
AAEL005515-RF	1.37045	2.42836	0.00710413	1.26864
AAEL005515-RG	44.4706	22.1196	23.3393	29.9765
AAEL005515-RH	60.4964	43.461	21.3295	41.7623
AAEL005515-RI	169.469	142.653	140.735	150.952
AAEL005515-RJ	1.4463	1.50407	6.07229	3.00755
AAEL005515-RK	0	0	0	0
AAEL005515-RL	130.341	96.7256	163.538	130.202
AAEL005515-RM	100.883	108.092	85.7149	98.23
AAEL005518-RA	1.24952	0.650106	0.397563	0.76573
AAEL005520-RC	4.02398	4.96385	9.0371	6.00831
AAEL005520-RD	1.8181	0.33509	3.0913	1.74816
AAEL005520-RE	8.57478	7.91293	7.29732	7.92834
AAEL005521-RA	7.37634	5.41546	11.5752	8.12233
AAEL005522-RB	13.1728	14.5771	15.3724	14.3741
AAEL005524-RA	246.666	175.572	189.615	203.951
AAEL005524-RB	26.7566	18.1307	29.5056	24.7976
AAEL005526-RB	0.270243	0	0	0.090081
AAEL005526-RC	1.98047	1.54609	2.45787	1.99481
AAEL005526-RD	0.327643	0.702131	0.622992	0.550922
AAEL005526-RE	0	0	4.19e-08	1.39667e-08
AAEL005526-RF	0.672037	2.75e-09	0.0510761	0.241038
AAEL005527-RA	7.49759	7.33831	9.19264	8.00951
AAEL005528-RA	2.81195	1.66006	11.6498	5.37394
AAEL005528-RB	6.41805	3.39739	3.09738	4.30427
AAEL005530-RA	0.121241	0.0560191	0.303871	0.160377
AAEL005531-RA	1.85424	1.18733	1.69209	1.57789
AAEL005533-RB	3.76881	3.39996	13.1942	6.78766
AAEL005552-RC	3.88586	9.56e-10	2.01e-09	1.29529
AAEL005552-RD	9.95717	12.627	14.9746	12.5196
AAEL005602-RB	0.0499594	0.143047	0.559667	0.250891
AAEL005606-RB	0.219684	0.118141	0.276089	0.204638
AAEL005606-RC	0	9.75166	0.895129	3.54893
AAEL005615-RB	15.8912	8.29667	15.6569	13.2816
AAEL005626-RB	2.01057	2.32298	3.37885	2.5708
AAEL005628-RB	75.3068	76.0608	52.9324	68.1
AAEL005629-RA	2815.65	3265.49	2650.72	2910.62
AAEL005630-RA	0	0	0.0209137	0.00697123
AAEL005631-RB	2.61595	3.07155	3.61246	3.09999
AAEL005633-RA	0.0051241	0.02659	0.0791989	0.036971
AAEL005634-RB	0.0447217	0	0.715218	0.253313
AAEL005634-RC	0	0.042568	0.834526	0.292365
AAEL005634-RD	0	0	0.914153	0.304718
AAEL005634-RE	0	0	5.12e-09	1.70667e-09
AAEL005634-RF	0	0	0.465993	0.155331
AAEL005634-RG	0	0	0.474151	0.15805
AAEL005634-RH	0	0	0.804401	0.268134
AAEL005635-RA	24.877	27.1298	24.3544	25.4537
AAEL005635-RB	0.996267	2.8644	1.37975	1.74681
AAEL005638-RA	102.766	89.5233	86.6853	92.9915
AAEL005639-RA	17.2919	18.3218	19.3248	18.3128
AAEL005714-RB	0	0	0.0334236	0.0111412
AAEL005714-RC	0	0	0	0
AAEL005714-RD	0	0	0	0
AAEL005714-RE	0	0	0	0
AAEL005714-RF	0	0	0	0
AAEL005717-RA	1.04954	1.24015	2.15253	1.48074
AAEL005719-RA	6.20217	9.36579	7.33064	7.63287
AAEL005722-RB	3873.41	3526.19	2940.79	3446.8
AAEL005726-RB	0.13666	0.11488	0.226004	0.159181
AAEL005726-RC	0	0	0	0
AAEL005726-RD	3.20797	0.720129	3.22149	2.3832
AAEL005726-RE	1.90841	0.823126	3.36588	2.03247
AAEL005726-RF	0.044311	0.28417	0.0626212	0.130367
AAEL005726-RG	0	1.5e-08	3.18e-07	1.11e-07
AAEL005726-RH	0.271766	0	2.05e-08	0.0905887
AAEL005768-RA	0.742466	0.734937	0.508005	0.661803
AAEL005770-RA	1.14016	0.985736	2.01226	1.37939
AAEL005772-RA	1.8574	1.12179	2.09675	1.69198
AAEL005773-RB	0.0947378	0.0737836	0.0281457	0.0655557
AAEL005774-RB	0.00843305	0	0.0457904	0.0180745
AAEL005774-RC	0	0	0.430491	0.143497
AAEL005774-RD	0.0591556	0.0281066	8.90547	2.99758
AAEL005774-RE	0	0	0	0
AAEL005777-RA	0.216761	0.0501858	6.48938	2.25211
AAEL005777-RB	0	0	0	0
AAEL005777-RC	0	0	0.191789	0.0639297
AAEL005777-RD	0	0	0.387325	0.129108
AAEL005787-RA	0.0443587	0.0768802	0.193055	0.104765
AAEL005789-RA	2.53634	0.778133	1.20106	1.50518
AAEL005790-RA	21.6848	24.6398	22.4548	22.9265
AAEL005790-RB	0	0	3.88542	1.29514
AAEL005790-RC	0	0	2.25112	0.750373
AAEL005791-RB	0.0479989	0.0355699	1.98164	0.688403
AAEL005792-RA	0.279525	0.0528276	0.241382	0.191245
AAEL005793-RA	0.181521	7.3e-07	0	0.0605072
AAEL005793-RB	0	0.365761	0.244942	0.203568
AAEL005796-RA	5.21085	3.49877	5.00788	4.5725
AAEL005796-RB	26.6006	27.7454	33.0853	29.1438
AAEL005798-RA	116.479	96.396	106.962	106.612
AAEL005799-RA	0.025827	1.27e-06	1.98e-06	0.00861008
AAEL005799-RB	11.0828	13.0905	10.3848	11.5194
AAEL005802-RA	7.36716	5.75224	9.92139	7.68026
AAEL005803-RB	0.40836	0.478685	0.383719	0.423588
AAEL005803-RC	0.150498	0	0.0895456	0.0800145
AAEL005808-RA	27.6778	15.2127	29.8216	24.2374
AAEL005811-RA	7.35866	5.59469	11.5135	8.15562
AAEL005813-RB	1.72306	1.85696	7.92554	3.83519
AAEL005816-RA	17.5296	10.9076	14.2482	14.2285
AAEL005817-RA	3153.5	3273.29	2651.05	3025.95
AAEL005819-RA	32.159	27.3777	29.2016	29.5794
AAEL005822-RA	79.4697	49.1722	45.5383	58.0601
AAEL005825-RA	7.4986	7.50322	10.7271	8.57631
AAEL005826-RA	8.00124	8.94883	12.2635	9.73786
AAEL005827-RB	0.333671	0.206501	3.43995	1.32671
AAEL005829-RA	0.0800463	0	0.0158391	0.0319618
AAEL005830-RA	31.0732	40.7953	41.1504	37.673
AAEL005831-RB	6.50731	6.43516	7.05644	6.6663
AAEL005832-RA	20.9536	13.5371	15.5069	16.6659
AAEL005832-RB	28.8257	10.7122	34.9623	24.8334
AAEL005834-RA	0	0	0	0
AAEL005837-RA	1.83433	1.37281	3.29476	2.1673
AAEL005837-RB	0.0374858	0	0.151588	0.0630246
AAEL005838-RB	0.659575	0.686124	2.81753	1.38774
AAEL005839-RA	3.8216	1.48698	9.22173	4.84344
AAEL005839-RB	0.136608	0	0.372173	0.169594
AAEL005840-RB	0.0490138	0.0254077	0.0583262	0.0442492
AAEL005840-RC	0.73944	0.926876	0.38827	0.684862
AAEL005943-RB	0.995118	0.763547	3.48311	1.74726
AAEL005944-RA	43.4792	59.463	34.7986	45.9136
AAEL005945-RB	0.140815	0.10004	0.114505	0.118453
AAEL005946-RA	106.691	128.556	131.444	122.23
AAEL005947-RA	27.7906	25.1474	24.536	25.8247
AAEL005947-RB	13.6292	11.2247	12.0947	12.3162
AAEL005950-RAA	0	0	0	0
AAEL005950-RAB	0	0	0.369731	0.123244
AAEL005950-RAC	0	0	0	0
AAEL005950-RD	0	0	0	0
AAEL005950-RE	0	0	0	0
AAEL005950-RF	0	0.188959	0	0.0629863
AAEL005950-RG	0	0	2.18e-10	7.26667e-11
AAEL005950-RH	0	0	0	0
AAEL005950-RI	0	0	0	0
AAEL005950-RJ	0	0	0	0
AAEL005950-RK	0	0.215933	0	0.0719777
AAEL005950-RL	0	0	0	0
AAEL005950-RM	0	0	0	0
AAEL005950-RN	0.823236	0.117484	0.320261	0.420327
AAEL005950-RO	7.82979	3.63089	4.25385	5.23818
AAEL005950-RP	0	0	0	0
AAEL005950-RQ	0	0	0	0
AAEL005950-RR	3.34131	1.64304	5.57291	3.51909
AAEL005950-RS	0	0	0	0
AAEL005950-RT	0.0636295	0	0.782752	0.282127
AAEL005950-RU	0	0	0	0
AAEL005950-RV	0	0	0.127448	0.0424827
AAEL005950-RW	0	0	0.414021	0.138007
AAEL005950-RX	0	0	0	0
AAEL005950-RY	0	0.000121348	0.35899	0.119704
AAEL005950-RZ	0.560828	0	0	0.186943
AAEL005951-RC	0.803112	0	0	0.267704
AAEL005951-RD	23.4955	4.91568	22.3912	16.9341
AAEL005952-RB	0	0	0	0
AAEL005952-RC	0.0763251	0.00609425	0	0.0274731
AAEL005952-RD	0	0	0	0
AAEL005952-RE	0	0	0	0
AAEL005952-RF	1.12e-08	3.55e-10	0.179008	0.0596693
AAEL005992-RB	10.5007	3.00304	10.3457	7.94981
AAEL006063-RA	0.741691	0.736242	0.837248	0.771727
AAEL006064-RA	0.0179712	0	0	0.0059904
AAEL006065-RA	29.8608	34.1756	23.3163	29.1176
AAEL006065-RB	0	0	0	0
AAEL006066-RA	20.8908	16.83	24.6871	20.8026
AAEL006067-RA	3.91399	4.01792	5.46049	4.46413
AAEL006069-RB	28.566	18.8907	23.9223	23.793
AAEL006070-RA	90.446	90.8872	88.3126	89.8819
AAEL006071-RB	0	0	1.2e-09	4e-10
AAEL006071-RC	0	0	0.0596877	0.0198959
AAEL006071-RD	1.45e-10	0	0	4.83333e-11
AAEL006071-RE	0.0345203	0.0152347	8.31e-05	0.0166127
AAEL006071-RF	0.0605114	0.0275908	0.761633	0.283245
AAEL006071-RG	0.0734365	0	9.01e-11	0.0244788
AAEL006071-RH	8.33e-11	0	0.3812	0.127067
AAEL006071-RI	0.572899	0.297673	0.00150346	0.290692
AAEL006071-RJ	1.00563	0.539881	0.00268484	0.516065
AAEL006071-RK	0	0	0.815411	0.271804
AAEL006073-RA	0.342053	0.194042	2.92411	1.1534
AAEL006075-RA	3.51062	2.8688	4.94361	3.77434
AAEL006077-RA	0	0	0	0
AAEL006077-RB	0.0236685	0.00819266	0.00937561	0.0137456
AAEL006080-RA	1.05811	1.73165	3.26864	2.01947
AAEL006087-RA	13.6422	13.1728	15.9804	14.2651
AAEL006113-RA	59.1366	136.827	31.7005	75.888
AAEL006113-RB	0	0.262077	2.46e-09	0.087359
AAEL006113-RC	0	0	0	0
AAEL006113-RD	0.15382	0.23369	0.334173	0.240561
AAEL006113-RE	0.426462	0	0	0.142154
AAEL006113-RF	1.29893	0.199003	0.529816	0.675916
AAEL006113-RG	0.400379	0	1.84132	0.747233
AAEL006113-RH	3.54823	4.35807	2.39091	3.4324
AAEL006113-RI	12.5804	11.0653	3.99006	9.21192
AAEL006113-RJ	0	0	0	0
AAEL006114-RB	0	0	0	0
AAEL006116-RB	2.05108	1.06479	2.21735	1.77774
AAEL006118-RA	9.05217	9.75538	9.26562	9.35772
AAEL006120-RB	0	0	0.197423	0.0658077
AAEL006120-RC	0.0525226	0	0.568122	0.206882
AAEL006120-RD	0	0	0	0
AAEL006120-RE	0	0	0	0
AAEL006120-RF	0.178167	0.161227	0.196115	0.178503
AAEL006157-RB	0	0.0101249	0.0231576	0.0110942
AAEL006158-RA	96.6866	61.6413	106.048	88.1253
AAEL006159-RA	0.196851	0.206212	0.116178	0.17308
AAEL006160-RB	0	0	0	0
AAEL006160-RC	0	0	0	0
AAEL006160-RD	0	0	0.00769673	0.00256558
AAEL006161-RB	1.82279	0.491269	0.711878	1.00865
AAEL006164-RA	0.343959	0.0906848	1.10928	0.514641
AAEL006166-RA	3.99998	4.79035	5.33265	4.70766
AAEL006167-RB	0	0	0	0
AAEL006168-RA	0.795643	0.106196	0.459637	0.453825
AAEL006169-RA	60.9244	38.429	67.0076	55.4537
AAEL006189-RA	7.37132	2.9169	10.7507	7.01297
AAEL006191-RB	0	0.0546527	0.741645	0.265433
AAEL006191-RC	0.127949	0	4.25e-08	0.0426497
AAEL006191-RD	0	0	0	0
AAEL006191-RE	0	0.106671	2.32844	0.811704
AAEL006191-RF	0	0	0.00552709	0.00184236
AAEL006193-RA	7.25166	9.68711	8.29891	8.41256
AAEL006193-RB	0	0	0.644936	0.214979
AAEL006193-RC	0	0.114428	0	0.0381427
AAEL006196-RA	58.4196	41.8393	38.7075	46.3221
AAEL006196-RB	2.60384	1.79555	1.44398	1.94779
AAEL006196-RC	0	0	0.364063	0.121354
AAEL006196-RD	0.384503	0.246142	0.458689	0.363111
AAEL006197-RA	0.111079	0.439603	1.07973	0.543471
AAEL006202-RA	0	0	0	0
AAEL006208-RA	0.0659891	0.130163	5.10623	1.76746
AAEL006209-RA	0.0369319	0.556242	4.32201	1.63839
AAEL006287-RA	0.0485943	0.0773941	0.0669443	0.0643109
AAEL006293-RA	0	0	0	0
AAEL006293-RB	0	0	0	0
AAEL006293-RC	0	0	0	0
AAEL006293-RD	0.0186904	0.235232	0.414117	0.22268
AAEL006294-RA	4.03007	4.25604	5.13454	4.47355
AAEL006294-RB	0.134175	0.756887	0.263921	0.384994
AAEL006294-RC	0	0.330485	0.512067	0.280851
AAEL006362-RA	14.8034	16.637	17.2882	16.2429
AAEL006362-RB	0.181802	0.135454	0.131599	0.149618
AAEL006362-RC	0.86289	0.207813	0	0.356901
AAEL006362-RD	0.967654	1.49167	1.36324	1.27419
AAEL006363-RC	0	0.232043	0	0.0773477
AAEL006363-RD	0	0	0	0
AAEL006363-RE	5.80368	2.77956	7.12086	5.2347
AAEL006363-RF	1.68959	0.562152	3.52691	1.92622
AAEL006363-RG	13.7292	12.4131	10.9678	12.37
AAEL006363-RH	0.31981	0	0	0.106603
AAEL006364-RA	38.171	32.7152	62.7623	44.5495
AAEL006364-RB	0.000501721	1.84894	0.0234216	0.624288
AAEL006364-RC	8.61848	6.92771	10.8309	8.79236
AAEL006364-RD	6.49832	1.37572	5.54252	4.47219
AAEL006364-RE	6.19264	5.59354	9.27609	7.02076
AAEL006365-RA	0	0	0.0698558	0.0232853
AAEL006367-RA	5.2991	4.34719	9.06446	6.23692
AAEL006368-RA	0	0	0.0671687	0.0223896
AAEL006370-RB	0.552405	1.5087	1.12584	1.06231
AAEL006370-RC	1.36382	7.15e-08	2.86357	1.40913
AAEL006372-RA	105.364	25.5356	165.89	98.9299
AAEL006372-RB	7.98598	3.92908	6.81547	6.24351
AAEL006372-RC	23.6674	9.6949	2.67783	12.0134
AAEL006373-RB	10.3941	9.41313	9.58776	9.79833
AAEL006374-RA	2.39381	2.67981	5.0669	3.38017
AAEL006376-RA	1.11307	0.424536	1.67202	1.06988
AAEL006377-RA	6.41075	2.34991	2.87013	3.87693
AAEL006378-RA	0	0	0	0
AAEL006381-RA	1331.73	2982.36	857.304	1723.8
AAEL006382-RA	0	0	0.467931	0.155977
AAEL006382-RB	0.0902058	0.188196	1.13e-07	0.0928006
AAEL006383-RA	0	0.0403987	0.0460312	0.02881
AAEL006384-RA	1.78032	0.825086	2.97827	1.86123
AAEL006589-RA	0.647601	0.245616	4.65688	1.85003
AAEL006589-RB	1.2466	0.357505	0.190343	0.598149
AAEL006589-RC	0.401685	0.0847497	1.15949	0.548642
AAEL006589-RD	1.30138	0.525034	2.55904	1.46182
AAEL006593-RB	1.8e-06	5.06e-07	8.73e-07	1.05967e-06
AAEL006593-RC	0.281243	0.160196	0.194023	0.211821
AAEL006597-RA	0	0	0	0
AAEL006707-RA	4.45038	0.928789	5.13098	3.50338
AAEL006708-RA	7.90318	5.8125	3.05742	5.59103
AAEL006711-RA	0.570478	0.267075	0.729474	0.522342
AAEL006711-RB	0	0	0	0
AAEL006711-RC	0.15398	0.140736	0.315834	0.203517
AAEL006711-RD	0	0	0	0
AAEL006711-RE	0.399996	0.0204226	1.01584	0.478753
AAEL006711-RF	0.217528	0.123837	1.18742	0.509595
AAEL006711-RG	0.295426	0	0.333659	0.209695
AAEL006711-RH	0.514115	0	1.25098	0.588365
AAEL006711-RI	0.0861722	0	0.213847	0.100006
AAEL006711-RJ	6.44195	1.97272	8.34836	5.58768
AAEL006712-RA	0.412321	0.5366	9.09369	3.34754
AAEL006713-RA	16.2146	17.9677	19.1583	17.7802
AAEL006715-RA	0.669122	0.383103	5.91203	2.32142
AAEL006817-RA	0	0	0	0
AAEL006818-RB	0.789711	0.0434539	0.147313	0.326826
AAEL006819-RA	9.23787	11.9467	11.2592	10.8146
AAEL006820-RA	134.994	135.052	181.682	150.576
AAEL006822-RA	0.144802	0.174934	0.0820674	0.133934
AAEL006822-RB	0	0	0	0
AAEL006822-RC	0.341997	0.109014	0.529621	0.326877
AAEL006822-RD	0.0537867	0.0207906	2.52e-08	0.0248591
AAEL006822-RE	0.14829	0.23811	0.492283	0.292894
AAEL006822-RF	0	0	0	0
AAEL006822-RG	0.35727	0	0	0.11909
AAEL006822-RH	0.0130873	0.0137377	0.00689668	0.0112406
AAEL006822-RI	0.189192	0.232161	0.108097	0.176483
AAEL006822-RJ	0.038067	0.0425326	0.0207194	0.033773
AAEL006822-RK	0.034563	0	0	0.011521
AAEL006822-RL	0.54147	0	0	0.18049
AAEL006823-RA	47.5811	124.081	60.0869	77.2497
AAEL006824-RA	23.8297	8.32345	10.1071	14.0868
AAEL006825-RB	0.108511	0.0422455	0.0241828	0.0583131
AAEL006826-RB	2.04e-07	0	2.58e-07	1.54e-07
AAEL006826-RC	0.0239102	0	0.042591	0.0221671
AAEL006826-RD	0	0	0	0
AAEL006827-RA	0.150017	0	2.06851	0.739509
AAEL006827-RB	0.097672	0.0858865	0.573215	0.252258
AAEL006829-RA	53.0465	30.7641	55.5123	46.441
AAEL006830-RA	0.0773222	0.0535835	35.713	11.948
AAEL006832-RB	0.557369	0.450153	0.588777	0.5321
AAEL006859-RA	33.9781	27.011	50.4331	37.1407
AAEL006860-RA	4152.34	4954.87	4698.84	4602.02
AAEL006936-RC	1.04618	0.574788	0.926134	0.849034
AAEL006936-RD	0	0	0	0
AAEL006936-RE	0	0	0	0
AAEL006936-RF	0	0	0	0
AAEL006936-RG	1.52e-08	2.81e-09	7.98e-09	8.66333e-09
AAEL006936-RH	0.106319	0.0999362	0.427926	0.211394
AAEL006937-RA	3.74848	3.23806	5.74515	4.2439
AAEL006938-RA	3.49217	5.79168	4.89772	4.72719
AAEL006944-RB	0	0	0.634889	0.21163
AAEL006944-RC	0	0	0.120937	0.0403123
AAEL006947-RA	0.403655	0.157204	0.389713	0.316857
AAEL006948-RB	0	0	0	0
AAEL006948-RC	0.868461	0.418164	0.370768	0.552464
AAEL006948-RD	2.92e-07	0.00115063	0.163652	0.0549343
AAEL006948-RE	1.1609	0.0307415	0.49902	0.563554
AAEL006948-RF	6.62e-07	0.000115991	0.255811	0.0853092
AAEL006948-RG	0	0	0	0
AAEL006948-RH	2.18016	1.39022	4.39181	2.65406
AAEL006948-RI	0.838271	0	0	0.279424
AAEL006948-RJ	0.666448	0.23097	0.251454	0.382957
AAEL006949-RA	1.02033	0.623685	1.89774	1.18058
AAEL006949-RB	3.30853	1.52618	6.37826	3.73766
AAEL006949-RC	1.42171	3.71106	0	1.71092
AAEL006950-RA	2.16327	1.3152	3.47937	2.31928
AAEL006951-RA	7.36748	7.63309	5.4659	6.82216
AAEL006951-RB	8.47571	5.81375	8.66279	7.65075
AAEL006951-RC	10.4811	9.49644	13.5234	11.167
AAEL006955-RB	0.010263	0	0.118686	0.042983
AAEL006955-RC	0.00570313	0	0	0.00190104
AAEL006956-RA	2.91239	3.44621	9.09695	5.15185
AAEL006956-RB	19.7499	14.4824	15.1417	16.458
AAEL006957-RB	0.0566122	0.0587547	0.250875	0.122081
AAEL006958-RB	0.524238	0.17414	1.27241	0.656929
AAEL006958-RC	1.17809	0.773786	1.66778	1.20655
AAEL006958-RD	0	0.230256	0.350295	0.193517
AAEL006958-RE	0	0	2.3e-06	7.66667e-07
AAEL007029-RA	37.0987	14.1447	33.3864	28.2099
AAEL007029-RB	0	0	0	0
AAEL007029-RC	0	0	0.0697447	0.0232482
AAEL007029-RD	0	0	0	0
AAEL007029-RE	0	0	0	0
AAEL007029-RF	0	0	0	0
AAEL007029-RG	0.187582	0.0528911	0.228081	0.156185
AAEL007029-RH	0	0	0	0
AAEL007029-RI	0.277686	0.0224065	0	0.100031
AAEL007029-RJ	0.358462	0.0542819	0.51367	0.308805
AAEL007029-RK	0	0	0	0
AAEL007029-RL	0.156898	0.150088	0.514066	0.273684
AAEL007029-RM	1.08307	1.01597	1.54266	1.2139
AAEL007029-RN	0	0.0356733	0.126638	0.0541038
AAEL007029-RO	4.34e-05	6.88e-10	0	1.44669e-05
AAEL007030-RA	47.1659	100.357	20.5558	56.0262
AAEL007030-RB	102.956	255.732	66.3416	141.677
AAEL007030-RC	0.116942	0.433284	1.51321	0.687812
AAEL007030-RD	2.20512	3.52976	1.50549	2.41346
AAEL007034-RA	2.66038	1.01562	3.43703	2.37101
AAEL007038-RB	2.43564	2.50994	3.56479	2.83679
AAEL007039-RB	4.78022	2.17223	4.0589	3.67045
AAEL007040-RA	0	0.00986639	0	0.0032888
AAEL007040-RB	0	0	0	0
AAEL007040-RC	0	0	0.0996654	0.0332218
AAEL007078-RA	97.5212	94.3239	85.8661	92.5704
AAEL007198-RA	0.468505	0.057305	0.0490752	0.191628
AAEL007202-RA	4.15437	4.76193	5.76755	4.89462
AAEL007203-RA	7.29102	11.9414	7.54164	8.92469
AAEL007205-RB	0.0870589	0.0112949	0	0.0327846
AAEL007205-RC	0	0	0.0239152	0.00797173
AAEL007209-RA	8.76044	4.18123	9.44263	7.46143
AAEL007211-RA	1.25158	0.564455	3.53385	1.7833
AAEL007217-RA	0.468172	0.462154	0.321168	0.417165
AAEL007248-RB	1.27231	1.64673	5.13741	2.68548
AAEL007268-RB	0.0496008	0.119966	0.17695	0.115506
AAEL007268-RC	0.00857934	2.54e-10	0.117469	0.0420161
AAEL007268-RD	6.81e-05	0	0.00080307	0.00029039
AAEL007343-RA	8.07047	6.20731	9.33381	7.87053
AAEL007383-RE	152.993	202.135	221.163	192.097
AAEL007383-RF	120.061	149.332	118.771	129.388
AAEL007383-RG	655.902	786.874	406.964	616.58
AAEL007385-RC	1.91741	5.33347	3.22927	3.49338
AAEL007385-RD	13.9848	17.6905	15.9922	15.8892
AAEL007385-RE	155.227	275.335	141.087	190.55
AAEL007385-RF	472.636	511.598	482.854	489.029
AAEL007386-RA	0.0126305	0.0393856	0.0449919	0.032336
AAEL007387-RB	1.46395	1.57899	4.15625	2.39973
AAEL007387-RC	1.25382	1.87479	2.19445	1.77435
AAEL007388-RB	0.0750936	0	0	0.0250312
AAEL007388-RC	0	0	0.0554118	0.0184706
AAEL007388-RD	0	0.0768441	1.82e-06	0.0256153
AAEL007389-RA	0.0199334	0	0.0236387	0.014524
AAEL007455-RB	0.0380265	0.0791551	0.112756	0.0766459
AAEL007456-RB	0.736286	0.745742	2.85546	1.44583
AAEL007458-RB	0	0.0391954	2.17908	0.739425
AAEL007461-RB	1.0534	0.754202	2.44551	1.4177
AAEL007464-RA	0.476103	0.614451	2.75569	1.28208
AAEL007465-RB	3.98e-06	8.64e-07	1.51e-09	1.61517e-06
AAEL007465-RC	0	0	0	0
AAEL007465-RD	0.244756	0.10036	0.35888	0.234665
AAEL007468-RA	3.10139	3.01126	6.18648	4.09971
AAEL007469-RA	8.87701	15.9113	19.9974	14.9286
AAEL007476-RB	5.06924	2.791	8.48449	5.44824
AAEL007480-RA	2.33067	1.89868	3.2152	2.48152
AAEL007481-RA	7.50492	4.26828	7.34171	6.37164
AAEL007482-RA	2.31088	2.84495	7.33118	4.16234
AAEL007483-RB	0.194507	0.0781603	0.0522087	0.108292
AAEL007484-RA	31.0131	40.2132	24.8346	32.0203
AAEL007484-RB	13.6755	25.7318	18.4394	19.2822
AAEL007487-RA	0.366739	0.334084	2.54393	1.08158
AAEL007487-RB	0.0100038	0	0	0.0033346
AAEL007487-RC	0	0	0	0
AAEL007492-RA	5.51153	4.24726	6.01695	5.25858
AAEL007493-RA	0	0	0.0395191	0.013173
AAEL007494-RA	334.626	296.306	279.868	303.6
AAEL007495-RA	0.656739	0.395814	0.744957	0.59917
AAEL007495-RB	0.725298	0.170551	0.649347	0.515065
AAEL007500-RA	0.297467	0.154787	0.132316	0.194857
AAEL007501-RA	24.5059	29.3903	13.8074	22.5679
AAEL007501-RB	25.3319	26.0387	19.8888	23.7531
AAEL007507-RA	0	0	0	0
AAEL007507-RB	0.0447022	0	0	0.0149007
AAEL007508-RA	0.0538148	0.149326	0.0638402	0.0889937
AAEL007509-RA	7.06566	1.35545	5.03441	4.48517
AAEL007509-RB	0	5.83855	3.89895	3.24583
AAEL007511-RB	0.0129439	0.148006	0.0614742	0.0741414
AAEL007512-RA	4.92831	4.81812	4.99772	4.91472
AAEL007514-RA	0	0	0	0
AAEL007514-RB	0	0	0	0
AAEL007518-RB	0	0.27068	0.303664	0.191448
AAEL007518-RC	0.144149	0.0554155	0	0.0665215
AAEL007518-RD	0	0	0	0
AAEL007518-RE	0	0	0.317467	0.105822
AAEL007518-RF	0	0	0	0
AAEL007518-RG	0	0	0	0
AAEL007518-RH	0	0	0	0
AAEL007518-RI	0	0	0	0
AAEL007518-RJ	0.658745	0.50871	9.16e-07	0.389152
AAEL007518-RK	0.000135852	0	2.39e-07	4.53637e-05
AAEL007518-RL	0.0993862	0	0.51732	0.205569
AAEL007518-RM	0.200016	0.335271	1.0664	0.533896
AAEL007518-RN	0	0	0	0
AAEL007519-RA	0	0.0846912	0.0193226	0.0346713
AAEL007579-RA	0	0.0112738	0.00645216	0.00590865
AAEL007579-RB	0	0	0	0
AAEL007579-RC	0	5.23e-05	3.46e-05	2.89667e-05
AAEL007584-RA	0	0.0293607	25.0079	8.34575
AAEL007586-RA	10.0977	5.34275	14.8812	10.1072
AAEL007587-RB	0.639608	0	0.828258	0.489289
AAEL007591-RA	9.90071	13.1667	51.7955	24.9543
AAEL007592-RA	70.6381	68.1767	139.373	92.7293
AAEL007593-RA	0.980874	0.455105	5.39105	2.27568
AAEL007595-RB	11.0209	14.3215	20.5832	15.3085
AAEL007595-RC	0.513021	0.495391	0.547796	0.518736
AAEL007595-RD	9.83019	3.42546	7.4699	6.90852
AAEL007597-RA	1.46508	1.06297	3.3216	1.94988
AAEL007597-RB	1.20214	0.938811	1.80997	1.31697
AAEL007598-RA	0.0255673	0	0	0.00852243
AAEL007607-RA	0.146795	0.0789843	0.113561	0.113113
AAEL007615-RA	0	0	0.0298842	0.0099614
AAEL007619-RB	0.301963	0.156531	0.695088	0.384527
AAEL007619-RC	1.40316	0.40084	0.550567	0.784856
AAEL007641-RB	0	0	0.0104799	0.0034933
AAEL007642-RA	0.809573	1.80512	3.99703	2.20391
AAEL007642-RB	0.7383	0.0008722	0	0.246391
AAEL007644-RA	1.9403	0.62542	4.92886	2.49819
AAEL007646-RB	0	0	0	0
AAEL007646-RC	0.0256867	0.0133154	0.0215453	0.0201825
AAEL007646-RD	0	0	0	0
AAEL007646-RE	0.0233008	0.0666084	0	0.0299697
AAEL007646-RF	0	0	0	0
AAEL007647-RA	20.0272	22.7948	23.8527	22.2249
AAEL007648-RA	0.0110597	0	0	0.00368657
AAEL007650-RA	65.7656	59.5802	64.6475	63.3311
AAEL007651-RA	3.28733	2.15061	3.09981	2.84592
AAEL007651-RB	4.67894	1.43545	4.34184	3.48541
AAEL007651-RC	0.502802	0.347476	1.72829	0.859523
AAEL007651-RD	0.439431	0.675598	1.57251	0.895846
AAEL007652-RA	0.387163	0.624624	1.12498	0.712256
AAEL007653-RA	2.10002	0.237389	3.44965	1.92902
AAEL007654-RA	0.561061	0.729188	2.49763	1.26263
AAEL007655-RA	19.5542	21.7813	11.5342	17.6232
AAEL007656-RA	23.6144	23.3815	19.0269	22.0076
AAEL007657-RA	0.00783658	0.0203278	31.3403	10.4562
AAEL007658-RB	0.672706	0.542668	1.30126	0.838878
AAEL007658-RC	0	1.46e-06	0.0471811	0.0157275
AAEL007658-RD	0	0.019128	0	0.006376
AAEL007658-RE	2.02e-09	0.157188	0.866461	0.341216
AAEL007658-RF	5.66e-05	2.65e-05	8.23e-05	5.51333e-05
AAEL007658-RG	1.9759	0.973966	1.49867	1.48285
AAEL007658-RH	7.56e-11	0	0	2.52e-11
AAEL007658-RI	6.26161	3.00339	2.25486	3.83995
AAEL007658-RJ	0.825619	0.674008	1.60707	1.03557
AAEL007658-RK	6.78e-08	0.243085	0	0.0810284
AAEL007658-RL	0.148203	0.630008	0	0.259404
AAEL007658-RM	0.13926	0	0.476779	0.205346
AAEL007658-RN	0.0308471	0	0.536873	0.18924
AAEL007658-RO	0.218924	0	0.253743	0.157556
AAEL007658-RP	0	0.290617	0	0.0968723
AAEL007658-RQ	0.458085	0	0.188616	0.215567
AAEL007658-RR	0	0	0	0
AAEL007658-RS	7.36e-05	0	0.0788087	0.0262941
AAEL007658-RT	0.345074	0.385036	0.905249	0.54512
AAEL007658-RU	0.562093	0.160611	4.03e-07	0.240901
AAEL007659-RA	0.620457	0.606928	3.55389	1.59376
AAEL007660-RA	17.9118	15.2664	17.635	16.9377
AAEL007661-RA	0.0617235	0.0641541	2.06299	0.729623
AAEL007661-RB	1.2e-06	6.48e-07	0.13458	0.0448606
AAEL007662-RD	2.56133	0.399322	0.25483	1.07183
AAEL007662-RE	1e-10	1.87025	1.5542	1.14148
AAEL007662-RF	8.16583	6.13141	0.933313	5.07685
AAEL007662-RG	1.55251	0.523835	1.08889	1.05508
AAEL007662-RH	2.25789	1.14258	3.25359	2.21802
AAEL007662-RI	3.04548	0.895168	1.35902	1.76656
AAEL007662-RJ	6.12747	5.58381	9.97941	7.23023
AAEL007662-RK	0.847844	0.227893	0.353621	0.476453
AAEL007662-RL	3.63079	2.45843	4.51162	3.53361
AAEL007662-RM	1.61343	1.19692	2.58714	1.79916
AAEL007664-RB	0.0139332	0.0144482	0.287112	0.105164
AAEL007667-RA	0.416687	0.0376349	3.20723	1.22052
AAEL007668-RA	32.0304	41.2459	33.4389	35.5717
AAEL007741-RA	0.301416	0.399954	0.64906	0.450143
AAEL007744-RA	1.89202	1.03184	1.89509	1.60632
AAEL007750-RA	4.17826	2.00447	4.65708	3.61327
AAEL007752-RA	506.789	503.097	454.077	487.988
AAEL007754-RB	5.78648	2.04893	4.52324	4.11955
AAEL007757-RA	0.28533	0.296832	1.13515	0.572437
AAEL007758-RA	28.794	15.4938	30.1528	24.8135
AAEL007760-RA	20.7155	22.6849	17.9657	20.4554
AAEL007762-RA	16.1177	28.1038	20.9212	21.7142
AAEL007788-RB	5.00428	4.53478	5.35757	4.96554
AAEL007789-RA	0.226284	0.193726	0.0474096	0.155807
AAEL007790-RA	11.2111	11.6821	15.2214	12.7049
AAEL007792-RB	29.7748	15.5494	31.6846	25.6696
AAEL007793-RA	0.0409053	0.148741	0.194363	0.128003
AAEL007820-RC	18.1679	18.4344	26.8323	21.1449
AAEL007822-RB	21.829	18.0558	23.2429	21.0426
AAEL007824-RA	4334.06	4355.19	3687.77	4125.67
AAEL007825-RB	7.22738	6.79197	10.5157	8.17835
AAEL007830-RA	1.70956	0.0155529	0	0.575038
AAEL007830-RB	2.30741	0.109289	0.124734	0.847144
AAEL007831-RA	0	0	0	0
AAEL007832-RB	0.184714	0.0466764	0.0980514	0.109814
AAEL007835-RA	0.715309	0.984058	4.9724	2.22392
AAEL007838-RB	0	0	0.350956	0.116985
AAEL007838-RC	0	0	0	0
AAEL007838-RD	2.87978	1.6489	4.12555	2.88474
AAEL007839-RB	4.61172	5.21863	10.8605	6.89695
AAEL007872-RB	0.0801465	1.02465	2.54329	1.21603
AAEL007892-RA	120.736	152.378	85.1207	119.412
AAEL007904-RA	5.97189	5.60697	7.57813	6.38566
AAEL007915-RB	0	0	0	0
AAEL007915-RC	17.9853	18.4752	29.8287	22.0964
AAEL007915-RD	0.60562	0	0	0.201873
AAEL007915-RE	1.55028	0.574816	2.11653	1.41388
AAEL007915-RF	0	0	0	0
AAEL007915-RG	0.000311261	0.00179344	0	0.000701567
AAEL007915-RH	0.00550993	2.42525	0	0.810253
AAEL007915-RI	3.79249	5.9118	8.02956	5.91128
AAEL007915-RJ	21.5031	11.4749	1.14971	11.3759
AAEL007915-RK	0	0	0	0
AAEL007915-RL	1.35e-09	3.77e-09	0	1.70667e-09
AAEL007915-RM	0	0.455294	0.3995	0.284931
AAEL007992-RA	0.849393	0.646316	1.43207	0.975926
AAEL007992-RB	4.40205	4.56385	5.29687	4.75426
AAEL007993-RA	18.2055	25.1811	16.4141	19.9336
AAEL008003-RA	0.0154784	0	0.0183697	0.0112827
AAEL008010-RB	0	0	0.0190797	0.0063599
AAEL008010-RC	0	0	0.0102316	0.00341053
AAEL008012-RB	0	0	0.0989042	0.0329681
AAEL008013-RA	0	0	0	0
AAEL008013-RB	0	0	0	0
AAEL008013-RC	0.0368102	0	0.130562	0.0557907
AAEL008014-RA	0.0653681	0.135903	0.0155223	0.0722645
AAEL008015-RA	7.21908	2.59747	9.70353	6.50669
AAEL008017-RA	0.429571	0.372556	0.460476	0.420868
AAEL008018-RA	0.0537922	0	0.0798289	0.0445404
AAEL008020-RA	4.71481	5.66516	3.36416	4.58138
AAEL008021-RA	5.41156	3.05175	5.26202	4.57511
AAEL008021-RB	0	0	0.687815	0.229272
AAEL008021-RC	0.362999	0	0	0.121
AAEL008022-RA	0.418022	2.50505	0.94862	1.29056
AAEL008024-RA	17.9528	7.63077	8.53828	11.374
AAEL008024-RB	2.45373	2.27895	3.7086	2.81376
AAEL008024-RC	0.343053	0	0.782823	0.375292
AAEL008024-RD	21.5904	12.0335	16.2706	16.6315
AAEL008025-RA	44.8946	33.8343	41.7713	40.1667
AAEL008027-RB	0.14492	0.289922	0	0.144947
AAEL008027-RC	0.300331	0.541705	0.246621	0.362886
AAEL008027-RD	1.82406	0.597477	3.66216	2.0279
AAEL008028-RA	63.2443	72.6467	43.7736	59.8882
AAEL008028-RB	0.362988	0.257213	0.12355	0.247917
AAEL008028-RC	0.818298	0.318065	0.185937	0.440767
AAEL008029-RA	0	0	0.35185	0.117283
AAEL008029-RB	0	0	0	0
AAEL008029-RC	0	0.185235	1.69568	0.626972
AAEL008029-RD	0	0	0.834571	0.27819
AAEL008031-RB	0.00187804	0.00740847	0.00434905	0.00454519
AAEL008031-RC	0	0	0	0
AAEL008031-RD	0.00589723	0.0248873	0.0141311	0.0149719
AAEL008032-RA	0.109955	0.0152223	0.0435598	0.0562457
AAEL008032-RB	0	0	0	0
AAEL008071-RB	0.708535	0.633173	2.67e-09	0.447236
[truncated: 32,478 more rows]

## Sheet: SailfishY7
Name	M7Y1	M7Y2	Y7 Average
AAEL000016-RA	18.9766	27.1081	23.0423
AAEL000024-RA	0	0	0
AAEL000024-RB	0	0	0
AAEL000024-RC	0.230624	0.807019	0.518822
AAEL000029-RB	0	0.0383476	0.0191738
AAEL000064-RA	0.0999561	3.35153	1.72574
AAEL000079-RB	0.0256564	2.65822	1.34194
AAEL000079-RC	0.0168025	4.59101	2.30391
AAEL000079-RD	0	2.11364	1.05682
AAEL000084-RA	28.1984	43.7607	35.9796
AAEL000084-RB	3.39292	0.804876	2.0989
AAEL000101-RA	0.988402	2.65007	1.81924
AAEL000102-RB	27.6254	33.7891	30.7072
AAEL000106-RA	3.60506	5.73937	4.67221
AAEL000107-RA	0.664599	5.88972	3.27716
AAEL000108-RA	0	0.378785	0.189392
AAEL000109-RA	1.39313	0.483354	0.938242
AAEL000111-RA	0.360455	6.18767	3.27406
AAEL000113-RA	0	0	0
AAEL000115-RA	26.9713	30.7232	28.8472
AAEL000116-RB	1.33998	3.62178	2.48088
AAEL000118-RA	6.45781	9.57999	8.0189
AAEL000119-RA	1.05067	1.51856	1.28462
AAEL000122-RA	1.11032	3.57615	2.34323
AAEL000122-RB	0.695703	8.61181	4.65376
AAEL000123-RA	0	0.086452	0.043226
AAEL000127-RA	1.04345	2.1731	1.60827
AAEL000127-RB	0.323403	0.560344	0.441873
AAEL000134-RA	0.139228	0.340596	0.239912
AAEL000137-RB	0	0.852394	0.426197
AAEL000137-RC	0.600793	0	0.300397
AAEL000137-RD	0.000101132	1.80865	0.904376
AAEL000137-RE	0	0	0
AAEL000137-RF	0	0	0
AAEL000138-RA	119.562	102.185	110.874
AAEL000140-RA	1.45333	6.78749	4.12041
AAEL000140-RB	0	0.501605	0.250802
AAEL000143-RA	9.81973	12.2413	11.0305
AAEL000146-RA	7.23507	9.03884	8.13696
AAEL000147-RA	13.586	16.3232	14.9546
AAEL000148-RA	0.435412	3.7937	2.11456
AAEL000149-RA	3.16949	17.607	10.3882
AAEL000154-RA	0.0200793	1.23754	0.62881
AAEL000157-RA	0.717978	8.22696	4.47247
AAEL000219-RA	57.0199	42.1308	49.5754
AAEL000223-RA	74.1066	77.4974	75.802
AAEL000229-RA	0	0.294873	0.147436
AAEL000230-RA	10.3237	12.7474	11.5356
AAEL000231-RA	17.0622	20.2491	18.6557
AAEL000239-RB	0.138562	0.0604153	0.0994886
AAEL000241-RA	9.65232	10.1223	9.88731
AAEL000242-RA	3.41e-06	0	1.705e-06
AAEL000242-RB	0	1.17e-08	5.85e-09
AAEL000242-RC	0	2.45e-08	1.225e-08
AAEL000242-RD	0.261334	0.33252	0.296927
AAEL000242-RE	0	0.0250494	0.0125247
AAEL000242-RF	0	6.7e-09	3.35e-09
AAEL000243-RB	0.0858693	0.086569	0.0862191
AAEL000244-RA	50.0831	43.7754	46.9292
AAEL000247-RA	0	0	0
AAEL000247-RB	0.0569973	0.0221522	0.0395747
AAEL000249-RA	0	0.0427155	0.0213578
AAEL000249-RB	0	0.0399637	0.0199818
AAEL000249-RC	0	0	0
AAEL000249-RD	0	0	0
AAEL000249-RE	0	0	0
AAEL000250-RB	0	0	0
AAEL000250-RC	0	0	0
AAEL000250-RD	0.000109717	2.15e-05	6.56085e-05
AAEL000250-RE	0.071821	0.0167768	0.0442989
AAEL000250-RF	0	0	0
AAEL000251-RA	0.125772	0.0818554	0.103814
AAEL000252-RA	0.0782452	0.387661	0.232953
AAEL000254-RB	0.000528405	0.000131925	0.000330165
AAEL000254-RC	0	0	0
AAEL000254-RD	0.176191	0.0514501	0.113821
AAEL000384-RB	0.0116267	0.0135881	0.0126074
AAEL000609-RA	0.09114	0.106138	0.098639
AAEL000626-RA	0.10745	0.0832018	0.0953259
AAEL000626-RB	52.372	26.6711	39.5215
AAEL000626-RC	0.513448	0	0.256724
AAEL000626-RD	23.4702	19.3082	21.3892
AAEL000980-RA	0.475836	1.33614	0.905988
AAEL000980-RB	0	3.41328	1.70664
AAEL000982-RA	11.9663	12.2019	12.0841
AAEL000983-RA	0.125394	4.53537	2.33038
AAEL000983-RB	0.307367	0	0.153684
AAEL000983-RE	0	0.31284	0.15642
AAEL000983-RF	8.47444	7.531	8.00272
AAEL000983-RG	1.35028	0	0.67514
AAEL000983-RH	0.289621	0.321614	0.305617
AAEL000997-RB	0.0144157	0.027335	0.0208754
AAEL001005-RA	730.186	346.783	538.485
AAEL001008-RA	3.03312	6.52931	4.78121
AAEL001009-RB	0.402449	19.8433	10.1229
AAEL001054-RB	2.1994	0.5335	1.36645
AAEL001059-RA	0.0539401	0.0305214	0.0422307
AAEL001060-RA	0.0111609	0	0.00558045
AAEL001060-RB	0	0	0
AAEL001060-RC	0.0337377	0.0974893	0.0656135
AAEL001061-RA	0	0.234767	0.117384
AAEL001061-RB	21.1692	148.714	84.9416
AAEL001061-RC	3.37641	101.122	52.2492
AAEL001062-RB	8.02201	2.86885	5.44543
AAEL001063-RA	0	0	0
AAEL001065-RA	15.648	14.31	14.979
AAEL001067-RA	0	0.397318	0.198659
AAEL001068-RA	0.0744496	0.288816	0.181633
AAEL001071-RA	2.15181	2.9158	2.53381
AAEL001073-RA	0	0	0
AAEL001074-RB	0	0.448999	0.224499
AAEL001074-RC	0.0158136	0.0431652	0.0294894
AAEL001074-RD	0	5.28e-05	2.64e-05
AAEL001077-RA	0.560898	0.154271	0.357584
AAEL001080-RA	24.6676	14.5227	19.5952
AAEL001082-RA	1.7736	1.21368	1.49364
AAEL001084-RA	0.0458385	0.150118	0.0979783
AAEL001085-RA	22.115	20.3025	21.2087
AAEL001086-RB	1.59628	5.89057	3.74343
AAEL001087-RB	0.346698	2.4016	1.37415
AAEL001088-RB	0.971102	0.162296	0.566699
AAEL001088-RC	0.55377	5.85094	3.20235
AAEL001089-RA	31.3434	20.9801	26.1617
AAEL001090-RA	0.0207104	0.965373	0.493042
AAEL001091-RA	24.0538	14.8137	19.4337
AAEL001092-RA	43.4182	58.7763	51.0973
AAEL001094-RA	8.53552	7.8064	8.17096
AAEL001094-RB	15.4377	6.77432	11.106
AAEL001094-RC	0.000803419	0	0.000401709
AAEL001094-RD	1.38779	0.460033	0.923911
AAEL001095-RA	0.114856	0.368817	0.241837
AAEL001098-RA	0.589237	0.395899	0.492568
AAEL001099-RA	2.98063	9.76538	6.37301
AAEL001099-RB	0	1.49513	0.747565
AAEL001099-RC	0	1.46569	0.732845
AAEL001228-RA	0	0.00505446	0.00252723
AAEL001228-RB	0	0.00181553	0.000907765
AAEL001229-RA	0	0	0
AAEL001231-RB	0	0.0486238	0.0243119
AAEL001231-RC	0	0.0409671	0.0204835
AAEL001231-RD	0	0	0
AAEL001231-RE	0	0	0
AAEL001231-RF	0	0	0
AAEL001231-RG	0	0.166268	0.083134
AAEL001231-RH	0	0	0
AAEL001231-RI	0	0	0
AAEL001231-RJ	0	0	0
AAEL001236-RA	21.8614	22.3901	22.1258
AAEL001290-RA	0	0.218815	0.109408
AAEL001319-RB	0	0.344021	0.172011
AAEL001351-RA	0.658717	7.26391	3.96131
AAEL001427-RA	6.65208	10.0953	8.37369
AAEL001433-RB	0.0705881	1.78678	0.928684
AAEL001433-RC	0.290072	0	0.145036
AAEL001433-RD	0.0855263	0.133769	0.109648
AAEL001439-RA	41.255	35.7218	38.4884
AAEL001442-RB	0.238339	2.0415	1.13992
AAEL001442-RC	3.02e-11	0.0241434	0.0120717
AAEL001442-RD	0	0	0
AAEL001442-RE	5.43e-06	0.0726767	0.0363411
AAEL001442-RF	1.36e-10	1.76187	0.880935
AAEL001442-RG	0	0.365888	0.182944
AAEL001446-RB	0.202188	1.36941	0.785799
AAEL001446-RC	0	0	0
AAEL001446-RD	0.612141	4.48461	2.54838
AAEL001446-RE	0	0	0
AAEL001446-RF	0	0.443906	0.221953
AAEL001446-RG	0	0	0
AAEL001446-RH	1.94958	0.161709	1.05564
AAEL001446-RI	0.42316	2.21553	1.31935
AAEL001447-RA	0.288965	0	0.144483
AAEL001447-RB	0	0	0
AAEL001447-RC	0	0	0
AAEL001447-RD	0	0.617181	0.30859
AAEL001447-RE	0	0.0900893	0.0450446
AAEL001447-RF	0	0.0917549	0.0458775
AAEL001447-RG	0.0382123	0	0.0191061
AAEL001447-RH	0.376825	6.38478	3.3808
AAEL001447-RI	2.23e-06	2.63e-05	1.4265e-05
AAEL001448-RA	1.58073	4.23481	2.90777
AAEL001448-RB	9.26e-10	1.3303	0.66515
AAEL001448-RC	0.271427	0	0.135713
AAEL001448-RD	0.525609	3.51205	2.01883
AAEL001448-RE	0.557958	2.80834	1.68315
AAEL001448-RF	0.856293	0.797893	0.827093
AAEL001448-RG	3.09e-09	0.238831	0.119416
AAEL001448-RH	0.792063	0.709235	0.750649
AAEL001448-RI	0	7.40129	3.70065
AAEL001449-RA	0	3.22155	1.61078
AAEL001449-RB	0.101175	0	0.0505875
AAEL001451-RA	3.65091	4.4267	4.0388
AAEL001457-RA	0.0932121	0.0218034	0.0575078
AAEL001459-RA	0	0	0
AAEL001459-RB	0.0537741	0.909412	0.481593
AAEL001461-RA	0	0	0
AAEL001464-RB	0	0.055131	0.0275655
AAEL001464-RC	0	0.230878	0.115439
AAEL001464-RD	0	0	0
AAEL001464-RE	0.262506	1.29848	0.780493
AAEL001464-RF	0.0951079	0.371383	0.233245
AAEL001597-RA	1.74426	3.36423	2.55424
AAEL001600-RA	0	0.112623	0.0563115
AAEL001600-RB	0	0.966253	0.483127
AAEL001600-RC	0.37065	2.87104	1.62084
AAEL001601-RA	2.57688	4.51148	3.54418
AAEL001601-RB	3.82951	5.7757	4.8026
AAEL001601-RC	0	0	0
AAEL001601-RD	2.57688	4.51148	3.54418
AAEL001604-RB	0	0	0
AAEL001604-RC	0.258356	4.02734	2.14285
AAEL001607-RA	0	1.77244	0.88622
AAEL001607-RB	4.11405	9.45653	6.78529
AAEL001610-RA	0.593535	4.88698	2.74026
AAEL001612-RA	0.227187	1.08601	0.656598
AAEL001615-RA	67.1476	45.7825	56.465
AAEL001616-RA	1.69003	2.0377	1.86387
AAEL001616-RB	0.24112	0.791577	0.516348
AAEL001616-RC	0.609954	1.57546	1.09271
AAEL001619-RA	23.9596	22.6135	23.2865
AAEL001622-RA	8.36697	13.298	10.8325
AAEL001622-RB	1.03511	2.45908	1.7471
AAEL001623-RA	113.499	132.581	123.04
AAEL001624-RA	0.236676	9.20778	4.72223
AAEL001625-RA	0.52602	0.0755184	0.300769
AAEL001626-RA	33.1022	24.8599	28.9811
AAEL001627-RA	3.08544	5.73209	4.40877
AAEL001628-RA	0.0448993	0.244617	0.144758
AAEL001631-RA	1.40826	3.10327	2.25577
AAEL002047-RA	2628.7	2309.42	2469.06
AAEL002048-RA	12.0033	19.1111	15.5572
AAEL002048-RB	2.67042	2.54372	2.60707
AAEL002072-RA	0	0	0
AAEL002077-RA	27.6645	37.4833	32.5739
AAEL002078-RA	5.6667	12.0822	8.87445
AAEL002084-RB	3.1921	19.7098	11.451
AAEL002135-RA	9.73056	17.4574	13.594
AAEL002137-RD	8.96124	23.9324	16.4468
AAEL002139-RA	8.08007	12.9254	10.5027
AAEL002140-RA	43.2514	41.8839	42.5677
AAEL002141-RA	0.119161	0.0837097	0.101435
AAEL002142-RA	0.443954	9.55521	4.99958
AAEL002145-RA	1.46358	5.35417	3.40888
AAEL002145-RB	4.79315	10.5772	7.68517
AAEL002148-RA	14.1679	10.4931	12.3305
AAEL002152-RA	2.38814	8.26878	5.32846
AAEL002153-RA	0	0	0
AAEL002155-RA	24.4454	31.697	28.0712
AAEL002157-RA	4.24995	9.82576	7.03786
AAEL002157-RB	1.81679	1.05829	1.43754
AAEL002158-RA	183.308	274.3	228.804
AAEL002159-RA	1.62532	6.0141	3.81971
AAEL002160-RA	96.7283	112.148	104.438
AAEL002161-RA	46.8562	49.1226	47.9894
AAEL002163-RA	26.4704	32.5825	29.5265
AAEL002165-RA	19.7871	7.72659	13.7568
AAEL002167-RA	0	0	0
AAEL002169-RB	2.69403	12.1109	7.40247
AAEL002170-RA	28.8522	27.8749	28.3636
AAEL002170-RB	0	0	0
AAEL002173-RB	0.0726177	0.0849374	0.0787776
AAEL002174-RA	49.8441	49.3168	49.5804
AAEL002175-RA	22.1726	37.5635	29.868
AAEL002176-RB	3.17502	3.1847	3.17986
AAEL002177-RA	0	0.130744	0.065372
AAEL002178-RB	9.41e-07	0	4.705e-07
AAEL002178-RC	6.4734	4.89808	5.68574
AAEL002178-RD	6.37503	23.8475	15.1113
AAEL002211-RA	0	0	0
AAEL002287-RB	0.00758602	0.697268	0.352427
AAEL002287-RC	2.70457	5.91188	4.30823
AAEL002287-RD	2.45514	2.68892	2.57203
AAEL002321-RA	0.0074343	0.23536	0.121397
AAEL002321-RB	0	0	0
AAEL002321-RC	0.209565	0.998249	0.603907
AAEL002331-RA	5.27144	12.5405	8.90597
AAEL002335-RB	0.0642964	0.0377115	0.051004
AAEL002335-RC	0.465754	0.764491	0.615123
AAEL002343-RA	0.169228	0.297769	0.233498
AAEL002343-RB	0.0290803	0.0152815	0.0221809
AAEL002346-RC	1.18048	2.88403	2.03226
AAEL002346-RD	5.20448	11.032	8.11824
AAEL002346-RE	1.39473	6.54876	3.97174
AAEL002348-RB	0.045287	0.886612	0.465949
AAEL002354-RB	4.56e-08	3.19e-07	1.823e-07
AAEL002354-RC	0.00240916	0.0233134	0.0128613
AAEL002354-RD	0.00025471	0.00230454	0.00127962
AAEL002354-RE	3.97e-06	3.17e-05	1.7835e-05
AAEL002354-RF	0.00871569	0.0876499	0.0481828
AAEL002357-RA	0	0	0
AAEL002357-RB	6.25e-05	2.51e-05	4.38e-05
AAEL002357-RC	0.00019096	2.36e-08	9.54918e-05
AAEL002357-RD	0	0	0
AAEL002357-RE	0.0339269	0.0165758	0.0252514
AAEL002357-RF	0.0516859	0.0255838	0.0386348
AAEL002357-RG	0.0350907	0.0518928	0.0434918
AAEL002357-RH	0	0.0515586	0.0257793
AAEL002357-RI	0.192166	0.299405	0.245785
AAEL002407-RB	15.2656	35.1331	25.1993
AAEL002408-RB	0.245939	1.52972	0.887829
AAEL002410-RB	0.00985958	0.0160517	0.0129556
AAEL002410-RC	0.015034	0.0247977	0.0199158
AAEL002411-RC	86.6156	112.622	99.6188
AAEL002411-RD	41.5922	44.6425	43.1174
AAEL002412-RA	4.3886	5.96093	5.17477
AAEL002413-RA	0.0849796	3.83358	1.95928
AAEL002415-RC	0	0.942282	0.471141
AAEL002415-RD	0.302988	0	0.151494
AAEL002415-RE	0	7.01e-09	3.505e-09
AAEL002415-RF	1.62598	1.89209	1.75903
AAEL002415-RG	0.533347	0.246578	0.389962
AAEL002415-RH	0	0.2231	0.11155
AAEL002416-RA	20.2568	15.4265	17.8417
AAEL002416-RB	4.22349	16.4296	10.3265
AAEL002417-RA	1.18966	0.449963	0.819811
AAEL002417-RB	16.1589	10.0824	13.1206
AAEL002417-RC	0.404265	0	0.202132
AAEL002417-RD	2.79287	1.2015	1.99718
AAEL002417-RE	0.384684	0	0.192342
AAEL002417-RF	5.12869	6.88312	6.00591
AAEL002417-RG	0.197361	0	0.0986805
AAEL002417-RH	0	0.104038	0.052019
AAEL002417-RI	0	0	0
AAEL002417-RJ	0	3.33e-09	1.665e-09
AAEL002417-RK	0.0339909	0.266117	0.150054
AAEL002417-RL	0	0	0
AAEL002417-RM	0.279922	0	0.139961
AAEL002417-RN	0.114693	0	0.0573465
AAEL002417-RO	0.760071	0	0.380036
AAEL002417-RP	0	0.089048	0.044524
AAEL002418-RA	48.452	25.2697	36.8608
AAEL002419-RA	1.64009	4.56404	3.10207
AAEL002422-RB	0	1.93263	0.966315
AAEL002422-RC	0	9.85707	4.92854
AAEL002422-RD	0	0	0
AAEL002422-RE	0	0	0
AAEL002422-RF	0	1.87016	0.93508
AAEL002422-RG	0	4.49325	2.24662
AAEL002422-RH	0	0.154752	0.077376
AAEL002422-RI	0	2.01776	1.00888
AAEL002422-RJ	0	0.593397	0.296698
AAEL002422-RK	0	1.7356	0.8678
AAEL002422-RL	0	1.02118	0.51059
AAEL002422-RM	0	0.805069	0.402535
AAEL002422-RN	0	0.95556	0.47778
AAEL002422-RO	0	2.7944	1.3972
AAEL002422-RP	0	0.0628862	0.0314431
AAEL002423-RA	2.34181	1.48276	1.91229
AAEL002425-RA	0	0	0
AAEL002426-RA	17.3265	19.4412	18.3838
AAEL002427-RB	0.951013	2.68996	1.82049
AAEL002428-RB	0	0.568594	0.284297
AAEL002428-RC	3.16951	7.26885	5.21918
AAEL002428-RD	0	0.319794	0.159897
AAEL002428-RE	0.0333995	0	0.0166997
AAEL002430-RA	7.02203	7.52753	7.27478
AAEL002432-RA	0.48959	1.46068	0.975135
AAEL002433-RA	4.9856	6.73345	5.85952
AAEL002435-RA	1.74529	3.376	2.56065
AAEL002435-RB	1.03076	4.23539	2.63307
AAEL002435-RC	0.342544	1.91393	1.12824
AAEL002435-RD	0.891952	1.77257	1.33226
AAEL002435-RE	9.94424	32.2828	21.1135
AAEL002435-RF	0	2.81685	1.40843
AAEL002436-RD	1.6059	3.29807	2.45199
AAEL002436-RE	3.73715	2.13289	2.93502
AAEL002436-RF	4.41885	5.70518	5.06202
AAEL002438-RB	0.120982	0.105417	0.1132
AAEL002450-RA	4.09484	6.83855	5.46669
AAEL002451-RB	0.0421418	1.76487	0.903506
AAEL002453-RB	1.95599	4.20894	3.08247
AAEL002454-RA	0.326503	0.537409	0.431956
AAEL002455-RB	2.117	0.866706	1.49185
AAEL002455-RC	0.323474	10.133	5.22824
AAEL002455-RD	0.137368	0.0758307	0.106599
AAEL002499-RA	0.479906	1.82304	1.15147
AAEL002501-RA	38.2081	48.4566	43.3324
AAEL002501-RB	24.4942	30.5074	27.5008
AAEL002502-RA	2.24357	2.21991	2.23174
AAEL002503-RA	9.03047	16.6188	12.8246
AAEL002504-RB	203.867	201.984	202.925
AAEL002506-RA	0.364185	0.442646	0.403415
AAEL002508-RA	38.0239	44.0604	41.0421
AAEL002510-RA	0	0.259007	0.129503
AAEL002510-RB	22.2103	39.8662	31.0382
AAEL002510-RC	0.376004	0.167864	0.271934
AAEL002510-RD	11.5674	24.0328	17.8001
AAEL002512-RA	1.67573	0.860439	1.26808
AAEL002514-RB	1.69052	5.87802	3.78427
AAEL002518-RB	0	0	0
AAEL002518-RC	0	0	0
AAEL002518-RD	0	0.180068	0.090034
AAEL002518-RE	0.020376	0	0.010188
AAEL002518-RF	0.0519151	0.164792	0.108354
AAEL002520-RA	0.469312	0.574955	0.522134
AAEL002520-RB	0	0	0
AAEL002523-RA	55.6463	42.1942	48.9202
AAEL002524-RA	0.208591	0.48139	0.34499
AAEL002525-RA	1.42829	3.24773	2.33801
AAEL002526-RA	124.662	122.433	123.548
AAEL002527-RA	112.788	124.639	118.713
AAEL002527-RB	17.4872	10.0596	13.7734
AAEL002529-RA	9.39339	18.5478	13.9706
AAEL002531-RA	2.17119	3.26447	2.71783
AAEL002534-RA	3655.73	3480.79	3568.26
AAEL002537-RB	0.0462159	0.0661523	0.0561841
AAEL002538-RA	0.596666	0.31307	0.454868
AAEL002539-RA	49.8618	45.3866	47.6242
AAEL002539-RB	4.17324	5.87876	5.026
AAEL002541-RB	0.214295	0.234661	0.224478
AAEL002542-RA	74.3655	143.79	109.078
AAEL002543-RB	0	0.200116	0.100058
AAEL002543-RC	0	0	0
AAEL002543-RD	2.18113	8.58811	5.38462
AAEL002543-RE	0	0	0
AAEL002544-RA	9.81995	6.55365	8.1868
AAEL002544-RB	7.09339	5.59943	6.34641
AAEL002546-RA	0.38757	8.05924	4.22341
AAEL002547-RA	0.0441527	0.14193	0.0930413
AAEL002548-RB	2.15619	12.2828	7.2195
AAEL002549-RA	0.0904882	0.286927	0.188708
AAEL002550-RE	0	0.90773	0.453865
AAEL002550-RF	0	1.58713	0.793565
AAEL002550-RG	1.41836	12.5285	6.97343
AAEL002551-RB	19.9631	49.9299	34.9465
AAEL002554-RC	0	0.474094	0.237047
AAEL002554-RD	0.32682	19.5665	9.94666
AAEL002554-RE	0.516528	7.47196	3.99424
AAEL002554-RF	0	0.0276623	0.0138312
AAEL002555-RB	8.17492	0	4.08746
AAEL002555-RC	4.25861	0	2.12931
AAEL002555-RD	0	0	0
AAEL002555-RE	1.22238	0.851714	1.03705
AAEL002555-RF	254.482	21.1814	137.832
AAEL002556-RB	1.71752	2.31469	2.01611
AAEL002557-RB	0	13.7182	6.8591
AAEL002557-RC	0	0.33308	0.16654
AAEL002557-RD	0.45553	0	0.227765
AAEL002557-RE	1.01543	0.681773	0.848602
AAEL002557-RF	0	0.0122925	0.00614625
AAEL002557-RG	0	0	0
AAEL002559-RB	0.110851	2.04612	1.07849
AAEL002560-RA	146.304	59.0241	102.664
AAEL002560-RB	2.36498	0	1.18249
AAEL002560-RC	1.05337	0.167784	0.610577
AAEL002562-RA	4.70073	9.89866	7.29969
AAEL002562-RB	10.1537	9.52863	9.84117
AAEL002563-RA	6.49193	7.93467	7.2133
AAEL002564-RA	0	0	0
AAEL002565-RA	0	0	0
AAEL002565-RB	0.22791	0.153898	0.190904
AAEL002565-RC	0	0	0
AAEL002565-RD	0	0	0
AAEL002565-RE	0	0	0
AAEL002565-RF	6.31e-11	0	3.155e-11
AAEL002565-RG	0.675432	0.423388	0.54941
AAEL002565-RH	3.04481	2.36259	2.7037
AAEL002566-RA	0	0.104361	0.0521805
AAEL002567-RA	0.258932	0.090113	0.174522
AAEL002567-RB	0	0	0
AAEL002567-RC	0.640221	0.0637319	0.351976
AAEL002567-RD	0	0	0
AAEL002567-RE	0	0	0
AAEL002569-RB	0.463023	11.6799	6.07146
AAEL002569-RC	0	0.602137	0.301069
AAEL002569-RD	0	0	0
AAEL002571-RB	0	0.00807734	0.00403867
AAEL002571-RC	0	0.0338528	0.0169264
AAEL002571-RD	0	0	0
AAEL002571-RE	0.000361471	0	0.000180735
AAEL002571-RF	0	0	0
AAEL002571-RG	0	0	0
AAEL002571-RH	0	0	0
AAEL002571-RI	0.0648498	0	0.0324249
AAEL002571-RJ	0	0	0
AAEL002572-RA	127.34	95.0906	111.215
AAEL002574-RA	0.112293	0.014578	0.0634355
AAEL002575-RB	0	0.0944234	0.0472117
AAEL002575-RC	0	0	0
AAEL002733-RB	34.8835	28.1025	31.493
AAEL002733-RC	1.58266	0	0.79133
AAEL002733-RD	1.94485	0.457004	1.20093
AAEL002733-RE	23.5076	18.7566	21.1321
AAEL002740-RB	0.0123681	0.821905	0.417137
AAEL002740-RC	0.000654259	2.60205	1.30135
AAEL002741-RB	0.0255539	0.00996484	0.0177594
AAEL002742-RB	0.684326	0.522672	0.603499
AAEL002745-RB	0.0102614	0.00400799	0.00713469
AAEL002754-RB	0.0235647	0.0552018	0.0393833
AAEL002764-RC	43.8697	43.413	43.6414
AAEL002764-RD	2.26014	2.90305	2.5816
AAEL002764-RE	38.7165	44.3246	41.5206
AAEL002766-RA	7.35945	6.56773	6.96359
AAEL002769-RB	0.133827	0.157982	0.145904
AAEL002769-RC	0.0122547	4.02279	2.01752
AAEL002769-RD	0	1.977	0.9885
AAEL002769-RE	0.0001063	1.33704	0.668573
AAEL002773-RA	0.3642	0.274557	0.319379
AAEL002775-RA	1.21822	0.692683	0.955452
AAEL002775-RB	0.0849538	0.597931	0.341442
AAEL002783-RA	35.3328	23.1786	29.2557
AAEL002784-RA	26.3118	30.3487	28.3302
AAEL002785-RA	0.144255	4.32892	2.23659
AAEL002786-RA	0	0	0
AAEL002786-RB	0.0506828	0	0.0253414
AAEL002786-RC	7.5e-06	0.0321484	0.016078
AAEL002790-RA	2.85083	3.9199	3.38537
AAEL002791-RA	4.17284	9.50916	6.841
AAEL002792-RA	0	0.394919	0.19746
AAEL002796-RA	1.66107	2.06675	1.86391
AAEL002796-RB	2.3e-07	0	1.15e-07
AAEL002800-RA	0.0648344	1.32197	0.693402
AAEL002801-RA	3.00558	9.49439	6.24998
AAEL002803-RB	0	0	0
AAEL002803-RC	0.0436036	0.203649	0.123626
AAEL002804-RA	31.7987	46.6124	39.2056
AAEL002805-RA	10.2421	10.78	10.5111
AAEL002808-RA	22.3987	21.1107	21.7547
AAEL002809-RB	5.07256	7.00252	6.03754
AAEL002809-RC	0	0	0
AAEL002810-RA	0.276296	6.75564	3.51597
AAEL002811-RA	316.776	291.188	303.982
AAEL002812-RA	14.2489	18.7796	16.5143
AAEL002813-RA	374.646	337.902	356.274
AAEL002814-RA	0.254494	1.07036	0.662427
AAEL002816-RA	0.866576	6.3004	3.58349
AAEL002817-RB	14.1751	6.27879	10.2269
AAEL002856-RA	5.46516	17.5437	11.5044
AAEL002859-RB	13.4213	22.4018	17.9116
AAEL002860-RA	17.5709	29.7097	23.6403
AAEL002861-RA	31.3372	71.0726	51.2049
AAEL002863-RA	3.13567	7.27852	5.2071
AAEL002864-RA	1.64802	6.26328	3.95565
AAEL002866-RA	18.6809	38.1475	28.4142
AAEL002867-RA	39.5989	43.0657	41.3323
AAEL002869-RA	2.06868	2.05911	2.0639
AAEL002870-RC	44.8734	45.3997	45.1365
AAEL002874-RB	2.84914	12.1959	7.52252
AAEL002874-RC	0	1.20234	0.60117
AAEL002876-RB	0	0	0
AAEL002876-RC	0	0	0
AAEL002876-RD	0	0	0
AAEL002876-RE	0	0	0
AAEL002876-RF	0	0	0
AAEL002876-RG	0	0	0
AAEL002876-RH	0	0	0
AAEL002876-RI	0	0	0
AAEL002876-RJ	0	0	0
AAEL002876-RK	0	0	0
AAEL002876-RL	0	0	0
AAEL002876-RM	0	0	0
AAEL002876-RN	4.51e-07	1.15e-06	8.005e-07
AAEL002876-RO	0.0392488	0.141528	0.0903884
AAEL002876-RP	0	0	0
AAEL002877-RA	0	0	0
AAEL002877-RB	0	0	0
AAEL002877-RC	0.0772215	0.341272	0.209247
AAEL002878-RA	0	0	0
AAEL002879-RAA	2.42891	0.0623649	1.24564
AAEL002879-RAB	1.27259	0.145191	0.708891
AAEL002879-RAC	0	0	0
AAEL002879-RAD	0	0	0
AAEL002879-RB	6.0158	3.94739	4.98159
AAEL002879-RC	1.42e-08	2.09e-05	1.04571e-05
AAEL002879-RD	0.422027	1.38653	0.904278
AAEL002879-RE	3.05885	2.57877	2.81881
AAEL002879-RF	2.46e-07	0.000127286	6.3766e-05
AAEL002879-RG	8.66e-09	1.36e-06	6.8433e-07
AAEL002879-RH	4.60276	9.19396	6.89836
AAEL002879-RI	3.49e-07	6.52e-06	3.4345e-06
AAEL002879-RJ	0	0.142738	0.071369
AAEL002879-RK	0	0	0
AAEL002879-RL	0	0	0
AAEL002879-RM	0	0	0
AAEL002879-RN	1.57198	6.10957	3.84077
AAEL002879-RO	0	0	0
AAEL002879-RP	1.59e-07	0.000326521	0.00016334
AAEL002879-RQ	0	0	0
AAEL002879-RR	0	0	0
AAEL002879-RS	0	0	0
AAEL002879-RT	0.21204	0.151346	0.181693
AAEL002879-RU	0.143818	0	0.071909
AAEL002879-RV	2.54805	2.19171	2.36988
AAEL002879-RW	0	0	0
AAEL002879-RX	4.11e-07	0.00357315	0.00178678
AAEL002879-RY	5.61e-07	0.000208729	0.000104645
AAEL002879-RZ	3.13e-07	0.00985261	0.00492646
AAEL002880-RA	0	0.103075	0.0515375
AAEL002881-RA	609.004	586.385	597.695
AAEL002882-RA	0	0.132679	0.0663395
AAEL002886-RA	9.80822	10.6937	10.251
AAEL002886-RB	107.854	91.0836	99.4688
AAEL002886-RC	1.27712	2.21951	1.74832
AAEL002886-RD	40.4973	46.5893	43.5433
AAEL002887-RA	20.9467	20.1274	20.5371
AAEL002887-RB	0.745439	0.709853	0.727646
AAEL002887-RC	7.23e-08	3.09e-06	1.58115e-06
AAEL002887-RD	0	0	0
AAEL002887-RE	0	0.20084	0.10042
AAEL002887-RF	0	0	0
AAEL002887-RG	0.26519	0.32218	0.293685
AAEL002887-RH	0.906678	1.03438	0.970529
AAEL002887-RI	0.0411855	0.0525956	0.0468906
AAEL002888-RA	2.83042	1.88993	2.36017
AAEL002888-RB	11.9224	12.5737	12.248
AAEL002890-RA	8.14955	12.6559	10.4027
AAEL002890-RB	1.13003	6.3857	3.75786
AAEL002890-RC	0	0.179673	0.0898365
AAEL002890-RD	0.401558	0.177361	0.289459
AAEL002891-RB	0.720099	9.09537	4.90773
AAEL002892-RA	0.55792	2.35765	1.45778
AAEL002892-RB	0	0	0
AAEL002892-RC	0	0.137986	0.068993
AAEL002892-RD	0.218075	0.144409	0.181242
AAEL002892-RE	0.0658976	0.00345991	0.0346788
AAEL002892-RF	1.43e-08	1.84235	0.921175
AAEL002893-RA	0	0.124291	0.0621455
AAEL002895-RA	1.15742	5.57351	3.36546
AAEL002896-RB	0.00246657	0.00314984	0.00280821
AAEL002896-RC	8.97e-05	0.00010344	9.657e-05
AAEL002896-RD	0.000595415	0.000727708	0.000661561
AAEL002896-RE	0.0164538	0.0222797	0.0193668
AAEL002898-RA	19.6634	59.0086	39.336
AAEL002900-RA	33.6128	50.4419	42.0273
AAEL002903-RA	0.467787	8.11701	4.2924
AAEL002903-RB	1.78e-05	0.652183	0.3261
AAEL002903-RC	0.0660597	0.178556	0.122308
AAEL002904-RA	0	0.0153727	0.00768635
AAEL002905-RA	1.10205	7.68523	4.39364
AAEL002906-RA	19.563	21.1113	20.3372
AAEL002910-RB	3.90964	6.61027	5.25995
AAEL002912-RA	19.482	19.9385	19.7103
AAEL002913-RB	70.319	39.4454	54.8822
AAEL002916-RA	0	0.0469445	0.0234723
AAEL002917-RA	0.603826	0.934731	0.769278
AAEL002918-RB	0.886037	2.63197	1.759
AAEL002921-RB	0	7.93147	3.96574
AAEL002922-RA	1.32782	1.30069	1.31425
AAEL002924-RC	6.8848	10.4441	8.66445
AAEL002924-RD	0	3.55137	1.77568
AAEL002924-RE	0.631066	2.80611	1.71859
AAEL002924-RF	1.27388	0.83206	1.05297
AAEL002925-RA	0.404764	1.55581	0.980287
AAEL002925-RB	0.289197	1.77109	1.03014
AAEL002925-RC	0.270567	1.06508	0.667824
AAEL002929-RA	0	0	0
AAEL002930-RB	0.781424	1.25788	1.01965
AAEL002932-RB	0	0.0802435	0.0401217
AAEL002933-RA	33.1135	40.9105	37.012
AAEL002934-RB	4.46244	9.39922	6.93083
AAEL002935-RC	0.832343	1.87809	1.35522
AAEL002935-RD	0	0.171919	0.0859595
AAEL002935-RE	0	0	0
AAEL002935-RF	1.18492	1.15881	1.17186
AAEL002938-RA	11.5573	17.8763	14.7168
AAEL002938-RB	0.23617	0.327217	0.281693
AAEL002940-RA	0	0	0
AAEL002943-RB	0.18771	0.294949	0.24133
AAEL002944-RA	2.07492	5.84869	3.96181
AAEL002948-RA	8.65262	11.23	9.94131
AAEL002949-RA	0	1.23362	0.61681
AAEL002950-RB	0.369166	1.37499	0.872078
AAEL002950-RC	1.0511	17.7025	9.3768
AAEL002951-RA	0.0323383	0.214223	0.123281
AAEL002955-RA	0	0	0
AAEL002955-RB	0.138766	0.0881022	0.113434
AAEL002959-RA	0	0.0360365	0.0180182
AAEL002960-RA	0	0	0
AAEL002961-RA	0	0.0221918	0.0110959
AAEL002962-RA	0.0045998	0.0645594	0.0345796
AAEL002964-RA	0.167434	4.59098	2.37921
AAEL002965-RA	0	0	0
AAEL002967-RA	1.13278	1.88009	1.50643
AAEL002969-RA	0.0937797	0.510816	0.302298
AAEL002972-RA	0.0582935	0.136254	0.0972737
AAEL002978-RA	10.6271	66.1543	38.3907
AAEL002978-RB	8.32e-05	0.108408	0.0542456
AAEL002978-RC	0.722972	33.1059	16.9144
AAEL002978-RD	22.7595	32.0003	27.3799
AAEL002979-RA	1.533	4.37148	2.95224
AAEL002989-RA	3.91796	10.6389	7.27843
AAEL002993-RA	45.5188	68.1528	56.8358
AAEL002996-RA	2.88819	5.0678	3.97799
AAEL002999-RA	0.104685	1.70839	0.906537
AAEL002999-RB	1.19904	1.72891	1.46398
AAEL002999-RC	2.34449	8.05e-07	1.17225
AAEL003000-RA	1.44424	0	0.72212
AAEL003002-RB	0.00792742	0.185515	0.0967212
AAEL003004-RB	5.77552	29.8328	17.8042
AAEL003008-RB	2.35578	11.961	7.15839
AAEL003012-RA	0	0.00983451	0.00491725
AAEL003016-RA	0	0	0
AAEL003016-RB	0	0	0
AAEL003016-RC	0.120564	0.420137	0.27035
AAEL003018-RA	0	0.137966	0.068983
AAEL003018-RB	0.312803	0.175542	0.244173
AAEL003018-RC	0	0	0
AAEL003019-RB	1.13972	2.51071	1.82522
AAEL003019-RC	5.12179	8.32278	6.72228
AAEL003020-RA	0	0	0
AAEL003022-RA	1.06127	4.97085	3.01606
AAEL003022-RB	1.2577	2.55142	1.90456
AAEL003026-RA	0	0.162338	0.081169
AAEL003026-RB	1.38e-09	1.33764	0.66882
AAEL003026-RC	6.06e-08	0	3.03e-08
AAEL003026-RD	6.23e-10	0	3.115e-10
AAEL003026-RE	2.45e-07	1.4e-10	1.2257e-07
AAEL003026-RF	0.00165013	0	0.000825065
AAEL003026-RG	0.169876	0	0.084938
AAEL003032-RB	3.24835	11.9777	7.61303
AAEL003034-RA	5.98081	7.96799	6.9744
AAEL003035-RA	0.0944778	0.0735142	0.083996
AAEL003036-RA	0.299955	2.1246	1.21228
AAEL003039-RA	78.0371	116.122	97.0795
AAEL003041-RA	0	0.247728	0.123864
AAEL003043-RB	0.0778849	4.33e-07	0.0389427
AAEL003043-RC	0	0.111595	0.0557975
AAEL003045-RA	0	0	0
AAEL003045-RB	0	0.0177096	0.0088548
AAEL003046-RB	74.319	111.103	92.711
AAEL003047-RB	1.1679	1.12956	1.14873
AAEL003047-RC	3.12e-09	1.66e-09	2.39e-09
AAEL003049-RA	0.035303	0.0205898	0.0279464
AAEL003100-RA	0	0	0
AAEL003100-RB	0	0	0
AAEL003100-RC	0	0.0586218	0.0293109
AAEL003103-RA	40.5917	46.4112	43.5015
AAEL003103-RB	43.975	61.4233	52.6992
AAEL003103-RC	10.9487	18.6212	14.785
AAEL003107-RA	0.206699	0.313137	0.259918
AAEL003109-RA	9.64143	16.0121	12.8268
AAEL003109-RB	5.09512	2.91478	4.00495
AAEL003109-RC	1.07163	0.611696	0.841663
AAEL003154-RA	1.06439	1.52482	1.29461
AAEL003156-RA	0.0867484	0	0.0433742
AAEL003156-RB	0	0	0
AAEL003160-RA	952.323	1117.43	1034.88
AAEL003161-RA	56.3215	57.7607	57.0411
AAEL003163-RB	0.00832423	0.0249225	0.0166234
AAEL003165-RA	8.39771	16.5758	12.4868
AAEL003170-RB	5.80769	9.04424	7.42596
AAEL003173-RA	0.530162	0.42251	0.476336
AAEL003173-RB	0	0	0
AAEL003176-RA	0.434425	1.76061	1.09752
AAEL003177-RA	0.202815	0.0589992	0.130907
AAEL003179-RB	35.6942	72.4213	54.0577
AAEL003180-RA	24.5591	38.0424	31.3008
AAEL003181-RA	0	0	0
AAEL003182-RA	0.0447095	0	0.0223547
AAEL003183-RA	0	0.275328	0.137664
AAEL003184-RC	0	0	0
AAEL003184-RD	0.339615	1.33238	0.835997
AAEL003184-RE	0.220725	0.170729	0.195727
AAEL003187-RA	0	0	0
AAEL003190-RA	18.528	10.0947	14.3113
AAEL003193-RA	15.4185	13.719	14.5687
AAEL003193-RB	24.8936	47.233	36.0633
AAEL003194-RA	2.79989	1.95703	2.37846
AAEL003196-RA	0	0	0
AAEL003198-RA	0	8.04e-08	4.02e-08
AAEL003201-RA	0	0	0
AAEL003203-RC	15.2383	24.7141	19.9762
AAEL003203-RD	84.0861	67.9406	76.0134
AAEL003203-RE	0.499397	0.721495	0.610446
AAEL003203-RF	0.661468	0.680353	0.67091
AAEL003206-RA	43.2517	42.7524	43.002
AAEL003211-RA	0	0	0
AAEL003211-RB	0.0663276	0.155199	0.110763
AAEL003213-RB	3.13916	2.87832	3.00874
AAEL003214-RA	0	0	0
AAEL003228-RA	3.63446	7.78922	5.71184
AAEL003228-RB	0	0	0
AAEL003228-RC	0	0	0
AAEL003229-RA	7.98e-05	3.71e-05	5.845e-05
AAEL003229-RB	5.58398	14.4561	10.02
AAEL003230-RA	9.60127	14.469	12.0351
AAEL003233-RA	0	0.311396	0.155698
AAEL003237-RA	3.83931	3.73125	3.78528
AAEL003238-RA	3.16575	4.21215	3.68895
AAEL003239-RA	0	0	0
AAEL003243-RA	0.246469	25.0793	12.6629
AAEL003253-RA	0	0.465195	0.232598
AAEL003253-RB	0	0	0
AAEL003257-RB	0	0.774356	0.387178
AAEL003260-RA	0.86637	0.742464	0.804417
AAEL003262-RA	0	0.0160396	0.0080198
AAEL003267-RB	1.66727	2.09601	1.88164
AAEL003267-RC	7.20119	10.8787	9.03994
AAEL003271-RB	0.295235	1.72146	1.00835
AAEL003275-RA	4.24187	18.9885	11.6152
AAEL003277-RA	0.444999	2.28458	1.36479
AAEL003277-RB	0	0.95992	0.47996
AAEL003277-RC	0	0	0
AAEL003277-RD	0	0.193529	0.0967645
AAEL003277-RE	0	0.466935	0.233467
AAEL003277-RF	0	0	0
AAEL003277-RG	0.0738342	0	0.0369171
AAEL003277-RH	0	1.70191	0.850955
AAEL003279-RA	0.363776	1.53571	0.949743
AAEL003281-RB	10.8786	8.40968	9.64414
AAEL003283-RB	0	0	0
AAEL003283-RC	0	0	0
AAEL003283-RD	0	0.0522977	0.0261489
AAEL003283-RE	0.385215	1.72226	1.05374
AAEL003283-RF	5.19028	4.69501	4.94264
AAEL003283-RG	0	0	0
AAEL003283-RH	0	0	0
AAEL003329-RA	0	0	0
AAEL003340-RA	0	0	0
AAEL003341-RB	0	0	0
AAEL003353-RA	0	0	0
AAEL003490-RA	1.80604	4.34846	3.07725
AAEL003491-RC	0	0	0
AAEL003491-RD	14.063	13.5803	13.8216
AAEL003491-RE	13.0276	18.1771	15.6023
AAEL003491-RF	4.70337	4.29926	4.50131
AAEL003495-RB	1.67558	3.17379	2.42469
AAEL003495-RC	0	0.577511	0.288755
AAEL003495-RD	0.235506	2.73049	1.483
AAEL003501-RA	0	0.0338913	0.0169456
AAEL003503-RA	21.9687	39.9264	30.9475
AAEL003504-RB	0.0260469	0	0.0130235
AAEL003506-RA	0.0176766	0.0310155	0.0243461
AAEL003581-RC	0	2.70137	1.35068
AAEL003581-RD	12.8365	21.2938	17.0651
AAEL003582-RA	2863.02	2735.1	2799.06
AAEL003597-RA	13.6418	17.4629	15.5524
AAEL003597-RB	0.489859	0.467332	0.478596
AAEL003599-RA	1.44014	8.43314	4.93664
AAEL003599-RB	1.85373	4.27558	3.06466
AAEL003599-RC	2.56958	4.64747	3.60853
AAEL003600-RA	0	1.90268	0.95134
AAEL003601-RA	0.525759	2.77581	1.65078
AAEL003605-RA	0.486237	0.826937	0.656587
AAEL003605-RB	13.5406	20.5283	17.0344
AAEL003606-RA	25.8717	36.1	30.9858
AAEL003611-RA	0.285858	3.12971	1.70778
AAEL003611-RB	1.1131	1.12251	1.1178
AAEL003613-RA	0	0.186123	0.0930615
AAEL003613-RB	0.0270343	0	0.0135172
AAEL003622-RA	0.195654	0.0327924	0.114223
AAEL003622-RB	0	0	0
AAEL003622-RC	0	0	0
AAEL003622-RD	0.303093	0.348803	0.325948
AAEL003628-RA	0	0.462099	0.231049
AAEL003629-RA	0	0	0
AAEL003631-RA	0.164257	0.255788	0.210023
AAEL003632-RA	0	0.129224	0.064612
AAEL003634-RA	40.6355	50.1114	45.3735
AAEL003645-RA	274.157	220.795	247.476
AAEL003742-RA	149.903	6.83441	78.3687
AAEL003743-RA	1.48341	1.86535	1.67438
AAEL003743-RB	4.88658	6.59588	5.74123
AAEL003743-RC	0.282323	0.161822	0.222073
AAEL003743-RD	9.13547	7.28085	8.20816
AAEL003743-RE	1.44392	10.1254	5.78466
AAEL003746-RA	16.3572	32.2227	24.29
AAEL003748-RA	13.869	49.2514	31.5602
AAEL003749-RA	8.52131	13.1461	10.8337
AAEL003749-RB	5.26578	8.21874	6.74226
AAEL003750-RA	268.866	356.489	312.678
AAEL003752-RA	50.1063	30.0733	40.0898
AAEL003754-RA	7.08e-10	3.20529	1.60265
AAEL003754-RB	0	0	0
AAEL003754-RC	0	0	0
AAEL003754-RD	0.180998	2.40029	1.29064
AAEL003754-RE	1.02695	1.61636	1.32166
AAEL003754-RF	1.77641	1.22904	1.50272
AAEL003755-RA	4.51035	7.30068	5.90551
AAEL003756-RA	1.9511	7.1602	4.55565
AAEL003757-RA	0	0.100983	0.0504915
AAEL003758-RA	14.0884	19.5973	16.8428
AAEL003758-RB	0	0	0
AAEL003762-RA	0.349215	0.912246	0.63073
AAEL003762-RB	0.967758	2.18041	1.57408
AAEL003762-RC	0.020648	0.0681195	0.0443837
AAEL003762-RD	0.968041	3.54761	2.25783
AAEL003763-RA	9.58866	6.19548	7.89207
AAEL003764-RA	381.844	295.113	338.478
AAEL003766-RA	0.110874	0.67949	0.395182
AAEL003768-RB	0	0.399568	0.199784
AAEL003768-RC	0.206205	0.412859	0.309532
AAEL003768-RD	0.86117	0.00791722	0.434544
AAEL003768-RE	5.40562	11.3096	8.35761
AAEL003769-RB	33.6595	39.5232	36.5914
AAEL003770-RA	6.86682	13.108	9.98741
AAEL003771-RA	0.426369	5.68776	3.05706
AAEL003771-RB	2.85141	6.24242	4.54692
AAEL003772-RB	0.0980937	0.114792	0.106443
AAEL003773-RA	0	1.64692	0.82346
AAEL003774-RA	46.4141	39.4179	42.916
AAEL003776-RA	6.77101	9.10705	7.93903
AAEL003777-RB	0	0.669537	0.334769
AAEL003777-RC	0	0	0
AAEL003777-RD	0.421603	5.87071	3.14616
AAEL003777-RE	0	0	0
AAEL003777-RF	0	0.0915697	0.0457849
AAEL003777-RG	0.801268	0	0.400634
AAEL003779-RB	1.75708	6.78776	4.27242
AAEL003781-RA	0.647556	0.568699	0.608127
AAEL003781-RB	4.10841	4.52544	4.31692
AAEL003782-RA	0.152403	0.177693	0.165048
AAEL003785-RA	18.2271	15.6895	16.9583
AAEL003785-RB	0.890188	1.10554	0.997864
AAEL003789-RB	1.79121	11.1792	6.4852
AAEL003789-RC	1.30643	8.22537	4.7659
AAEL003791-RA	11.6527	14.8119	13.2323
AAEL003794-RB	0.0580233	1.66258	0.860302
AAEL003797-RA	0	1.32433	0.662165
AAEL003801-RA	34.4416	30.1654	32.3035
AAEL003803-RA	0.259745	0.876325	0.568035
AAEL003806-RB	0.0263477	1.08322	0.554784
AAEL003809-RA	0.0352677	0.0412157	0.0382417
AAEL003810-RA	0	0.0158236	0.0079118
AAEL003812-RB	2.06753	1.18385	1.62569
AAEL003812-RC	2.54e-05	0	1.27e-05
AAEL003812-RD	1.06482	1.71836	1.39159
AAEL003812-RE	5.28e-05	0	2.64e-05
AAEL003812-RF	0.976458	5.7756	3.37603
AAEL003812-RG	1.73e-07	0.2424	0.1212
AAEL003813-RB	1.03612	0.609661	0.82289
AAEL003813-RC	0	0	0
AAEL003813-RD	0.112569	0	0.0562845
AAEL003883-RB	3.27486	15.3392	9.30703
AAEL003903-RA	1.15077	6.10324	3.62701
AAEL003903-RB	0.124531	0.301438	0.212984
AAEL003903-RC	8.54364	27.5298	18.0367
AAEL003905-RA	0	0	0
AAEL003905-RB	0	0	0
AAEL003905-RC	0.124473	0	0.0622365
AAEL003905-RD	0	0	0
AAEL003905-RE	0	0	0
AAEL003906-RA	0.627982	6.08366	3.35582
AAEL003907-RB	6.48618	7.601	7.04359
AAEL003908-RA	6.58016	9.35908	7.96962
AAEL003909-RA	2.48058	6.7102	4.59539
AAEL003910-RB	0.407775	0.413363	0.410569
AAEL003911-RB	3.76098	9.63251	6.69674
AAEL003912-RA	11.5822	22.9207	17.2514
AAEL003913-RA	2.6289	3.28389	2.95639
AAEL003914-RB	0.847586	0.339881	0.593733
AAEL003914-RC	0	0.285303	0.142651
AAEL003914-RD	1.37e-07	0.103973	0.0519866
AAEL003914-RE	0	0	0
AAEL003914-RF	0	0	0
AAEL003914-RG	5.14e-07	0.0437826	0.0218916
AAEL003914-RH	0.206677	0.77847	0.492573
AAEL003915-RA	0	0.114161	0.0570805
AAEL003916-RA	10.5809	18.0058	14.2934
AAEL003917-RA	5.6005	5.54309	5.57179
AAEL003917-RB	0.876741	0.536283	0.706512
AAEL003917-RC	0	2.65223	1.32611
AAEL003918-RB	0	0	0
AAEL003918-RC	0	0.331989	0.165994
AAEL003918-RD	0.366709	0.600032	0.483371
AAEL003919-RA	0	1.59008	0.79504
AAEL003919-RB	0.20907	1.36938	0.789225
AAEL003919-RC	0.371952	0	0.185976
AAEL003921-RA	23.3189	27.9414	25.6302
AAEL003922-RA	5.73055	7.93078	6.83066
AAEL004042-RE	42.2967	61.1006	51.6987
AAEL004042-RF	12.116	32.6708	22.3934
AAEL004043-RA	62.3668	19.4626	40.9147
AAEL004046-RB	0.149535	0.360707	0.255121
AAEL004048-RA	0.12807	1.45514	0.791605
AAEL004050-RA	2.12707	2.62685	2.37696
AAEL004052-RA	6.48864	12.0581	9.27337
AAEL004053-RA	9.14317	21.9304	15.5368
AAEL004054-RA	1.62907	36.8571	19.2431
AAEL004055-RA	3.46003	11.9865	7.72326
AAEL004056-RB	10.1819	20.2675	15.2247
AAEL004057-RB	0.856558	0.777011	0.816785
AAEL004057-RC	8.36573	3.78742	6.07658
AAEL004059-RB	46.025	59.4796	52.7523
AAEL004060-RB	295.77	278.53	287.15
AAEL004060-RC	9.84042	7.49473	8.66757
AAEL004063-RB	31.8113	19.1215	25.4664
AAEL004064-RB	1.59778	2.83511	2.21644
AAEL004065-RA	59.6796	61.5118	60.5957
AAEL004067-RA	172.023	145.32	158.671
AAEL004068-RA	5.35874	17.4747	11.4167
AAEL004069-RA	54.2507	55.4466	54.8486
AAEL004070-RA	3.14938	4.22675	3.68806
AAEL004071-RA	155.156	153.672	154.414
AAEL004074-RA	1.69228	4.93458	3.31343
AAEL004074-RB	1.05807	3.38659	2.22233
AAEL004075-RA	13.4105	11.6589	12.5347
AAEL004076-RC	1.8822	4.24784	3.06502
AAEL004076-RD	19.0476	23.3398	21.1937
AAEL004081-RA	22.8084	45.4956	34.152
AAEL004155-RA	0	0.289403	0.144702
AAEL004163-RA	0.318827	1.29717	0.807998
AAEL004167-RA	24.483	30.7139	27.5984
AAEL004169-RA	8.85869	46.0368	27.4477
AAEL004179-RA	1.46068	0.00236439	0.731522
AAEL004179-RB	0.33801	0.814766	0.576388
AAEL004180-RB	5.33032	7.18309	6.25671
AAEL004193-RB	0.878051	0.561713	0.719882
AAEL004193-RC	1.15165	0.892186	1.02192
AAEL004193-RD	6.94e-08	0.0453848	0.0226924
AAEL004193-RE	0.472892	0.664537	0.568715
AAEL004193-RF	0.214959	0.499547	0.357253
AAEL004193-RG	0	0	0
AAEL004193-RH	7.51182	6.58992	7.05087
AAEL004195-RA	40.5752	49.0219	44.7986
AAEL004217-RB	0	3.86e-08	1.93e-08
AAEL004217-RC	0	0	0
AAEL004217-RD	0.107822	0	0.053911
AAEL004217-RE	0	0	0
AAEL004217-RF	0	2.11e-06	1.055e-06
AAEL004217-RG	0	0	0
AAEL004217-RH	0	0.0591289	0.0295644
AAEL004217-RI	0	0	0
AAEL004217-RJ	4.4e-07	0	2.2e-07
AAEL004227-RD	31.2846	21.161	26.2228
AAEL004227-RE	99.992	55.4166	77.7043
AAEL004227-RF	1.87328	0.724409	1.29884
AAEL004228-RA	12.8838	17.9533	15.4185
AAEL004229-RA	21.2781	2.44145	11.8598
AAEL004231-RA	0	0	0
AAEL004231-RB	0	0	0
AAEL004231-RC	0.0130304	0.0456655	0.0293479
AAEL004233-RB	0	0	0
AAEL004233-RC	0.00977052	0	0.00488526
AAEL004233-RD	0.0302534	0	0.0151267
AAEL004234-RA	28.1874	65.7085	46.9479
AAEL004235-RA	0.490014	11.239	5.86451
AAEL004235-RB	2.27397	5.02483	3.6494
AAEL004235-RC	0	0	0
AAEL004235-RD	0	0.418124	0.209062
AAEL004235-RE	0	0.933363	0.466682
AAEL004235-RF	0.0240822	1.13569	0.579886
AAEL004235-RG	0	0.414057	0.207029
AAEL004235-RH	0.0985365	0.068124	0.0833302
AAEL004235-RI	0	0.239667	0.119833
AAEL004235-RJ	0	1.69e-10	8.45e-11
AAEL004235-RK	0	0.0977976	0.0488988
AAEL004236-RA	0.117183	0.0853372	0.10126
AAEL004236-RB	0	0	0
AAEL004236-RC	0	0.159015	0.0795075
AAEL004236-RD	1.94522	3.04381	2.49451
AAEL004236-RE	0.705219	1.50811	1.10666
AAEL004236-RF	9.03788	5.5199	7.27889
AAEL004237-RA	2.57699	5.69913	4.13806
AAEL004238-RA	0.220635	0.275993	0.248314
AAEL004239-RA	0.204411	0.101813	0.153112
AAEL004240-RA	0.128885	0	0.0644425
AAEL004242-RA	9.97702	9.659	9.81801
AAEL004242-RB	0	0	0
AAEL004243-RA	3.32418	7.07267	5.19843
AAEL004244-RA	0.0513841	3.14296	1.59717
AAEL004245-RB	0	1.04627	0.523135
AAEL004275-RA	0	0	0
AAEL004280-RA	0	0	0
AAEL004298-RA	0	0	0
AAEL004303-RB	0	0.0233416	0.0116708
AAEL004386-RA	0	172.354	86.177
AAEL004388-RA	0	35.0276	17.5138
AAEL004389-RB	0.342192	1.98381	1.163
AAEL004390-RA	0.0410525	195.427	97.734
AAEL004392-RB	0.522302	0.384122	0.453212
AAEL004396-RB	0.0301814	7.37816	3.70417
AAEL004397-RA	4.07338	14.8128	9.44309
AAEL004398-RB	0.0348417	0.0542929	0.0445673
AAEL004399-RB	0.0571676	0.156284	0.106726
AAEL004404-RA	76.4081	74.1925	75.3003
AAEL004410-RB	0	2.27235	1.13617
AAEL004410-RC	0.75969	1.59778	1.17874
AAEL004410-RD	0.293804	0.108064	0.200934
AAEL004524-RA	0	1.85409	0.927045
AAEL004524-RB	0	0	0
AAEL004528-RA	3.07771	12.5306	7.80415
AAEL004543-RB	0.225819	0.426603	0.326211
AAEL004544-RB	0	0.036842	0.018421
AAEL004546-RA	30.7434	39.6128	35.1781
AAEL004547-RA	0	0.0678506	0.0339253
AAEL004547-RB	1.44052	6.35302	3.89677
AAEL004551-RA	1.61347	16.5671	9.09028
AAEL004552-RA	4.35688	11.0894	7.72314
AAEL004553-RA	59.6021	44.3149	51.9585
AAEL004554-RA	1.19389	5.58871	3.3913
AAEL004554-RC	10.2213	11.988	11.1046
AAEL004555-RA	0.0291291	0.74825	0.38869
AAEL004557-RB	0	0	0
AAEL004558-RA	13.9567	10.5039	12.2303
AAEL004559-RB	0	0.0967869	0.0483934
AAEL004559-RC	0	0.000906607	0.000453304
AAEL004559-RD	0.275651	8.62591	4.45078
AAEL004559-RE	0	0	0
AAEL004559-RF	3.69e-09	0.102806	0.051403
AAEL004559-RG	0	0	0
AAEL004559-RH	0.207027	0	0.103513
AAEL004559-RI	0.698286	0.24924	0.473763
AAEL004559-RJ	3.36244	5.73002	4.54623
AAEL004559-RK	0	0	0
AAEL004561-RA	0.350703	1.00971	0.680207
AAEL004562-RA	0.147093	4.42079	2.28394
AAEL004563-RA	31.4932	40.0232	35.7582
AAEL004564-RA	0	0	0
AAEL004566-RA	11.7539	12.0369	11.8954
AAEL004567-RA	30.9067	23.8222	27.3644
AAEL004568-RA	0.19344	1.04707	0.620255
AAEL004569-RA	0.630423	1.23806	0.934241
AAEL004570-RA	4.41455	11.6007	8.00763
AAEL004571-RA	0.204547	5.74524	2.97489
AAEL004572-RB	0.0573281	0.0370154	0.0471717
AAEL004572-RC	0.0788457	0.197698	0.138272
AAEL004573-RB	0	0	0
AAEL004574-RA	7.44463	8.67501	8.05982
AAEL004575-RA	0.150484	0.23013	0.190307
AAEL004575-RB	24.6969	11.4707	18.0838
AAEL004576-RA	0.175267	0.805668	0.490468
AAEL004577-RA	2.16212	4.38842	3.27527
AAEL004579-RA	0.425952	0.282375	0.354163
AAEL004579-RB	1.22791	5.96207	3.59499
AAEL004580-RA	2.04391	9.98934	6.01663
AAEL004580-RB	0	0	0
AAEL004580-RC	3.41683	1.01737	2.2171
AAEL004581-RA	0.646075	2.37939	1.51273
AAEL004581-RB	1.78452	0	0.89226
AAEL004581-RC	0	0	0
AAEL004582-RB	0.360912	1.18153	0.771221
AAEL004602-RA	0	0.0348431	0.0174216
AAEL004603-RA	79.9884	75.0675	77.528
AAEL004605-RA	0	0	0
AAEL004607-RA	9.10897	28.3912	18.7501
AAEL004608-RA	0	1.70375	0.851875
AAEL004608-RB	4.05527	5.04016	4.54772
AAEL004613-RA	45.5417	54.1812	49.8614
AAEL004616-RA	102.454	130.151	116.303
AAEL004620-RB	6.88888	15.8186	11.3537
AAEL004620-RC	2.33994	6.73119	4.53557
AAEL004623-RB	4.11377	9.63012	6.87195
AAEL004624-RB	0	12.0314	6.0157
AAEL004625-RA	5.32055	11.4055	8.36303
AAEL004630-RA	0.200533	1.0037	0.602117
AAEL004630-RB	1.22179	1.84931	1.53555
AAEL004631-RA	35.9122	16.5518	26.232
AAEL004633-RA	4.42038	6.53132	5.47585
AAEL004633-RB	0.34623	0.427913	0.387072
AAEL004634-RA	0.66983	6.70075	3.68529
AAEL004634-RB	0.278682	1.50772	0.893201
AAEL004643-RA	22.703	17.7057	20.2043
AAEL004645-RB	0.540072	4.00881	2.27444
AAEL004646-RA	27.0882	27.8699	27.4791
AAEL004648-RA	0.0374931	0	0.0187466
AAEL004685-RA	3.14255	5.51107	4.32681
AAEL004686-RA	25.4085	20.0002	22.7043
AAEL004688-RB	0.381115	2.01349	1.1973
AAEL004688-RC	2.97277	6.64266	4.80771
AAEL004688-RD	1.7343	6.17737	3.95583
AAEL004688-RE	1.66989	1.24159	1.45574
AAEL004688-RF	1.11645	0.813403	0.964927
AAEL004688-RG	0	1.43e-05	7.15e-06
AAEL004689-RA	0.508134	1.75099	1.12956
AAEL004689-RB	0	2.95e-09	1.475e-09
AAEL004689-RC	0	0	0
AAEL004689-RD	0	0.527606	0.263803
AAEL004689-RE	0	0.325203	0.162602
AAEL004689-RF	1.03001	1.17872	1.10437
AAEL004690-RB	0.203379	0.423449	0.313414
AAEL004690-RC	0	1.23172	0.61586
AAEL004691-RA	81.6125	128.663	105.138
AAEL004691-RB	0.112118	0.135314	0.123716
AAEL004692-RB	0.341271	0.614169	0.47772
AAEL004692-RC	0	0	0
AAEL004694-RA	0.320517	0	0.160258
AAEL004694-RB	0.0846555	0.0124569	0.0485562
AAEL004694-RC	0.00668949	3.59407	1.80038
AAEL004694-RD	0.00604126	0.966159	0.4861
AAEL004694-RE	0.00238018	0.912845	0.457613
AAEL004694-RF	1.20052	1.00619	1.10336
AAEL004694-RG	0.471038	0	0.235519
AAEL004694-RH	0	0	0
AAEL004696-RA	0	0	0
AAEL004697-RA	2.83181	3.72461	3.27821
AAEL004697-RB	5.4293	16.1698	10.7995
AAEL004697-RC	3.97645	6.95517	5.46581
AAEL004698-RA	0.214346	6.72131	3.46783
AAEL004699-RA	250.82	296.326	273.573
AAEL004700-RA	0	0.804644	0.402322
AAEL004700-RB	0	0.397568	0.198784
AAEL004700-RC	0	0.619613	0.309806
AAEL004700-RD	0	0.024687	0.0123435
AAEL004701-RA	0	1.01934	0.50967
AAEL004702-RA	6.10925	10.829	8.46913
AAEL004702-RB	0.390956	0.608487	0.499722
AAEL004703-RA	0	0.0396655	0.0198327
AAEL004705-RA	0	0	0
AAEL004707-RA	0	0.0667544	0.0333772
AAEL004809-RA	1.76465	8.53384	5.14924
AAEL004824-RB	0.0551474	0.587154	0.321151
AAEL004863-RB	0.34309	2.45229	1.39769
AAEL004865-RA	26.2764	77.9106	52.0935
AAEL004866-RA	12.8324	15.6493	14.2409
AAEL004867-RB	6.46691	5.65102	6.05897
AAEL004868-RA	3.11353	4.9469	4.03022
AAEL004869-RA	1.50684	13.8989	7.70287
AAEL004870-RA	31.4232	0.990221	16.2067
AAEL004872-RB	0.139972	0.0297323	0.0848522
AAEL004872-RC	0	0	0
AAEL004873-RA	5.08957	16.2204	10.655
AAEL004873-RB	1.41204	0	0.70602
AAEL004874-RA	1.33412	4.6291	2.98161
AAEL004874-RB	0.304705	0.279541	0.292123
AAEL004875-RA	0.00315681	3.42041	1.71178
AAEL004875-RB	0.521678	1.81675	1.16921
AAEL004875-RC	0.147945	0.698699	0.423322
AAEL004876-RA	0	0	0
AAEL004876-RB	0	0	0
AAEL004876-RC	0	0	0
AAEL004877-RA	1.25578	4.71038	2.98308
AAEL004879-RA	23.1953	28.4145	25.8049
AAEL004881-RB	0.0508403	3.34003	1.69544
AAEL004883-RB	0	0	0
AAEL004883-RC	0	0.27762	0.13881
AAEL004883-RD	0	0	0
AAEL004884-RA	3.87433	10.0944	6.98437
AAEL004885-RB	0.0696574	0.601981	0.335819
AAEL004889-RA	3.7727	8.37386	6.07328
AAEL004891-RB	1.80324	7.59138	4.69731
AAEL004892-RB	2.60383	10.1799	6.39187
AAEL005047-RA	0.713586	2.63912	1.67635
AAEL005048-RC	0	0	0
AAEL005048-RD	8.4573	11.4959	9.9766
AAEL005048-RE	2.22558	4.71486	3.47022
AAEL005049-RA	0	14.0631	7.03155
AAEL005052-RA	21.0804	26.55	23.8152
AAEL005052-RB	19.8944	25.8455	22.87
AAEL005053-RB	1.01474	2.22272	1.61873
AAEL005054-RA	35.9851	38.9613	37.4732
AAEL005058-RA	0.4206	0.690916	0.555758
AAEL005060-RB	0	0.200189	0.100095
AAEL005061-RA	2.20509	3.73361	2.96935
AAEL005064-RA	0.49218	15.7617	8.12694
AAEL005068-RA	3.00557	6.519	4.76229
AAEL005068-RB	0.5639	2.532	1.54795
AAEL005069-RA	75.2921	70.6486	72.9703
AAEL005070-RA	5.33869	10.1412	7.73994
AAEL005071-RA	1.37995	3.95524	2.66759
AAEL005071-RB	0	0.47265	0.236325
AAEL005071-RC	0	3.48739	1.74369
AAEL005071-RD	0	0.590813	0.295407
AAEL005072-RA	0.790818	0.236216	0.513517
AAEL005073-RB	0.0253903	0.148518	0.0869542
AAEL005073-RC	0.0253903	0.148518	0.0869542
AAEL005074-RB	0	0.46153	0.230765
AAEL005074-RC	0	0.291778	0.145889
AAEL005074-RD	0	0.0198627	0.00993135
AAEL005074-RE	1.06381	2.68495	1.87438
AAEL005074-RF	0	0.00287708	0.00143854
AAEL005074-RG	0	0	0
AAEL005075-RA	11.9282	10.4058	11.167
AAEL005076-RB	3.4e-08	0	1.7e-08
AAEL005076-RC	2.06e-06	9.52e-07	1.506e-06
AAEL005076-RD	0.0990193	0.063633	0.0813261
AAEL005079-RB	0	0	0
AAEL005079-RC	0.0325089	0.113812	0.0731605
AAEL005080-RA	6.41102	8.78459	7.5978
AAEL005084-RA	12.8948	28.7057	20.8002
AAEL005086-RA	0.368131	3.95207	2.1601
AAEL005086-RB	0	0.462925	0.231462
AAEL005160-RB	0	0	0
AAEL005160-RC	0.164598	0.730496	0.447547
AAEL005160-RD	0	0	0
AAEL005162-RA	38.6776	26.6531	32.6653
AAEL005162-RB	0	6.49511	3.24756
AAEL005163-RA	50.7234	35.1536	42.9385
AAEL005165-RD	38.1327	62.9081	50.5204
AAEL005165-RE	4.9836	3.63463	4.30912
AAEL005165-RF	25.0755	24.7381	24.9068
AAEL005165-RG	136.947	181.791	159.369
AAEL005169-RA	3.37789	8.51119	5.94454
AAEL005242-RA	0.59036	0.89931	0.744835
AAEL005243-RB	0.0401352	0.0872752	0.0637052
AAEL005247-RA	0	0	0
AAEL005247-RB	0	0.0956975	0.0478488
AAEL005254-RA	4.323	8.35813	6.34056
AAEL005261-RB	9.2612	14.7544	12.0078
AAEL005266-RC	13.6542	19.6648	16.6595
AAEL005266-RD	2928.58	2601.06	2764.82
AAEL005271-RB	2.43392	1.76328	2.0986
AAEL005271-RC	7.17032	9.21435	8.19233
AAEL005278-RA	0	0	0
AAEL005278-RB	0	0	0
AAEL005279-RA	1.71505	4.04488	2.87996
AAEL005281-RA	1.31697	6.66388	3.99043
AAEL005281-RB	0	0.221504	0.110752
AAEL005400-RA	2.12848	1.56709	1.84779
AAEL005400-RAA	0	0.235074	0.117537
AAEL005400-RAB	1.73629	2.05014	1.89321
AAEL005400-RAC	3.48068	3.08114	3.28091
AAEL005400-RAD	0	0.000148453	7.42265e-05
AAEL005400-RAE	0	0.425366	0.212683
AAEL005400-RB	17.106	27.9441	22.5251
AAEL005400-RC	1.9859	4.34511	3.16551
AAEL005400-RD	0.000669536	0.00254208	0.00160581
AAEL005400-RE	0	0	0
AAEL005400-RF	0	0	0
AAEL005400-RG	1.08996	0.485591	0.787775
AAEL005400-RH	0.598112	0.585695	0.591903
AAEL005400-RI	0	0.0375741	0.018787
AAEL005400-RJ	0.214361	0.382916	0.298638
AAEL005400-RK	6.28e-08	1.10545	0.552725
AAEL005400-RL	0.153827	0.00421968	0.0790233
AAEL005400-RM	0.843308	0.00518278	0.424245
AAEL005400-RN	1.76234	3.79986	2.7811
AAEL005400-RO	0.402685	0.280683	0.341684
AAEL005400-RP	0	0	0
AAEL005400-RQ	2.42666	1.83813	2.13239
AAEL005400-RR	0.0635491	0.33627	0.19991
AAEL005400-RS	0.00149839	0	0.000749195
AAEL005400-RT	0	0.0948509	0.0474255
AAEL005400-RU	0.107167	0.599221	0.353194
AAEL005400-RV	0	0.0673961	0.0336981
AAEL005400-RW	0	0	0
AAEL005400-RX	1.26357	0.959435	1.1115
AAEL005400-RY	0	0	0
AAEL005400-RZ	1.24426	1.26766	1.25596
AAEL005401-RA	469.123	340.384	404.754
AAEL005401-RB	2124.15	1666.25	1895.2
AAEL005402-RB	1.45467	4.20759	2.83113
AAEL005403-RA	1.47927	4.11296	2.79612
AAEL005405-RA	13.8557	19.7325	16.7941
AAEL005406-RA	3.03968	8.906	5.97284
AAEL005407-RD	2.98392	5.88786	4.43589
AAEL005407-RE	0.487863	3.16804	1.82795
AAEL005408-RA	7.18842	15.2582	11.2233
AAEL005409-RA	0	0.0460065	0.0230032
AAEL005410-RA	5.63882	15.1045	10.3717
AAEL005411-RA	31.0129	10.3066	20.6597
AAEL005411-RB	13.0865	4.40433	8.74541
AAEL005411-RC	0.677751	0.582249	0.63
AAEL005412-RA	0.024534	0.235962	0.130248
AAEL005412-RB	1.84863	1.17851	1.51357
AAEL005412-RC	0	0	0
AAEL005413-RB	15.9047	13.4168	14.6608
AAEL005414-RA	36.6505	33.7067	35.1786
AAEL005415-RA	6.87489	10.029	8.45195
AAEL005417-RA	1.39689	3.16668	2.28179
AAEL005417-RB	0.0850497	0	0.0425249
AAEL005419-RA	6.49156	10.3466	8.41908
AAEL005420-RA	1.16716	0.961889	1.06452
AAEL005422-RA	3.1153	20.4679	11.7916
AAEL005423-RA	0.722755	2.4741	1.59843
AAEL005423-RB	1.08e-07	0	5.4e-08
AAEL005425-RB	2.19579	6.71573	4.45576
AAEL005426-RA	2.88579	6.94576	4.91578
AAEL005428-RA	297.529	545.78	421.654
AAEL005429-RA	104.898	67.3857	86.1419
AAEL005429-RB	8.56047	5.94688	7.25368
AAEL005431-RA	0.40916	0.498812	0.453986
AAEL005432-RA	88.9254	101.655	95.2902
AAEL005432-RB	72.3329	64.1707	68.2518
AAEL005432-RC	6.2856	4.67684	5.48122
AAEL005437-RA	0	0	0
AAEL005437-RB	0	0	0
AAEL005438-RA	1.70809	4.31043	3.00926
AAEL005440-RC	0.135803	0.0335497	0.0846764
AAEL005440-RD	1.23e-05	5.5e-05	3.365e-05
AAEL005440-RE	0.00138227	0	0.000691135
AAEL005440-RF	0.0349225	0.198798	0.11686
AAEL005444-RB	0.399106	0.0452121	0.222159
AAEL005444-RC	0.376265	0.0081138	0.192189
AAEL005444-RD	1.55993	0	0.779965
AAEL005500-RA	13.8514	26.0469	19.9491
AAEL005500-RB	0.805569	1.63052	1.21804
AAEL005504-RC	3.97929	7.37297	5.67613
AAEL005507-RA	0	0	0
AAEL005507-RB	0.000999739	0	0.000499869
AAEL005507-RC	5.03e-07	0	2.515e-07
AAEL005507-RD	3.34e-06	0	1.67e-06
AAEL005507-RE	0.000149033	0	7.45165e-05
AAEL005507-RF	0.00417546	0.13904	0.0716077
AAEL005507-RG	0.0453997	0.286096	0.165748
AAEL005507-RH	0	0	0
AAEL005507-RI	0	0	0
AAEL005508-RA	83.8392	67.3653	75.6022
AAEL005510-RA	1.85143	6.18756	4.0195
AAEL005510-RB	0	0	0
AAEL005515-RF	0.00869447	0.372029	0.190362
AAEL005515-RG	37.8628	38.8171	38.34
AAEL005515-RH	55.3912	34.9723	45.1817
AAEL005515-RI	161.968	164.368	163.168
AAEL005515-RJ	3.65052	6.55141	5.10097
AAEL005515-RK	0	0	0
AAEL005515-RL	112.095	216.267	164.181
AAEL005515-RM	91.5775	108.04	99.8088
AAEL005518-RA	0.220625	0.584689	0.402657
AAEL005520-RC	3.4994	10.6843	7.09185
AAEL005520-RD	0.965061	1.45179	1.20843
AAEL005520-RE	7.82534	11.4953	9.66032
AAEL005521-RA	3.47385	12.6214	8.04763
AAEL005522-RB	14.1894	18.4714	16.3304
AAEL005524-RA	236.926	195.123	216.024
AAEL005524-RB	25.1549	20.5568	22.8559
AAEL005526-RB	0	1.19439	0.597195
AAEL005526-RC	1.93886	3.09884	2.51885
AAEL005526-RD	0.62024	0.63731	0.628775
AAEL005526-RE	0	0	0
AAEL005526-RF	8.64e-06	1.04344	0.521724
AAEL005527-RA	7.19531	11.6268	9.41105
AAEL005528-RA	4.24313	12.6572	8.45017
AAEL005528-RB	4.09856	4.48476	4.29166
AAEL005530-RA	0.231333	0.398354	0.314843
AAEL005531-RA	2.25827	2.65428	2.45627
AAEL005533-RB	0.553539	1.19665	0.875094
AAEL005552-RC	3.28138	1.67891	2.48014
AAEL005552-RD	8.07752	16.4651	12.2713
AAEL005602-RB	0.0168193	1.37154	0.69418
AAEL005606-RB	0	0.458038	0.229019
AAEL005606-RC	0.992535	0	0.496267
AAEL005615-RB	10.5579	11.3927	10.9753
AAEL005626-RB	2.52418	3.58459	3.05438
AAEL005628-RB	74.4086	72.172	73.2903
AAEL005629-RA	2938.08	2478.75	2708.41
AAEL005630-RA	0	0.0186129	0.00930645
AAEL005631-RB	2.94866	4.1335	3.54108
AAEL005633-RA	0.0138669	0.292366	0.153116
AAEL005634-RB	0	0.693177	0.346589
AAEL005634-RC	0.00740048	2.93568	1.47154
AAEL005634-RD	0	1.38475	0.692375
AAEL005634-RE	0	0.164417	0.0822085
AAEL005634-RF	0	0.167752	0.083876
AAEL005634-RG	0	0.434134	0.217067
AAEL005634-RH	0	0.940731	0.470365
AAEL005635-RA	26.107	30.0987	28.1029
AAEL005635-RB	1.97909	1.07906	1.52907
AAEL005638-RA	79.3509	103.956	91.6534
AAEL005639-RA	14.966	23.9069	19.4365
AAEL005714-RB	0	0	0
AAEL005714-RC	0	1.16e-05	5.8e-06
AAEL005714-RD	0	0	0
AAEL005714-RE	0	0.118621	0.0593105
AAEL005714-RF	0	0	0
AAEL005717-RA	1.64156	3.94421	2.79289
AAEL005719-RA	6.87625	9.72904	8.30265
AAEL005722-RB	3124.4	2870.81	2997.61
AAEL005726-RB	0.117957	0.17739	0.147674
AAEL005726-RC	0	0	0
AAEL005726-RD	1.54168	3.18368	2.36268
AAEL005726-RE	1.3455	3.08165	2.21357
AAEL005726-RF	0.493566	0	0.246783
AAEL005726-RG	0.429729	0	0.214865
AAEL005726-RH	8.06e-11	0	4.03e-11
AAEL005768-RA	0.142084	0.865277	0.50368
AAEL005770-RA	1.03306	1.02414	1.0286
AAEL005772-RA	3.90397	3.0026	3.45329
AAEL005773-RB	0.0997674	0.116766	0.108267
AAEL005774-RB	0	0.00813137	0.00406569
AAEL005774-RC	0	0.000118187	5.90935e-05
AAEL005774-RD	0.0733056	7.973	4.02315
AAEL005774-RE	0	0.455989	0.227994
AAEL005777-RA	0.196392	4.02576	2.11108
AAEL005777-RB	2.11e-09	0	1.055e-09
AAEL005777-RC	0	0.48889	0.244445
AAEL005777-RD	7.11e-09	0.250196	0.125098
AAEL005787-RA	0.213888	0.265447	0.239667
AAEL005789-RA	0.649714	1.10192	0.875817
AAEL005790-RA	24.811	10.9444	17.8777
AAEL005790-RB	0	6.27121	3.1356
AAEL005790-RC	0	3.28219	1.64109
AAEL005791-RB	0.0587392	3.11935	1.58904
AAEL005792-RA	0.022963	0.187867	0.105415
AAEL005793-RA	0	1.53e-09	7.65e-10
AAEL005793-RB	0.263939	0.456508	0.360224
AAEL005796-RA	3.33496	4.62155	3.97825
AAEL005796-RB	25.3481	37.5537	31.4509
AAEL005798-RA	93.6944	106.781	100.238
AAEL005799-RA	4.26e-08	0.000162939	8.14908e-05
AAEL005799-RB	15.375	13.2589	14.317
AAEL005802-RA	5.60993	16.1348	10.8724
AAEL005803-RB	0.460216	0.302596	0.381406
AAEL005803-RC	0	0	0
AAEL005808-RA	16.8143	25.9012	21.3577
AAEL005811-RA	8.2404	13.333	10.7867
AAEL005813-RB	1.65378	14.4307	8.04224
AAEL005816-RA	13.0928	15.5644	14.3286
AAEL005817-RA	2933.61	2595.26	2764.44
AAEL005819-RA	24.8022	31.1358	27.969
AAEL005822-RA	67.0897	48.5274	57.8085
AAEL005825-RA	7.39868	12.4462	9.92244
AAEL005826-RA	4.4345	23.4871	13.9608
AAEL005827-RB	0.445837	6.00664	3.22624
AAEL005829-RA	0.0723446	0.126806	0.0995753
AAEL005830-RA	42.5358	36.7224	39.6291
AAEL005831-RB	6.72554	8.41147	7.56851
AAEL005832-RA	13.8138	21.8085	17.8111
AAEL005832-RB	20.7728	45.7474	33.2601
AAEL005834-RA	0	0	0
AAEL005837-RA	1.13296	5.30115	3.21705
AAEL005837-RB	0	0.0338003	0.0169001
AAEL005838-RB	0.864994	5.17118	3.01809
AAEL005839-RA	3.50068	8.41179	5.95623
AAEL005839-RB	0.081204	0.120508	0.100856
AAEL005840-RB	0.0220809	0.025902	0.0239915
AAEL005840-RC	1.46795	0.516448	0.992199
AAEL005943-RB	1.23842	5.36974	3.30408
AAEL005944-RA	50.6414	34.8249	42.7331
AAEL005945-RB	0.193983	0.148767	0.171375
AAEL005946-RA	109.933	104.541	107.237
AAEL005947-RA	22.4887	28.4531	25.4709
AAEL005947-RB	11.8559	15.3046	13.5802
AAEL005950-RAA	0	0.0055869	0.00279345
AAEL005950-RAB	0	1.98e-08	9.9e-09
AAEL005950-RAC	0	0	0
AAEL005950-RD	0	0	0
AAEL005950-RE	0	0	0
AAEL005950-RF	0	0	0
AAEL005950-RG	0	0.574331	0.287166
AAEL005950-RH	0	0.0862496	0.0431248
AAEL005950-RI	0.0705614	0	0.0352807
AAEL005950-RJ	0	0	0
AAEL005950-RK	0	0	0
AAEL005950-RL	0	0	0
AAEL005950-RM	0	0	0
AAEL005950-RN	0.129266	0.690169	0.409718
AAEL005950-RO	4.18116	5.7591	4.97013
AAEL005950-RP	0	0	0
AAEL005950-RQ	0	0	0
AAEL005950-RR	2.42996	7.25502	4.84249
AAEL005950-RS	0	0	0
AAEL005950-RT	0.428069	0.814624	0.621347
AAEL005950-RU	0	0	0
AAEL005950-RV	0	0.0805274	0.0402637
AAEL005950-RW	0	0.359306	0.179653
AAEL005950-RX	0	0.000130624	6.5312e-05
AAEL005950-RY	0	0	0
AAEL005950-RZ	0	0	0
AAEL005951-RC	0	1.54401	0.772005
AAEL005951-RD	1.31618	36.6345	18.9753
AAEL005952-RB	0	0.180372	0.090186
AAEL005952-RC	0.00529712	0.00818535	0.00674123
AAEL005952-RD	0	2.12e-07	1.06e-07
AAEL005952-RE	0	0.00260174	0.00130087
AAEL005952-RF	4.22e-10	0.868373	0.434187
AAEL005992-RB	3.32885	12.7531	8.04097
AAEL006063-RA	2.43162	0	1.21581
AAEL006064-RA	0	0.0189843	0.00949215
AAEL006065-RA	30.3384	23.318	26.8282
AAEL006065-RB	0	0	0
AAEL006066-RA	17.1268	27.326	22.2264
AAEL006067-RA	2.77273	5.2034	3.98807
AAEL006069-RB	13.2703	33.8523	23.5613
AAEL006070-RA	89.2689	92.5765	90.9227
AAEL006071-RB	0	0.212281	0.10614
AAEL006071-RC	0	0.0676149	0.0338075
AAEL006071-RD	5.38e-11	0.00479832	0.00239916
AAEL006071-RE	0.0268592	1.52882	0.77784
AAEL006071-RF	0.0481035	0.0096945	0.028899
AAEL006071-RG	0.0359381	0	0.0179691
AAEL006071-RH	0	0.697116	0.348558
AAEL006071-RI	0.496304	0.107443	0.301874
AAEL006071-RJ	0.890124	0.196181	0.543153
AAEL006071-RK	0	6.7e-06	3.35e-06
AAEL006073-RA	0.25504	5.63894	2.94699
AAEL006075-RA	2.79637	4.30437	3.55037
AAEL006077-RA	0	0	0
AAEL006077-RB	0.0213643	0.00833481	0.0148496
AAEL006080-RA	1.51961	5.61953	3.56957
AAEL006087-RA	13.9835	19.4747	16.7291
AAEL006113-RA	119.6	13.4462	66.5231
AAEL006113-RB	0	0	0
AAEL006113-RC	0.448546	0.483214	0.46588
AAEL006113-RD	0	0.136093	0.0680465
AAEL006113-RE	0.0870591	0.357428	0.222244
AAEL006113-RF	0.0966007	0.624676	0.360638
AAEL006113-RG	0.149304	1.19464	0.671972
AAEL006113-RH	7.61608	1.34079	4.47844
AAEL006113-RI	12.8643	5.57597	9.22013
AAEL006113-RJ	0	0	0
AAEL006114-RB	0	0	0
AAEL006116-RB	1.27977	2.61454	1.94715
AAEL006118-RA	10.2935	9.55917	9.92633
AAEL006120-RB	0	0.000203459	0.000101729
AAEL006120-RC	0.533865	0.543991	0.538928
AAEL006120-RD	0	0.175214	0.087607
AAEL006120-RE	0	0.000313095	0.000156547
AAEL006120-RF	0	0.535344	0.267672
AAEL006157-RB	0.0264045	0.0205912	0.0234979
AAEL006158-RA	84.2018	110.181	97.1914
AAEL006159-RA	0	0	0
AAEL006160-RB	0	3e-05	1.5e-05
AAEL006160-RC	0	0.0176879	0.00884395
AAEL006160-RD	0	0.0760021	0.0380011
AAEL006161-RB	0.6602	1.17713	0.918665
AAEL006164-RA	0.237024	0.63326	0.435142
AAEL006166-RA	3.09592	8.70773	5.90182
AAEL006167-RB	0	0	0
AAEL006168-RA	0.166215	0.387664	0.27694
AAEL006169-RA	39.0056	69.0926	54.0491
AAEL006189-RA	3.24551	14.1134	8.67946
AAEL006191-RB	0	0.420305	0.210152
AAEL006191-RC	0.144281	0.0254405	0.0848607
AAEL006191-RD	0	0.142688	0.071344
AAEL006191-RE	0	4.76875	2.38437
AAEL006191-RF	0	0	0
AAEL006193-RA	8.17283	9.70416	8.93849
AAEL006193-RB	0.537263	1.47864	1.00795
AAEL006193-RC	0	0.60245	0.301225
AAEL006196-RA	42.8866	51.7333	47.31
AAEL006196-RB	2.5377	1.45419	1.99595
AAEL006196-RC	0	0	0
AAEL006196-RD	0.246954	0.655758	0.451356
AAEL006197-RA	0.160956	1.19595	0.678453
AAEL006202-RA	0	0	0
AAEL006208-RA	0.0774113	9.46783	4.77262
AAEL006209-RA	0.375151	8.10502	4.24009
AAEL006287-RA	0.106008	0.0936016	0.0998048
AAEL006293-RA	0	0	0
AAEL006293-RB	0	0	0
AAEL006293-RC	0	0	0
AAEL006293-RD	0.273027	0.0750809	0.174054
AAEL006294-RA	2.81604	9.18232	5.99918
AAEL006294-RB	0	0.287261	0.14363
AAEL006294-RC	1.89889	0.32825	1.11357
AAEL006362-RA	14.7872	20.1369	17.4621
AAEL006362-RB	0	0.296471	0.148235
AAEL006362-RC	0.106519	0.161561	0.13404
AAEL006362-RD	1.85535	1.47302	1.66419
AAEL006363-RC	0.271208	0.197152	0.23418
AAEL006363-RD	0	1.13e-09	5.65e-10
AAEL006363-RE	2.55492	8.58349	5.56921
AAEL006363-RF	1.06712	4.48352	2.77532
AAEL006363-RG	10.1401	9.01297	9.57653
AAEL006363-RH	0.524924	0.373661	0.449292
AAEL006364-RA	31.4737	45.6648	38.5692
AAEL006364-RB	0.0059924	2.72859	1.36729
AAEL006364-RC	6.88949	10.8087	8.8491
AAEL006364-RD	3.13451	7.55383	5.34417
AAEL006364-RE	8.06216	15.7661	11.9141
AAEL006365-RA	0	0.311279	0.155639
AAEL006367-RA	4.58232	10.544	7.56316
AAEL006368-RA	0	0	0
AAEL006370-RB	0.493608	1.47058	0.982094
AAEL006370-RC	0.338281	3.69166	2.01497
AAEL006372-RA	46.2963	163.399	104.848
AAEL006372-RB	10.8279	4.09218	7.46004
AAEL006372-RC	2.15729	18.1385	10.1479
AAEL006373-RB	9.39907	10.9117	10.1554
AAEL006374-RA	2.60559	7.03608	4.82083
AAEL006376-RA	4.67673	0.229185	2.45296
AAEL006377-RA	0.881938	3.60872	2.24533
AAEL006378-RA	0	0	0
AAEL006381-RA	3394.91	552.138	1973.52
AAEL006382-RA	1.63823	0.474372	1.0563
AAEL006382-RB	0	0.00229437	0.00114719
AAEL006383-RA	0.0351272	0.0819511	0.0585391
AAEL006384-RA	0.768849	1.84876	1.3088
AAEL006589-RA	0.801543	4.1396	2.47057
AAEL006589-RB	0.664325	0.886052	0.775189
AAEL006589-RC	0.311417	0.651847	0.481632
AAEL006589-RD	0.905983	2.14451	1.52525
AAEL006593-RB	5.57e-07	0	2.785e-07
AAEL006593-RC	0.139254	0.306682	0.222968
AAEL006597-RA	0.0988831	0.0577688	0.078326
AAEL006707-RA	1.0075	6.06067	3.53409
AAEL006708-RA	4.27693	4.81879	4.54786
AAEL006711-RA	0	1.89312	0.94656
AAEL006711-RB	0	0	0
AAEL006711-RC	0.390519	0.598184	0.494352
AAEL006711-RD	0	0	0
AAEL006711-RE	0.231646	0.135534	0.18359
AAEL006711-RF	0.375666	1.1941	0.784883
AAEL006711-RG	0	0	0
AAEL006711-RH	0.0683974	1.55859	0.813494
AAEL006711-RI	0	0.955398	0.477699
AAEL006711-RJ	3.96457	9.59281	6.77869
AAEL006712-RA	0.597243	17.0626	8.82992
AAEL006713-RA	17.168	25.3162	21.2421
AAEL006715-RA	0.472419	9.37949	4.92595
AAEL006817-RA	0	0	0
AAEL006818-RB	0	0.306763	0.153382
AAEL006819-RA	14.2011	12.8568	13.529
AAEL006820-RA	100.358	266.051	183.204
AAEL006822-RA	0.095501	0.0579946	0.0767478
AAEL006822-RB	0	0	0
AAEL006822-RC	0.260856	0.25461	0.257733
AAEL006822-RD	0.520163	0	0.260082
AAEL006822-RE	0.248406	0.183027	0.215716
AAEL006822-RF	0	0	0
AAEL006822-RG	0.000429732	0.140556	0.0704929
AAEL006822-RH	0.00786606	0.00443011	0.00614808
AAEL006822-RI	0.126072	0.0772039	0.101638
AAEL006822-RJ	0.0238433	0.0138854	0.0188644
AAEL006822-RK	3.66e-06	0.00285268	0.00142817
AAEL006822-RL	6.38e-05	0.0541777	0.0271208
AAEL006823-RA	112.236	45.9832	79.1096
AAEL006824-RA	0.968994	7.44978	4.20939
AAEL006825-RB	0.177483	0.22212	0.199802
AAEL006826-RB	0	0.137497	0.0687485
AAEL006826-RC	0	0	0
AAEL006826-RD	0	0	0
AAEL006827-RA	0	3.34117	1.67058
AAEL006827-RB	0.119478	2.34039	1.22993
AAEL006829-RA	27.3305	42.5047	34.9176
AAEL006830-RA	0	66.6095	33.3047
AAEL006832-RB	0.866433	0.678793	0.772613
AAEL006859-RA	26.4856	62.9494	44.7175
AAEL006860-RA	5101.3	4224.54	4662.92
AAEL006936-RC	0.552191	0.939873	0.746032
AAEL006936-RD	0	0.0303464	0.0151732
AAEL006936-RE	0	0	0
AAEL006936-RF	0	0	0
AAEL006936-RG	3.85e-09	3.89e-09	3.87e-09
AAEL006936-RH	0.498933	0.20383	0.351382
AAEL006937-RA	3.24847	9.26398	6.25623
AAEL006938-RA	4.49271	6.75963	5.62617
AAEL006944-RB	0	0	0
AAEL006944-RC	0	0.542662	0.271331
AAEL006947-RA	0.341627	0.684058	0.512843
AAEL006948-RB	0	0	0
AAEL006948-RC	0.681653	0.312931	0.497292
AAEL006948-RD	0.0824368	0.75262	0.417528
AAEL006948-RE	0.254773	0.858251	0.556512
AAEL006948-RF	0.098006	2.10488	1.10144
AAEL006948-RG	0	0	0
AAEL006948-RH	1.39042	2.86617	2.1283
AAEL006948-RI	0	0	0
AAEL006948-RJ	0.167442	0.225084	0.196263
AAEL006949-RA	1.11208	2.57094	1.84151
AAEL006949-RB	3.10188	8.53967	5.82077
AAEL006949-RC	0	0.0234978	0.0117489
AAEL006950-RA	1.75459	4.9235	3.33905
AAEL006951-RA	10.7777	9.96801	10.3729
AAEL006951-RB	5.55154	5.45431	5.50293
AAEL006951-RC	8.98383	11.8693	10.4266
AAEL006955-RB	0.00932964	0	0.00466482
AAEL006955-RC	0.00506919	0.257199	0.131134
AAEL006956-RA	2.64197	10.5651	6.60353
AAEL006956-RB	19.7503	24.808	22.2792
AAEL006957-RB	0.10678	0.429596	0.268188
AAEL006958-RB	1.0318	2.23583	1.63382
AAEL006958-RC	0.940125	2.0375	1.48881
AAEL006958-RD	0	0.403312	0.201656
AAEL006958-RE	0	0	0
AAEL007029-RA	22.8708	34.0017	28.4363
AAEL007029-RB	0	0	0
AAEL007029-RC	0	0	0
AAEL007029-RD	0	0	0
AAEL007029-RE	0	0.138394	0.069197
AAEL007029-RF	0	0	0
AAEL007029-RG	0.290285	0.647493	0.468889
AAEL007029-RH	0	0	0
AAEL007029-RI	0.113743	0.0806809	0.0972119
AAEL007029-RJ	0.114831	0.439969	0.2774
AAEL007029-RK	0	3.02e-10	1.51e-10
AAEL007029-RL	0.054272	0.286979	0.170625
AAEL007029-RM	1.17015	2.25704	1.71359
AAEL007029-RN	0.408112	0.187081	0.297596
AAEL007029-RO	0	0	0
AAEL007030-RA	101.305	17.6401	59.4726
AAEL007030-RB	225.556	40.6183	133.087
AAEL007030-RC	0.254756	2.58552	1.42014
AAEL007030-RD	5.76576	0.898139	3.33195
AAEL007034-RA	1.5487	4.77167	3.16019
AAEL007038-RB	2.34023	3.01536	2.67779
AAEL007039-RB	3.40907	6.60256	5.00582
AAEL007040-RA	0	0.571323	0.285662
AAEL007040-RB	0	0	0
AAEL007040-RC	0	0.112418	0.056209
AAEL007078-RA	97.7594	100.983	99.3712
AAEL007198-RA	0.062275	0.160075	0.111175
AAEL007202-RA	3.2165	7.66749	5.442
AAEL007203-RA	9.87639	11.3497	10.613
AAEL007205-RB	0.0343609	0.0344947	0.0344278
AAEL007205-RC	0	0	0
AAEL007209-RA	4.12378	12.648	8.38589
AAEL007211-RA	0.684838	4.76126	2.72305
AAEL007217-RA	0.446561	0.26006	0.35331
AAEL007248-RB	1.10763	7.00016	4.05389
AAEL007268-RB	0	0.348843	0.174422
AAEL007268-RC	0.165584	0	0.082792
AAEL007268-RD	0.00109361	0	0.000546805
AAEL007343-RA	6.66359	12.9156	9.7896
AAEL007383-RE	206.014	155.701	180.858
AAEL007383-RF	151.594	103.695	127.644
AAEL007383-RG	803.71	369.102	586.406
AAEL007385-RC	9.80026	4.02541	6.91283
AAEL007385-RD	6.35069	13.3455	9.8481
AAEL007385-RE	309.853	114.901	212.377
AAEL007385-RF	535.639	459.3	497.47
AAEL007386-RA	0.0798936	0.213436	0.146665
AAEL007387-RB	1.42834	3.14037	2.28435
AAEL007387-RC	2.35039	2.32899	2.33969
AAEL007388-RB	0	0.0835494	0.0417747
AAEL007388-RC	0.033691	0.133237	0.083464
AAEL007388-RD	1e-06	2.93e-06	1.965e-06
AAEL007389-RA	0.0541289	0	0.0270645
AAEL007455-RB	0	0.0200734	0.0100367
AAEL007456-RB	0.252171	3.15122	1.7017
AAEL007458-RB	0	3.65076	1.82538
AAEL007461-RB	0.775075	7.43612	4.1056
AAEL007464-RA	0.689378	3.29738	1.99338
AAEL007465-RB	3.49e-06	0	1.745e-06
AAEL007465-RC	0	0.164084	0.082042
AAEL007465-RD	0.324951	0.204873	0.264912
AAEL007468-RA	2.92525	10.886	6.90562
AAEL007469-RA	16.0939	25.9036	20.9988
AAEL007476-RB	3.33212	10.8183	7.07521
AAEL007480-RA	2.14417	4.11699	3.13058
AAEL007481-RA	4.28249	6.85726	5.56987
AAEL007482-RA	2.77001	8.22894	5.49948
AAEL007483-RB	0.118891	0.0994377	0.109164
AAEL007484-RA	42.0847	23.3002	32.6925
AAEL007484-RB	18.5014	21.1065	19.804
AAEL007487-RA	0.771664	3.31773	2.0447
AAEL007487-RB	0	0.253851	0.126925
AAEL007487-RC	0	0	0
AAEL007492-RA	8.42924	8.132	8.28062
AAEL007493-RA	0.303321	0.176195	0.239758
AAEL007494-RA	279.917	226.193	253.055
AAEL007495-RA	0.616983	0.719591	0.668287
AAEL007495-RB	0.10269	0.354223	0.228457
AAEL007500-RA	0.319642	0.117773	0.218707
AAEL007501-RA	27.6921	17.8719	22.782
AAEL007501-RB	22.1347	20.0092	21.072
AAEL007507-RA	0	0.0427246	0.0213623
AAEL007507-RB	0	0	0
AAEL007508-RA	0.0811477	0.359853	0.2205
AAEL007509-RA	4.7975	4.82245	4.80997
AAEL007509-RB	3.16246	2.74685	2.95465
AAEL007511-RB	0.0233948	0.341761	0.182578
AAEL007512-RA	3.72702	6.69775	5.21239
AAEL007514-RA	0	0	0
AAEL007514-RB	0	0.0759906	0.0379953
AAEL007518-RB	0.0142476	0	0.0071238
AAEL007518-RC	0	0.0366913	0.0183457
AAEL007518-RD	0	0	0
AAEL007518-RE	0.176944	0.372553	0.274749
AAEL007518-RF	0	0	0
AAEL007518-RG	0	0	0
AAEL007518-RH	0	0	0
AAEL007518-RI	0	0	0
AAEL007518-RJ	0.507239	0.406774	0.457006
AAEL007518-RK	0.000325682	0	0.000162841
AAEL007518-RL	0.307719	0.26303	0.285374
AAEL007518-RM	0.341848	0.460547	0.401197
AAEL007518-RN	0	0	0
AAEL007519-RA	0	0	0
AAEL007579-RA	0	0.0114798	0.0057399
AAEL007579-RB	0	0	0
AAEL007579-RC	0	5.03e-05	2.515e-05
AAEL007584-RA	0.0255355	55.9468	27.9862
AAEL007586-RA	7.54799	16.746	12.147
AAEL007587-RB	0.7604	0.538889	0.649644
AAEL007591-RA	17.5826	44.7061	31.1443
AAEL007592-RA	70.1084	196.017	133.063
AAEL007593-RA	0.177371	8.60513	4.39125
AAEL007595-RB	9.54457	22.1191	15.8318
AAEL007595-RC	0.178555	0.731768	0.455161
AAEL007595-RD	3.92363	5.96091	4.94227
AAEL007597-RA	0.337133	7.31024	3.82369
AAEL007597-RB	0.364874	3.21836	1.79162
AAEL007598-RA	0	0.0450156	0.0225078
AAEL007607-RA	0.171664	0.226613	0.199138
AAEL007615-RA	0	0	0
AAEL007619-RB	0.340089	0.805357	0.572723
AAEL007619-RC	0.0844404	0.422469	0.253455
AAEL007641-RB	0.0637059	0.0838577	0.0737818
AAEL007642-RA	0.364716	6.12255	3.24363
AAEL007642-RB	1.03359	0.0887608	0.561175
AAEL007644-RA	1.4203	4.08561	2.75296
AAEL007646-RB	0	0	0
AAEL007646-RC	0.110315	0.0382922	0.0743036
AAEL007646-RD	0	0	0
AAEL007646-RE	0	0	0
AAEL007646-RF	0	0	0
AAEL007647-RA	24.067	25.91	24.9885
AAEL007648-RA	0.029971	0	0.0149855
AAEL007650-RA	56.0839	64.296	60.19
AAEL007651-RA	3.56017	3.8664	3.71328
AAEL007651-RB	1.07975	5.25606	3.1679
AAEL007651-RC	0.202761	1.11735	0.660056
AAEL007651-RD	0.888081	1.04968	0.968881
AAEL007652-RA	0.613198	0.919672	0.766435
AAEL007653-RA	0.357742	10.0113	5.18452
AAEL007654-RA	0.938242	4.355	2.64662
AAEL007655-RA	19.9153	14.6596	17.2874
AAEL007656-RA	25.1815	25.314	25.2477
AAEL007657-RA	0.0106008	45.5113	22.761
AAEL007658-RB	0.418284	1.90011	1.1592
AAEL007658-RC	0	0	0
AAEL007658-RD	0	0	0
AAEL007658-RE	0	0.333602	0.166801
AAEL007658-RF	2.46e-05	8.9e-09	1.23045e-05
AAEL007658-RG	3.79069	0.742325	2.26651
AAEL007658-RH	0.0363995	0	0.0181998
AAEL007658-RI	1.53857	2.46478	2.00168
AAEL007658-RJ	0.51741	1.1544	0.835905
AAEL007658-RK	1.18872	0	0.59436
AAEL007658-RL	0.102143	0	0.0510715
AAEL007658-RM	0.400016	0.474248	0.437132
AAEL007658-RN	0	1.34265	0.671325
AAEL007658-RO	0	1.78e-06	8.9e-07
AAEL007658-RP	0.244557	0.113788	0.179173
AAEL007658-RQ	0.190273	0	0.0951365
AAEL007658-RR	0.00110491	0	0.000552455
AAEL007658-RS	0.000158389	0.381816	0.190987
AAEL007658-RT	0.237299	0.655774	0.446537
AAEL007658-RU	2.06e-05	0.661846	0.330933
AAEL007659-RA	1.34106	1.34918	1.34512
AAEL007660-RA	14.433	18.1633	16.2981
AAEL007661-RA	0.178471	3.12099	1.64973
AAEL007661-RB	2.23e-06	0.486035	0.243019
AAEL007662-RD	3.65013	3.5509	3.60051
AAEL007662-RE	0	0	0
AAEL007662-RF	2.95197	0	1.47599
AAEL007662-RG	0	1.21439	0.607195
AAEL007662-RH	5.27584	2.46909	3.87247
AAEL007662-RI	0.929373	4.84689	2.88813
AAEL007662-RJ	7.91591	19.8241	13.87
AAEL007662-RK	1.02036	0.577539	0.798949
AAEL007662-RL	5.14575	8.13752	6.64163
AAEL007662-RM	1.50289	5.94225	3.72257
AAEL007664-RB	0.00838123	0.408483	0.208432
AAEL007667-RA	0.0654301	0.172243	0.118837
AAEL007668-RA	35.9838	36.1631	36.0735
AAEL007741-RA	0.17392	0.173491	0.173706
AAEL007744-RA	1.384	4.03284	2.70842
AAEL007750-RA	2.76735	4.31176	3.53956
AAEL007752-RA	437.406	402.732	420.069
AAEL007754-RB	4.14837	6.35374	5.25106
AAEL007757-RA	0.182175	2.83556	1.50887
AAEL007758-RA	4.27981	23.2247	13.7523
AAEL007760-RA	22.1021	19.6237	20.8629
AAEL007762-RA	31.3589	24.4908	27.9248
AAEL007788-RB	5.53874	7.57149	6.55511
AAEL007789-RA	0.1203	0.0984036	0.109352
AAEL007790-RA	14.6241	15.3102	14.9672
AAEL007792-RB	15.8922	31.37	23.6311
AAEL007793-RA	0.00923574	0.205239	0.107237
AAEL007820-RC	20.4896	33.7489	27.1193
AAEL007822-RB	18.9113	22.6206	20.766
AAEL007824-RA	4113.82	3740.06	3926.94
AAEL007825-RB	7.00983	11.3477	9.17877
AAEL007830-RA	0.338046	0.15104	0.244543
AAEL007830-RB	0	0.815474	0.407737
AAEL007831-RA	0	0	0
AAEL007832-RB	0.118733	0.127037	0.122885
AAEL007835-RA	1.00382	4.06393	2.53388
AAEL007838-RB	0	0.290855	0.145427
AAEL007838-RC	0	0.0659105	0.0329552
AAEL007838-RD	1.96499	7.24811	4.60655
AAEL007839-RB	3.4748	9.71427	6.59454
AAEL007872-RB	0.734622	0.626115	0.680368
AAEL007892-RA	155.004	85.7767	120.39
AAEL007904-RA	5.79045	12.0084	8.89943
AAEL007915-RB	0	0	0
AAEL007915-RC	28.8333	33.7668	31.3001
AAEL007915-RD	0	0	0
AAEL007915-RE	1.39409	1.3446	1.36935
AAEL007915-RF	0	0	0
AAEL007915-RG	0.1642	0	0.0821
AAEL007915-RH	0.0221474	0	0.0110737
AAEL007915-RI	7.44884	6.29531	6.87207
AAEL007915-RJ	6.85843	2.96171	4.91007
AAEL007915-RK	4.94e-10	0	2.47e-10
AAEL007915-RL	4.41e-07	0.113832	0.0569162
AAEL007915-RM	0	0	0
AAEL007992-RA	0	7.9e-09	3.95e-09
AAEL007992-RB	9.32584	3.28197	6.3039
AAEL007993-RA	30.0937	11.9607	21.0272
AAEL008003-RA	0	0.0653791	0.0326895
AAEL008010-RB	0	0.0884625	0.0442312
AAEL008010-RC	0	0	0
AAEL008012-RB	0	0	0
AAEL008013-RA	0	0.0692003	0.0346002
AAEL008013-RB	0	0	0
AAEL008013-RC	0	0	0
AAEL008014-RA	0.16541	0.276147	0.220778
AAEL008015-RA	3.72966	16.66	10.1948
AAEL008017-RA	0.312278	0.575485	0.443882
AAEL008018-RA	0	0.05681	0.028405
AAEL008020-RA	4.82115	5.9267	5.37392
AAEL008021-RA	4.09158	5.88827	4.98993
AAEL008021-RB	0	0	0
AAEL008021-RC	0.618945	0	0.309472
AAEL008022-RA	3.00609	1.2179	2.11199
AAEL008024-RA	15.7511	4.25506	10.0031
AAEL008024-RB	2.2198	4.2257	3.22275
AAEL008024-RC	0.584254	0.455231	0.519742
AAEL008024-RD	7.61243	25.1111	16.3618
AAEL008025-RA	25.8358	36.2697	31.0527
AAEL008027-RB	0	0.0748164	0.0374082
AAEL008027-RC	1.08617	0.146252	0.616211
AAEL008027-RD	0.709698	4.45083	2.58026
AAEL008028-RA	99.336	28.2476	63.7918
AAEL008028-RB	0.350223	0.0600762	0.20515
AAEL008028-RC	0.182251	1.11731	0.64978
AAEL008029-RA	0	1.5755	0.78775
AAEL008029-RB	0	0.354488	0.177244
AAEL008029-RC	0	5.40348	2.70174
AAEL008029-RD	0	1.45965	0.729825
AAEL008031-RB	0.00163819	0.211952	0.106795
AAEL008031-RC	0	0.163749	0.0818745
AAEL008031-RD	0.00538	0	0.00269
AAEL008032-RA	0	0	0
AAEL008032-RB	0.0516724	0.0403354	0.0460039
AAEL008071-RB	0	4.64e-09	2.32e-09
[truncated: 32,478 more rows]

## Sheet: KallistoN1
Name	M1N2	M1N3	N1 Average
AAEL000016-RA	16.7903	33.9128	25.3515
AAEL000017-RA	0.796795	0.270794	0.533794
AAEL000017-RB	0	0.498855	0.249427
AAEL000024-RA	0	0	0
AAEL000024-RB	0	0	0
AAEL000024-RC	0	0.179941	0.0899705
AAEL000029-RB	0	0	0
AAEL000049-RA	1.77073	2.47145	2.12109
AAEL000049-RB	15.3431	0.49502	7.91906
AAEL000049-RC	0.00581998	10.5905	5.29816
AAEL000064-RA	0	8.9128	4.4564
AAEL000079-RB	0.0712698	3.69954	1.8854
AAEL000079-RC	0.0466947	7.49233	3.76951
AAEL000079-RD	0	2.61503	1.30751
AAEL000081-RB	22.3554	58.2396	40.2975
AAEL000084-RA	53.3176	52.1526	52.7351
AAEL000084-RB	0	8.81435	4.40717
AAEL000101-RA	2.97628	4.03354	3.50491
AAEL000102-RB	61.0805	65.2229	63.1517
AAEL000106-RA	4.81599	6.25767	5.53683
AAEL000107-RA	1.43914	7.66723	4.55319
AAEL000108-RA	0	0.21506	0.10753
AAEL000109-RA	9.74072	98.5983	54.1695
AAEL000111-RA	0.179108	4.77645	2.47778
AAEL000113-RA	0	0.109692	0.054846
AAEL000115-RA	12.7145	35.5998	24.1572
AAEL000116-RB	0.647667	3.6476	2.14763
AAEL000117-RA	0	0	0
AAEL000117-RB	0	0	0
AAEL000118-RA	5.06827	11.3855	8.22688
AAEL000119-RA	2.57988	2.74957	2.66472
AAEL000122-RA	1.39023	3.84777	2.619
AAEL000122-RB	1.42555	11.2855	6.35553
AAEL000123-RA	0	0.0214489	0.0107244
AAEL000124-RA	0	0	0
AAEL000126-RA	25.2193	28.6769	26.9481
AAEL000126-RB	0	0.00789132	0.00394566
AAEL000126-RC	7.95034	9.97242	8.96138
AAEL000127-RA	1.79866	4.2758	3.03723
AAEL000127-RB	1.03225	0	0.516125
AAEL000128-RB	0.241207	5.32724	2.78422
AAEL000128-RC	23.8956	26.8782	25.3869
AAEL000134-RA	0.241249	0.471008	0.356128
AAEL000137-RB	0	0.231108	0.115554
AAEL000137-RC	0	0.30351	0.151755
AAEL000137-RD	0.753745	1.55485	1.1543
AAEL000137-RE	0	0	0
AAEL000137-RF	0	0	0
AAEL000138-RA	135.323	137.519	136.421
AAEL000139-RA	0	0	0
AAEL000140-RA	3.47395	8.23385	5.8539
AAEL000140-RB	0	1.21351	0.606755
AAEL000143-RA	15.1394	23.7117	19.4256
AAEL000146-RA	11.4576	10.8577	11.1577
AAEL000147-RA	10.3644	19.6308	14.9976
AAEL000148-RA	1.40894	2.76515	2.08705
AAEL000149-RA	4.03937	16.5402	10.2898
AAEL000151-RB	0	0.104849	0.0524245
AAEL000152-RA	2.40489	0	1.20244
AAEL000154-RA	0.316834	5.94498	3.13091
AAEL000157-RA	1.49441	11.4779	6.48616
AAEL000219-RA	59.1806	90.3709	74.7758
AAEL000221-RA	4.57e-08	3.66975	1.83488
AAEL000221-RB	37.6332	112.152	74.8926
AAEL000223-RA	55.9218	57.7811	56.8514
AAEL000224-RA	0	0.115466	0.057733
AAEL000224-RB	0	0	0
AAEL000226-RA	2.7229	20.1652	11.444
AAEL000227-RA	5.00746	12.9874	8.99743
AAEL000229-RA	0	0.91053	0.455265
AAEL000230-RA	15.5131	14.8906	15.2019
AAEL000231-RA	19.7544	31.1433	25.4489
AAEL000234-RA	0.180822	0	0.090411
AAEL000234-RB	1.46e-06	0	7.3e-07
AAEL000234-RC	0.0998404	0	0.0499202
AAEL000234-RD	0.00327575	1.49376	0.748518
AAEL000234-RE	0	1.14084	0.57042
AAEL000234-RF	1.24e-08	0	6.2e-09
AAEL000234-RG	9.31835	6.48703	7.90269
AAEL000234-RH	3.35334	7.54295	5.44815
AAEL000234-RI	0	0	0
AAEL000234-RJ	0	0.85975	0.429875
AAEL000234-RK	0	0.512814	0.256407
AAEL000234-RL	0	0.206043	0.103022
AAEL000234-RM	0	0	0
AAEL000234-RN	0	0	0
AAEL000234-RO	0	1.34579	0.672895
AAEL000234-RP	0	0.315675	0.157837
AAEL000234-RQ	0.685718	0	0.342859
AAEL000234-RR	0	0.502768	0.251384
AAEL000235-RA	24.577	25.5826	25.0798
AAEL000238-RB	0	0	0
AAEL000238-RC	0	0	0
AAEL000238-RD	0	0	0
AAEL000239-RB	0.0450789	0.239586	0.142332
AAEL000240-RA	16.014	21.3068	18.6604
AAEL000240-RB	2.77178	3.87245	3.32212
AAEL000240-RC	0.731685	1.22577	0.978727
AAEL000241-RA	7.03463	13.1867	10.1107
AAEL000242-RA	0	0.0115961	0.00579805
AAEL000242-RB	0	0	0
AAEL000242-RC	0	0	0
AAEL000242-RD	0	0	0
AAEL000242-RE	0.220493	8.35872	4.28961
AAEL000242-RF	0	0.31945	0.159725
AAEL000243-RB	0.0045517	0.0438611	0.0242064
AAEL000244-RA	62.2802	59.9866	61.1334
AAEL000245-RA	19.4512	48.2833	33.8672
AAEL000246-RA	2.65e-05	5.65e-07	1.35325e-05
AAEL000246-RB	4.14e-08	0.171609	0.0858045
AAEL000246-RC	0.0321223	0	0.0160611
AAEL000246-RD	3.58e-05	0.164944	0.0824899
AAEL000246-RE	0	1.88753	0.943765
AAEL000246-RF	0	0	0
AAEL000246-RG	0.0909275	0	0.0454637
AAEL000247-RA	0	0.0154292	0.0077146
AAEL000247-RB	0	0.207555	0.103777
AAEL000248-RA	11.2094	19.0621	15.1358
AAEL000249-RA	0	0	0
AAEL000249-RB	0	0.206555	0.103277
AAEL000249-RC	0	0	0
AAEL000249-RD	0.234045	0	0.117023
AAEL000249-RE	0	0	0
AAEL000250-RB	0	0	0
AAEL000250-RC	0	0.0444813	0.0222407
AAEL000250-RD	0	0	0
AAEL000250-RE	0	0	0
AAEL000250-RF	0	0	0
AAEL000251-RA	0	0.0470842	0.0235421
AAEL000252-RA	0.0339872	0.0653714	0.0496793
AAEL000254-RB	7.93e-05	0.00100799	0.000543645
AAEL000254-RC	0	5.86e-10	2.93e-10
AAEL000254-RD	0.0255569	0.125927	0.075742
AAEL000255-RA	0.414281	1.85007	1.13218
AAEL000256-RA	0	0	0
AAEL000256-RB	0	0	0
AAEL000256-RC	0.33308	0.001666	0.167373
AAEL000256-RD	0	0	0
AAEL000256-RE	0	0.402419	0.20121
AAEL000257-RA	6.87667	20.0863	13.4815
AAEL000266-RB	0	0	0
AAEL000266-RC	0	0	0
AAEL000266-RD	0	0	0
AAEL000267-RA	0	0	0
AAEL000267-RB	0	9.21215	4.60607
AAEL000269-RA	1134.22	1546.59	1340.4
AAEL000271-RC	0.864831	2.94434	1.90459
AAEL000271-RD	5.27927	10.0439	7.66159
AAEL000271-RE	65.5317	31.4664	48.499
AAEL000281-RA	0.00137717	0.759249	0.380313
AAEL000281-RB	1.64622	5.39761	3.52191
AAEL000281-RC	0	0	0
AAEL000282-RB	1.60942	4.05357	2.83149
AAEL000283-RB	0	0	0
AAEL000284-RA	0	2.57029	1.28514
AAEL000284-RB	19.0826	28.8141	23.9483
AAEL000288-RA	1.37828	0.704593	1.04144
AAEL000288-RB	0	0	0
AAEL000288-RC	0	0	0
AAEL000288-RD	0	0	0
AAEL000288-RE	0	0	0
AAEL000288-RF	0	2.06569	1.03285
AAEL000288-RG	0	0	0
AAEL000288-RH	0	0	0
AAEL000293-RA	104.327	139.061	121.694
AAEL000304-RF	1.29483	3.36676	2.3308
AAEL000305-RA	0.478875	0.634948	0.556912
AAEL000308-RA	0.143698	0.0844494	0.114074
AAEL000308-RB	0	0	0
AAEL000308-RC	0	0	0
AAEL000308-RD	0	0	0
AAEL000308-RE	0	0	0
AAEL000308-RF	0	0	0
AAEL000308-RG	0	0	0
AAEL000311-RA	0	0	0
AAEL000311-RB	0.123479	0.970961	0.54722
AAEL000311-RC	0	0	0
AAEL000312-RA	0	0	0
AAEL000314-RB	42.2079	46.1476	44.1778
AAEL000315-RB	5.94257	6.70887	6.32572
AAEL000315-RC	0	1.14251	0.571255
AAEL000315-RD	0	1.84329	0.921645
AAEL000316-RA	0.0671214	1.38996	0.728541
AAEL000322-RA	7.62e-09	3.27878	1.63939
AAEL000322-RB	2.11731	0.788208	1.45276
AAEL000323-RA	0	0	0
AAEL000324-RB	0.462293	2.4668	1.46455
AAEL000327-RB	0	2.25785	1.12892
AAEL000327-RC	0	0	0
AAEL000328-RA	13.4703	29.7467	21.6085
AAEL000328-RB	10.8319	11.4705	11.1512
AAEL000328-RC	8.33e-06	4.12404	2.06202
AAEL000328-RD	34.5446	30.7433	32.644
AAEL000328-RE	8.25372	2.44563	5.34967
AAEL000329-RA	0	0.0868104	0.0434052
AAEL000330-RA	61.6596	41.9148	51.7872
AAEL000332-RA	14.971	19.1059	17.0384
AAEL000334-RB	0	0.124764	0.062382
AAEL000334-RC	0	0	0
AAEL000335-RA	0	41.6128	20.8064
AAEL000337-RA	2.95418	8.32811	5.64114
AAEL000341-RB	0	0.0863461	0.043173
AAEL000342-RB	0	0	0
AAEL000342-RC	0.222077	0.558434	0.390255
AAEL000342-RD	0	0	0
AAEL000342-RE	0.251074	1.1586	0.704837
AAEL000342-RF	2.7e-06	0	1.35e-06
AAEL000342-RG	0	0	0
AAEL000342-RH	0.590047	0	0.295023
AAEL000343-RC	1.64424	2.66198	2.15311
AAEL000343-RD	0.0528807	3.46171	1.7573
AAEL000343-RE	0.74041	7.76319	4.2518
AAEL000344-RA	0	0	0
AAEL000348-RB	0	0	0
AAEL000348-RC	0	1.70919	0.854595
AAEL000348-RD	0	1.52328	0.76164
AAEL000348-RE	0	1.18726	0.59363
AAEL000351-RB	0	0	0
AAEL000351-RC	0	0.0510326	0.0255163
AAEL000354-RA	0.0825672	2.54492	1.31374
AAEL000354-RB	0	0	0
AAEL000356-RB	1.08784	0.501797	0.794818
AAEL000359-RA	0	0.100917	0.0504585
AAEL000360-RA	0.533036	0.674386	0.603711
AAEL000362-RA	0	0	0
AAEL000362-RB	0	0	0
AAEL000362-RC	0	0	0
AAEL000362-RD	2.67325	6.0507	4.36198
AAEL000362-RE	7.23535	3.69309	5.46422
AAEL000362-RF	0	0	0
AAEL000370-RA	6.15249	8.80481	7.47865
AAEL000370-RB	20.2628	22.6576	21.4602
AAEL000370-RC	1.2e-07	1.25381	0.626905
AAEL000372-RA	25.0647	23.1423	24.1035
AAEL000377-RA	0	0	0
AAEL000378-RA	13.4178	19.6098	16.5138
AAEL000379-RA	0	0.431401	0.2157
AAEL000382-RA	0	0.0773805	0.0386903
AAEL000384-RB	0	0	0
AAEL000568-RB	38.1753	50.8721	44.5237
AAEL000571-RB	0	0	0
AAEL000571-RC	0.0214874	0.410364	0.215926
AAEL000576-RB	0.096623	0.113108	0.104866
AAEL000578-RA	0.824596	2.42429	1.62444
AAEL000579-RB	4.64075	11.7005	8.17062
AAEL000580-RA	0	0	0
AAEL000580-RB	0	0	0
AAEL000580-RC	0	0.0853421	0.0426711
AAEL000580-RD	0	0	0
AAEL000580-RE	0	0	0
AAEL000584-RA	0	11.7597	5.87985
AAEL000589-RA	2.58307	5.92971	4.25639
AAEL000589-RB	0	0	0
AAEL000589-RC	0.777608	3.15942	1.96851
AAEL000589-RD	0	0.252814	0.126407
AAEL000589-RE	5.78123	17.8847	11.833
AAEL000594-RA	11.6922	16.887	14.2896
AAEL000596-RB	0.0771873	0.971612	0.5244
AAEL000597-RB	0.197682	0.297002	0.247342
AAEL000599-RA	0.162341	0.210662	0.186501
AAEL000600-RA	0.942654	1.1011	1.02188
AAEL000600-RB	0	0	0
AAEL000600-RC	0	0	0
AAEL000603-RB	0	0.0219504	0.0109752
AAEL000604-RC	1.93942	14.296	8.11771
AAEL000605-RA	5.03944	8.64528	6.84236
AAEL000609-RA	0	0.14923	0.074615
AAEL000613-RA	0	0	0
AAEL000614-RB	0	0	0
AAEL000616-RB	0	0	0
AAEL000618-RB	0.505662	0.699225	0.602443
AAEL000622-RC	17.2858	35.7994	26.5426
AAEL000623-RA	0	0	0
AAEL000626-RA	0	0.289248	0.144624
AAEL000626-RB	45.628	36.403	41.0155
AAEL000626-RC	2.40262	1.60524	2.00393
AAEL000626-RD	26.5276	38.8027	32.6651
AAEL000628-RA	0	0	0
AAEL000629-RA	0	6.0476	3.0238
AAEL000630-RA	0	0.24841	0.124205
AAEL000630-RB	0	1.1e-06	5.5e-07
AAEL000631-RB	0	0	0
AAEL000679-RA	89.9633	174.229	132.096
AAEL000682-RA	6.38506	17.3727	11.8789
AAEL000683-RB	0.64756	0.012482	0.330021
AAEL000685-RA	0.574579	5.80334	3.18896
AAEL000686-RA	0	0	0
AAEL000687-RA	31.2286	28.6835	29.956
AAEL000689-RA	0	0	0
AAEL000690-RB	0	0.117345	0.0586725
AAEL000692-RA	4.39188	13.221	8.80644
AAEL000694-RB	0	0	0
AAEL000697-RB	0.927358	8.15164	4.5395
AAEL000697-RC	0	2.47165	1.23582
AAEL000697-RD	0	0.396424	0.198212
AAEL000698-RB	0	2.12555	1.06278
AAEL000698-RC	0	4.55e-09	2.275e-09
AAEL000699-RA	5.45804	12.3768	8.91742
AAEL000701-RA	30.222	26.9667	28.5943
AAEL000703-RA	26.3524	41.4792	33.9158
AAEL000704-RB	1.21172	0.000382765	0.606051
AAEL000704-RC	1.84e-09	0.901353	0.450677
AAEL000704-RD	0	0	0
AAEL000705-RA	0	0.144814	0.072407
AAEL000705-RB	0	0	0
AAEL000706-RA	58.6158	73.008	65.8119
AAEL000707-RA	7.00395	15.4864	11.2452
AAEL000708-RA	21.2567	33.3585	27.3076
AAEL000709-RB	41.9047	72.6525	57.2786
AAEL000709-RC	17.9345	20.2441	19.0893
AAEL000713-RA	4.29457	12.2002	8.24739
AAEL000713-RB	0	0.593813	0.296907
AAEL000713-RC	173.885	123.432	148.659
AAEL000713-RD	76.6763	77.1983	76.9373
AAEL000714-RA	0	0.24422	0.12211
AAEL000714-RB	0.0769743	0.320897	0.198936
AAEL000714-RC	0	0.00040896	0.00020448
AAEL000715-RA	0	0.0159805	0.00799025
AAEL000716-RA	67.1962	55.614	61.4051
AAEL000717-RB	0	0.00652278	0.00326139
AAEL000717-RC	0	9.55e-08	4.775e-08
AAEL000719-RB	1.5501	4.20295	2.87652
AAEL000719-RC	6.18768	11.1088	8.64824
AAEL000719-RD	0	0.132172	0.066086
AAEL000719-RE	0	0.140301	0.0701505
AAEL000719-RF	0	0	0
AAEL000719-RG	0	0	0
AAEL000719-RH	0.18319	0.221743	0.202466
AAEL000719-RI	0	0	0
AAEL000720-RA	10.4668	16.5549	13.5108
AAEL000721-RA	0	0.200253	0.100126
AAEL000721-RB	8.13669	8.43705	8.28687
AAEL000722-RD	0	0	0
AAEL000722-RE	2.83666	10.6073	6.72198
AAEL000722-RF	10.3517	6.9127	8.6322
AAEL000723-RB	0	0	0
AAEL000723-RC	0	0	0
AAEL000723-RD	0	0	0
AAEL000723-RE	0	0	0
AAEL000723-RF	0	0	0
AAEL000723-RG	0	0.201202	0.100601
AAEL000723-RH	0	0	0
AAEL000723-RI	0	0	0
AAEL000723-RJ	0	1.67e-05	8.35e-06
AAEL000723-RK	0	0	0
AAEL000724-RC	3.05077	9.78996	6.42037
AAEL000725-RB	0	0	0
AAEL000725-RC	0	0	0
AAEL000726-RA	0	0.397311	0.198656
AAEL000729-RB	4.17e-08	0	2.085e-08
AAEL000729-RC	4.06e-07	0	2.03e-07
AAEL000729-RD	0.000178435	0.0305169	0.0153477
AAEL000729-RE	0.00176303	0.235489	0.118626
AAEL000729-RF	0.0376362	0.134935	0.0862856
AAEL000730-RA	4.00573	18.1817	11.0937
AAEL000730-RB	1.91066	8.87565	5.39316
AAEL000732-RA	0	0.108659	0.0543295
AAEL000733-RA	0	0.0918471	0.0459236
AAEL000735-RA	4.79229	4.29202	4.54216
AAEL000739-RA	0	32.4306	16.2153
AAEL000744-RA	10.3254	18.1299	14.2277
AAEL000746-RA	42.2365	70.5548	56.3957
AAEL000747-RB	0	2.9064	1.4532
AAEL000747-RC	1.99e-07	0.000402942	0.00020157
AAEL000747-RD	3.59183	5.83882	4.71532
AAEL000748-RA	0.310947	0.0835752	0.197261
AAEL000750-RA	8.28561	19.902	14.0938
AAEL000751-RA	0	0.117917	0.0589585
AAEL000757-RB	84.7564	97.9718	91.3641
AAEL000757-RC	1.98415	4.11734	3.05075
AAEL000933-RA	0.709656	1.08491	0.897283
AAEL000944-RA	43.9553	57.2827	50.619
AAEL000944-RB	2.61684	4.84196	3.7294
AAEL000953-RB	12.6488	6.68887	9.66883
AAEL000953-RC	4.66583	8.92539	6.79561
AAEL000964-RA	7.34202	10.7999	9.07096
AAEL000980-RA	0.942486	1.52795	1.23522
AAEL000980-RB	0.100906	2.71143	1.40617
AAEL000982-RA	13.6256	15.7825	14.7041
AAEL000983-RA	3.17019	4.12662	3.6484
AAEL000983-RB	0	0.198152	0.099076
AAEL000983-RE	0	0.160335	0.0801675
AAEL000983-RF	8.62283	10.0973	9.36007
AAEL000983-RG	0	0	0
AAEL000983-RH	0.178128	0.775167	0.476648
AAEL000984-RB	0	2.24893	1.12447
AAEL000984-RC	0.685194	8.49191	4.58855
AAEL000984-RD	0	0.491971	0.245985
AAEL000984-RE	0	0.791009	0.395504
AAEL000985-RA	10.9258	13.3588	12.1423
AAEL000985-RB	0	0.522887	0.261443
AAEL000985-RC	1.75e-05	0.000158794	8.8147e-05
AAEL000985-RD	13.7707	13.9275	13.8491
AAEL000987-RA	4089.26	5476.1	4782.68
AAEL000993-RB	4.84872	7.95498	6.40185
AAEL000994-RA	7.41033	14.3648	10.8876
AAEL000994-RB	0	0	0
AAEL000994-RC	0	0.141896	0.070948
AAEL000994-RD	0	5.99e-09	2.995e-09
AAEL000994-RE	0.172185	0.0298514	0.101018
AAEL000994-RF	0.842266	0.580507	0.711386
AAEL000994-RG	0.46539	0.655116	0.560253
AAEL000994-RH	0	0	0
AAEL000994-RI	2.87361	6.45865	4.66613
AAEL000994-RJ	0	1.72283	0.861415
AAEL000994-RK	0.617575	0.317887	0.467731
AAEL000994-RL	1.00283	0.13325	0.56804
AAEL000994-RM	0	0	0
AAEL000994-RN	0.0448122	0.209462	0.127137
AAEL000994-RO	0	0	0
AAEL000997-RB	0.0953727	0	0.0476864
AAEL000999-RA	1.01489	15.0625	8.0387
AAEL001005-RA	276.707	400.981	338.844
AAEL001008-RA	5.79279	6.56233	6.17756
AAEL001009-RB	0.738888	22.7052	11.722
AAEL001010-RB	0	0.0128557	0.00642785
AAEL001041-RA	3.75387	3.11474	3.43431
AAEL001041-RB	18.0466	0.0420338	9.04432
AAEL001041-RC	0.6058	5.17e-05	0.302926
AAEL001041-RD	0	1.9405	0.97025
AAEL001041-RE	0	0.903112	0.451556
AAEL001041-RF	2.63203	2.82312	2.72757
AAEL001041-RG	3.514	3.20129	3.35764
AAEL001041-RH	0.672511	8.44629	4.5594
AAEL001041-RI	4.78843	1.76909	3.27876
AAEL001041-RJ	0	6.0728	3.0364
AAEL001041-RK	0	3.53918	1.76959
AAEL001041-RL	0	1.42527	0.712635
AAEL001041-RM	0	0	0
AAEL001041-RN	1.06197	1.85173	1.45685
AAEL001041-RO	1.97548	3.59544	2.78546
AAEL001041-RP	1.04e-08	3.97e-10	5.3985e-09
AAEL001041-RQ	0	1.39721	0.698605
AAEL001041-RR	1.12412	2.29143	1.70778
AAEL001041-RS	0.440965	0.243378	0.342172
AAEL001054-RB	0.510636	1.0117	0.761168
AAEL001057-RA	0	0	0
AAEL001059-RA	0.481706	0.0407334	0.26122
AAEL001060-RA	0.0235438	0.0797595	0.0516517
AAEL001060-RB	0	0	0
AAEL001060-RC	0	0.1425	0.07125
AAEL001061-RA	0	0	0
AAEL001061-RB	39.6536	157.18	98.4168
AAEL001061-RC	5.51611	35.2002	20.3582
AAEL001062-RB	7.37995	6.13198	6.75596
AAEL001063-RA	0	0	0
AAEL001065-RA	25.1471	19.7066	22.4269
AAEL001067-RA	0	0.536025	0.268012
AAEL001068-RA	0.129085	0.280882	0.204984
AAEL001071-RA	3.88762	3.90297	3.89529
AAEL001073-RA	0	0.0205171	0.0102585
AAEL001074-RB	0	0.88323	0.441615
AAEL001074-RC	0.0608422	0.0790277	0.0699349
AAEL001074-RD	0	1.40271	0.701355
AAEL001076-RB	0	4.17e-07	2.085e-07
AAEL001076-RC	6.69e-06	0.0316696	0.0158381
AAEL001076-RD	0.0337402	0	0.0168701
AAEL001076-RE	1.64e-08	0	8.2e-09
AAEL001076-RF	4.13e-10	0.0905353	0.0452677
AAEL001076-RG	0	0	0
AAEL001076-RH	0	0	0
AAEL001076-RI	1.06e-05	0	5.3e-06
AAEL001077-RA	0.479346	0.621925	0.550635
AAEL001080-RA	13.1031	11.2113	12.1572
AAEL001082-RA	2.01689	4.45946	3.23818
AAEL001084-RA	0	0.213234	0.106617
AAEL001085-RA	11.7858	2.27e-09	5.8929
AAEL001086-RB	1.63198	9.71327	5.67263
AAEL001087-RB	1.94175	3.59876	2.77026
AAEL001088-RB	0	0.354489	0.177244
AAEL001088-RC	4.40046	9.2789	6.83968
AAEL001089-RA	18.8609	35.5735	27.2172
AAEL001090-RA	0	2.33612	1.16806
AAEL001091-RA	15.2847	12.4938	13.8893
AAEL001092-RA	77.777	76.4727	77.1249
AAEL001094-RA	5.93069	10.608	8.26935
AAEL001094-RB	10.9757	12.1666	11.5711
AAEL001094-RC	0	2.12047	1.06024
AAEL001094-RD	3.00001	2.9e-09	1.50001
AAEL001095-RA	0.149979	0.84356	0.496769
AAEL001096-RA	0	0	0
AAEL001098-RA	1.61244	1.52258	1.56751
AAEL001099-RA	4.91475	15.4955	10.2051
AAEL001099-RB	0	0	0
AAEL001099-RC	0	0	0
AAEL001152-RB	14.8025	21.5425	18.1725
AAEL001154-RA	45.0687	59.7144	52.3915
AAEL001155-RA	1.75026	6.63671	4.19348
AAEL001156-RA	0	0.351003	0.175502
AAEL001156-RB	0	0.143168	0.071584
AAEL001159-RA	43.2819	65.9774	54.6296
AAEL001162-RA	0.0455807	3.4799	1.76274
AAEL001162-RB	2.47645	0	1.23822
AAEL001163-RA	0.589901	0.914311	0.752106
AAEL001164-RA	227.837	241.765	234.801
AAEL001166-RA	4.85936	14.5756	9.71748
AAEL001166-RB	0	2.24089	1.12044
AAEL001166-RC	4.2285	4.52233	4.37542
AAEL001167-RA	0	0	0
AAEL001167-RB	0	0	0
AAEL001167-RC	0	0	0
AAEL001167-RD	0.235345	0	0.117672
AAEL001167-RE	0	0	0
AAEL001167-RF	0	0	0
AAEL001167-RG	0	0	0
AAEL001167-RH	0	0	0
AAEL001167-RI	0	0.90254	0.45127
AAEL001167-RJ	0	0	0
AAEL001167-RK	0.431461	0	0.21573
AAEL001168-RB	0	0	0
AAEL001168-RC	0	0.0609306	0.0304653
AAEL001168-RD	0	0	0
AAEL001168-RE	1.76e-06	1.00724	0.503621
AAEL001168-RF	0.0484102	2.77e-10	0.0242051
AAEL001169-RA	22.9764	37.465	30.2207
AAEL001170-RA	4.83193	8.03841	6.43517
AAEL001171-RA	14.9273	35.262	25.0947
AAEL001172-RA	0	3.13716	1.56858
AAEL001172-RB	5.24585	0.288588	2.76722
AAEL001173-RA	2.25005	5.17261	3.71133
AAEL001173-RB	4.56e-10	1.2e-09	8.28e-10
AAEL001173-RC	2.27e-09	0.562181	0.281091
AAEL001175-RA	1.63545	9.32922	5.48233
AAEL001176-RA	40.3351	40.1122	40.2236
AAEL001176-RB	6.7807	11.559	9.16985
AAEL001177-RA	43.3164	41.384	42.3502
AAEL001178-RB	0	0.0747534	0.0373767
AAEL001181-RB	0	0.0198607	0.00993035
AAEL001182-RA	23.1795	25.6282	24.4038
AAEL001183-RA	7.26819	8.54339	7.90579
AAEL001184-RA	0	0	0
AAEL001184-RB	0	0	0
AAEL001184-RC	0	0	0
AAEL001184-RD	0	0	0
AAEL001184-RE	0.0302889	0.438543	0.234416
AAEL001184-RF	0	0.122324	0.061162
AAEL001185-RA	6.53029	7.48147	7.00588
AAEL001187-RA	12.7904	32.5251	22.6578
AAEL001189-RA	1.2064	1.32256	1.26448
AAEL001190-RA	24.6706	26.3541	25.5123
AAEL001191-RA	2.69078	3.6631	3.17694
AAEL001191-RB	4.37095	7.34666	5.85881
AAEL001191-RC	0	1.11393	0.556965
AAEL001191-RD	4.97805	0.630838	2.80444
AAEL001192-RB	0	3.72172	1.86086
AAEL001192-RC	3.54908	3.12361	3.33635
AAEL001194-RA	15.3606	27.1075	21.234
AAEL001195-RA	0.282783	0.376161	0.329472
AAEL001196-RB	0	0	0
AAEL001196-RC	0	0.00632709	0.00316354
AAEL001196-RD	0	0	0
AAEL001198-RA	6.5081	6.38042	6.44426
AAEL001198-RB	1.34758	2.36435	1.85596
AAEL001198-RC	1.27284	0.393979	0.83341
AAEL001199-RA	4.3547	10.1738	7.26425
AAEL001200-RA	2.30529	2.46039	2.38284
AAEL001200-RB	1.32074	1.52274	1.42174
AAEL001201-RB	11.4334	11.5405	11.487
AAEL001201-RC	0	2.84418	1.42209
AAEL001202-RA	3.8174	7.16041	5.4889
AAEL001203-RB	0.111618	0.331585	0.221602
AAEL001204-RA	75.0181	102.912	88.9651
AAEL001204-RB	1.43877	0.853164	1.14597
AAEL001204-RC	24.7686	22.284	23.5263
AAEL001205-RA	11.8551	19.2499	15.5525
AAEL001206-RB	19.9665	21.4964	20.7315
AAEL001206-RC	2.69833	0.285851	1.49209
AAEL001206-RD	3.59437	1.53249	2.56343
AAEL001206-RE	72.1517	109.089	90.6204
AAEL001207-RB	0.357637	0.892578	0.625107
AAEL001207-RC	0	0	0
AAEL001207-RD	0.079157	0	0.0395785
AAEL001207-RE	0	0.417986	0.208993
AAEL001208-RA	0	0	0
AAEL001208-RB	0	0	0
AAEL001208-RC	0	0	0
AAEL001208-RD	0	0	0
AAEL001208-RE	0.304173	0.67141	0.487791
AAEL001208-RF	0	0	0
AAEL001208-RG	0	0	0
AAEL001209-RA	2.16429	1.85303	2.00866
AAEL001209-RB	35.738	64.7822	50.2601
AAEL001209-RC	0.689789	5.47044	3.08011
AAEL001209-RD	0.00494342	2.22e-06	0.00247282
AAEL001209-RE	5.00126	7.78e-05	2.50067
AAEL001209-RF	18.1164	15.1205	16.6184
AAEL001210-RA	161.252	115.664	138.458
AAEL001211-RA	9.57255	22.8416	16.2071
AAEL001212-RA	11.4145	30.0777	20.7461
AAEL001215-RA	27.8441	40.256	34.05
AAEL001216-RA	104.245	194.219	149.232
AAEL001218-RA	60.4467	77.2035	68.8251
AAEL001219-RA	0	0	0
AAEL001219-RB	0	0	0
AAEL001220-RB	6.36729	3.40613	4.88671
AAEL001220-RC	6.13e-07	2.98159	1.4908
AAEL001221-RA	0	0	0
AAEL001223-RA	0.667968	5.34531	3.00664
AAEL001228-RA	0	0.0303355	0.0151678
AAEL001228-RB	0	0.0126207	0.00631035
AAEL001229-RA	0	0	0
AAEL001231-RB	0	0	0
AAEL001231-RC	0	0	0
AAEL001231-RD	0	0	0
AAEL001231-RE	0	0	0
AAEL001231-RF	0	0	0
AAEL001231-RG	0	0	0
AAEL001231-RH	0	0.073513	0.0367565
AAEL001231-RI	0	0	0
AAEL001231-RJ	0	0	0
AAEL001232-RA	0.682338	1.73015	1.20624
AAEL001232-RB	1.21258	1.67937	1.44598
AAEL001233-RA	0.0944668	0.135294	0.11488
AAEL001235-RA	6.17424	7.93486	7.05455
AAEL001236-RA	17.2708	22.7612	20.016
AAEL001237-RB	0	0	0
AAEL001238-RB	5.01828	7.70905	6.36367
AAEL001240-RB	0	0.0512176	0.0256088
AAEL001241-RA	0.108317	0.19585	0.152083
AAEL001242-RB	0	0.725888	0.362944
AAEL001242-RC	1.58536	4.8559	3.22063
AAEL001242-RD	0	1.73e-09	8.65e-10
AAEL001243-RB	1.46387	2.49416	1.97901
AAEL001243-RC	11.8355	5.96613	8.90081
AAEL001244-RB	11.203	18.0592	14.6311
AAEL001245-RB	0	9.93e-10	4.965e-10
AAEL001245-RC	0	0	0
AAEL001245-RD	0	0	0
AAEL001245-RE	0	0	0
AAEL001245-RF	0	0	0
AAEL001245-RG	0	4.8844	2.4422
AAEL001245-RH	0	0	0
AAEL001245-RI	0	0	0
AAEL001245-RJ	0	0.559916	0.279958
AAEL001245-RK	0	0	0
AAEL001245-RL	0	0	0
AAEL001245-RM	1.6433	1.78611	1.7147
AAEL001245-RN	0	0	0
AAEL001245-RO	0	0	0
AAEL001245-RP	0	0	0
AAEL001245-RQ	0	0	0
AAEL001245-RR	0	0	0
AAEL001245-RS	0	0	0
AAEL001245-RT	0	0.124471	0.0622355
AAEL001245-RU	0	1.79366	0.89683
AAEL001245-RV	0	1.42216	0.71108
AAEL001246-RA	4.05674	5.45377	4.75526
AAEL001247-RA	82.4466	135.264	108.855
AAEL001248-RA	0	0.109296	0.054648
AAEL001248-RB	0	0	0
AAEL001249-RA	2.29193	8.92282	5.60737
AAEL001250-RA	18.3874	29.9684	24.1779
AAEL001252-RA	0	0	0
AAEL001252-RB	2.55084	3.7689	3.15987
AAEL001252-RC	0.105369	0.807131	0.45625
AAEL001254-RA	1.16972	8.6449	4.90731
AAEL001254-RB	0	0.938572	0.469286
AAEL001254-RC	3.9145	3.05947	3.48698
AAEL001255-RB	15.9733	18.3106	17.142
AAEL001255-RC	9.10034	8.38786	8.7441
AAEL001256-RA	0	0.111716	0.055858
AAEL001257-RA	2.84066	6.90994	4.8753
AAEL001258-RA	0	0	0
AAEL001260-RA	3.05346	6.70468	4.87907
AAEL001261-RA	0.883738	3.95886	2.4213
AAEL001263-RA	0	0	0
AAEL001267-RA	0.0197224	0	0.0098612
AAEL001268-RB	0	0	0
AAEL001268-RC	0	0	0
AAEL001268-RD	0	0.627994	0.313997
AAEL001268-RE	0	0	0
AAEL001268-RF	0	0	0
AAEL001268-RG	2.85384	2.21489	2.53437
AAEL001268-RH	0	0.35908	0.17954
AAEL001268-RI	0	0	0
AAEL001268-RJ	0	0	0
AAEL001268-RK	0	0	0
AAEL001270-RB	8.90835	11.3252	10.1168
AAEL001271-RA	0	8.51855	4.25927
AAEL001271-RB	0	2.68e-08	1.34e-08
AAEL001273-RA	13.1555	23.8822	18.5189
AAEL001275-RA	16.073	18.2736	17.1733
AAEL001275-RB	34.1412	42.706	38.4236
AAEL001277-RB	0	0.661169	0.330585
AAEL001277-RC	19.5079	35.8321	27.67
AAEL001278-RA	0	0.379744	0.189872
AAEL001281-RB	0	0.0672845	0.0336422
AAEL001281-RC	4.96e-05	3.66e-05	4.31e-05
AAEL001281-RD	0.581	0.160991	0.370995
AAEL001281-RE	0	0.04045	0.020225
AAEL001281-RF	0.000367259	0.000219925	0.000293592
AAEL001281-RG	0	0	0
AAEL001281-RH	0	0.129186	0.064593
AAEL001281-RI	0	0	0
AAEL001281-RJ	0	0	0
AAEL001281-RK	0	0.21542	0.10771
AAEL001281-RL	0.0455356	0.0855046	0.0655201
AAEL001286-RA	0	0	0
AAEL001287-RA	0	0.324046	0.162023
AAEL001290-RA	0	0.0993441	0.0496721
AAEL001292-RA	0	0.0208399	0.01042
AAEL001293-RD	0.768831	3.38564	2.07724
AAEL001293-RE	12.8839	9.55663	11.2203
AAEL001294-RA	0	0.74181	0.370905
AAEL001295-RA	10.905	9.20184	10.0534
AAEL001301-RA	6.87067	16.1883	11.5295
AAEL001304-RA	0	0.176819	0.0884095
AAEL001304-RB	0	0	0
AAEL001304-RC	0.340948	0.635152	0.48805
AAEL001304-RD	0	0	0
AAEL001304-RE	0	0.473474	0.236737
AAEL001304-RF	0	0.426023	0.213011
AAEL001304-RG	0.000187049	8.03e-11	9.35245e-05
AAEL001304-RH	2.82783	4.0574	3.44261
AAEL001304-RI	3.52e-08	0	1.76e-08
AAEL001305-RA	0	0.306972	0.153486
AAEL001306-RA	0	3.40421	1.7021
AAEL001306-RB	1.60259	0.0645495	0.83357
AAEL001307-RA	16.8596	13.3098	15.0847
AAEL001308-RA	1.34378	8.17443	4.7591
AAEL001309-RA	0	0	0
AAEL001312-RA	23.7587	27.2162	25.4875
AAEL001315-RA	2.65174	14.4907	8.57122
AAEL001316-RA	0.2139	0.119783	0.166842
AAEL001318-RB	0	0	0
AAEL001319-RB	0	0.152136	0.076068
AAEL001320-RA	0.64344	0.840975	0.742208
AAEL001323-RA	0	0.581556	0.290778
AAEL001323-RB	0	0	0
AAEL001325-RA	0.648339	1.3242	0.98627
AAEL001326-RA	3.46517	5.27045	4.36781
AAEL001328-RA	0.00247991	0.676417	0.339448
AAEL001328-RB	0.0410701	0	0.020535
AAEL001333-RA	0	0.133887	0.0669435
AAEL001341-RA	14.5496	28.3835	21.4666
AAEL001343-RB	0.000160045	0.000451862	0.000305953
AAEL001343-RC	0.0492951	0.0721856	0.0607403
AAEL001346-RA	0	0	0
AAEL001346-RB	0	0	0
AAEL001346-RC	0	0.0528016	0.0264008
AAEL001351-RA	0.952847	4.48119	2.71702
AAEL001355-RA	0	1.29399	0.646995
AAEL001355-RB	0	0.17447	0.087235
AAEL001356-RA	64.9782	55.1667	60.0725
AAEL001356-RB	0.63338	0.983651	0.808516
AAEL001356-RC	14.0568	17.6588	15.8578
AAEL001358-RA	0.131179	0.829633	0.480406
AAEL001359-RA	1.36721	3.66072	2.51396
AAEL001360-RA	1.73524	2.58464	2.15994
AAEL001360-RB	9.92222	23.3491	16.6357
AAEL001360-RC	0	0	0
AAEL001360-RD	0	0	0
AAEL001360-RE	0.196381	0.251508	0.223944
AAEL001360-RF	4.87979	1.25441	3.0671
AAEL001360-RG	0	0	0
AAEL001360-RH	2.98078	24.881	13.9309
AAEL001360-RI	10.9901	4.77856	7.88433
AAEL001361-RB	3.44e-10	4.92561	2.46281
AAEL001361-RC	3.44e-10	2.65276	1.32638
AAEL001361-RD	7.27e-10	2.88e-05	1.44004e-05
AAEL001361-RE	1.33878	1.31569	1.32723
AAEL001361-RF	0	0.897384	0.448692
AAEL001361-RG	5.16833	9.01036	7.08934
AAEL001363-RA	14.8857	30.8448	22.8652
AAEL001364-RB	0	0.0252925	0.0126462
AAEL001364-RC	0	0	0
AAEL001366-RA	4.39382	11.2618	7.82781
AAEL001367-RB	7.75e-05	0	3.875e-05
AAEL001367-RC	0	0.423932	0.211966
AAEL001367-RD	0	0.00210562	0.00105281
AAEL001367-RE	0.704948	0	0.352474
AAEL001367-RF	0	1.12343	0.561715
AAEL001367-RG	5.46e-09	0.000748569	0.000374287
AAEL001368-RA	0.273545	0.247997	0.260771
AAEL001370-RA	0.254884	0.994185	0.624534
AAEL001371-RA	12.4625	17.3604	14.9114
AAEL001372-RA	8.03e-07	5.48448	2.74224
AAEL001372-RB	0.805792	9.12964	4.96772
AAEL001372-RC	4.01072	2.23293	3.12183
AAEL001373-RB	0.523689	0.316602	0.420145
AAEL001374-RA	0	0	0
AAEL001374-RB	0	0	0
AAEL001374-RC	0	0.112801	0.0564005
AAEL001378-RA	5.11865	11.3536	8.23612
AAEL001378-RB	0	0.319258	0.159629
AAEL001379-RA	4.61297	10.2663	7.43963
AAEL001381-RA	2.92932	5.41649	4.17291
AAEL001382-RB	20.5044	38.5063	29.5053
AAEL001385-RA	20.2891	33.529	26.9091
AAEL001385-RB	0	0	0
AAEL001387-RB	0	4.93e-08	2.465e-08
AAEL001387-RC	2.78e-08	0.44413	0.222065
AAEL001387-RD	0	6.19e-08	3.095e-08
AAEL001387-RE	0	9.73e-05	4.865e-05
AAEL001387-RF	9.46e-09	0.169906	0.084953
AAEL001387-RG	0	1e-07	5e-08
AAEL001387-RH	0.0494153	0.00682446	0.0281199
AAEL001387-RI	0	0	0
AAEL001387-RJ	0	1.72e-06	8.6e-07
AAEL001387-RK	2.18e-10	0.0776729	0.0388365
AAEL001387-RL	0.112168	0.679351	0.39576
AAEL001387-RM	0	6.65e-07	3.325e-07
AAEL001387-RN	1.00096	3.64181	2.32139
AAEL001387-RO	4.21e-09	2.25e-06	1.12711e-06
AAEL001389-RA	7.09265	8.50647	7.79956
AAEL001389-RB	1.4364	7.33626	4.38633
AAEL001389-RC	0.0208697	1.24538	0.633125
AAEL001389-RD	5.78326	12.0416	8.91243
AAEL001389-RE	0	0.0637725	0.0318862
AAEL001390-RA	1.14419	1.28375	1.21397
AAEL001391-RA	0	0.456491	0.228245
AAEL001392-RB	0	0.400805	0.200403
AAEL001394-RA	4.19965	4.09957	4.14961
AAEL001395-RB	4.73813	9.58602	7.16207
AAEL001396-RA	1.57548	4.60985	3.09266
AAEL001397-RA	6.04133	14.33	10.1857
AAEL001399-RA	1.29898	6.60898	3.95398
AAEL001400-RA	9.55724	7.41677	8.487
AAEL001401-RA	1.31919	3.87479	2.59699
AAEL001402-RA	0.341956	3.35226	1.84711
AAEL001403-RA	1.56176	2.62409	2.09293
AAEL001403-RB	0	0.344586	0.172293
AAEL001405-RA	9.02091	19.9107	14.4658
AAEL001407-RA	2.58979	12.1846	7.3872
AAEL001410-RA	1.50688	8.02527	4.76608
AAEL001411-RA	35.6472	61.5578	48.6025
AAEL001412-RB	13.8134	16.2075	15.0104
AAEL001414-RA	0	3.46865	1.73432
AAEL001414-RB	0.959847	0.799924	0.879885
AAEL001416-RA	4.7339	9.00231	6.8681
AAEL001416-RB	1.7573	4.08818	2.92274
AAEL001417-RA	0.164523	0.357543	0.261033
AAEL001420-RA	1.58728	8.20329	4.89529
AAEL001421-RA	7.62e-07	1.76763	0.883815
AAEL001421-RB	7.71731	43.2173	25.4673
AAEL001421-RC	83.7878	79.5614	81.6746
AAEL001422-RA	16.6357	29.1518	22.8938
AAEL001423-RA	35.7815	35.1261	35.4538
AAEL001423-RB	4.48153	4.95576	4.71865
AAEL001424-RB	7.69194	15.2719	11.4819
AAEL001425-RA	1.99296	13.1772	7.58508
AAEL001426-RA	3.94599	10.778	7.362
AAEL001426-RB	0	0	0
AAEL001427-RA	12.7749	13.9196	13.3473
AAEL001428-RB	0.0888886	0.80199	0.445439
AAEL001432-RA	103.553	133.53	118.541
AAEL001433-RB	0.851557	0.626625	0.739091
AAEL001433-RC	1.05e-07	0.536895	0.268448
AAEL001433-RD	0	0.350398	0.175199
AAEL001434-RA	0	6.79e-10	3.395e-10
AAEL001434-RB	0	0	0
AAEL001434-RC	0	0	0
AAEL001434-RD	3.21462	6.52277	4.8687
AAEL001434-RE	1.67413	0	0.837065
AAEL001434-RF	5.53773	8.46249	7.00011
AAEL001434-RG	3.63004	1.57907	2.60455
AAEL001434-RH	0	1.32263	0.661315
AAEL001434-RI	5.23629	8.77655	7.00642
AAEL001434-RJ	0	0.456604	0.228302
AAEL001434-RK	6.00108	0.0667829	3.03393
AAEL001434-RL	0.181907	8.17752	4.17971
AAEL001434-RM	4.36004	7.89814	6.12909
AAEL001434-RN	0	1.2586	0.6293
AAEL001435-RA	0	0.0125597	0.00627985
AAEL001437-RB	0	0	0
AAEL001437-RC	0	0	0
AAEL001437-RD	0	0.0738507	0.0369254
AAEL001437-RE	0.000549977	0	0.000274988
AAEL001437-RF	0.0857017	0	0.0428509
AAEL001437-RG	0	0	0
AAEL001438-RA	0.566078	0.926811	0.746444
AAEL001439-RA	32.1131	41.7074	36.9103
AAEL001442-RB	0.0369354	0.112265	0.0746002
AAEL001442-RC	0	0.000280583	0.000140291
AAEL001442-RD	0	0	0
AAEL001442-RE	8.52e-07	0	4.26e-07
AAEL001442-RF	0	0.384625	0.192312
AAEL001442-RG	0	0.0282795	0.0141397
AAEL001444-RB	0	0.0146098	0.0073049
AAEL001446-RB	5.42e-10	0	2.71e-10
AAEL001446-RC	0	1.8563	0.92815
AAEL001446-RD	3.19892	2.55153	2.87523
AAEL001446-RE	0	0	0
AAEL001446-RF	1.33481	0	0.667405
AAEL001446-RG	0	0	0
AAEL001446-RH	6.66967	2.96e-06	3.33484
AAEL001446-RI	0	8.72039	4.3602
AAEL001447-RA	0	0.697343	0.348672
AAEL001447-RB	0	0	0
AAEL001447-RC	0	0	0
AAEL001447-RD	0.529361	0.865965	0.697663
AAEL001447-RE	0	0.0947348	0.0473674
AAEL001447-RF	0	0	0
AAEL001447-RG	0	0.0552058	0.0276029
AAEL001447-RH	1.84496	7.78451	4.81473
AAEL001447-RI	1.12e-05	1.09152	0.545766
AAEL001448-RA	2.61191	0.288416	1.45016
AAEL001448-RB	0.35436	1.43642	0.89539
AAEL001448-RC	0	0	0
AAEL001448-RD	9.87771	8.39212	9.13491
AAEL001448-RE	1.9668	3.11608	2.54144
AAEL001448-RF	0	4.76523	2.38261
AAEL001448-RG	0	0	0
AAEL001448-RH	1.17e-07	1.65642	0.82821
AAEL001448-RI	1.14908	11.873	6.51104
AAEL001449-RA	0.166724	2.95681	1.56177
AAEL001449-RB	0	0	0
AAEL001451-RA	4.39898	7.25627	5.82762
AAEL001452-RA	0	0	0
AAEL001455-RB	0.579283	1.00707	0.793176
AAEL001455-RC	0	0	0
AAEL001455-RD	0	1.39506	0.69753
AAEL001455-RE	0.449995	0.151813	0.300904
AAEL001455-RF	0	0.260004	0.130002
AAEL001457-RA	0	0.0499796	0.0249898
AAEL001458-RB	0	0.264659	0.132329
AAEL001459-RA	0	0	0
AAEL001459-RB	0.448811	0.699371	0.574091
AAEL001461-RA	0	0.0469928	0.0234964
AAEL001463-RA	0	0.226356	0.113178
AAEL001464-RB	0.251202	0.151061	0.201131
AAEL001464-RC	0.282096	0.385312	0.333704
AAEL001464-RD	0	0.186883	0.0934415
AAEL001464-RE	0.220591	1.20489	0.71274
AAEL001464-RF	0.202361	0.485868	0.344114
AAEL001472-RA	0.828485	5.25073	3.03961
AAEL001473-RB	4.0006	2.57142	3.28601
AAEL001473-RC	0	2.30286	1.15143
AAEL001473-RD	0	4.98951	2.49476
AAEL001473-RE	0.406067	0.421083	0.413575
AAEL001473-RF	0	0	0
AAEL001474-RA	0	0.600859	0.30043
AAEL001475-RA	0.719999	0.969046	0.844522
AAEL001476-RA	0.243364	3.03057	1.63697
AAEL001476-RB	1.3599	2.48656	1.92323
AAEL001476-RC	0	0	0
AAEL001476-RD	0	0	0
AAEL001476-RE	2.86e-06	0.163858	0.0819304
AAEL001478-RB	3.69368	5.02786	4.36077
AAEL001479-RA	121.527	131.293	126.41
AAEL001480-RA	1.56488	1.00679	1.28584
AAEL001480-RB	1.94102	6.3973	4.16916
AAEL001480-RC	1.2e-05	1.12978	0.564896
AAEL001480-RD	2.12e-06	0	1.06e-06
AAEL001483-RA	0	0.0597363	0.0298681
AAEL001483-RB	0	0	0
AAEL001483-RC	0	0	0
AAEL001484-RC	28.5823	37.7495	33.1659
AAEL001484-RD	0.461399	0.347721	0.40456
AAEL001484-RE	13.8864	40.3815	27.134
AAEL001485-RA	0	0.843906	0.421953
AAEL001487-RB	0	0	0
AAEL001490-RA	1.22849	1.30919	1.26884
AAEL001491-RA	1.4285	0.646115	1.03731
AAEL001492-RA	0	0	0
AAEL001492-RB	0	0.135696	0.067848
AAEL001492-RC	0	0.479089	0.239544
AAEL001492-RD	0	0	0
AAEL001492-RE	0	0.255098	0.127549
AAEL001492-RF	0	0	0
AAEL001492-RG	0	0	0
AAEL001492-RH	0	1.87042	0.93521
AAEL001492-RI	0.847504	2.63255	1.74003
AAEL001492-RJ	0	0.000123004	6.1502e-05
AAEL001492-RK	0.0059368	0.0336245	0.0197807
AAEL001493-RB	0.145326	0	0.072663
AAEL001493-RC	0	1.56e-09	7.8e-10
AAEL001493-RD	0	0.0763209	0.0381604
AAEL001493-RE	0.339997	0.832695	0.586346
AAEL001494-RB	0	2.39e-09	1.195e-09
AAEL001494-RC	0	0.0977835	0.0488917
AAEL001495-RA	4.0457	66.0118	35.0287
AAEL001496-RA	0	0.180554	0.090277
AAEL001496-RB	17.9375	43.6942	30.8159
AAEL001497-RA	6.90799	8.44811	7.67805
AAEL001498-RA	8.07e-07	0	4.035e-07
AAEL001498-RB	0.176827	0.863769	0.520298
AAEL001500-RA	0.353875	0.583473	0.468674
AAEL001501-RA	38.3051	43.3631	40.8341
AAEL001503-RB	0	0	0
AAEL001503-RC	23.7505	28.193	25.9718
AAEL001503-RD	0	0	0
AAEL001503-RE	0.321791	0.225888	0.27384
AAEL001503-RF	0.349998	0.0681909	0.209094
AAEL001503-RG	0	0	0
AAEL001503-RH	0	0	0
AAEL001503-RI	0	0	0
AAEL001503-RJ	0	0	0
AAEL001503-RK	0	0	0
AAEL001503-RL	0	0	0
AAEL001503-RM	0	0.253335	0.126667
AAEL001503-RN	0	0	0
AAEL001503-RO	14.2405	14.0035	14.122
AAEL001503-RP	0	0	0
AAEL001503-RQ	0	0	0
AAEL001503-RR	7.88482	7.20492	7.54487
AAEL001503-RS	0	0	0
AAEL001505-RA	4.66951	8.07691	6.37321
AAEL001506-RA	11.0514	25.9488	18.5001
AAEL001540-RB	9.07812	20.3908	14.7345
AAEL001541-RA	14.7386	16.3688	15.5537
AAEL001541-RB	0	1.45136	0.72568
AAEL001541-RC	1.07191	9.35e-10	0.535955
AAEL001543-RB	0	1.81836	0.90918
AAEL001543-RC	0	0.458727	0.229363
AAEL001543-RD	9.75e-08	5.17e-07	3.0725e-07
AAEL001543-RE	2.17336	1.78424	1.9788
AAEL001544-RB	14.1762	20.4032	17.2897
AAEL001544-RC	5.42187	6.22847	5.82517
AAEL001545-RA	0	0	0
AAEL001545-RB	2.10366	2.42578	2.26472
AAEL001545-RC	0	0	0
AAEL001545-RD	0	1.99077	0.995385
AAEL001548-RA	55.3694	62.495	58.9322
AAEL001549-RB	1.46741	1.51492	1.49117
AAEL001549-RC	0	0	0
AAEL001549-RD	1.30173	0.603666	0.952698
AAEL001549-RE	0	0.23959	0.119795
AAEL001549-RF	0.837544	0.619715	0.72863
AAEL001549-RG	8.93393	24.1651	16.5495
AAEL001549-RH	0	0	0
AAEL001549-RI	0	0	0
AAEL001549-RJ	2.36559	5.47148	3.91853
AAEL001549-RK	0	0	0
AAEL001549-RL	0.214287	0.182962	0.198625
AAEL001549-RM	0	0	0
AAEL001552-RB	0	0	0
AAEL001553-RA	0	0	0
AAEL001554-RA	0	0.530967	0.265483
AAEL001554-RB	3.18168	8.27771	5.7297
AAEL001556-RA	0	8.19221	4.0961
AAEL001556-RB	7.76877	1.76094	4.76485
AAEL001556-RC	0	0.162944	0.081472
AAEL001556-RD	0	0.658841	0.329421
AAEL001557-RB	0	0.309408	0.154704
AAEL001557-RC	0	0.526523	0.263261
AAEL001557-RD	5.71794	14.6829	10.2004
AAEL001557-RE	6.98807	1.08e-09	3.49404
AAEL001557-RF	0	5.80045	2.90022
AAEL001557-RG	0	0.472525	0.236262
AAEL001557-RH	1.74208	2.08539	1.91373
AAEL001559-RA	0	6.51379	3.2569
AAEL001561-RE	6.01377	6.78596	6.39987
AAEL001561-RF	2.33997	3.99764	3.1688
AAEL001561-RG	2.1739	0.314183	1.24404
AAEL001561-RH	0.667847	2.26995	1.4689
AAEL001561-RI	2.46205	4.56026	3.51116
AAEL001561-RJ	1.15472	0.986719	1.07072
AAEL001561-RK	5.51163	1.91633	3.71398
AAEL001561-RL	15.9185	8.94141	12.43
AAEL001561-RM	4.09529	10.4012	7.24824
AAEL001561-RN	0.629072	0.733574	0.681323
AAEL001562-RA	7.26279	13.1672	10.215
AAEL001564-RB	1.95706	1.42381	1.69043
AAEL001564-RC	0	0	0
AAEL001564-RD	0.696655	5.87134	3.284
AAEL001565-RA	9.54681	7.54082	8.54382
AAEL001566-RA	0	1.07395	0.536975
AAEL001568-RB	3.06e-07	1.21e-06	7.58e-07
AAEL001568-RC	7.28e-05	0	3.64e-05
AAEL001568-RD	0.217737	0.143824	0.180781
AAEL001569-RA	20.068	38.1342	29.1011
AAEL001569-RB	2.92042	0	1.46021
AAEL001569-RC	0.00262134	1.34617	0.674396
AAEL001569-RD	0	0	0
AAEL001569-RE	8.42686	9.68669	9.05678
AAEL001569-RF	0	0	0
AAEL001569-RG	0	0.330848	0.165424
AAEL001569-RH	0	2.47563	1.23782
AAEL001570-RB	0.119235	0.543393	0.331314
AAEL001570-RC	0.789472	2.97271	1.88109
AAEL001571-RA	0	0	0
AAEL001571-RB	0	0	0
AAEL001571-RC	0	0	0
AAEL001571-RD	0	0	0
AAEL001571-RE	0	0	0
AAEL001571-RF	0	0.0344427	0.0172213
AAEL001573-RA	13.1828	17.4698	15.3263
AAEL001575-RA	0.113723	0.167266	0.140494
AAEL001577-RA	141.806	130.772	136.289
AAEL001580-RA	1.46402	10.7765	6.12026
AAEL001581-RA	23.3102	29.708	26.5091
AAEL001582-RB	8.12e-05	0.000173245	0.000127223
AAEL001582-RC	9.8e-08	0	4.9e-08
AAEL001582-RD	0	0	0
AAEL001582-RE	0.000668428	3.76e-08	0.000334233
AAEL001582-RF	0.582338	0.530597	0.556468
AAEL001583-RB	2.87822	5.84104	4.35963
AAEL001583-RC	0.686832	3.13739	1.91211
AAEL001583-RD	0	0	0
AAEL001583-RE	0.901319	0.742455	0.821887
AAEL001583-RF	0.161701	0.105641	0.133671
AAEL001584-RA	0.05254	0.0779993	0.0652696
AAEL001584-RB	0.000106807	0	5.34035e-05
AAEL001584-RC	0	0.14831	0.074155
AAEL001584-RD	0.00156089	0.00332716	0.00244402
AAEL001584-RE	0.00356689	0	0.00178345
AAEL001586-RC	3.27398	1.82596	2.54997
AAEL001586-RD	0.282751	2.76462	1.52369
AAEL001586-RE	3.87e-06	0	1.935e-06
AAEL001588-RA	59.0679	111.521	85.2944
AAEL001593-RA	7.08786	33.3881	20.238
AAEL001593-RB	5.35578	12.6257	8.99074
AAEL001593-RC	5.06254	20.2865	12.6745
AAEL001593-RD	24.9233	23.1478	24.0356
AAEL001593-RE	1.85257	2.51076	2.18166
AAEL001595-RB	0.00775242	4.79e-08	0.00387623
AAEL001595-RC	6.68e-07	0	3.34e-07
AAEL001595-RD	0	0	0
AAEL001595-RE	1.07473	2.20657	1.64065
AAEL001595-RF	0.685831	1.49139	1.08861
AAEL001596-RA	39.6497	38.5043	39.077
AAEL001597-RA	1.50901	2.59064	2.04983
AAEL001600-RA	0	0	0
AAEL001600-RB	0	1.75508	0.87754
AAEL001600-RC	1.62484	3.0703	2.34757
AAEL001601-RA	4.17045	9.74832	6.95938
AAEL001601-RB	5.42843	2.12454	3.77649
AAEL001601-RC	0	0.98061	0.490305
AAEL001601-RD	4.17045	9.74832	6.95938
AAEL001604-RB	0	0	0
AAEL001604-RC	1.82115	4.82395	3.32255
AAEL001605-RA	34.4872	63.6889	49.088
AAEL001605-RB	2.38201	2.68542	2.53371
AAEL001607-RA	0	2.02862	1.01431
AAEL001607-RB	29.3706	16.3827	22.8766
AAEL001610-RA	3.10175	3.60469	3.35322
AAEL001612-RA	0.444397	1.02732	0.735858
AAEL001615-RA	23.1646	49.6222	36.3934
AAEL001616-RA	0.654246	4.59883	2.62654
AAEL001616-RB	0.0937003	0.816151	0.454926
AAEL001616-RC	3.38663	3.50992	3.44827
AAEL001619-RA	11.4083	24.7458	18.077
AAEL001622-RA	11.4251	16.5462	13.9856
AAEL001622-RB	1.86026	6.55362	4.20694
AAEL001623-RA	206.766	251.574	229.17
AAEL001624-RA	1.7772	4.29793	3.03756
AAEL001625-RA	0	0.101449	0.0507245
AAEL001626-RA	6.69314	13.8183	10.2557
AAEL001627-RA	9.64078	8.31521	8.97799
AAEL001628-RA	0.286564	0.566733	0.426648
AAEL001631-RA	1.07624	5.68943	3.38284
AAEL001632-RB	0	0.0509253	0.0254626
AAEL001634-RA	0	0	0
AAEL001635-RA	3.01955	10.4217	6.72063
AAEL001636-RA	60.068	87.2641	73.666
AAEL001637-RB	0	0.0779282	0.0389641
AAEL001638-RA	6.49277	11.2118	8.85229
AAEL001639-RB	0	0	0
AAEL001639-RC	1.48392	3.11e-09	0.74196
AAEL001639-RD	0	0.997464	0.498732
AAEL001639-RE	0	0.43255	0.216275
AAEL001639-RF	0	0.000583862	0.000291931
AAEL001640-RA	0	0	0
AAEL001641-RA	0.0855031	14.4702	7.27785
AAEL001641-RB	5.3144	1.28252	3.29846
AAEL001642-RC	21.0395	37.456	29.2478
AAEL001642-RD	1.75613	5.99865	3.87739
AAEL001644-RA	0	1.34751	0.673755
AAEL001645-RA	1.12853	1.25111	1.18982
AAEL001646-RB	0	1.37807	0.689035
AAEL001646-RC	10.3202	11.4256	10.8729
AAEL001647-RB	1.34e-05	0.000999154	0.000506277
AAEL001647-RC	2.80823	6.6627	4.73546
AAEL001647-RD	0	1.45e-09	7.25e-10
AAEL001647-RE	1.97e-06	1.53894	0.769471
AAEL001649-RA	25.8295	29.716	27.7728
AAEL001650-RA	0	0.112756	0.056378
AAEL001651-RA	0	0.257331	0.128665
AAEL001651-RB	0	0.392218	0.196109
AAEL001651-RC	0.941877	2.08314	1.51251
AAEL001651-RD	0	2.89003	1.44501
AAEL001652-RB	0.269911	0.440242	0.355077
AAEL001653-RA	3.29542	11.7869	7.54116
AAEL001654-RA	0	0.20353	0.101765
AAEL001655-RA	0.706315	13.6731	7.18971
AAEL001656-RA	63.848	62.8165	63.3323
AAEL001656-RB	0.193235	4.05943	2.12633
AAEL001657-RB	6.0426	6.79676	6.41968
AAEL001658-RA	4.80163	4.48583	4.64373
AAEL001666-RA	0.0867499	28.0283	14.0575
AAEL001667-RA	17.5948	24.5164	21.0556
AAEL001670-RA	12.2176	19.3069	15.7622
AAEL001671-RA	0	0.154465	0.0772325
AAEL001672-RB	0	0	0
AAEL001673-RA	205.778	205.347	205.562
AAEL001674-RA	0.0513851	0.512742	0.282064
AAEL001675-RB	0	0	0
AAEL001675-RC	0	0	0
AAEL001675-RD	0	0	0
AAEL001675-RE	0	0	0
AAEL001677-RA	0	0	0
AAEL001680-RB	0	0.0904325	0.0452162
AAEL001682-RA	20.5987	20.7247	20.6617
AAEL001683-RA	0	0	0
AAEL001685-RA	0	0	0
AAEL001686-RA	0.637919	0.358816	0.498368
AAEL001687-RA	0.83689	1.88378	1.36034
AAEL001688-RA	1.89072	2.11381	2.00226
AAEL001688-RB	0.000110681	1.95704	0.978575
AAEL001688-RC	0.528389	6.98e-05	0.264229
AAEL001690-RA	125.054	84.6249	104.839
AAEL001691-RA	0.841921	3.50204	2.17198
AAEL001693-RA	51.7555	73.6984	62.727
AAEL001694-RA	0	0.0901045	0.0450523
AAEL001695-RA	0	0	0
AAEL001695-RB	0	0	0
AAEL001695-RC	0	0	0
AAEL001695-RD	0.162036	0.193172	0.177604
AAEL001696-RB	0.0136839	0.0155946	0.0146392
AAEL001696-RC	0.213731	0.151639	0.182685
AAEL001697-RB	0	0.0197104	0.0098552
AAEL001698-RA	30.7172	48.2671	39.4921
AAEL001698-RB	4.62301	3.00712	3.81506
AAEL001699-RA	0	0.635917	0.317958
AAEL001699-RB	0	2.71474	1.35737
AAEL001699-RC	1.63874	2.41986	2.0293
AAEL001699-RD	1.63874	2.41986	2.0293
AAEL001703-RA	113921	111789	112855
AAEL001704-RA	0	0	0
AAEL001705-RA	27.6466	34.4612	31.0539
AAEL001706-RA	24.2375	44.0253	34.1314
AAEL001707-RA	2.09049	1.36533	1.72791
AAEL001708-RA	0.47096	0.70985	0.590405
AAEL001709-RB	0	0	0
AAEL001709-RC	0	0.223051	0.111525
AAEL001709-RD	0	3.51502	1.75751
AAEL001709-RE	0	1.41345	0.706725
AAEL001709-RF	0	0	0
AAEL001709-RG	6.81411	11.8249	9.3195
AAEL001709-RH	0	0	0
AAEL001710-RB	0.198532	3.57304	1.88579
AAEL001713-RA	0	0	0
AAEL001714-RA	0	0	0
AAEL001715-RA	79.2644	122.842	101.053
AAEL001715-RB	28.793	41.004	34.8985
AAEL001716-RC	5.58497	10.6812	8.13309
AAEL001716-RD	0	1.56929	0.784645
AAEL001717-RA	2.03259	9.44678	5.73968
AAEL001719-RA	2.76588	4.606	3.68594
AAEL001724-RA	0.311269	1.23601	0.77364
AAEL001724-RB	1.23455	0.000267489	0.617409
AAEL001725-RA	3.69327	8.2082	5.95073
AAEL001725-RB	0	0.170439	0.0852195
AAEL001725-RC	0	0.639684	0.319842
AAEL001726-RA	0	0	0
AAEL001728-RA	0	0.0785856	0.0392928
AAEL001729-RA	5.65583	6.5028	6.07931
AAEL001730-RA	0	0	0
AAEL001732-RB	0	0.15271	0.076355
AAEL001734-RA	0.0560771	0.645198	0.350638
AAEL001734-RB	1.99e-05	0.209669	0.104844
AAEL001734-RC	0.0160902	0	0.0080451
AAEL001734-RD	0.0249303	5.48e-10	0.0124652
AAEL001735-RA	0	0.120318	0.060159
AAEL001736-RA	0	0	0
AAEL001737-RA	0	0.297657	0.148829
AAEL001738-RA	0	1.57195	0.785975
AAEL001738-RB	0.227843	0	0.113921
AAEL001738-RC	1.86605	0	0.933025
AAEL001738-RD	0	2.15553	1.07777
AAEL001738-RE	1.46689	0.240279	0.853584
AAEL001738-RF	0	2.15553	1.07777
AAEL001740-RA	5.95593	12.0514	9.00366
AAEL001742-RB	1.55266	2.6836	2.11813
AAEL001742-RC	3.06e-05	0.109822	0.0549263
AAEL001742-RD	3.82e-07	0.155235	0.0776177
AAEL001742-RE	0	1.6741	0.83705
AAEL001742-RF	2.08e-07	0.0898486	0.0449244
AAEL001742-RG	3.20611	0.14217	1.67414
AAEL001742-RH	0.144482	2.21051	1.1775
AAEL001742-RI	2.44743	0.0149205	1.23118
AAEL001742-RJ	0	1.74496	0.87248
AAEL001742-RK	1.46557	10.9883	6.22694
AAEL001742-RL	0	6.15e-08	3.075e-08
AAEL001743-RA	0	0	0
AAEL001744-RB	0	0.0801611	0.0400805
AAEL001745-RA	0	0.102715	0.0513575
AAEL001747-RB	0	0.173434	0.086717
AAEL001748-RA	2.96186	20.0048	11.4833
AAEL001749-RA	0.236299	5.10296	2.66963
AAEL001749-RB	0	0.290071	0.145036
AAEL001751-RA	1.54338	1.68195	1.61267
AAEL001751-RB	14.5182	21.6586	18.0884
AAEL001752-RB	10.4681	14.822	12.645
AAEL001754-RA	0	0.832306	0.416153
AAEL001756-RA	2.10594	3.72497	2.91545
AAEL001759-RA	3018.64	3038.11	3028.38
AAEL001761-RA	5.05749	10.4969	7.77719
AAEL001762-RB	0	0	0
AAEL001764-RA	8.07682	16.8993	12.4881
AAEL001765-RA	3.25811	6.43945	4.84878
AAEL001766-RB	0.294289	0.628394	0.461342
AAEL001766-RC	8.75e-09	1.33e-07	7.0875e-08
AAEL001767-RB	150.563	115.353	132.958
AAEL001767-RC	80.7072	83.6998	82.2035
AAEL001767-RD	14.664	27.6319	21.148
AAEL001769-RA	57.0888	74.7597	65.9243
AAEL001775-RA	3.77242	12.5845	8.17846
AAEL001776-RB	0	0.041296	0.020648
AAEL001776-RC	0	0.197146	0.098573
AAEL001776-RD	0	3.61e-09	1.805e-09
AAEL001776-RE	0	0	0
AAEL001776-RF	0	0	0
AAEL001778-RA	4.5759	12.6648	8.62035
AAEL001779-RA	135.3	156.623	145.962
AAEL001781-RA	0.0971026	1.69101	0.894056
AAEL001782-RB	2.8421	4.72023	3.78116
AAEL001787-RA	0	0	0
AAEL001787-RB	0	0	0
AAEL001787-RC	0	0	0
AAEL001787-RD	2.10316	3.75504	2.9291
AAEL001787-RE	0.537707	3.13251	1.83511
AAEL001789-RA	1.80238	2.81629	2.30933
AAEL001794-RB	0.342172	1.31259	0.827381
AAEL001795-RA	52.4186	34.4828	43.4507
AAEL001796-RA	3.11052	1.84307	2.4768
AAEL001796-RB	0	0	0
AAEL001796-RC	3.57511	4.37712	3.97612
AAEL001796-RD	1.95333	2.08278	2.01805
AAEL001796-RE	0	0.512648	0.256324
AAEL001797-RA	17.8088	19.3744	18.5916
AAEL001798-RA	1.83592	2.45432	2.14512
AAEL001798-RB	7.51e-05	0.000994907	0.000535003
AAEL001798-RC	0.476591	0.340561	0.408576
AAEL001798-RD	16.7756	29.4853	23.1304
AAEL001799-RA	0	0.048664	0.024332
AAEL001799-RB	0	0	0
AAEL001800-RA	16.0536	22.2502	19.1519
AAEL001800-RB	2.30122	6.139	4.22011
AAEL001801-RA	0	0	0
AAEL001803-RB	0	1.03e-09	5.15e-10
AAEL001803-RC	0.34615	0.921569	0.63386
AAEL001803-RD	0.000634335	9.57e-06	0.000321952
AAEL001803-RE	0.0026114	0.0112024	0.0069069
AAEL001803-RF	0.0324502	0.108856	0.0706531
AAEL001803-RG	0	0	0
AAEL001803-RH	0	0	0
AAEL001805-RA	5.91297	9.12928	7.52112
AAEL001807-RB	17.7374	13.8734	15.8054
AAEL001808-RB	0.831449	1.71774	1.27459
AAEL001808-RC	0.218982	0.630578	0.42478
AAEL001808-RD	1.03e-05	1.77674	0.888375
AAEL001809-RA	0	0	0
AAEL001809-RB	0	0	0
AAEL001809-RC	0	0	0
AAEL001809-RD	0	0.213707	0.106854
AAEL001810-RA	34.3213	54.3677	44.3445
AAEL001811-RA	5.79115	14.4167	10.1039
AAEL001812-RA	4.78378	7.80221	6.29299
AAEL001812-RB	1.09e-07	0.483666	0.241833
AAEL001812-RC	5.79e-07	0	2.895e-07
AAEL001812-RD	3.83771	2.95747	3.39759
AAEL001812-RE	0	0	0
AAEL001812-RF	0.34081	1.8692	1.10501
AAEL001812-RG	0	1.25973	0.629865
AAEL001812-RH	6.82342	2.71014	4.76678
AAEL001812-RI	7.33203	7.39597	7.364
AAEL001812-RJ	4.40936	6.09e-05	2.20471
AAEL001812-RK	9.64485	6.52878	8.08681
AAEL001813-RA	0.21936	0	0.10968
AAEL001813-RB	0	1.05294	0.52647
AAEL001813-RC	0.381798	0.50139	0.441594
AAEL001813-RD	9.62e-05	0	4.81e-05
AAEL001813-RE	0	0	0
AAEL001814-RA	0	0.143654	0.071827
AAEL001815-RA	0.65129	4.34237	2.49683
AAEL001816-RA	63.4089	41.8445	52.6267
AAEL001817-RA	0.156634	0.43597	0.296302
AAEL001818-RB	0	0.279871	0.139935
AAEL001818-RC	4.19391	3.16792	3.68091
AAEL001819-RA	0	4.19446	2.09723
AAEL001819-RB	0.819064	3.58509	2.20208
AAEL001820-RA	0.279594	0.0669989	0.173296
AAEL001821-RA	0	0.026423	0.0132115
AAEL001821-RB	0	0.000168307	8.41535e-05
AAEL001822-RA	0	0	0
AAEL001826-RA	0	0	0
AAEL001827-RA	2.84273	6.52371	4.68322
AAEL001830-RA	33.3573	30.8391	32.0982
AAEL001831-RA	47.6926	78.893	63.2928
AAEL001832-RA	1.47793	4.50633	2.99213
AAEL001833-RA	11.0804	16.3586	13.7195
AAEL001835-RA	0.123186	0.8791	0.501143
AAEL001836-RA	0	0.198119	0.0990595
AAEL001837-RA	339.749	347.053	343.401
AAEL001838-RA	24.5014	98.6489	61.5752
AAEL001839-RA	13.4951	4.05105	8.77308
AAEL001840-RA	30.0565	36.0936	33.0751
AAEL001843-RB	0	0.198812	0.099406
AAEL001843-RC	0.00223578	2.38457	1.1934
AAEL001843-RD	0	0.455626	0.227813
AAEL001843-RE	4.42e-06	0.000746475	0.000375448
AAEL001843-RF	0.132289	2.87e-07	0.0661446
AAEL001843-RG	1.44043	0.255525	0.847978
AAEL001843-RH	0.0335407	2.98115	1.50735
AAEL001843-RI	0	0.277522	0.138761
AAEL001843-RJ	0	0	0
AAEL001844-RA	14.126	15.0784	14.6022
AAEL001845-RB	22.5895	32.4733	27.5314
AAEL001846-RB	0.345994	0.0691881	0.207591
AAEL001847-RA	7.93982	17.2791	12.6095
AAEL001847-RB	6.87402	13.8912	10.3826
AAEL001850-RC	15.56	1.61943	8.58971
AAEL001850-RD	0.228187	2.4897	1.35894
AAEL001850-RE	0	5.77535	2.88768
AAEL001850-RF	0	9.51864	4.75932
AAEL001851-RA	18.5205	19.3867	18.9536
AAEL001851-RB	1.07365	0.87754	0.975595
AAEL001851-RC	2.80804	4.70167	3.75486
AAEL001852-RB	67.5688	88.714	78.1414
AAEL001853-RA	11.2299	20.2427	15.7363
AAEL001855-RA	0.293005	0.421586	0.357295
AAEL001856-RA	5.19882	13.9064	9.55261
AAEL001857-RA	0	0.0681488	0.0340744
AAEL001859-RA	14.4109	18.5167	16.4638
AAEL001860-RA	0	0	0
AAEL001863-RA	20098.3	14699.1	17398.7
AAEL001864-RA	187.215	167.125	177.17
AAEL001865-RA	163.759	164.773	164.266
AAEL001867-RA	0.14152	0	0.07076
AAEL001869-RA	28.2452	51.6695	39.9573
AAEL001869-RB	11.1459	14.1231	12.6345
AAEL001871-RA	3.94123	8.47255	6.20689
AAEL001874-RA	12.7959	22.2462	17.5211
AAEL001875-RB	1.88141	5.39211	3.63676
AAEL001876-RA	5.17936	16.6527	10.916
AAEL001876-RB	0	0.672491	0.336245
AAEL001877-RA	0	0.157991	0.0789955
AAEL001877-RB	0	0.130343	0.0651715
AAEL001878-RB	0.673137	0.63254	0.652838
AAEL001878-RC	0	1.30628	0.65314
AAEL001878-RD	0	1.19e-08	5.95e-09
AAEL001878-RE	0	0	0
AAEL001878-RF	0	0.0457155	0.0228577
AAEL001879-RA	11.2503	24.2402	17.7452
AAEL001881-RA	3.35741	2.92917	3.14329
AAEL001882-RA	0	0.239093	0.119546
AAEL001883-RA	3.44835	5.04585	4.2471
AAEL001886-RB	1.11903	4.22239	2.67071
AAEL001887-RC	1.01564	5.48478	3.25021
AAEL001887-RD	4.72896	9.36935	7.04916
AAEL001888-RC	2.23962	0.912493	1.57606
AAEL001888-RD	1.21e-06	0	6.05e-07
AAEL001888-RE	0.267121	0.634942	0.451032
AAEL001888-RF	0	0	0
AAEL001888-RG	0	0.123409	0.0617045
AAEL001889-RA	0	0.919034	0.459517
AAEL001891-RA	1.23646	2.41882	1.82764
AAEL001891-RB	0	1.82211	0.911055
AAEL001891-RC	1.62818	0	0.81409
AAEL001893-RA	1.03358	1.12521	1.07939
AAEL001894-RA	0.140231	0.223103	0.181667
AAEL001895-RA	0	0	0
AAEL001896-RA	67.603	91.0565	79.3297
AAEL001896-RB	46.3781	72.9233	59.6507
AAEL001897-RA	0	6.36153	3.18077
AAEL001898-RB	18.9259	15.356	17.141
AAEL001898-RC	0	0	0
AAEL001898-RD	0.510576	4.91523	2.7129
AAEL001898-RE	0	0	0
AAEL001898-RF	0	6.31843	3.15922
AAEL001898-RG	14.1585	26.439	20.2987
AAEL001898-RH	4.98241	18.8968	11.9396
AAEL001899-RA	0.426957	0.498356	0.462657
AAEL001900-RA	26.4763	29.2065	27.8414
AAEL001901-RB	0	0.0343353	0.0171676
AAEL001902-RA	0	1.3605	0.68025
AAEL001902-RB	1.56913	1.69913	1.63413
AAEL001902-RC	0	0	0
AAEL001903-RB	0	0.0566155	0.0283077
AAEL001904-RA	18.7946	33.7592	26.2769
AAEL001905-RA	0.147996	0.810941	0.479469
AAEL001906-RA	16.3682	19.4122	17.8902
AAEL001909-RA	72.638	64.2458	68.4419
AAEL001910-RA	5.92299	16.2229	11.0729
AAEL001911-RA	0	0	0
AAEL001912-RA	0.105962	0.127946	0.116954
AAEL001913-RA	149.784	201.546	175.665
AAEL001914-RA	0.010423	0.852002	0.431212
AAEL001914-RB	3.23985	3.90202	3.57093
AAEL001914-RC	0.00118484	0.510731	0.255958
AAEL001914-RD	0	0	0
AAEL001915-RB	0.320852	0.527547	0.4242
AAEL001915-RC	0.00229765	2.55e-06	0.0011501
AAEL001915-RD	2.89e-06	6.33e-09	1.44816e-06
AAEL001915-RE	2.27271	1.90654	2.08962
AAEL001915-RF	0	1.42623	0.713115
AAEL001915-RG	0.0016113	0.00286433	0.00223781
AAEL001916-RA	22.9021	24.2762	23.5892
AAEL001916-RB	59.9179	107.417	83.6675
AAEL001917-RA	39.4626	76.8878	58.1752
AAEL001919-RC	1.79619	6.43323	4.11471
AAEL001919-RD	2.61757	4.02304	3.32031
AAEL001919-RE	2.18135	5.26913	3.72524
AAEL001922-RB	0.118356	6.41477	3.26656
AAEL001925-RB	0.101407	8.78e-06	0.0507079
AAEL001925-RC	0.46639	2.48959	1.47799
AAEL001929-RA	0	0.058418	0.029209
AAEL001930-RC	0	32.3141	16.1571
AAEL001930-RD	28.9025	3.06295	15.9827
AAEL001931-RA	13.7208	11.9281	12.8245
AAEL001932-RA	2.1356	5.22243	3.67902
AAEL001934-RB	1.45489	2.76563	2.11026
AAEL001935-RA	4.76842	11.1292	7.94881
AAEL001940-RA	0	1.49788	0.74894
AAEL001940-RB	0	3.25063	1.62532
AAEL001940-RC	0	1.12479	0.562395
AAEL001940-RD	0	1.15155	0.575775
AAEL001940-RE	0.481052	1.39644	0.938746
AAEL001940-RF	2.70179	0	1.35089
AAEL001943-RA	24.6124	31.4346	28.0235
AAEL001946-RA	5.00531	7.76323	6.38427
AAEL001946-RB	5.64695	10.5316	8.08928
AAEL001946-RC	1.60123	1.0685	1.33486
AAEL001946-RD	0.921782	0.84503	0.883406
AAEL001954-RA	4.56752	8.32966	6.44859
AAEL001958-RA	0	0	0
AAEL001958-RB	0	9.68428	4.84214
AAEL001959-RA	55.1156	56.7422	55.9289
AAEL001960-RA	152.305	135.66	143.983
AAEL001960-RB	5.08087	11.5124	8.29664
AAEL001962-RA	0.811424	4.71525	2.76334
AAEL001963-RA	2.46676	4.37557	3.42116
AAEL001964-RA	6.27814	27.1647	16.7214
AAEL001964-RB	12.3253	0.000108845	6.1627
AAEL001965-RA	3.87433	6.28685	5.08059
AAEL001967-RA	0	0	0
AAEL001968-RA	10.8097	29.5415	20.1756
AAEL001968-RB	23.9915	18.793	21.3922
AAEL001969-RA	6.85724	9.00928	7.93326
AAEL001971-RA	6.41825	8.52395	7.4711
AAEL001972-RA	28.8876	24.7557	26.8216
AAEL001974-RA	38.5362	47.9444	43.2403
AAEL001975-RA	0	0	0
AAEL001976-RA	0	10.2126	5.1063
AAEL001978-RA	3.29336	3.66123	3.47729
AAEL001980-RA	0	0.0570959	0.0285479
AAEL001981-RA	0	0	0
AAEL001982-RA	1.89855	6.64458	4.27156
AAEL001984-RA	1.15642	9.47165	5.31404
AAEL001985-RA	1.2307	0	0.61535
AAEL001986-RA	0.147619	2.88113	1.51437
AAEL001987-RA	0	0	0
AAEL001988-RA	0	0	0
AAEL001989-RA	0	0	0
AAEL001991-RA	0	0	0
AAEL001991-RB	0	0	0
AAEL001992-RB	0	0.344329	0.172164
AAEL001992-RC	0	8.81e-05	4.405e-05
AAEL001992-RD	0	0.0949015	0.0474507
AAEL001992-RE	0	5.77e-05	2.885e-05
AAEL001992-RF	0	4.33e-10	2.165e-10
AAEL001992-RG	4.05247	8.49838	6.27542
AAEL001992-RH	0	1.83631	0.918155
AAEL001992-RI	0	0	0
AAEL001992-RJ	0	6.71e-06	3.355e-06
AAEL001992-RK	0.0705797	0.340386	0.205483
AAEL001992-RL	0	1.22e-07	6.1e-08
AAEL001992-RM	0	0.498804	0.249402
AAEL001992-RN	0	0.46571	0.232855
AAEL001992-RO	0	3.66e-05	1.83e-05
AAEL001992-RP	0	1.797	0.8985
AAEL001992-RQ	0	0.922766	0.461383
AAEL001992-RR	0	0.092658	0.046329
AAEL001992-RS	0	8.11e-09	4.055e-09
AAEL001992-RT	0	2.34e-06	1.17e-06
AAEL001993-RA	0	0	0
AAEL001994-RA	0	0	0
AAEL001995-RA	0	0	0
AAEL001997-RA	40.0548	71.2747	55.6647
AAEL001998-RA	559.476	562.661	561.068
AAEL001999-RB	0	0	0
AAEL002000-RA	0	0	0
AAEL002000-RB	0	0.210976	0.105488
AAEL002001-RA	0	0	0
AAEL002001-RB	0	0	0
AAEL002002-RA	38.5867	41.8452	40.2159
AAEL002003-RA	0	0	0
AAEL002004-RA	0	0	0
AAEL002005-RB	11.1324	6.81888	8.97564
AAEL002006-RA	0	7.21501	3.60751
AAEL002006-RB	1.65725	2.21416	1.93571
AAEL002007-RA	0	0	0
AAEL002009-RA	15.7227	18.2233	16.973
AAEL002010-RA	10.5649	12.0636	11.3142
AAEL002011-RB	0	0.0312921	0.0156461
AAEL002012-RB	10.8141	19.3855	15.0998
AAEL002012-RC	0.989236	4.4034	2.69632
AAEL002015-RA	0	0	0
AAEL002016-RB	6.95606	16.2506	11.6033
AAEL002017-RB	0	0	0
AAEL002019-RA	5.24262	7.74871	6.49566
AAEL002021-RB	0	0	0
AAEL002021-RC	0	0	0
AAEL002022-RA	0	0.161899	0.0809495
AAEL002023-RA	3.06288	40.419	21.7409
AAEL002024-RA	0	0	0
AAEL002026-RA	0	0	0
AAEL002028-RA	0	0.244277	0.122138
AAEL002029-RA	0	0	0
AAEL002031-RB	91.4623	60.6962	76.0793
AAEL002034-RA	0.437249	0.224885	0.331067
AAEL002035-RA	0	0	0
AAEL002036-RB	0.0115147	30.8694	15.4405
AAEL002038-RB	0	0	0
AAEL002039-RA	0.304908	0.0869975	0.195953
AAEL002040-RA	0	0	0
AAEL002041-RA	0	0	0
AAEL002043-RA	0.353152	0.811868	0.58251
AAEL002047-RA	2903.91	3414.46	3159.18
AAEL002048-RA	16.9528	21.3063	19.1296
AAEL002048-RB	3.49348	6.04406	4.76877
AAEL002049-RD	25.391	22.0064	23.6987
AAEL002049-RE	5.42406	5.70898	5.56652
AAEL002049-RF	0	0	0
AAEL002049-RG	12.8289	11.1563	11.9926
AAEL002050-RB	8.28577	11.4154	9.85058
AAEL002051-RA	4.21011	8.59901	6.40456
AAEL002051-RB	0	0	0
AAEL002051-RC	0	0	0
AAEL002051-RD	0	0	0
AAEL002051-RE	0	0	0
AAEL002051-RF	0	0.410561	0.205281
AAEL002051-RG	0.0039213	0.177842	0.0908816
AAEL002051-RH	0.286931	0	0.143465
AAEL002051-RI	0	0	0
AAEL002051-RJ	0	0	0
AAEL002051-RK	0	0.0933254	0.0466627
AAEL002055-RA	6.99645	12.1089	9.55268
AAEL002056-RA	0	0	0
AAEL002056-RB	6.9729	11.5535	9.2632
AAEL002057-RA	0	0.0288541	0.0144271
AAEL002061-RA	15.0314	24.3529	19.6922
AAEL002065-RA	11.091	18.0142	14.5526
AAEL002068-RA	46.7513	67.5617	57.1565
AAEL002069-RA	9.70704	14.8252	12.2661
AAEL002070-RB	0	0	0
AAEL002070-RC	0	0	0
AAEL002070-RD	0.451087	0.786367	0.618727
AAEL002070-RE	0	0	0
AAEL002070-RF	0	0	0
AAEL002070-RG	0	0	0
AAEL002070-RH	0	0	0
AAEL002070-RI	0	0	0
AAEL002070-RJ	0	0	0
AAEL002070-RK	0	0	0
AAEL002070-RL	0	0	0
AAEL002072-RA	0	0.0268754	0.0134377
AAEL002075-RA	0	0.106005	0.0530025
AAEL002077-RA	52.134	64.4735	58.3038
AAEL002078-RA	10.6866	16.2009	13.4438
AAEL002079-RA	2.21763	3.64395	2.93079
AAEL002080-RC	1.32299	0	0.661495
AAEL002080-RD	0	6.13273	3.06636
AAEL002080-RE	0	1.24376	0.62188
AAEL002080-RF	0	1.0231	0.51155
AAEL002083-RA	238.932	362.329	300.63
AAEL002084-RB	9.65424	29.5241	19.5892
AAEL002085-RA	0	0	0
AAEL002135-RA	9.17725	17.0403	13.1088
AAEL002137-RD	39.1704	42.7177	40.9441
AAEL002138-RA	2.62106	1.62257	2.12181
AAEL002139-RA	9.52313	14.2593	11.8912
AAEL002140-RA	59.6872	67.4508	63.569
AAEL002141-RA	0	0.108982	0.054491
AAEL002142-RA	1.09999	14.3098	7.70489
AAEL002145-RA	7.16241	6.11809	6.64025
AAEL002145-RB	0.00572319	11.1852	5.59546
AAEL002148-RA	17.8376	15.6636	16.7506
AAEL002152-RA	6.40278	17.4209	11.9118
AAEL002153-RA	0	0.0799343	0.0399671
AAEL002155-RA	30.5241	44.7507	37.6374
AAEL002157-RA	4.91418	11.922	8.41809
AAEL002157-RB	2.06088	3.30416	2.68252
AAEL002158-RA	453.258	470.764	462.011
AAEL002159-RA	4.34579	10.2693	7.30754
AAEL002160-RA	202.592	214.017	208.305
AAEL002161-RA	48.918	62.6527	55.7854
AAEL002163-RA	46.9545	49.278	48.1163
AAEL002165-RA	21.2699	38.9842	30.1271
AAEL002167-RA	0	0	0
AAEL002169-RB	3.08586	13.7812	8.43353
AAEL002170-RA	40.634	46.4345	43.5343
AAEL002170-RB	0	0	0
AAEL002173-RB	0	0.0975044	0.0487522
AAEL002174-RA	63.632	64.9685	64.3003
AAEL002175-RA	26.9533	36.2136	31.5834
AAEL002176-RB	7.15676	6.27445	6.71561
AAEL002177-RA	0	0	0
AAEL002178-RB	1.77e-07	0.404632	0.202316
AAEL002178-RC	5.46644	9.67351	7.56998
AAEL002178-RD	20.0417	43.0626	31.5522
AAEL002179-RA	9.49509	16.7496	13.1223
AAEL002182-RB	0	0.0185453	0.00927265
AAEL002182-RC	22.6009	21.8022	22.2015
AAEL002182-RD	1.3483	1.59753	1.47291
AAEL002182-RE	4.71e-05	11.1031	5.55157
AAEL002183-RA	78.1543	64.7528	71.4536
AAEL002184-RA	39.6708	48.4458	44.0583
AAEL002185-RA	0	1.40125	0.700625
AAEL002186-RA	6.22932	10.0818	8.15556
AAEL002187-RA	0	0.0753112	0.0376556
AAEL002189-RA	0	0	0
AAEL002190-RA	46.0591	50.7324	48.3957
AAEL002191-RA	0	0	0
AAEL002192-RB	0	0	0
AAEL002192-RC	0	0	0
AAEL002192-RD	0	0	0
AAEL002192-RE	0.385894	0.436679	0.411286
AAEL002192-RF	0	0.154662	0.077331
AAEL002192-RG	0	0	0
AAEL002194-RA	0.146309	0.457739	0.302024
AAEL002195-RB	0	8.07336	4.03668
AAEL002196-RB	0	0	0
AAEL002196-RC	0.000149337	0	7.46685e-05
AAEL002196-RD	1.04e-09	1.73894	0.86947
AAEL002196-RE	0	2.29e-07	1.145e-07
AAEL002196-RF	1.02013	0	0.510065
AAEL002198-RA	31.3098	22.6631	26.9864
AAEL002199-RA	0	0	0
AAEL002202-RA	0	0	0
AAEL002207-RA	18.8154	27.9583	23.3869
AAEL002208-RA	0	0	0
AAEL002209-RA	0.0621513	0.197192	0.129672
AAEL002211-RA	0	0	0
AAEL002212-RA	0	0	0
AAEL002213-RA	0	0.263835	0.131917
AAEL002214-RA	0	1.37251	0.686255
AAEL002214-RB	0	4.03817	2.01909
AAEL002214-RC	0	0.710837	0.355419
AAEL002214-RD	1.29473	5.30952	3.30213
AAEL002214-RE	4.61e-10	1.24934	0.62467
AAEL002215-RA	4.40334	8.9201	6.66172
AAEL002215-RB	0	1.2543	0.62715
AAEL002216-RB	36.7301	43.7635	40.2468
AAEL002217-RA	0	0.200377	0.100188
AAEL002219-RA	1.14965	6.40301	3.77633
AAEL002220-RB	0	0.0525439	0.0262719
AAEL002221-RA	11.1096	13.2595	12.1845
AAEL002222-RA	1.98995	2.31417	2.15206
AAEL002222-RB	0	0	0
AAEL002223-RA	0	0	0
AAEL002225-RA	15.9993	25.3318	20.6655
AAEL002228-RA	0.0852393	0.52321	0.304225
AAEL002229-RA	0	0	0
AAEL002231-RA	0	0.270012	0.135006
AAEL002232-RA	8.61281	13.2204	10.9166
AAEL002233-RA	0	0	0
AAEL002234-RB	0	0.0197844	0.0098922
AAEL002234-RC	0	0	0
AAEL002234-RD	0	0	0
AAEL002235-RA	3.20427	10.2138	6.70904
AAEL002235-RB	0	0.964392	0.482196
AAEL002235-RC	0	4.14e-07	2.07e-07
AAEL002235-RD	2.46e-09	0.0154149	0.00770745
AAEL002235-RE	0.0741459	1.29e-05	0.0370794
AAEL002235-RF	0	2.15e-05	1.075e-05
AAEL002235-RG	2.1e-07	0.849745	0.424873
AAEL002235-RH	2.46e-09	7.16e-06	3.58123e-06
AAEL002235-RI	0.238438	0.317238	0.277838
AAEL002237-RA	0	0.0057104	0.0028552
AAEL002238-RA	4.57239	9.21297	6.89268
AAEL002239-RA	0	0	0
AAEL002240-RB	11.7243	15.8505	13.7874
AAEL002241-RA	0	0	0
AAEL002242-RA	0	0.736762	0.368381
AAEL002243-RA	0	0	0
AAEL002244-RA	0	1.89514	0.94757
AAEL002244-RB	0.0943592	0.650003	0.372181
AAEL002244-RC	0.524153	0	0.262076
AAEL002244-RD	3.86e-09	0	1.93e-09
AAEL002245-RA	0	0	0
AAEL002246-RA	0	0	0
AAEL002248-RB	7.5754	8.47907	8.02724
AAEL002249-RA	6.32304	17.2062	11.7646
AAEL002250-RB	0.956945	3.41619	2.18657
AAEL002253-RB	0.339068	4.5079	2.42348
AAEL002254-RA	0.0139312	0.431885	0.222908
AAEL002255-RA	0.479081	0.383989	0.431535
AAEL002257-RB	8.44036	6.91187	7.67612
AAEL002258-RB	0	0.45473	0.227365
AAEL002258-RC	1.54041	2.19612	1.86827
AAEL002258-RD	3.01191	6.21827	4.61509
AAEL002260-RB	5.16823	11.2991	8.23367
AAEL002260-RC	0.400893	0.165553	0.283223
AAEL002261-RA	0.377098	29.3403	14.8587
AAEL002261-RB	0	4.67604	2.33802
AAEL002261-RC	0	0	0
AAEL002261-RD	4.37e-10	1.15877	0.579385
AAEL002261-RE	0	0	0
AAEL002263-RA	276.817	162.677	219.747
AAEL002263-RB	120.315	115.362	117.838
AAEL002264-RA	0.342069	0.427336	0.384703
AAEL002267-RA	249.441	213.983	231.712
AAEL002269-RA	0	0	0
AAEL002269-RB	2.36212	5.79591	4.07902
AAEL002270-RA	0	0	0
AAEL002271-RA	10.5494	22.6693	16.6093
AAEL002272-RA	7.2829	20.9898	14.1364
AAEL002273-RB	0	0	0
AAEL002275-RA	0	0	0
AAEL002276-RA	0.641905	0.584421	0.613163
AAEL002279-RA	6.3552	10.8234	8.5893
AAEL002287-RB	0.631422	6.32715	3.47929
AAEL002287-RC	7.74146	6.13109	6.93628
AAEL002287-RD	0.000924986	3.28812	1.64452
AAEL002321-RA	0.0334262	0.0567741	0.0451002
AAEL002321-RB	9.47e-07	0	4.735e-07
AAEL002321-RC	0.929992	0.997042	0.963517
AAEL002322-RA	5.59468	15.8869	10.7408
AAEL002324-RB	15.0425	18.8004	16.9215
AAEL002329-RB	5.28786	3.13981	4.21384
AAEL002329-RC	4.43e-07	5.14126	2.57063
AAEL002331-RA	15.6657	18.6756	17.1706
AAEL002334-RA	193.675	287.559	240.617
AAEL002335-RB	0	0	0
AAEL002335-RC	1.35602	1.6465	1.50126
AAEL002337-RA	30.7619	53.4204	42.0911
AAEL002341-RB	0.212892	2.359	1.28595
AAEL002343-RA	0	0.161467	0.0807335
AAEL002343-RB	0.311291	0.191544	0.251417
AAEL002345-RB	8.45318	17.0746	12.7639
AAEL002345-RC	0.650455	4.77e-05	0.325251
AAEL002346-RC	3.26721	6.0376	4.6524
AAEL002346-RD	3.18654	0.968643	2.07759
AAEL002346-RE	2.1726	22.3605	12.2665
AAEL002347-RA	69.4712	62.6955	66.0833
AAEL002348-RB	0.0789429	0.179674	0.129308
AAEL002349-RA	23.3687	28.0334	25.7011
AAEL002349-RB	4.24708	0.00754218	2.12731
AAEL002350-RA	70.5024	75.721	73.1117
AAEL002351-RA	4.03662	10.7825	7.40956
AAEL002351-RB	3.22263	4.83842	4.03052
AAEL002353-RB	1.06087	1.61657	1.33872
AAEL002354-RB	0	0	0
AAEL002354-RC	0	0	0
AAEL002354-RD	0	0	0
AAEL002354-RE	0	0	0
AAEL002354-RF	0	0	0
AAEL002355-RB	0.196133	0.0487522	0.122443
AAEL002356-RA	0	0	0
AAEL002357-RA	0.000317794	0	0.000158897
AAEL002357-RB	2.24e-05	0.000227405	0.000124902
AAEL002357-RC	6.84e-05	9.52e-07	3.4676e-05
AAEL002357-RD	9.04e-05	1.85e-09	4.52009e-05
AAEL002357-RE	0.0120892	0.0672032	0.0396462
AAEL002357-RF	0.0184096	0.0982996	0.0583546
AAEL002357-RG	0.0288471	0.631418	0.330133
AAEL002357-RH	0	0	0
AAEL002357-RI	0.157616	3.94e-10	0.078808
AAEL002358-RB	7.08517	13.3422	10.2137
AAEL002358-RC	0.199033	0	0.0995165
AAEL002358-RD	1.54e-06	0.663719	0.33186
AAEL002360-RB	20.0272	34.7769	27.402
AAEL002361-RA	0	0.257296	0.128648
AAEL002362-RA	8.66888	12.4997	10.5843
AAEL002366-RA	1.14919	5.21226	3.18072
AAEL002367-RA	2.86212	2.02143	2.44177
AAEL002369-RA	2.11612	7.29798	4.70705
AAEL002370-RB	13.8258	25.2648	19.5453
AAEL002371-RC	0	5.29804	2.64902
AAEL002371-RD	0	0	0
AAEL002371-RE	9.85411	11.9988	10.9265
AAEL002372-RB	5059.3	4202.09	4630.69
AAEL002373-RA	1.07271	0.952733	1.01272
AAEL002374-RA	6.17446	14.5353	10.3549
AAEL002374-RB	4.92008	1.47704	3.19856
AAEL002375-RA	26.2614	54.8177	40.5395
AAEL002377-RA	38.3645	60.974	49.6692
AAEL002378-RB	0	0.0364651	0.0182326
AAEL002380-RA	0	0.127398	0.063699
AAEL002383-RA	0	0	0
AAEL002384-RA	5.47345	14.9206	10.197
AAEL002385-RB	3.99005	6.15134	5.0707
AAEL002386-RA	34.9405	45.2843	40.1124
AAEL002387-RA	18.8488	23.0368	20.9428
AAEL002388-RA	2.23142	11.3197	6.77556
AAEL002388-RB	4.00447	7.70593	5.8552
AAEL002390-RA	6.28395	14.4387	10.3613
AAEL002390-RB	3.89209	3.62812	3.76011
AAEL002391-RA	0	0	0
AAEL002391-RB	0	0	0
AAEL002391-RC	0	0	0
AAEL002391-RD	0	0.10054	0.05027
AAEL002392-RA	0	5.24e-05	2.62e-05
AAEL002392-RB	0	0	0
AAEL002392-RC	0	2.50594	1.25297
AAEL002392-RD	1.14665	2.94e-07	0.573325
AAEL002392-RE	5.34e-11	0.172269	0.0861345
AAEL002392-RF	0	2.07486	1.03743
AAEL002394-RA	0	0.0807274	0.0403637
AAEL002394-RB	0	0.000328838	0.000164419
AAEL002395-RB	2.41548	9.27131	5.8434
AAEL002395-RC	2.77998	5.64929	4.21463
AAEL002395-RD	0	0	0
AAEL002397-RA	0.815657	0.90712	0.861389
AAEL002399-RA	65.7504	104.807	85.2787
AAEL002401-RA	54.3526	63.0642	58.7084
AAEL002402-RB	1.47925	4.78463	3.13194
AAEL002404-RB	0	0.00386367	0.00193184
AAEL002404-RC	0	0.000145419	7.27095e-05
AAEL002404-RD	0	2.58437	1.29218
AAEL002404-RE	0	0	0
AAEL002404-RF	0	1.16074	0.58037
AAEL002404-RG	0.216022	7.74993	3.98298
AAEL002404-RH	0	1.20768	0.60384
AAEL002406-RA	1.48424	6.96387	4.22405
AAEL002407-RB	24.5201	57.8845	41.2023
AAEL002408-RB	0.110429	1.65856	0.884494
AAEL002410-RB	0	0.0208315	0.0104157
AAEL002410-RC	0	0.0304948	0.0152474
AAEL002411-RC	195.706	172.794	184.25
AAEL002411-RD	54.5853	95.4087	74.997
AAEL002412-RA	1.77262	3.83926	2.80594
AAEL002413-RA	0	3.24429	1.62214
AAEL002415-RC	0	0	0
AAEL002415-RD	0.601675	2.55184	1.57676
AAEL002415-RE	0	0.659454	0.329727
AAEL002415-RF	2.41343	4.39243	3.40293
AAEL002415-RG	0	0	0
AAEL002415-RH	3.04429	0	1.52215
AAEL002416-RA	23.9492	18.6147	21.282
AAEL002416-RB	2.3691	11.8543	7.1117
AAEL002417-RA	0	0.776413	0.388207
AAEL002417-RB	37.152	86.1573	61.6547
AAEL002417-RC	3.95812	1.88467	2.92139
AAEL002417-RD	14.8811	2.34096	8.61103
AAEL002417-RE	8.68918	0.0229	4.35604
AAEL002417-RF	11.6555	29.7327	20.6941
AAEL002417-RG	3.65743	1.12352	2.39048
AAEL002417-RH	2.12494	13.4218	7.77337
AAEL002417-RI	0	0.0216162	0.0108081
AAEL002417-RJ	0	0.274837	0.137418
AAEL002417-RK	0	0.371935	0.185968
AAEL002417-RL	0	0.010019	0.0050095
AAEL002417-RM	0	0.127402	0.063701
AAEL002417-RN	0	0	0
AAEL002417-RO	0	0.0214117	0.0107058
AAEL002417-RP	0	1.07129	0.535645
AAEL002418-RA	30.0344	33.9742	32.0043
AAEL002419-RA	4.65401	7.48909	6.07155
AAEL002422-RB	0	2.07874	1.03937
AAEL002422-RC	0	13.4373	6.71865
AAEL002422-RD	0	1.78454	0.89227
AAEL002422-RE	0	0.252062	0.126031
AAEL002422-RF	0	2.78958	1.39479
AAEL002422-RG	0	12.3274	6.1637
AAEL002422-RH	0	0	0
AAEL002422-RI	0	8.26409	4.13204
AAEL002422-RJ	0	0.96079	0.480395
AAEL002422-RK	0	0.520303	0.260151
AAEL002422-RL	0	3.14791	1.57395
AAEL002422-RM	0	4.09981	2.0499
AAEL002422-RN	0	1.14407	0.572035
AAEL002422-RO	0	4.96651	2.48326
AAEL002422-RP	0	5.16033	2.58017
AAEL002423-RA	1.93323	3.20253	2.56788
AAEL002425-RA	0	0.121587	0.0607935
AAEL002426-RA	23.3709	28.9383	26.1546
AAEL002427-RB	4.04719	5.90108	4.97414
AAEL002428-RB	9.81e-05	1.34547	0.672784
AAEL002428-RC	11.9228	17.9604	14.9416
AAEL002428-RD	0	0.274598	0.137299
AAEL002428-RE	0.655892	0.328159	0.492026
AAEL002430-RA	2.36934	10.0138	6.19157
AAEL002432-RA	0.0427257	0.749711	0.396218
AAEL002433-RA	9.00492	14.5946	11.7998
AAEL002435-RA	5.40984	7.95142	6.68063
AAEL002435-RB	2.0001	6.23102	4.11556
AAEL002435-RC	0.0548638	2.87968	1.46727
AAEL002435-RD	4.59922	2.02698	3.3131
AAEL002435-RE	18.2389	43.1938	30.7164
AAEL002435-RF	0	3.57368	1.78684
AAEL002436-RD	2.70467	7.30484	5.00476
AAEL002436-RE	6.33903	5.22635	5.78269
AAEL002436-RF	7.1148	7.79495	7.45487
AAEL002438-RB	0	0.28394	0.14197
AAEL002450-RA	4.5418	7.75813	6.14996
AAEL002451-RB	0	2.84244	1.42122
AAEL002453-RB	4.92111	5.45551	5.18831
AAEL002454-RA	0.467247	1.1901	0.828673
AAEL002455-RB	1.50032	4.09089	2.79561
AAEL002455-RC	1.39021	14.185	7.78761
AAEL002455-RD	0	0.256883	0.128441
AAEL002462-RA	1.72681	4.14657	2.93669
AAEL002463-RB	13.0557	26.0837	19.5697
AAEL002465-RB	7.67675	10.6239	9.15033
AAEL002467-RA	22.6098	67.1641	44.8869
AAEL002481-RA	0	0.0547718	0.0273859
AAEL002483-RA	17.3676	26.76	22.0638
AAEL002486-RA	1.31979	2.94407	2.13193
AAEL002486-RB	8.54793	12.9108	10.7294
AAEL002487-RB	25.5358	25.1296	25.3327
AAEL002490-RA	0	0	0
AAEL002493-RA	4.73959	8.42205	6.58082
AAEL002499-RA	2.80658	3.26582	3.0362
AAEL002501-RA	57.4469	84.5389	70.9929
AAEL002501-RB	39.1243	39.7154	39.4198
[truncated: 14,517 more rows]

## Sheet: KallistoN7
Name	M7N1	M7N2	M7N3	N7 Average
AAEL000016-RA	40.6942	15.2674	23.7697	26.5771
AAEL000017-RA	1.15956	0.229723	0.400465	0.596583
AAEL000017-RB	0.794166	0.0871427	0.101733	0.327681
AAEL000024-RA	0	0	0	0
AAEL000024-RB	0	0	0	0
AAEL000024-RC	0.256612	0.188845	0.0892043	0.17822
AAEL000029-RB	0	0	0	0
AAEL000049-RA	4.0938	3.39763	1.71338	3.06827
AAEL000049-RB	34.3589	15.9988	12.7133	21.0237
AAEL000049-RC	2.69e-07	0.00297017	3.0222	1.00839
AAEL000064-RA	2.02129	0.095062	0.19167	0.769341
AAEL000079-RB	0	0.0592417	0.0224944	0.0272454
AAEL000079-RC	0.769356	0.0374024	0.015354	0.274037
AAEL000079-RD	0	0	0	0
AAEL000081-RB	12.3178	26.0476	26.0777	21.481
AAEL000084-RA	71.6979	48.1126	46.2321	55.3475
AAEL000084-RB	4.90474	2.13657	3.91148	3.65093
AAEL000101-RA	39.2085	5.25767	4.95401	16.4734
AAEL000102-RB	45.6911	75.8954	79.3328	66.9731
AAEL000106-RA	9.43506	2.21729	3.99388	5.21541
AAEL000107-RA	1.77751	2.35645	2.7187	2.28422
AAEL000108-RA	0.276547	0	0.0824272	0.119658
AAEL000109-RA	4.91433	9.8174	7.91737	7.5497
AAEL000111-RA	3.6144	0.982198	0.115098	1.57057
AAEL000113-RA	0	0	0	0
AAEL000115-RA	35.0915	15.5571	14.8873	21.8453
AAEL000116-RB	1.16656	0.808442	0.56295	0.845984
AAEL000117-RA	0	0	0	0
AAEL000117-RB	0	0	0.0341504	0.0113835
AAEL000118-RA	10.0435	7.36364	6.5833	7.99681
AAEL000119-RA	58.3398	3.55187	2.40951	21.4337
AAEL000122-RA	2.69851	1.27519	1.88204	1.95191
AAEL000122-RB	1.39904	1.69655	1.34728	1.48096
AAEL000123-RA	0	0	0.0410948	0.0136983
AAEL000124-RA	32.5902	0	30.0453	20.8785
AAEL000126-RA	13.1515	30.0372	26.3068	23.1652
AAEL000126-RB	2.07e-05	0.912855	8.66e-06	0.304295
AAEL000126-RC	2.92063	11.7399	11.325	8.66184
AAEL000127-RA	5.57486	4.84367	2.49256	4.3037
AAEL000127-RB	0	0	0	0
AAEL000128-RB	0.118636	0.240605	2.62958	0.996274
AAEL000128-RC	18.1496	35.7437	29.7308	27.8747
AAEL000134-RA	0	0.405906	0.286732	0.230879
AAEL000137-RB	0.781917	0.431116	0.0680243	0.427019
AAEL000137-RC	0	0	0.268006	0.0893353
AAEL000137-RD	12.7015	0.60266	0.924214	4.74279
AAEL000137-RE	10.2431	0	0	3.41437
AAEL000137-RF	10.2431	0	0	3.41437
AAEL000138-RA	850.721	129.577	136.939	372.412
AAEL000139-RA	6.61754	0	6.2607	4.29275
AAEL000140-RA	1.30913	2.93858	3.84148	2.6964
AAEL000140-RB	0	0	0	0
AAEL000143-RA	110.382	19.2573	17.1201	48.9198
AAEL000146-RA	0.70631	10.208	9.34005	6.75145
AAEL000147-RA	22.192	13.6788	7.70639	14.5257
AAEL000148-RA	4.8648	1.5078	1.98403	2.78554
AAEL000149-RA	6.08501	4.89178	4.56339	5.18006
AAEL000151-RB	0.4395	0	0	0.1465
AAEL000152-RA	25.1048	4.67195	10.4051	13.3939
AAEL000154-RA	0.0501069	0.0967236	0.0958718	0.0809008
AAEL000157-RA	0.863868	1.77551	1.49746	1.37895
AAEL000219-RA	290.838	97.3107	75.233	154.461
AAEL000221-RA	12.4159	8.39e-09	4.15e-07	4.13863
AAEL000221-RB	223.481	48.4341	49.4014	107.106
AAEL000223-RA	0.383329	82.1803	114.28	65.6145
AAEL000224-RA	0	0	0	0
AAEL000224-RB	0	0	0.0360456	0.0120152
AAEL000226-RA	14.0832	4.67088	4.88205	7.87871
AAEL000227-RA	0.665535	6.72527	9.92184	5.77088
AAEL000229-RA	0	0	0	0
AAEL000230-RA	26.9569	11.8232	10.697	16.4924
AAEL000231-RA	81.8848	24.9071	25.1047	43.9655
AAEL000234-RA	0	0	0	0
AAEL000234-RB	0	0	0.319326	0.106442
AAEL000234-RC	0	0	0	0
AAEL000234-RD	0	2.897	0	0.965667
AAEL000234-RE	0	0	0.356637	0.118879
AAEL000234-RF	0	0	0	0
AAEL000234-RG	0.779393	4.5206	8.45016	4.58338
AAEL000234-RH	2.74719	6.46881	7.56443	5.59348
AAEL000234-RI	0	0	0.277601	0.0925337
AAEL000234-RJ	0	0.2592	1.32813	0.52911
AAEL000234-RK	0.832773	0.469511	0	0.434095
AAEL000234-RL	0	1.24166	0	0.413887
AAEL000234-RM	0	0	0	0
AAEL000234-RN	1.25e-09	0	0	4.16667e-10
AAEL000234-RO	4.91956	0	0.671028	1.86353
AAEL000234-RP	0	0	0.0828374	0.0276125
AAEL000234-RQ	0	0	0	0
AAEL000234-RR	0	0.741462	0.0873253	0.276262
AAEL000235-RA	27.5874	26.6055	21.2562	25.1497
AAEL000238-RB	0	0	0	0
AAEL000238-RC	0	0	0	0
AAEL000238-RD	0	0	0.0170978	0.00569927
AAEL000239-RB	0.166308	0.371818	0.658485	0.39887
AAEL000240-RA	66.3738	17.0786	14.5924	32.6816
AAEL000240-RB	3.29824	3.04134	2.88744	3.07567
AAEL000240-RC	8.72778	0.456349	0.31824	3.16746
AAEL000241-RA	16.9604	10.3296	11.2094	12.8331
AAEL000242-RA	0	1.57e-07	0	5.23333e-08
AAEL000242-RB	0	4.44e-10	0	1.48e-10
AAEL000242-RC	0	9.69e-10	0	3.23e-10
AAEL000242-RD	0	0.0318983	0	0.0106328
AAEL000242-RE	0.045216	0.0429231	0.0589802	0.0490398
AAEL000242-RF	0	2.47e-10	0	8.23333e-11
AAEL000243-RB	0	0	0	0
AAEL000244-RA	51.6027	63.6314	76.2445	63.8262
AAEL000245-RA	65.6703	26.1151	22.5542	38.1132
AAEL000246-RA	3.14e-06	0	0	1.04667e-06
AAEL000246-RB	2.66e-09	0.0342418	0.0288155	0.0210191
AAEL000246-RC	0.00740936	0	0	0.00246979
AAEL000246-RD	4.35e-06	0	0	1.45e-06
AAEL000246-RE	0	0.089658	0.0754224	0.0550268
AAEL000246-RF	0	0	0	0
AAEL000246-RG	0.0430822	0	0	0.0143607
AAEL000247-RA	0.016985	0.00376426	0	0.00691642
AAEL000247-RB	0.56297	0.122599	0.0954977	0.260356
AAEL000248-RA	14.5414	13.1938	13.4882	13.7411
AAEL000249-RA	0	0	0	0
AAEL000249-RB	0	0	0	0
AAEL000249-RC	0	0	0.0914158	0.0304719
AAEL000249-RD	0.18548	0.383932	0	0.189804
AAEL000249-RE	0	0	0	0
AAEL000250-RB	0	0	0	0
AAEL000250-RC	0	0	0.0854915	0.0284972
AAEL000250-RD	0	1.69e-05	0	5.63333e-06
AAEL000250-RE	0	0.0191372	0	0.00637907
AAEL000250-RF	0	0	0	0
AAEL000251-RA	0	0.178651	0.231995	0.136882
AAEL000252-RA	0.0314254	0.18214	0.032769	0.0821115
AAEL000254-RB	0.00269256	0.000180005	0.000265094	0.00104589
AAEL000254-RC	0	0	0	0
AAEL000254-RD	1.51321	0.0978513	0.0491456	0.553402
AAEL000255-RA	0.414346	0.461569	0.48219	0.452702
AAEL000256-RA	0	0	1.32e-10	4.4e-11
AAEL000256-RB	0	0	0	0
AAEL000256-RC	0.00010513	0.532242	0.537655	0.356667
AAEL000256-RD	0	0	0	0
AAEL000256-RE	0.0935028	0.100028	0.114069	0.102533
AAEL000257-RA	14.1763	7.75848	8.96181	10.2989
AAEL000266-RB	0	0	0	0
AAEL000266-RC	0	0	0	0
AAEL000266-RD	0	0	0	0
AAEL000267-RA	0.661995	0	0	0.220665
AAEL000267-RB	0	0	0	0
AAEL000269-RA	1053.12	1137.82	1140.97	1110.64
AAEL000271-RC	17.0324	0.937569	0	5.98999
AAEL000271-RD	16.387	8.37572	6.72733	10.4967
AAEL000271-RE	19.0746	36.4139	52.0765	35.855
AAEL000281-RA	0.218171	0.736978	1.08727	0.680806
AAEL000281-RB	0	3.13084	3.01477	2.04854
AAEL000281-RC	0	0	0	0
AAEL000282-RB	3.66537	2.2208	1.80058	2.56225
AAEL000283-RB	0.140944	0	0	0.0469813
AAEL000284-RA	0	1.93895	0	0.646317
AAEL000284-RB	51.4352	25.8133	23.2682	33.5056
AAEL000288-RA	0.236062	1.09587	0.399164	0.577032
AAEL000288-RB	0	0.0686299	0	0.0228766
AAEL000288-RC	0	0	0	0
AAEL000288-RD	0	0	0	0
AAEL000288-RE	0	0	0	0
AAEL000288-RF	0	2.36923	2.00978	1.45967
AAEL000288-RG	0	0.0677284	0	0.0225761
AAEL000288-RH	0	0.180275	0	0.0600917
AAEL000293-RA	53.7767	114.183	106.445	91.4682
AAEL000304-RF	21.0883	2.89199	2.87861	8.95297
AAEL000305-RA	0.527591	0.37757	0.476105	0.460422
AAEL000308-RA	0.212485	0.131928	0.0277012	0.124038
AAEL000308-RB	0	0	0	0
AAEL000308-RC	0	0	0	0
AAEL000308-RD	0	0	0	0
AAEL000308-RE	0	0	0	0
AAEL000308-RF	0	0	0	0
AAEL000308-RG	0	0	0	0
AAEL000311-RA	5.38e-08	0.925729	0.239999	0.388576
AAEL000311-RB	4.99982	0	4.63e-06	1.66661
AAEL000311-RC	0	0	0.000285762	9.5254e-05
AAEL000312-RA	0.0382134	0.126593	0.199187	0.121331
AAEL000314-RB	86.5693	47.117	57.6133	63.7665
AAEL000315-RB	0.521191	5.94777	9.53623	5.33506
AAEL000315-RC	0	0.229738	0	0.0765793
AAEL000315-RD	0	0	0.517541	0.172514
AAEL000316-RA	0.871489	0.309583	0	0.393691
AAEL000322-RA	3.69618	0.303443	1.03966	1.67976
AAEL000322-RB	0	0.802946	0.344402	0.382449
AAEL000323-RA	0	0	0	0
AAEL000324-RB	0.453737	0.788302	0.54929	0.59711
AAEL000327-RB	0	0	0	0
AAEL000327-RC	0.0834299	0	0.0087071	0.0307123
AAEL000328-RA	20.8692	35.0408	24.1885	26.6995
AAEL000328-RB	0	3.5836	17.0538	6.87913
AAEL000328-RC	0.00636942	8.90337	5.86083	4.92352
AAEL000328-RD	0.559739	39.1065	29.4037	23.0233
AAEL000328-RE	39.834	11.1031	3.13727	18.0248
AAEL000329-RA	0	0	0	0
AAEL000330-RA	79.4429	40.1966	41.0307	53.5567
AAEL000332-RA	51.2879	19.151	15.5641	28.6677
AAEL000334-RB	0	0	0	0
AAEL000334-RC	0	0	0.0121209	0.0040403
AAEL000335-RA	0.0830949	0.0137529	0	0.0322826
AAEL000337-RA	3.13965	3.40548	3.20842	3.25118
AAEL000341-RB	0	0.656606	0.0413811	0.232662
AAEL000342-RB	0	0	0	0
AAEL000342-RC	0.482643	0	0	0.160881
AAEL000342-RD	0	0	0	0
AAEL000342-RE	0.135908	0.725038	0.867582	0.576176
AAEL000342-RF	0	0	0	0
AAEL000342-RG	0	0	0	0
AAEL000342-RH	0	0.883665	0.67843	0.520698
AAEL000343-RC	5.48956	3.15523	3.76248	4.13576
AAEL000343-RD	0.0936791	0.718456	0.498273	0.436803
AAEL000343-RE	0.398345	0.966244	1.04493	0.803173
AAEL000344-RA	0	0	0	0
AAEL000348-RB	0	0	0	0
AAEL000348-RC	1.11106	0.282809	1.15608	0.849983
AAEL000348-RD	0	0.355263	0	0.118421
AAEL000348-RE	0	0	0	0
AAEL000351-RB	0	0	0.0681809	0.022727
AAEL000351-RC	0	0	0	0
AAEL000354-RA	52.5953	0	0	17.5318
AAEL000354-RB	0	0.152492	0	0.0508307
AAEL000356-RB	6.70415	1.81937	1.05056	3.19136
AAEL000359-RA	0	0	0	0
AAEL000360-RA	0.492827	0.867102	1.18842	0.84945
AAEL000362-RA	0	0	0	0
AAEL000362-RB	0	0.0976213	0	0.0325404
AAEL000362-RC	0	0	0	0
AAEL000362-RD	5.713	4.16169	2.90799	4.26089
AAEL000362-RE	0	5.47403	6.41304	3.96236
AAEL000362-RF	0	0	0	0
AAEL000370-RA	2.21619	7.24738	3.48045	4.31467
AAEL000370-RB	20.7569	23.65	22.7517	22.3862
AAEL000370-RC	1.40882	0.190997	0.791897	0.797238
AAEL000372-RA	58.673	27.3881	24.7976	36.9529
AAEL000377-RA	0	0	0	0
AAEL000378-RA	15.3562	16.7923	15.6668	15.9384
AAEL000379-RA	1.01117	0	0	0.337057
AAEL000382-RA	0.080163	0.142126	0.0597513	0.0940134
AAEL000384-RB	0	0	0	0
AAEL000568-RB	88.4026	35.8082	37.8011	54.004
AAEL000571-RB	0	0.562753	0	0.187584
AAEL000571-RC	0.119071	0	0.310538	0.143203
AAEL000576-RB	0.200616	0.147542	0.0930442	0.147067
AAEL000578-RA	0	1.45355	2.56596	1.33984
AAEL000579-RB	10.7704	8.17272	8.86726	9.27013
AAEL000580-RA	0	0	0	0
AAEL000580-RB	0.0590824	0	0	0.0196941
AAEL000580-RC	0	0	0	0
AAEL000580-RD	0	0	0	0
AAEL000580-RE	0	0	0	0
AAEL000584-RA	0	0	0.0373928	0.0124643
AAEL000589-RA	1.42397	4.98392	4.73444	3.71411
AAEL000589-RB	0	0	0	0
AAEL000589-RC	0	2.69229	4.72478	2.47236
AAEL000589-RD	4.91e-08	0	0	1.63667e-08
AAEL000589-RE	5.18949	10.9695	6.78235	7.64711
AAEL000594-RA	16.981	14.6391	13.9879	15.2027
AAEL000596-RB	0	2.21464	0.341826	0.852155
AAEL000597-RB	0.0255198	0.268381	0.247354	0.180418
AAEL000599-RA	0.361216	0.422743	0.183889	0.322616
AAEL000600-RA	5.25356	2.75315	2.83398	3.61356
AAEL000600-RB	0	0	0	0
AAEL000600-RC	0	0	0	0
AAEL000603-RB	0.848291	0	0	0.282764
AAEL000604-RC	0.393759	1.03662	2.29102	1.24047
AAEL000605-RA	26.335	7.07961	5.62221	13.0123
AAEL000609-RA	0	0	0.114398	0.0381327
AAEL000613-RA	0	0	0	0
AAEL000614-RB	0	0	0	0
AAEL000616-RB	0	0	0	0
AAEL000618-RB	94.9108	0.910828	0.374583	32.0654
AAEL000622-RC	23.7643	24.5873	25.8881	24.7466
AAEL000623-RA	0	0	0	0
AAEL000626-RA	1.06278	0.198835	0	0.420538
AAEL000626-RB	221.391	56.8648	39.8325	106.029
AAEL000626-RC	6.19444	3.89353	1.7152	3.93439
AAEL000626-RD	44.7567	43.0681	40.1232	42.6493
AAEL000628-RA	0	0	0	0
AAEL000629-RA	0.654163	1.38445	1.25035	1.09632
AAEL000630-RA	0.0826223	0.171089	0.0861237	0.113278
AAEL000630-RB	2.58e-09	5.8e-09	5.61e-08	2.14933e-08
AAEL000631-RB	0	0	0	0
AAEL000679-RA	542.518	89.0976	77.9615	236.526
AAEL000682-RA	2.91054	10.4673	11.0307	8.13618
AAEL000683-RB	0	0	0.0230953	0.00769843
AAEL000685-RA	2.98642	2.7842	2.84548	2.87203
AAEL000686-RA	0	0	0	0
AAEL000687-RA	3.56001	35.627	39.4313	26.2061
AAEL000689-RA	0.303668	0.157185	0.118716	0.19319
AAEL000690-RB	0.0278156	0.138169	0.0870264	0.084337
AAEL000692-RA	16.2763	4.71179	4.02223	8.33677
AAEL000694-RB	0	0	0	0
AAEL000697-RB	0	0.0714163	1.47633	0.515915
AAEL000697-RC	0	1.88878	0	0.629593
AAEL000697-RD	1.90073	0	0	0.633577
AAEL000698-RB	0	0	0	0
AAEL000698-RC	0	0	0	0
AAEL000699-RA	4.09266	5.06751	6.23594	5.13204
AAEL000701-RA	73.1086	25.269	25.9941	41.4572
AAEL000703-RA	55.2234	34.1849	27.4673	38.9585
AAEL000704-RB	0.195361	0.362289	1.07467	0.544107
AAEL000704-RC	0	0.792993	1.15e-08	0.264331
AAEL000704-RD	0	0.253486	0	0.0844953
AAEL000705-RA	0.49458	0.0111871	0.220994	0.242254
AAEL000705-RB	0	0.427661	0	0.142554
AAEL000706-RA	71.6312	55.6368	50.3826	59.2169
AAEL000707-RA	14.4567	9.93049	10.52	11.6357
AAEL000708-RA	41.7441	24.155	15.6069	27.1687
AAEL000709-RB	20.4348	52.6339	45.0329	39.3672
AAEL000709-RC	3.72092	32.2552	18.2853	18.0871
AAEL000713-RA	16.8754	7.59912	8.27207	10.9155
AAEL000713-RB	0	0.397635	0.429397	0.275677
AAEL000713-RC	45.1685	182.594	151.889	126.55
AAEL000713-RD	144.191	109.024	75.7133	109.643
AAEL000714-RA	0	0.684559	0.31637	0.333643
AAEL000714-RB	0.0533079	0.624226	9.85e-05	0.225877
AAEL000714-RC	0	0	0	0
AAEL000715-RA	0.186695	0	0.0299692	0.0722214
AAEL000716-RA	2.71656	57.9266	43.5891	34.7441
AAEL000717-RB	0	0.00461887	0.00874363	0.00445417
AAEL000717-RC	0	7.6e-09	1.38e-07	4.85333e-08
AAEL000719-RB	2.85433	5.06944	4.00925	3.97767
AAEL000719-RC	1.42512	4.82574	5.42374	3.89153
AAEL000719-RD	0	0	0.0554793	0.0184931
AAEL000719-RE	0	0	0.0939818	0.0313273
AAEL000719-RF	0	0	0	0
AAEL000719-RG	0	0	0	0
AAEL000719-RH	0	0.637519	0.452311	0.363277
AAEL000719-RI	0	0	0	0
AAEL000720-RA	23.8872	8.80536	7.16511	13.2859
AAEL000721-RA	0	0	0.596432	0.198811
AAEL000721-RB	2.09384	8.54753	10.9077	7.18302
AAEL000722-RD	5.05899	0	0	1.68633
AAEL000722-RE	33.0985	9.32721	3.63453	15.3534
AAEL000722-RF	15.6207	1.45858	4.56772	7.21567
AAEL000723-RB	0	0	0	0
AAEL000723-RC	0	0	0	0
AAEL000723-RD	0	0	0.00867109	0.00289036
AAEL000723-RE	0	0	0	0
AAEL000723-RF	0	0	0	0
AAEL000723-RG	0.00986091	0	0	0.00328697
AAEL000723-RH	0	0	0	0
AAEL000723-RI	0	0	0	0
AAEL000723-RJ	8.6e-08	0	0	2.86667e-08
AAEL000723-RK	0	0	0	0
AAEL000724-RC	5.26062	5.97997	5.51306	5.58455
AAEL000725-RB	0	0	0	0
AAEL000725-RC	0	0	0	0
AAEL000726-RA	0	0.0325983	0.0410296	0.0245426
AAEL000729-RB	0	2.37e-06	7.12e-07	1.02733e-06
AAEL000729-RC	0	2.81e-05	5.56e-06	1.122e-05
AAEL000729-RD	0.0199651	0.0211702	0.00135816	0.0141645
AAEL000729-RE	0.244941	0.255942	0.0107539	0.170546
AAEL000729-RF	0.347801	0	0.170768	0.172856
AAEL000730-RA	3.98568	5.40616	6.74519	5.37901
AAEL000730-RB	2.48402	3.45132	0.925716	2.28702
AAEL000732-RA	0	0.176552	0.171224	0.115925
AAEL000733-RA	0	0	0.0221292	0.0073764
AAEL000735-RA	84.0112	3.81499	4.56693	30.7977
AAEL000739-RA	0	0	0	0
AAEL000744-RA	1.47182	18.927	9.79283	10.0639
AAEL000746-RA	174.924	35.0999	73.7666	94.5968
AAEL000747-RB	0	0	1.14063	0.38021
AAEL000747-RC	1.23e-08	6.74e-08	1.19e-06	4.23233e-07
AAEL000747-RD	1.07048	5.29088	4.2477	3.53635
AAEL000748-RA	1.34009	0	0.0399435	0.460011
AAEL000750-RA	11.6813	9.08053	7.04944	9.27042
AAEL000751-RA	0.153323	0.0141633	0.035738	0.0677414
AAEL000757-RB	33.6116	110.737	69.2853	71.2113
AAEL000757-RC	0	6.13004	2.55104	2.89369
AAEL000933-RA	1.34815	1.00726	1.1525	1.1693
AAEL000944-RA	54.3788	44.6051	42.6772	47.2204
AAEL000944-RB	14.2479	6.33507	5.30826	8.63041
AAEL000953-RB	2.57747	8.39392	9.59689	6.85609
AAEL000953-RC	3.90707	10.9541	13.0881	9.31642
AAEL000964-RA	35.5971	9.66899	10.86	18.7087
AAEL000980-RA	2.17648	0.591732	0.692101	1.15344
AAEL000980-RB	0.453735	0.477926	0.111386	0.347682
AAEL000982-RA	25.3607	12.2312	10.8479	16.1466
AAEL000983-RA	29.0706	3.14636	2.29448	11.5038
AAEL000983-RB	1.46078	0	0.318525	0.593102
AAEL000983-RE	0	0.506866	0	0.168955
AAEL000983-RF	0.502643	12.1097	17.0503	9.88755
AAEL000983-RG	0.000565179	0	0	0.000188393
AAEL000983-RH	0.390984	0	0.506212	0.299065
AAEL000984-RB	0.638484	0	0.0515847	0.230023
AAEL000984-RC	0.22484	1.47874	1.2349	0.979493
AAEL000984-RD	0	0.355365	0.115318	0.156894
AAEL000984-RE	4.84e-09	0	1.02e-08	5.01333e-09
AAEL000985-RA	6.55035	14.7624	14.7024	12.0051
AAEL000985-RB	0.17691	2.92623	0.646407	1.24985
AAEL000985-RC	5.59e-06	4.19e-06	5.48e-05	2.15267e-05
AAEL000985-RD	16.2499	11.2683	11.7609	13.093
AAEL000987-RA	9255.28	4120.3	4323.19	5899.59
AAEL000993-RB	12.9838	8.68066	7.4435	9.70265
AAEL000994-RA	16.2763	7.64011	9.38604	11.1008
AAEL000994-RB	0	0.000523387	6.14e-06	0.000176509
AAEL000994-RC	0	0	0	0
AAEL000994-RD	1.95581	2.68e-05	1.14e-05	0.651949
AAEL000994-RE	0	7.92903	1.94394	3.29099
AAEL000994-RF	0	0.148606	0	0.0495353
AAEL000994-RG	1.19713	2.34452	0.800276	1.44731
AAEL000994-RH	0	0	0	0
AAEL000994-RI	2.62753	0.403141	2.52679	1.85249
AAEL000994-RJ	0	0	6.57e-11	2.19e-11
AAEL000994-RK	0.194474	0.137183	0.364912	0.23219
AAEL000994-RL	0	0.409873	0.125775	0.178549
AAEL000994-RM	0	0	0	0
AAEL000994-RN	0.184589	0.206282	0.0792114	0.156694
AAEL000994-RO	0	0	0	0
AAEL000997-RB	0	0.377012	0.238408	0.20514
AAEL000999-RA	0.596149	1.198	1.08115	0.958433
AAEL001005-RA	294.314	340.306	358.351	330.99
AAEL001008-RA	21.9455	5.13675	5.32411	10.8021
AAEL001009-RB	2.25024	0.631854	0.608542	1.16355
AAEL001010-RB	0	0	0	0
AAEL001041-RA	5.35506	2.6092	0.629427	2.86456
AAEL001041-RB	75.4596	4.29427	9.84022	29.8647
AAEL001041-RC	1.35e-05	2.53694	1.34873	1.29523
AAEL001041-RD	1.76558	1.99e-06	0.514644	0.760075
AAEL001041-RE	8.6e-06	8.7e-07	7.49e-07	3.40633e-06
AAEL001041-RF	1.1e-06	6.01536	3.99068	3.33535
AAEL001041-RG	2.76651	3.4782	4.56346	3.60272
AAEL001041-RH	8.01137	3.32912	3.68155	5.00735
AAEL001041-RI	1.07453	0.955124	0.708926	0.91286
AAEL001041-RJ	6.52345	2.09543	3.07767	3.89885
AAEL001041-RK	2.12411	2.12622	1.29401	1.84811
AAEL001041-RL	0	0.210625	0.713777	0.308134
AAEL001041-RM	0	0	1.0357	0.345233
AAEL001041-RN	0	3.43497	0.517286	1.31742
AAEL001041-RO	0	1.99743	3.36144	1.78629
AAEL001041-RP	5.75e-09	5.13802	4.41e-08	1.71267
AAEL001041-RQ	0	3.95907	2.01765	1.99224
AAEL001041-RR	0.00032496	1.64667	0.96305	0.870015
AAEL001041-RS	0.139078	1.32619	0.999002	0.821423
AAEL001054-RB	0.262846	2.83145	0.985896	1.36006
AAEL001057-RA	0	0	0	0
AAEL001059-RA	0	0	0.0844906	0.0281635
AAEL001060-RA	0.036196	0.0119774	0.0755544	0.0412426
AAEL001060-RB	0	0	0	0
AAEL001060-RC	0	0	0	0
AAEL001061-RA	1.15817	0.0802251	0	0.412798
AAEL001061-RB	2402.18	53.2886	19.8497	825.106
AAEL001061-RC	86.9051	6.93462	3.88207	32.5739
AAEL001062-RB	22.8835	8.45619	6.11921	12.4863
AAEL001063-RA	0	0	0	0
AAEL001065-RA	48.23	23.8741	25.3247	32.4763
AAEL001067-RA	0	0	0	0
AAEL001068-RA	0.437995	0	0.16603	0.201342
AAEL001071-RA	2.89084	3.85365	9.63017	5.45822
AAEL001073-RA	0	0.0466198	0.0195999	0.0220732
AAEL001074-RB	0	0	0	0
AAEL001074-RC	0.0357072	0.0253171	0.0319457	0.03099
AAEL001074-RD	0	0	0	0
AAEL001076-RB	0	0	0	0
AAEL001076-RC	0	2.76e-06	0	9.2e-07
AAEL001076-RD	0	0.0294217	0.0286982	0.0193733
AAEL001076-RE	0	4e-09	0.0266791	0.00889303
AAEL001076-RF	0	7.29e-11	2.05e-09	7.07633e-10
AAEL001076-RG	0	0	0	0
AAEL001076-RH	0	0	0	0
AAEL001076-RI	0	4.57e-06	0	1.52333e-06
AAEL001077-RA	1.92982	0.732602	0.49872	1.05371
AAEL001080-RA	19.5107	9.71165	9.25114	12.8245
AAEL001082-RA	1.94637	5.26523	2.68746	3.29969
AAEL001084-RA	0.48724	0.134395	0.154056	0.258564
AAEL001085-RA	4.65596	21.8201	16.202	14.226
AAEL001086-RB	1.38808	1.69891	1.47896	1.52198
AAEL001087-RB	906.626	1.96253	0.976992	303.189
AAEL001088-RB	1.90982	1.68031	2.44038	2.01017
AAEL001088-RC	2.37648	5.85619	9.30361	5.84543
AAEL001089-RA	76.4574	9.52865	9.18972	31.7253
AAEL001090-RA	0	0	0.0346821	0.0115607
AAEL001091-RA	154.074	15.0904	13.8469	61.0038
AAEL001092-RA	253.567	76.0673	83.482	137.705
AAEL001094-RA	70.6062	12.5807	10.2779	31.1549
AAEL001094-RB	88.0026	10.2177	8.10626	35.4422
AAEL001094-RC	0.732086	0	0.000320491	0.244135
AAEL001094-RD	3.87493	2.04801	0.357918	2.09362
AAEL001095-RA	0.323309	0.53523	0.650383	0.502974
AAEL001096-RA	0	0	0	0
AAEL001098-RA	7.96747	0.271159	0.986174	3.07493
AAEL001099-RA	2.22843	5.20354	5.4482	4.29339
AAEL001099-RB	2.83479	1.59e-08	1.6e-05	0.944935
AAEL001099-RC	2.0697	1.16e-08	1.23e-05	0.689904
AAEL001152-RB	13.1313	20.346	21.0394	18.1722
AAEL001154-RA	88.7647	34.9354	41.8151	55.1717
AAEL001155-RA	5.62956	2.55477	2.4922	3.55884
AAEL001156-RA	0.122233	0	0.0241768	0.0488033
AAEL001156-RB	0.0363201	0	0.00888802	0.0150694
AAEL001159-RA	71.5517	57.7185	53.0412	60.7705
AAEL001162-RA	8.73133	0.0270435	2.30541	3.68793
AAEL001162-RB	0	2.12737	0	0.709123
AAEL001163-RA	2.0407	0.734876	2.53069	1.76876
AAEL001164-RA	1553.45	246.18	238.725	679.452
AAEL001166-RA	39.0382	12.3747	11.8211	21.078
AAEL001166-RB	2.39064	1.53438	0.757093	1.5607
AAEL001166-RC	4.48059	1.18418	2.10955	2.59144
AAEL001167-RA	0	0.502629	1.00312	0.501916
AAEL001167-RB	0	0	0	0
AAEL001167-RC	0	0	0	0
AAEL001167-RD	0	0	0	0
AAEL001167-RE	0	0	0	0
AAEL001167-RF	0	0	0	0
AAEL001167-RG	0	0	0.365875	0.121958
AAEL001167-RH	0	0	0	0
AAEL001167-RI	0.936691	0	0.273623	0.403438
AAEL001167-RJ	0	0.589143	0	0.196381
AAEL001167-RK	0	0	1.08e-07	3.6e-08
AAEL001168-RB	0	0	0	0
AAEL001168-RC	0	0	0	0
AAEL001168-RD	0	0	0.0705371	0.0235124
AAEL001168-RE	0	4.7e-07	0	1.56667e-07
AAEL001168-RF	0.114822	0.031661	0.0160155	0.0541662
AAEL001169-RA	29.0699	26.346	23.5467	26.3209
AAEL001170-RA	19.2051	5.92766	6.7906	10.6411
AAEL001171-RA	23.3689	22.2739	21.8749	22.5059
AAEL001172-RA	0	3.7823	3.88394	2.55541
AAEL001172-RB	5.35614	0.0304909	0	1.79554
AAEL001173-RA	5.26498	4.29571	2.35803	3.97291
AAEL001173-RB	1.29e-10	0.409248	0.31266	0.240636
AAEL001173-RC	7.45e-10	6.93e-10	1.33105	0.443683
AAEL001175-RA	5.31306	3.2526	3.56873	4.0448
AAEL001176-RA	25.878	56.3124	54.7304	45.6403
AAEL001176-RB	5.73103	9.02951	13.569	9.44318
AAEL001177-RA	130.09	40.0033	36.1266	68.74
AAEL001178-RB	1.64945	0	0	0.549817
AAEL001181-RB	0	0	0.036393	0.012131
AAEL001182-RA	70.1236	21.2065	25.188	38.8394
AAEL001183-RA	30.2776	8.83622	7.73849	15.6174
AAEL001184-RA	0	0	0	0
AAEL001184-RB	0	0	0	0
AAEL001184-RC	0	0	0	0
AAEL001184-RD	0	0	0	0
AAEL001184-RE	1.14628	0.393281	0.583442	0.707668
AAEL001184-RF	0	0	0	0
AAEL001185-RA	4.18981	4.97493	6.59004	5.25159
AAEL001187-RA	16.6401	14.5552	14.531	15.2421
AAEL001189-RA	1.30537	1.1257	1.19122	1.20743
AAEL001190-RA	97.6872	25.9865	32.5192	52.0643
AAEL001191-RA	0	4.78711	2.46065	2.41592
AAEL001191-RB	6.28634	8.27298	10.5596	8.37297
AAEL001191-RC	1.77008	1.16398	0.518495	1.15085
[truncated: 15,973 more rows]

## Sheet: KallistoY1
Name	M1Y1	M1Y2	M1Y3	Y1 Average
[truncated: 16,516 more rows]

[truncated: 1 more sheets: KallistoY7]
